# Supplementary material for: Functional lability of RNA-dependent RNA polymerases in animals
Source: PubMed Central journal article supplement (PMC6396948; doi:10.1371/journal.pgen.1007915), 2019-02-19

Selecting proteomes with at least 1000 proteins of at least 1000 amino acids:

RdRP classes:

● Eukaryotic RdRP (PFAM #PF05183)

● Viral RdRP (PFAM #PF00680)

● Viral RdRP (PFAM #PF04196)

● Viral RdRP (PFAM #PF00978)

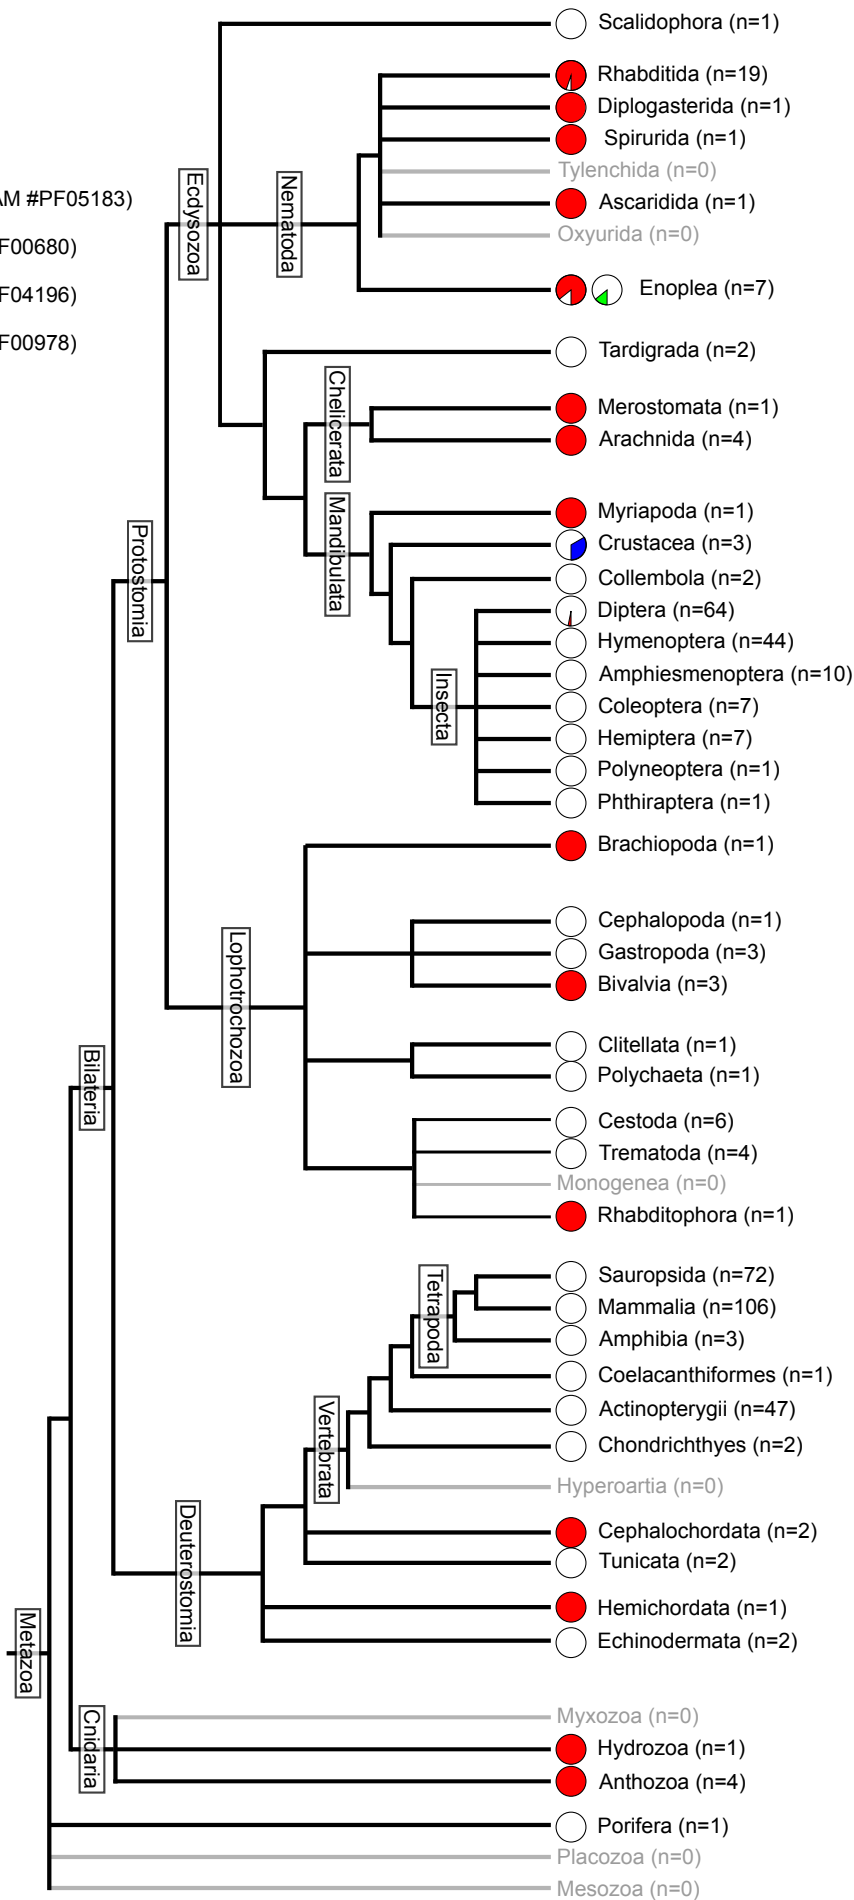

Selecting proteomes with at least 5000 proteins of at least 500 amino acids:

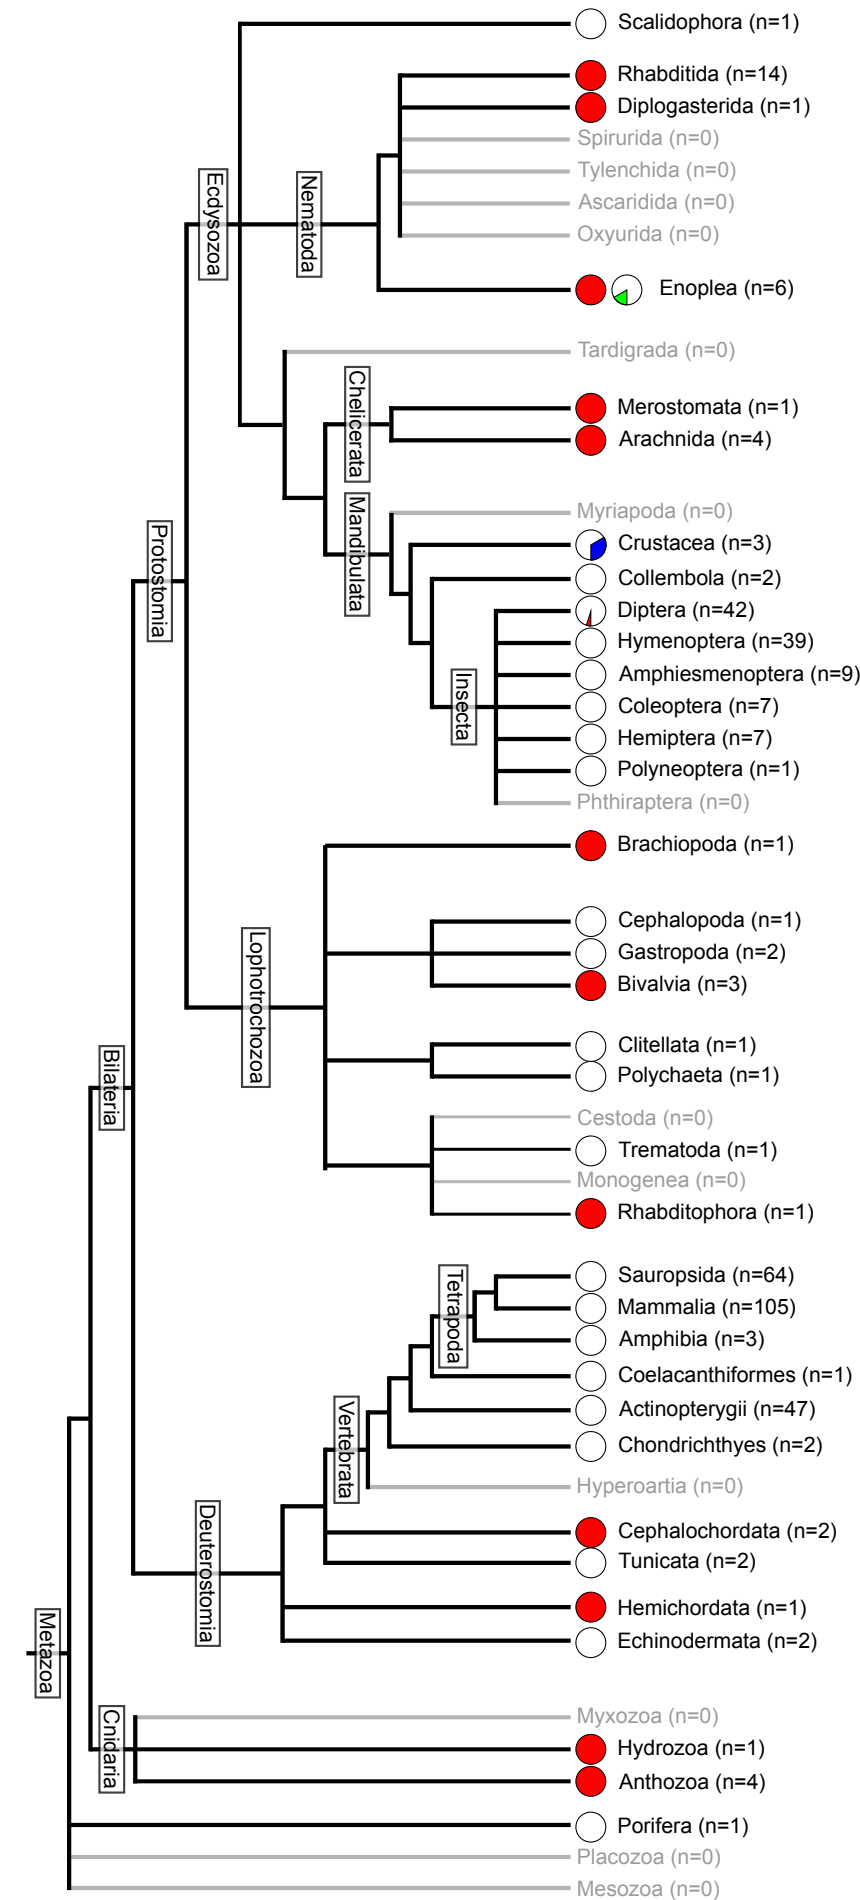

Supplement: pgen.1007915.s001.pdf [file pgen.1007915.s001.pdf]
