# Supplementary material for: Functional lability of RNA-dependent RNA polymerases in animals
Source: PubMed Central journal article supplement (PMC6396948; doi:10.1371/journal.pgen.1007915), 2019-02-19

1: Total 5'-monophosphorylated small RNAs  
 2: 3'-modified, 5'-monophosphorylated small RNAs  
 3: Total 5'-polyphosphorylated or 5'-OH small RNAs  
 4: 3'-modified 5'-polyphosphorylated or 5'-OH small RNAs

■ No adapter  
 ■ Extragenomic  
 ■ Abundant ncRNA  
 ■ Genome mapper, not matching abundant ncRNAs

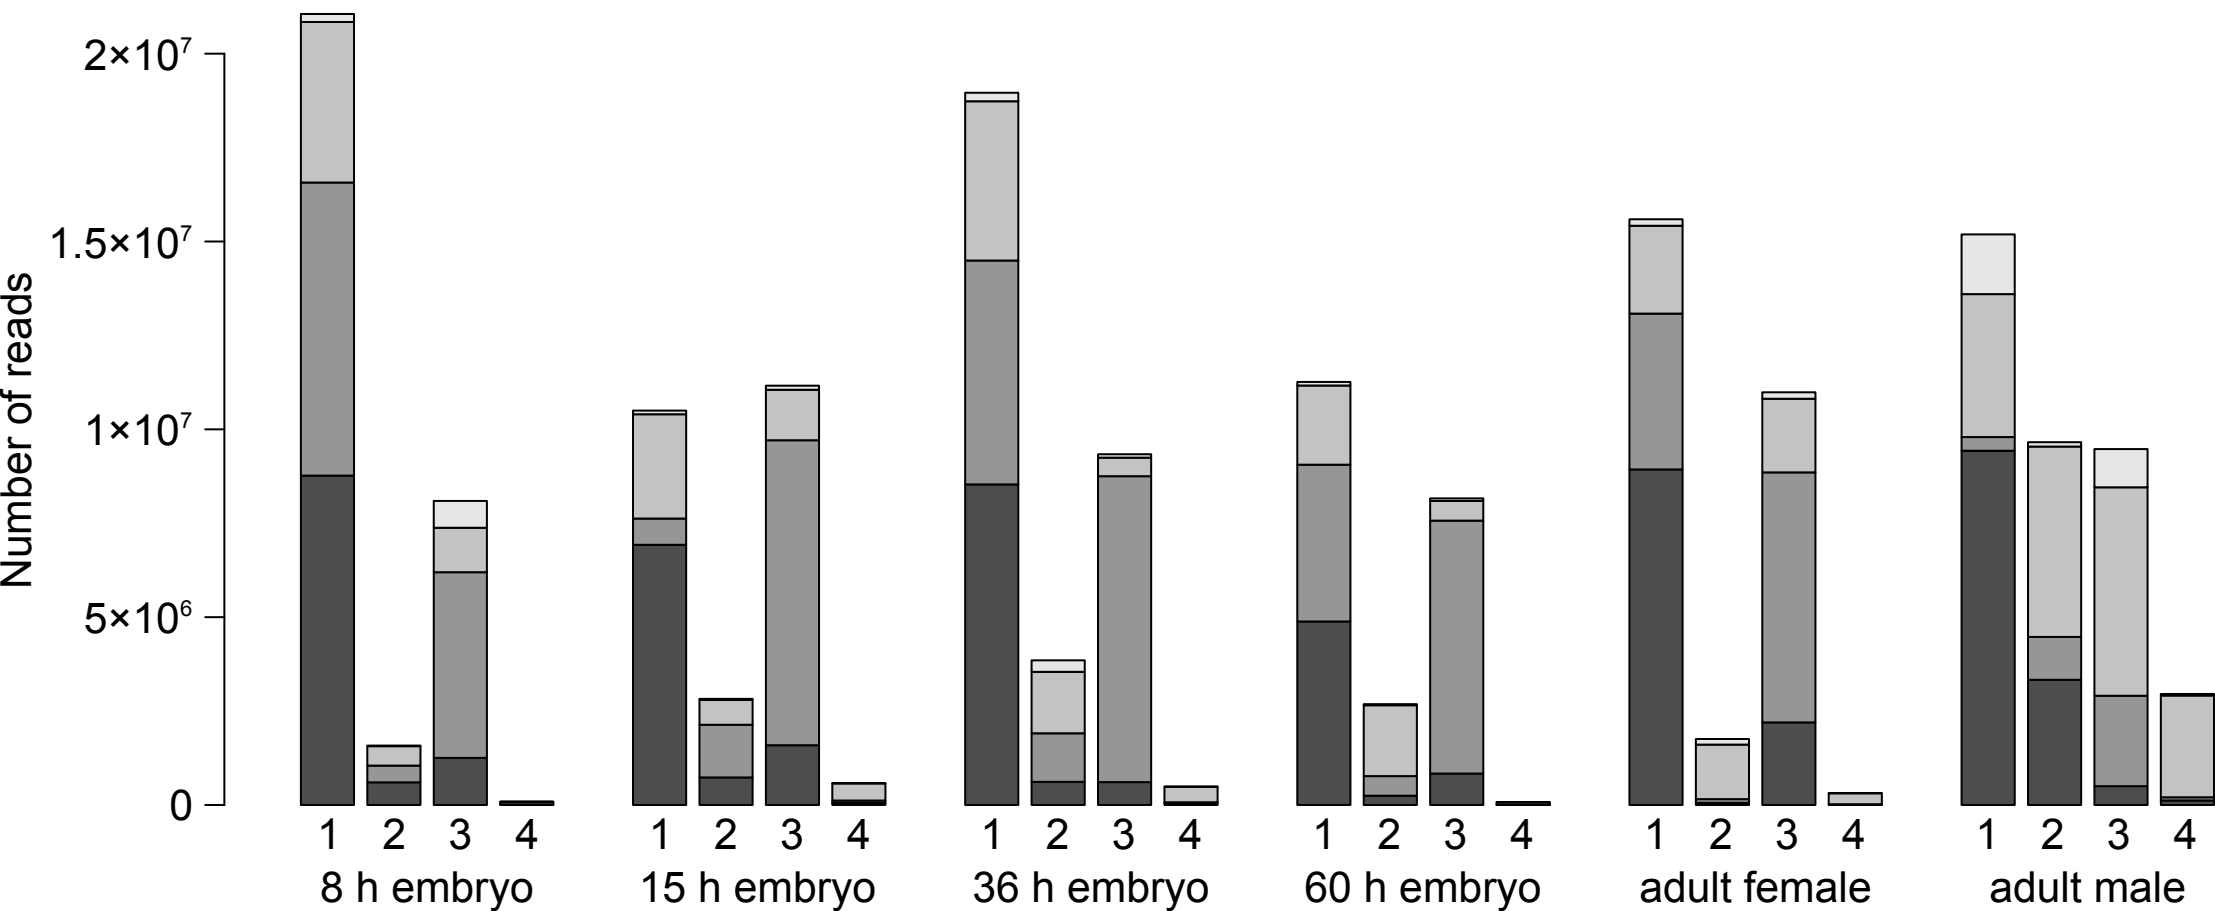

Supplement: pgen.1007915.s002.pdf [file pgen.1007915.s002.pdf]
