# Supplementary material for: Functional lability of RNA-dependent RNA polymerases in animals
Source: PubMed Central journal article supplement (PMC6396948; doi:10.1371/journal.pgen.1007915), 2019-02-19
Supplement: pgen.1007915.s004.pdf [file pgen.1007915.s004.pdf]

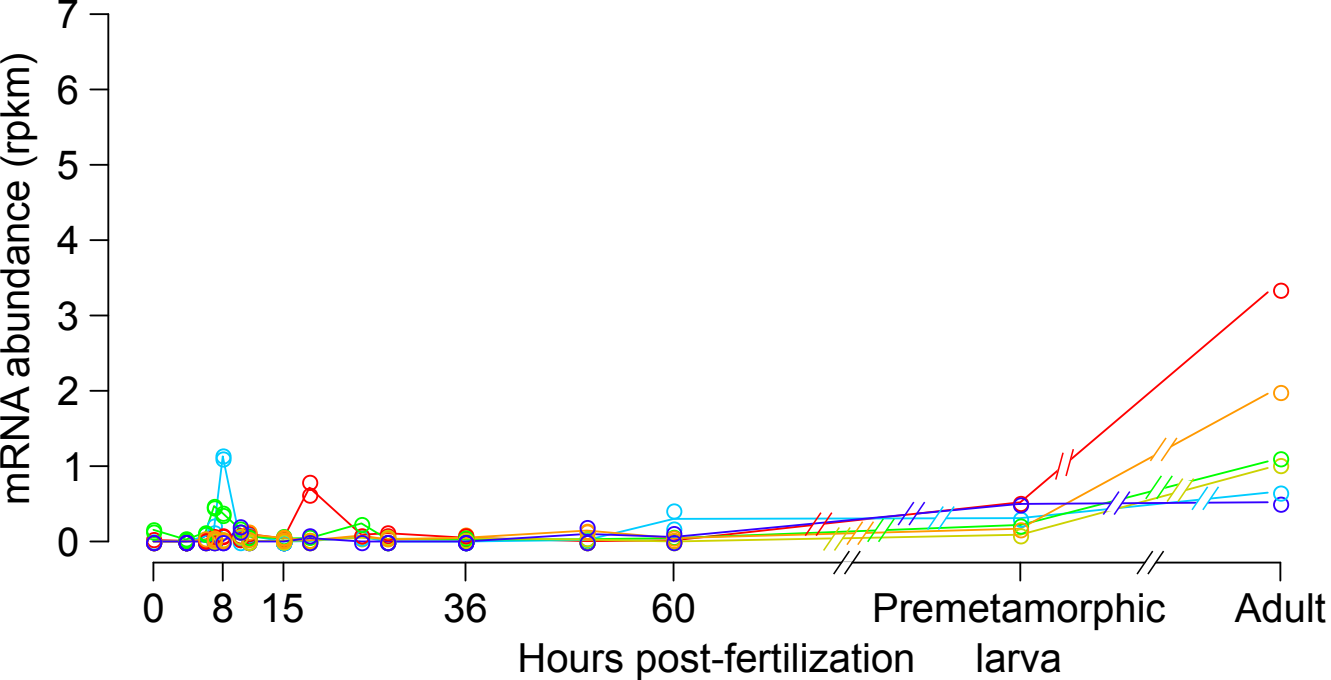

Expression of RdRP candidates:

- : BL09945 (with active site) ( $p$ -value=0.009)
- : BL02069 (with active site) ( $p$ -value=0.016)
- : BL23385 (with active site) ( $p$ -value=0.025)
- : BL27717 ( $p$ -value=0.092)
- : BL19289 ( $p$ -value=0.055)
- : BL07831 ( $p$ -value=0.042)
