# Supplementary material for: Functional lability of RNA-dependent RNA polymerases in animals
Source: PubMed Central journal article supplement (PMC6396948; doi:10.1371/journal.pgen.1007915), 2019-02-19
Supplement: pgen.1007915.s007.pdf [file pgen.1007915.s007.pdf]

# Functional lability of RNA-dependent RNA polymerases in animals: Supplementary Data

Natalia Pinzón, Stéphanie Bertrand, Lucie Subirana, Isabelle Busseau, Hector Escrivá and Hervé Seitz

## Contents

|          |                                                                                                    |            |
|----------|----------------------------------------------------------------------------------------------------|------------|
| <b>1</b> | <b>Genomic reads not matching abundant ncRNAs</b>                                                  | <b>3</b>   |
| 1.1      | Libraries #1 (total 5' monophosphorylated small RNAs)                                              | 3          |
| 1.2      | Libraries #2 (3' modified, 5' monophosphorylated small RNAs)                                       | 9          |
| 1.3      | Libraries #3 (total 5' hydroxyl or polyphosphorylated small RNAs)                                  | 15         |
| 1.4      | Libraries #4 (3' modified, 5' hydroxyl or polyphosphorylated small RNAs)                           | 21         |
| <b>2</b> | <b>pre-miRNA hairpin-matching reads</b>                                                            | <b>27</b>  |
| 2.1      | Libraries #1 (total 5' monophosphorylated small RNAs)                                              | 27         |
| 2.2      | Libraries #2 (3' modified, 5' monophosphorylated small RNAs)                                       | 39         |
| 2.3      | Libraries #3 (total 5' hydroxyl or polyphosphorylated small RNAs)                                  | 51         |
| 2.4      | Libraries #4 (3' modified, 5' hydroxyl or polyphosphorylated small RNAs)                           | 63         |
| <b>3</b> | <b>Transcriptome-matching reads (excluding pre-miRNA and abundant ncRNA-matching reads)</b>        | <b>75</b>  |
| 3.1      | Libraries #1 (total 5' monophosphorylated small RNAs)                                              | 75         |
| 3.2      | Libraries #2 (3' modified, 5' monophosphorylated small RNAs)                                       | 87         |
| 3.3      | Libraries #3 (total 5' hydroxyl or polyphosphorylated small RNAs)                                  | 99         |
| 3.4      | Libraries #4 (3' modified, 5' hydroxyl or polyphosphorylated small RNAs)                           | 111        |
| <b>4</b> | <b>Reads matching RNAs with long ORF's</b>                                                         | <b>123</b> |
| 4.1      | Libraries #1 (total 5' monophosphorylated small RNAs)                                              | 123        |
| 4.2      | Libraries #2 (3' modified, 5' monophosphorylated small RNAs)                                       | 135        |
| 4.3      | Libraries #3 (total 5' hydroxyl or polyphosphorylated small RNAs)                                  | 147        |
| 4.4      | Libraries #4 (3' modified, 5' hydroxyl or polyphosphorylated small RNAs)                           | 159        |
| <b>5</b> | <b>Extragenomic and extratranscriptomic reads</b>                                                  | <b>171</b> |
| 5.1      | Libraries #1 (total 5' monophosphorylated small RNAs)                                              | 171        |
| 5.2      | Libraries #2 (3' modified, 5' monophosphorylated small RNAs)                                       | 177        |
| 5.3      | Libraries #3 (total 5' hydroxyl or polyphosphorylated small RNAs)                                  | 183        |
| 5.4      | Libraries #4 (3' modified, 5' hydroxyl or polyphosphorylated small RNAs)                           | 189        |
| <b>6</b> | <b>Analysis of <i>Cænorhabditis elegans</i> data [Gu et al., 2009] with the same method</b>        | <b>195</b> |
| 6.1      | Genomic reads not matching abundant ncRNAs                                                         | 195        |
| 6.2      | pre-miRNA hairpin-matching reads                                                                   | 198        |
| 6.3      | Transcriptome-matching reads (excluding pre-miRNA and abundant ncRNA-matching reads)               | 204        |
| 6.4      | Reads matching RNAs with long ORF's                                                                | 210        |
| 6.5      | Extragenomic and extratranscriptomic reads                                                         | 216        |
| 6.6      | Extragenomic reads matching the transcriptome                                                      | 219        |
| <b>7</b> | <b>Extragenomic and extratranscriptomic reads matching the <i>Staphylococcus aureus</i> genome</b> | <b>225</b> |
| 7.1      | Libraries #1 (total 5' monophosphorylated small RNAs)                                              | 225        |
| 7.2      | Libraries #2 (3' modified, 5' monophosphorylated small RNAs)                                       | 231        |
| 7.3      | Libraries #3 (total 5' hydroxyl or polyphosphorylated small RNAs)                                  | 237        |
| 7.4      | Libraries #4 (3' modified, 5' hydroxyl or polyphosphorylated small RNAs)                           | 243        |

|           |                                                                                                   |            |
|-----------|---------------------------------------------------------------------------------------------------|------------|
| <b>8</b>  | <b>Extragenomic and extratranscriptomic reads matching the <i>Vibrio alginolyticus</i> genome</b> | <b>249</b> |
| 8.1       | Libraries #1 (total 5' monophosphorylated small RNAs)                                             | 249        |
| 8.2       | Libraries #2 (3' modified, 5' monophosphorylated small RNAs)                                      | 255        |
| 8.3       | Libraries #3 (total 5' hydroxyl or polyphosphorylated small RNAs)                                 | 261        |
| 8.4       | Libraries #4 (3' modified, 5' hydroxyl or polyphosphorylated small RNAs)                          | 267        |
| <b>9</b>  | <b>Extragenomic and extratranscriptomic reads matching the <i>Vibrio anguillarum</i> genome</b>   | <b>273</b> |
| 9.1       | Libraries #1 (total 5' monophosphorylated small RNAs)                                             | 273        |
| 9.2       | Libraries #2 (3' modified, 5' monophosphorylated small RNAs)                                      | 279        |
| 9.3       | Libraries #3 (total 5' hydroxyl or polyphosphorylated small RNAs)                                 | 285        |
| 9.4       | Libraries #4 (3' modified, 5' hydroxyl or polyphosphorylated small RNAs)                          | 291        |
| <b>10</b> | <b>Extragenomic and extratranscriptomic reads matching the ATCV1 genome</b>                       | <b>297</b> |
| 10.1      | Libraries #1 (total 5' monophosphorylated small RNAs)                                             | 297        |
| 10.2      | Libraries #2 (3' modified, 5' monophosphorylated small RNAs)                                      | 303        |
| 10.3      | Libraries #3 (total 5' hydroxyl or polyphosphorylated small RNAs)                                 | 309        |
| 10.4      | Libraries #4 (3' modified, 5' hydroxyl or polyphosphorylated small RNAs)                          | 315        |
| <b>11</b> | <b>Extragenomic and extratranscriptomic reads matching extragenomic contig #18690</b>             | <b>321</b> |
| 11.1      | Libraries #1 (total 5' monophosphorylated small RNAs)                                             | 321        |
| 11.2      | Libraries #2 (3' modified, 5' monophosphorylated small RNAs)                                      | 327        |
| 11.3      | Libraries #3 (total 5' hydroxyl or polyphosphorylated small RNAs)                                 | 333        |
| 11.4      | Libraries #4 (3' modified, 5' hydroxyl or polyphosphorylated small RNAs)                          | 339        |
| <b>12</b> | <b>Extragenomic and extratranscriptomic reads matching extragenomic contig #7601</b>              | <b>345</b> |
| 12.1      | Libraries #1 (total 5' monophosphorylated small RNAs)                                             | 345        |
| 12.2      | Libraries #2 (3' modified, 5' monophosphorylated small RNAs)                                      | 351        |
| 12.3      | Libraries #3 (total 5' hydroxyl or polyphosphorylated small RNAs)                                 | 357        |
| 12.4      | Libraries #4 (3' modified, 5' hydroxyl or polyphosphorylated small RNAs)                          | 363        |
| <b>13</b> | <b>Extragenomic and extratranscriptomic reads matching extragenomic contig #38312</b>             | <b>369</b> |
| 13.1      | Libraries #1 (total 5' monophosphorylated small RNAs)                                             | 369        |
| 13.2      | Libraries #2 (3' modified, 5' monophosphorylated small RNAs)                                      | 375        |
| 13.3      | Libraries #3 (total 5' hydroxyl or polyphosphorylated small RNAs)                                 | 381        |
| 13.4      | Libraries #4 (3' modified, 5' hydroxyl or polyphosphorylated small RNAs)                          | 387        |
| <b>14</b> | <b>Extragenomic and extratranscriptomic reads matching extragenomic contig #3365</b>              | <b>393</b> |
| 14.1      | Libraries #1 (total 5' monophosphorylated small RNAs)                                             | 393        |
| 14.2      | Libraries #2 (3' modified, 5' monophosphorylated small RNAs)                                      | 399        |
| 14.3      | Libraries #3 (total 5' hydroxyl or polyphosphorylated small RNAs)                                 | 405        |
| 14.4      | Libraries #4 (3' modified, 5' hydroxyl or polyphosphorylated small RNAs)                          | 411        |
| <b>15</b> | <b>Extragenomic and extratranscriptomic reads matching extragenomic contig #10883</b>             | <b>417</b> |
| 15.1      | Libraries #1 (total 5' monophosphorylated small RNAs)                                             | 417        |
| 15.2      | Libraries #2 (3' modified, 5' monophosphorylated small RNAs)                                      | 423        |
| 15.3      | Libraries #3 (total 5' hydroxyl or polyphosphorylated small RNAs)                                 | 429        |
| 15.4      | Libraries #4 (3' modified, 5' hydroxyl or polyphosphorylated small RNAs)                          | 435        |

# 1 Genomic reads not matching abundant ncRNAs

## 1.1 Libraries #1 (total 5' monophosphorylated small RNAs)

Embryo 8h, library 1:

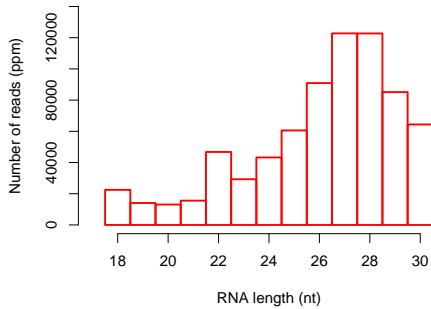

19-mers:

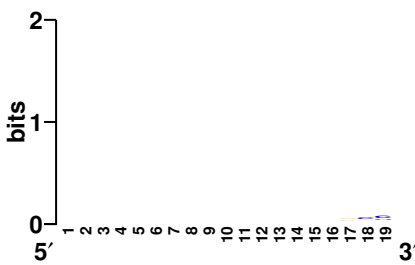

20-mers:

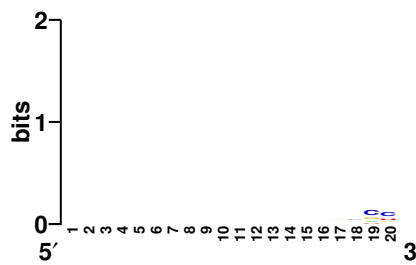

18-mers:

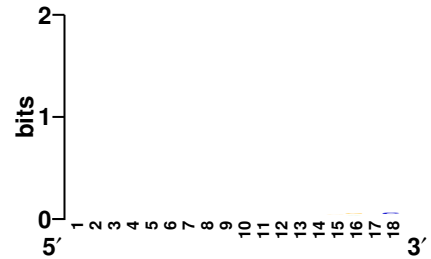

21-mers:

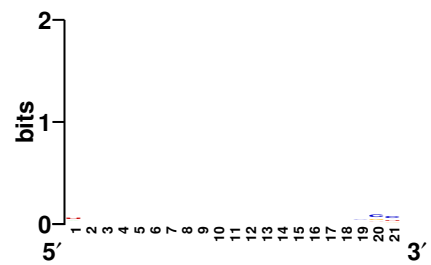

22-mers:

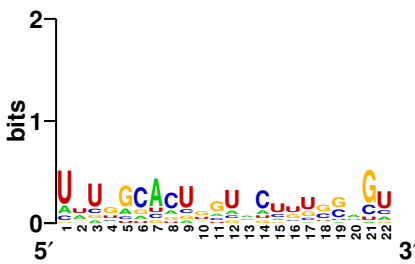

23-mers:

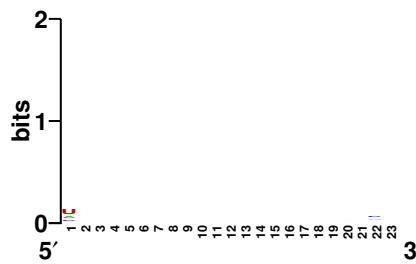

24-mers:

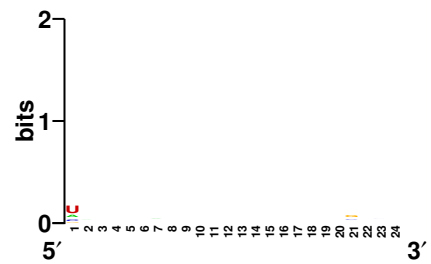

25-mers:

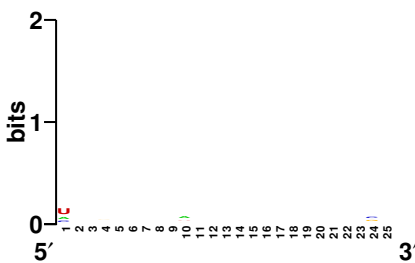

26-mers:

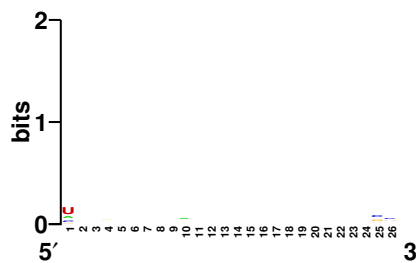

27-mers:

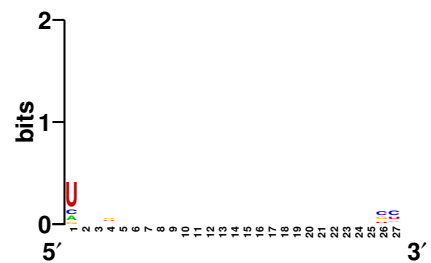

28-mers:

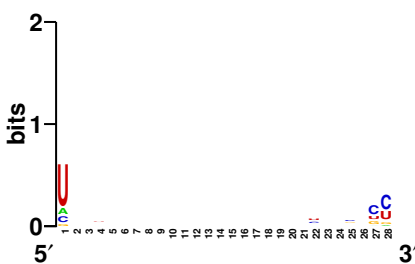

29-mers:

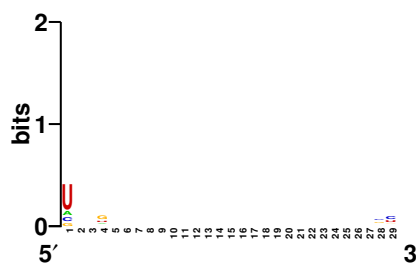

30-mers:

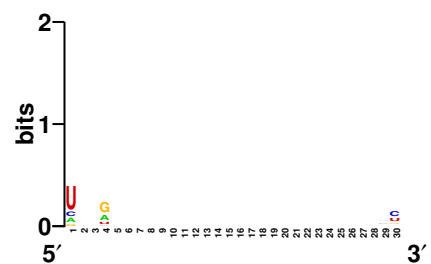

Embryo 15h, library 1:

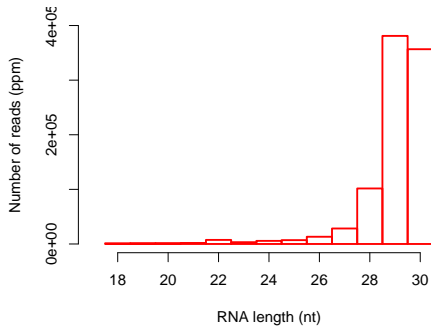

19-mers:

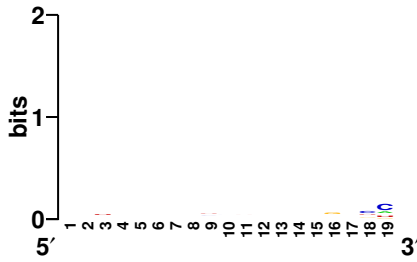

20-mers:

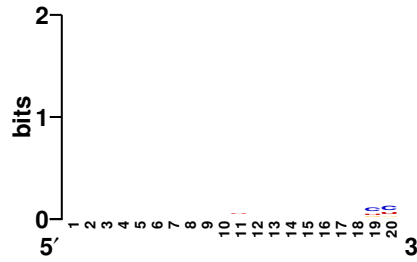

18-mers:

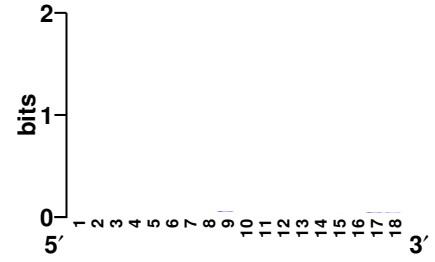

21-mers:

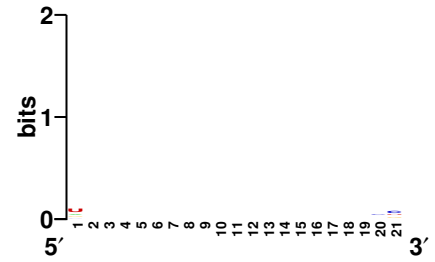

22-mers:

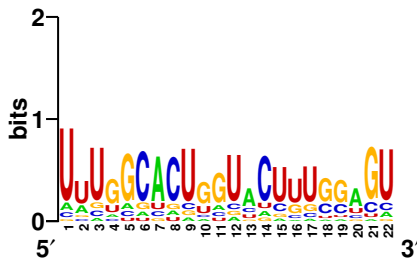

23-mers:

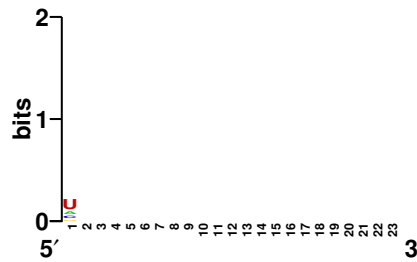

24-mers:

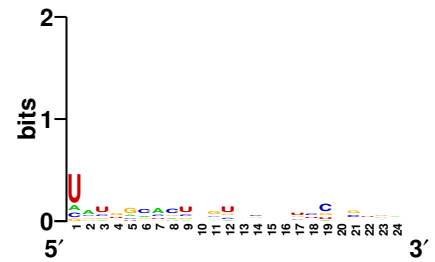

25-mers:

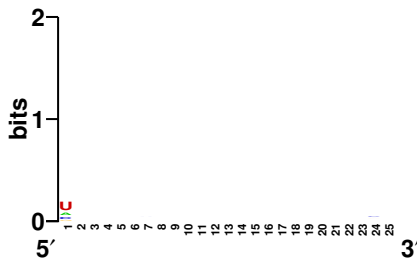

26-mers:

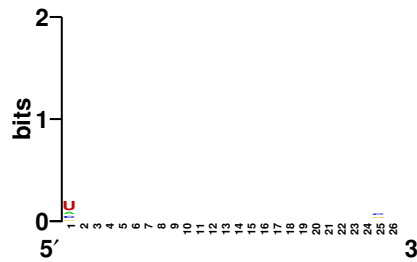

27-mers:

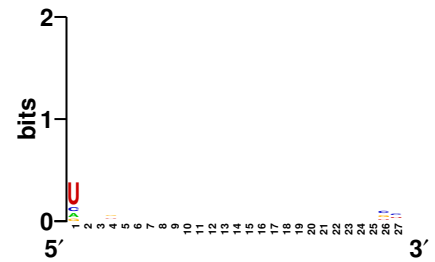

28-mers:

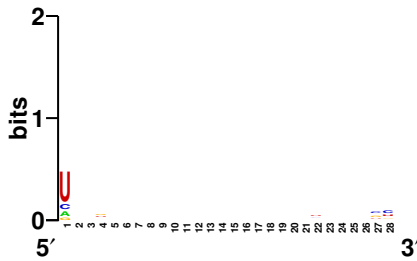

29-mers:

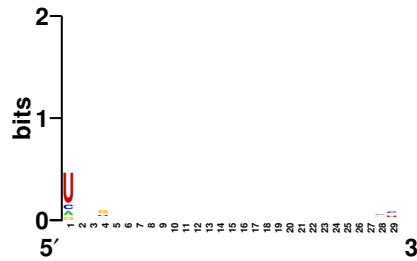

30-mers:

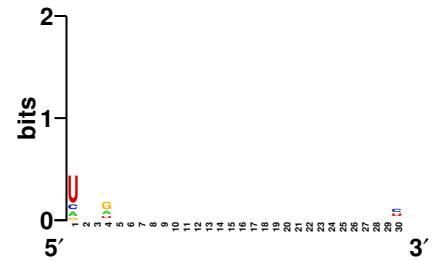

Embryo 36h, library 1:

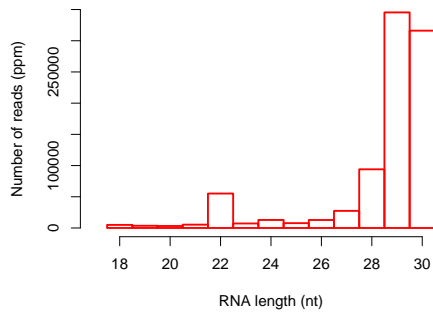

19-mers:

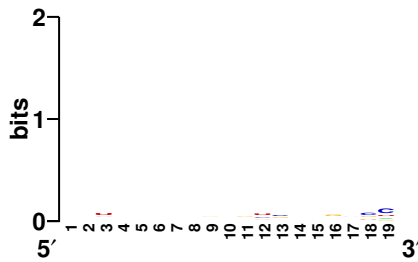

20-mers:

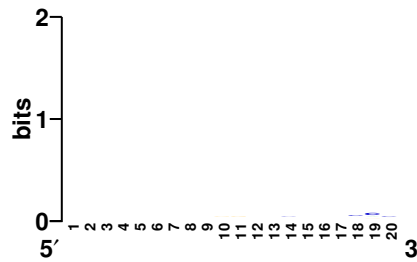

18-mers:

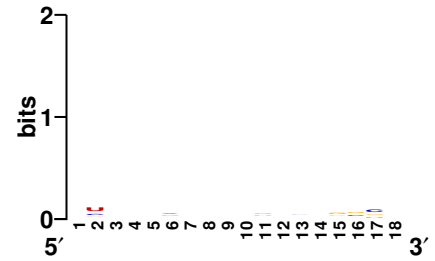

21-mers:

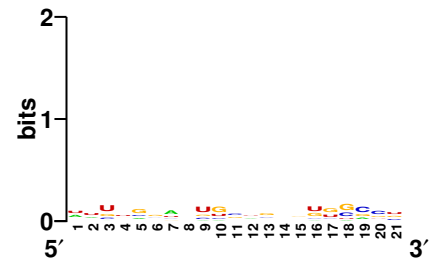

22-mers:

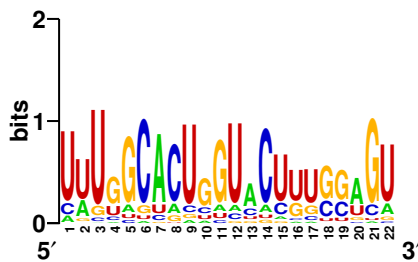

23-mers:

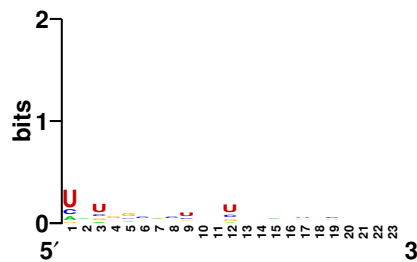

24-mers:

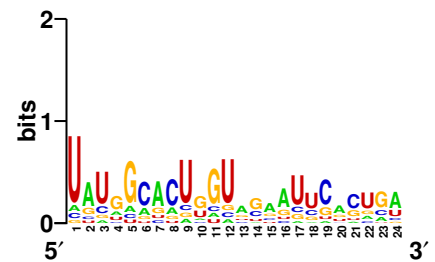

25-mers:

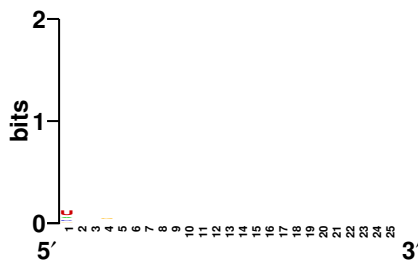

26-mers:

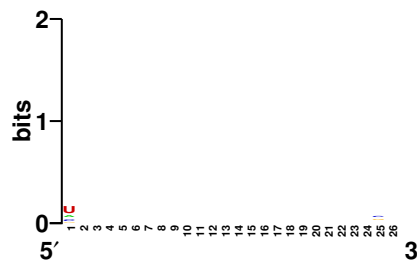

27-mers:

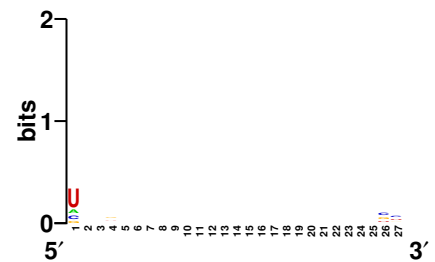

28-mers:

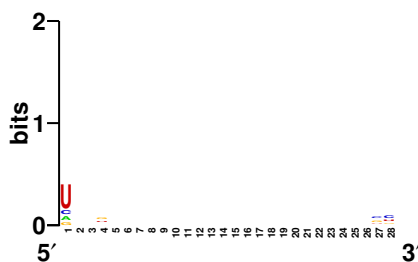

29-mers:

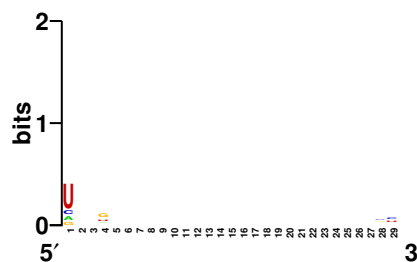

30-mers:

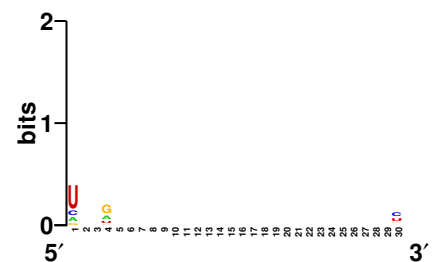

Embryo 60h, library 1:

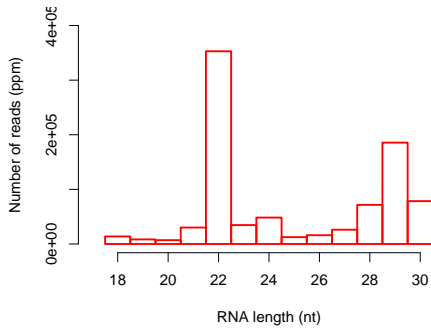

19-mers:

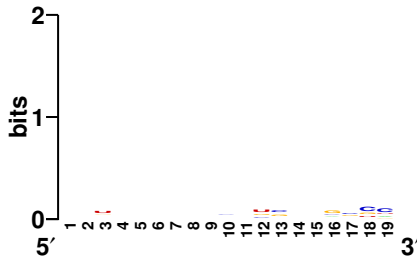

20-mers:

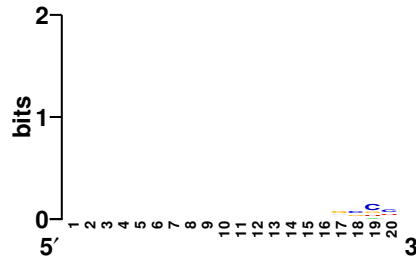

18-mers:

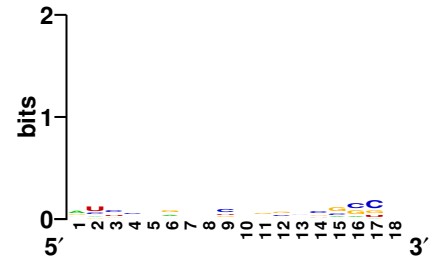

21-mers:

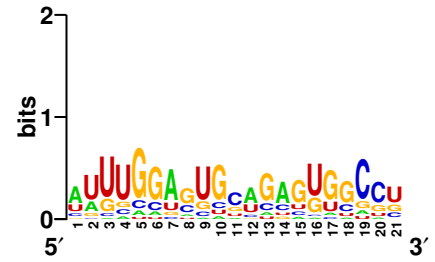

22-mers:

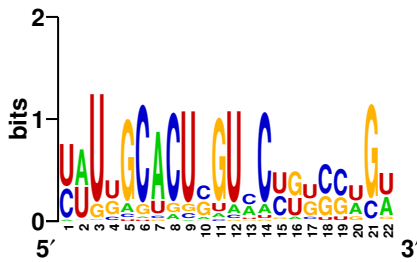

23-mers:

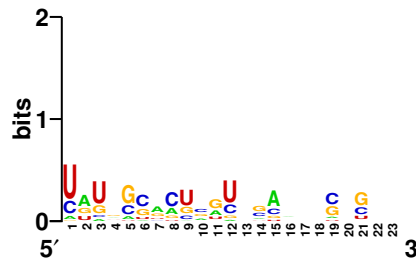

24-mers:

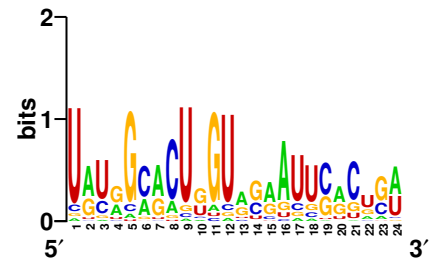

25-mers:

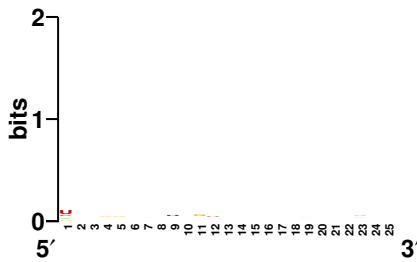

26-mers:

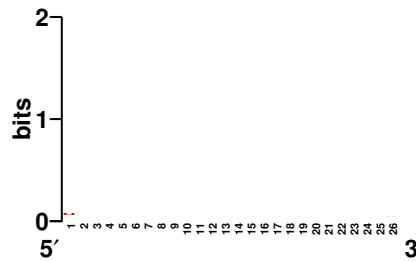

27-mers:

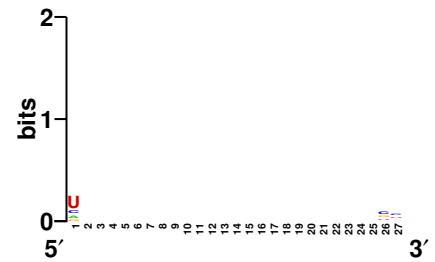

28-mers:

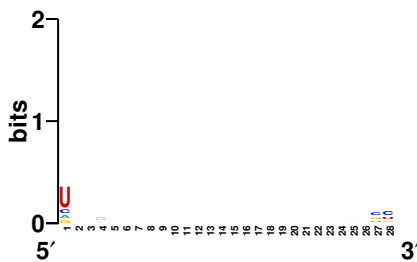

29-mers:

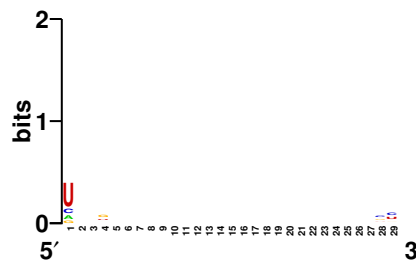

30-mers:

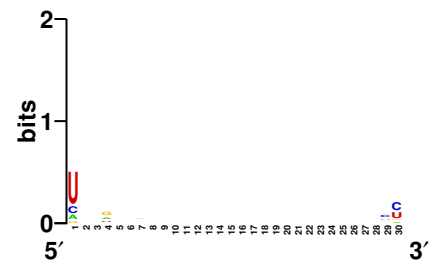

Adult female, library 1:

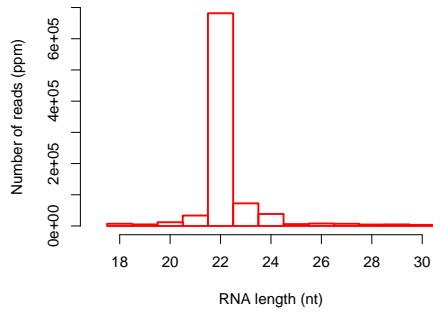

19-mers:

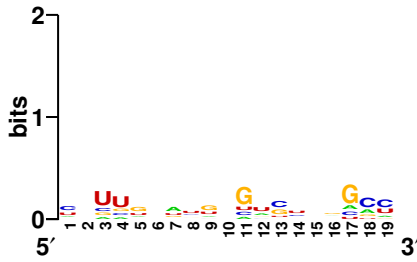

20-mers:

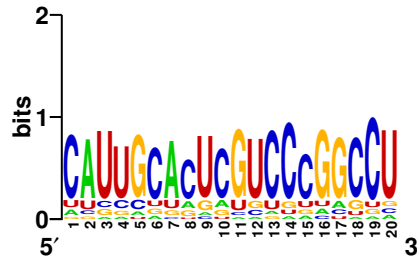

18-mers:

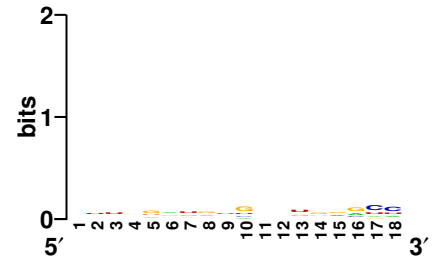

21-mers:

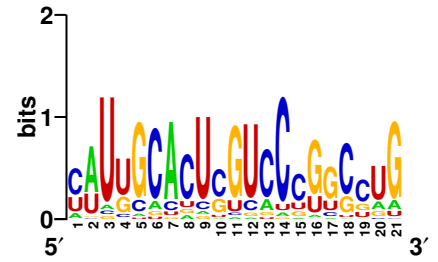

22-mers:

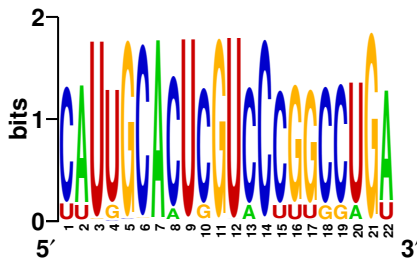

23-mers:

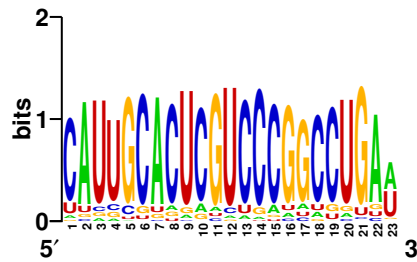

24-mers:

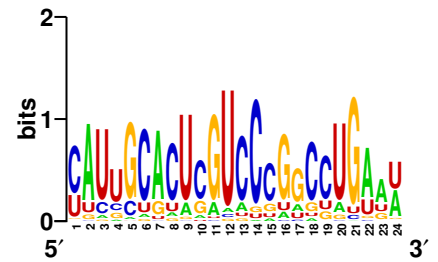

25-mers:

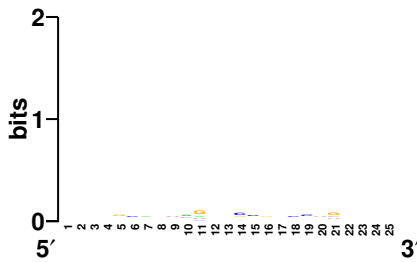

26-mers:

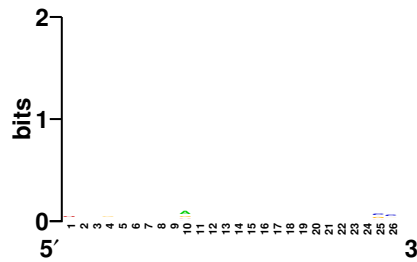

27-mers:

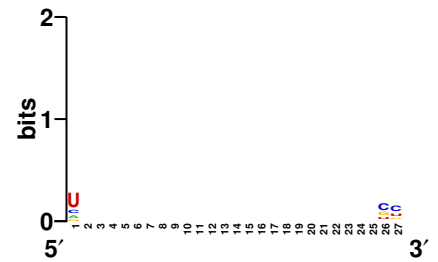

28-mers:

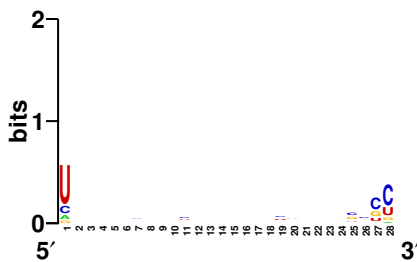

29-mers:

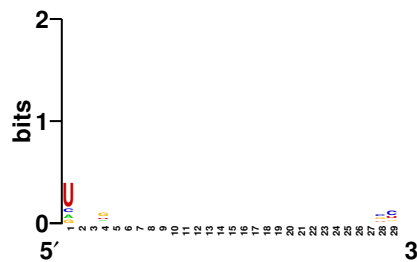

30-mers:

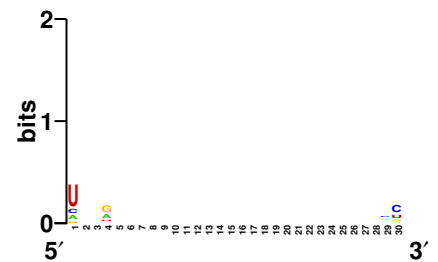

Adult male, library 1:

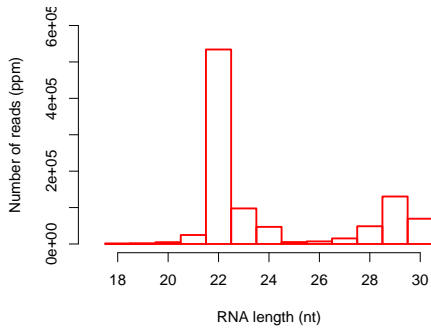

19-mers:

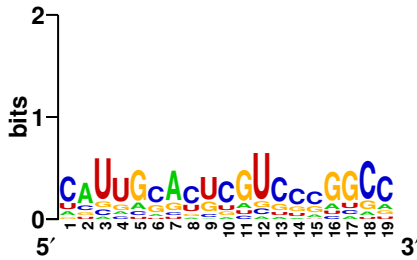

20-mers:

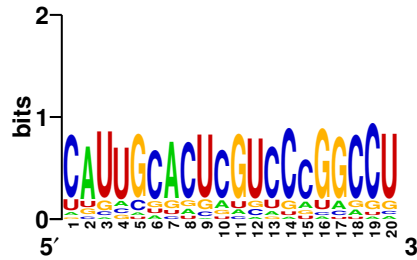

18-mers:

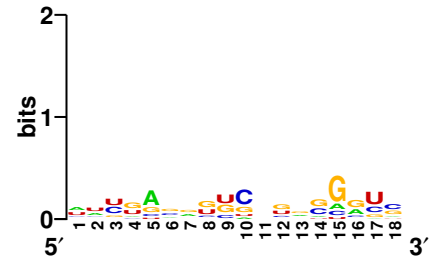

21-mers:

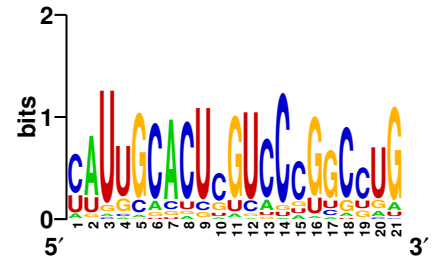

22-mers:

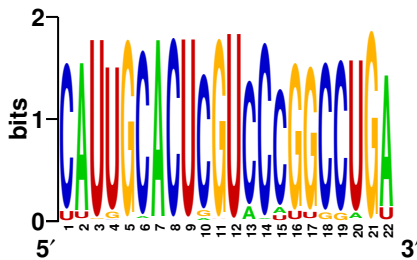

23-mers:

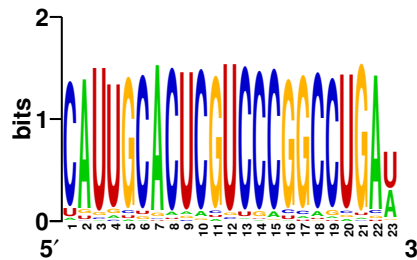

24-mers:

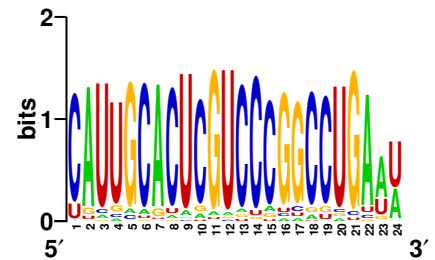

25-mers:

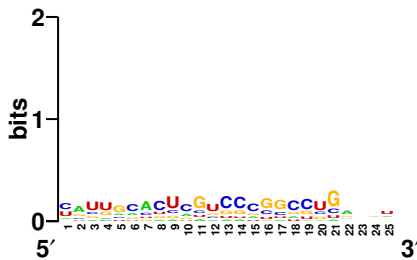

26-mers:

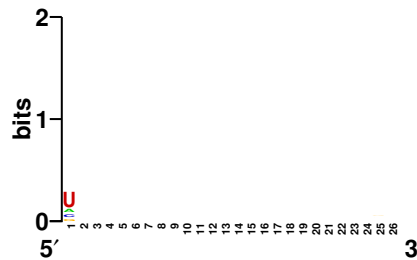

27-mers:

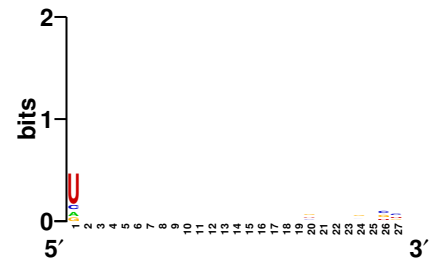

28-mers:

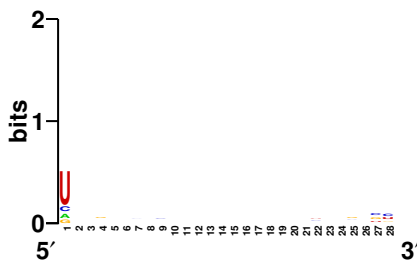

29-mers:

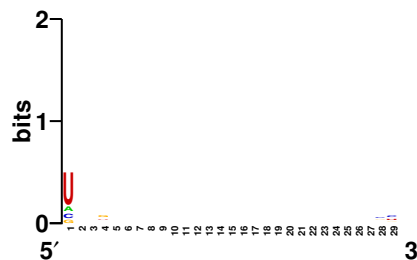

30-mers:

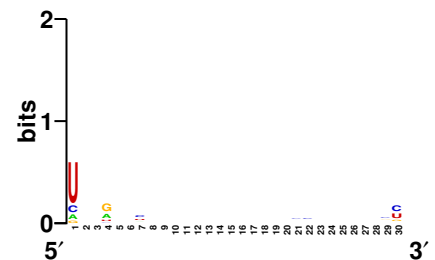



## 1.2 Libraries #2 (3' modified, 5' monophosphorylated small RNAs)

Embryo 8h, library 2:

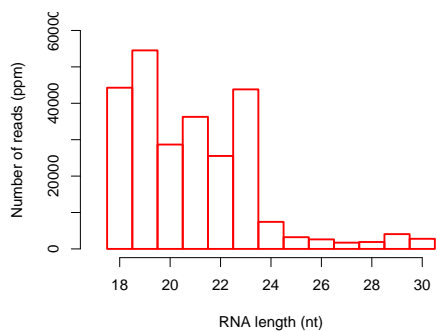

18-mers:

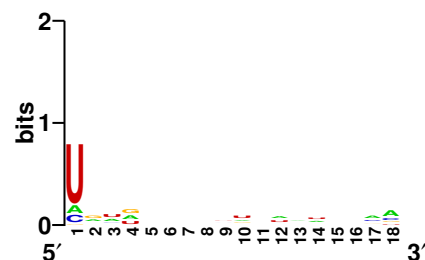

19-mers:

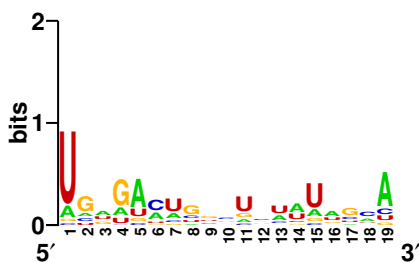

20-mers:

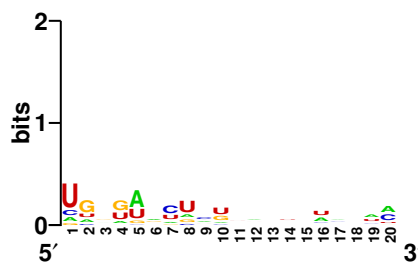

21-mers:

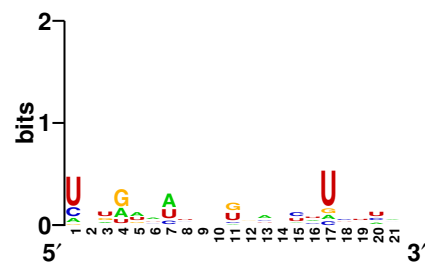

22-mers:

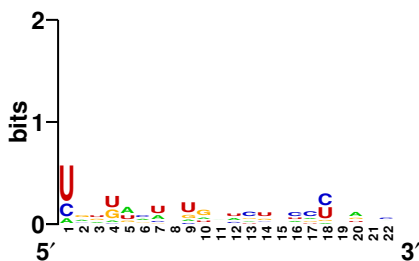

23-mers:

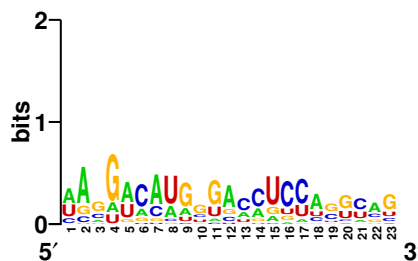

24-mers:

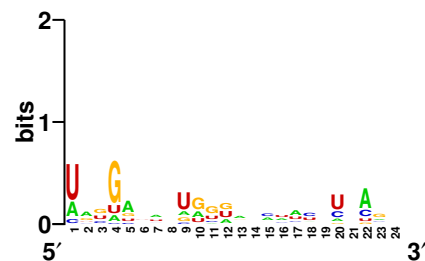

25-mers:

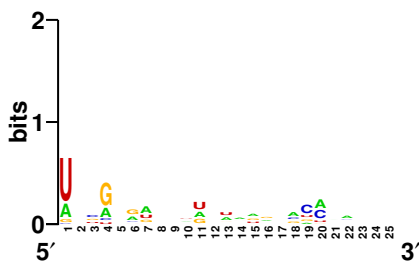

26-mers:

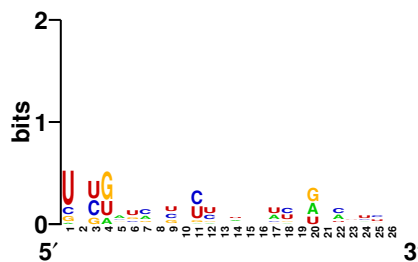

27-mers:

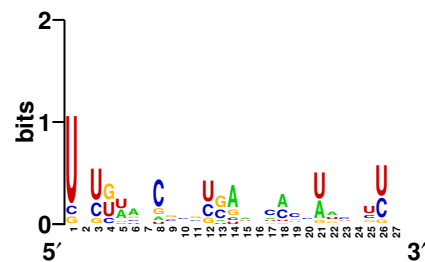

28-mers:

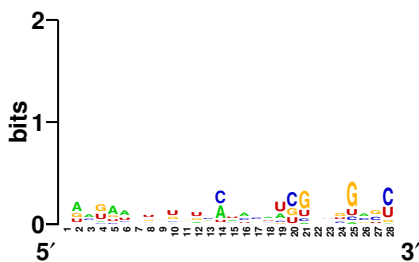

29-mers:

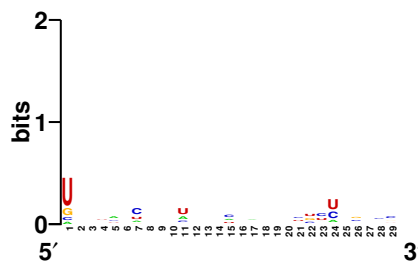

30-mers:

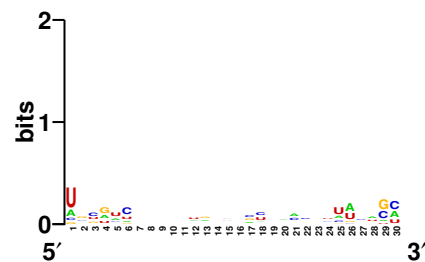

Embryo 15h, library 2:

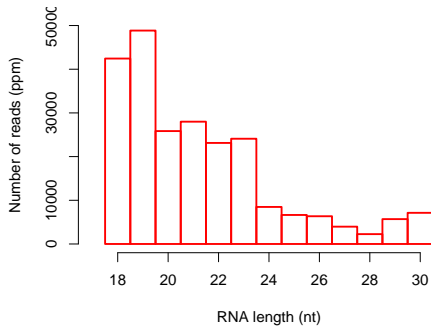

19-mers:

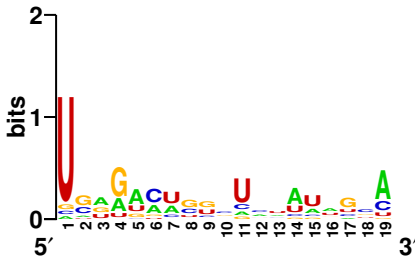

22-mers:

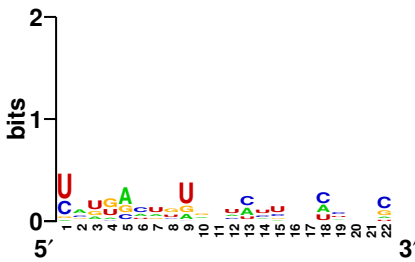

25-mers:

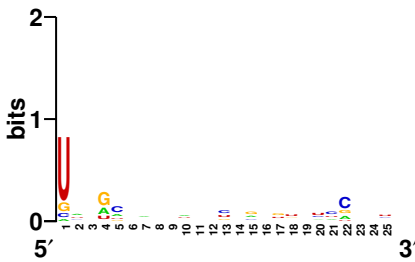

28-mers:

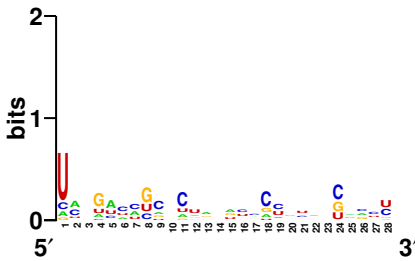

20-mers:

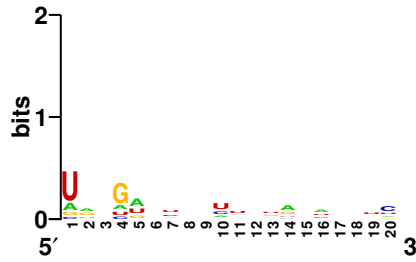

23-mers:

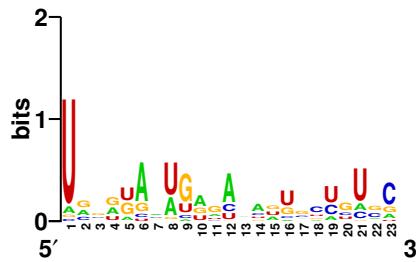

26-mers:

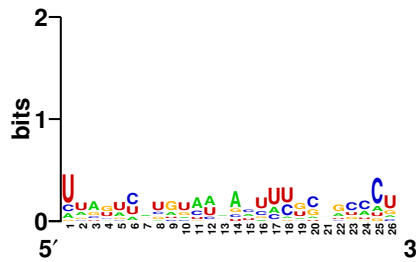

29-mers:

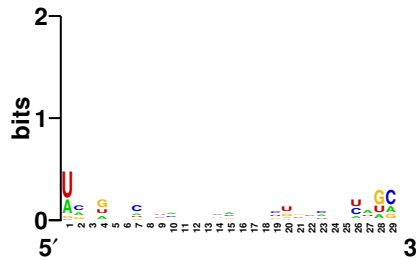

18-mers:

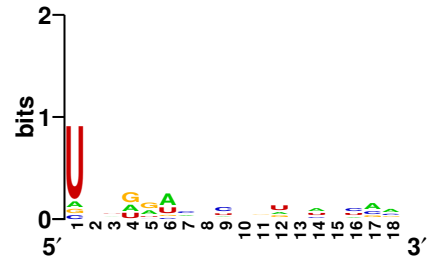

21-mers:

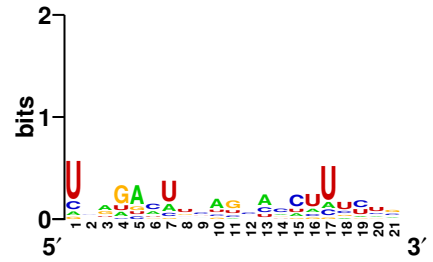

24-mers:

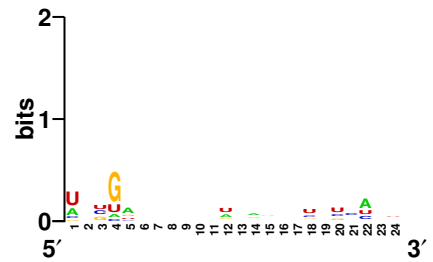

27-mers:

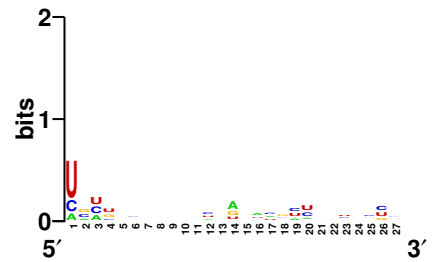

30-mers:

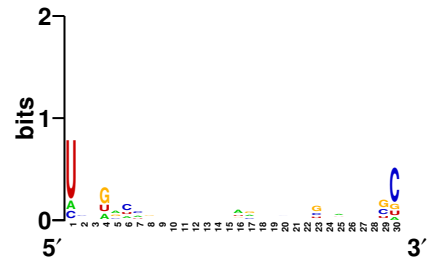

Embryo 36h, library 2:

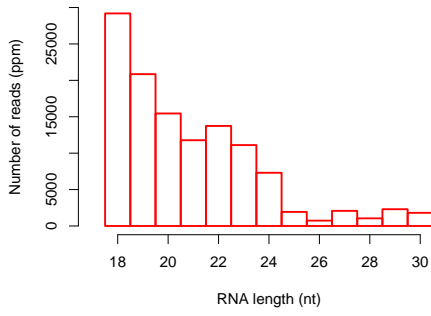

19-mers:

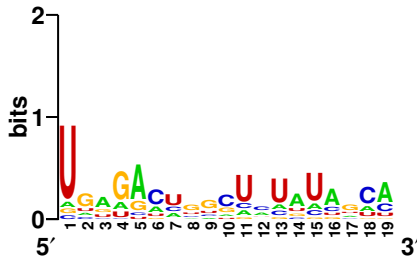

20-mers:

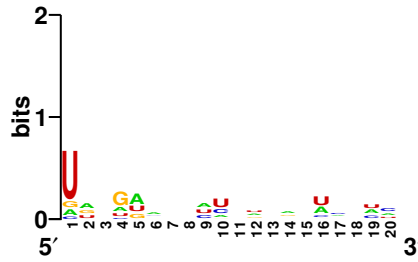

18-mers:

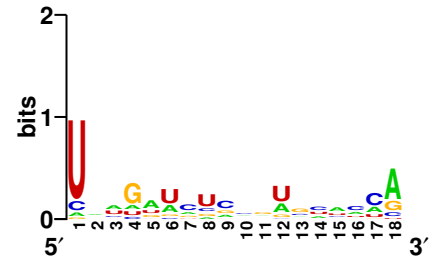

21-mers:

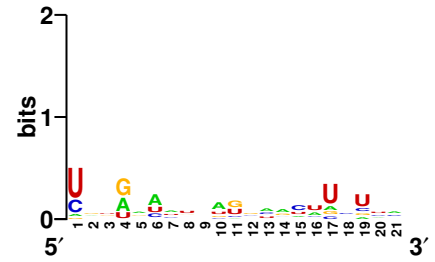

22-mers:

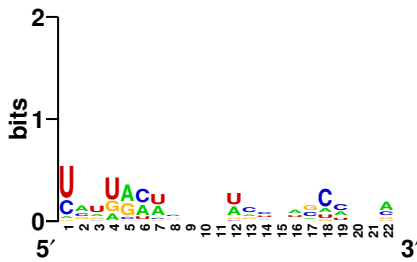

23-mers:

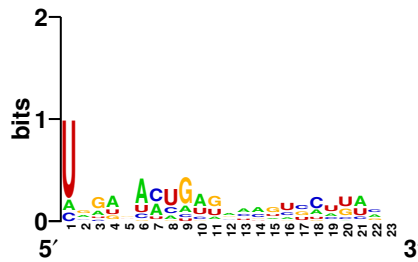

24-mers:

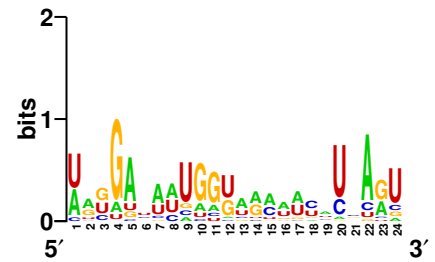

25-mers:

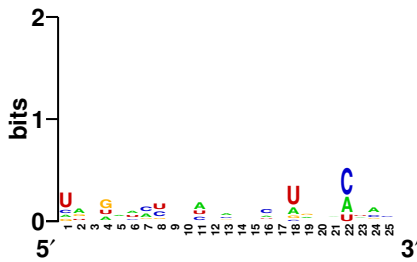

26-mers:

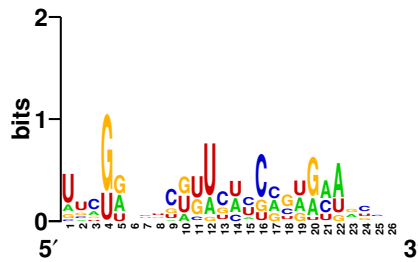

27-mers:

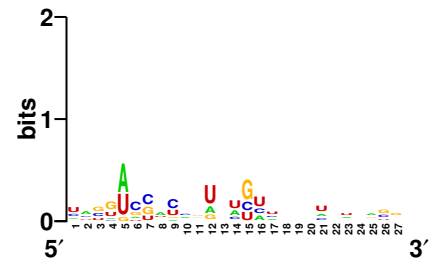

28-mers:

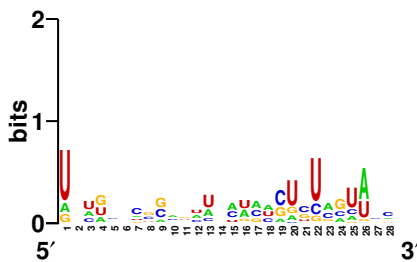

29-mers:

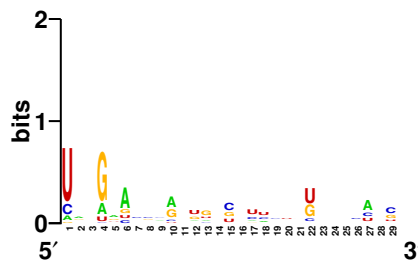

30-mers:

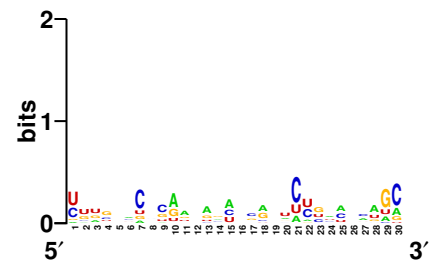

Embryo 60h, library 2:

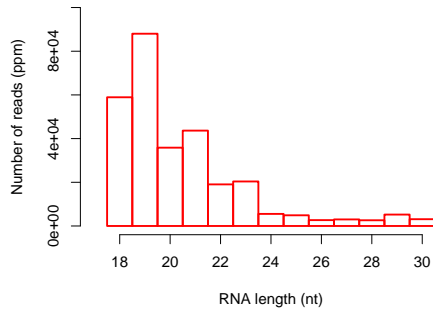

19-mers:

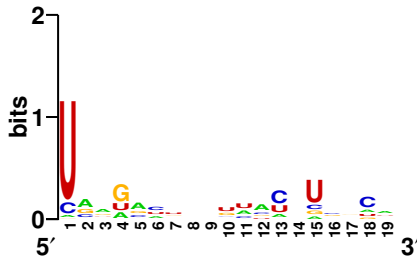

22-mers:

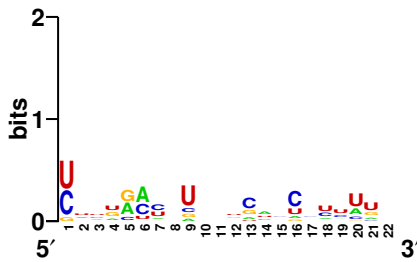

25-mers:

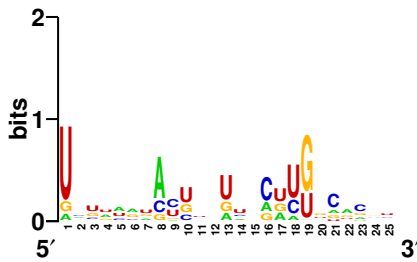

28-mers:

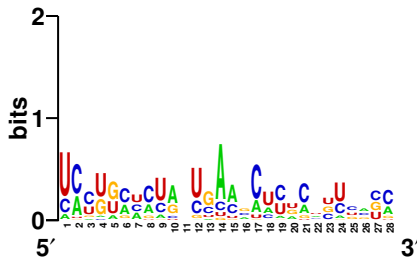

20-mers:

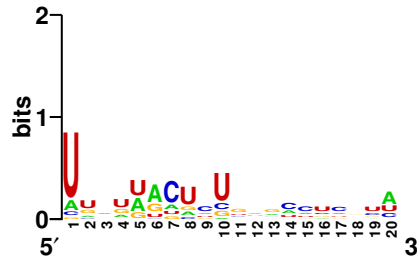

23-mers:

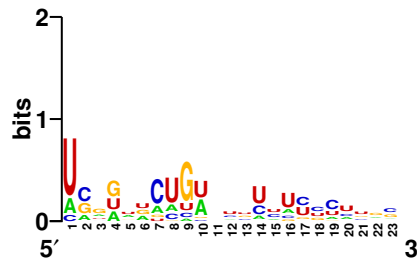

26-mers:

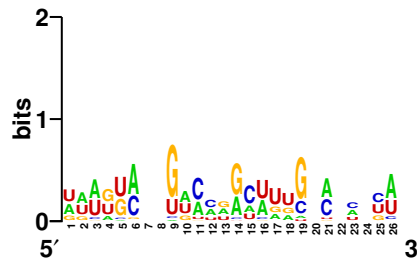

29-mers:

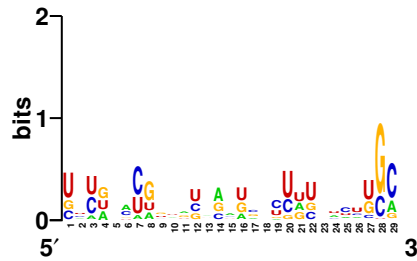

18-mers:

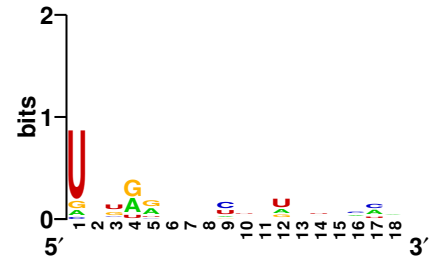

21-mers:

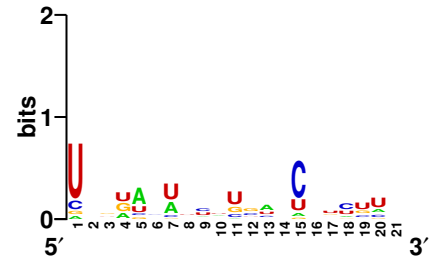

24-mers:

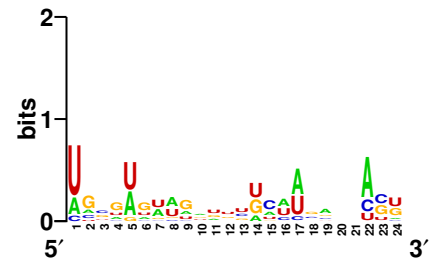

27-mers:

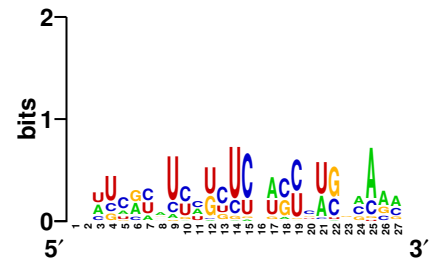

30-mers:

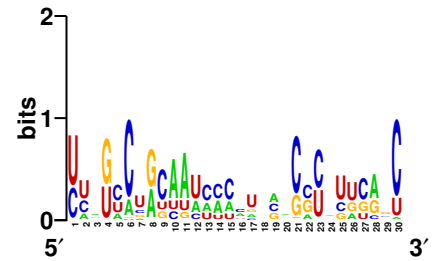

Adult female, library 2:

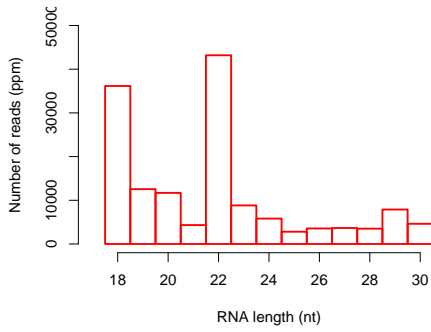

19-mers:

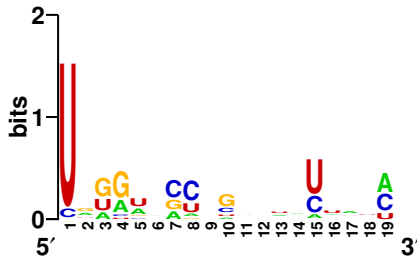

20-mers:

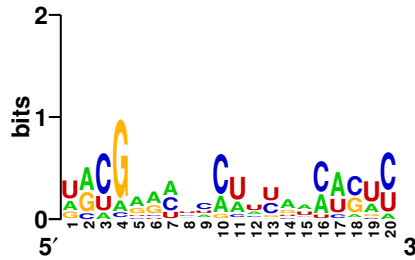

18-mers:

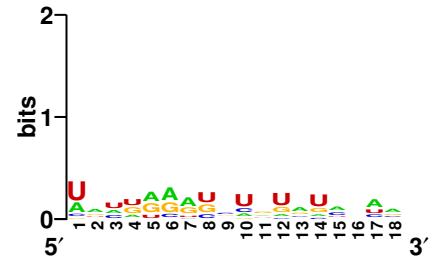

22-mers:

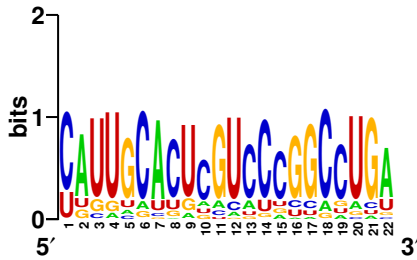

23-mers:

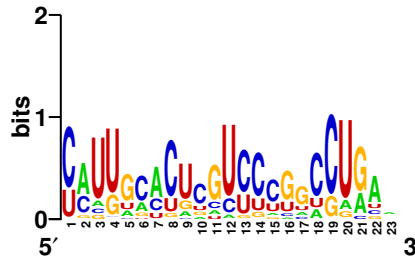

24-mers:

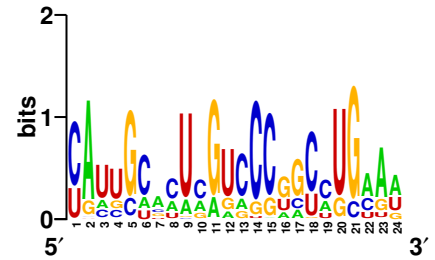

25-mers:

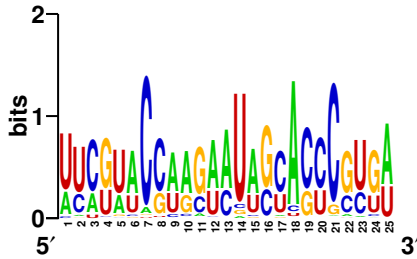

26-mers:

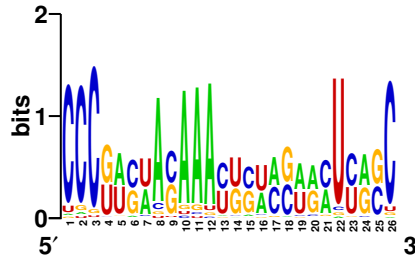

27-mers:

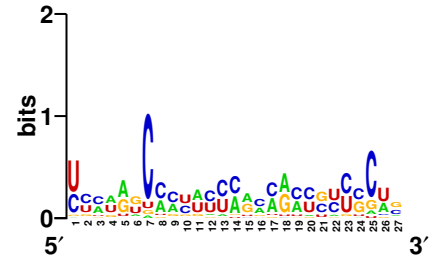

28-mers:

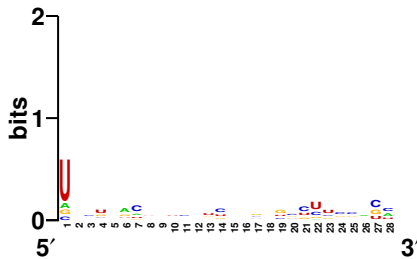

29-mers:

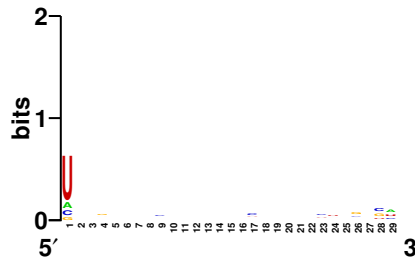

30-mers:

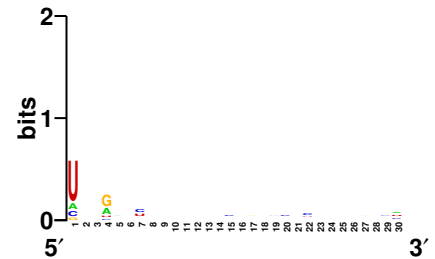

Adult male, library 2:

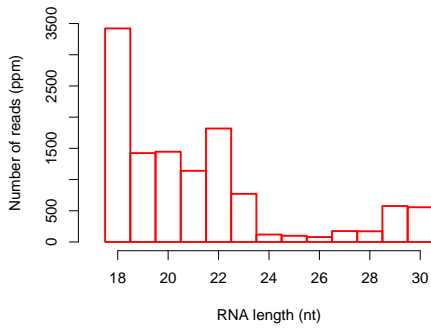

19-mers:

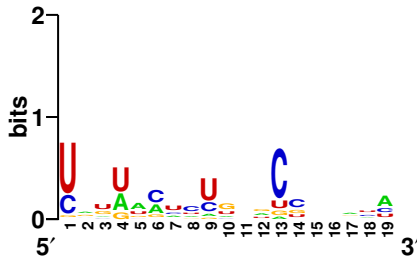

20-mers:

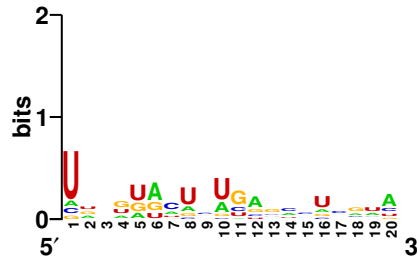

18-mers:

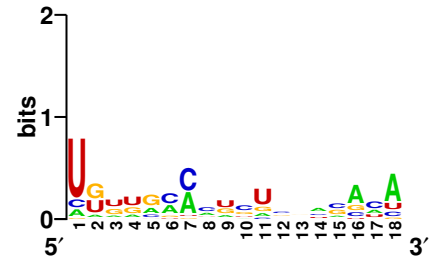

21-mers:

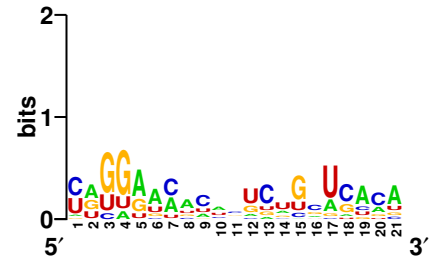

22-mers:

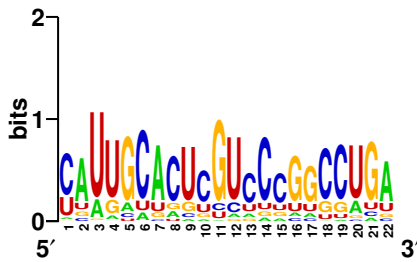

23-mers:

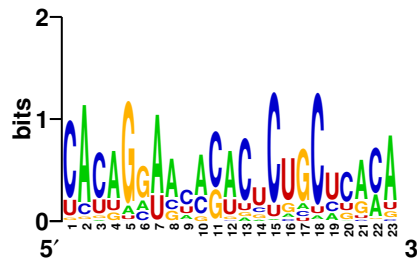

24-mers:

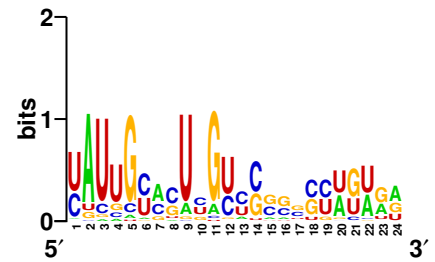

25-mers:

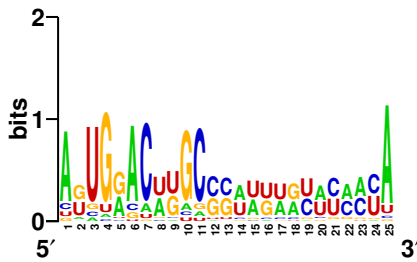

26-mers:

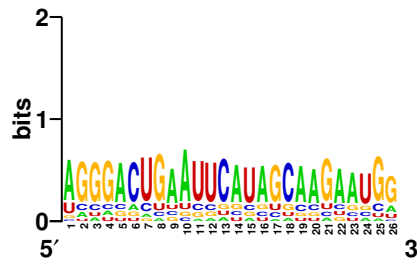

27-mers:

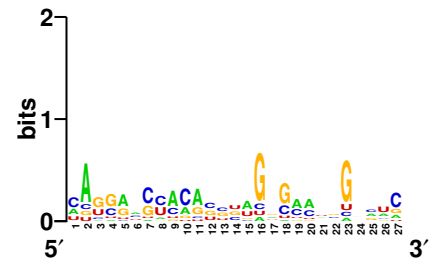

28-mers:

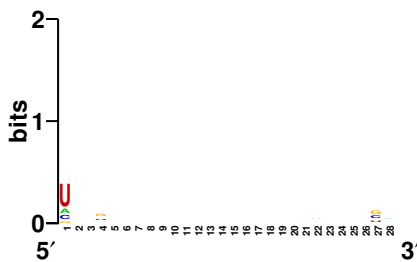

29-mers:

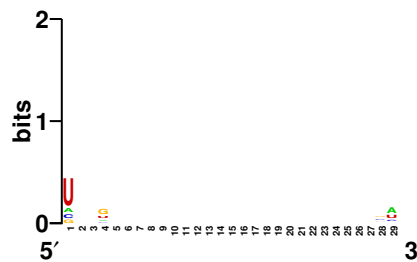

30-mers:

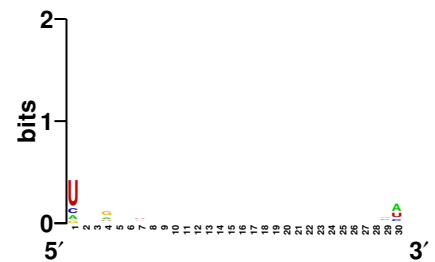

### 1.3 Libraries #3 (total 5' hydroxyl or polyphosphorylated small RNAs)

Embryo 8h, library 3:

18-mers:

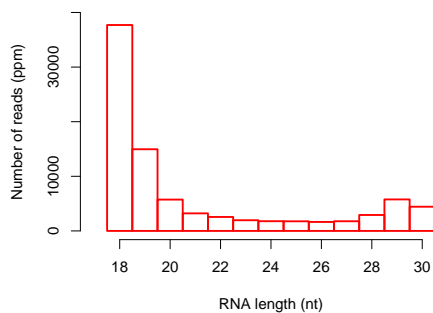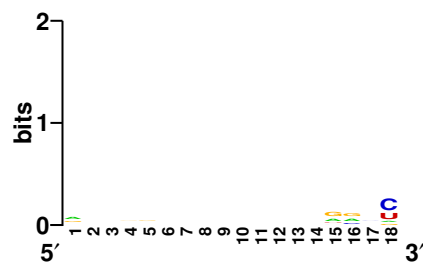

19-mers:

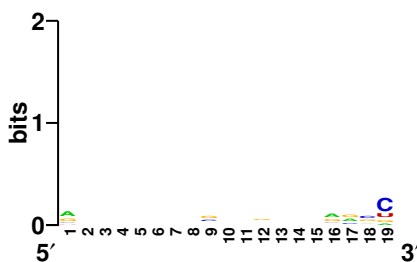

20-mers:

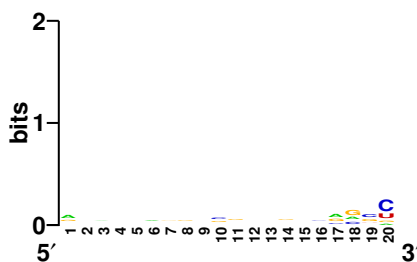

21-mers:

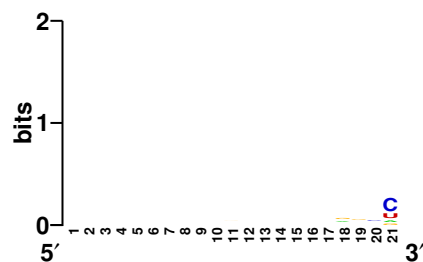

22-mers:

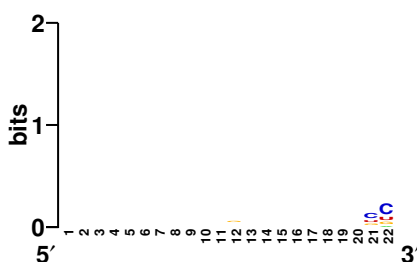

23-mers:

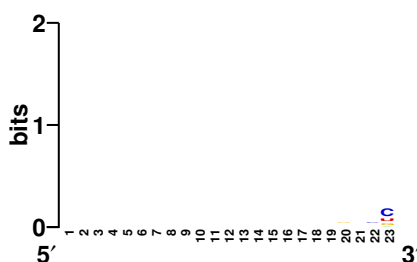

24-mers:

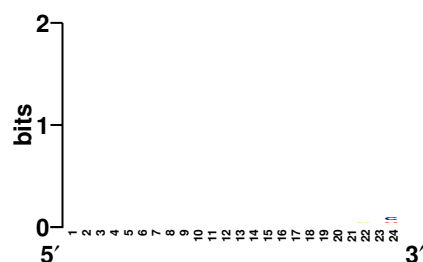

25-mers:

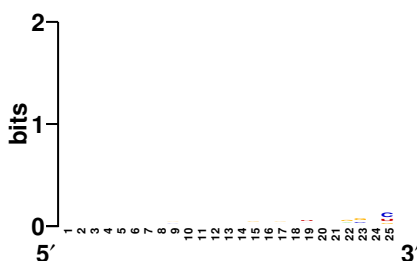

26-mers:

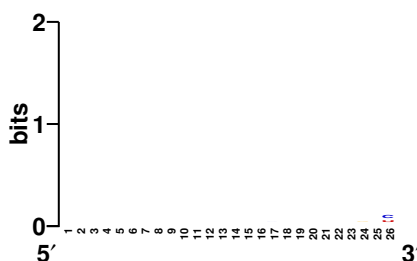

27-mers:

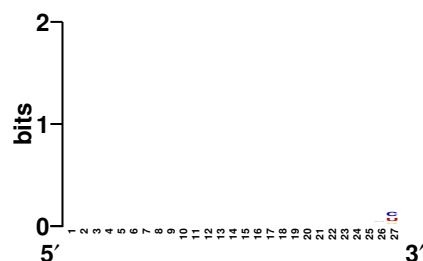

28-mers:

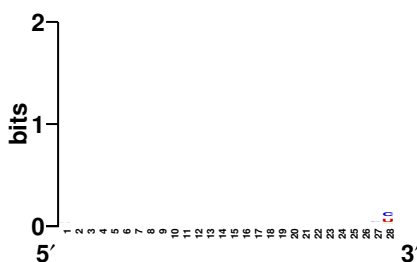

29-mers:

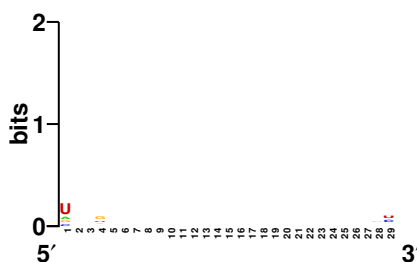

30-mers:

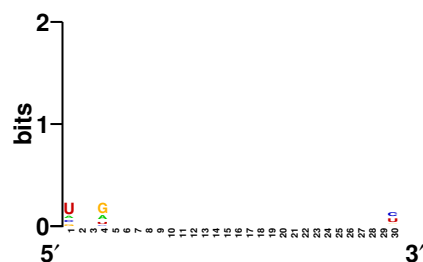

Embryo 15h, library 3:

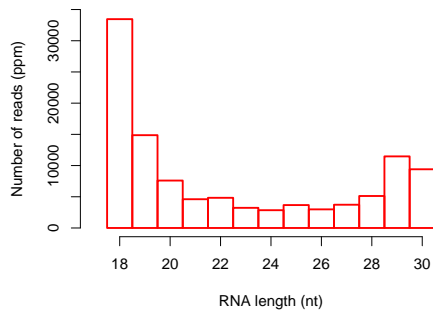

19-mers:

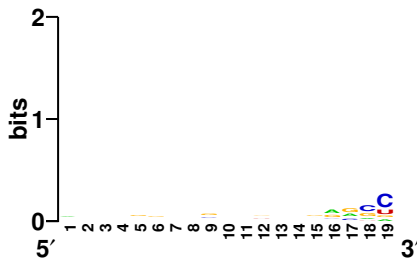

20-mers:

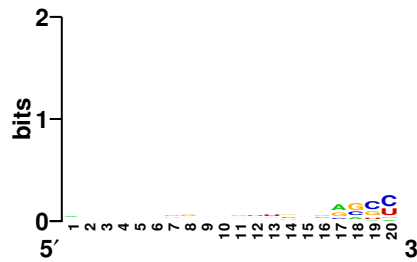

18-mers:

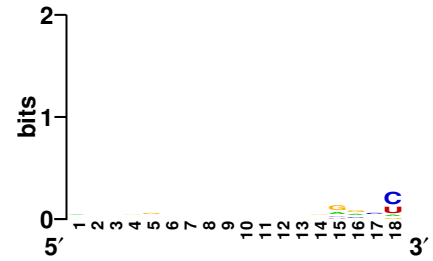

21-mers:

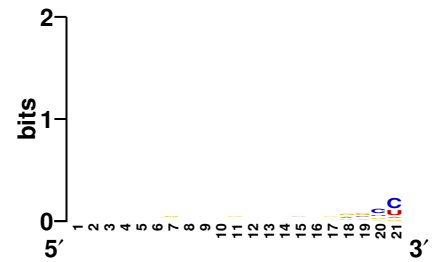

22-mers:

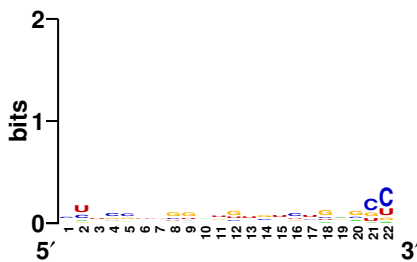

23-mers:

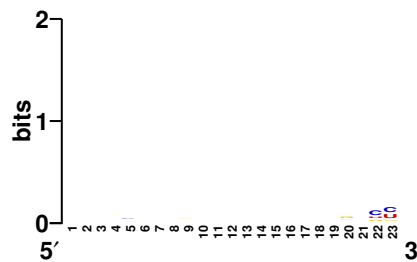

24-mers:

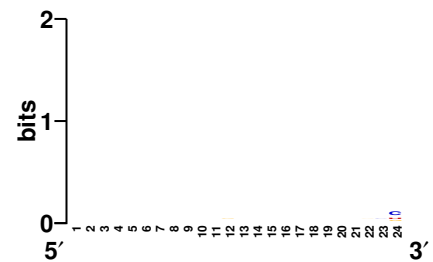

25-mers:

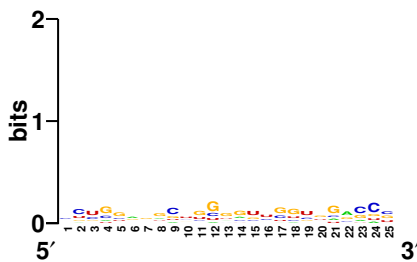

26-mers:

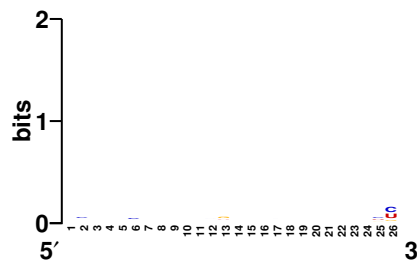

27-mers:

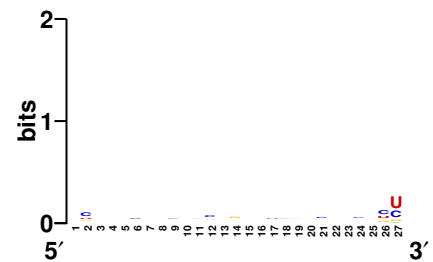

28-mers:

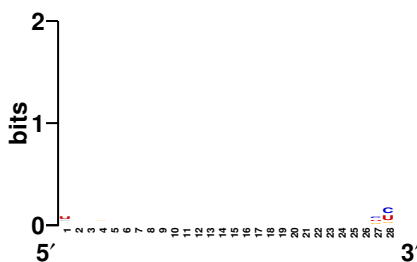

29-mers:

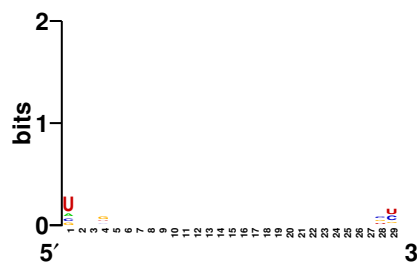

30-mers:

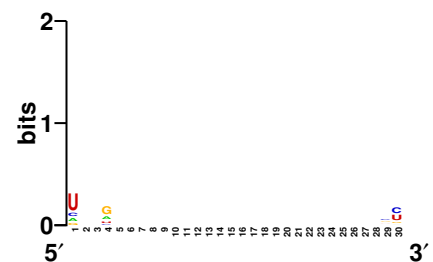



Embryo 36h, library 3:

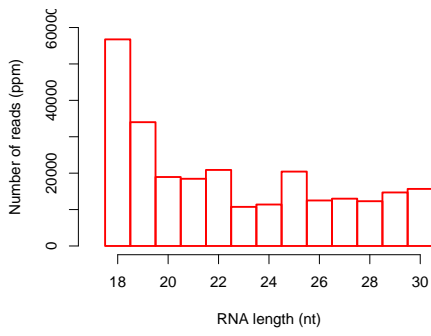

19-mers:

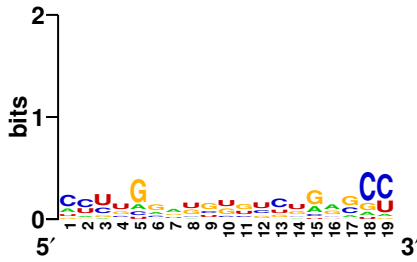

20-mers:

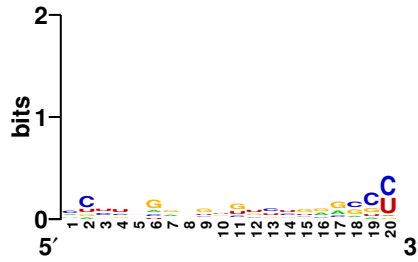

18-mers:

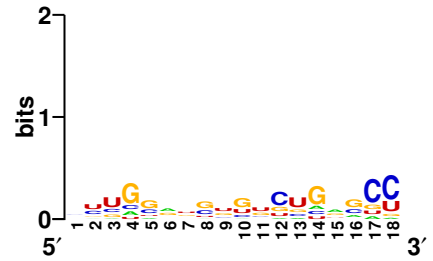

21-mers:

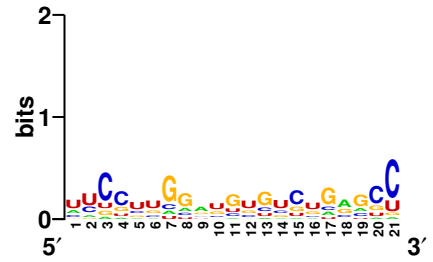

22-mers:

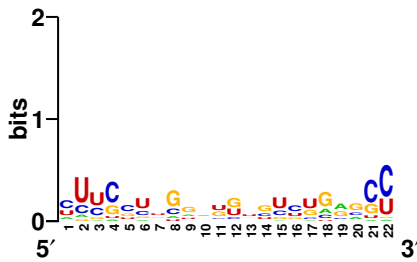

23-mers:

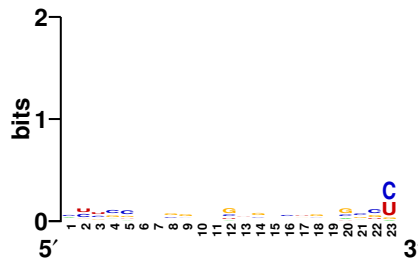

24-mers:

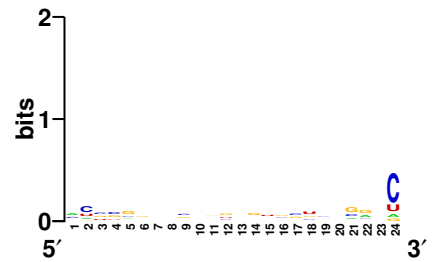

25-mers:

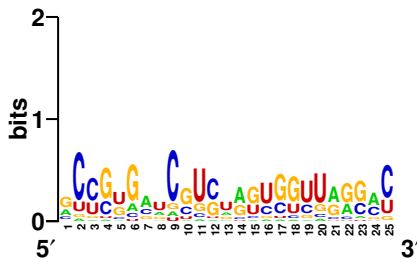

26-mers:

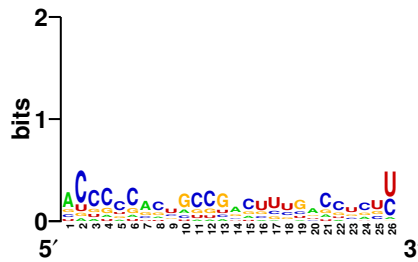

27-mers:

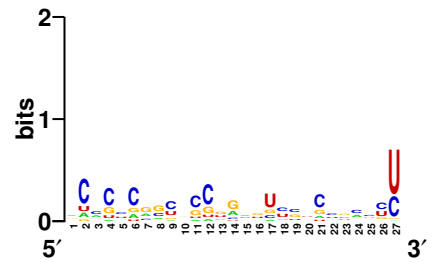

28-mers:

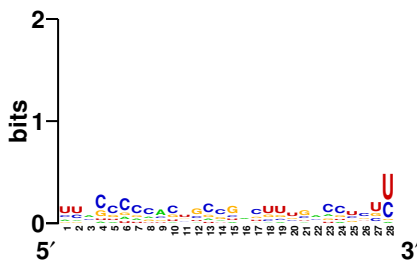

29-mers:

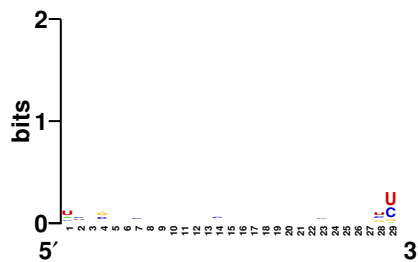

30-mers:

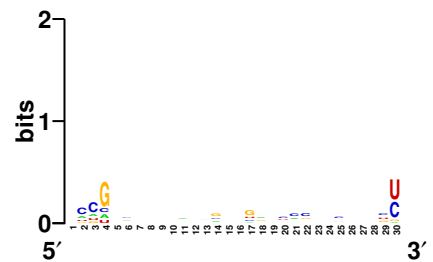

Embryo 60h, library 3:

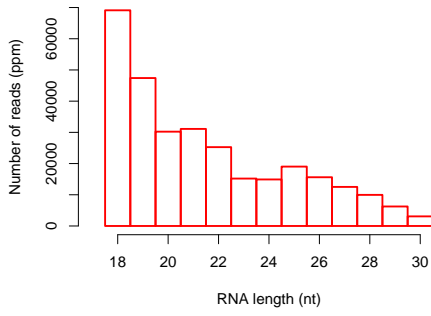

19-mers:

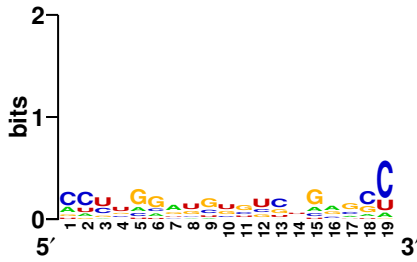

20-mers:

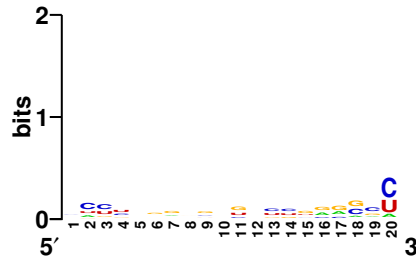

18-mers:

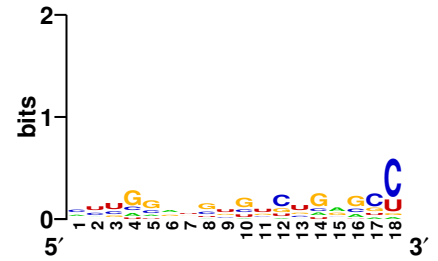

21-mers:

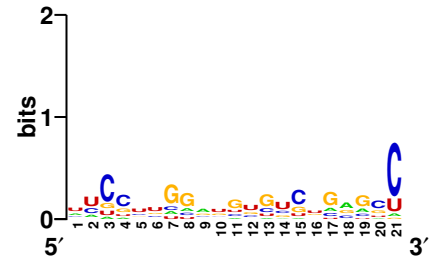

22-mers:

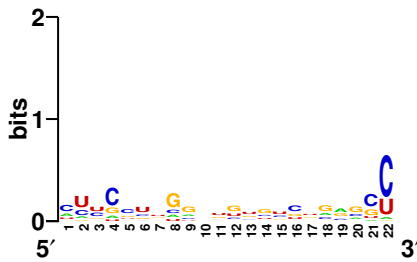

23-mers:

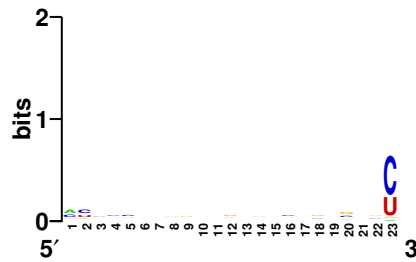

24-mers:

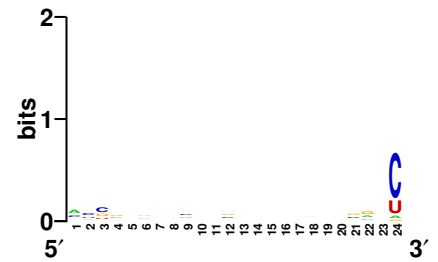

25-mers:

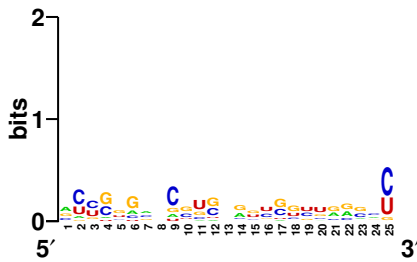

26-mers:

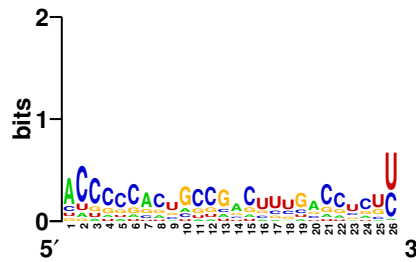

27-mers:

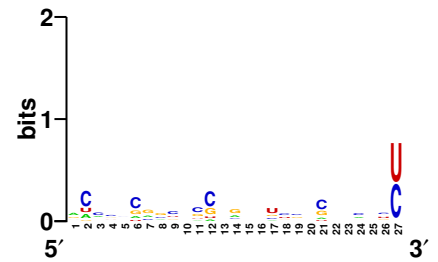

28-mers:

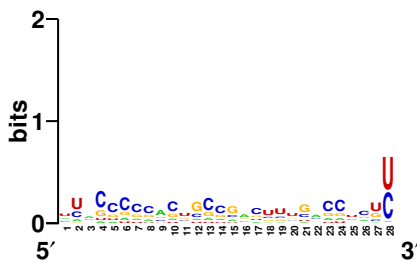

29-mers:

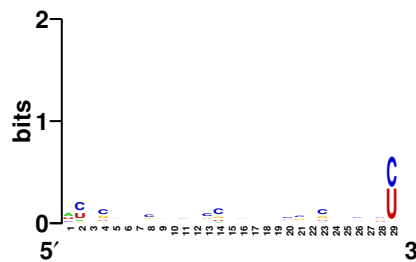

30-mers:

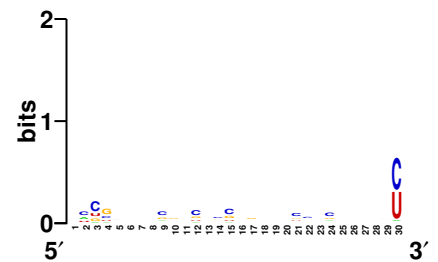

Adult female, library 3:

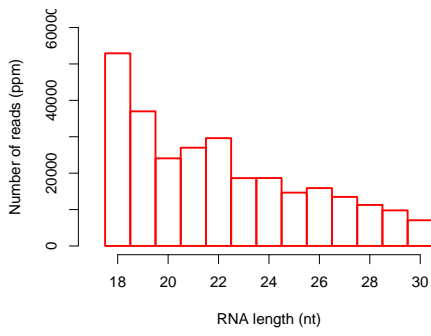

19-mers:

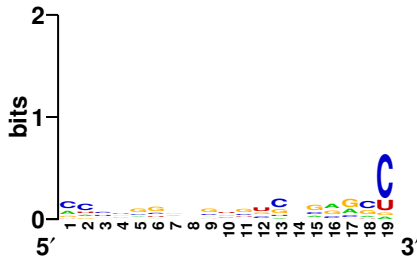

20-mers:

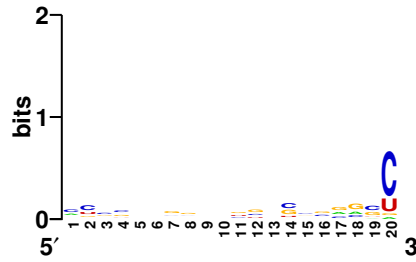

18-mers:

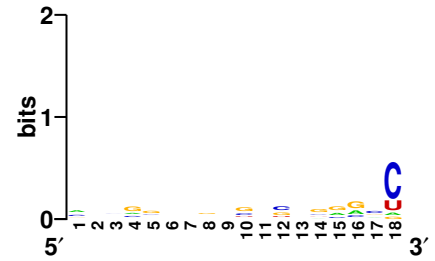

21-mers:

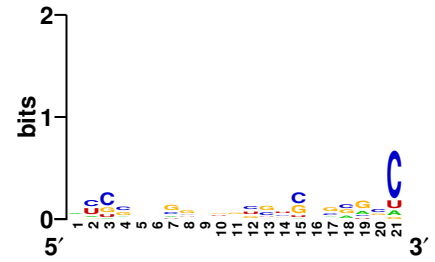

22-mers:

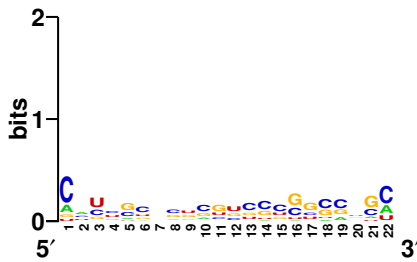

23-mers:

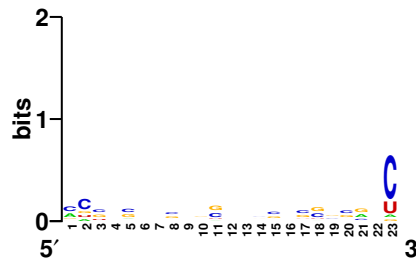

24-mers:

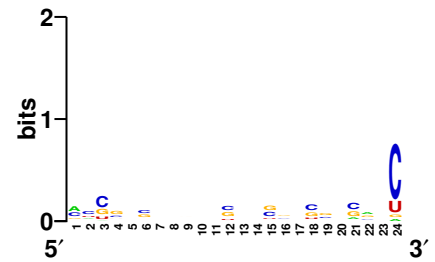

25-mers:

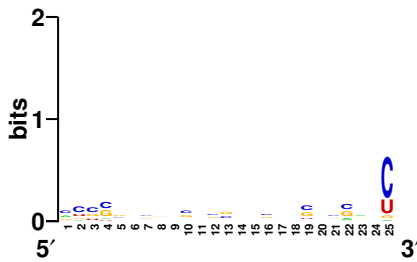

26-mers:

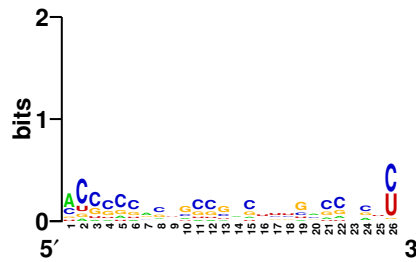

27-mers:

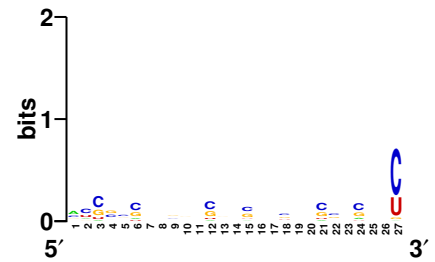

28-mers:

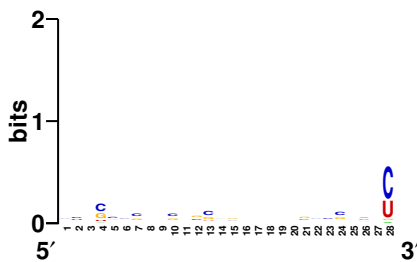

29-mers:

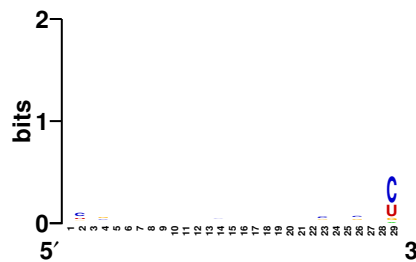

30-mers:

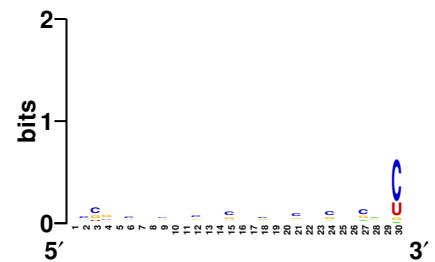

Adult male, library 3:

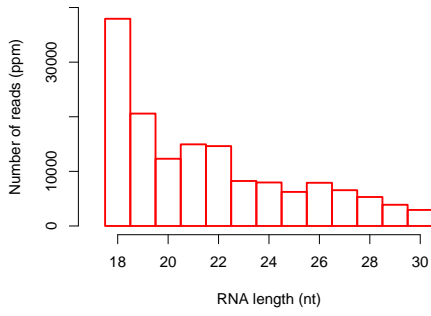

19-mers:

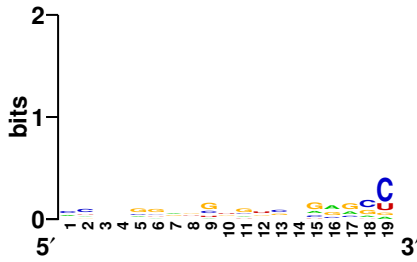

20-mers:

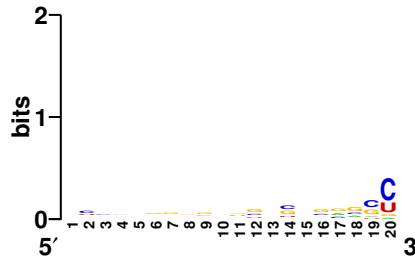

18-mers:

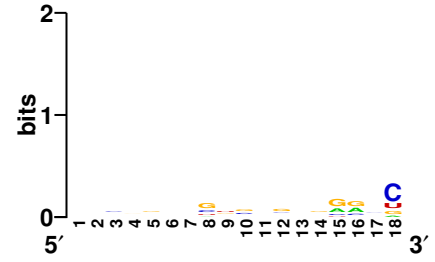

21-mers:

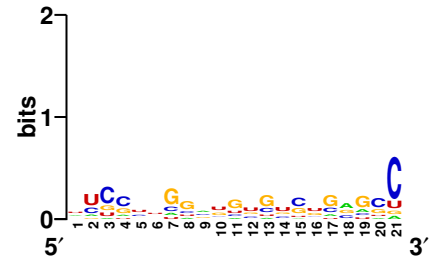

22-mers:

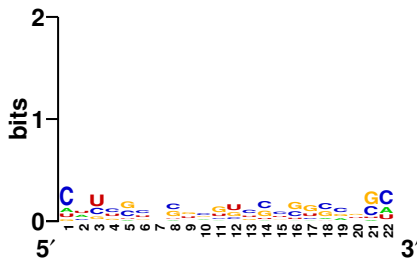

23-mers:

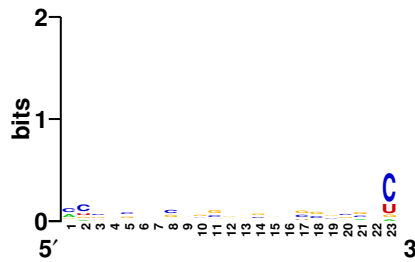

24-mers:

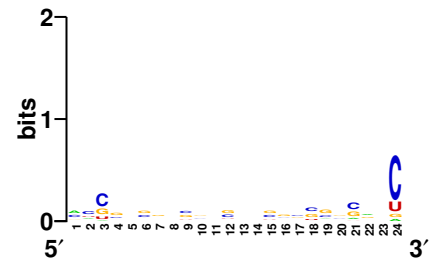

25-mers:

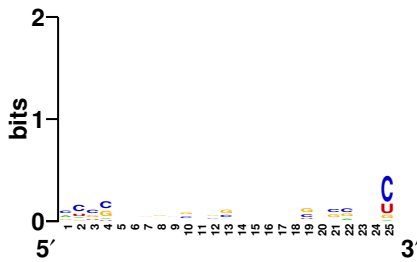

26-mers:

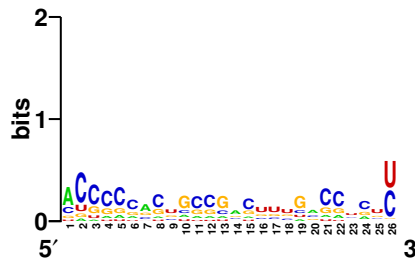

27-mers:

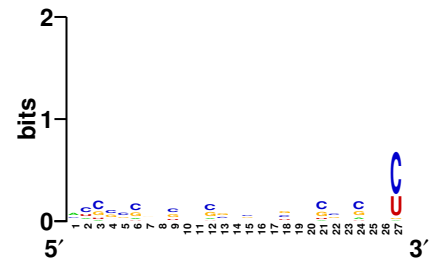

28-mers:

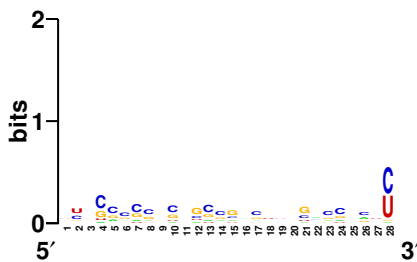

29-mers:

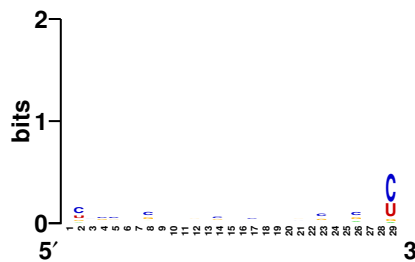

30-mers:

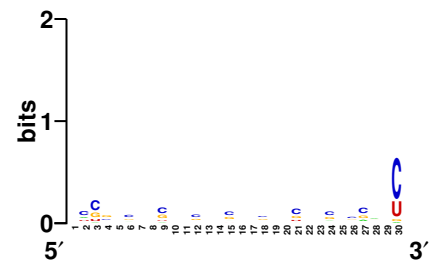

# 1.4 Libraries #4 (3' modified, 5' hydroxyl or polyphosphorylated small RNAs)

Embryo 8h, library 4:

18-mers:

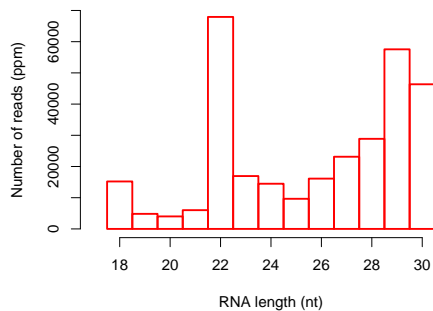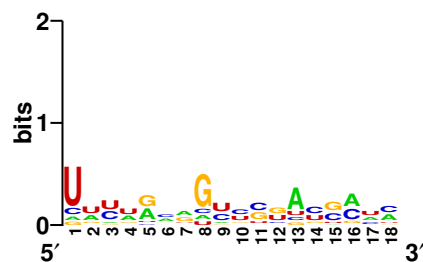

19-mers:

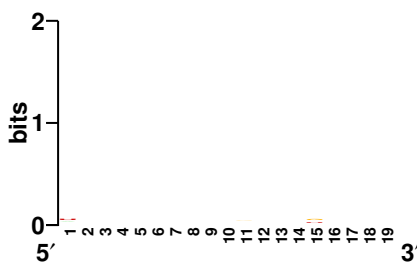

20-mers:

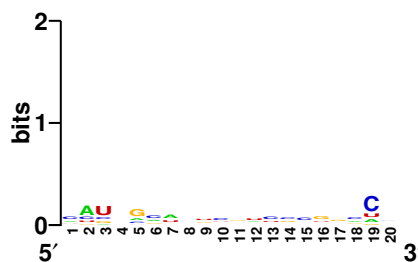

21-mers:

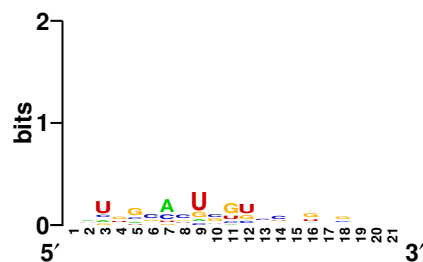

22-mers:

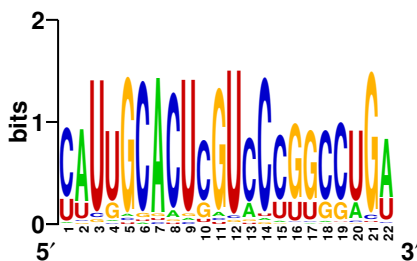

23-mers:

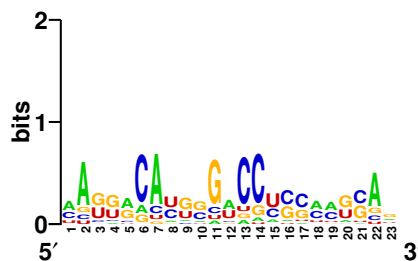

24-mers:

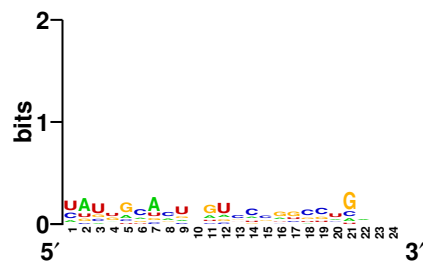

25-mers:

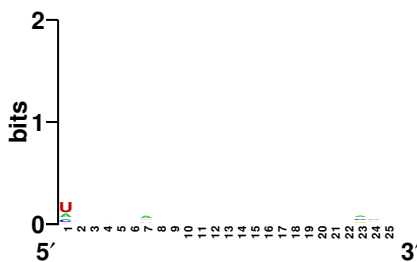

26-mers:

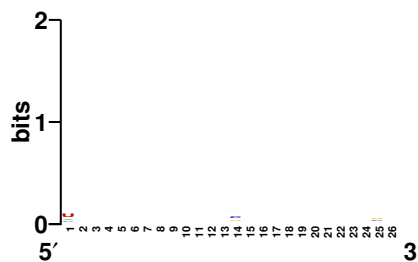

27-mers:

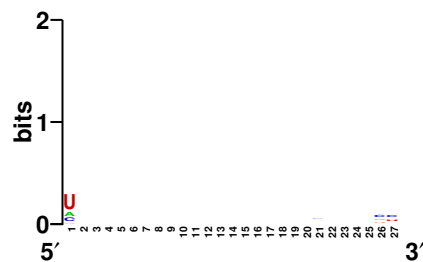

28-mers:

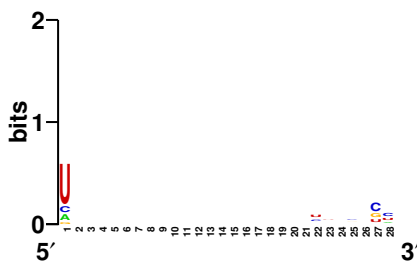

29-mers:

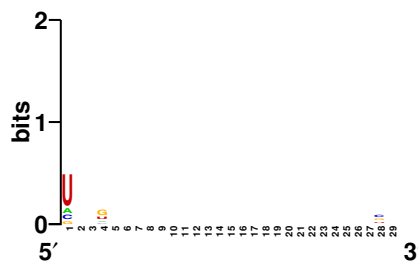

30-mers:

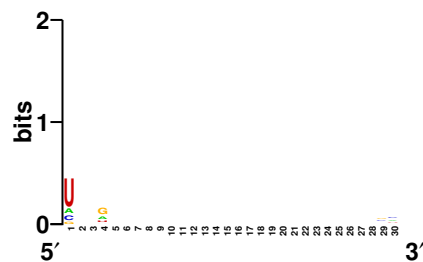

Embryo 15h, library 4:

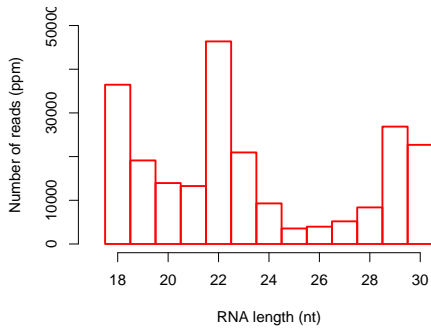

19-mers:

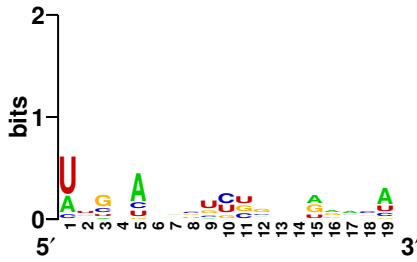

20-mers:

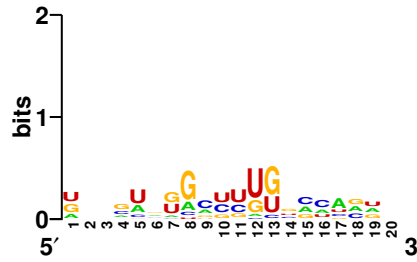

18-mers:

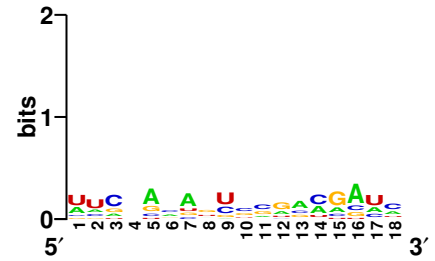

21-mers:

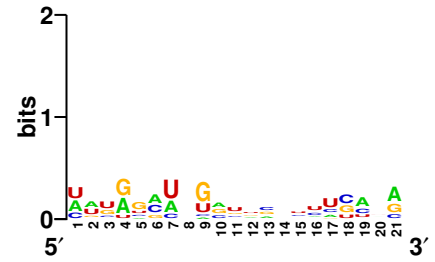

22-mers:

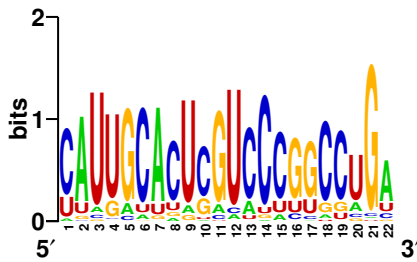

23-mers:

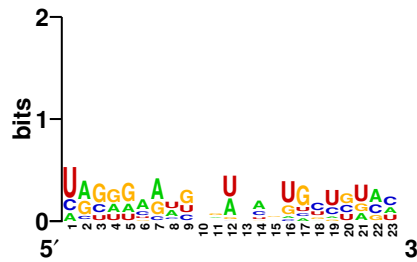

24-mers:

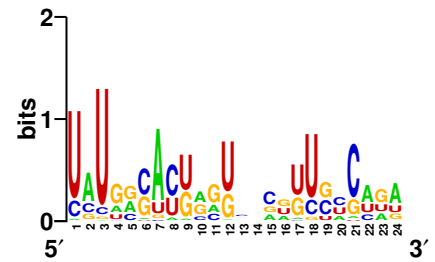

25-mers:

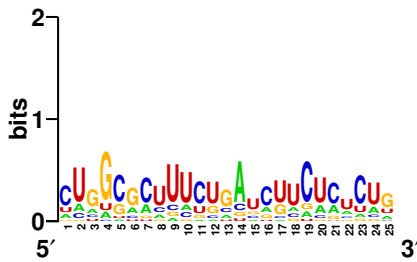

26-mers:

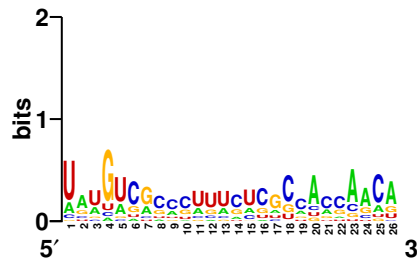

27-mers:

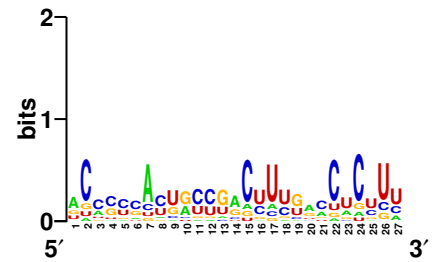

28-mers:

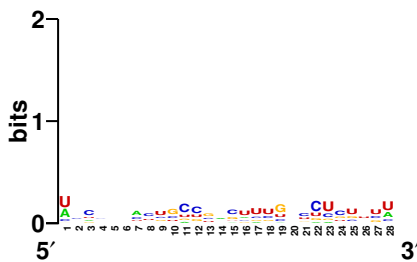

29-mers:

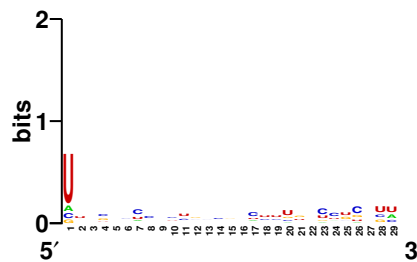

30-mers:

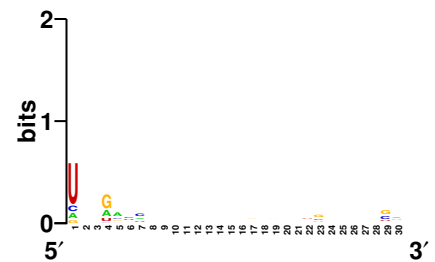

Embryo 36h, library 4:

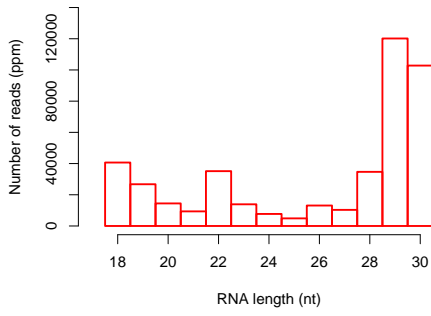

18-mers:

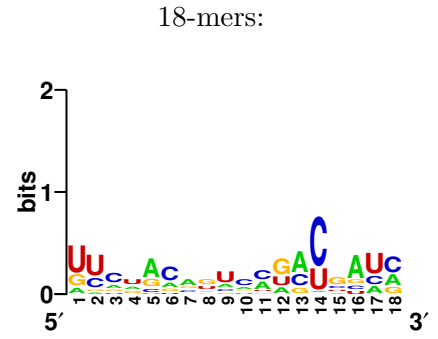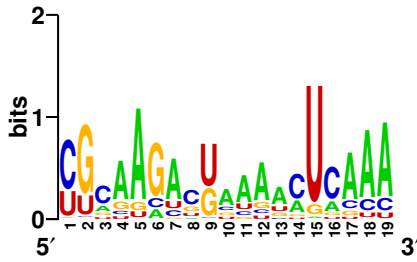

20-mers:

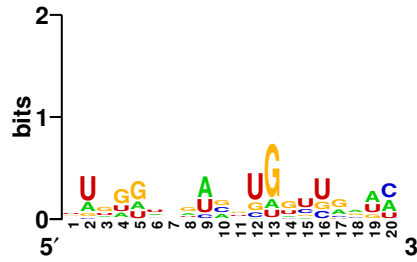

21-mers:

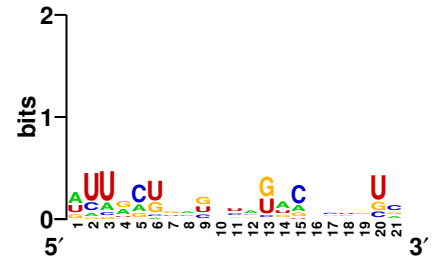

22-mers:

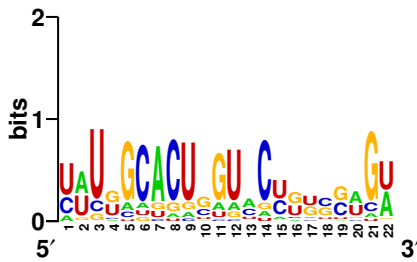

23-mers:

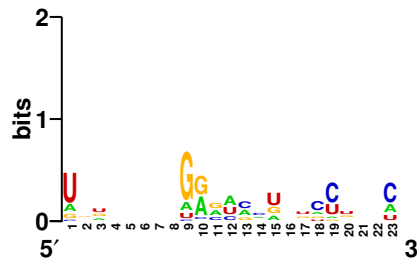

24-mers:

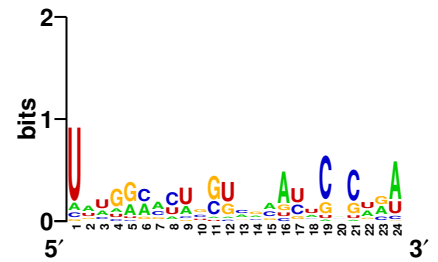

25-mers:

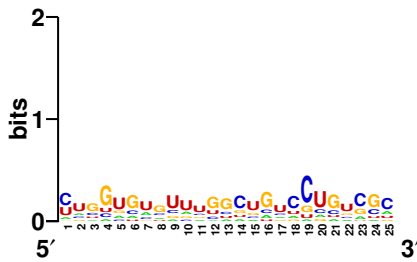

26-mers:

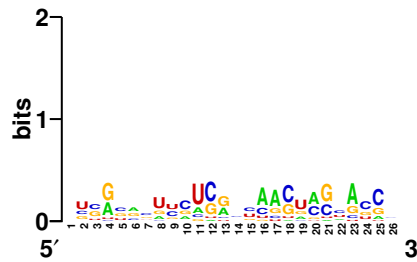

27-mers:

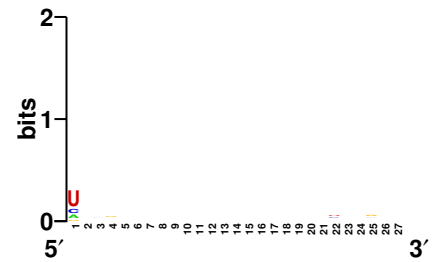

28-mers:

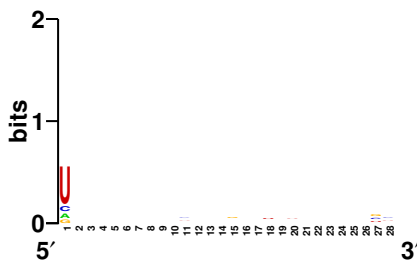

29-mers:

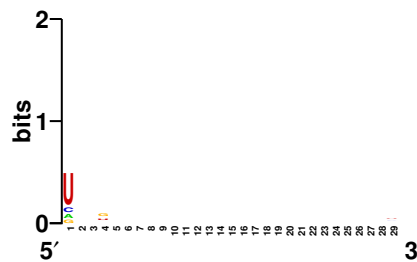

30-mers:

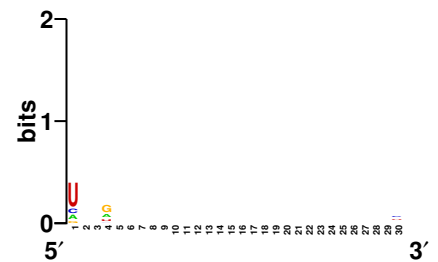

Embryo 60h, library 4:

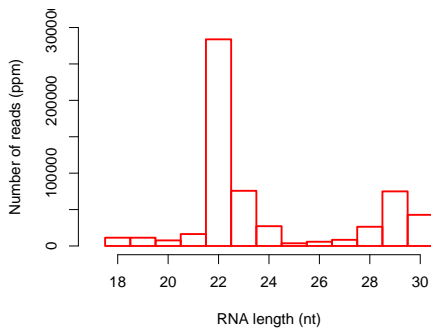

19-mers:

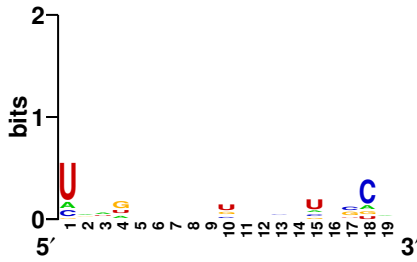

20-mers:

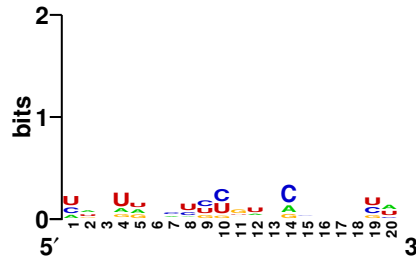

18-mers:

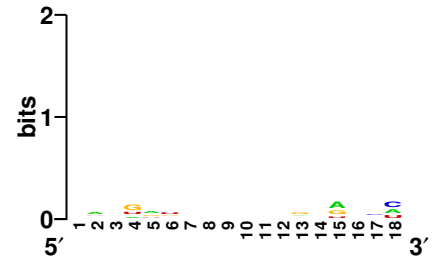

21-mers:

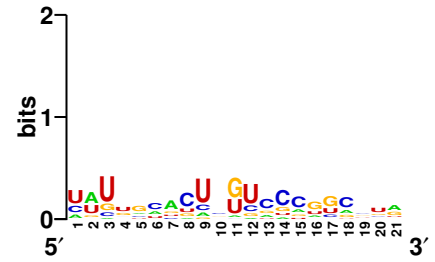

22-mers:

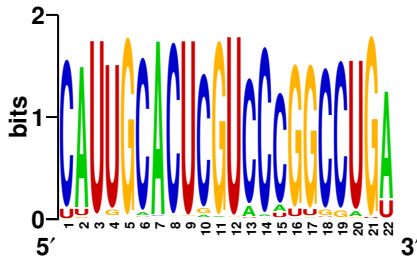

23-mers:

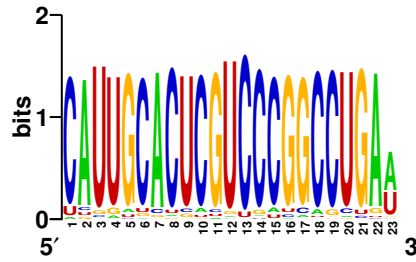

24-mers:

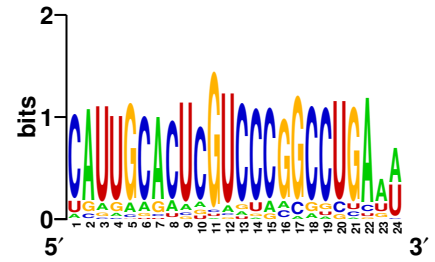

25-mers:

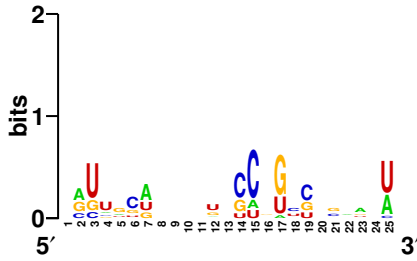

26-mers:

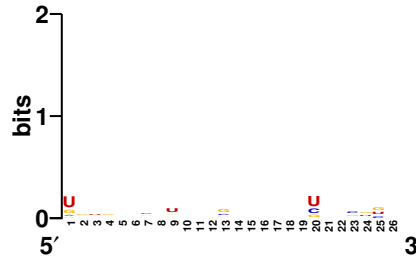

27-mers:

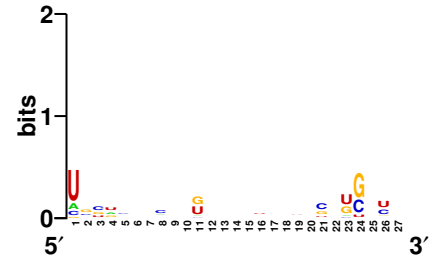

28-mers:

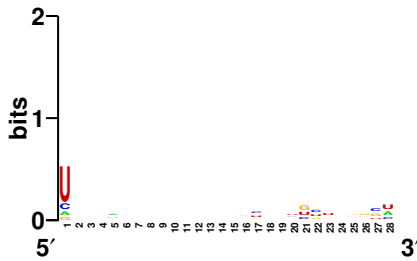

29-mers:

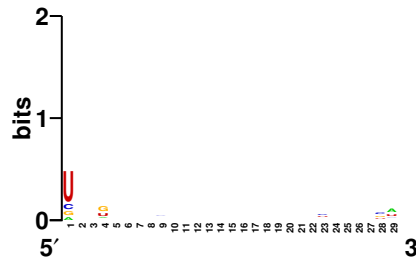

30-mers:

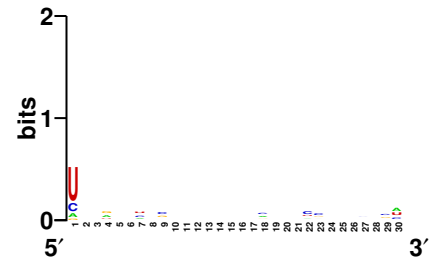



Adult female, library 4:

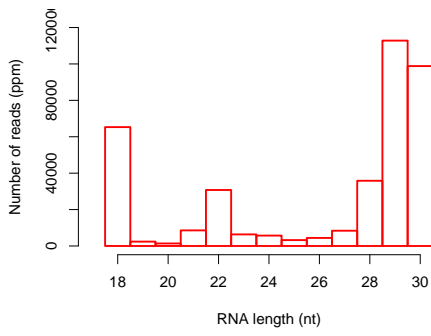

19-mers:

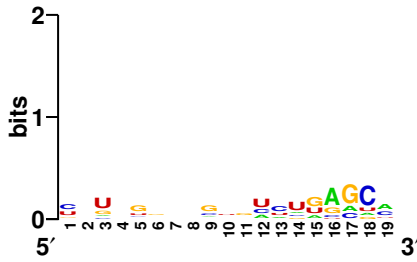

20-mers:

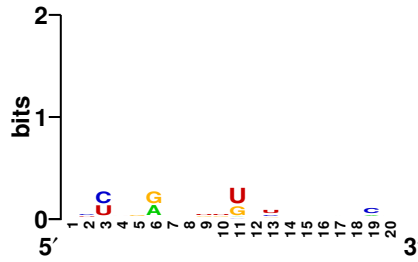

18-mers:

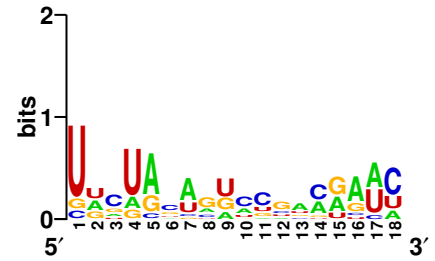

21-mers:

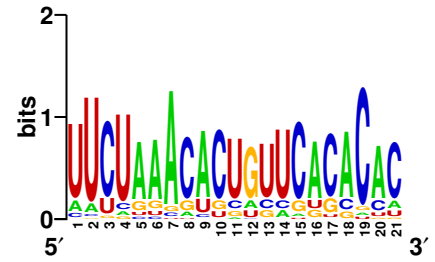

22-mers:

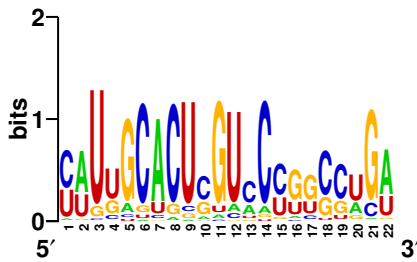

23-mers:

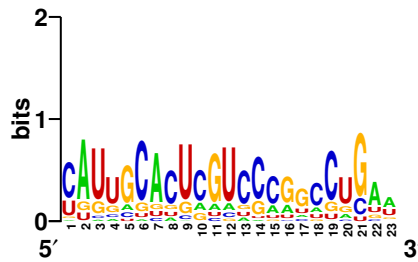

24-mers:

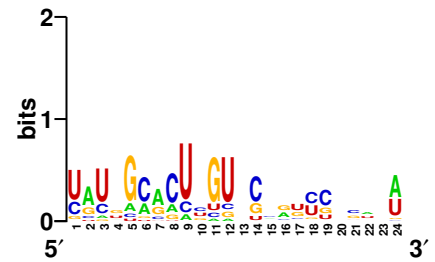

25-mers:

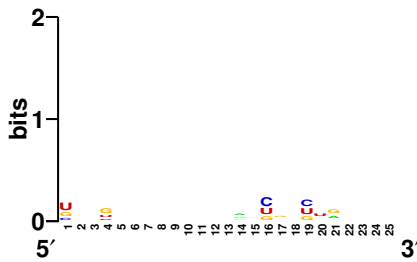

26-mers:

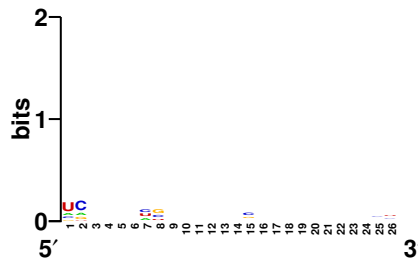

27-mers:

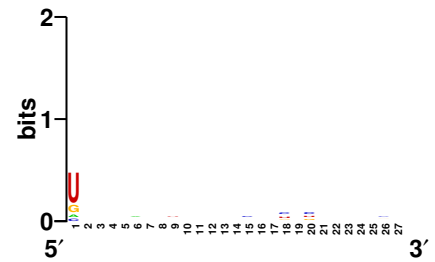

28-mers:

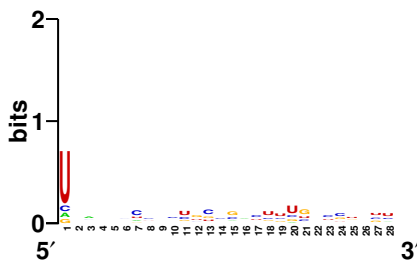

29-mers:

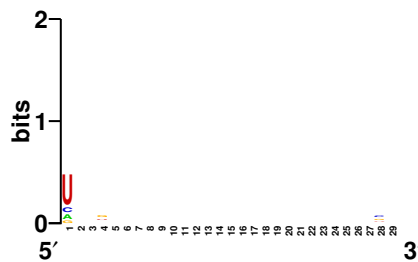

30-mers:

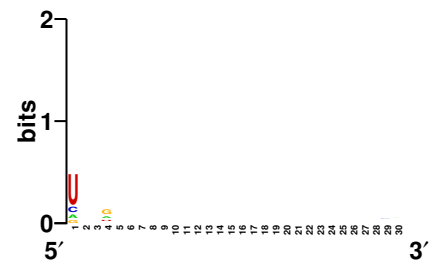

Adult male, library 4:

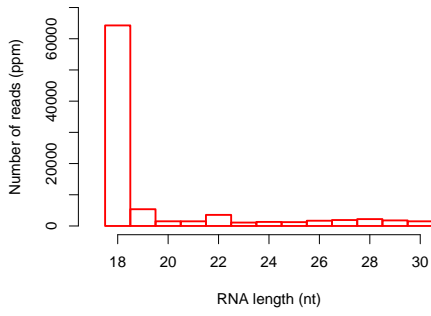

19-mers:

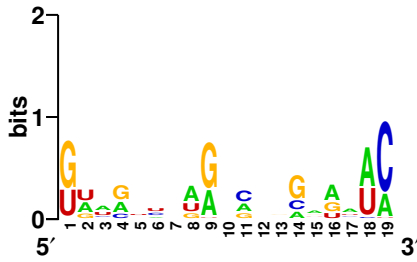

20-mers:

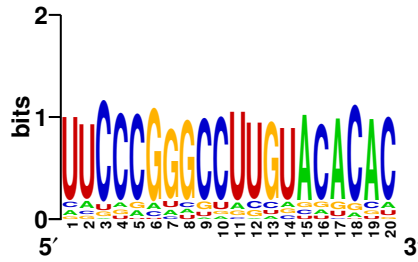

18-mers:

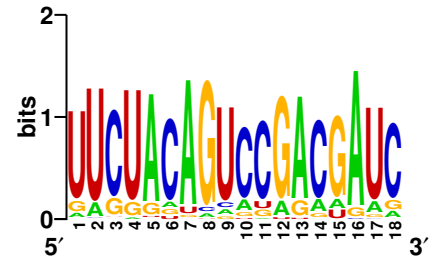

21-mers:

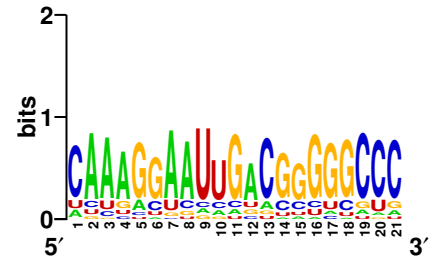

22-mers:

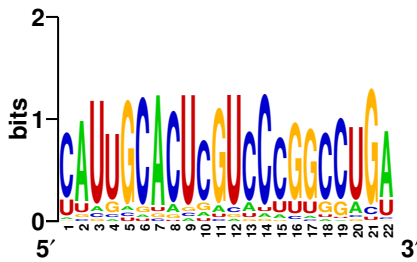

23-mers:

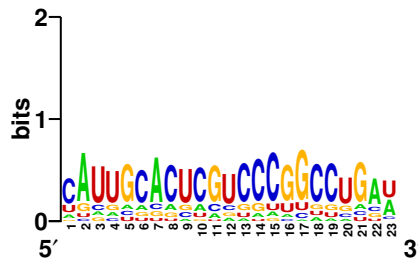

24-mers:

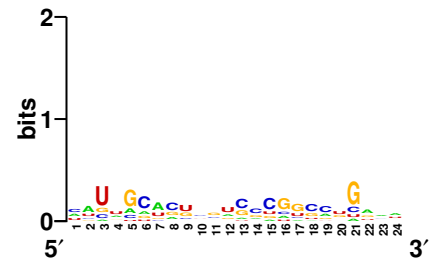

25-mers:

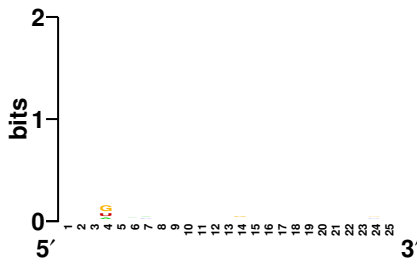

26-mers:

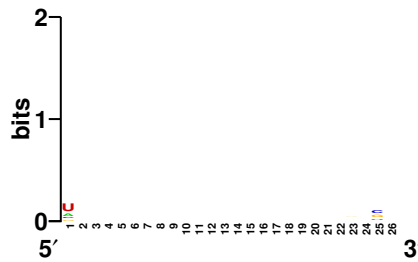

27-mers:

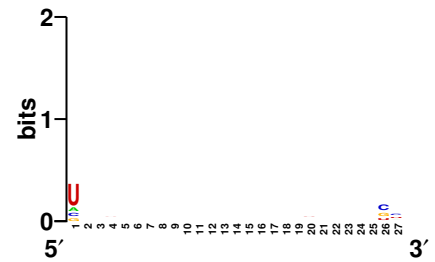

28-mers:

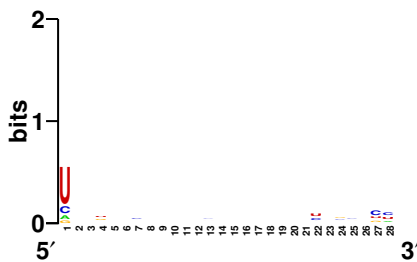

29-mers:

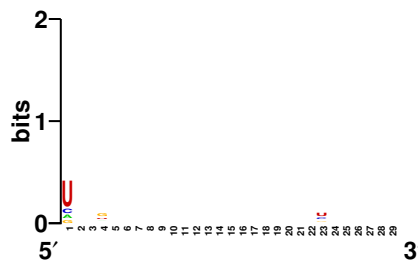

30-mers:

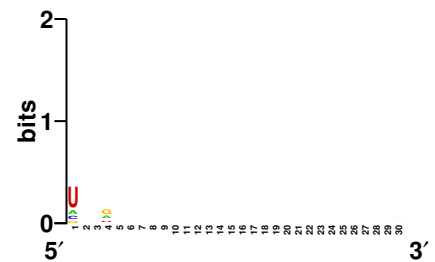

## 2 pre-miRNA hairpin-matching reads

### 2.1 Libraries #1 (total 5' monophosphorylated small RNAs)

Embryo 8h, library 1:

Sense reads:

18-mers:

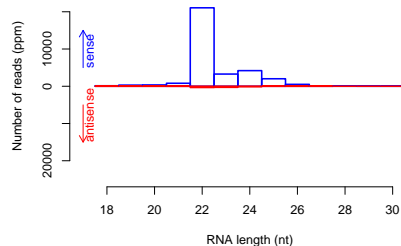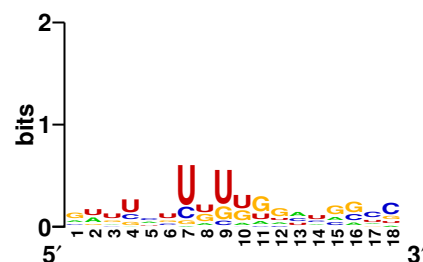

19-mers:

20-mers:

21-mers:

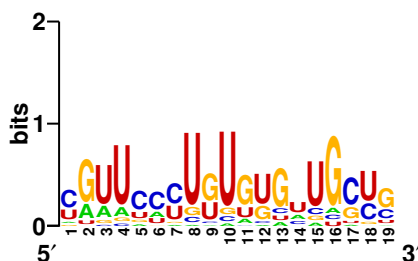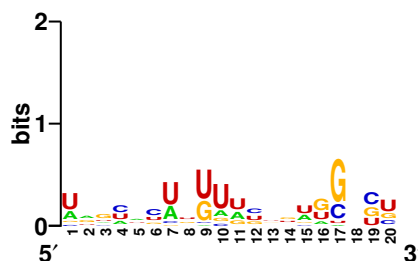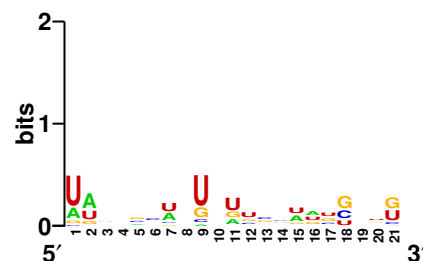

22-mers:

23-mers:

24-mers:

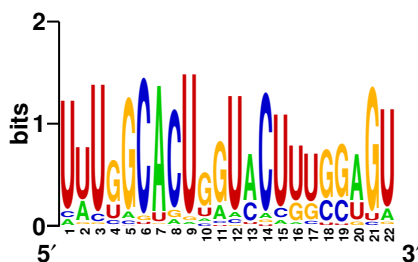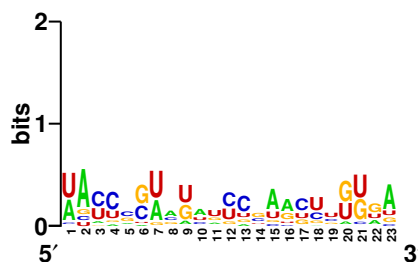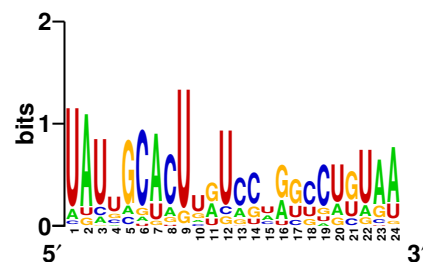

25-mers:

26-mers:

27-mers:

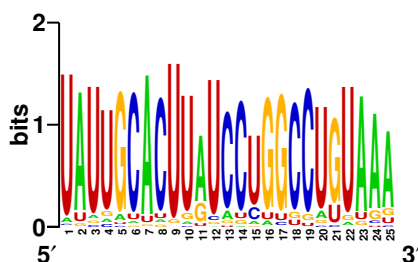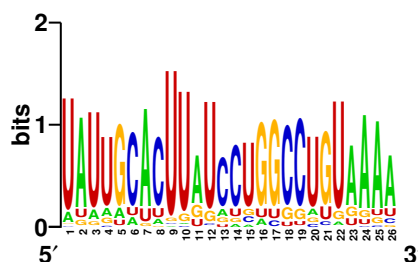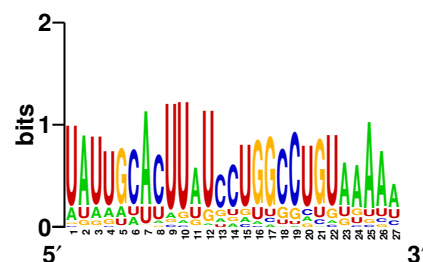

28-mers:

29-mers:

30-mers:

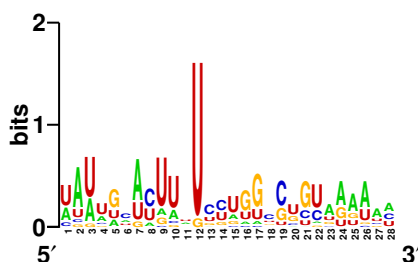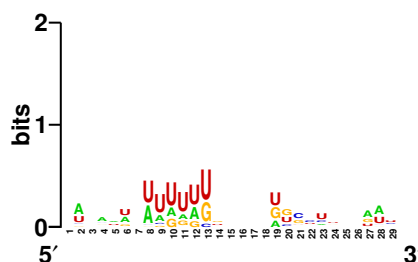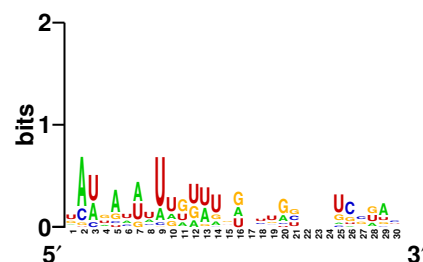

Antisense reads:

18-mers:

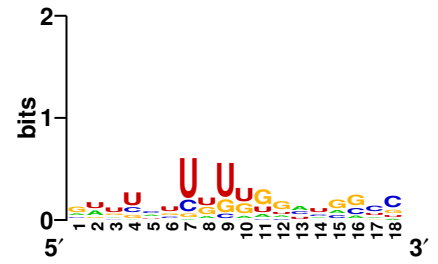

19-mers:

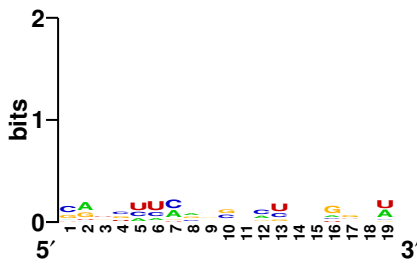

20-mers:

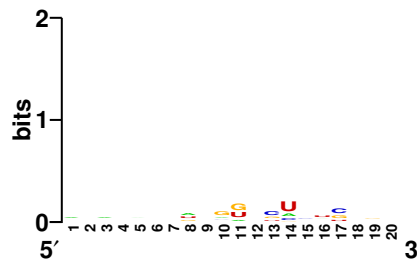

21-mers:

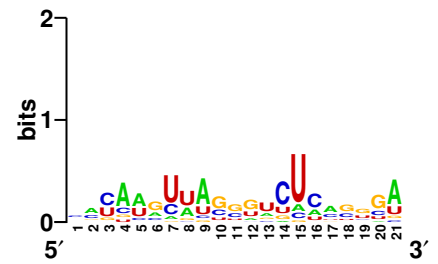

22-mers:

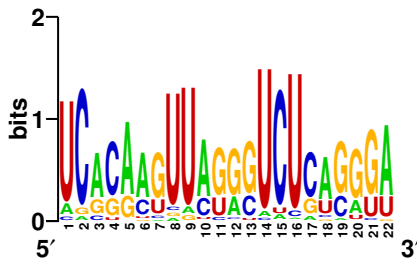

23-mers:

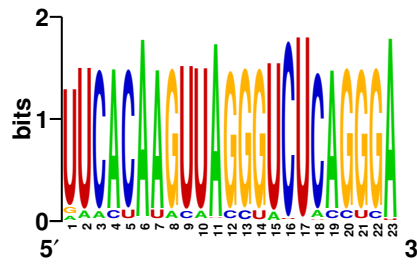

24-mers:

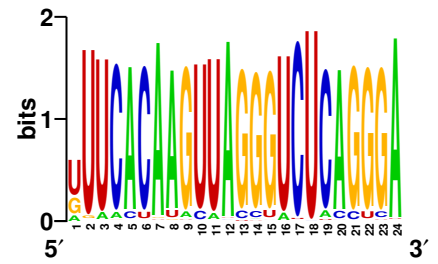

25-mers:

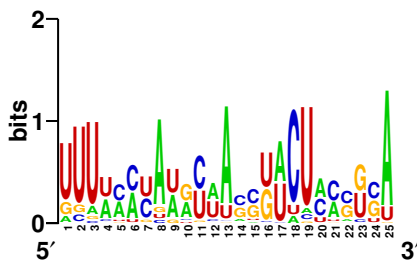

26-mers:

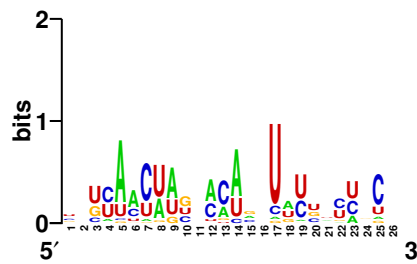

27-mers:

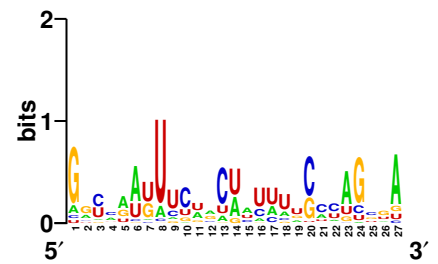

28-mers:

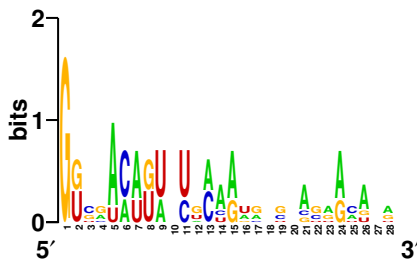

29-mers:

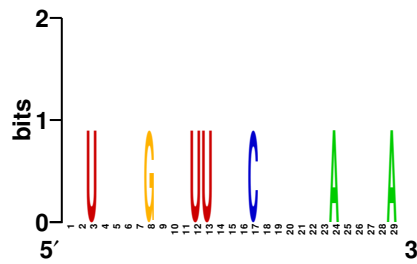

30-mers:

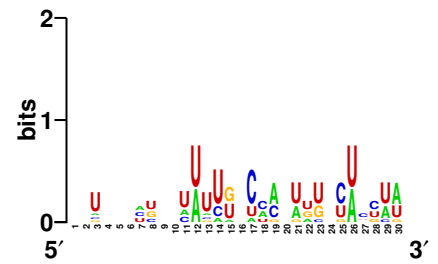

Embryo 15h, library 1:

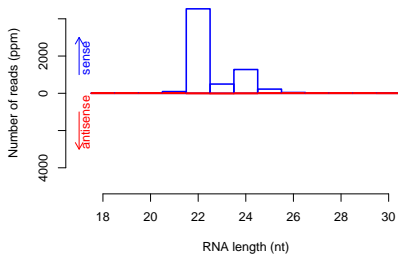

Sense reads:

18-mers:

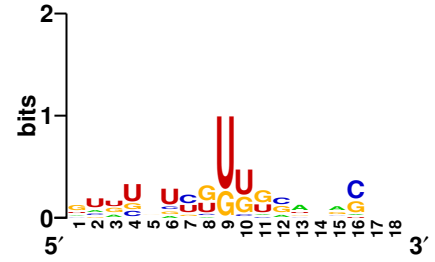

19-mers:

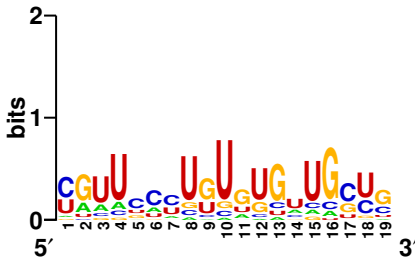

20-mers:

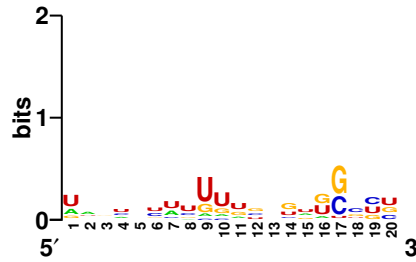

21-mers:

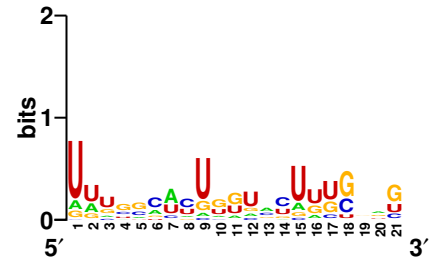

22-mers:

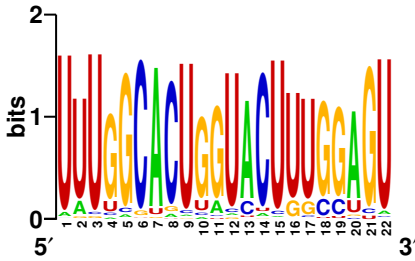

23-mers:

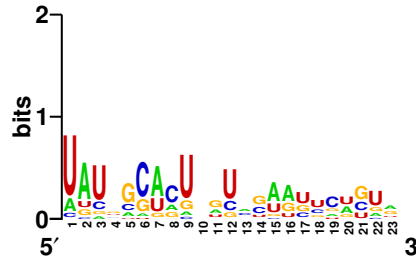

24-mers:

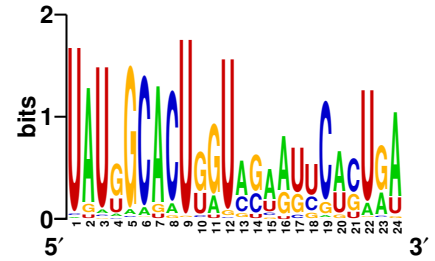

25-mers:

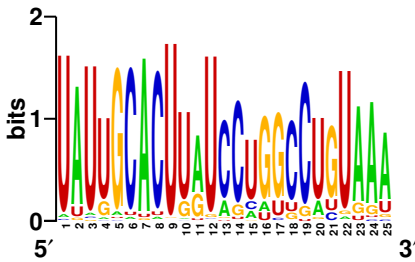

26-mers:

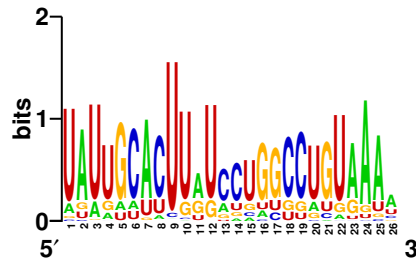

27-mers:

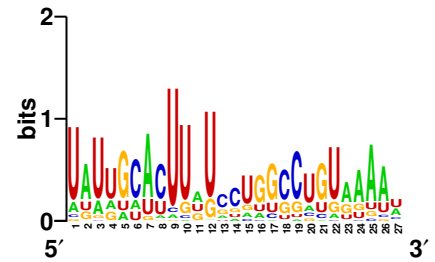

28-mers:

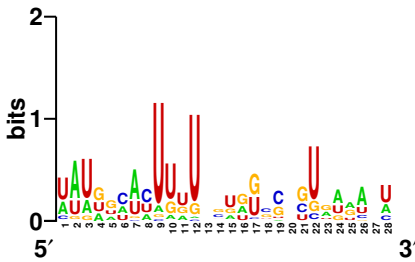

29-mers:

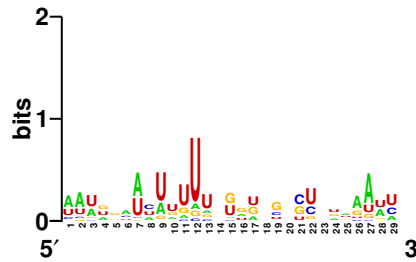

30-mers:

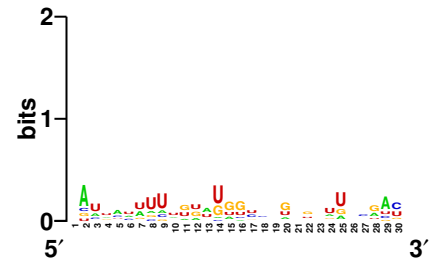

Antisense reads:

18-mers:

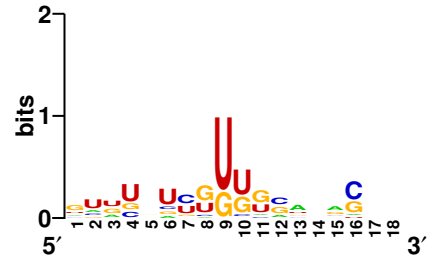

19-mers:

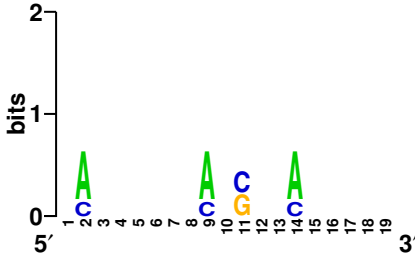

20-mers:

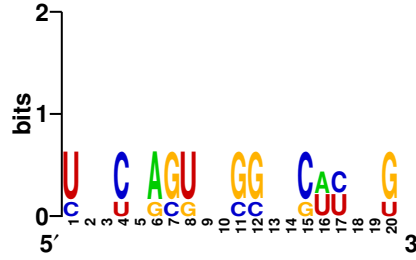

21-mers:

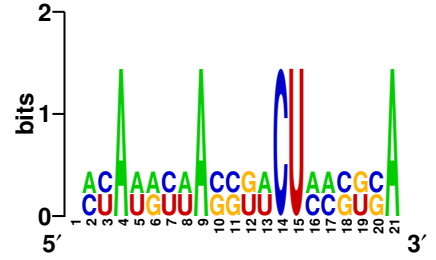

22-mers:

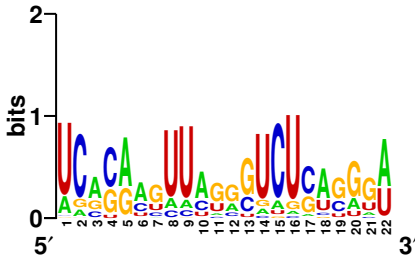

23-mers:

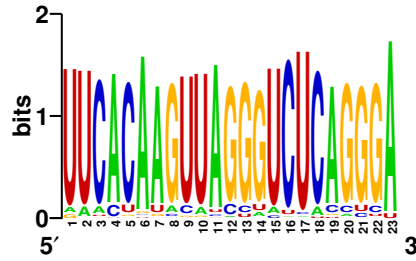

24-mers:

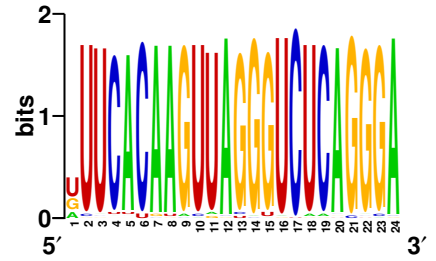

25-mers:

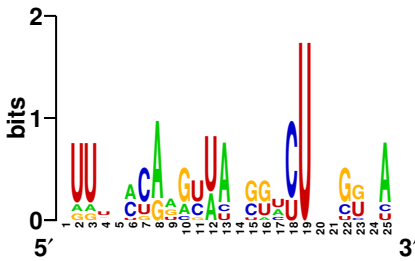

26-mers:

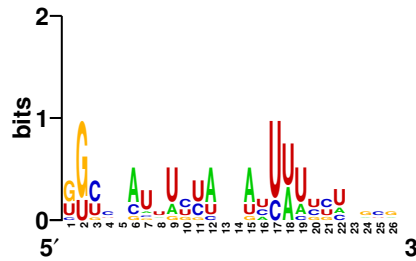

27-mers:

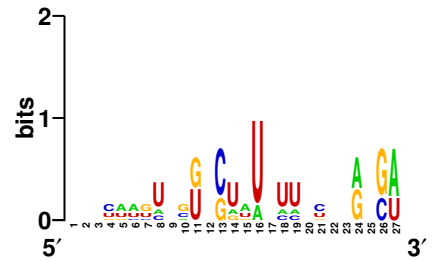

28-mers:

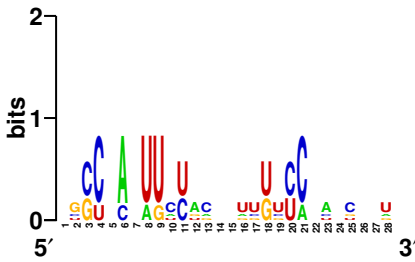

29-mers:

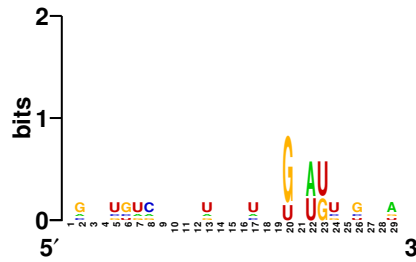

30-mers:

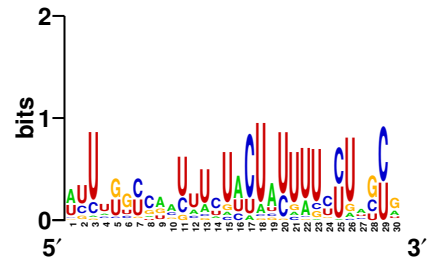

Embryo 36h, library 1:

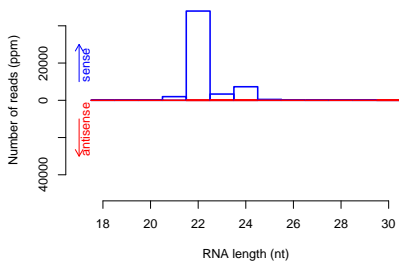

Sense reads:

18-mers:

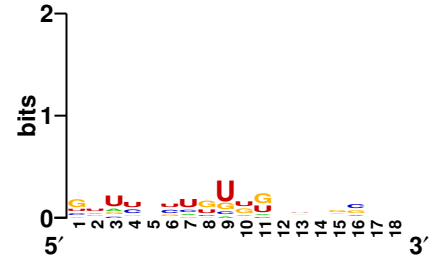

19-mers:

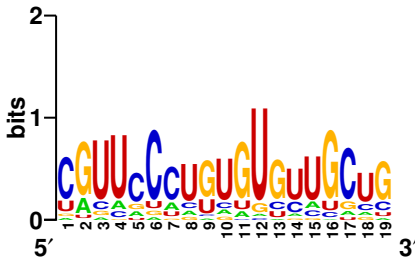

20-mers:

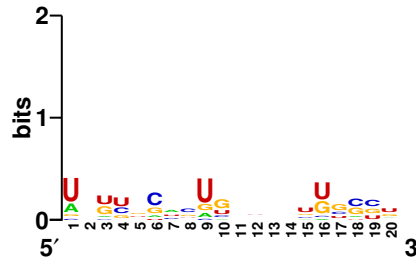

21-mers:

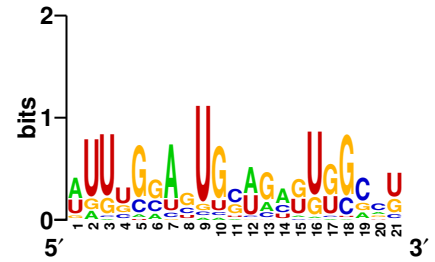

22-mers:

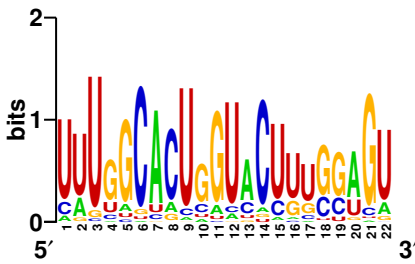

23-mers:

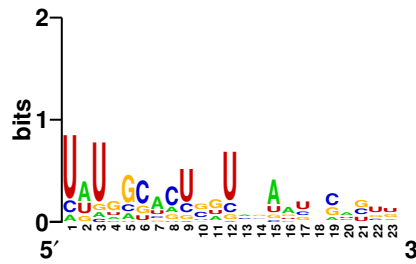

24-mers:

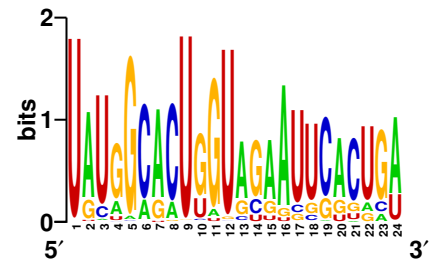

25-mers:

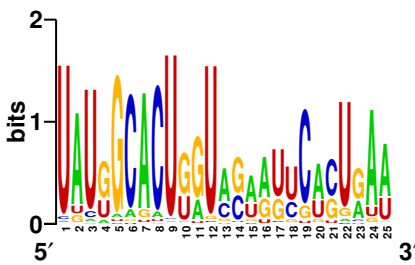

26-mers:

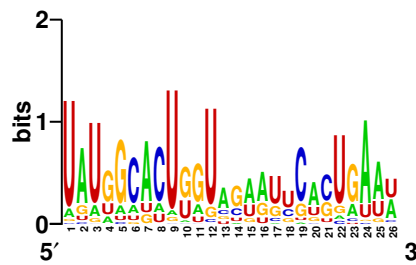

27-mers:

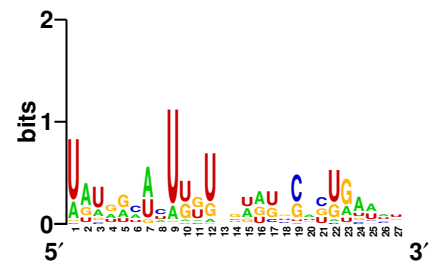

28-mers:

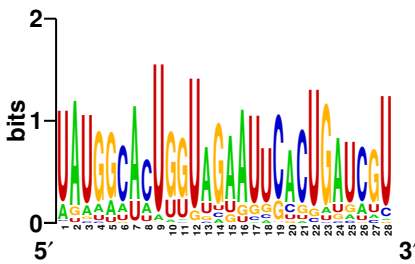

29-mers:

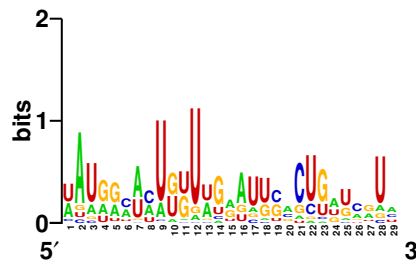

30-mers:

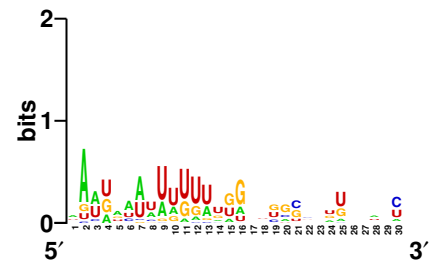

Antisense reads:

18-mers:

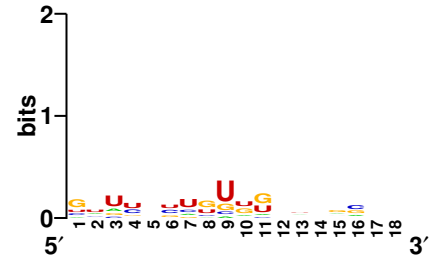

19-mers:

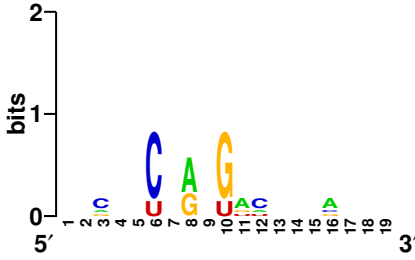

20-mers:

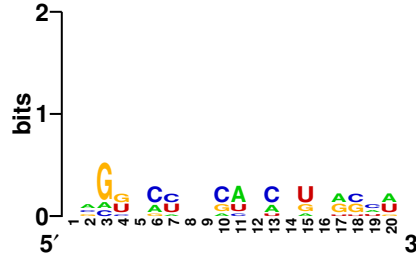

21-mers:

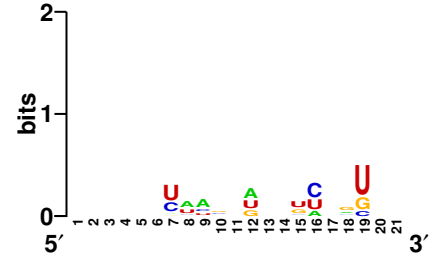

22-mers:

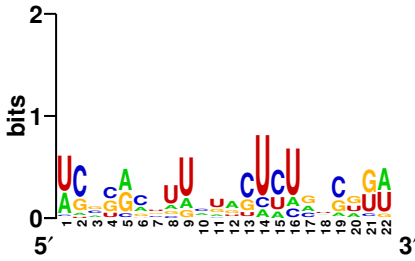

23-mers:

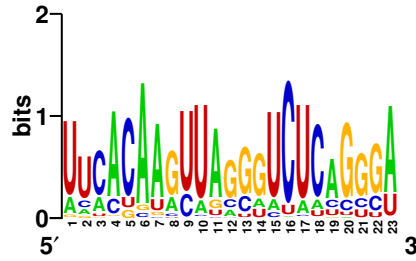

24-mers:

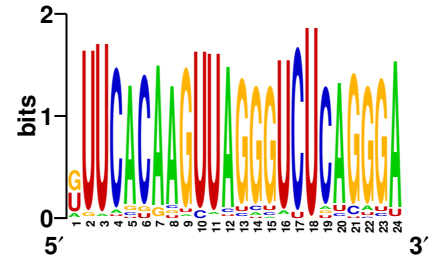

25-mers:

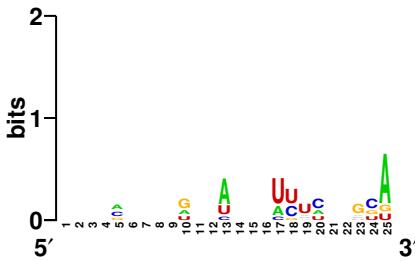

26-mers:

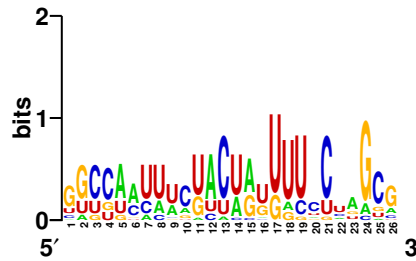

27-mers:

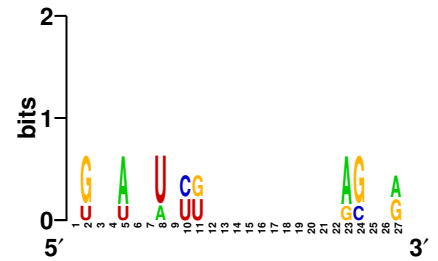

28-mers:

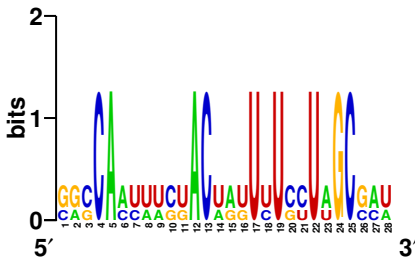

29-mers:

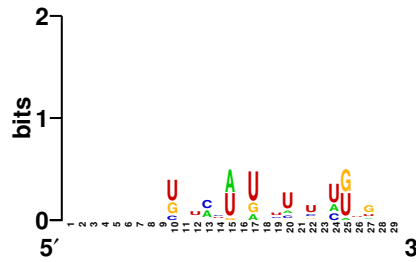

30-mers:

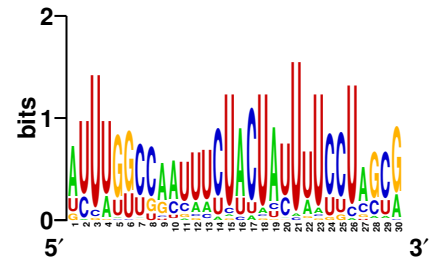



Embryo 60h, library 1:

Sense reads:

18-mers:

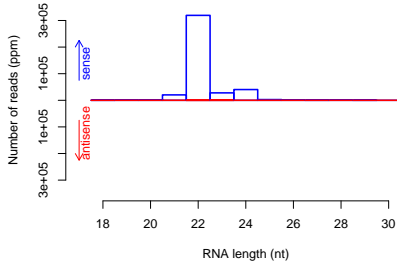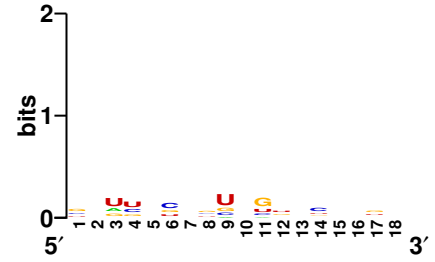

19-mers:

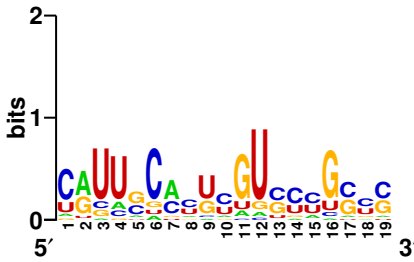

20-mers:

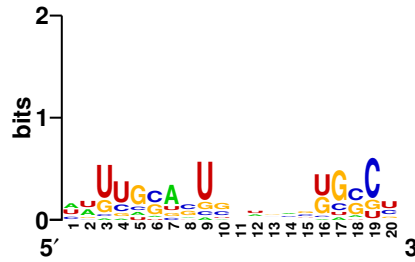

21-mers:

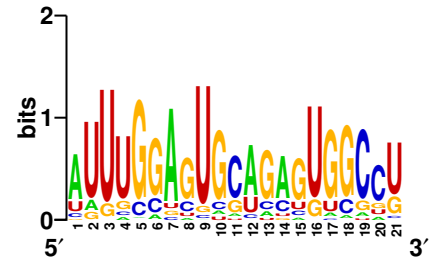

22-mers:

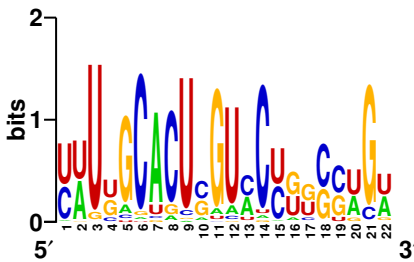

23-mers:

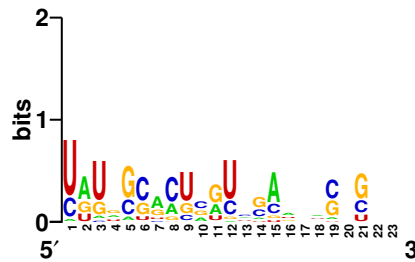

24-mers:

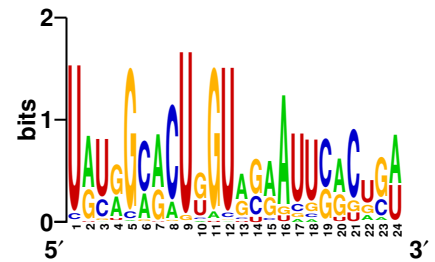

25-mers:

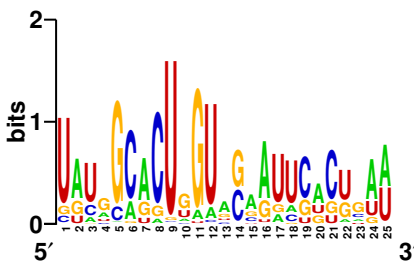

26-mers:

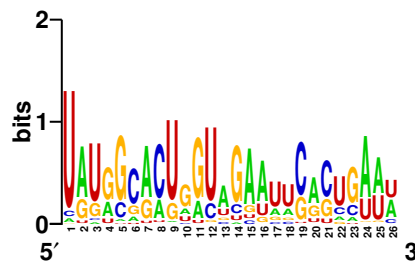

27-mers:

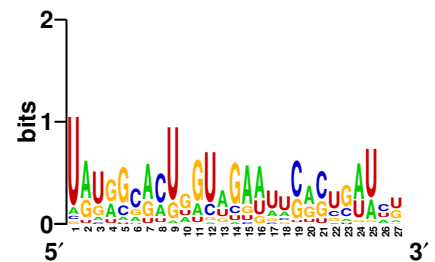

28-mers:

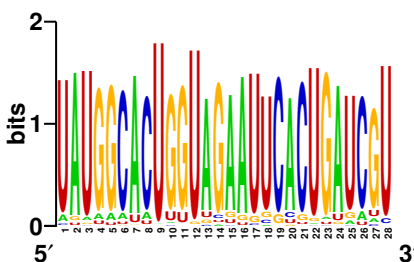

29-mers:

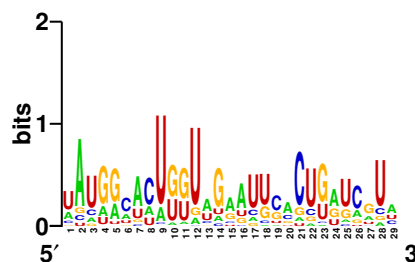

30-mers:

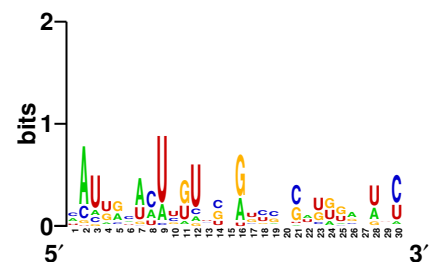

Antisense reads:

18-mers:

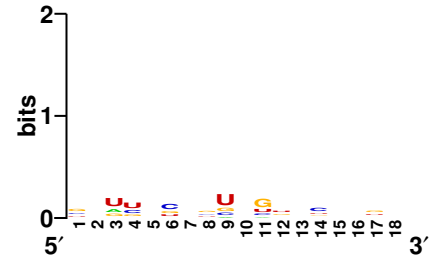

19-mers:

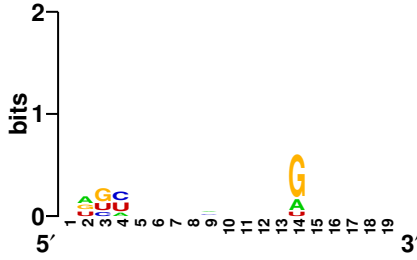

20-mers:

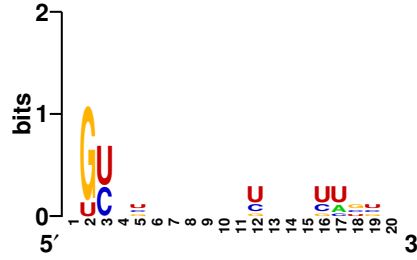

21-mers:

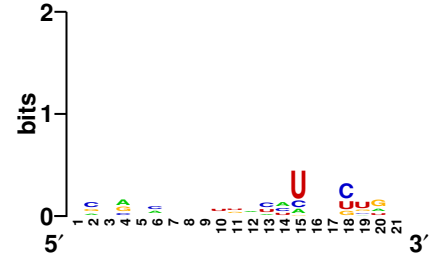

22-mers:

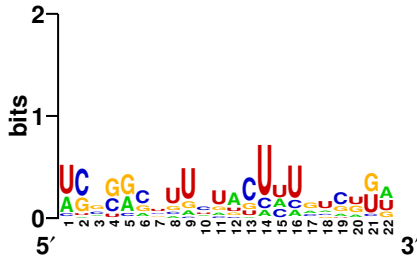

23-mers:

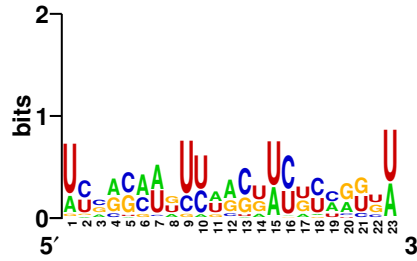

24-mers:

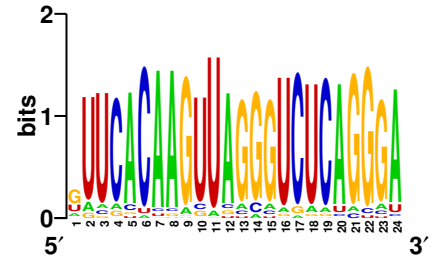

25-mers:

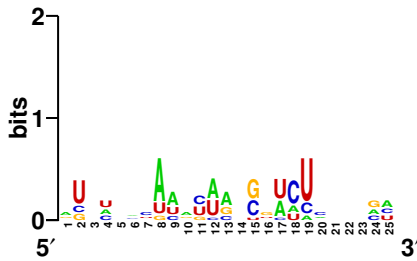

26-mers:

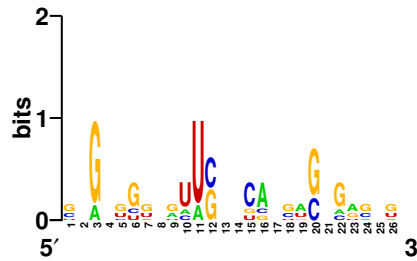

27-mers:

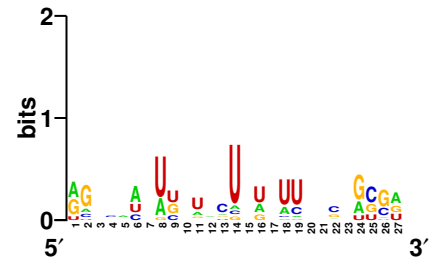

28-mers:

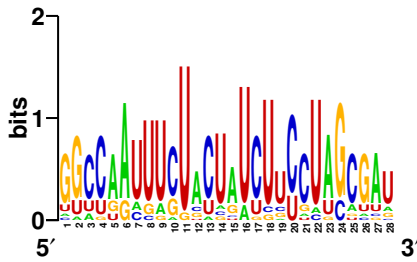

29-mers:

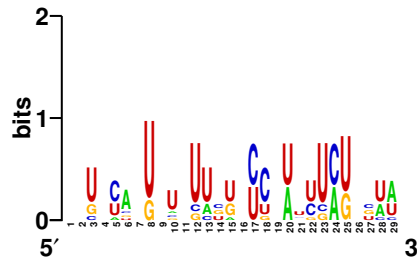

30-mers:

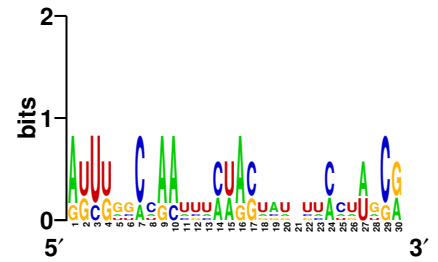

Adult female, library 1:

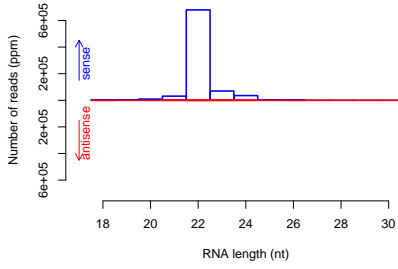

Sense reads:

18-mers:

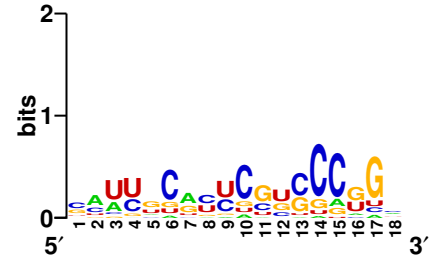

19-mers:

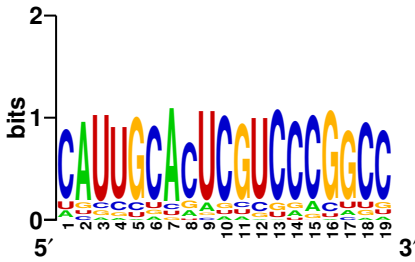

20-mers:

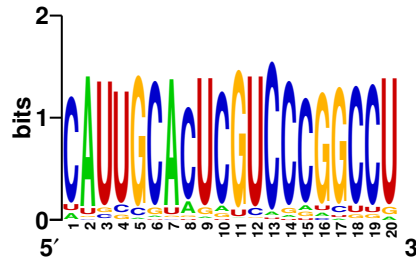

21-mers:

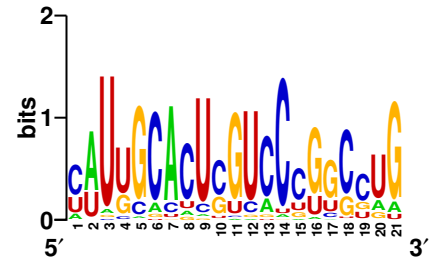

22-mers:

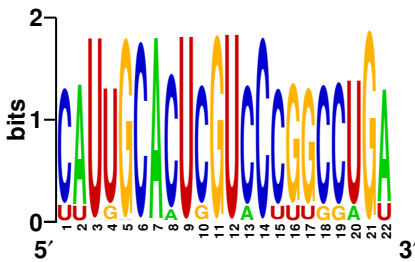

23-mers:

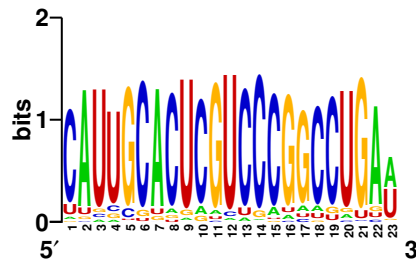

24-mers:

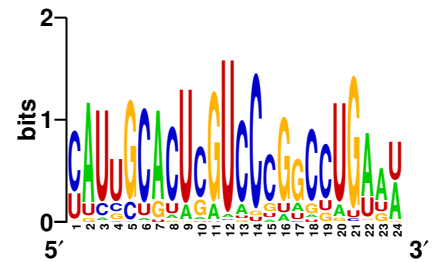

25-mers:

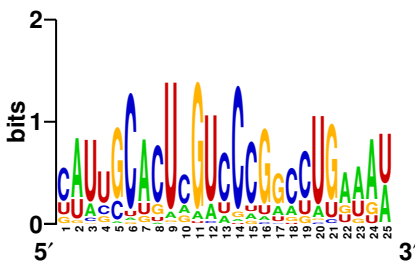

26-mers:

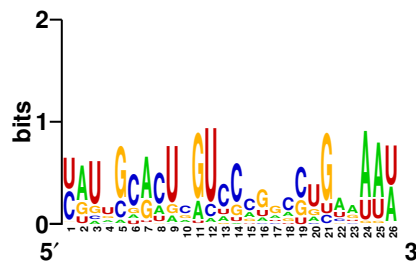

27-mers:

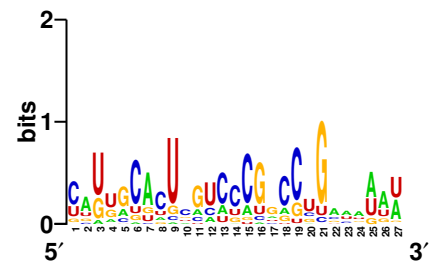

28-mers:

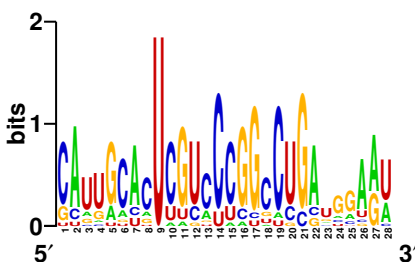

29-mers:

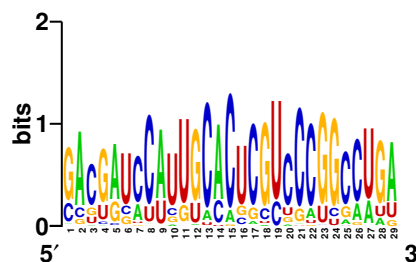

30-mers:

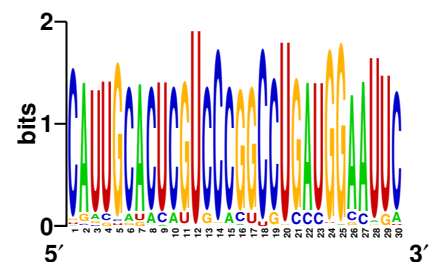

Antisense reads:

18-mers:

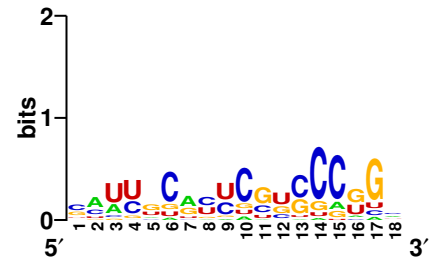

19-mers:

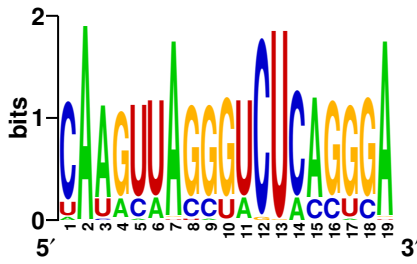

20-mers:

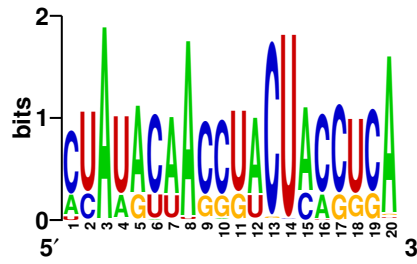

21-mers:

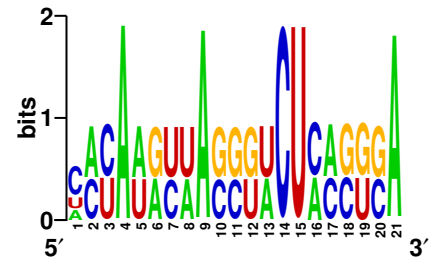

22-mers:

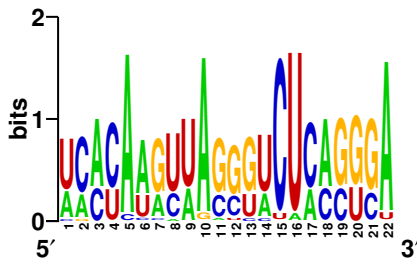

23-mers:

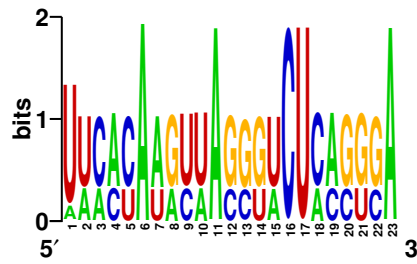

24-mers:

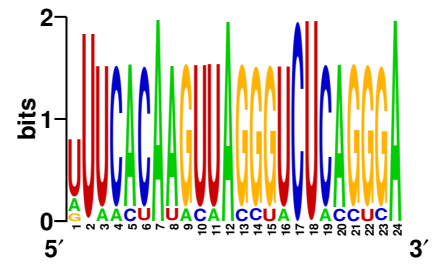

25-mers:

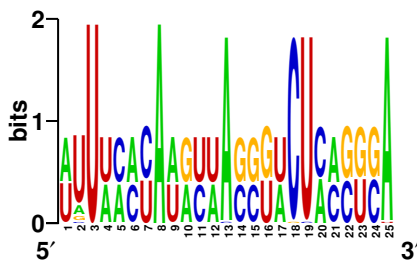

26-mers:

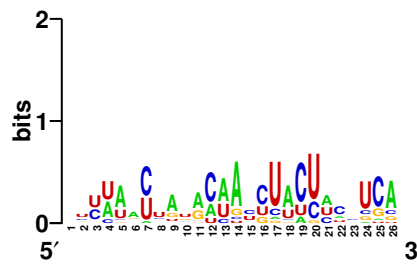

27-mers:

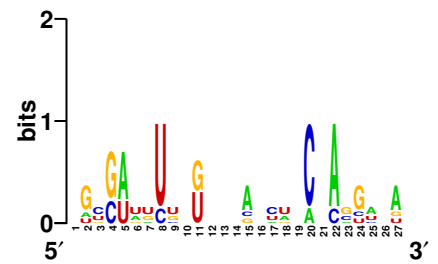

28-mers:

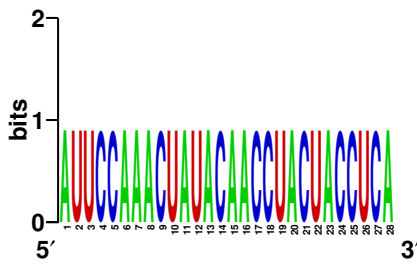

29-mers:

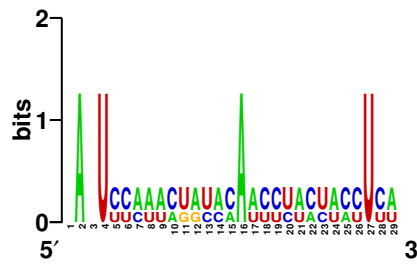

30-mers:

(no read)

Adult male, library 1:

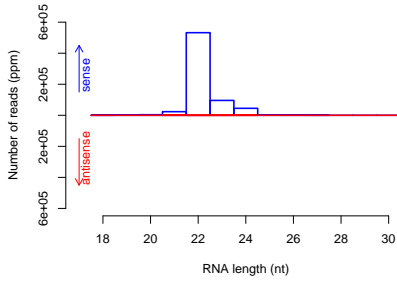

Sense reads:

18-mers:

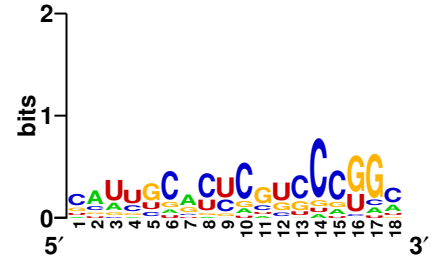

19-mers:

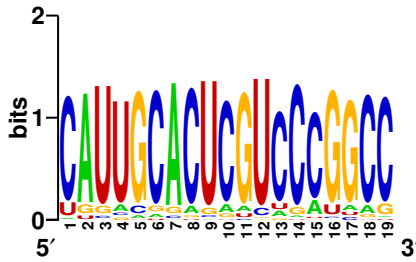

20-mers:

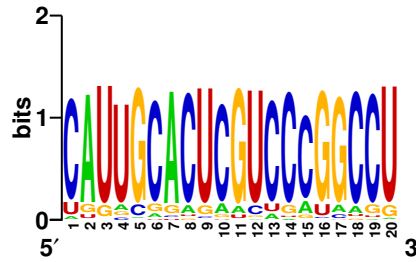

21-mers:

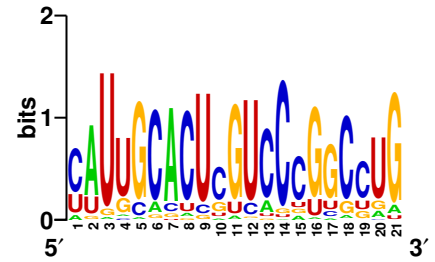

22-mers:

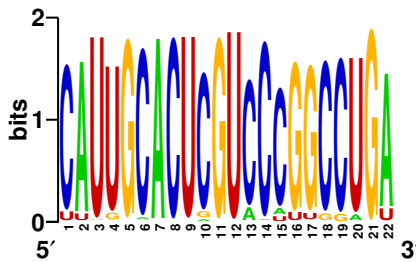

23-mers:

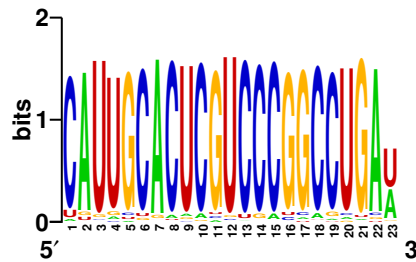

24-mers:

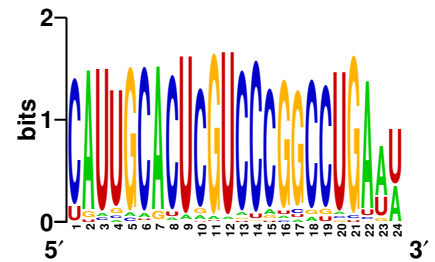

25-mers:

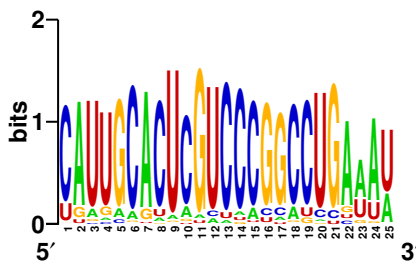

26-mers:

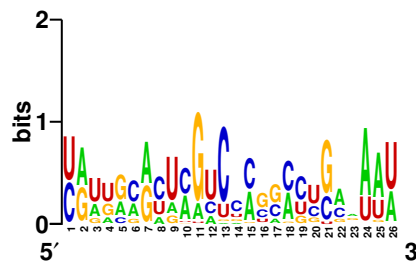

27-mers:

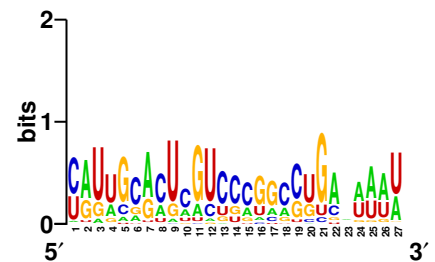

28-mers:

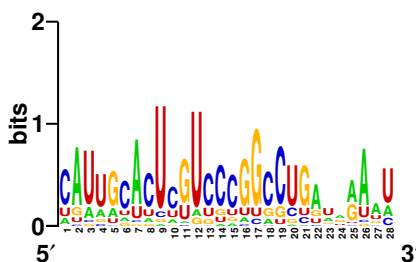

29-mers:

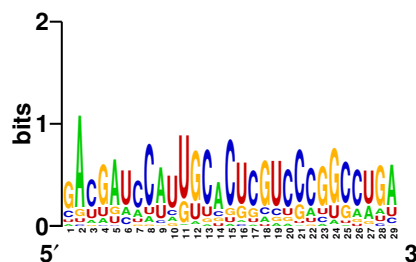

30-mers:

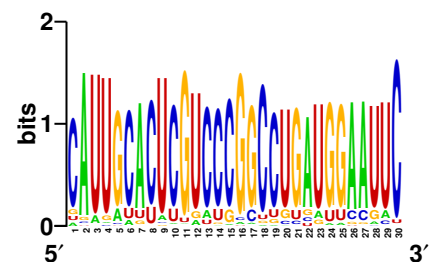

Antisense reads:

18-mers:

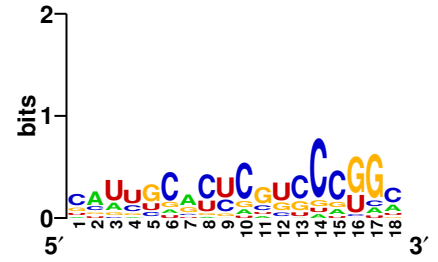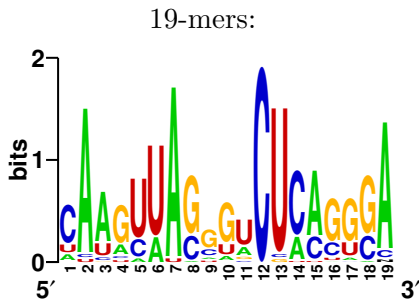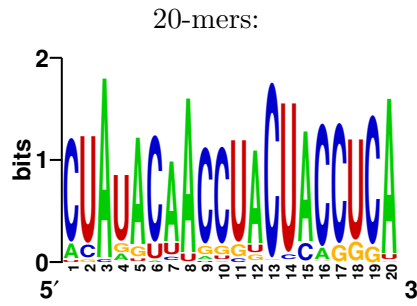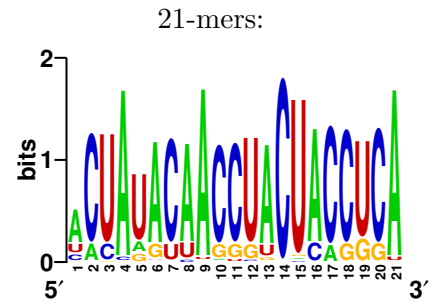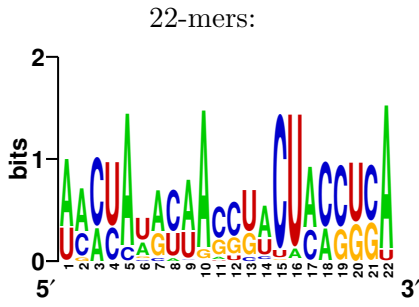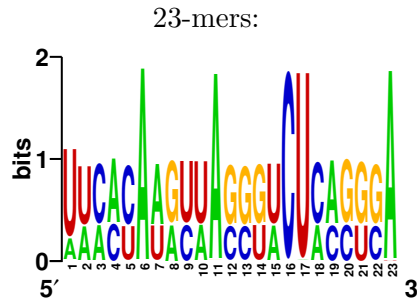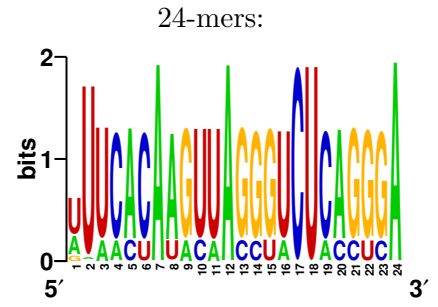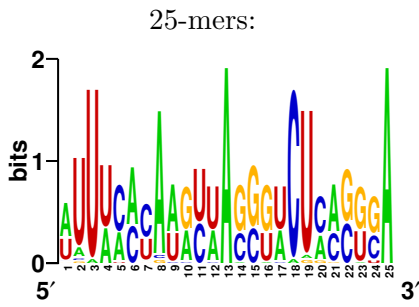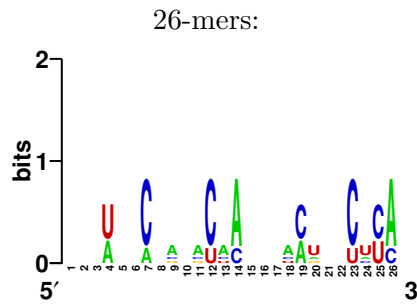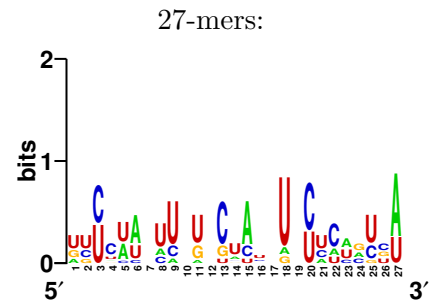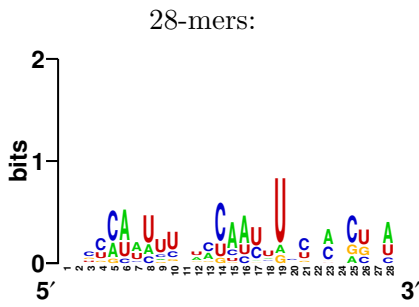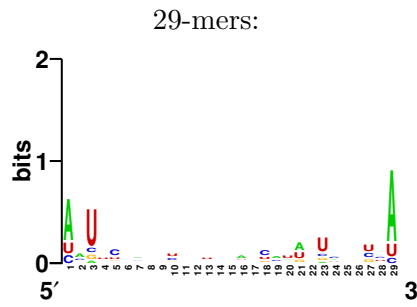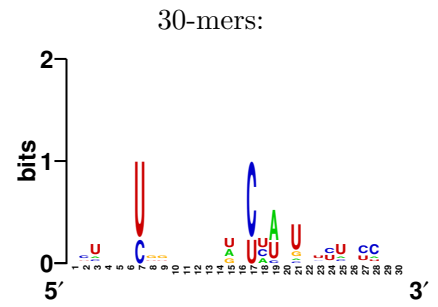

## 2.2 Libraries #2 (3' modified, 5' monophosphorylated small RNAs)

Embryo 8h, library 2:

Sense reads:

18-mers:

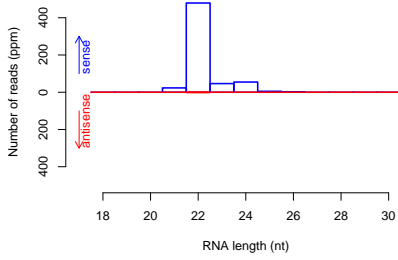

19-mers:

20-mers:

(no read)  
21-mers:

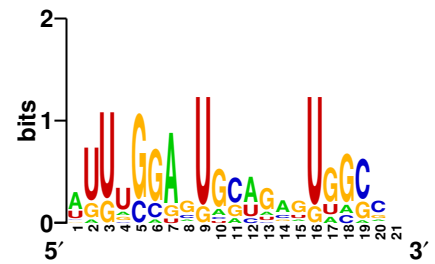

(no read)  
22-mers:

(no read)  
23-mers:

24-mers:

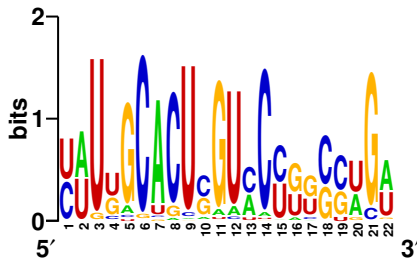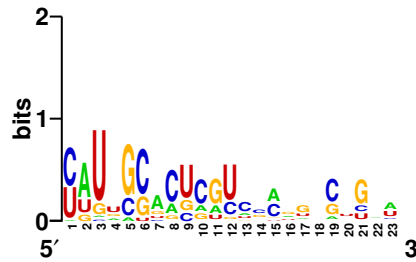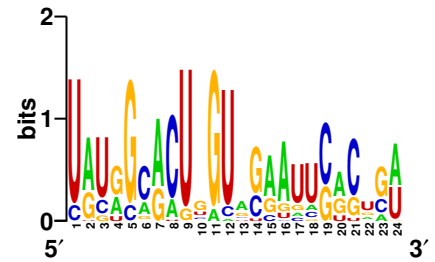

25-mers:

26-mers:

27-mers:

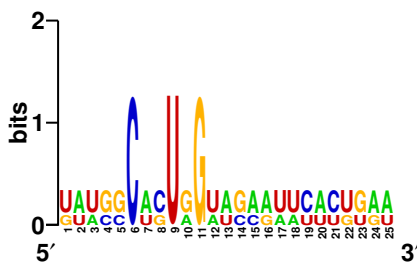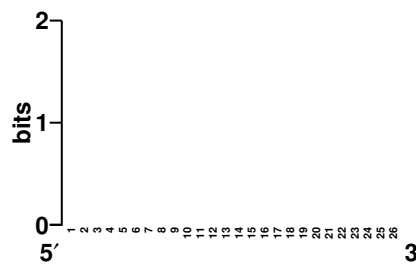

28-mers:  
(no read)

29-mers:  
(no read)

(no read)  
30-mers:  
(no read)

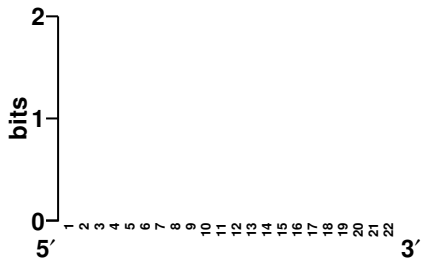

19-mers:  
(no read)  
22-mers:

Antisense reads: 18-mers:  
(no read)  
20-mers:  
(no read)  
21-mers:  
(no read)  
23-mers:  
24-mers:

25-mers:  
(no read)  
28-mers:  
(no read)

(no read) (no read)  
26-mers:  
(no read) (no read)  
27-mers:  
(no read) (no read)  
29-mers:  
(no read) (no read)  
30-mers:  
(no read)





|           |                  |           |
|-----------|------------------|-----------|
|           | Antisense reads: | 18-mers:  |
|           |                  | (no read) |
| 19-mers:  | 20-mers:         | 21-mers:  |
| (no read) | (no read)        | (no read) |
| 22-mers:  | 23-mers:         | 24-mers:  |
| (no read) | (no read)        | (no read) |
| 25-mers:  | 26-mers:         | 27-mers:  |
| (no read) | (no read)        | (no read) |
| 28-mers:  | 29-mers:         | 30-mers:  |
| (no read) | (no read)        | (no read) |





19-mers:  
 (no read)  
 22-mers:

Antisense reads: 18-mers:  
 (no read)  
 20-mers:  
 (no read)  
 21-mers:  
 (no read)  
 23-mers:  
 24-mers:

25-mers:  
 (no read)  
 28-mers:  
 (no read)

(no read) (no read)  
 26-mers:  
 (no read) (no read)  
 27-mers:  
 (no read) (no read)  
 29-mers:  
 (no read) (no read)  
 30-mers:  
 (no read) (no read)

Embryo 60h, library 2:

Sense reads:

18-mers:

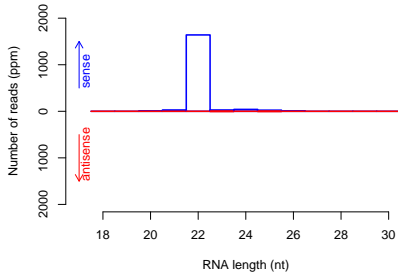

19-mers:

20-mers:

(no read)  
21-mers:

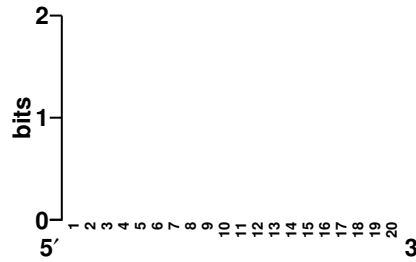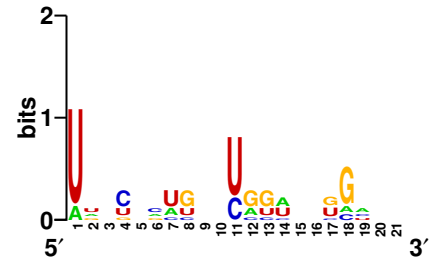

(no read)  
22-mers:

23-mers:

24-mers:

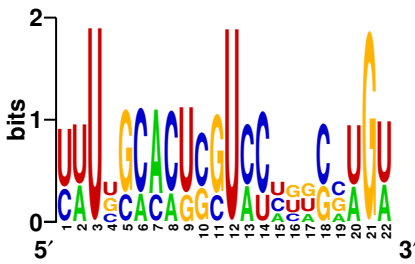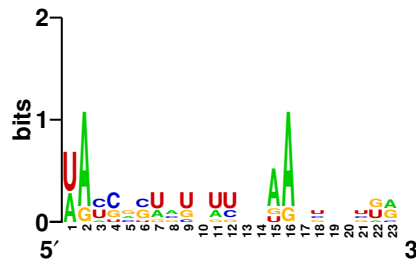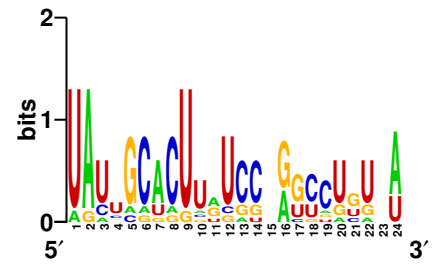

25-mers:

26-mers:

27-mers:

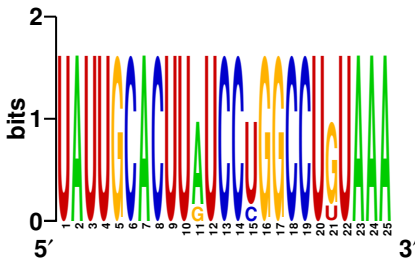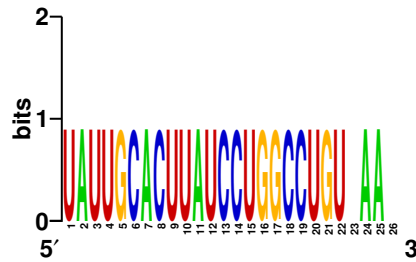

28-mers:  
(no read)

29-mers:  
(no read)

(no read)  
30-mers:  
(no read)

19-mers:  
(no read)  
22-mers:

Antisense reads:  
20-mers:  
(no read)  
23-mers:

18-mers:  
(no read)  
21-mers:  
(no read)  
24-mers:

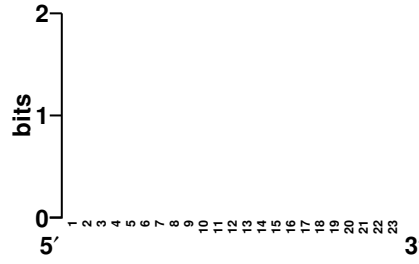

(no read)  
25-mers:

26-mers:

(no read)  
27-mers:

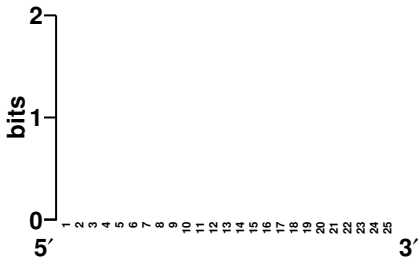

28-mers:  
(no read)

(no read)  
29-mers:  
(no read)

(no read)  
30-mers:  
(no read)

Adult female, library 2:

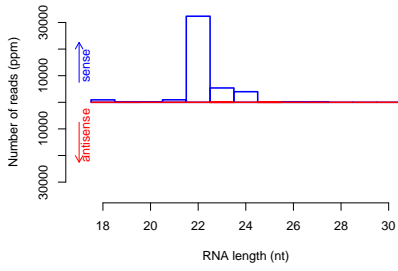

Sense reads:

18-mers:

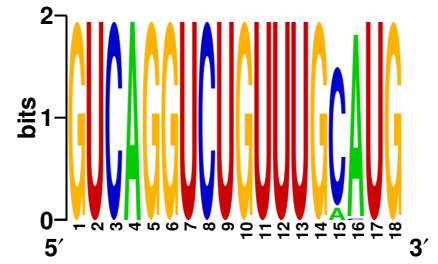

19-mers:

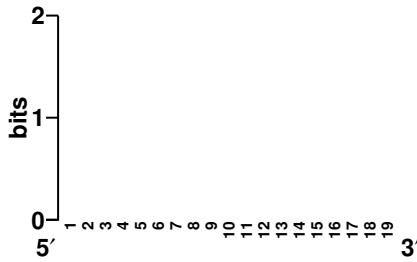

20-mers:

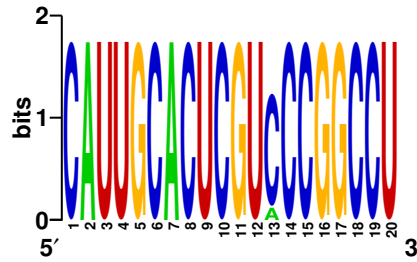

21-mers:

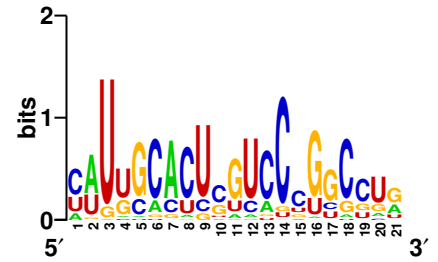

22-mers:

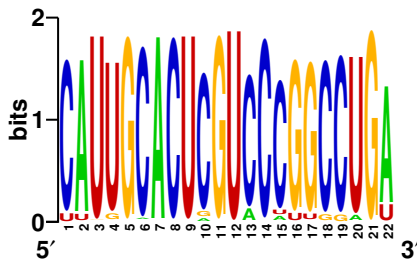

23-mers:

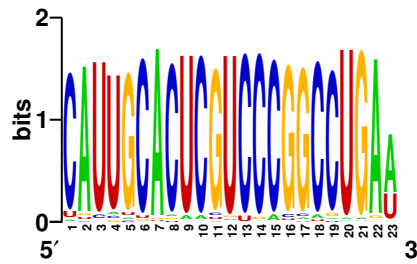

24-mers:

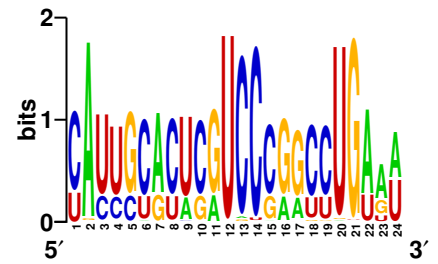

25-mers:

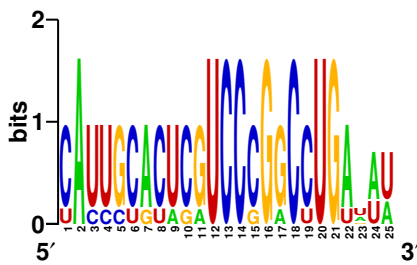

26-mers:

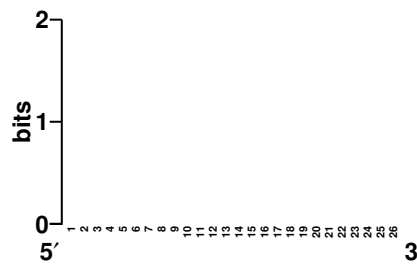

27-mers:

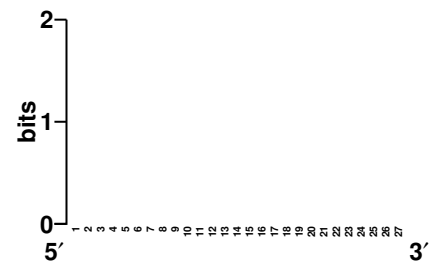

28-mers:  
(no read)

29-mers:  
(no read)

30-mers:  
(no read)

Antisense reads:

18-mers:

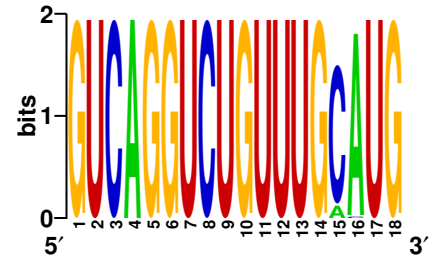

19-mers:  
(no read)  
22-mers:

20-mers:  
(no read)  
23-mers:

21-mers:  
(no read)  
24-mers:

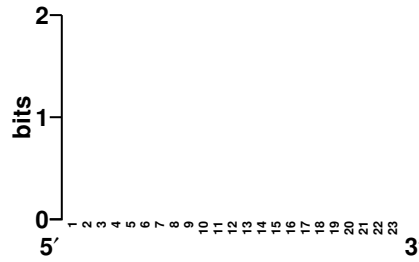

(no read)  
25-mers:

26-mers:

(no read)  
27-mers:

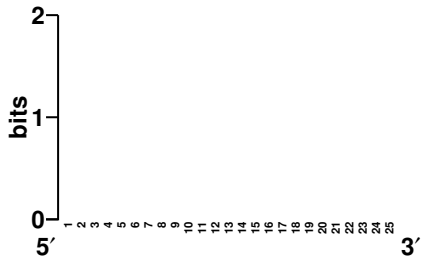

28-mers:  
(no read)

(no read)  
29-mers:  
(no read)

(no read)  
30-mers:  
(no read)



Adult male, library 2:

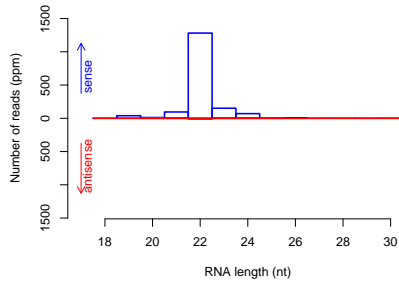

Sense reads:

18-mers:

19-mers:

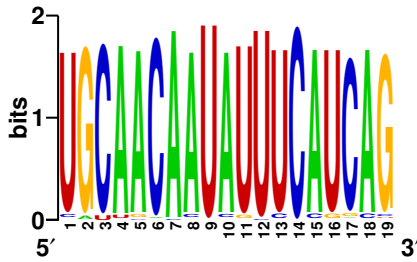

20-mers:

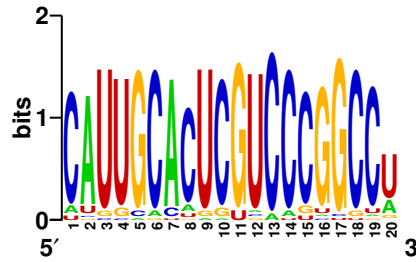

(no read)  
21-mers:

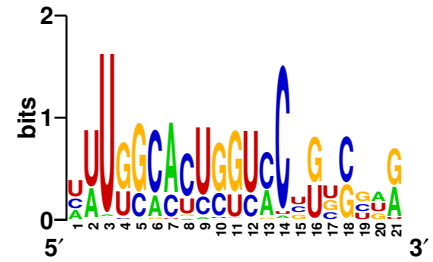

22-mers:

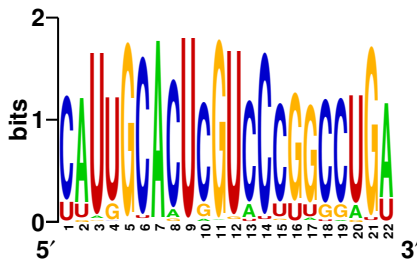

23-mers:

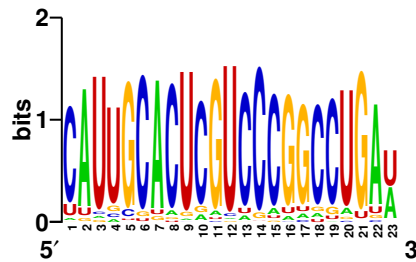

24-mers:

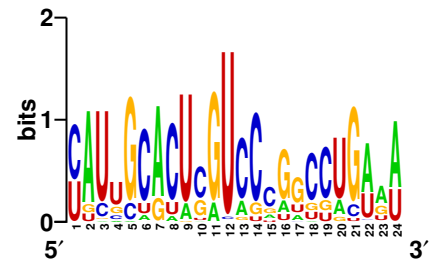

25-mers:

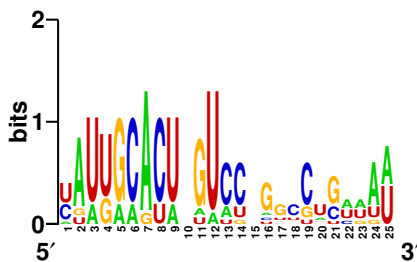

26-mers:

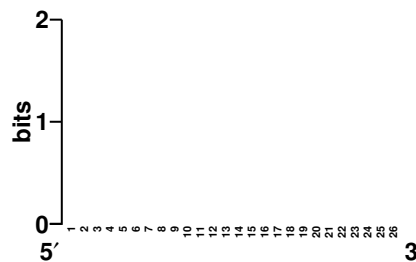

27-mers:

28-mers:  
(no read)

29-mers:  
(no read)

(no read)  
30-mers:  
(no read)

Antisense reads:

19-mers:

20-mers:

18-mers:  
(no read)  
21-mers:

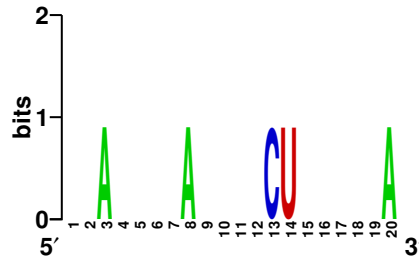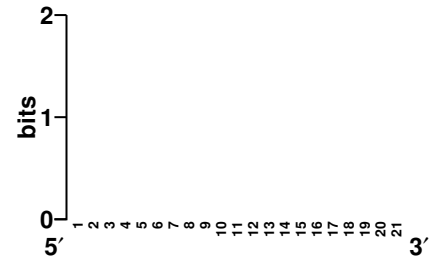

(no read)  
22-mers:

23-mers:

24-mers:

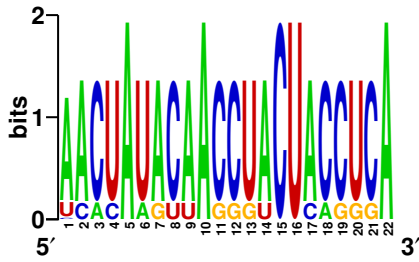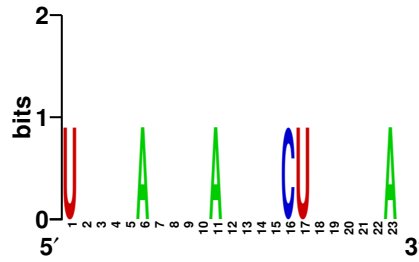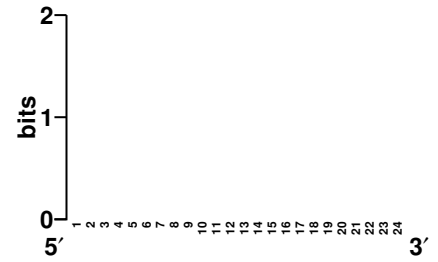

25-mers:

26-mers:

27-mers:

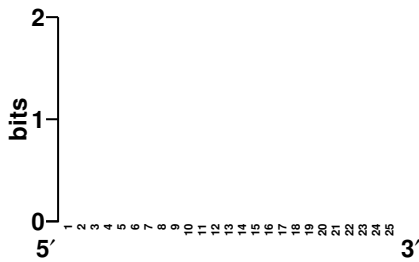

28-mers:  
(no read)

(no read)  
29-mers:  
(no read)

(no read)  
30-mers:  
(no read)

## 2.3 Libraries #3 (total 5' hydroxyl or polyphosphorylated small RNAs)

Embryo 8h, library 3:

Sense reads:

18-mers:

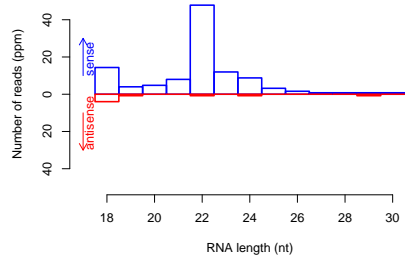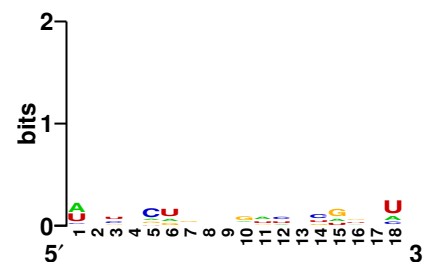

19-mers:

20-mers:

21-mers:

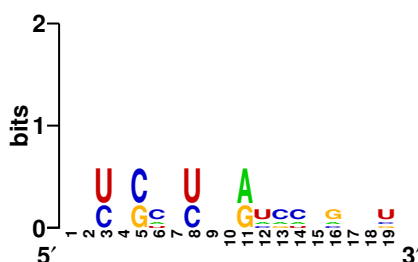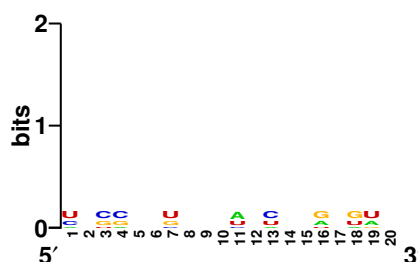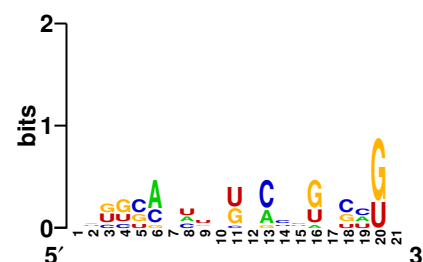

22-mers:

23-mers:

24-mers:

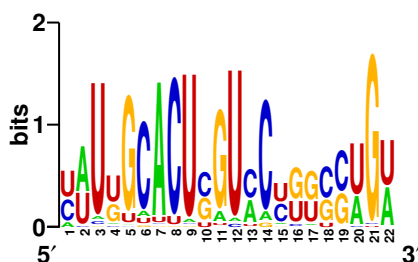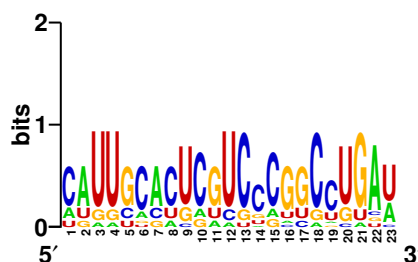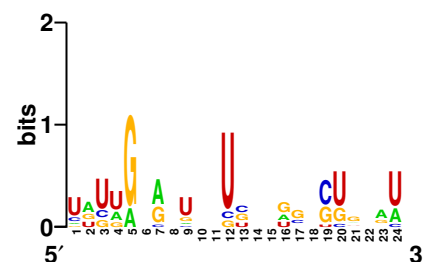

25-mers:

26-mers:

27-mers:

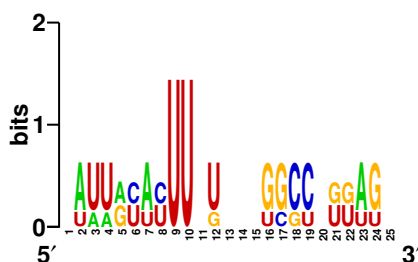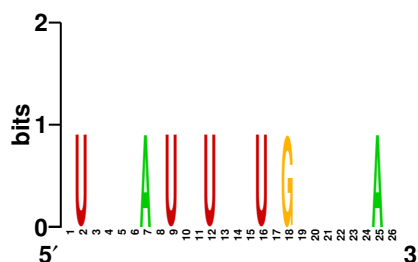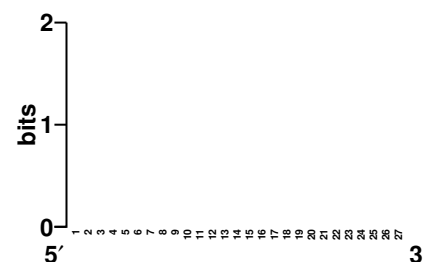

28-mers:

29-mers:

30-mers:

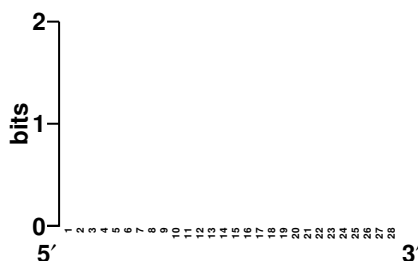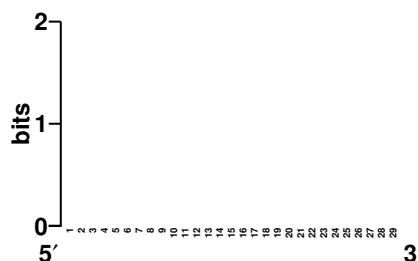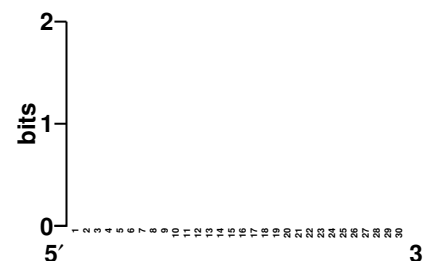

Antisense reads:

18-mers:

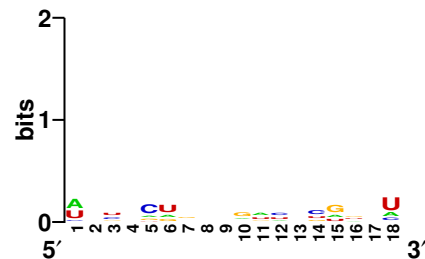

19-mers:

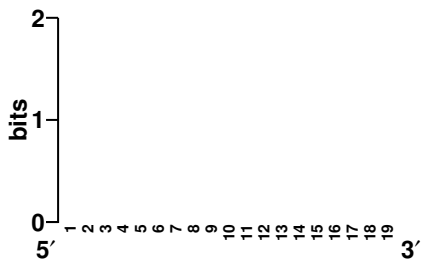

20-mers:

(no read)

23-mers:

(no read)

26-mers:

(no read)

29-mers:

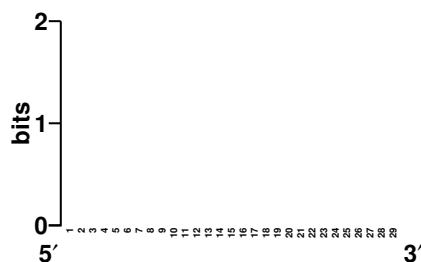

21-mers:

(no read)

24-mers:

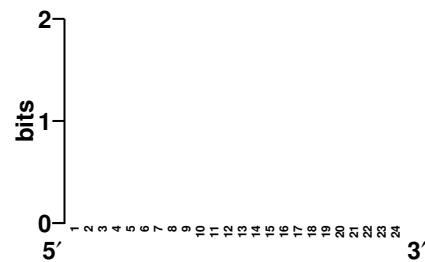

22-mers:

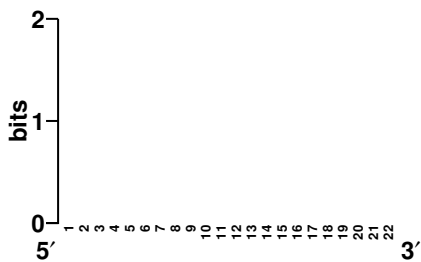

25-mers:

(no read)

28-mers:

(no read)

27-mers:

(no read)

30-mers:

(no read)

Embryo 15h, library 3:

Sense reads:

18-mers:

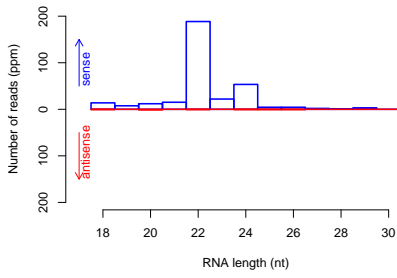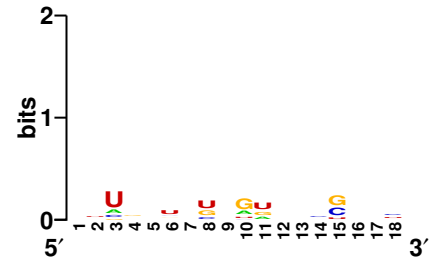

19-mers:

20-mers:

21-mers:

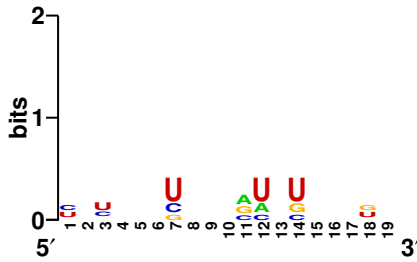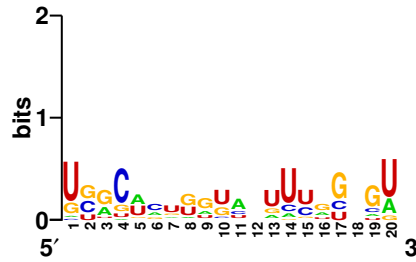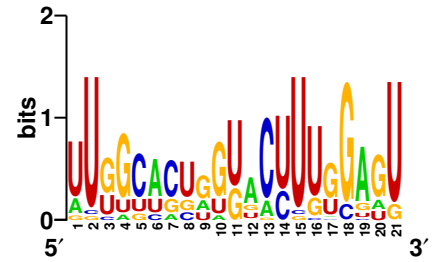

22-mers:

23-mers:

24-mers:

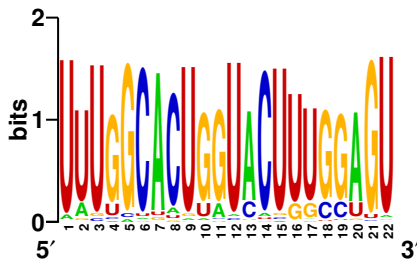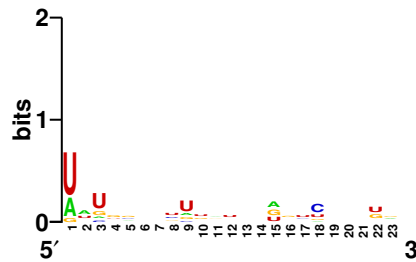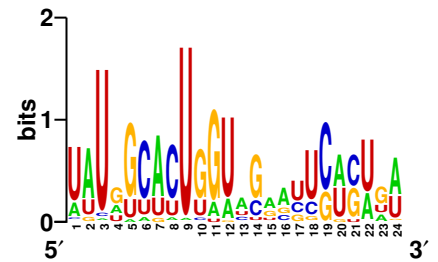

25-mers:

26-mers:

27-mers:

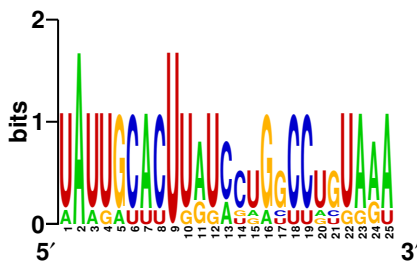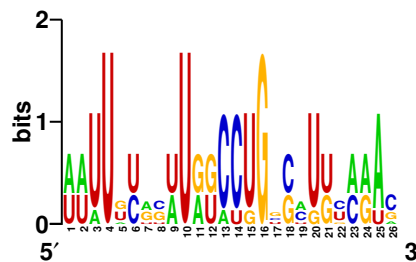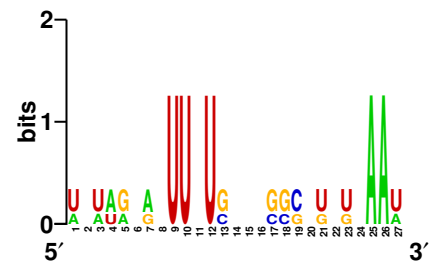

28-mers:

29-mers:

30-mers:

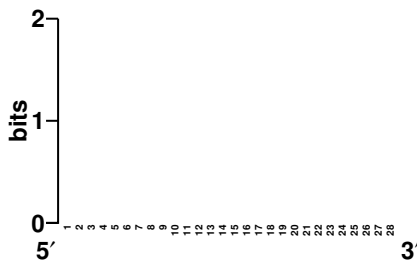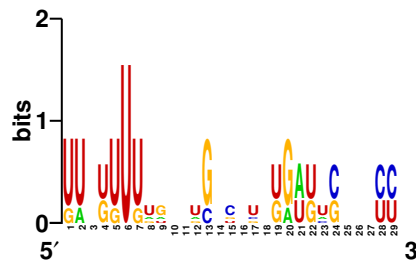

(no read)

Antisense reads:

18-mers:

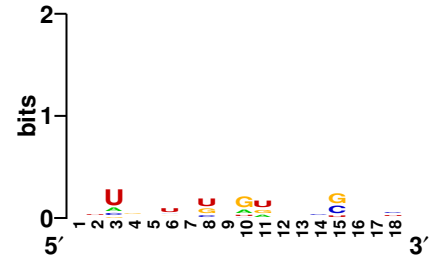

19-mers:

20-mers:

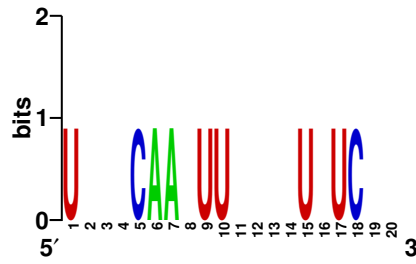

21-mers:

(no read)  
22-mers:

23-mers:

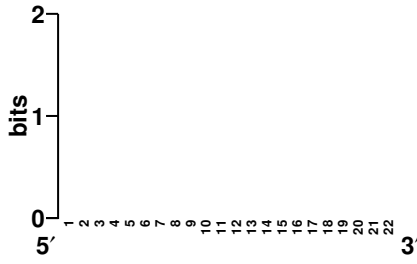

(no read)  
24-mers:

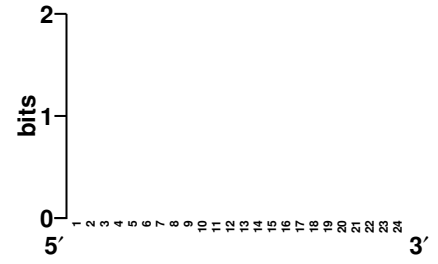

25-mers:

(no read)  
26-mers:

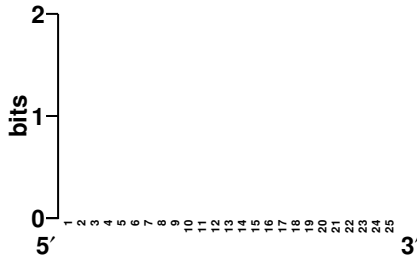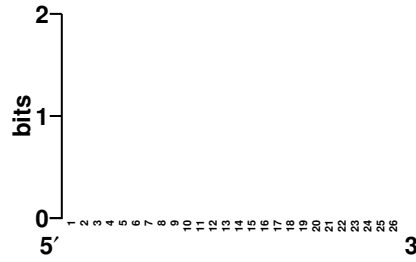

27-mers:

28-mers:  
(no read)

29-mers:  
(no read)

(no read)  
30-mers:  
(no read)

Embryo 36h, library 3:

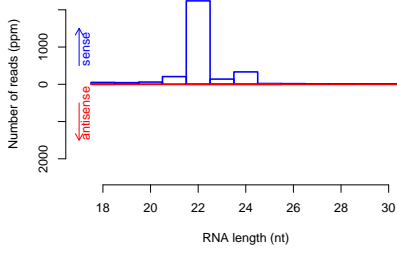

Sense reads:

18-mers:

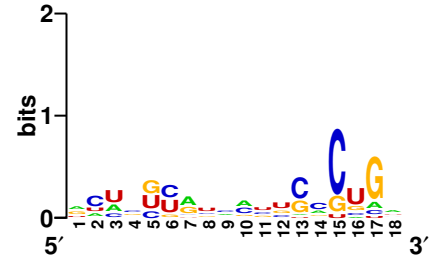

19-mers:

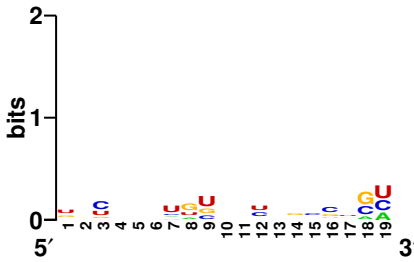

20-mers:

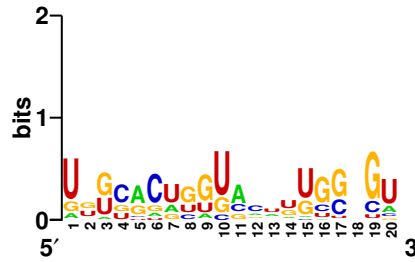

21-mers:

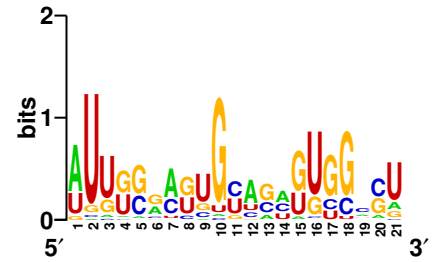

22-mers:

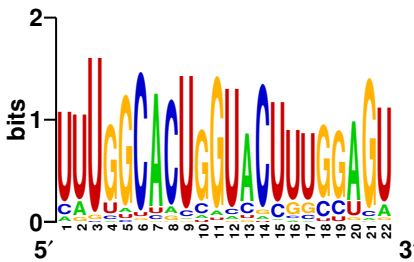

23-mers:

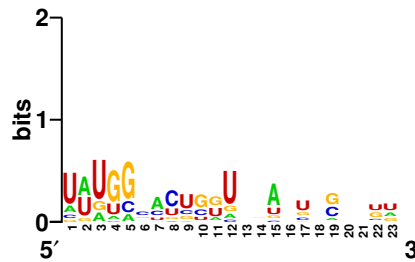

24-mers:

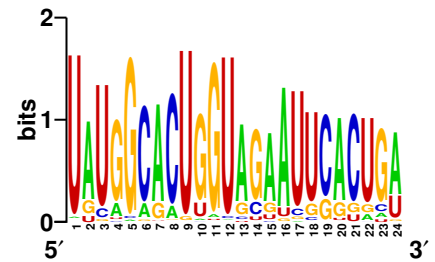

25-mers:

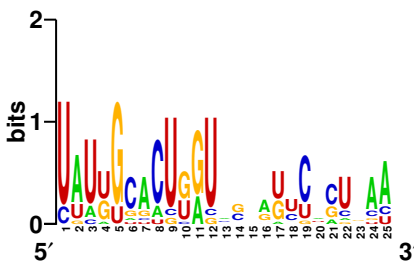

26-mers:

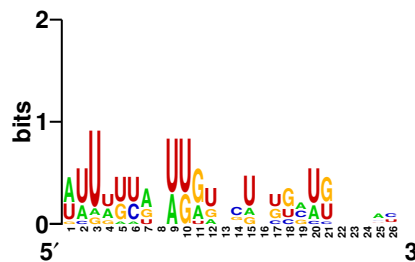

27-mers:

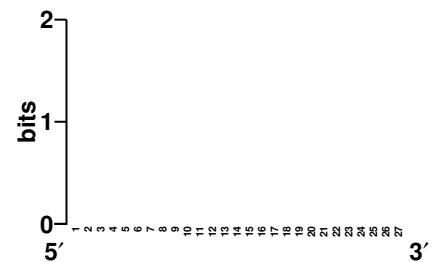

28-mers:

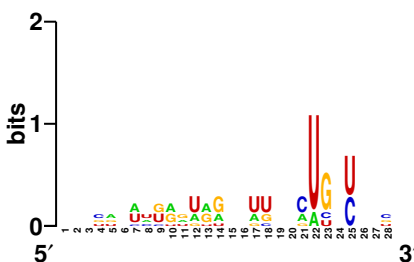

29-mers:

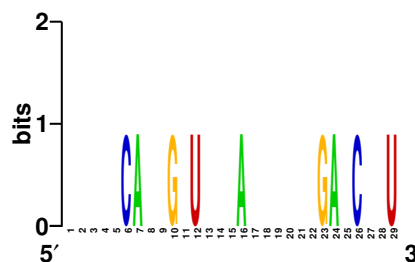

30-mers:

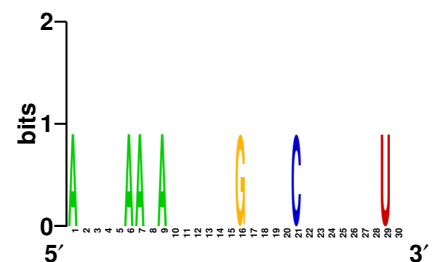





Embryo 60h, library 3:

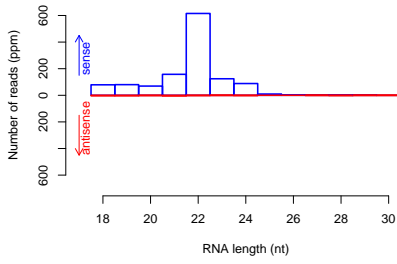

Sense reads:

18-mers:

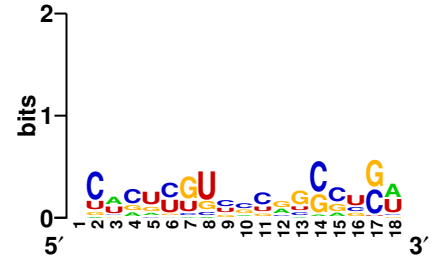

19-mers:

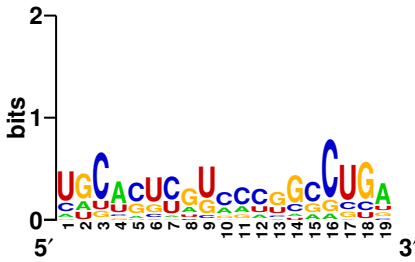

20-mers:

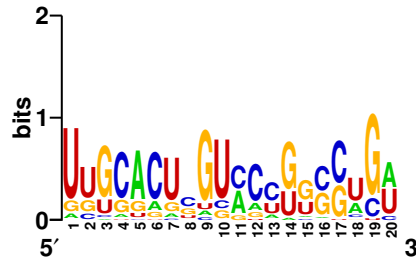

21-mers:

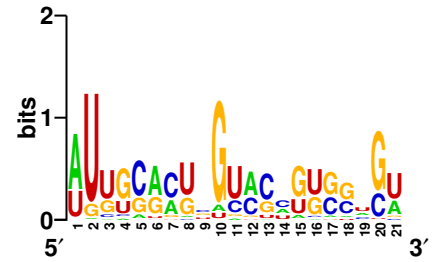

22-mers:

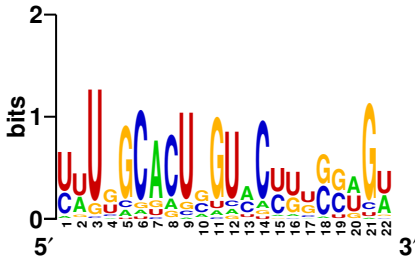

23-mers:

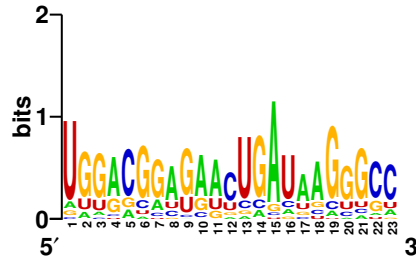

24-mers:

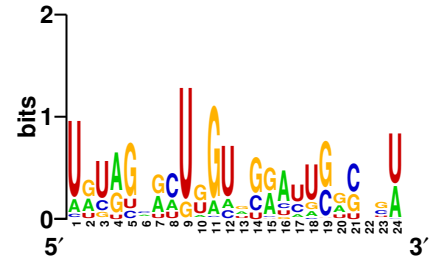

25-mers:

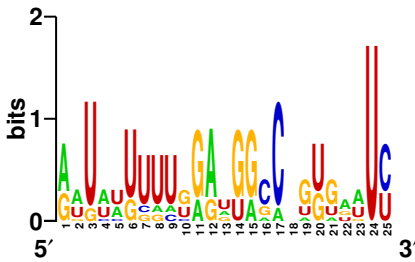

26-mers:

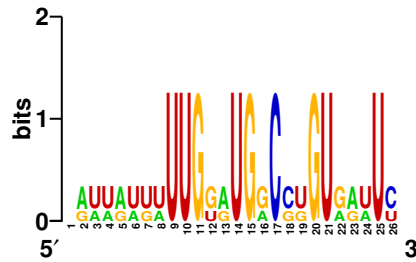

27-mers:

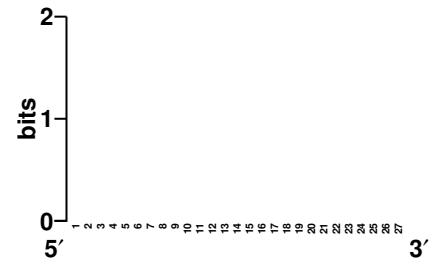

28-mers:

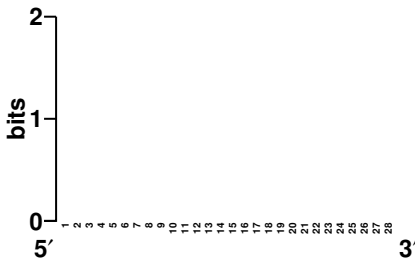

29-mers:

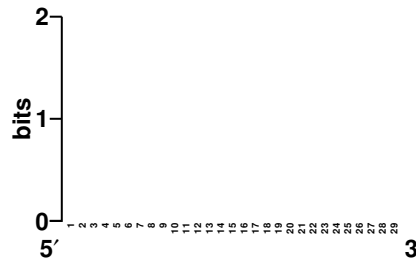

30-mers:

(no read)

Antisense reads:

18-mers:

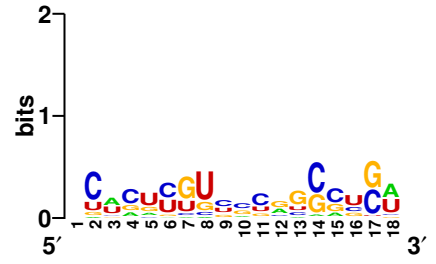

19-mers:

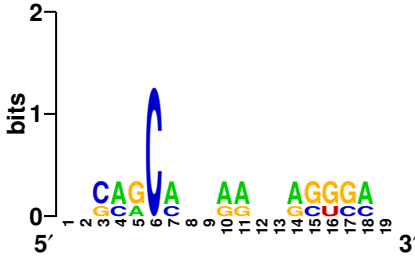

20-mers:

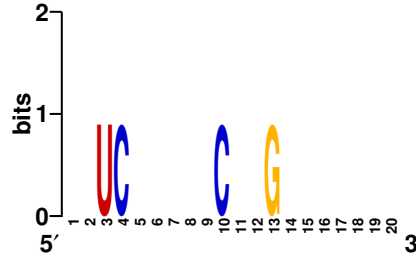

21-mers:

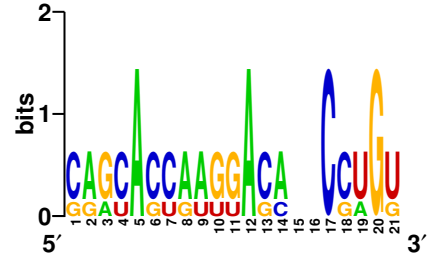

22-mers:

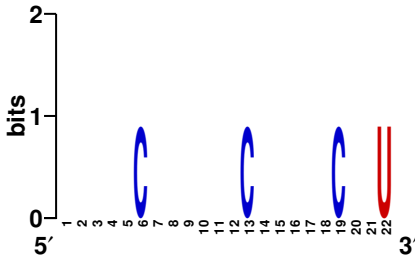

23-mers:

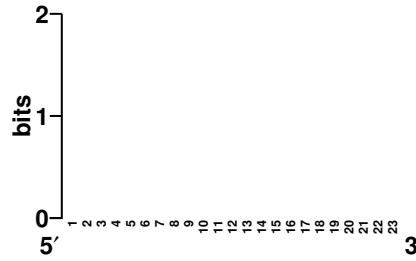

24-mers:

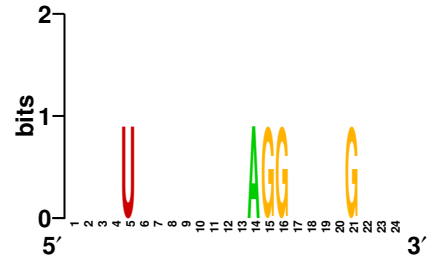

25-mers:

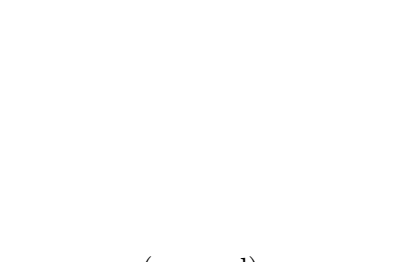

26-mers:

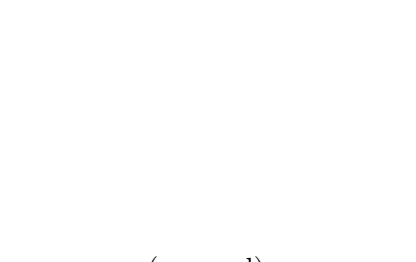

27-mers:

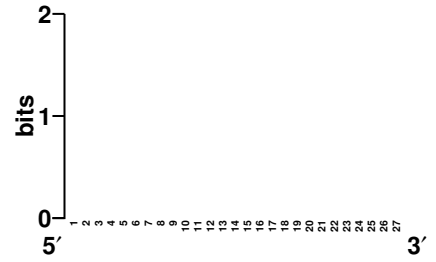

(no read)  
28-mers:

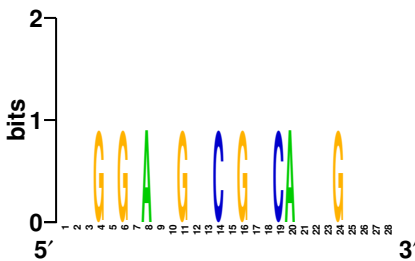

(no read)  
29-mers:

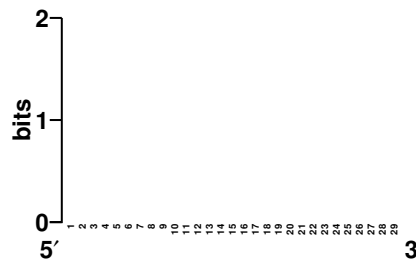

30-mers:

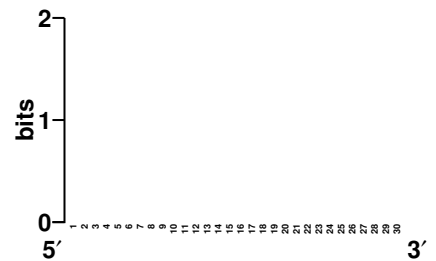

Adult female, library 3:

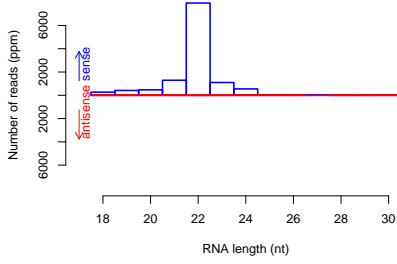

Sense reads:

18-mers:

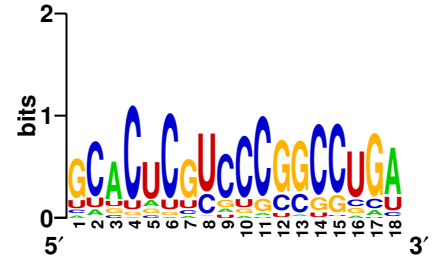

19-mers:

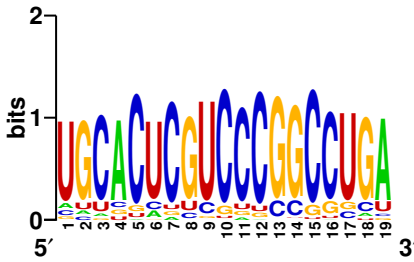

20-mers:

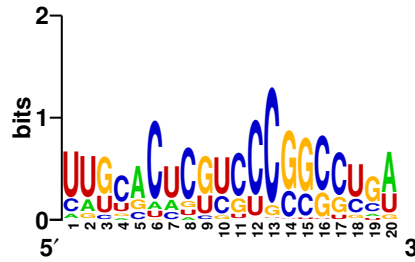

21-mers:

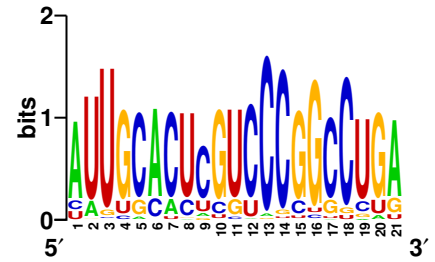

22-mers:

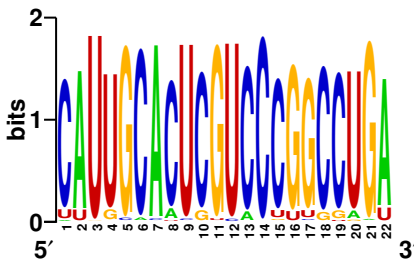

23-mers:

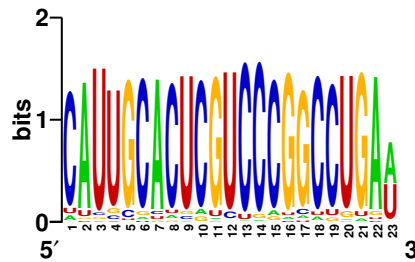

24-mers:

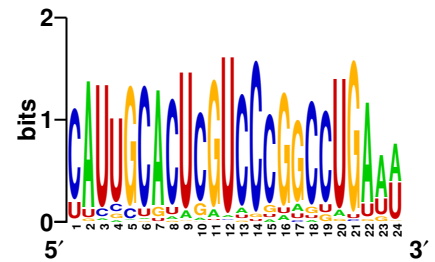

25-mers:

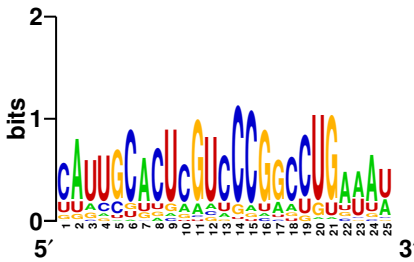

26-mers:

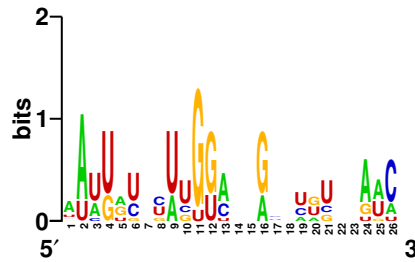

27-mers:

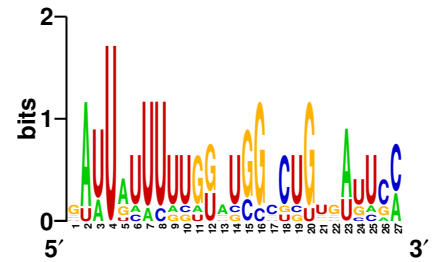

28-mers:

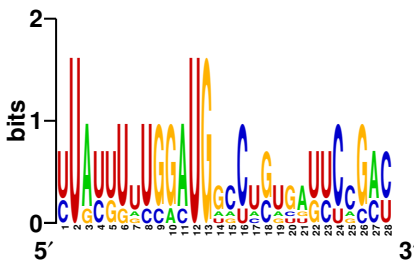

29-mers:

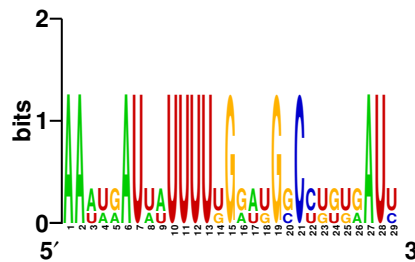

30-mers:

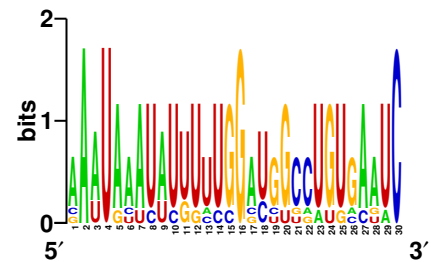



Adult male, library 3:

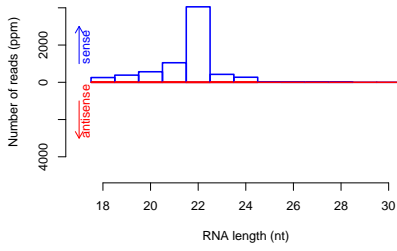

Sense reads:

18-mers:

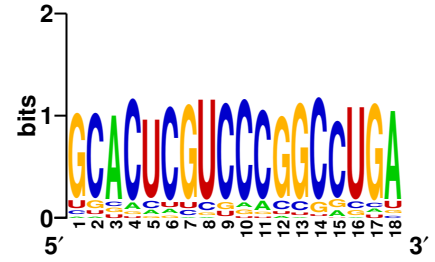

19-mers:

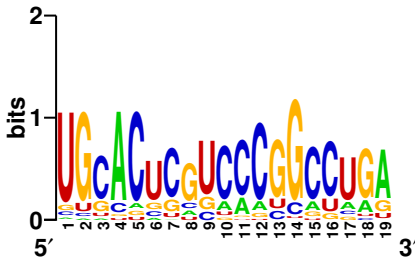

20-mers:

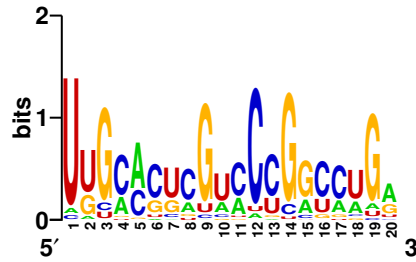

21-mers:

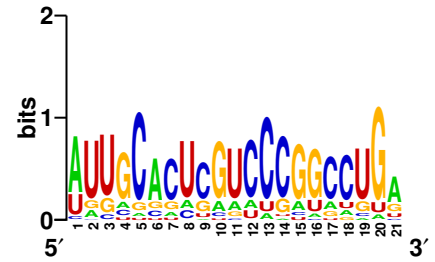

22-mers:

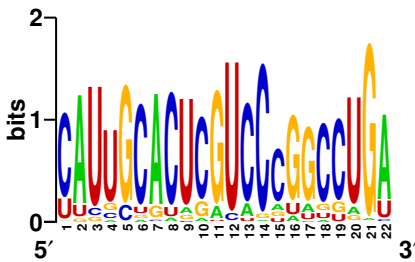

23-mers:

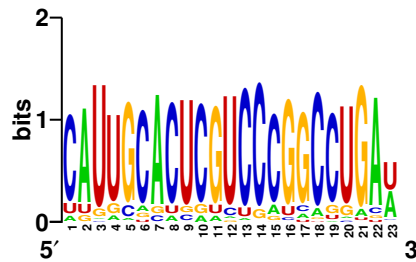

24-mers:

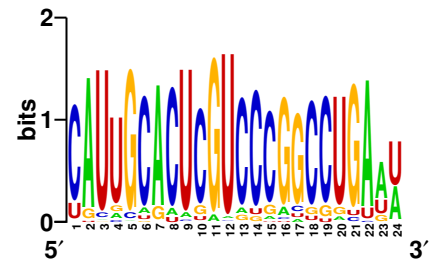

25-mers:

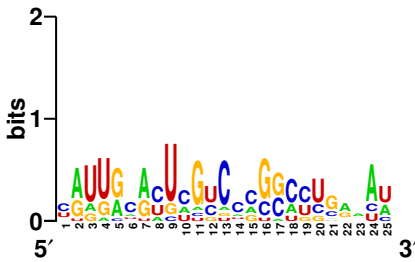

26-mers:

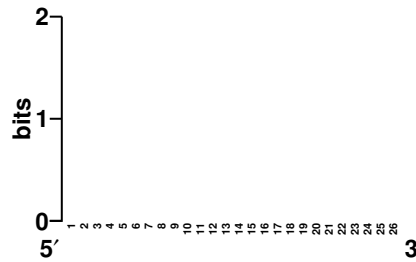

27-mers:



28-mers:

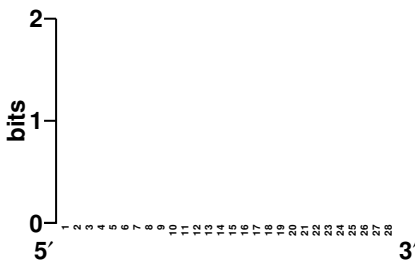

29-mers:

(no read)

30-mers:

(no read)

Antisense reads:

18-mers:

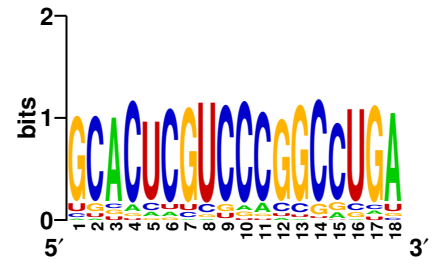

19-mers:

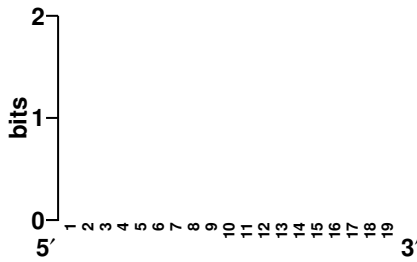

20-mers:

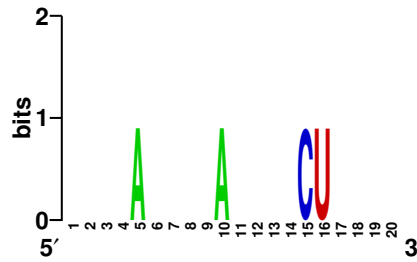

21-mers:

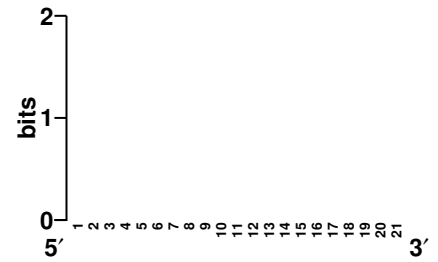

22-mers:

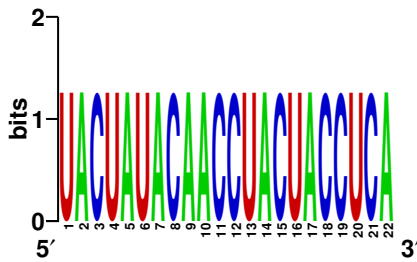

23-mers:

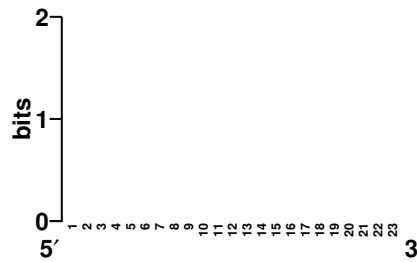

24-mers:

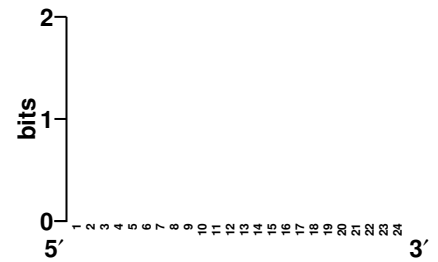

25-mers:  
(no read)

26-mers:  
(no read)

27-mers:  
(no read)

28-mers:  
(no read)

29-mers:  
(no read)

30-mers:  
(no read)

## 2.4 Libraries #4 (3' modified, 5' hydroxyl or polyphosphorylated small RNAs)

Embryo 8h, library 4:

Sense reads:

18-mers:

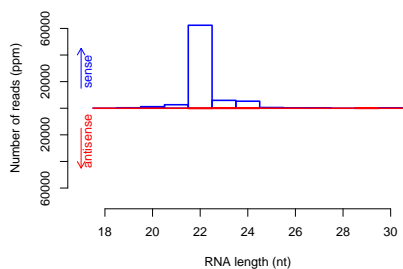

19-mers:

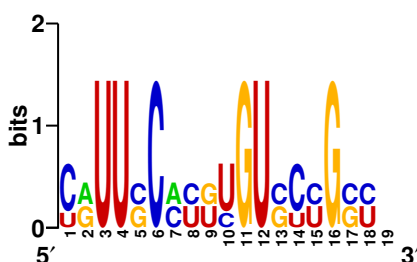

20-mers:

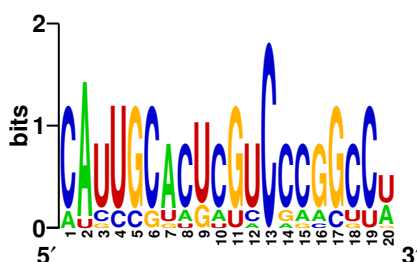

(no read)

21-mers:

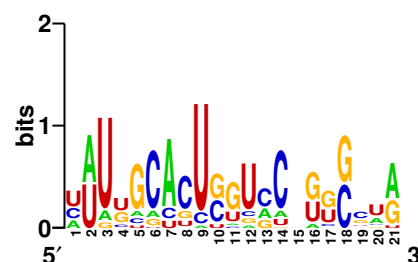

22-mers:

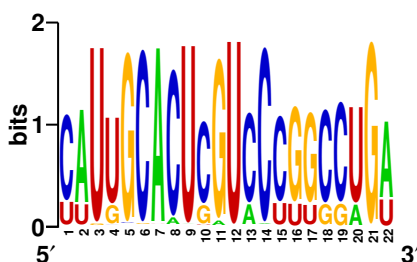

23-mers:

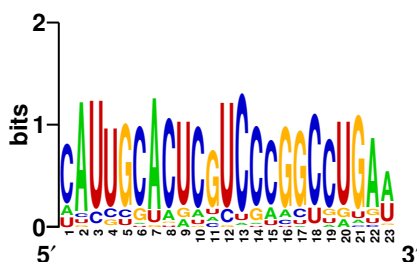

24-mers:

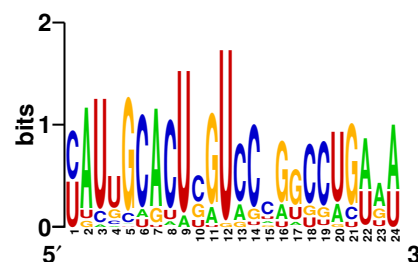

25-mers:

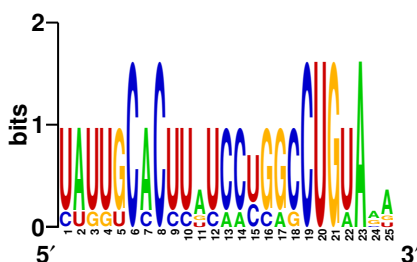

26-mers:

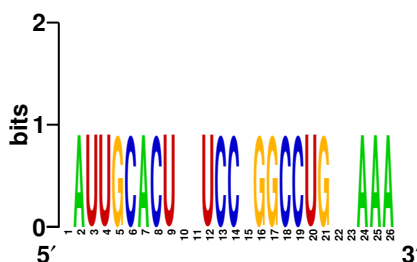

27-mers:

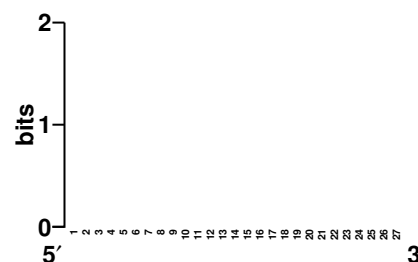

28-mers:

(no read)

29-mers:

(no read)

30-mers:

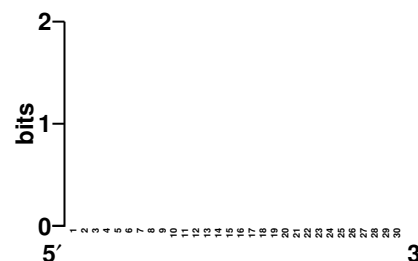

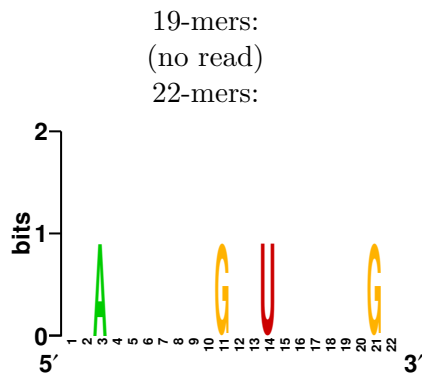

25-mers:  
(no read)  
28-mers:

(no read)

Antisense reads:

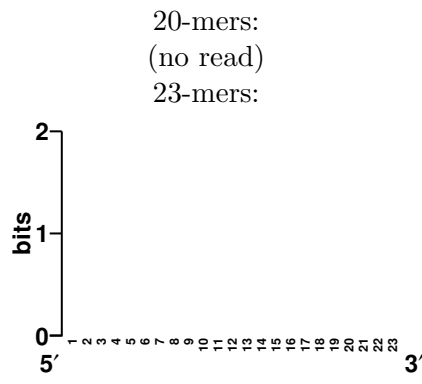

26-mers:  
(no read)  
29-mers:

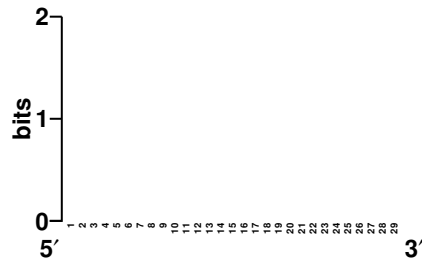

18-mers:  
(no read)  
21-mers:  
(no read)  
24-mers:

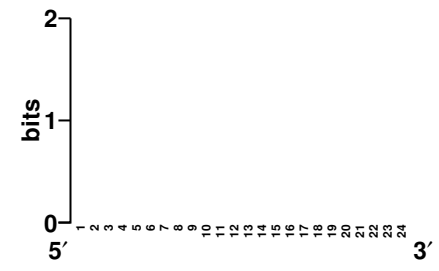

27-mers:  
(no read)  
30-mers:

(no read)



Embryo 15h, library 4:

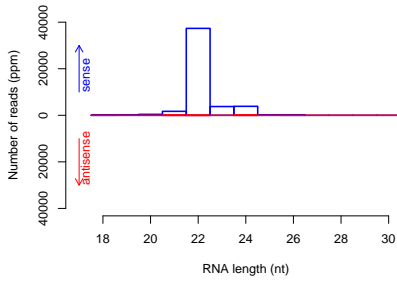

Sense reads:

18-mers:

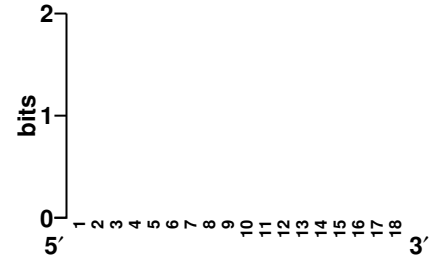

19-mers:

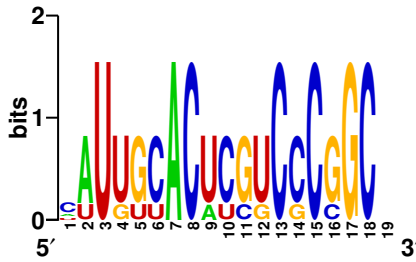

20-mers:

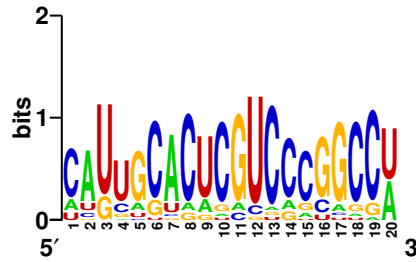

21-mers:

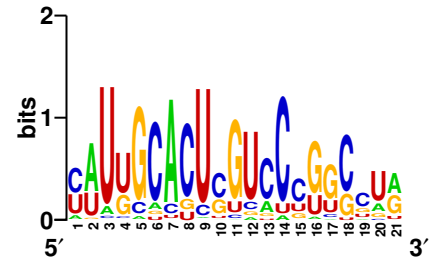

22-mers:

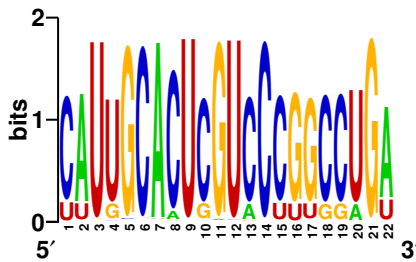

23-mers:

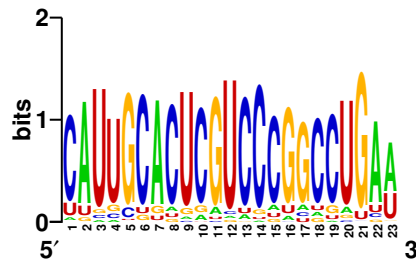

24-mers:

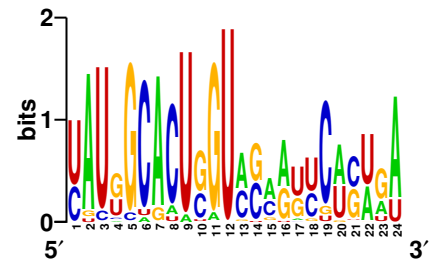

25-mers:

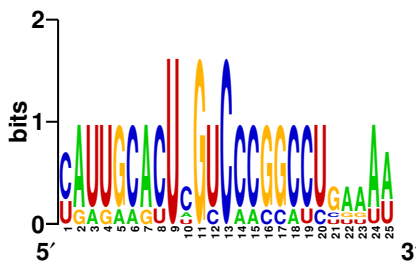

26-mers:



27-mers:

(no read)

28-mers:  
(no read)

29-mers:  
(no read)

30-mers:  
(no read)

Antisense reads:

18-mers:

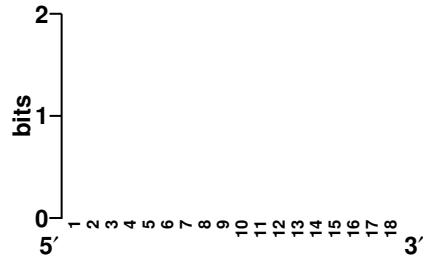

19-mers:

20-mers:

21-mers:

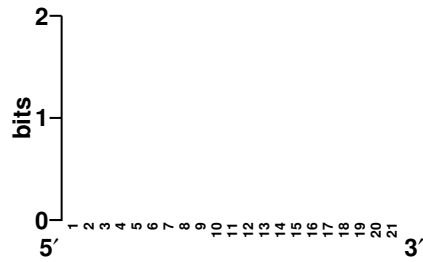

(no read)  
22-mers:

(no read)  
23-mers:

24-mers:

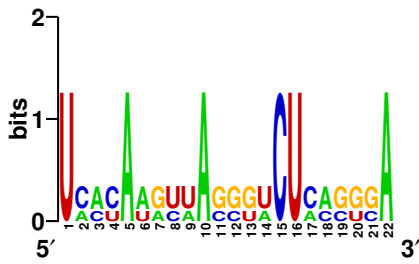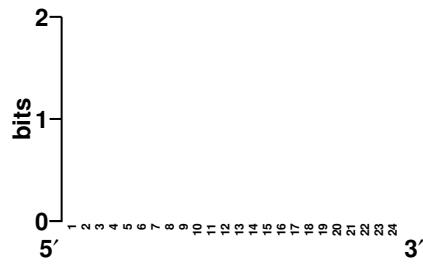

25-mers:  
(no read)  
28-mers:  
(no read)

(no read)  
26-mers:  
(no read)  
29-mers:  
(no read)

27-mers:  
(no read)  
30-mers:  
(no read)

Embryo 36h, library 4:

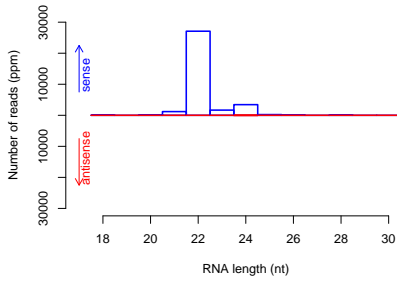

19-mers:

(no read)  
22-mers:

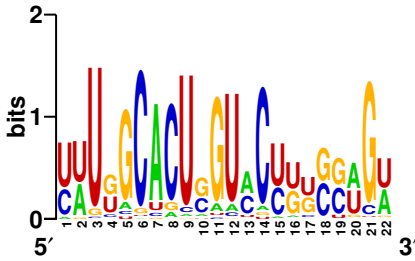

25-mers:

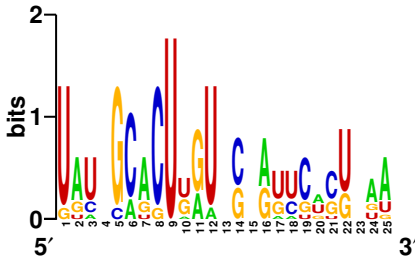

28-mers:

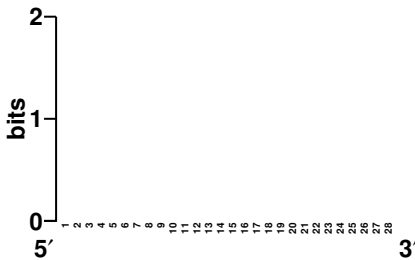

Sense reads:

20-mers:

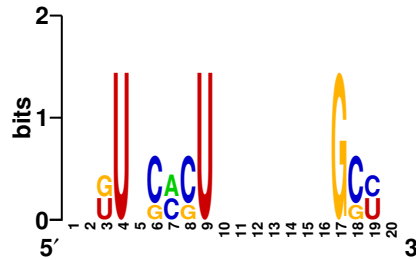

23-mers:

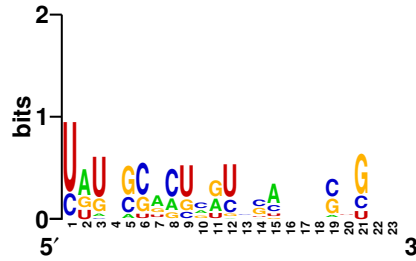

26-mers:

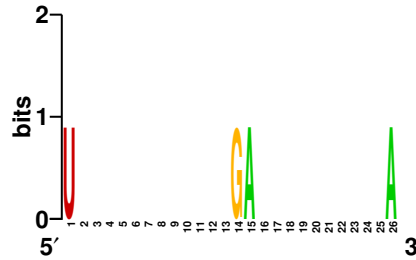

29-mers:

(no read)

18-mers:



21-mers:

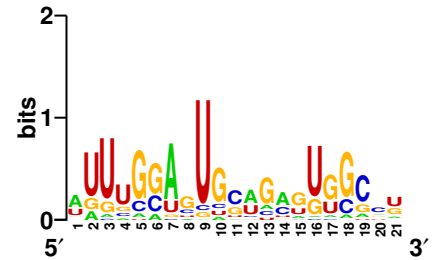

24-mers:

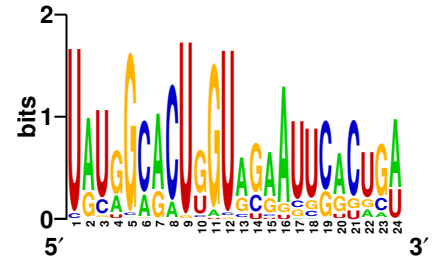

27-mers:

(no read)  
30-mers:

(no read)

Antisense reads:

18-mers:

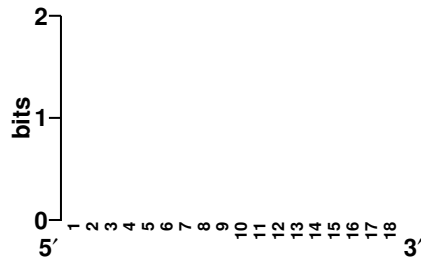

19-mers:  
(no read)

20-mers:  
(no read)

21-mers:  
(no read)

22-mers:

23-mers:

24-mers:

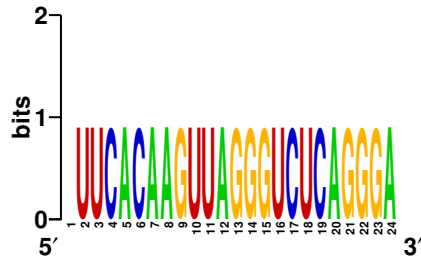

(no read)

(no read)

25-mers:

26-mers:

27-mers:

(no read)

(no read)

(no read)

28-mers:

29-mers:

30-mers:

(no read)

(no read)

(no read)

Embryo 60h, library 4:

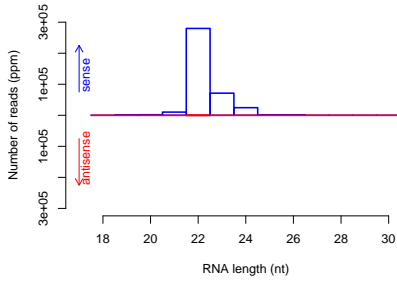

Sense reads:

18-mers:

19-mers:

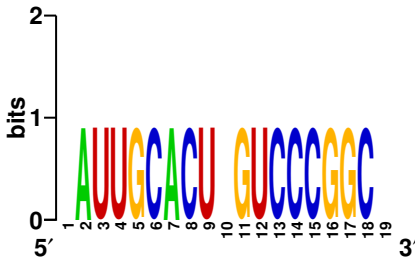

20-mers:

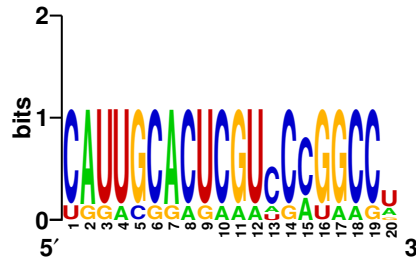

(no read)  
21-mers:

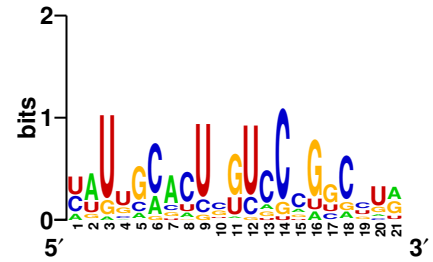

22-mers:

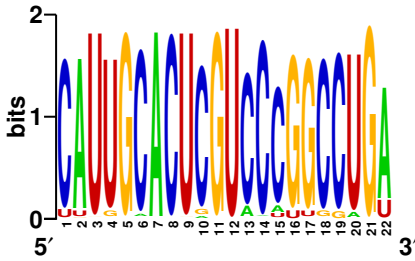

23-mers:

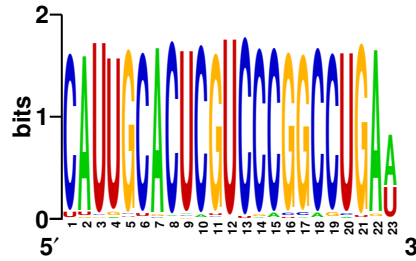

24-mers:

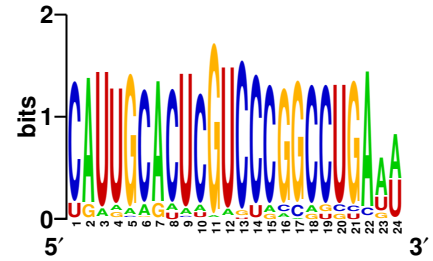

25-mers:

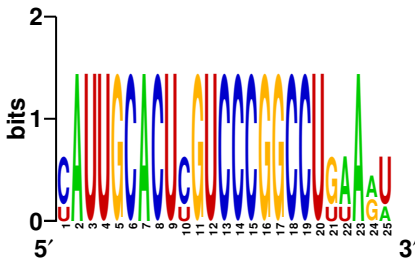

26-mers:



27-mers:

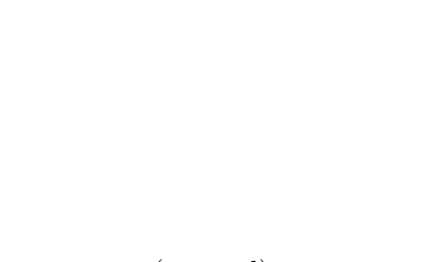

28-mers:  
(no read)

29-mers:  
(no read)

(no read)  
30-mers:  
(no read)

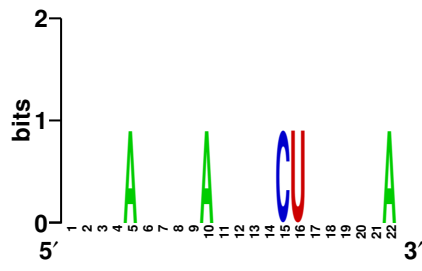

19-mers:  
(no read)  
22-mers:

Antisense reads: 18-mers:  
(no read)  
20-mers: 21-mers:  
(no read) (no read)  
23-mers: 24-mers:

25-mers:  
(no read)  
28-mers:  
(no read)

(no read) (no read)  
26-mers: 27-mers:  
(no read) (no read)  
29-mers: 30-mers:  
(no read) (no read)

Adult female, library 4:

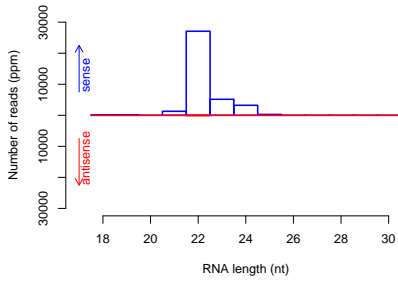

19-mers:

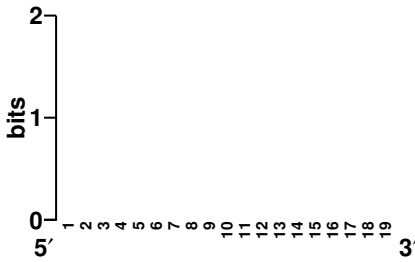

22-mers:

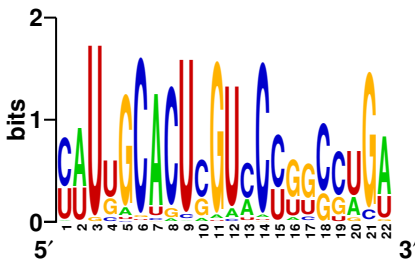

25-mers:

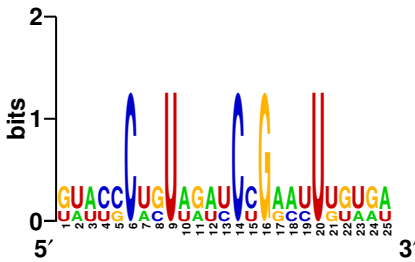

28-mers:  
(no read)

Sense reads:

20-mers:

(no read)  
23-mers:

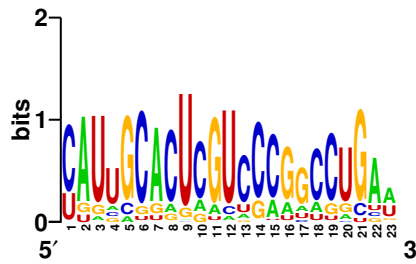

26-mers:

(no read)  
29-mers:  
(no read)

18-mers:

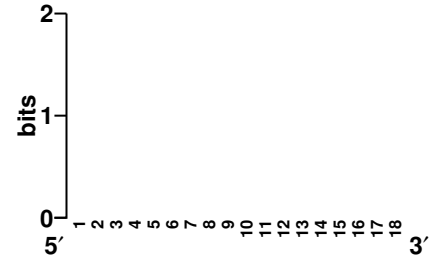

21-mers:

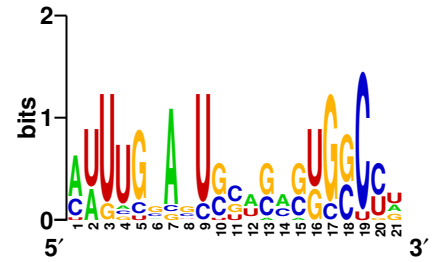

24-mers:

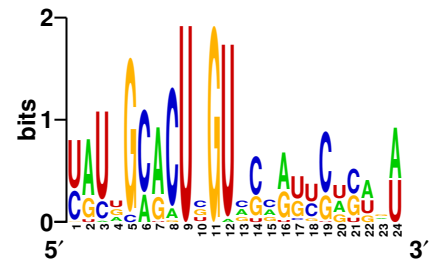

27-mers:

(no read)  
30-mers:  
(no read)

Antisense reads:

18-mers:

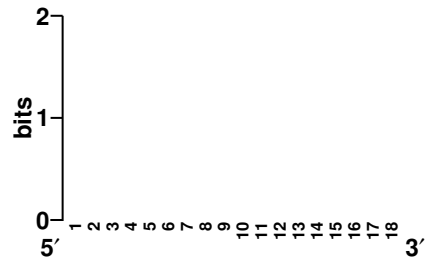

19-mers:  
(no read)  
22-mers:

20-mers:  
(no read)  
23-mers:

21-mers:  
(no read)  
24-mers:

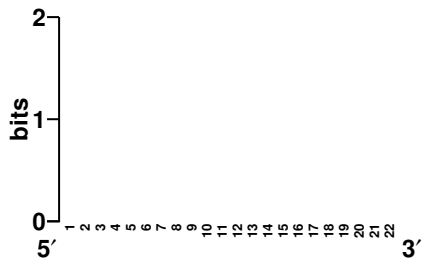

25-mers:  
(no read)  
28-mers:  
(no read)

(no read)  
26-mers:  
(no read)  
29-mers:  
(no read)

(no read)  
27-mers:  
(no read)  
30-mers:  
(no read)



Adult male, library 4:

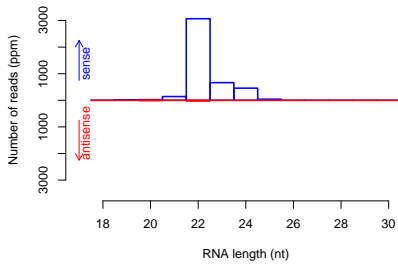

Sense reads:

18-mers:

19-mers:

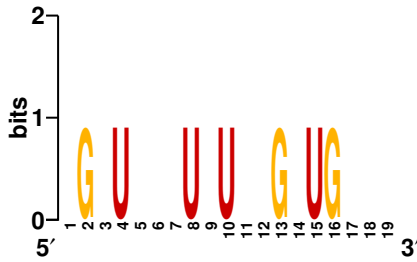

20-mers:

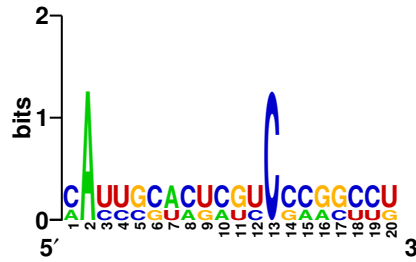

(no read)  
21-mers:

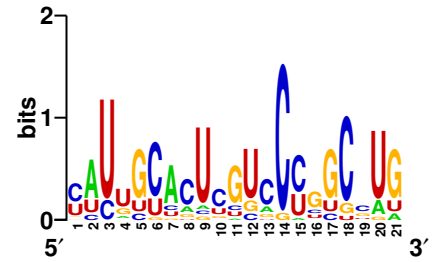

22-mers:

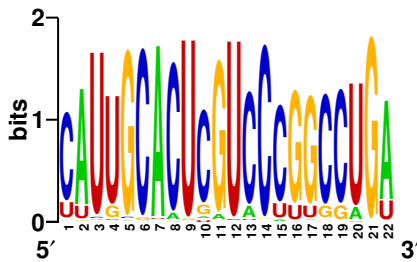

23-mers:

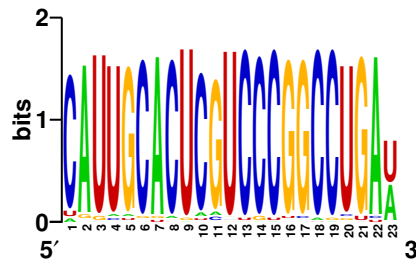

24-mers:

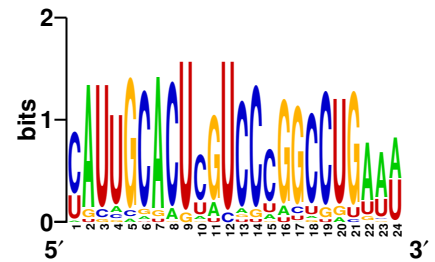

25-mers:

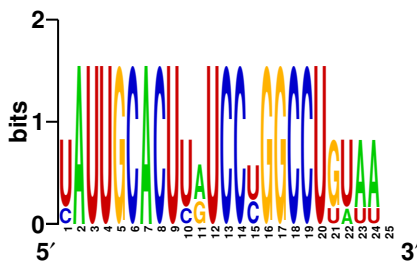

26-mers:

(no read)

(no read)

28-mers:  
(no read)

29-mers:  
(no read)

30-mers:  
(no read)

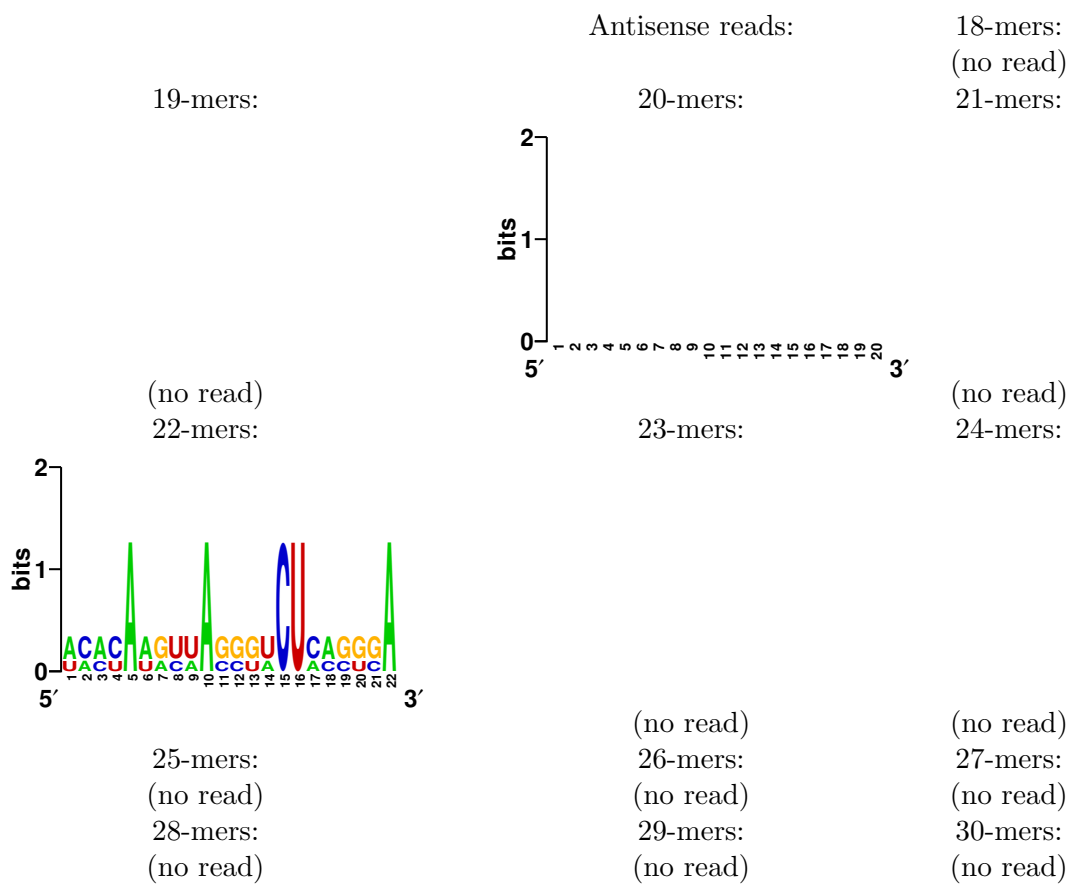

### 3 Transcriptome-matching reads (excluding pre-miRNA and abundant ncRNA-matching reads)

#### 3.1 Libraries #1 (total 5' monophosphorylated small RNAs)

Embryo 8h, library 1:

Sense reads:

18-mers:

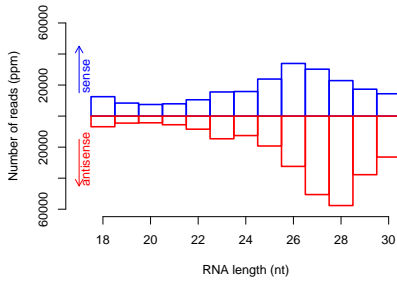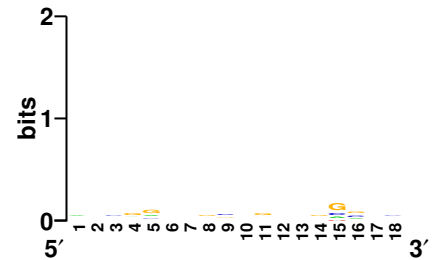

19-mers:

20-mers:

21-mers:

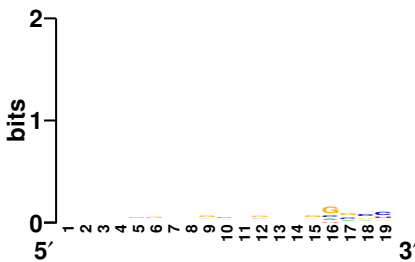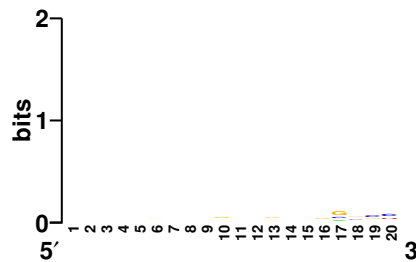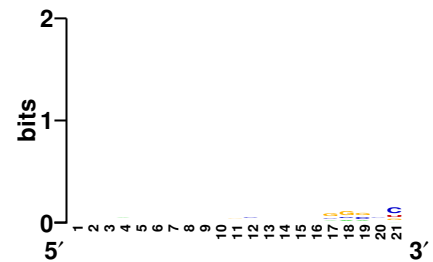

22-mers:

23-mers:

24-mers:

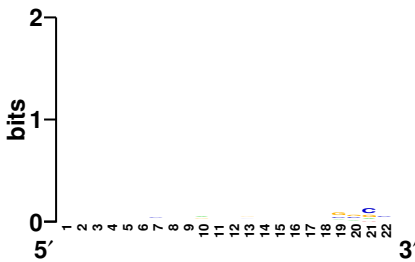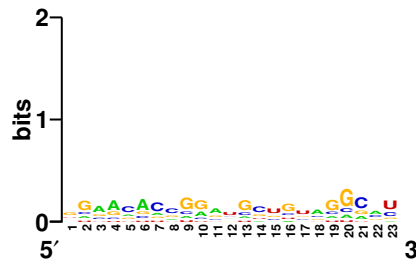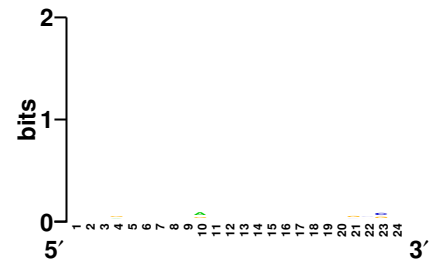

25-mers:

26-mers:

27-mers:

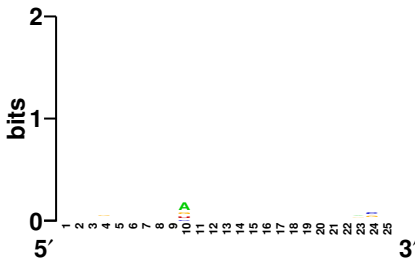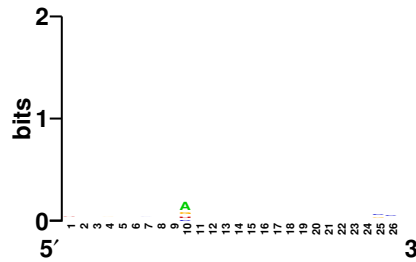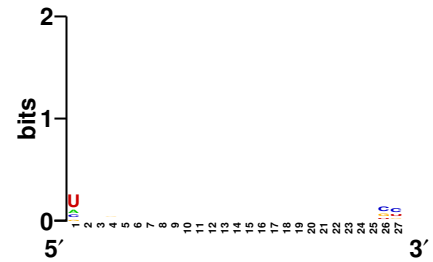

28-mers:

29-mers:

30-mers:

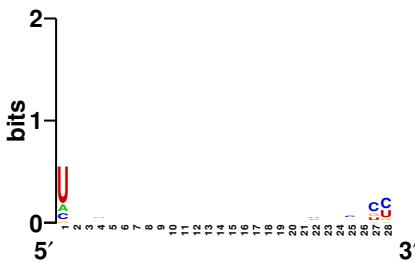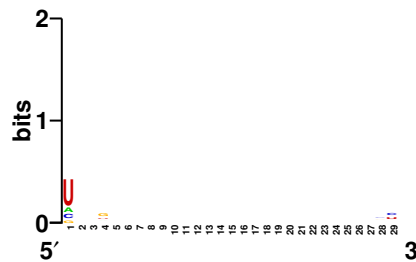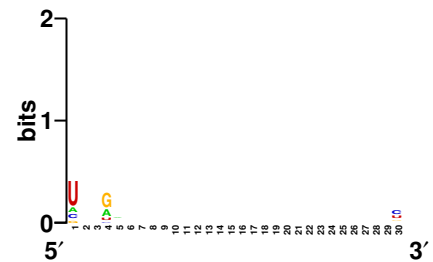

Antisense reads:

18-mers:

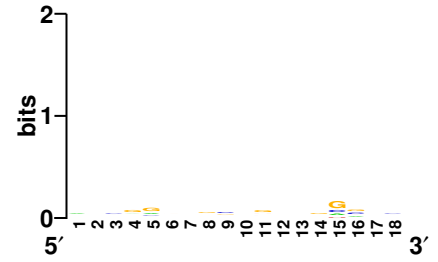

19-mers:

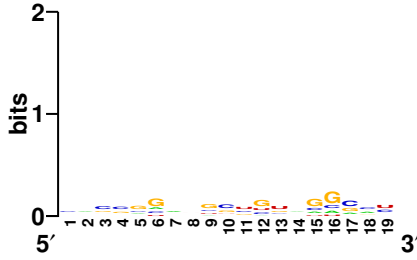

20-mers:

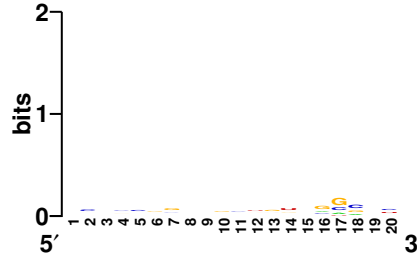

21-mers:

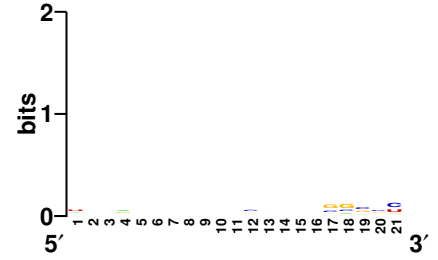

22-mers:

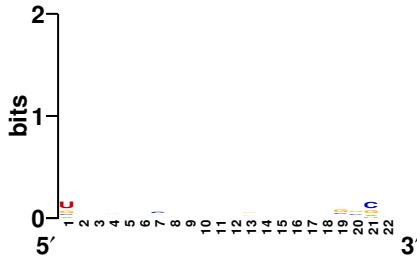

23-mers:

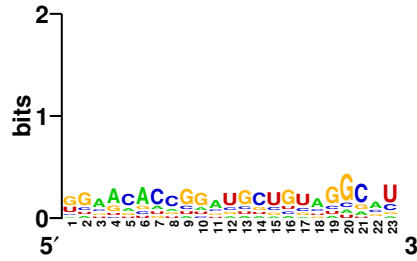

24-mers:

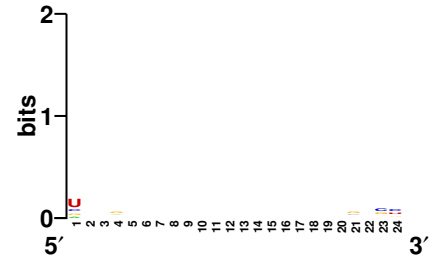

25-mers:

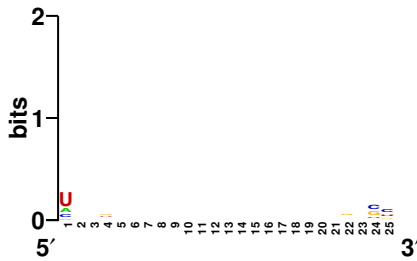

26-mers:

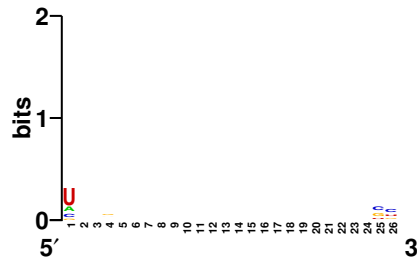

27-mers:

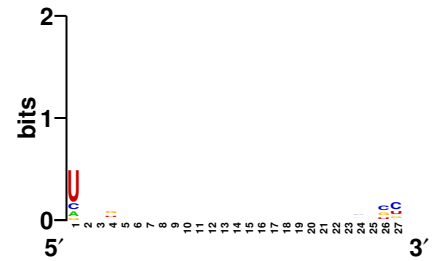

28-mers:

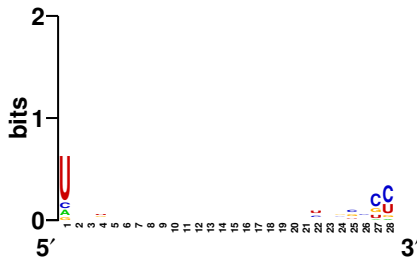

29-mers:

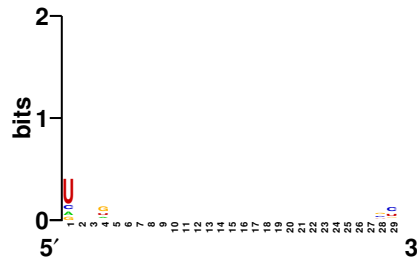

30-mers:

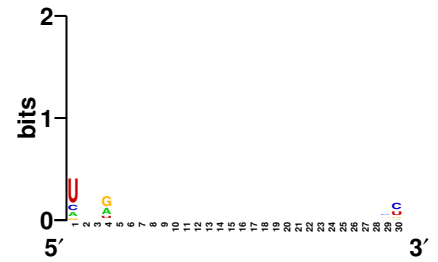

Embryo 15h, library 1:

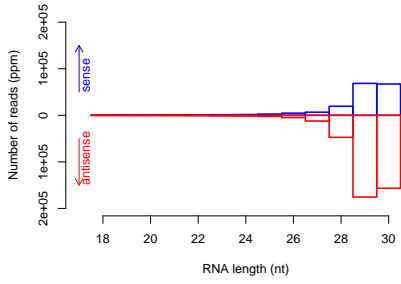

Sense reads:

18-mers:

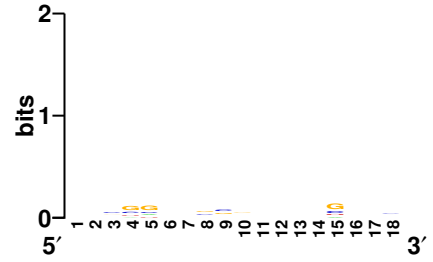

19-mers:

20-mers:

21-mers:

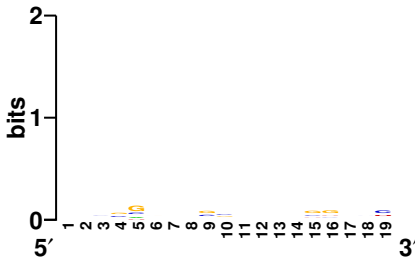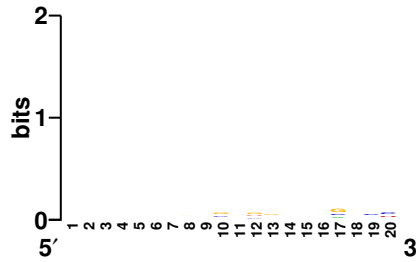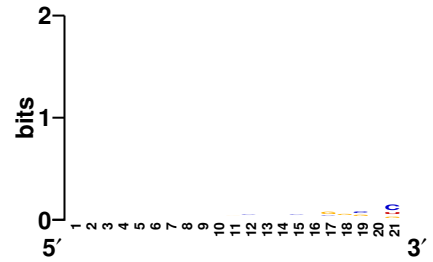

22-mers:

23-mers:

24-mers:

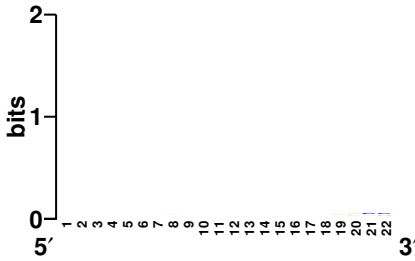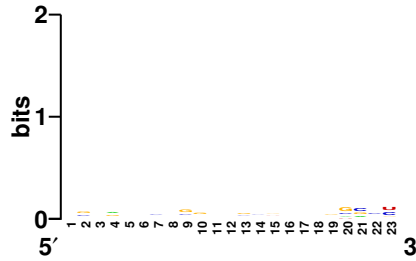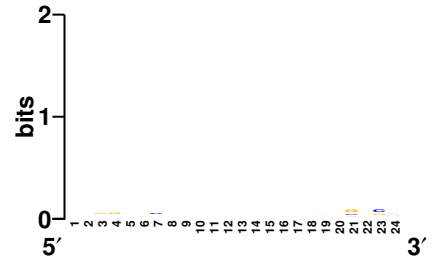

25-mers:

26-mers:

27-mers:

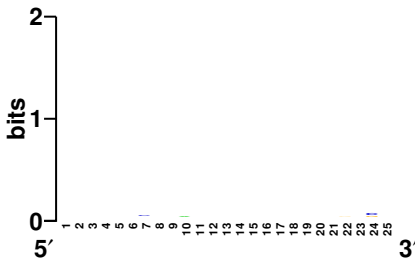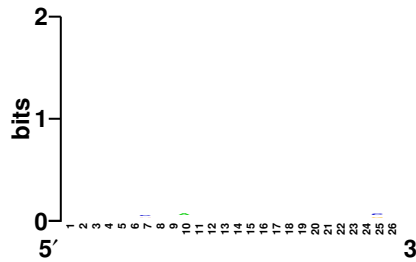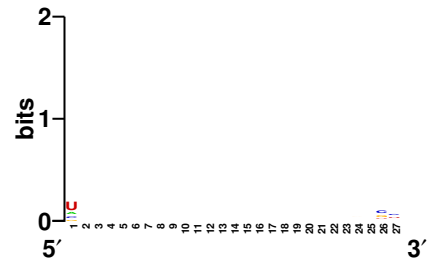

28-mers:

29-mers:

30-mers:

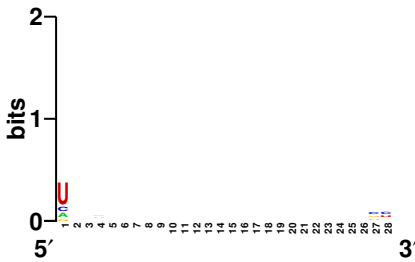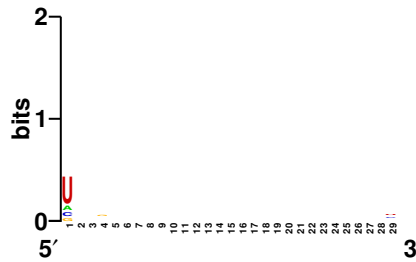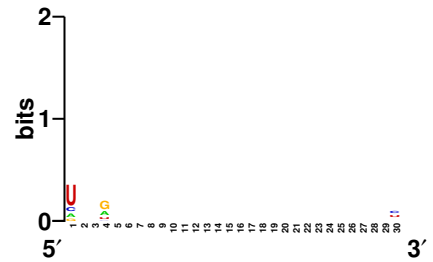



Embryo 36h, library 1:

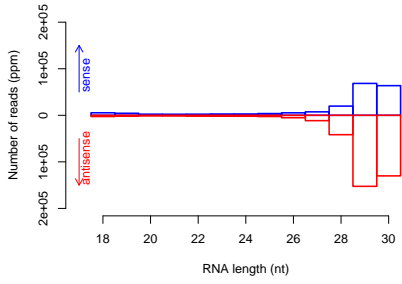

Sense reads:

18-mers:

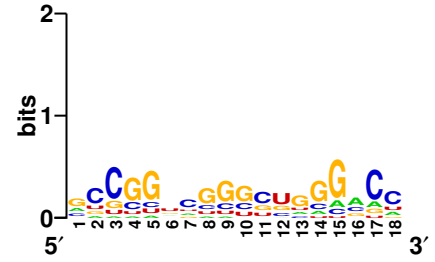

19-mers:

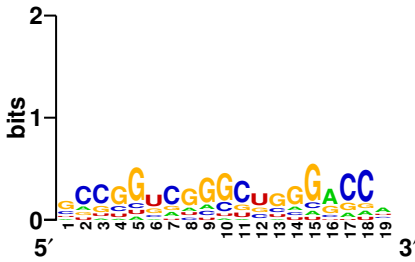

20-mers:

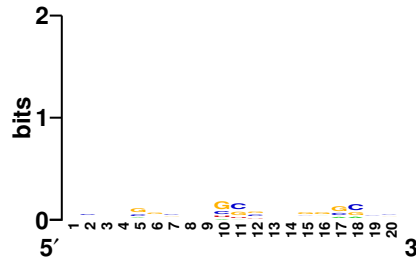

21-mers:

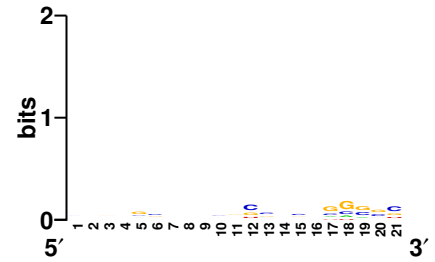

22-mers:

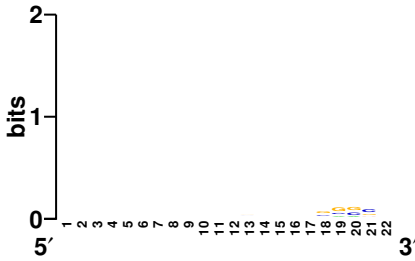

23-mers:

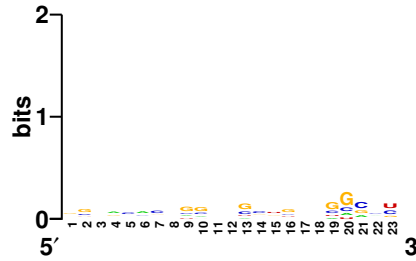

24-mers:

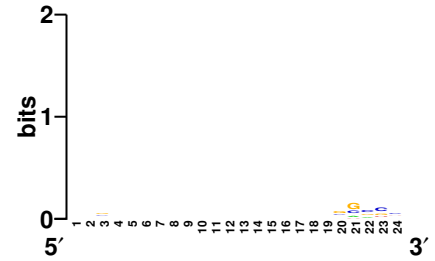

25-mers:

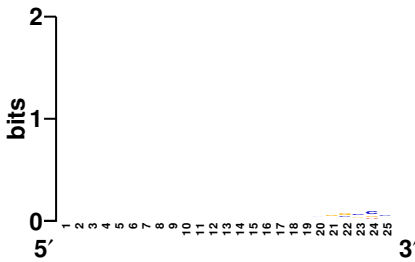

26-mers:

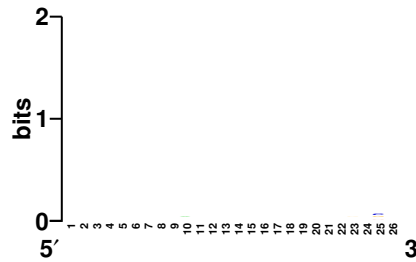

27-mers:

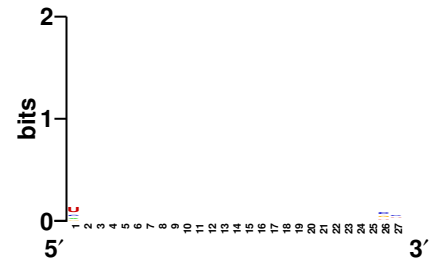

28-mers:

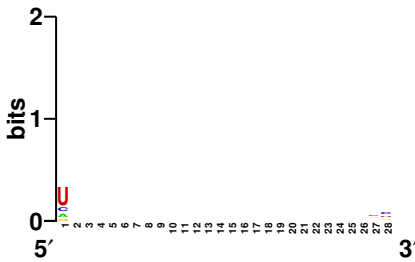

29-mers:

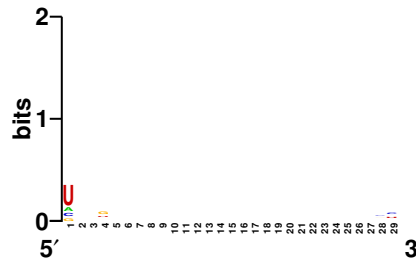

30-mers:

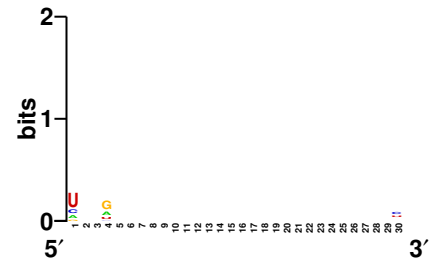

Antisense reads:

18-mers:

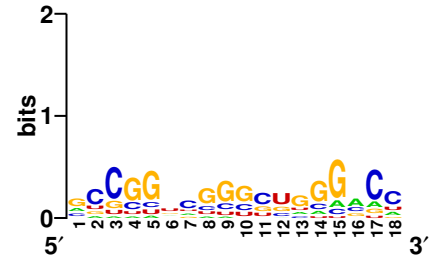

19-mers:

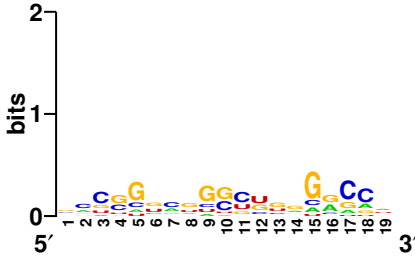

20-mers:

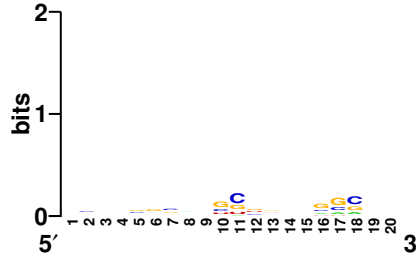

21-mers:

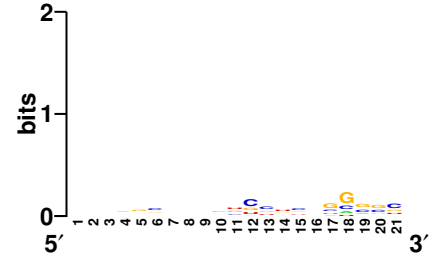

22-mers:

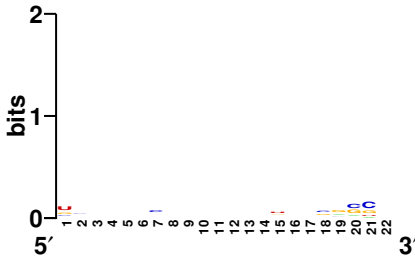

23-mers:

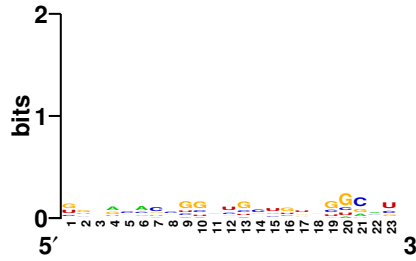

24-mers:

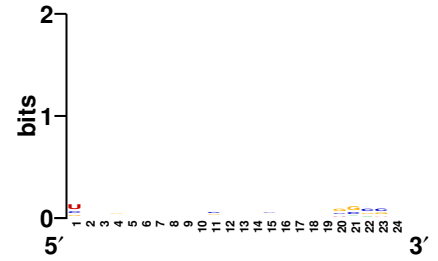

25-mers:

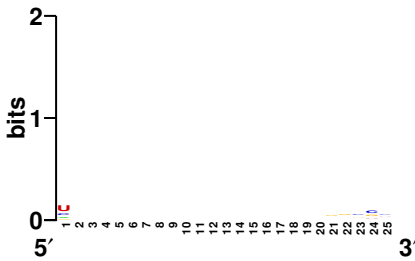

26-mers:

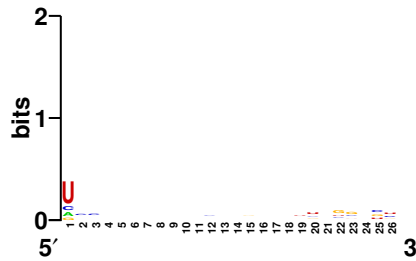

27-mers:

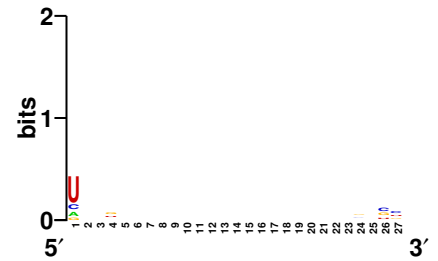

28-mers:

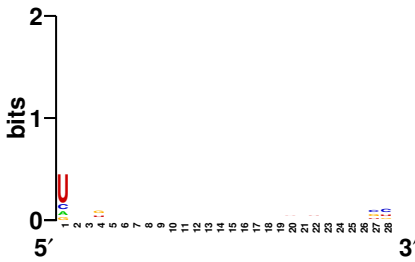

29-mers:

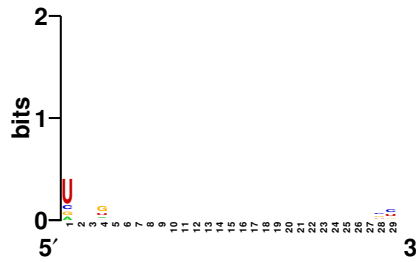

30-mers:

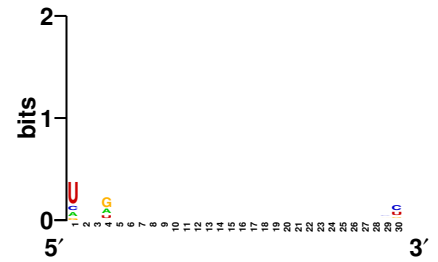



Embryo 60h, library 1:

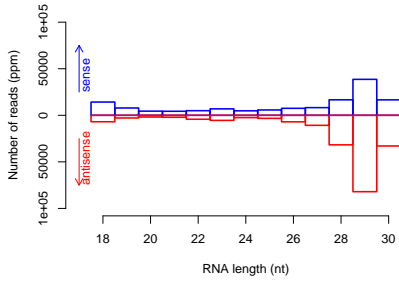

Sense reads:

18-mers:

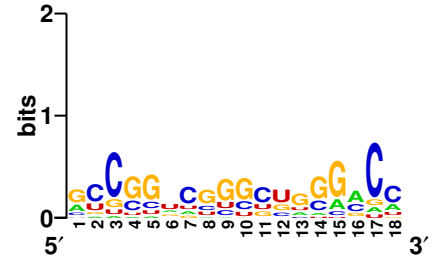

19-mers:

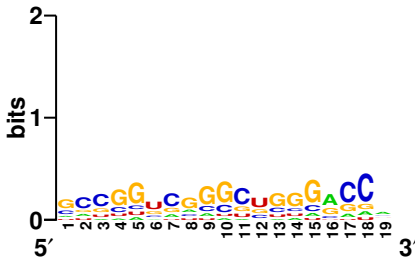

20-mers:

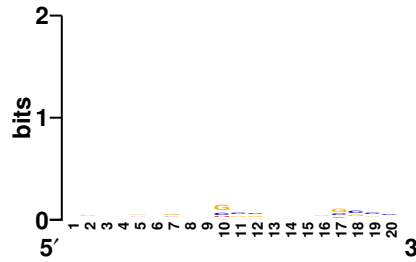

21-mers:

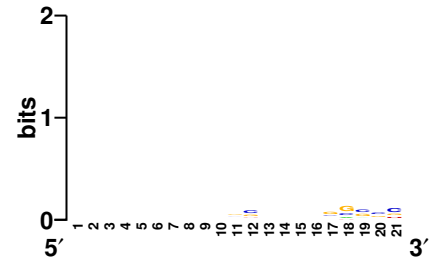

22-mers:

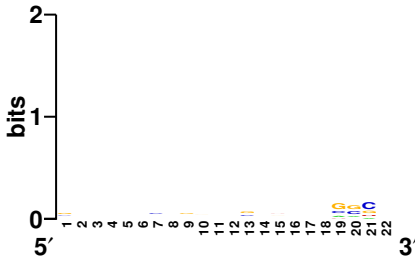

23-mers:

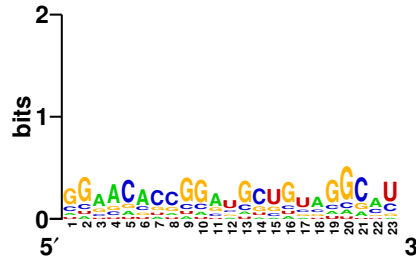

24-mers:

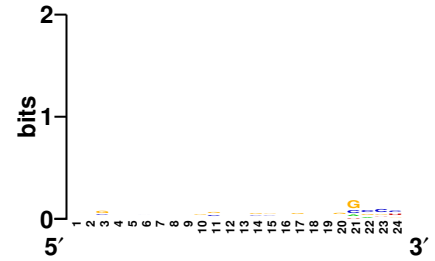

25-mers:

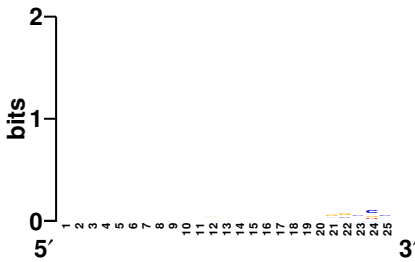

26-mers:

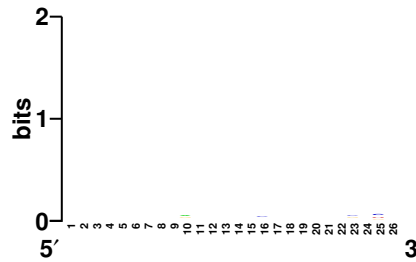

27-mers:

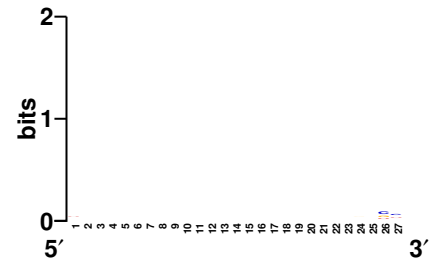

28-mers:

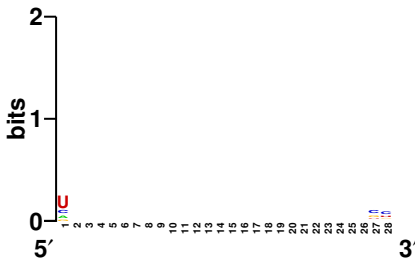

29-mers:

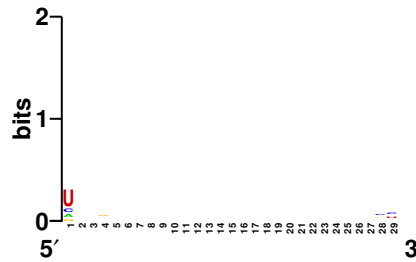

30-mers:

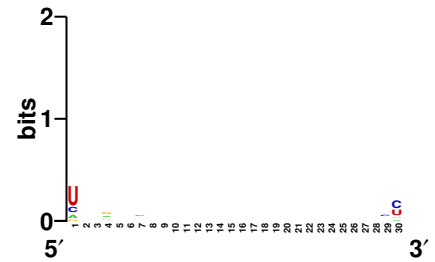

Antisense reads:

18-mers:

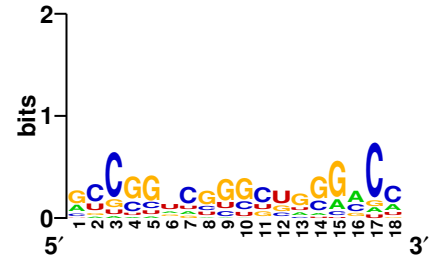

19-mers:

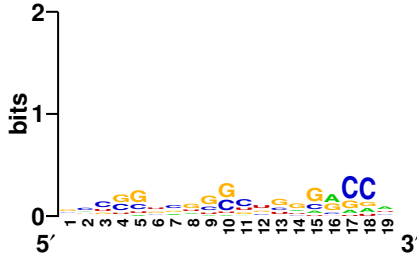

20-mers:

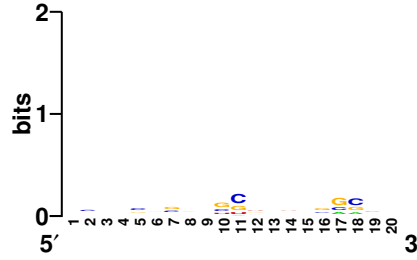

21-mers:

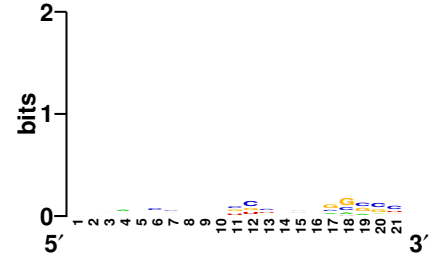

22-mers:

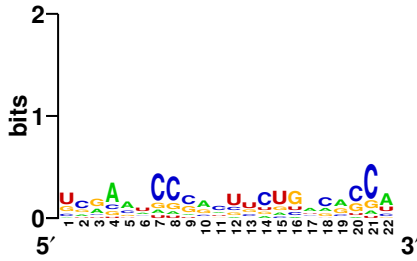

23-mers:

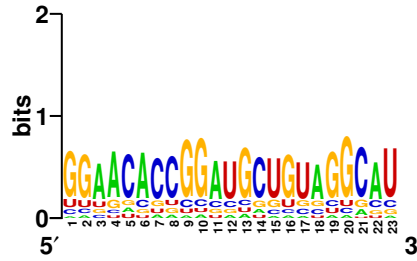

24-mers:

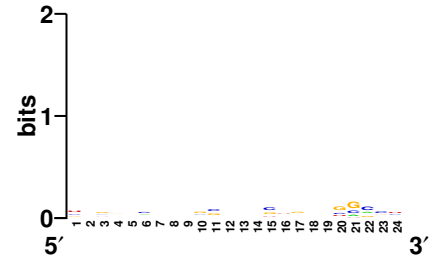

25-mers:

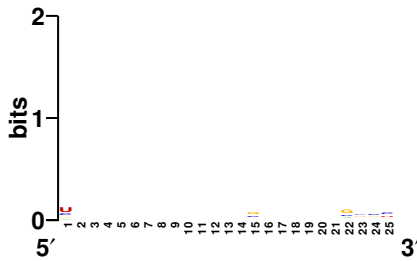

26-mers:

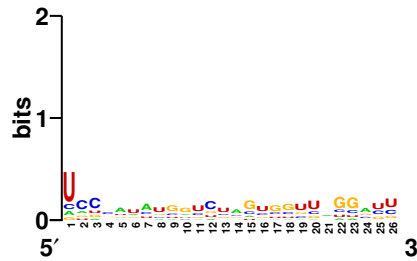

27-mers:

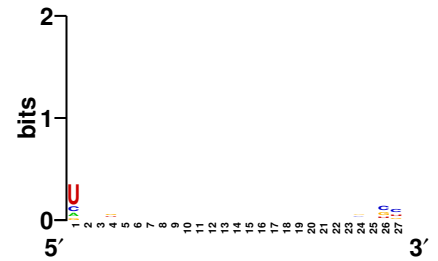

28-mers:

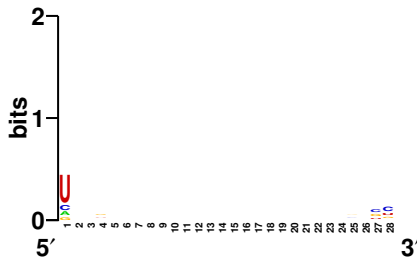

29-mers:

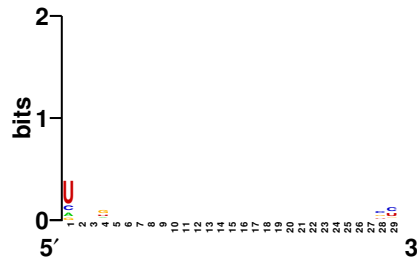

30-mers:

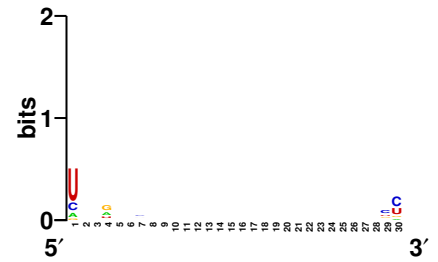

Adult female, library 1:

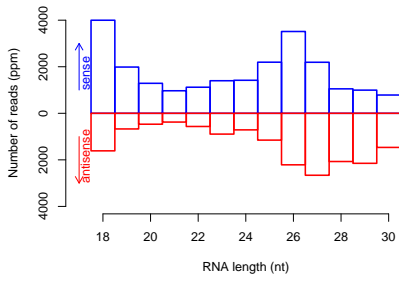

Sense reads:

18-mers:

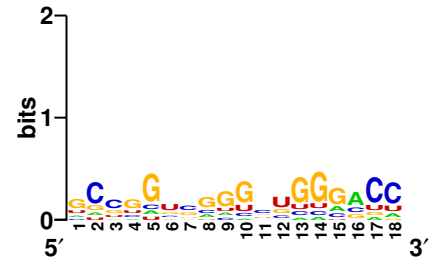

19-mers:

20-mers:

21-mers:

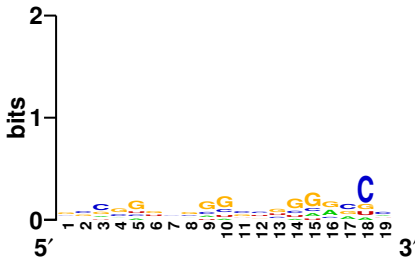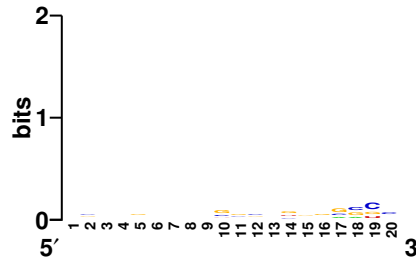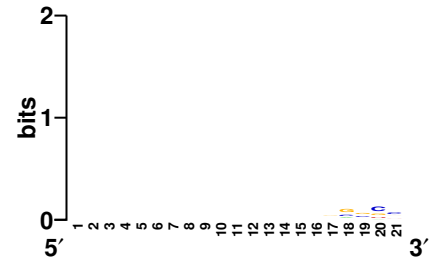

22-mers:

23-mers:

24-mers:

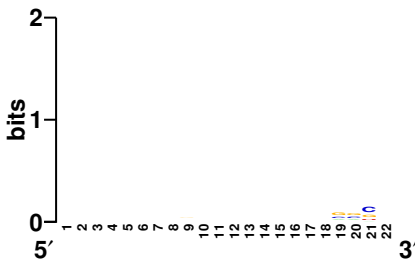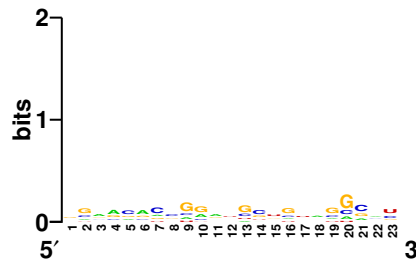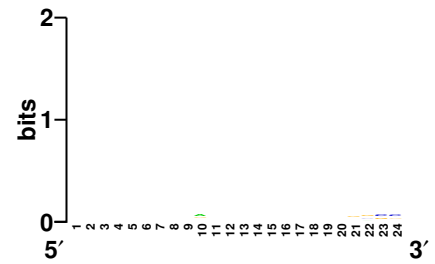

25-mers:

26-mers:

27-mers:

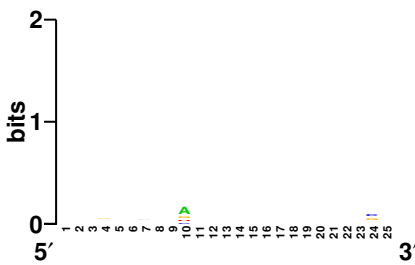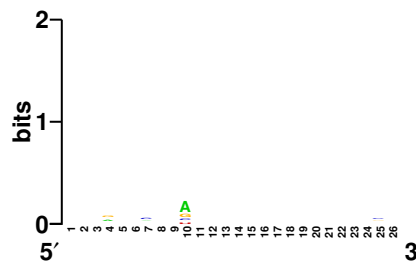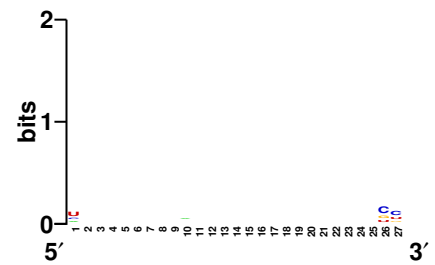

28-mers:

29-mers:

30-mers:

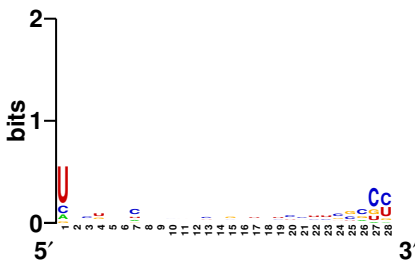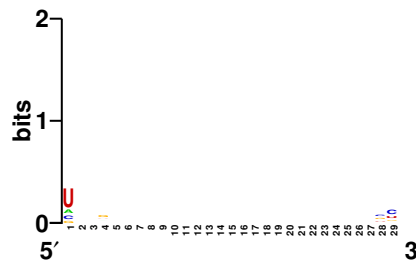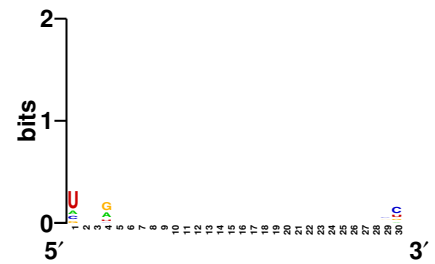

Antisense reads:

18-mers:

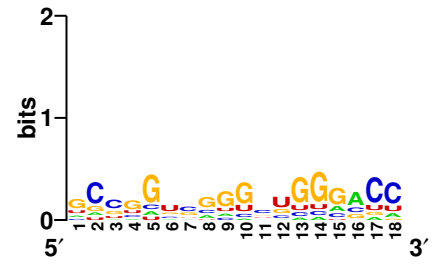

19-mers:

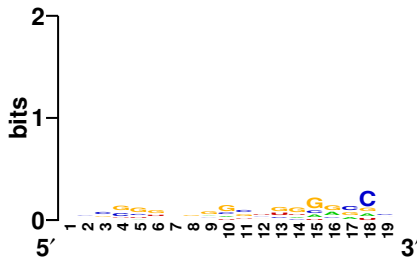

20-mers:

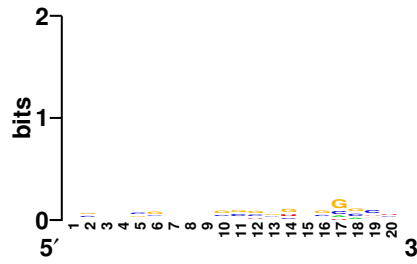

21-mers:

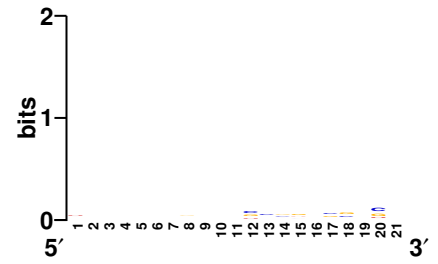

22-mers:

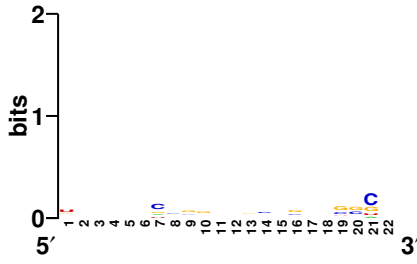

23-mers:

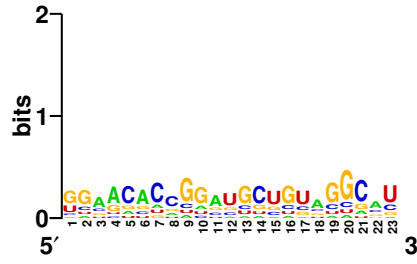

24-mers:

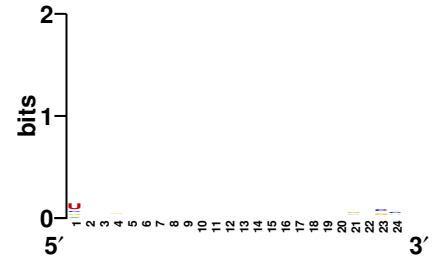

25-mers:

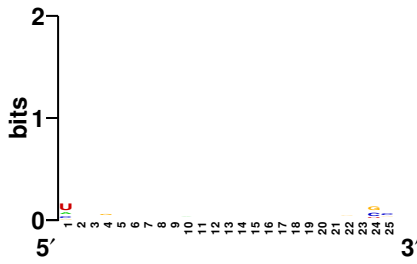

26-mers:

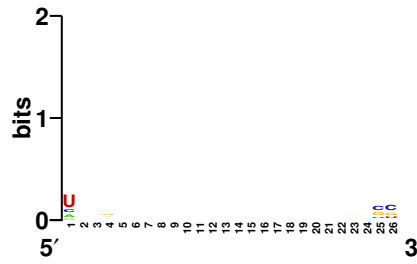

27-mers:

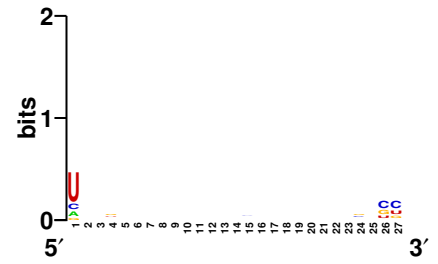

28-mers:

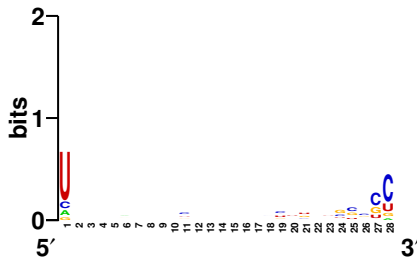

29-mers:

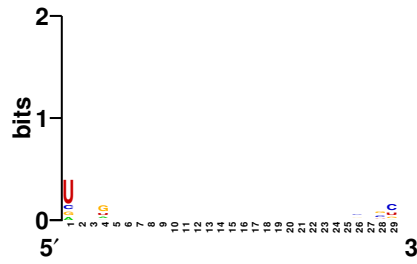

30-mers:

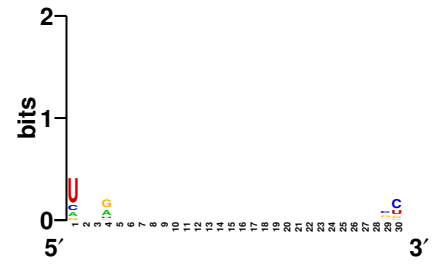

Adult male, library 1:

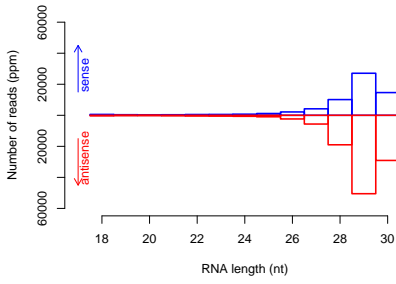

Sense reads:

18-mers:

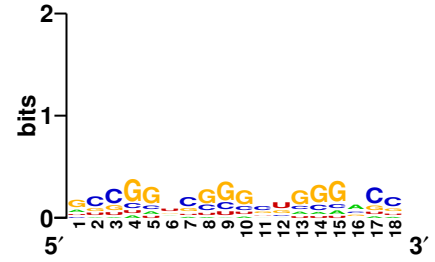

19-mers:

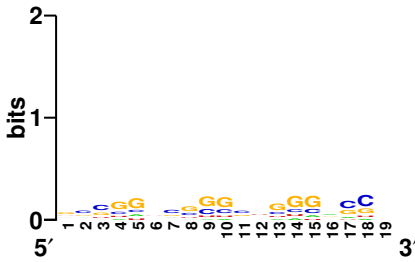

20-mers:

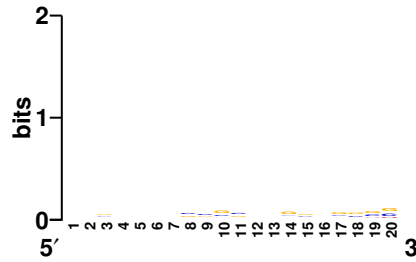

21-mers:

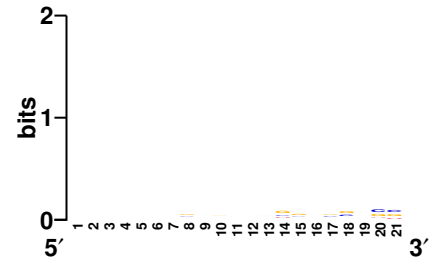

22-mers:

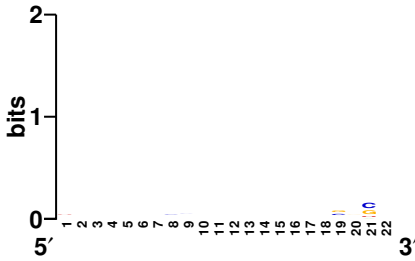

23-mers:

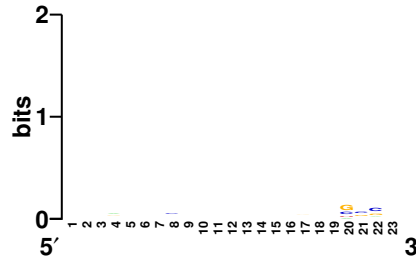

24-mers:

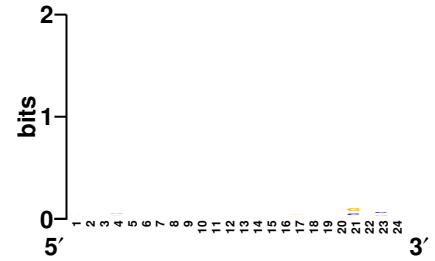

25-mers:

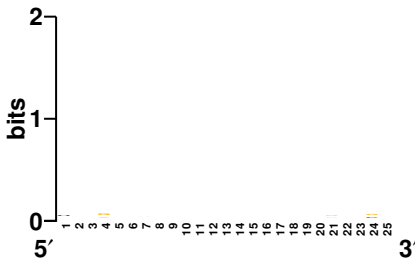

26-mers:

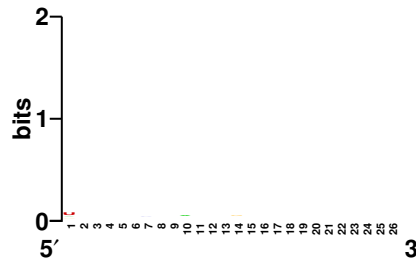

27-mers:

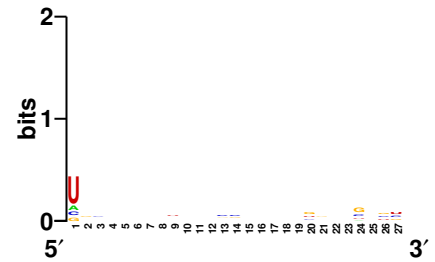

28-mers:

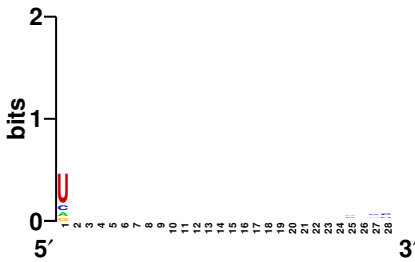

29-mers:

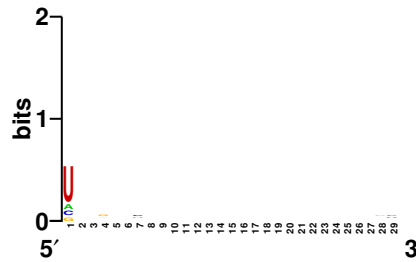

30-mers:

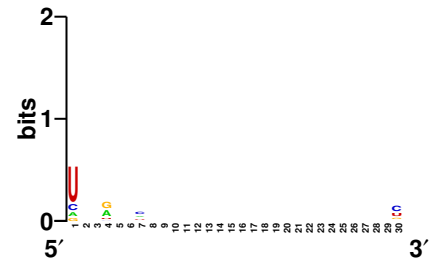



### 3.2 Libraries #2 (3' modified, 5' monophosphorylated small RNAs)

Embryo 8h, library 2:

Sense reads:

18-mers:

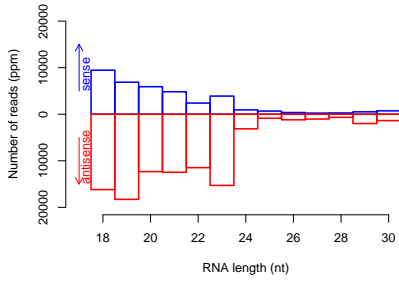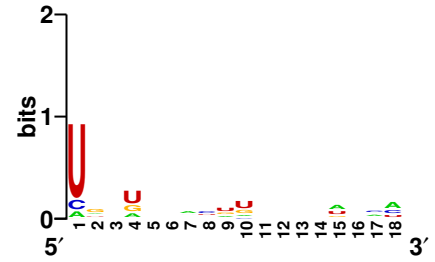

19-mers:

20-mers:

21-mers:

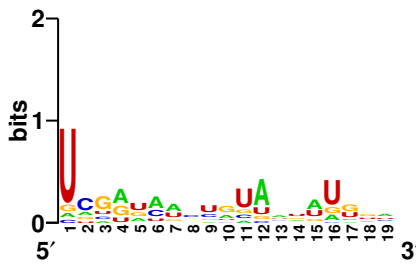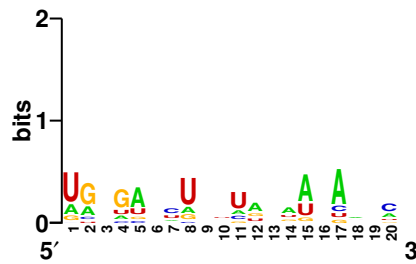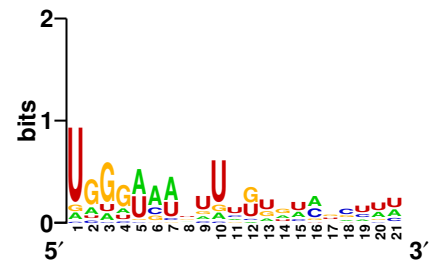

22-mers:

23-mers:

24-mers:

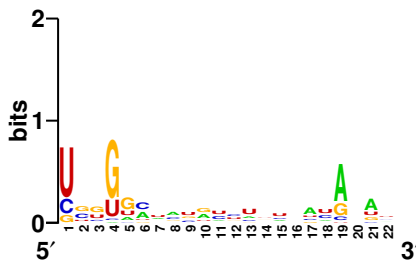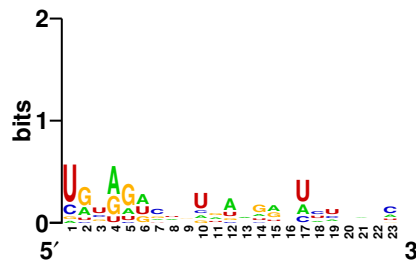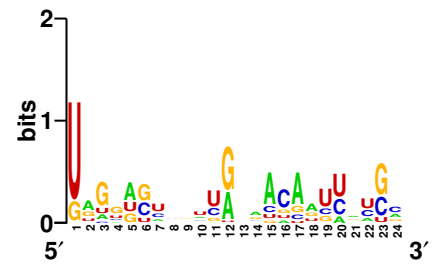

25-mers:

26-mers:

27-mers:

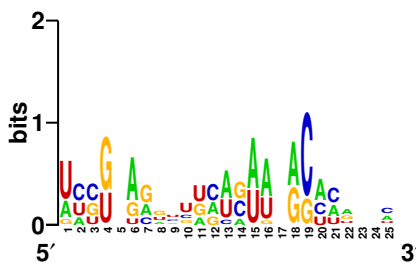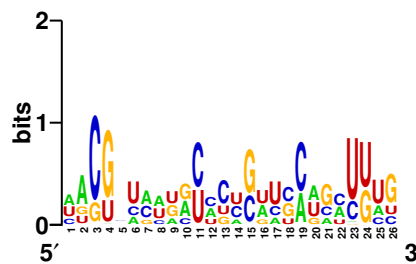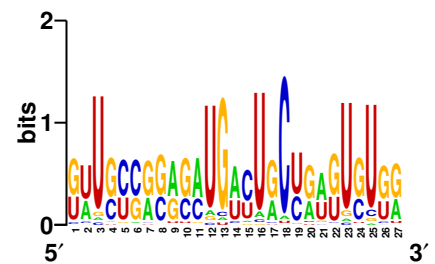

28-mers:

29-mers:

30-mers:

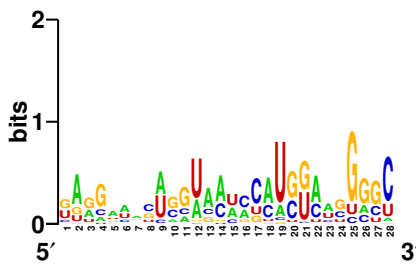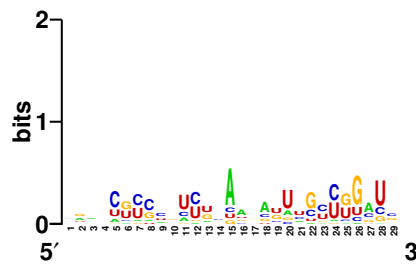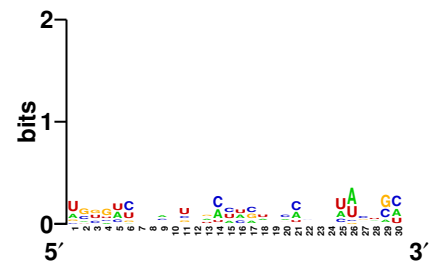









Embryo 36h, library 2:

Sense reads:

18-mers:

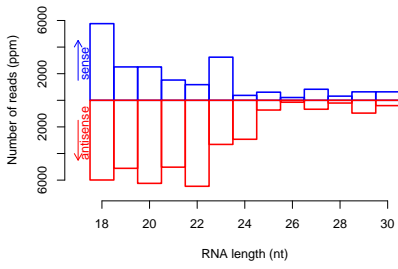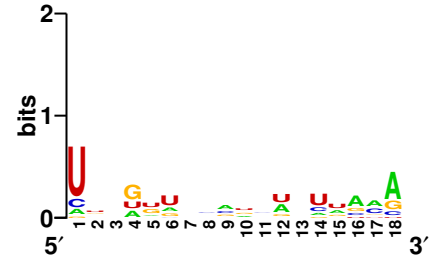

19-mers:

20-mers:

21-mers:

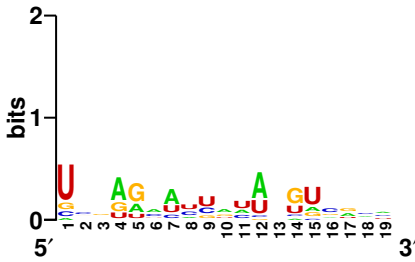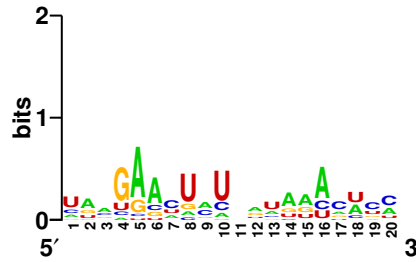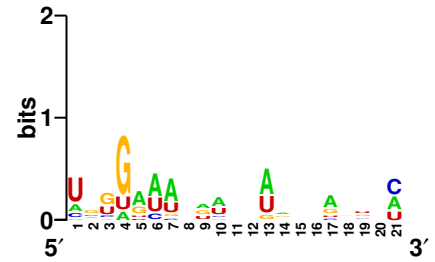

22-mers:

23-mers:

24-mers:

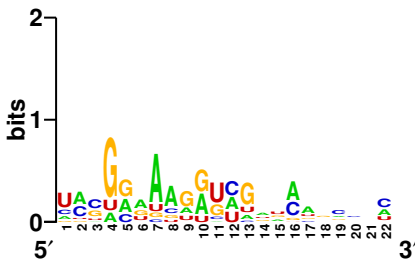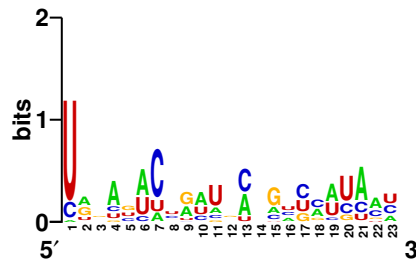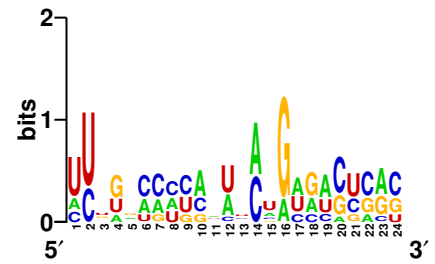

25-mers:

26-mers:

27-mers:

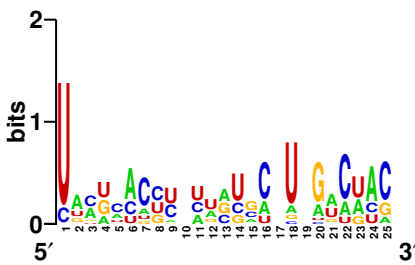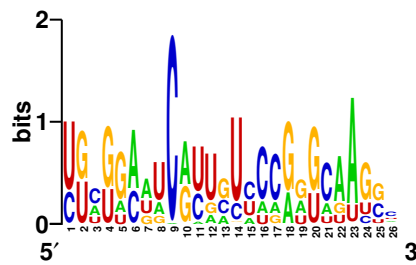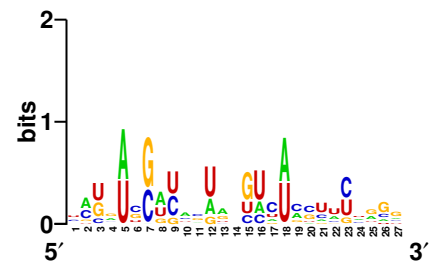

28-mers:

29-mers:

30-mers:

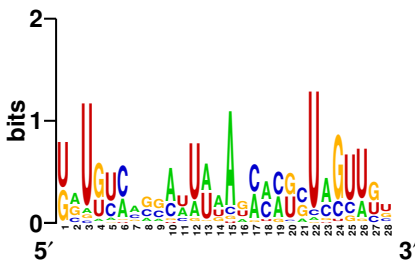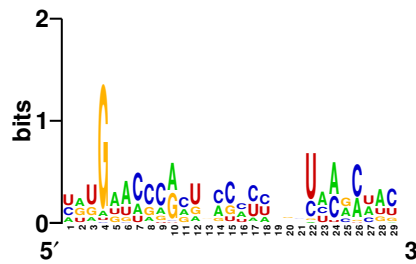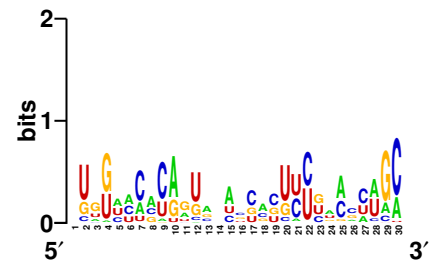

Antisense reads:

18-mers:

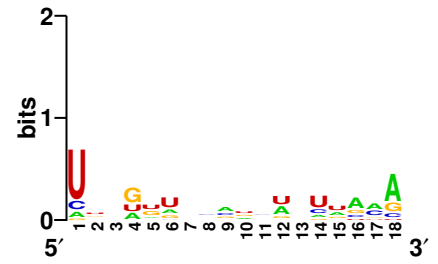

19-mers:

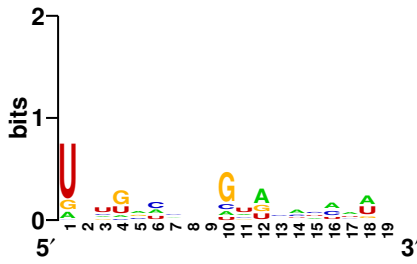

20-mers:

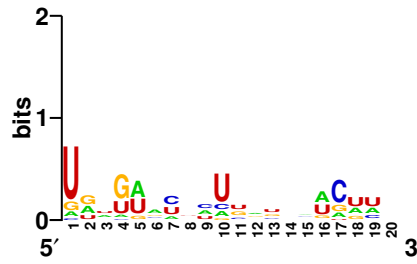

21-mers:

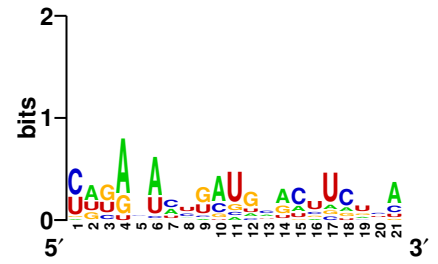

22-mers:

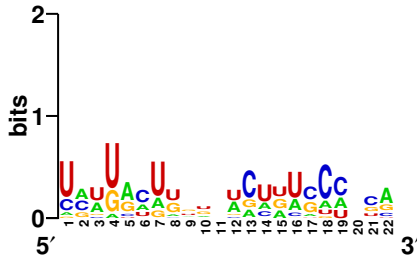

23-mers:

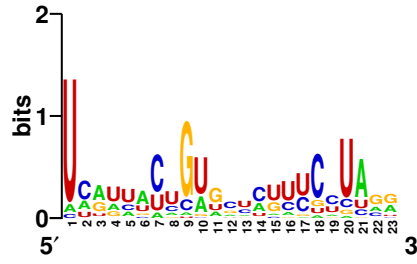

24-mers:

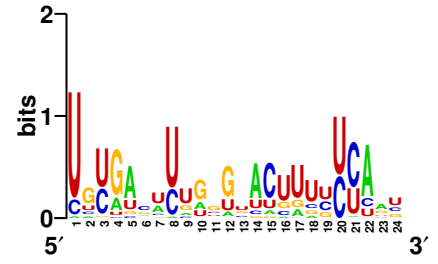

25-mers:

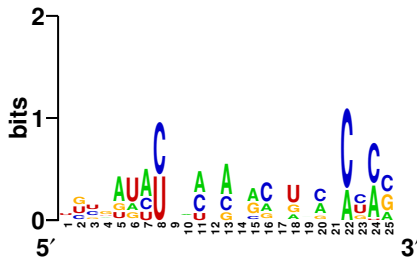

26-mers:

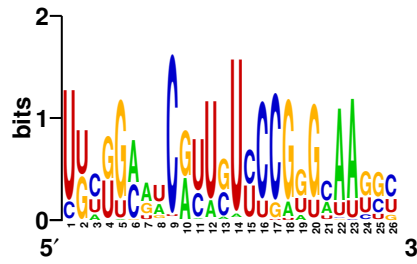

27-mers:

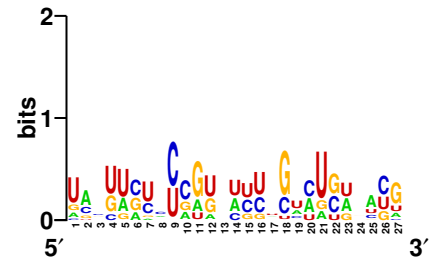

28-mers:

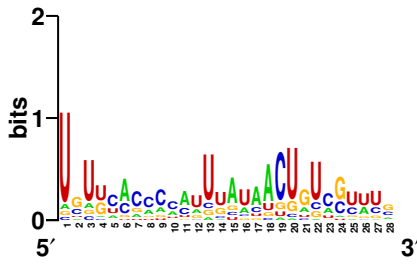

29-mers:

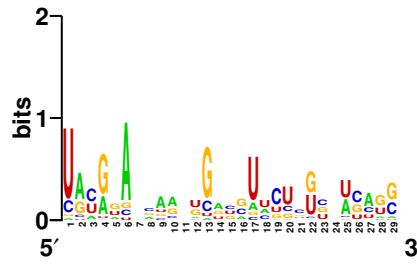

30-mers:

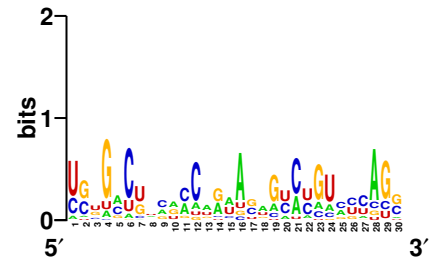





Adult female, library 2:

Sense reads:

18-mers:

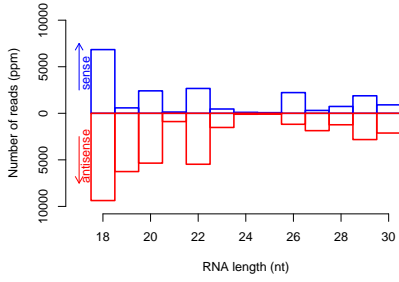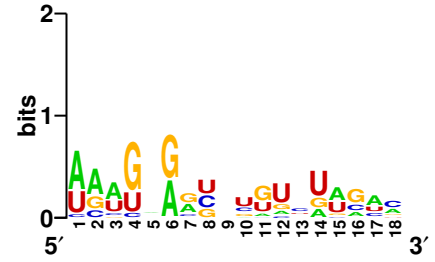

19-mers:

20-mers:

21-mers:

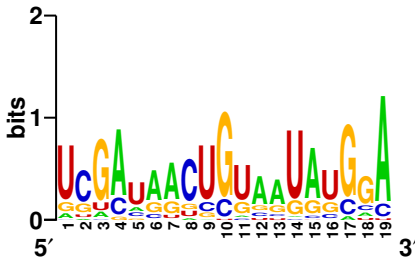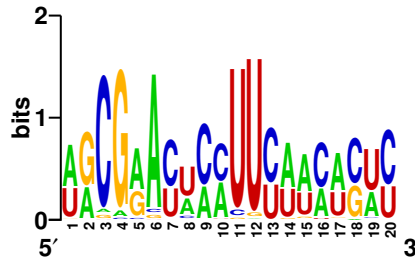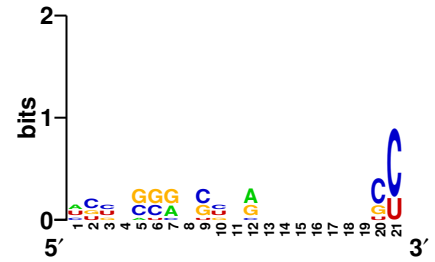

22-mers:

23-mers:

24-mers:

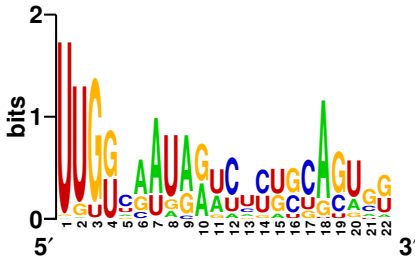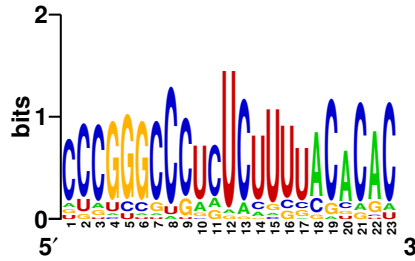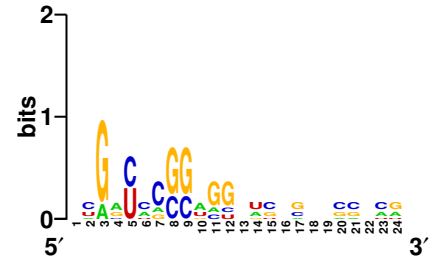

25-mers:

26-mers:

27-mers:

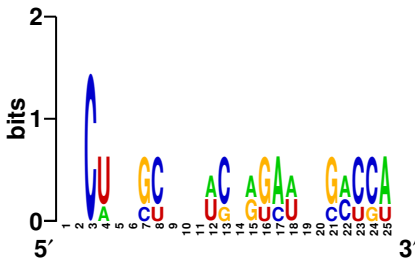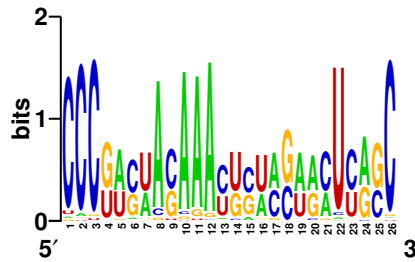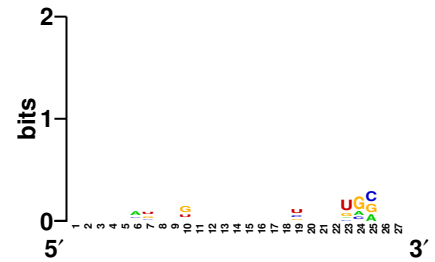

28-mers:

29-mers:

30-mers:

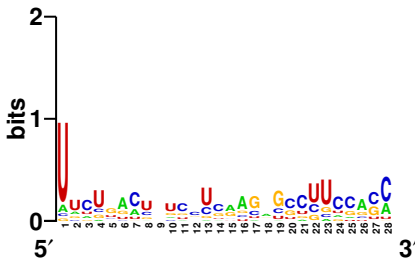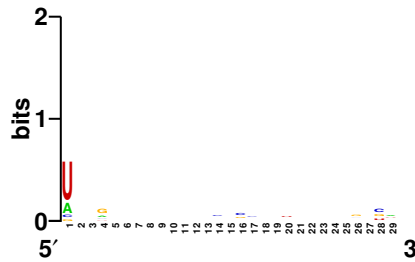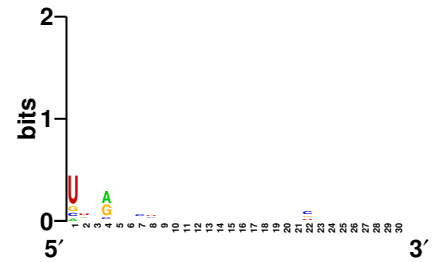





Adult male, library 2:

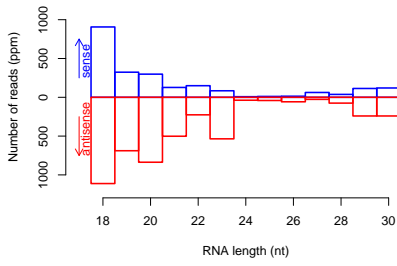

Sense reads:

18-mers:

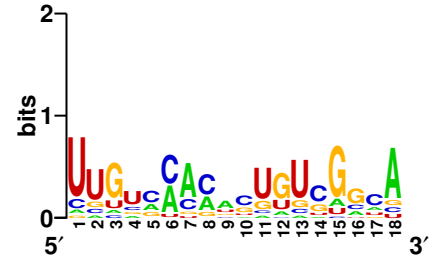

19-mers:

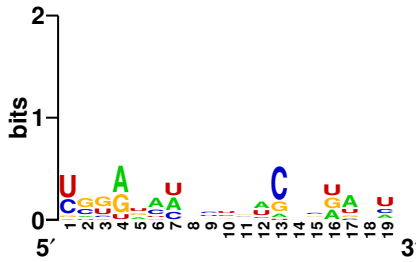

20-mers:

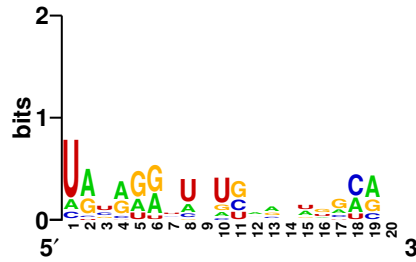

21-mers:

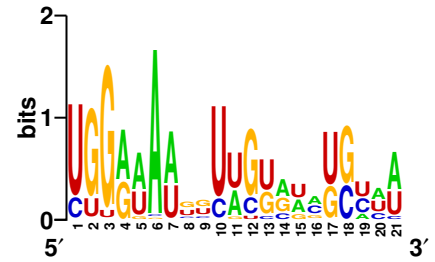

22-mers:

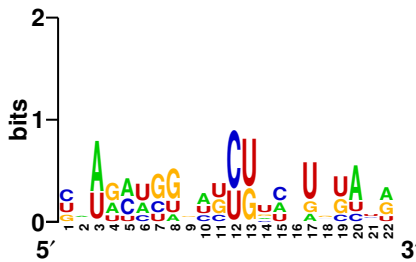

23-mers:

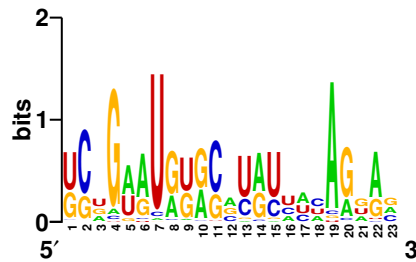

24-mers:

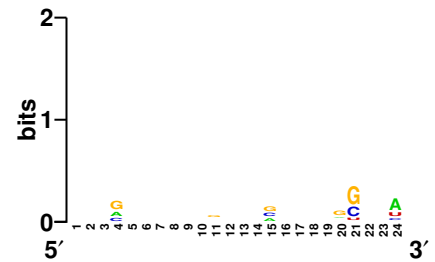

25-mers:

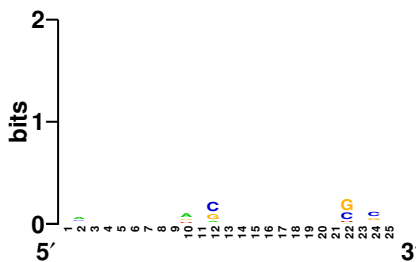

26-mers:

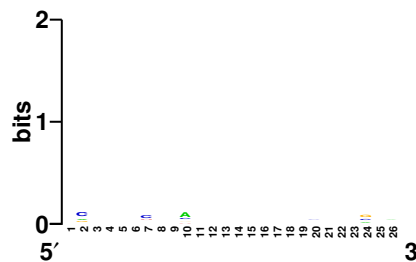

27-mers:

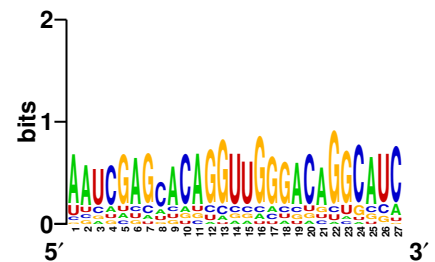

28-mers:

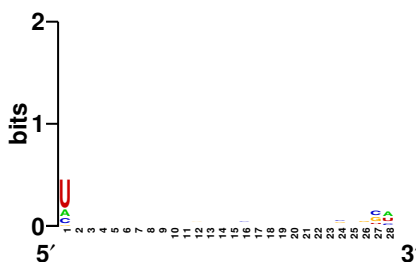

29-mers:

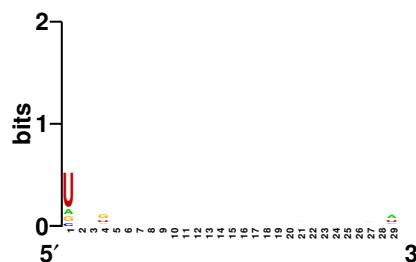

30-mers:

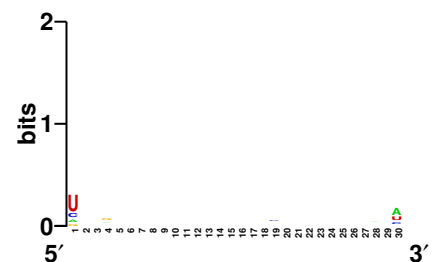

Antisense reads:

18-mers:

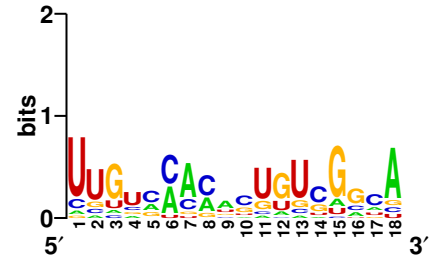

19-mers:

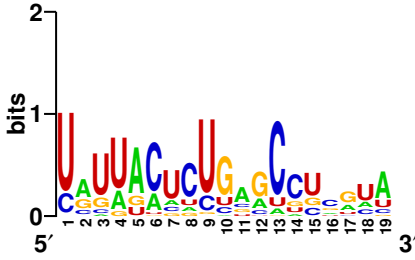

20-mers:

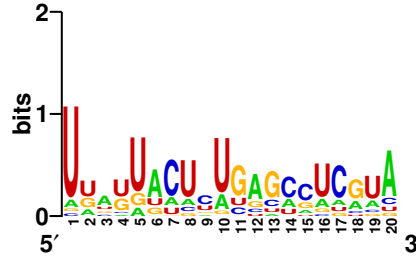

21-mers:

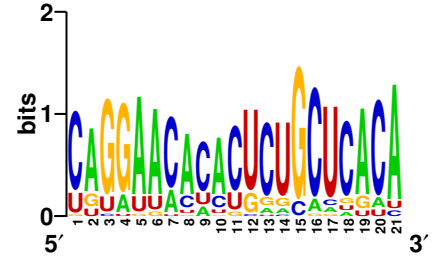

22-mers:

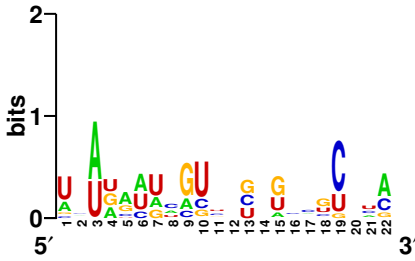

23-mers:

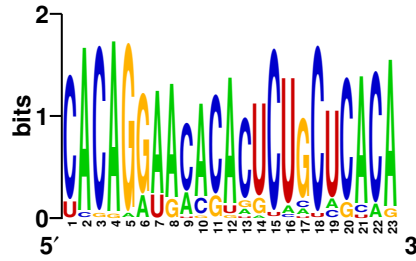

24-mers:

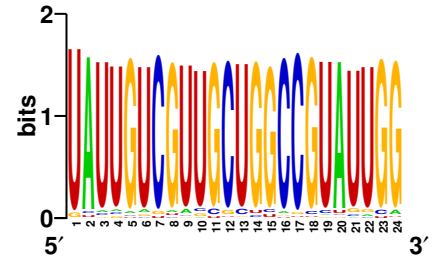

25-mers:

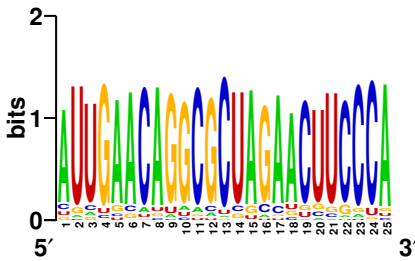

26-mers:

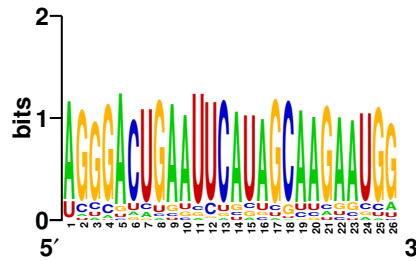

27-mers:

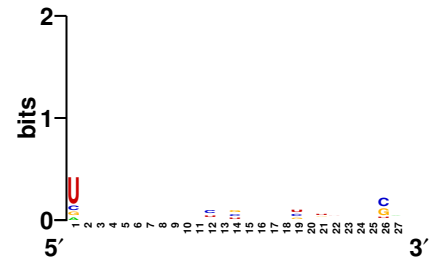

28-mers:

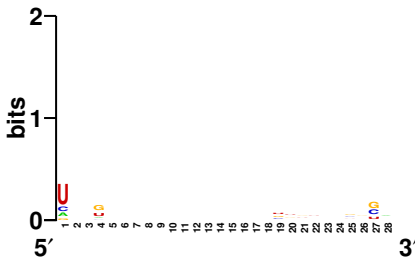

29-mers:

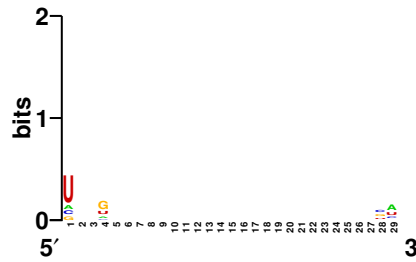

30-mers:

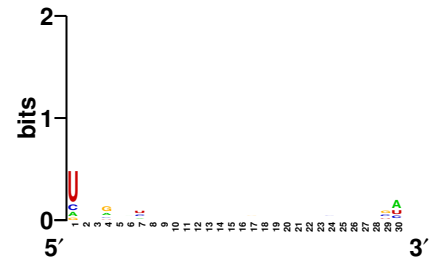

### 3.3 Libraries #3 (total 5' hydroxyl or polyphosphorylated small RNAs)

Embryo 8h, library 3:

Sense reads:

18-mers:

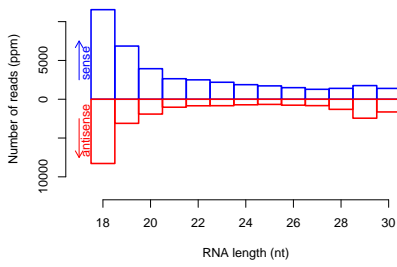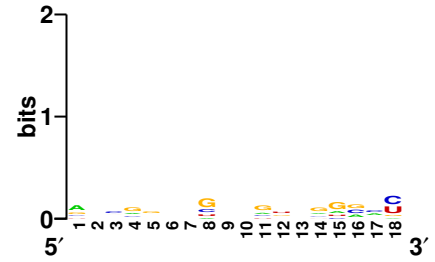

19-mers:

20-mers:

21-mers:

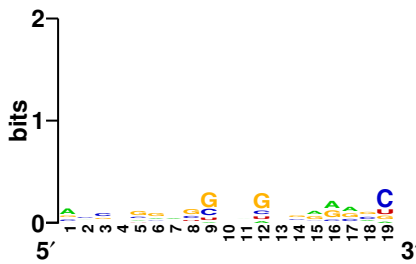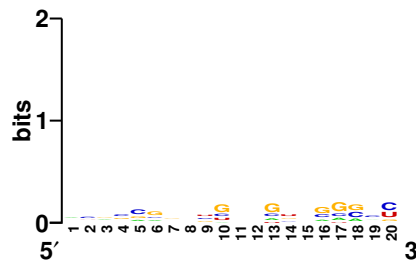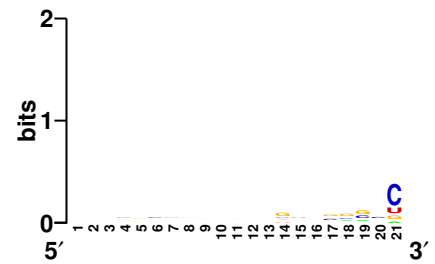

22-mers:

23-mers:

24-mers:

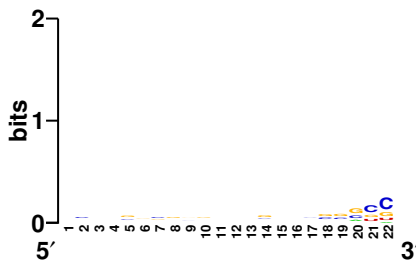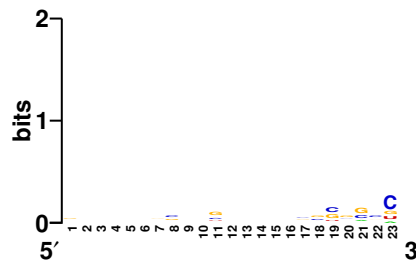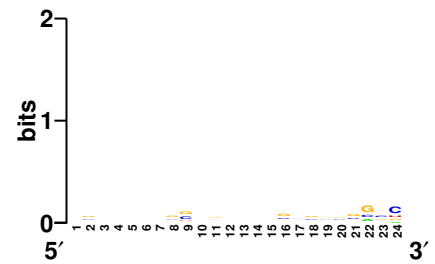

25-mers:

26-mers:

27-mers:

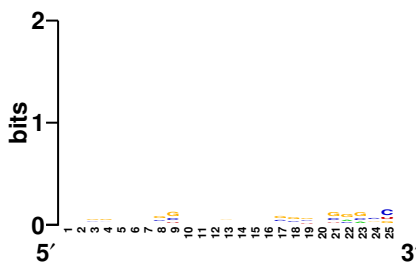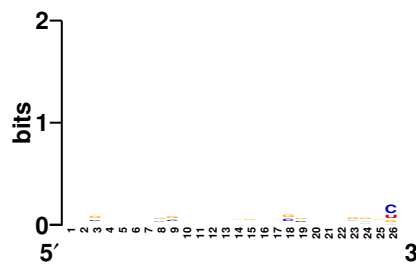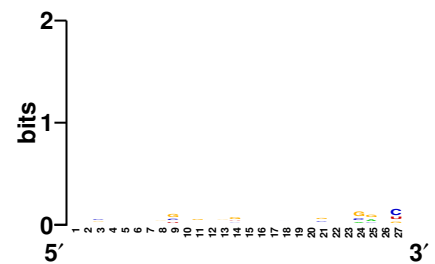

28-mers:

29-mers:

30-mers:

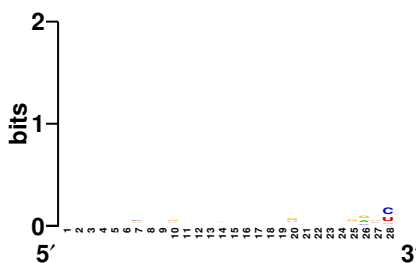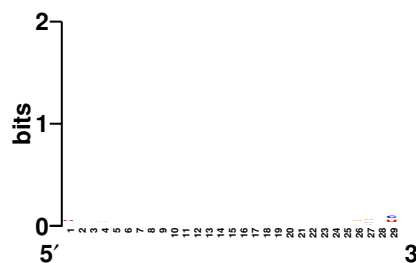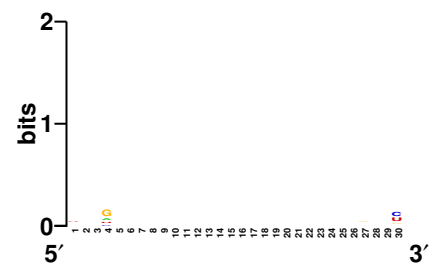



Embryo 15h, library 3:

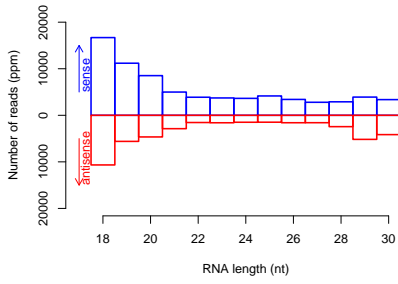

Sense reads:

18-mers:

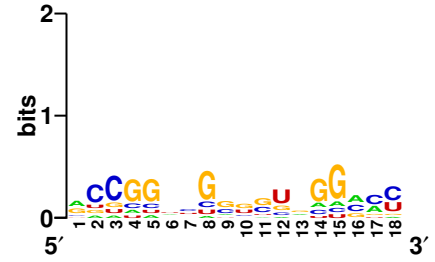

19-mers:

20-mers:

21-mers:

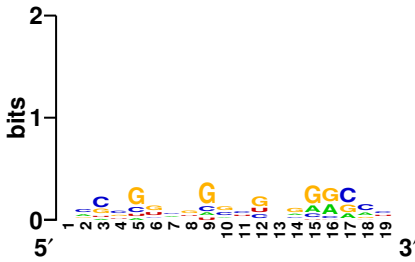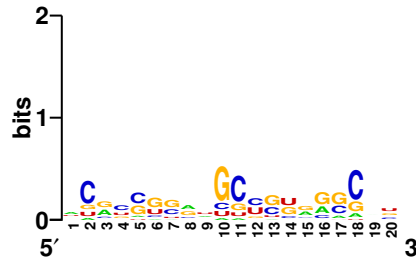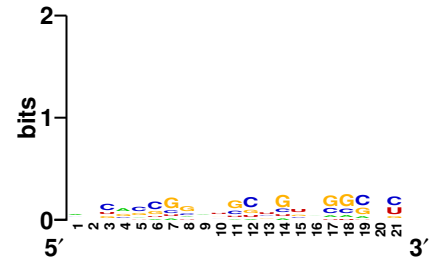

22-mers:

23-mers:

24-mers:

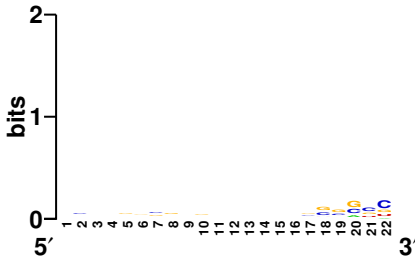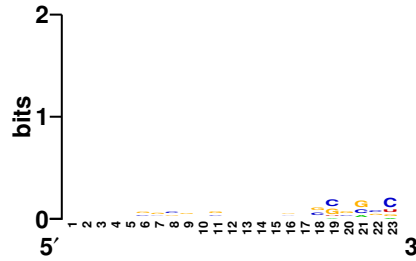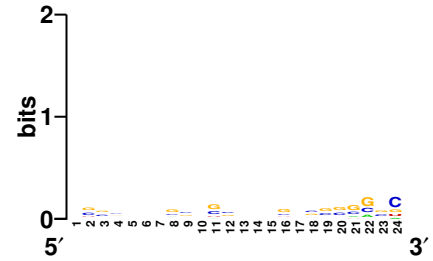

25-mers:

26-mers:

27-mers:

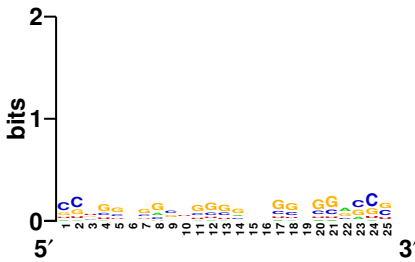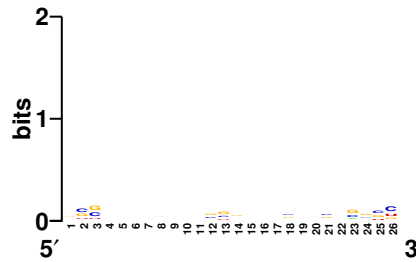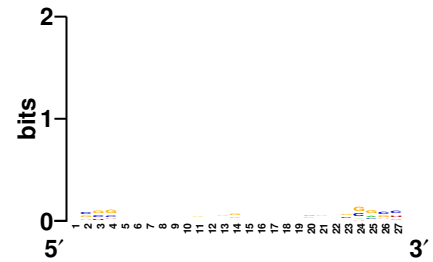

28-mers:

29-mers:

30-mers:

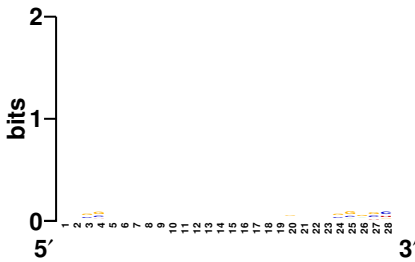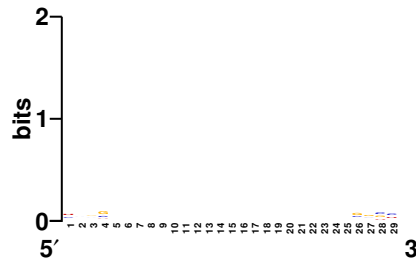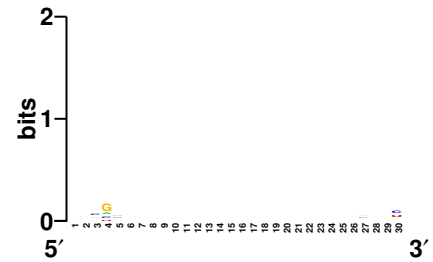

Antisense reads:

18-mers:

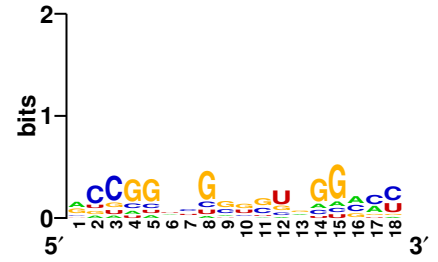

19-mers:

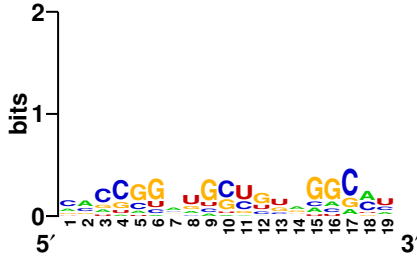

20-mers:

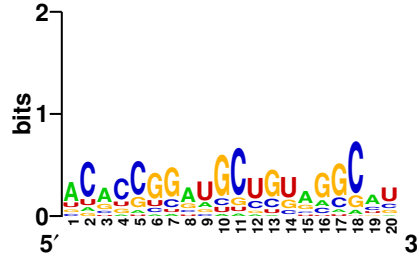

21-mers:

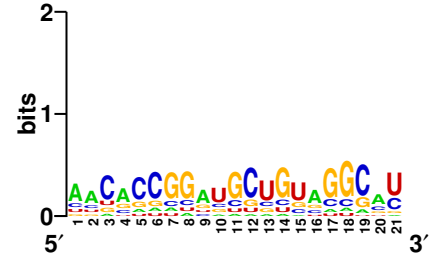

22-mers:

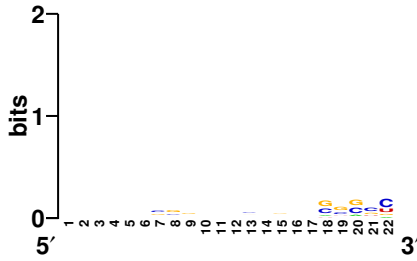

23-mers:

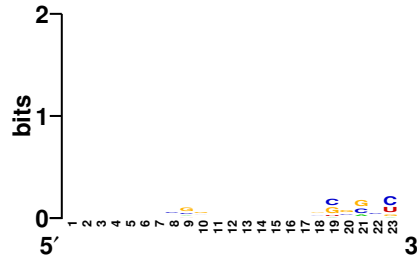

24-mers:

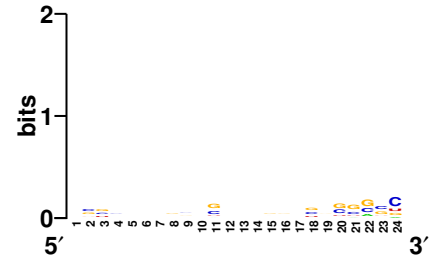

25-mers:

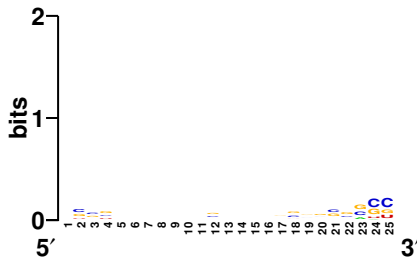

26-mers:

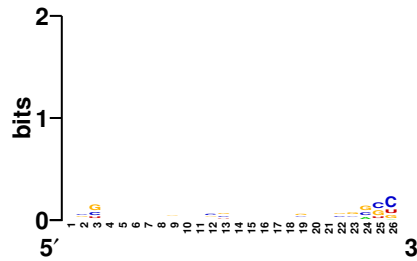

27-mers:

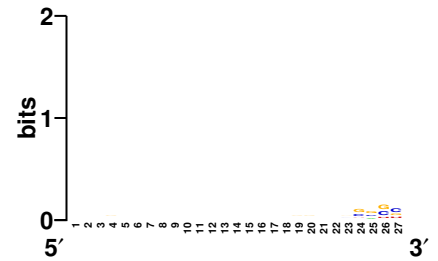

28-mers:

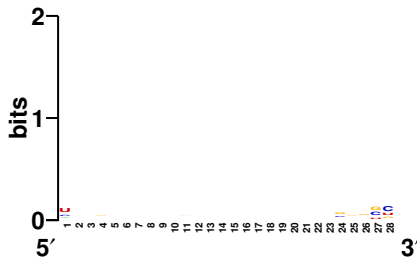

29-mers:

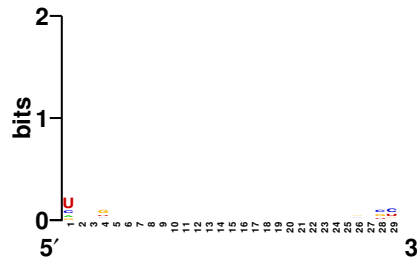

30-mers:

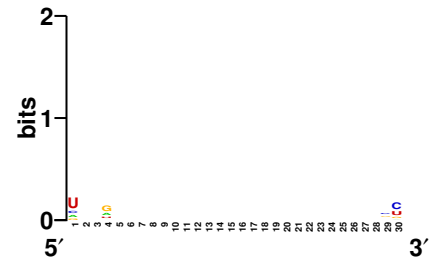

Embryo 36h, library 3:

Sense reads:

18-mers:

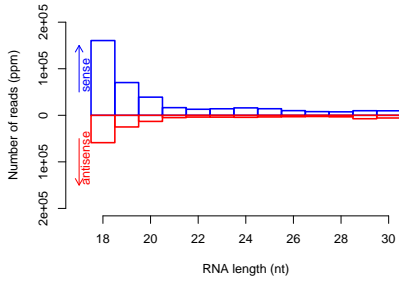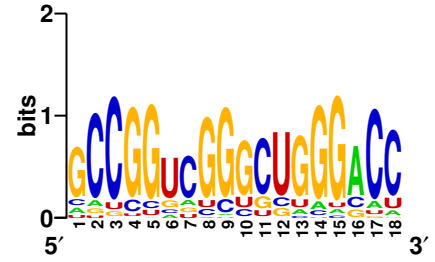

19-mers:

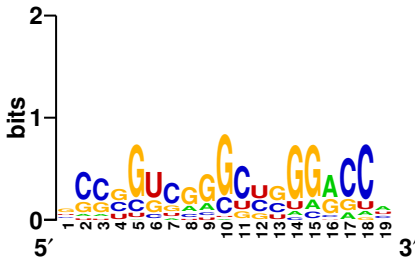

20-mers:

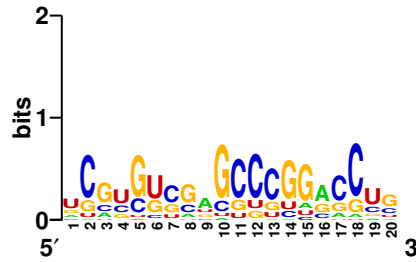

21-mers:

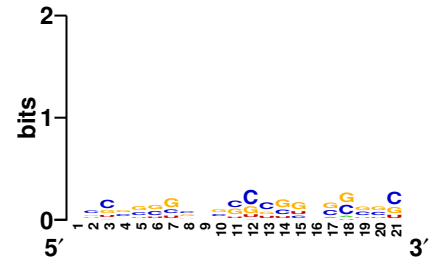

22-mers:

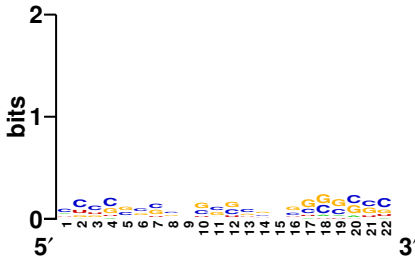

23-mers:

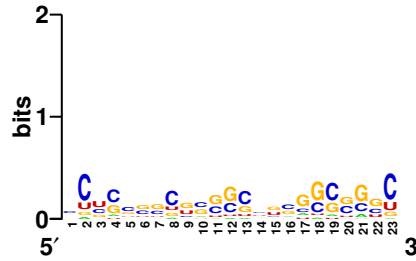

24-mers:

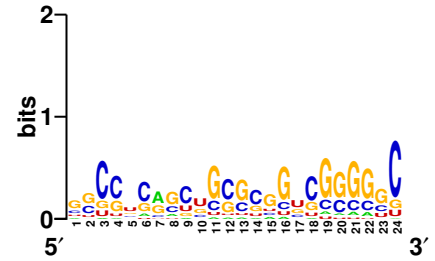

25-mers:

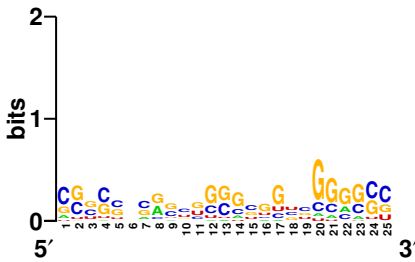

26-mers:

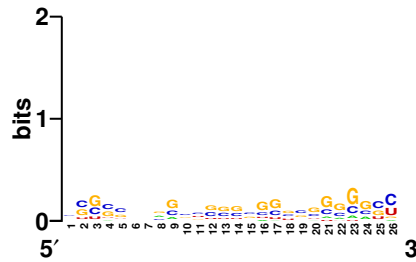

27-mers:

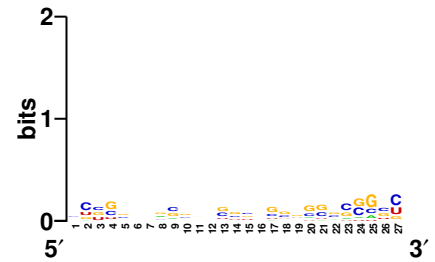

28-mers:

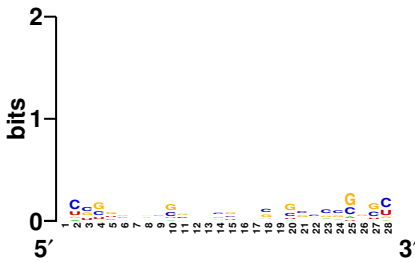

29-mers:

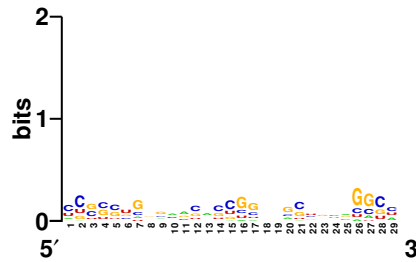

30-mers:

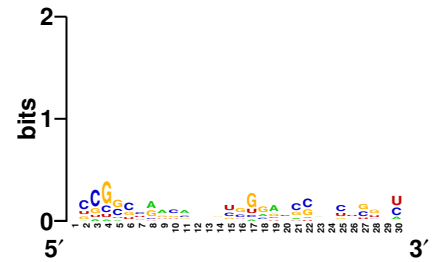

Antisense reads:

18-mers:

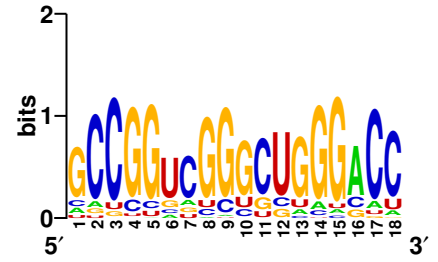

19-mers:

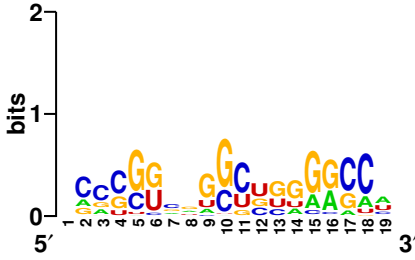

20-mers:

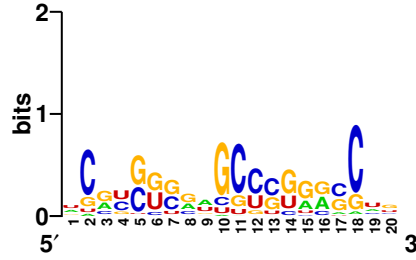

21-mers:

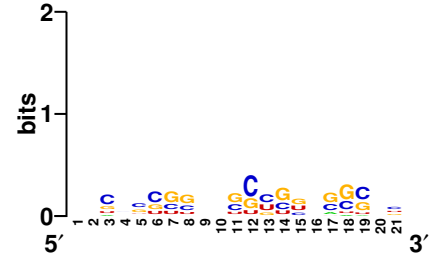

22-mers:

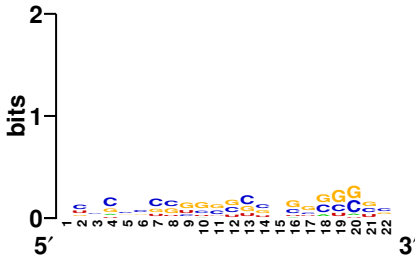

23-mers:

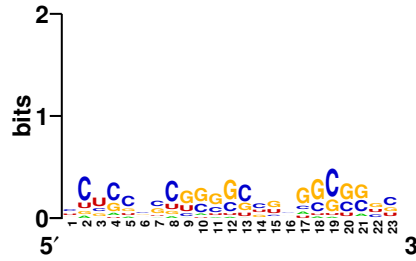

24-mers:

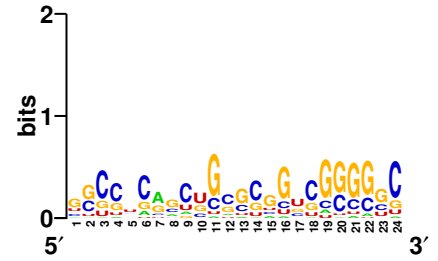

25-mers:

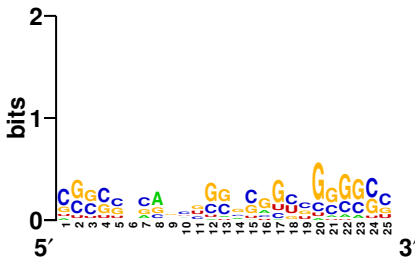

26-mers:

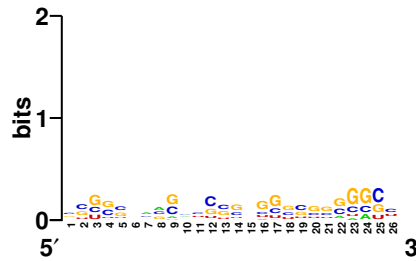

27-mers:

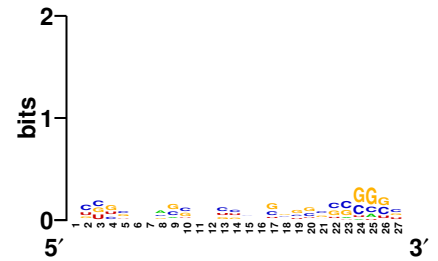

28-mers:

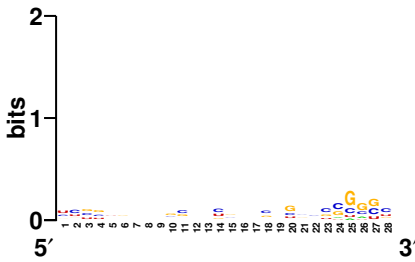

29-mers:

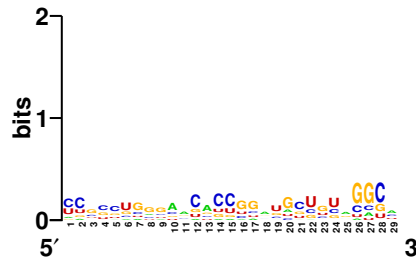

30-mers:

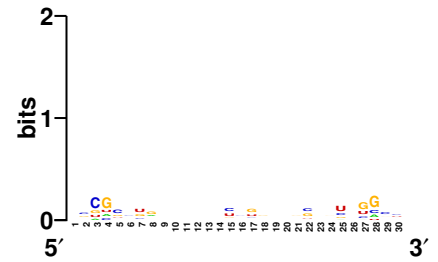



Embryo 60h, library 3:

Sense reads:

18-mers:

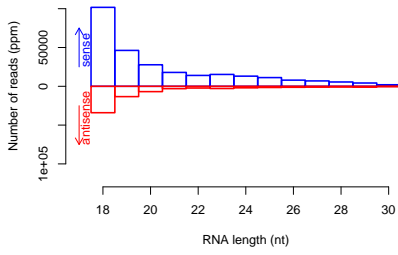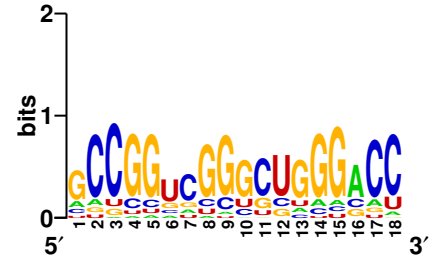

19-mers:

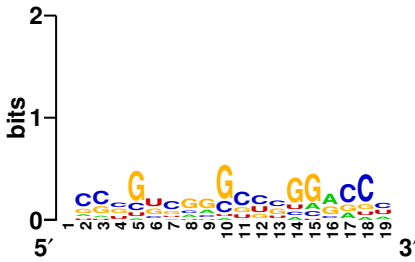

20-mers:

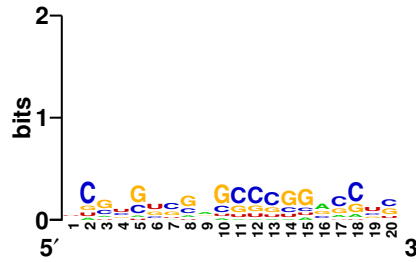

21-mers:

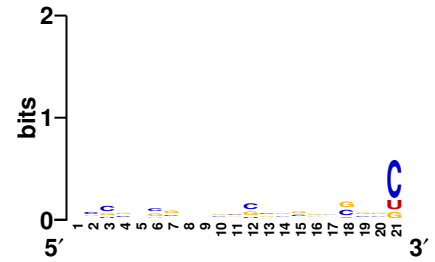

22-mers:

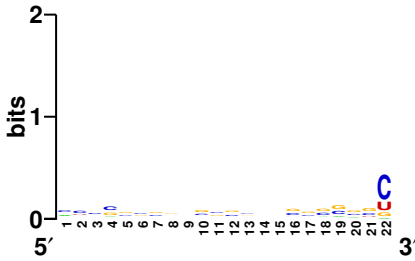

23-mers:

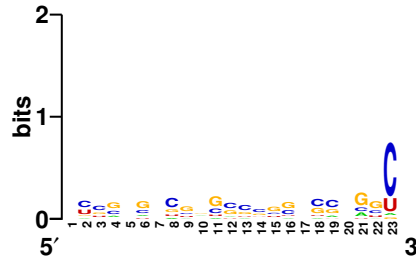

24-mers:

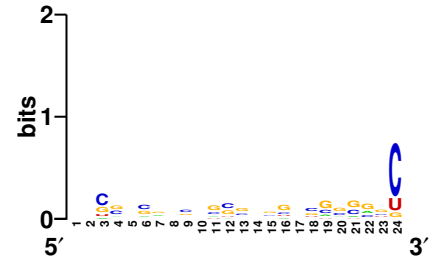

25-mers:

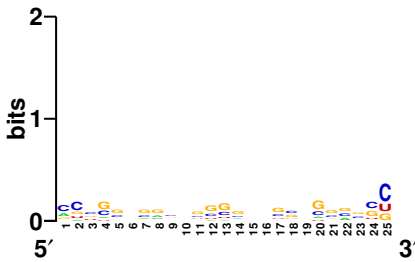

26-mers:

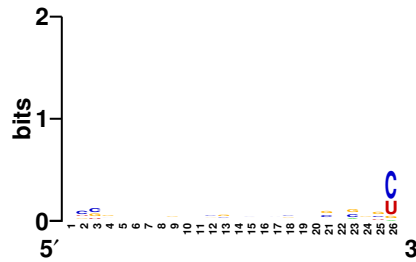

27-mers:

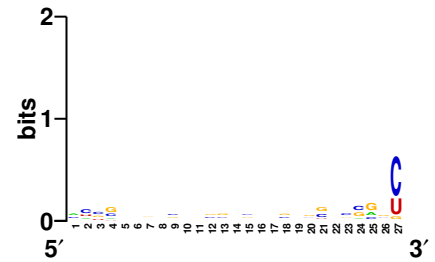

28-mers:

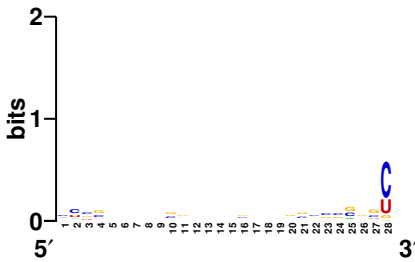

29-mers:

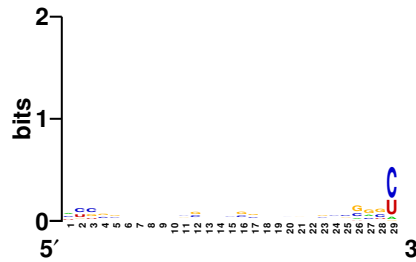

30-mers:

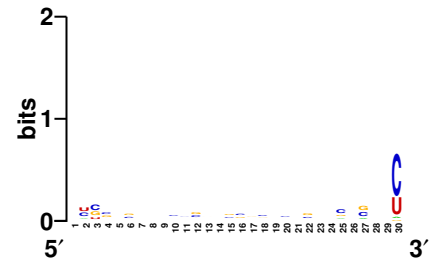



Adult female, library 3:

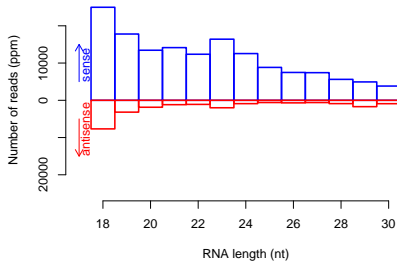

Sense reads:

18-mers:

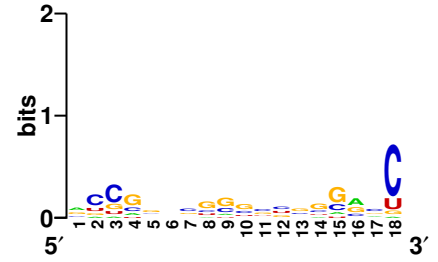

19-mers:

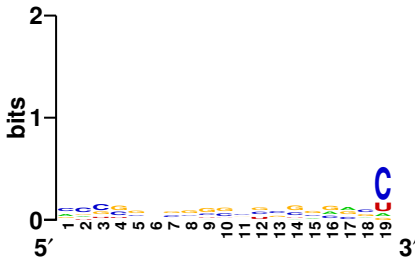

20-mers:

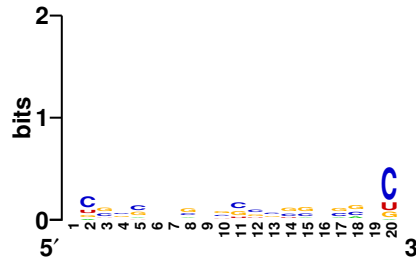

21-mers:

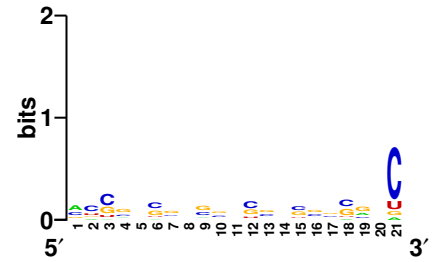

22-mers:

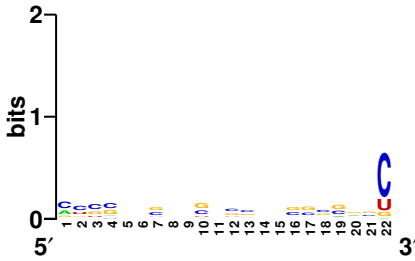

23-mers:

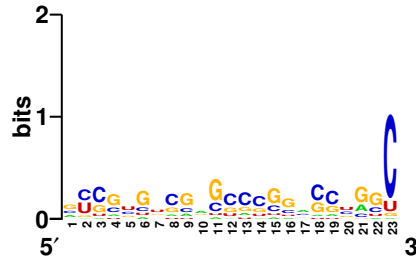

24-mers:

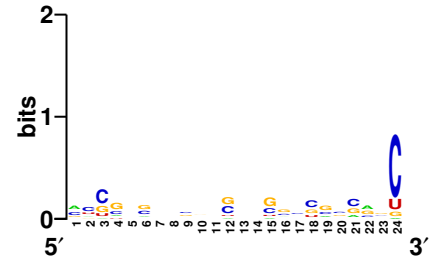

25-mers:

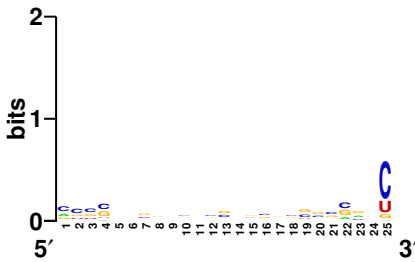

26-mers:

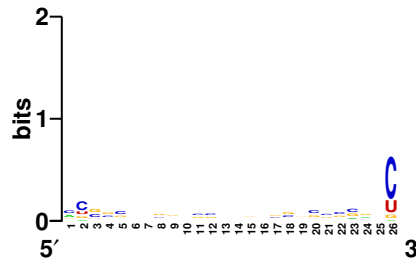

27-mers:

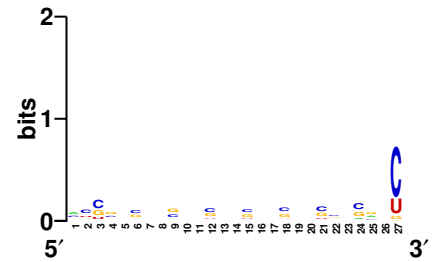

28-mers:

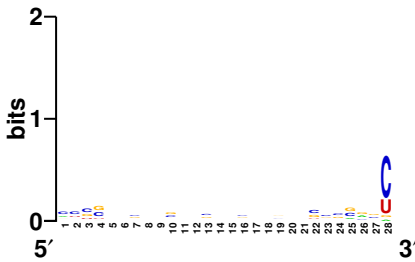

29-mers:

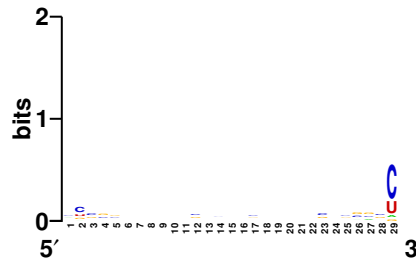

30-mers:

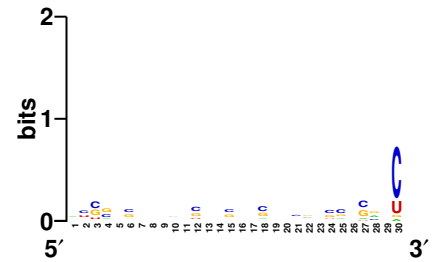



Adult male, library 3:

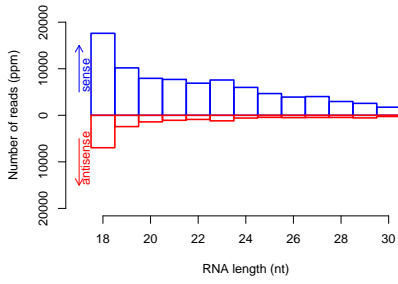

Sense reads:

18-mers:

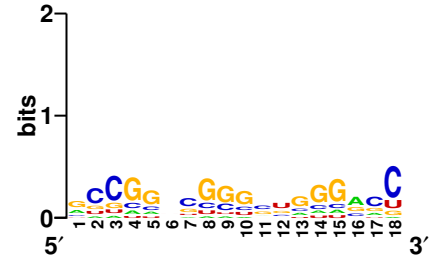

19-mers:

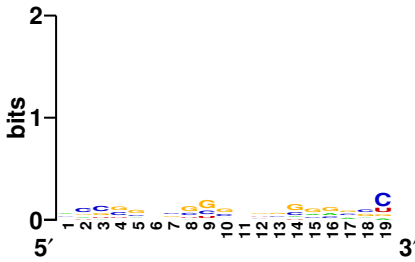

20-mers:

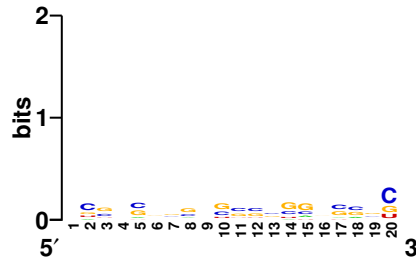

21-mers:

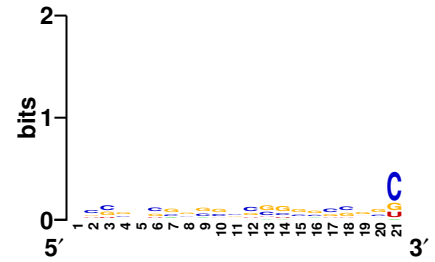

22-mers:

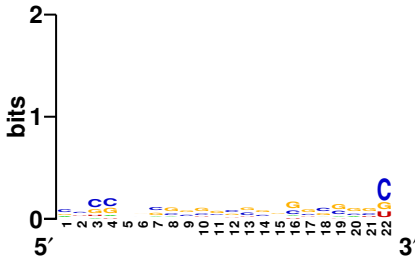

23-mers:

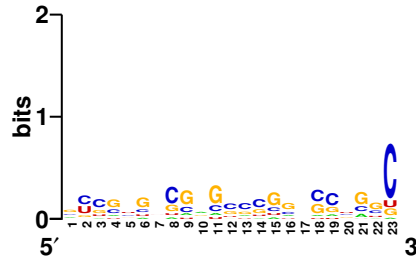

24-mers:

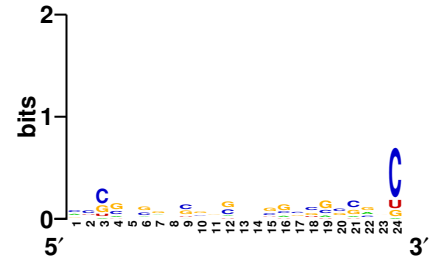

25-mers:

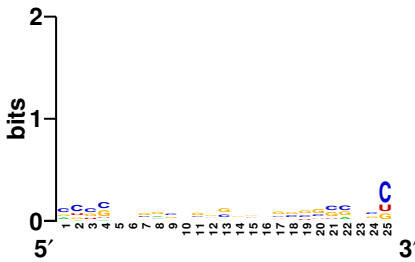

26-mers:

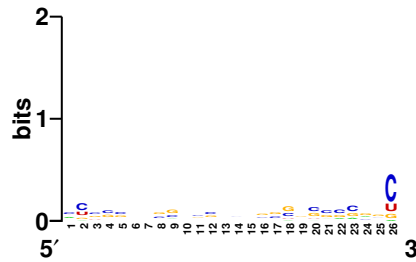

27-mers:

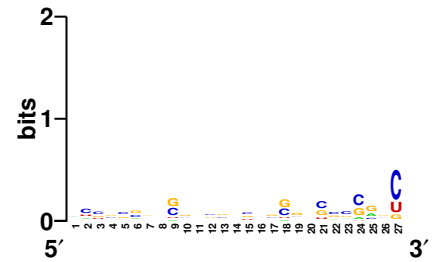

28-mers:

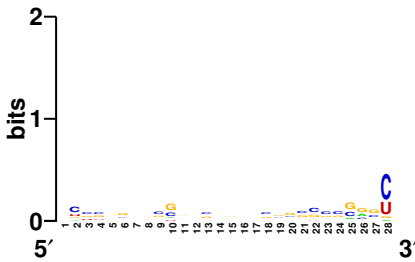

29-mers:

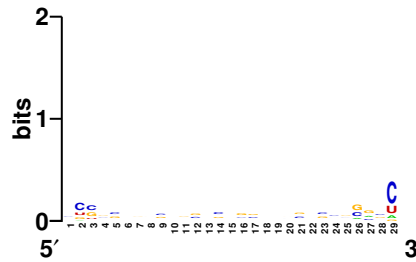

30-mers:

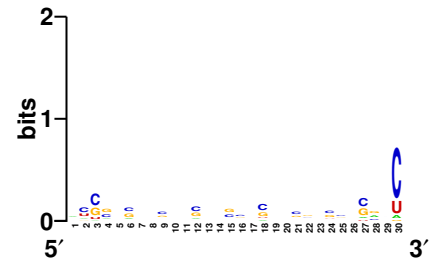

Antisense reads:

18-mers:

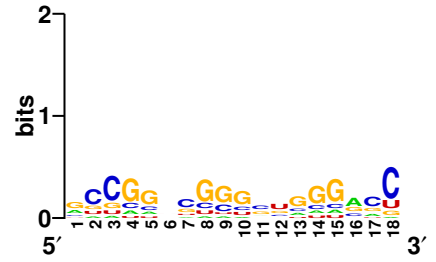

19-mers:

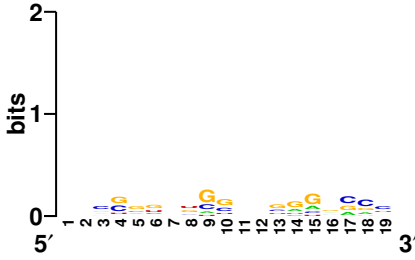

20-mers:

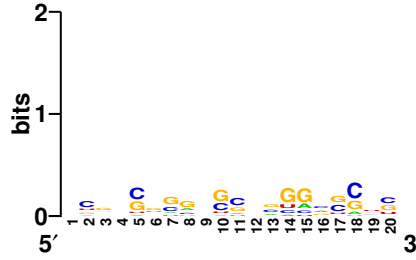

21-mers:

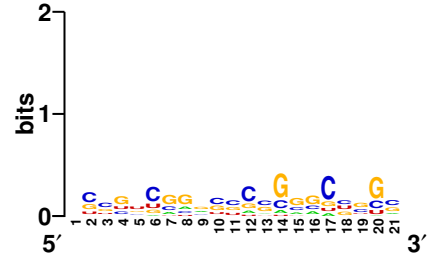

22-mers:

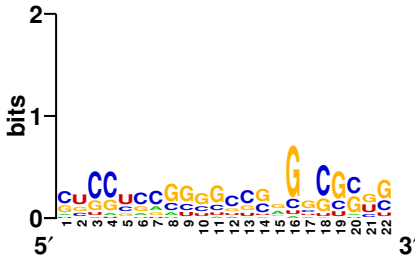

23-mers:

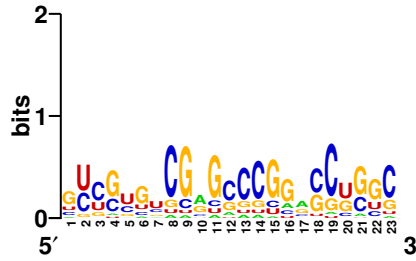

24-mers:

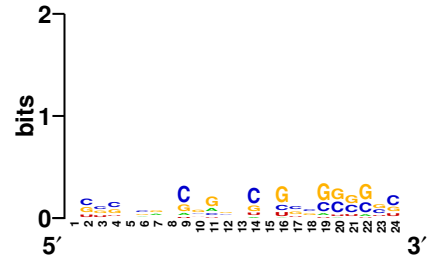

25-mers:

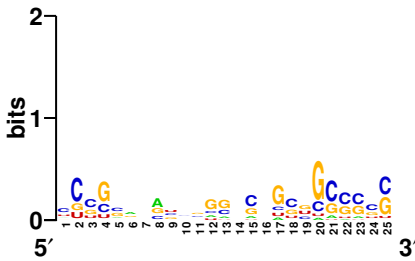

26-mers:

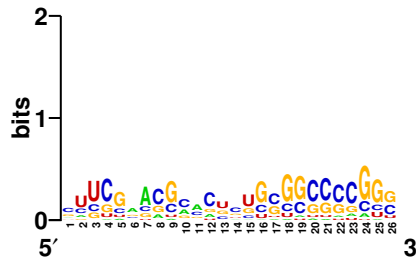

27-mers:

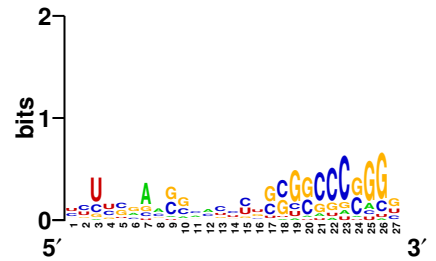

28-mers:

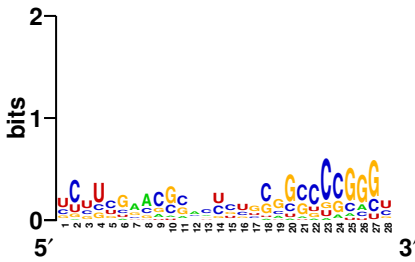

29-mers:

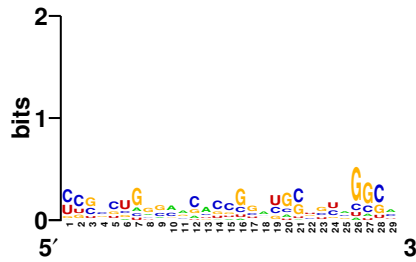

30-mers:

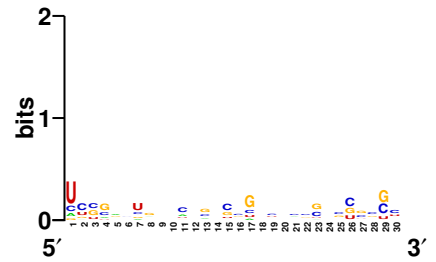

### 3.4 Libraries #4 (3' modified, 5' hydroxyl or polyphosphorylated small RNAs)

Embryo 8h, library 4:

Sense reads:

18-mers:

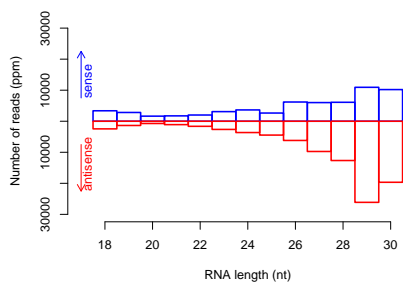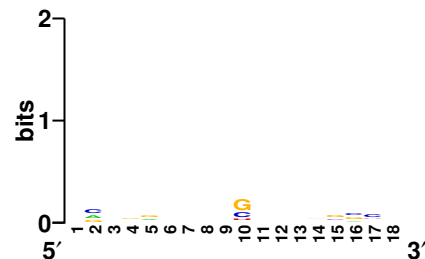

19-mers:

20-mers:

21-mers:

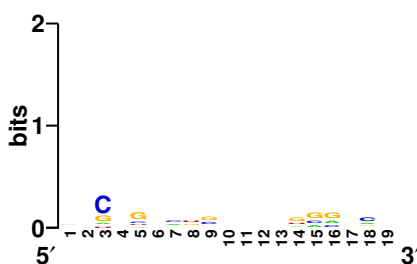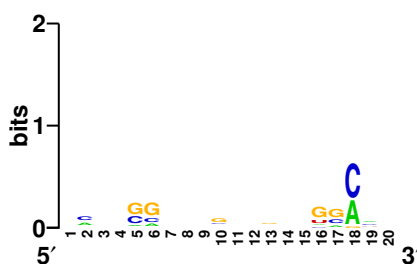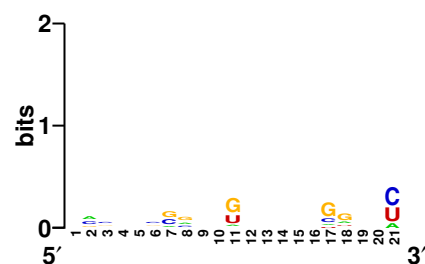

22-mers:

23-mers:

24-mers:

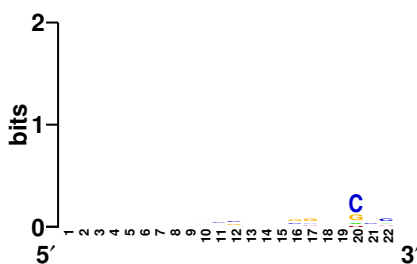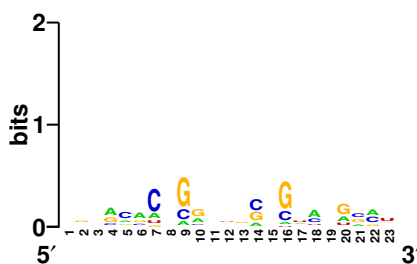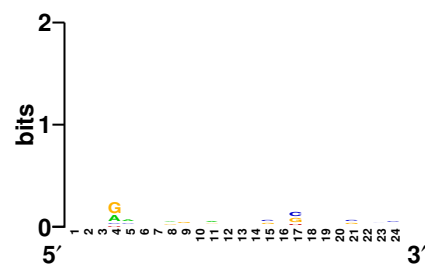

25-mers:

26-mers:

27-mers:

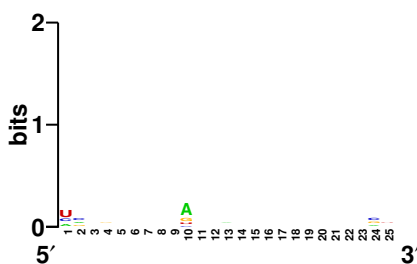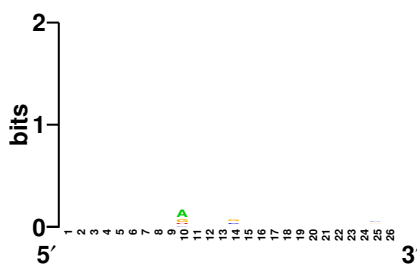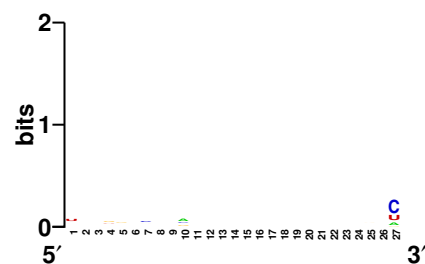

28-mers:

29-mers:

30-mers:

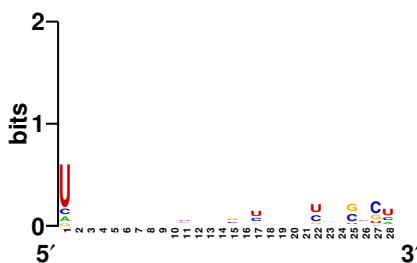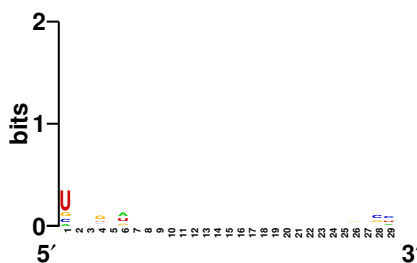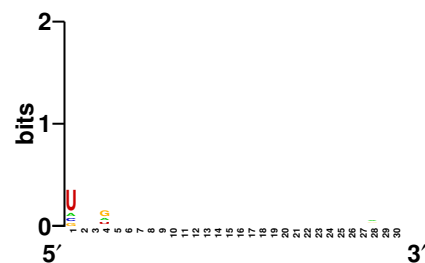





Embryo 15h, library 4:

Sense reads:

18-mers:

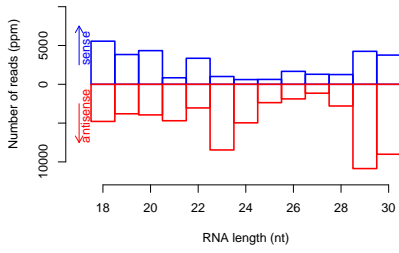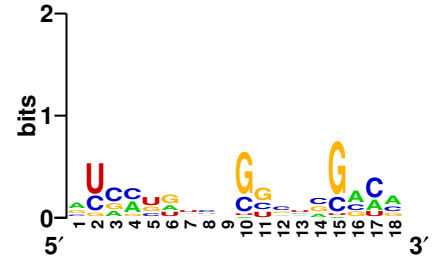

19-mers:

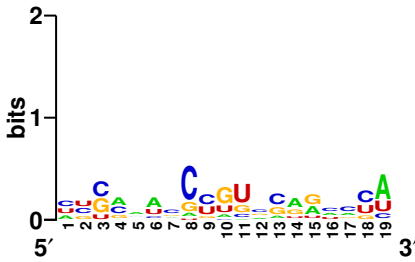

20-mers:

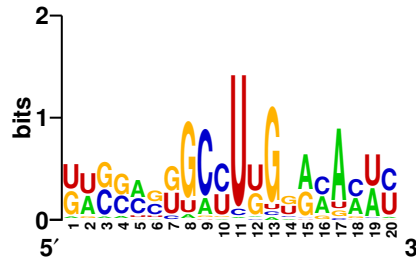

21-mers:

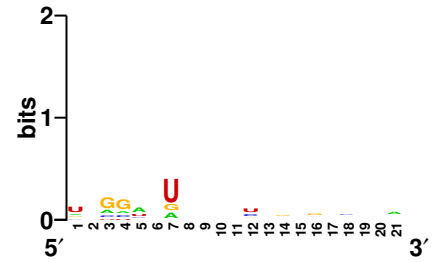

22-mers:

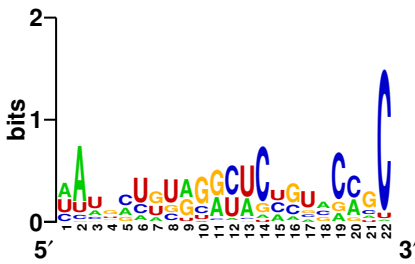

23-mers:

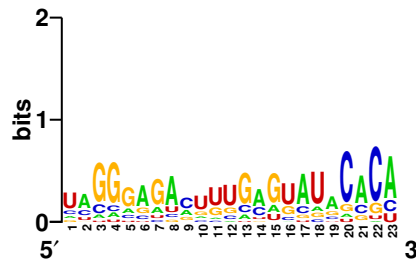

24-mers:

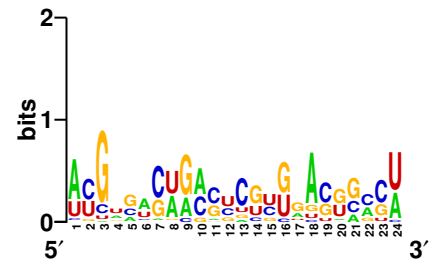

25-mers:

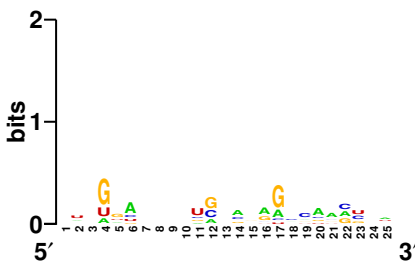

26-mers:

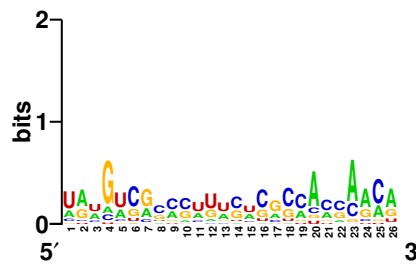

27-mers:

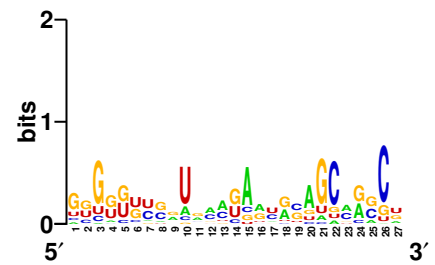

28-mers:

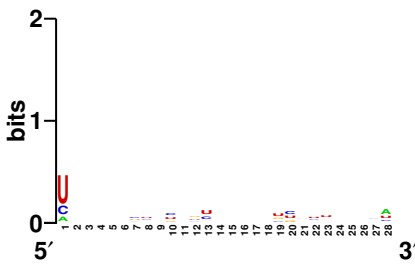

29-mers:

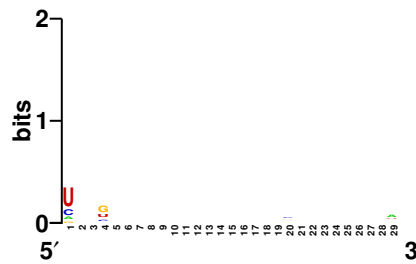

30-mers:

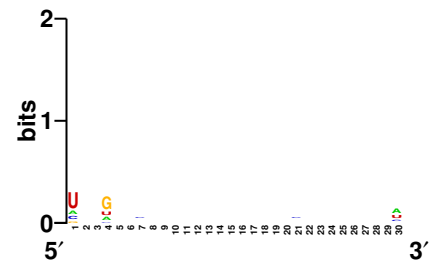

Antisense reads:

18-mers:

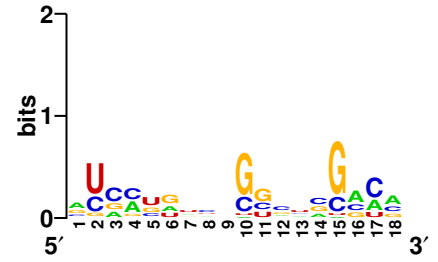

19-mers:

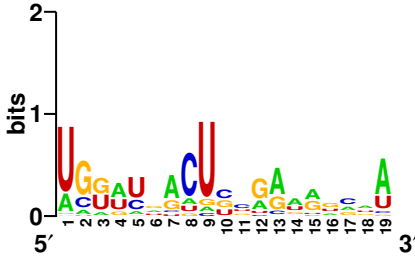

20-mers:

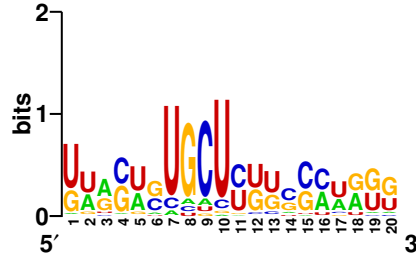

21-mers:

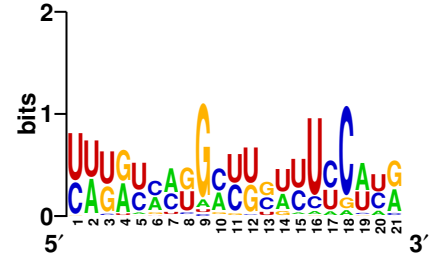

22-mers:

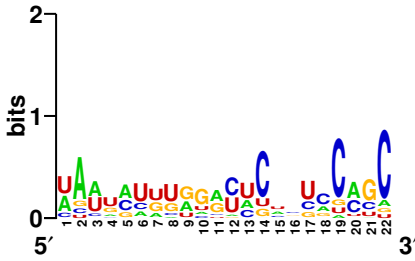

23-mers:

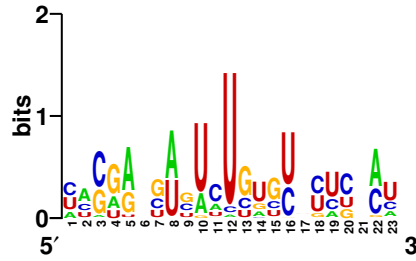

24-mers:

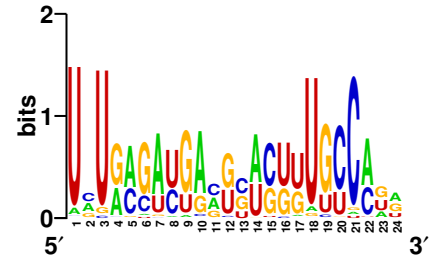

25-mers:

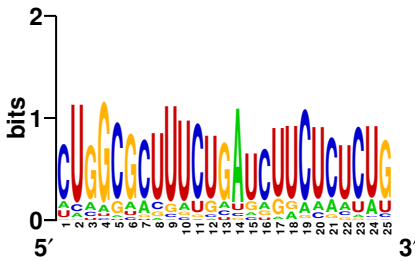

26-mers:

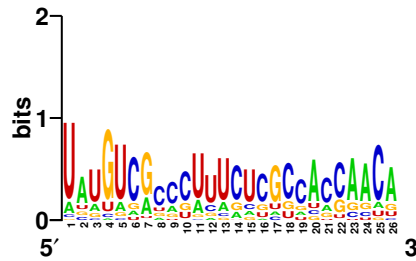

27-mers:

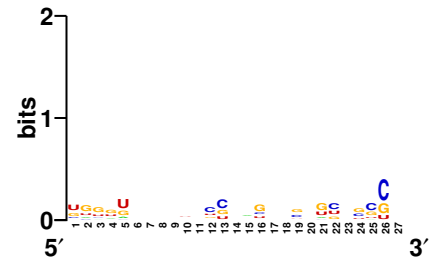

28-mers:

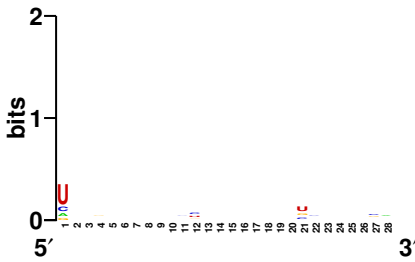

29-mers:

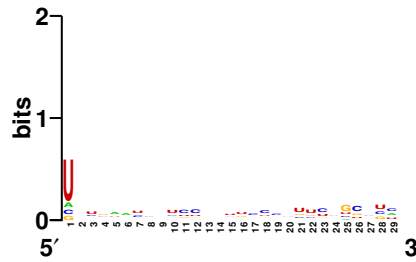

30-mers:

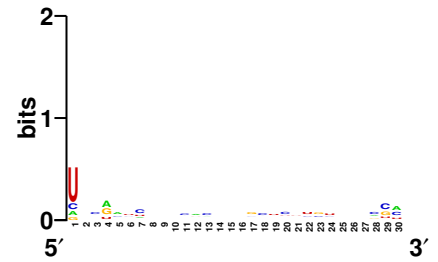

Embryo 36h, library 4:

Sense reads:

18-mers:

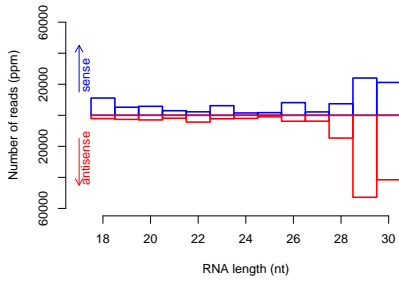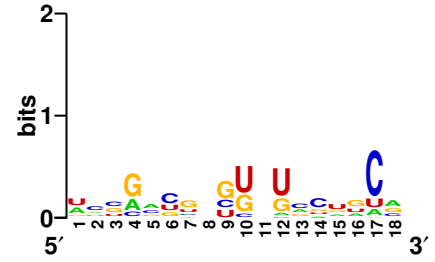

19-mers:

20-mers:

21-mers:

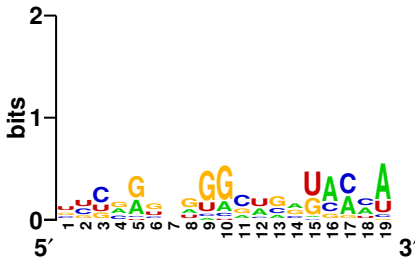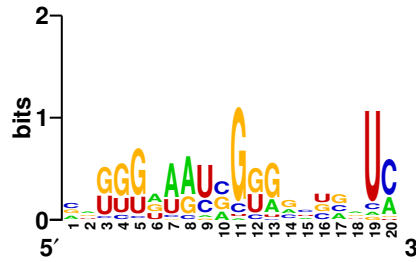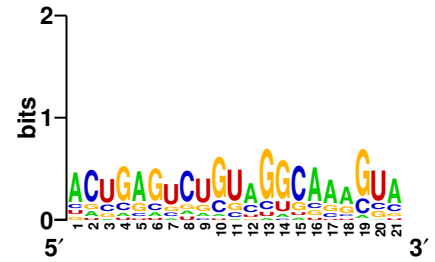

22-mers:

23-mers:

24-mers:

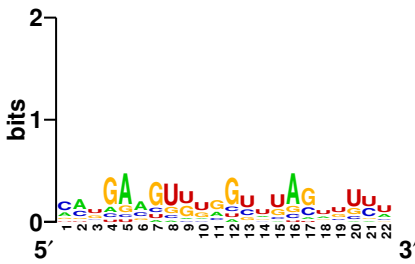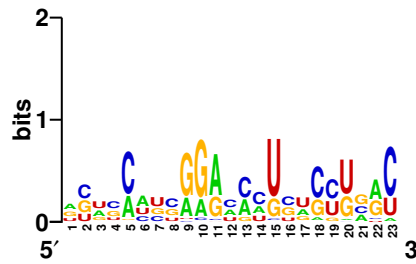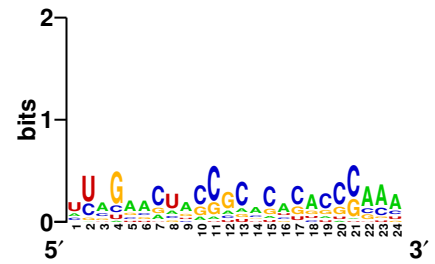

25-mers:

26-mers:

27-mers:

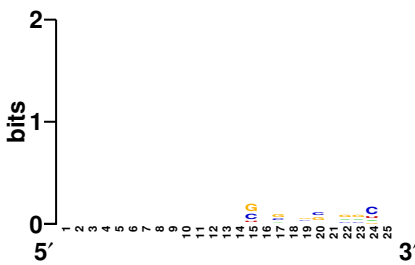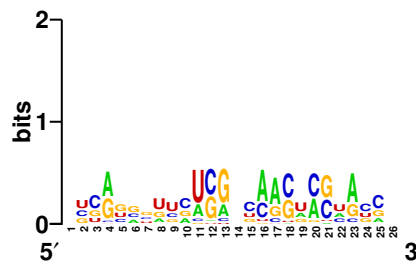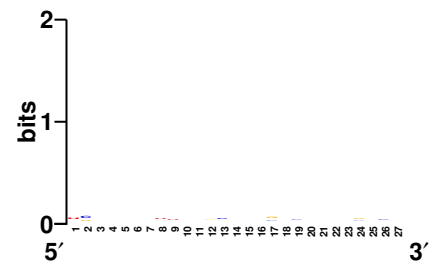

28-mers:

29-mers:

30-mers:

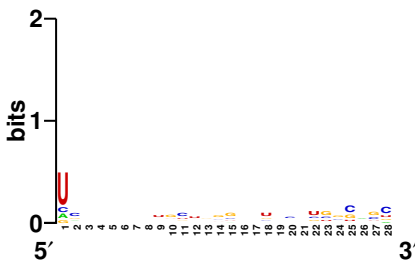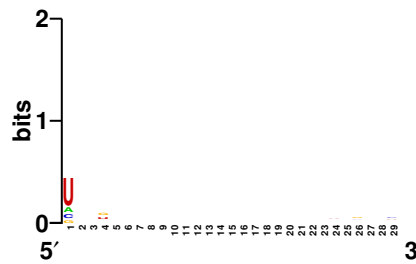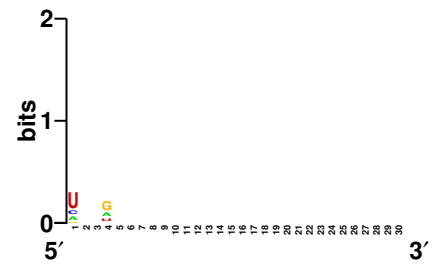



Embryo 60h, library 4:

Sense reads:

18-mers:

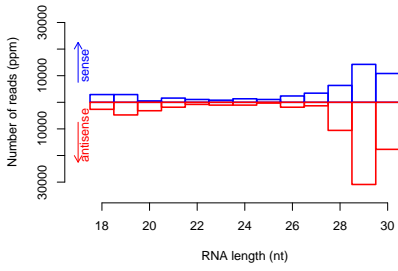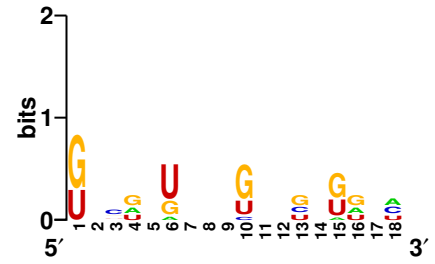

19-mers:

20-mers:

21-mers:

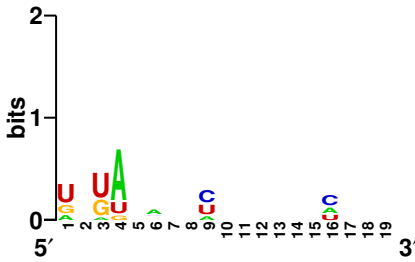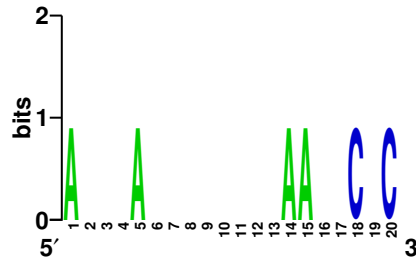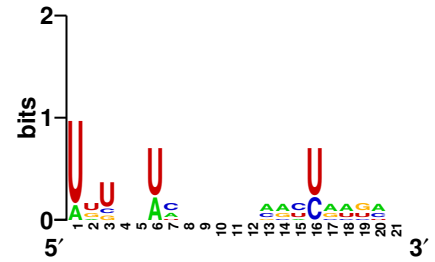

22-mers:

23-mers:

24-mers:

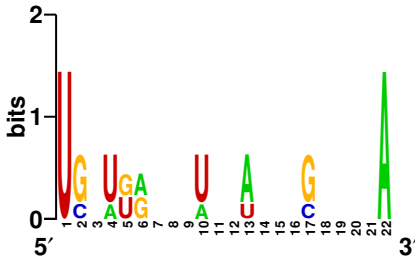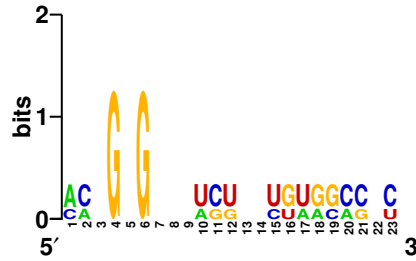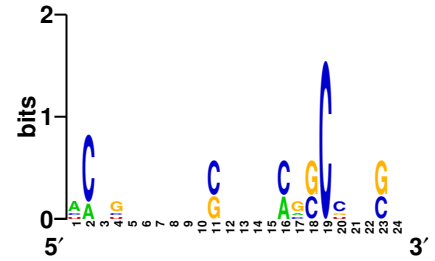

25-mers:

26-mers:

27-mers:

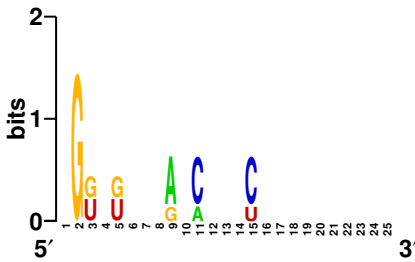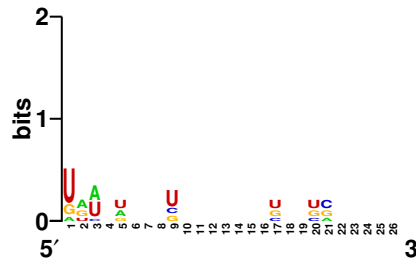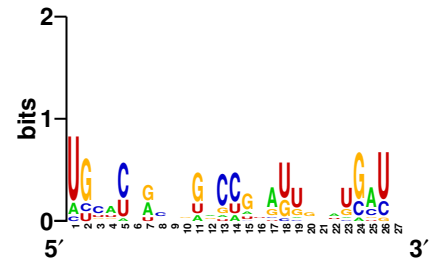

28-mers:

29-mers:

30-mers:

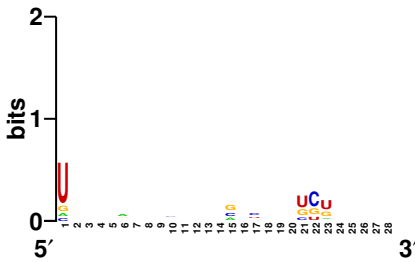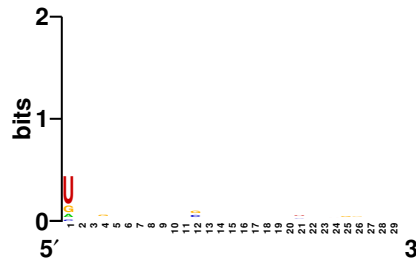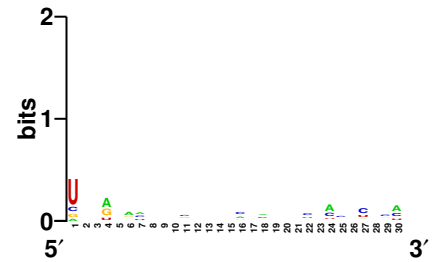

Antisense reads:

18-mers:

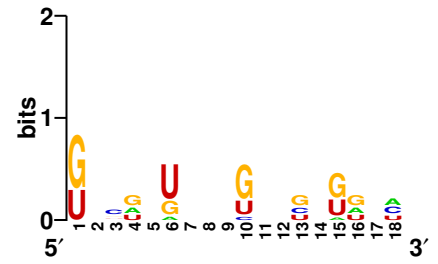

19-mers:

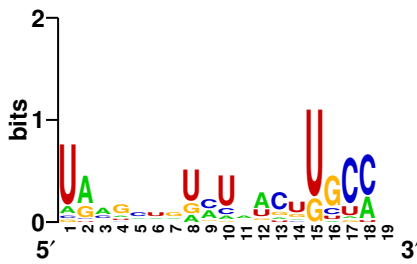

20-mers:

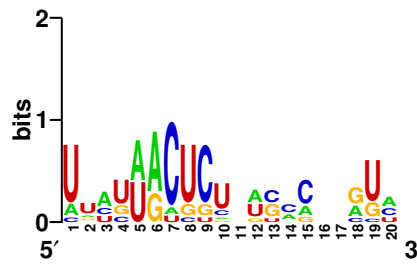

21-mers:

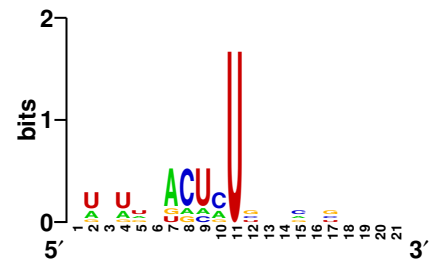

22-mers:

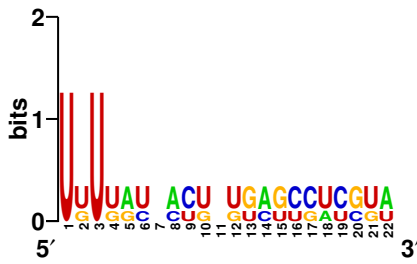

23-mers:

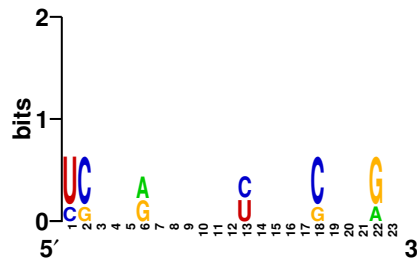

24-mers:

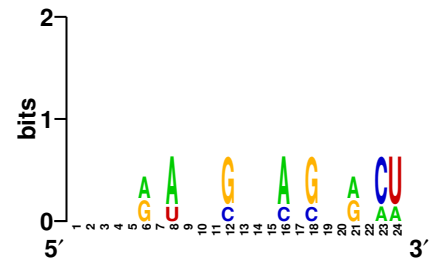

25-mers:

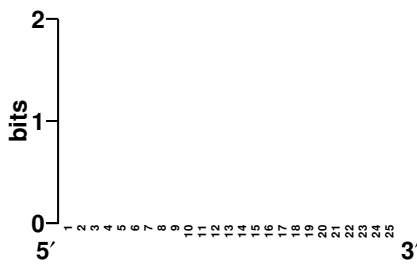

26-mers:

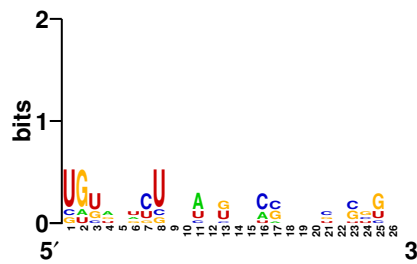

27-mers:

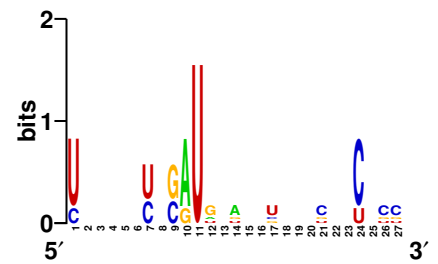

28-mers:

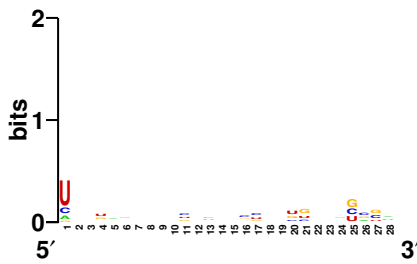

29-mers:

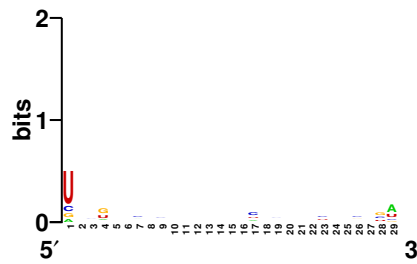

30-mers:

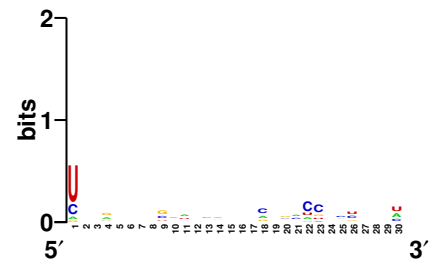

Adult female, library 4:

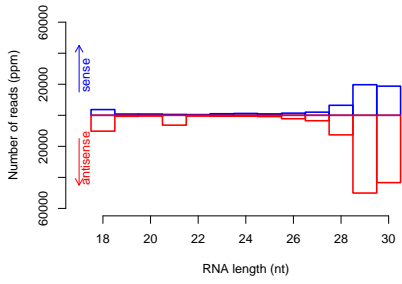

Sense reads:

18-mers:

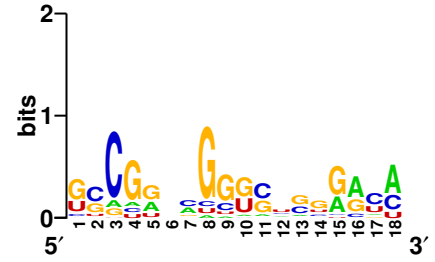

19-mers:

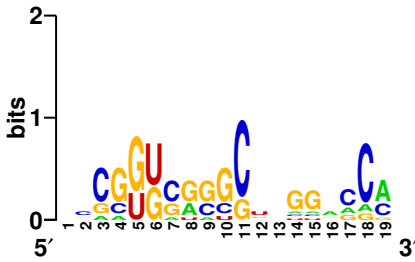

20-mers:

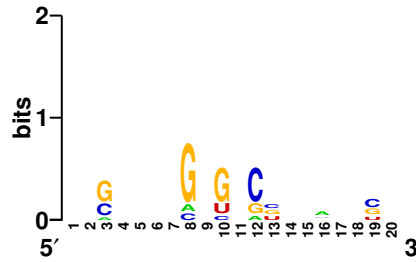

21-mers:

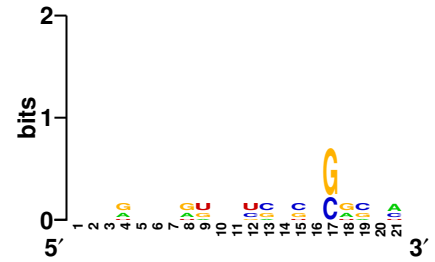

22-mers:

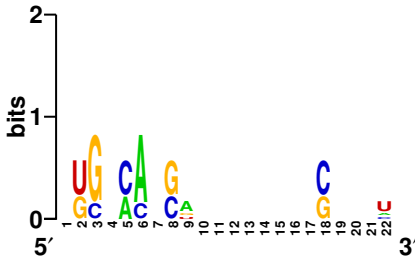

23-mers:

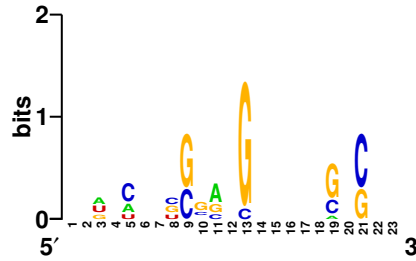

24-mers:

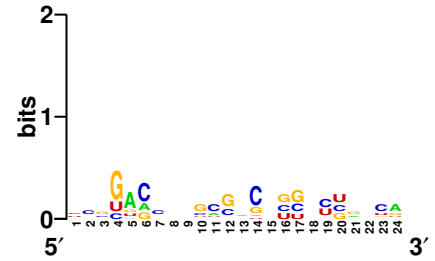

25-mers:

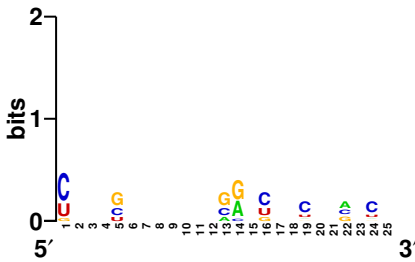

26-mers:

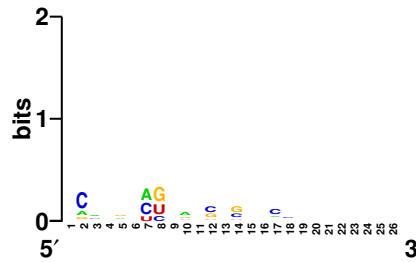

27-mers:

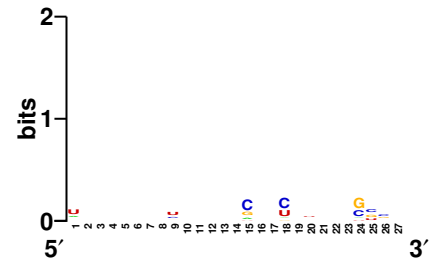

28-mers:

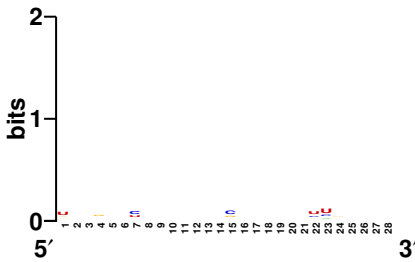

29-mers:

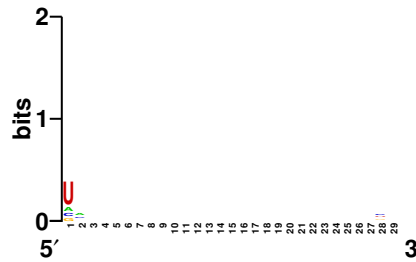

30-mers:

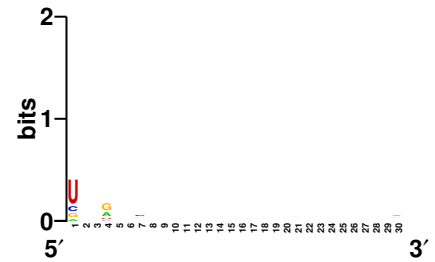







Antisense reads:

18-mers:

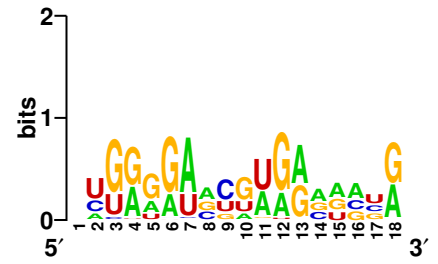

19-mers:

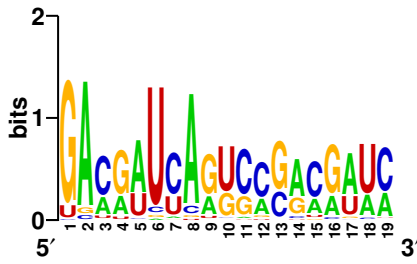

20-mers:

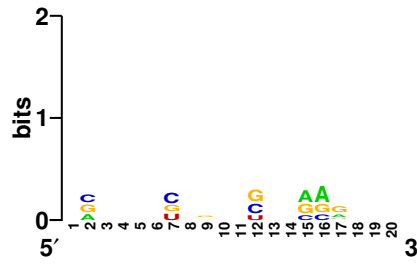

21-mers:

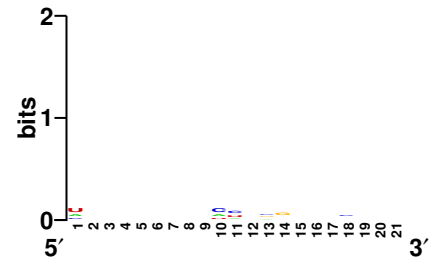

22-mers:

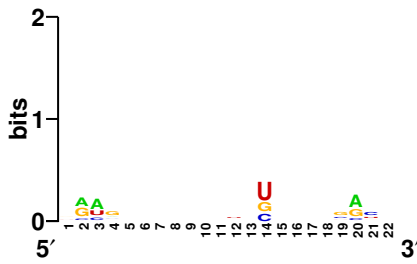

23-mers:

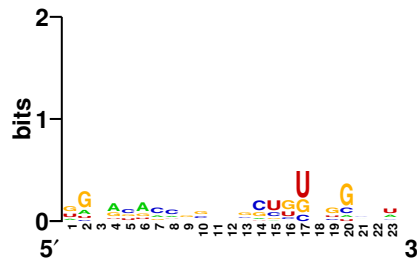

24-mers:

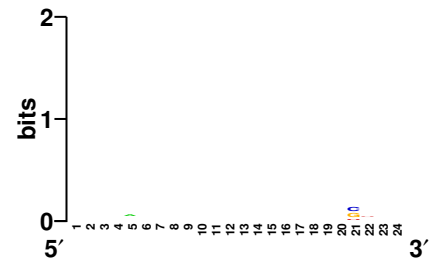

25-mers:

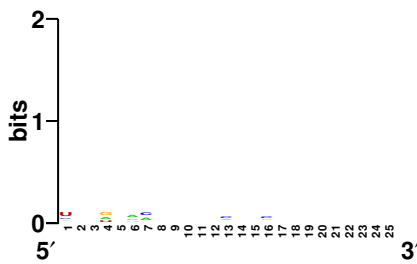

26-mers:

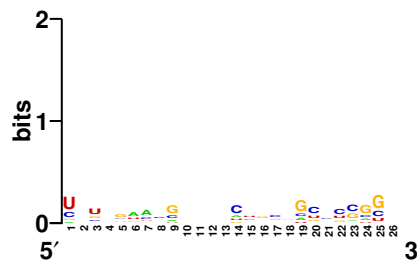

27-mers:

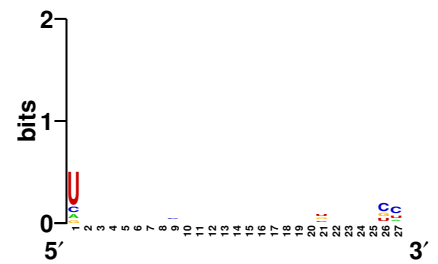

28-mers:

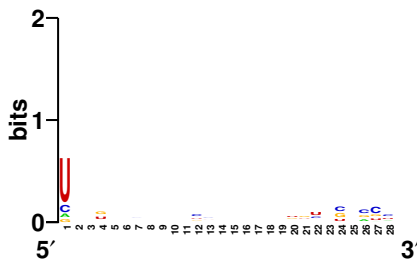

29-mers:

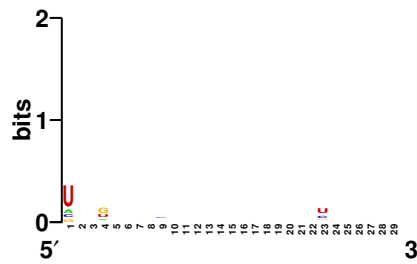

30-mers:

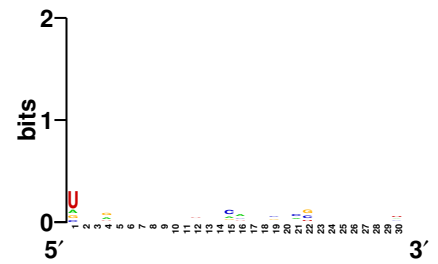

## 4 Reads matching RNAs with long ORF's

### 4.1 Libraries #1 (total 5' monophosphorylated small RNAs)

Embryo 8h, library 1:

Sense reads:

18-mers:

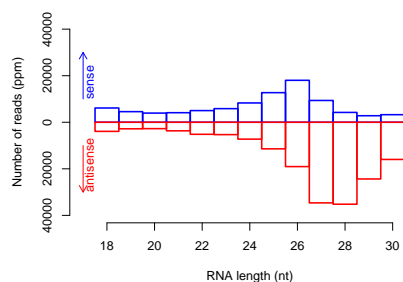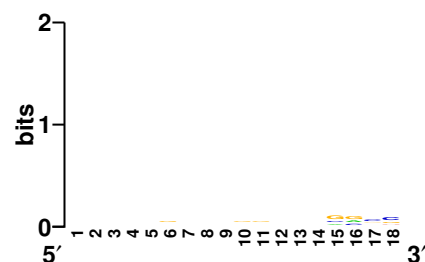

19-mers:

20-mers:

21-mers:

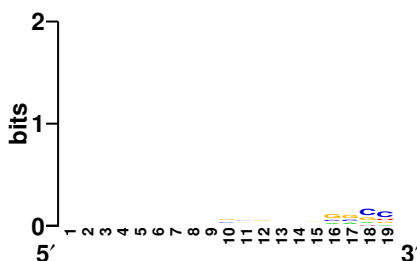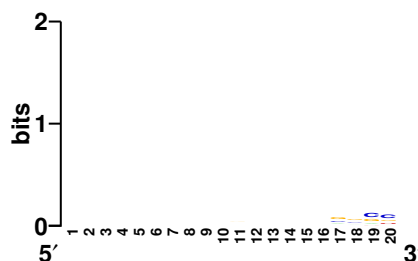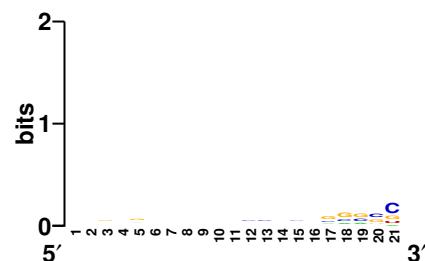

22-mers:

23-mers:

24-mers:

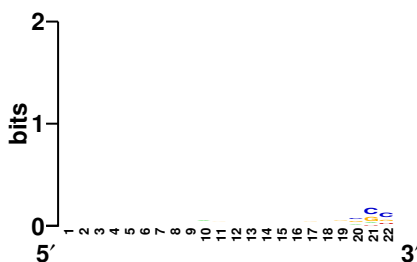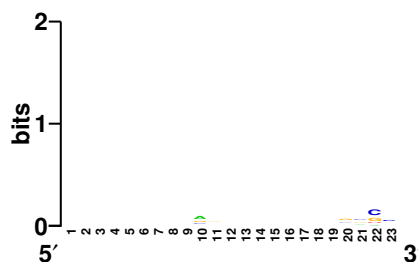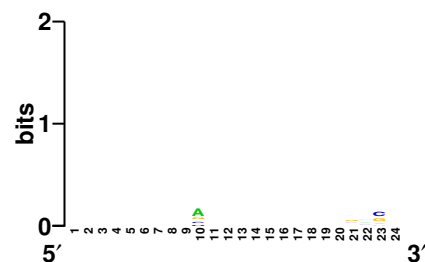

25-mers:

26-mers:

27-mers:

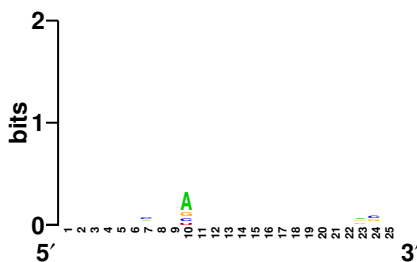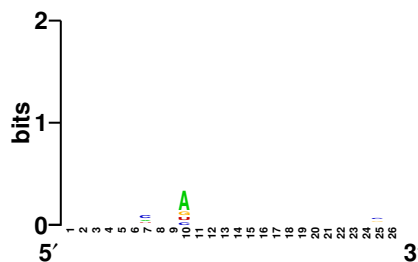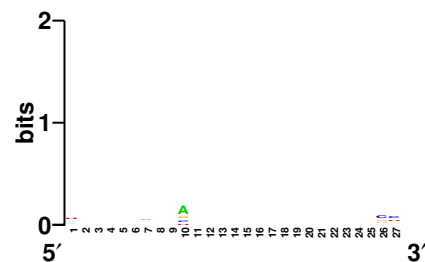

28-mers:

29-mers:

30-mers:

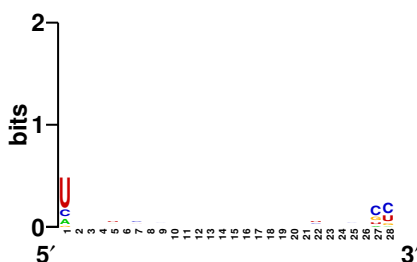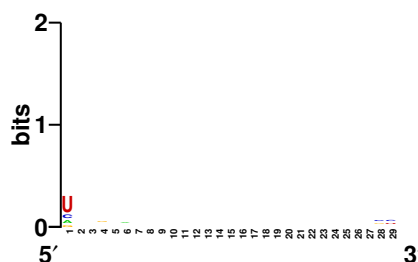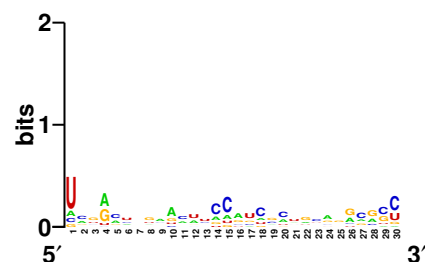

Antisense reads:

18-mers:

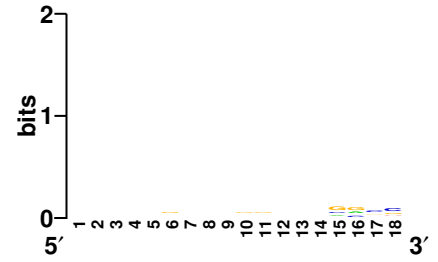

19-mers:

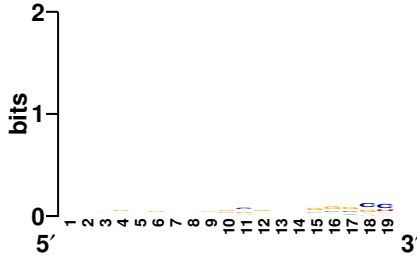

20-mers:

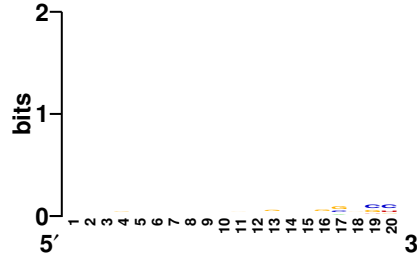

21-mers:

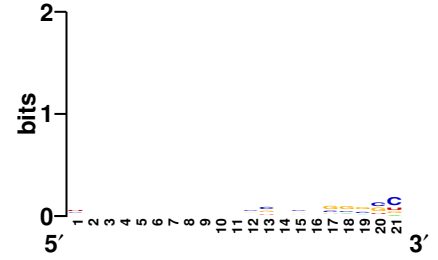

22-mers:

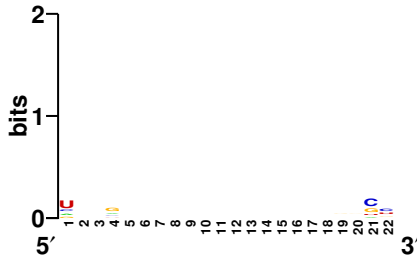

23-mers:

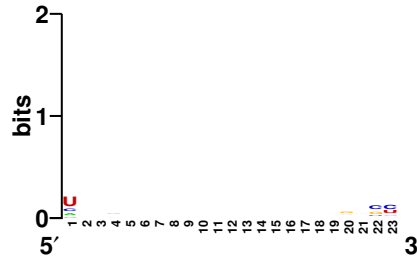

24-mers:

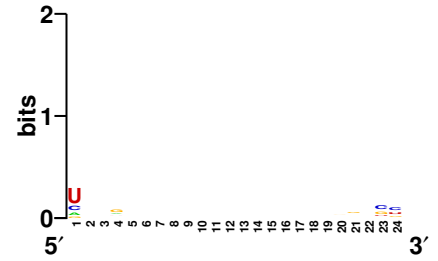

25-mers:

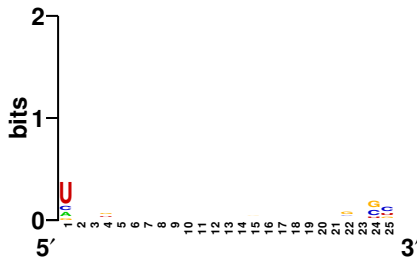

26-mers:

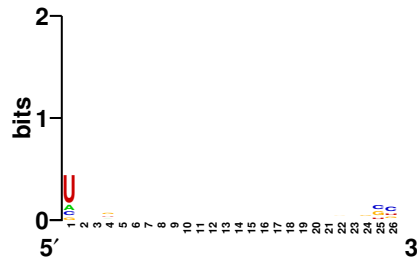

27-mers:

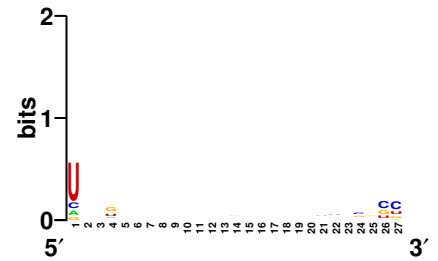

28-mers:

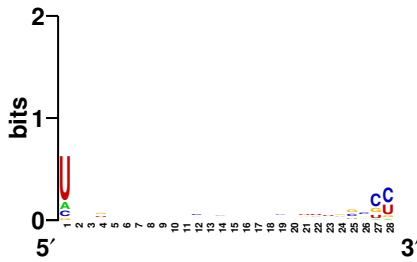

29-mers:

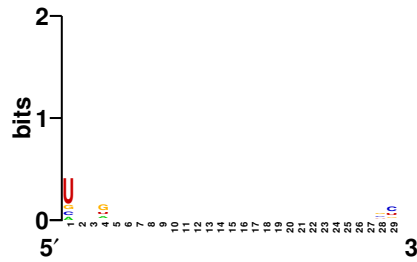

30-mers:

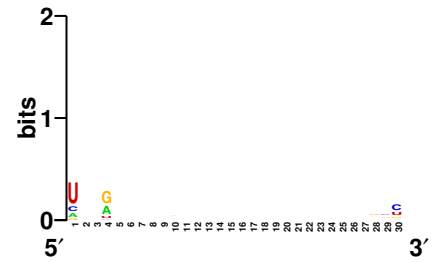

Embryo 15h, library 1:

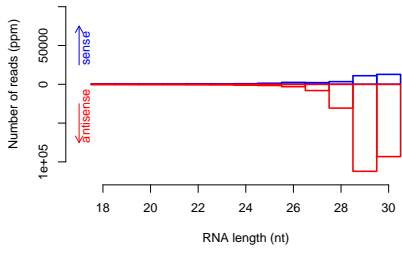

Sense reads:

18-mers:

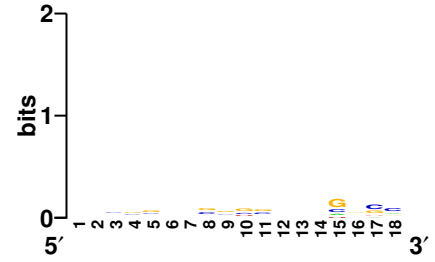

19-mers:

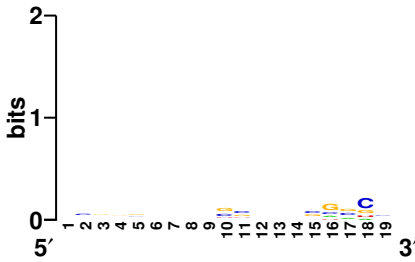

20-mers:

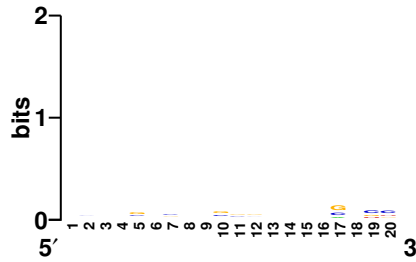

21-mers:

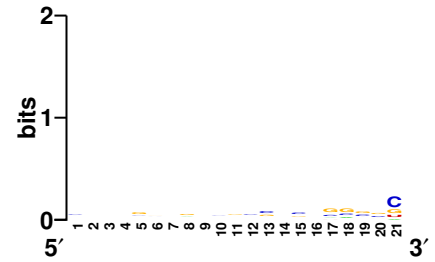

22-mers:

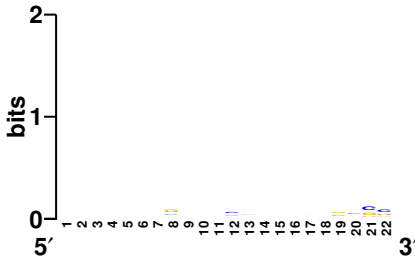

23-mers:

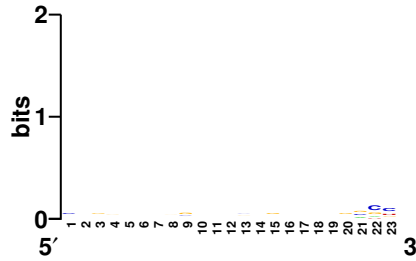

24-mers:

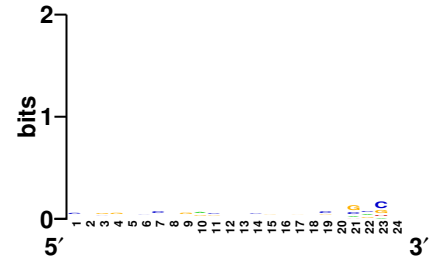

25-mers:

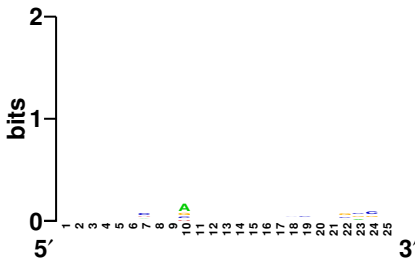

26-mers:

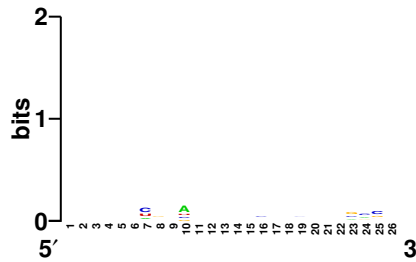

27-mers:

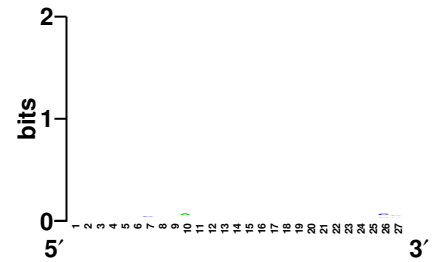

28-mers:

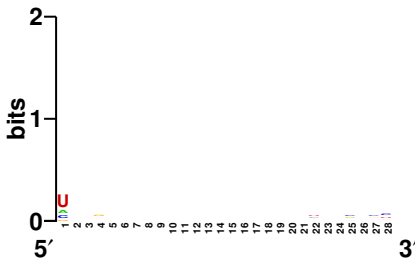

29-mers:

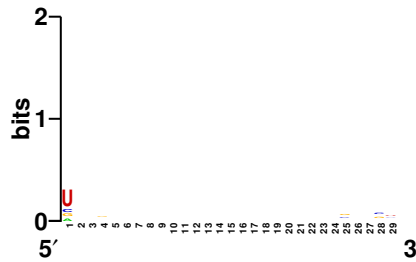

30-mers:

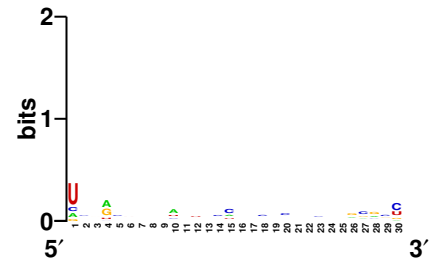



Embryo 36h, library 1:

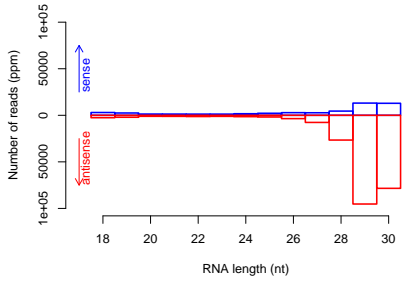

Sense reads:

18-mers:

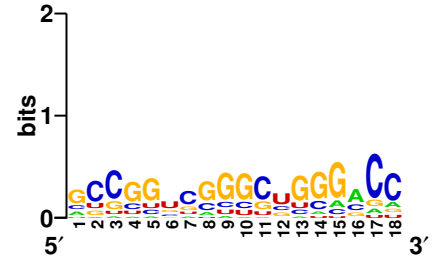

19-mers:

20-mers:

21-mers:

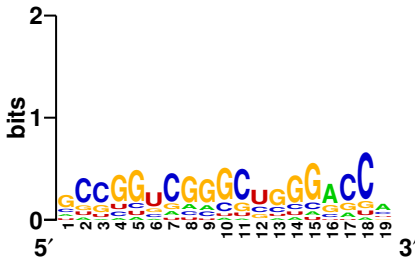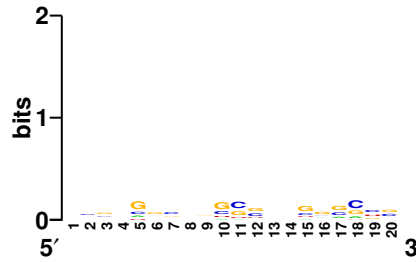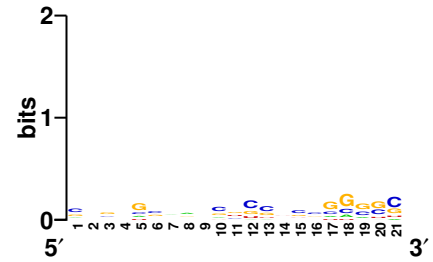

22-mers:

23-mers:

24-mers:

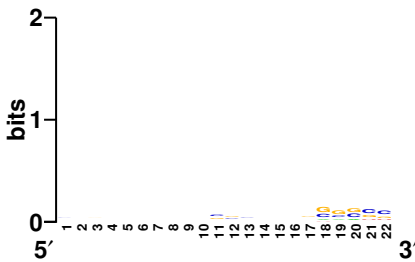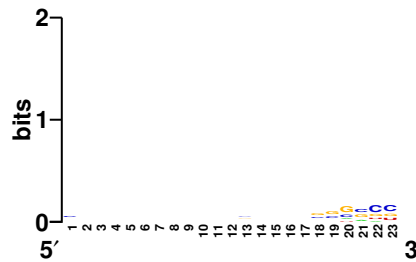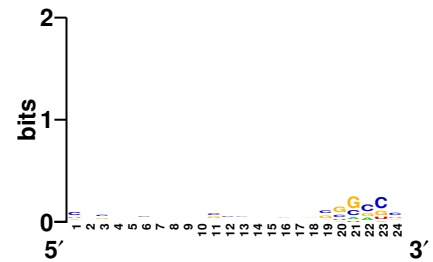

25-mers:

26-mers:

27-mers:

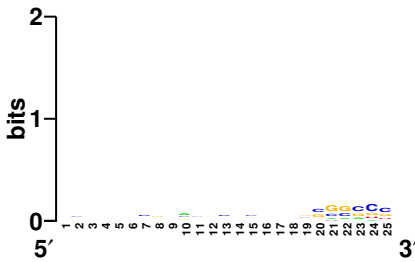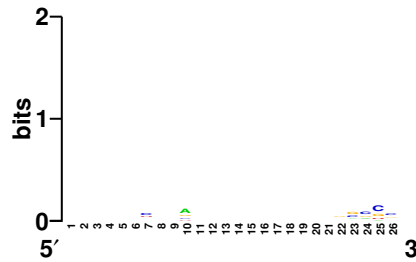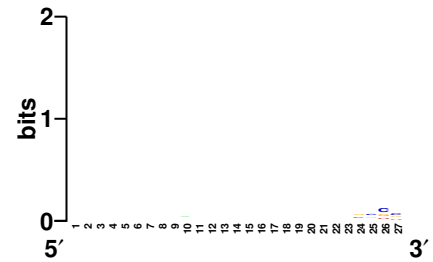

28-mers:

29-mers:

30-mers:

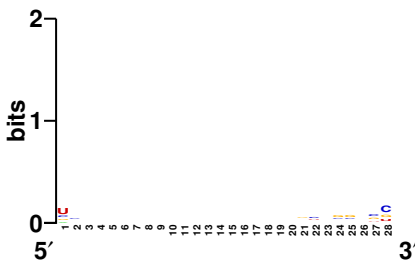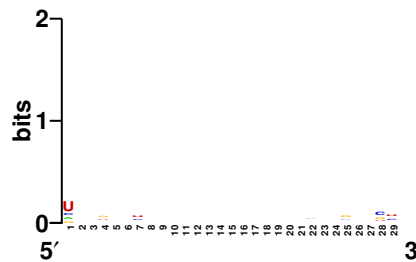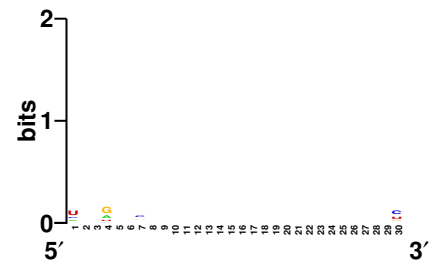





Embryo 60h, library 1:

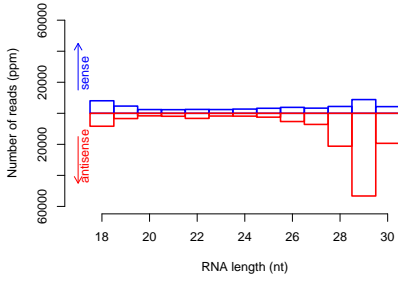

Sense reads:

18-mers:

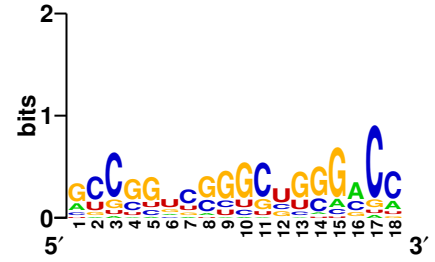

19-mers:

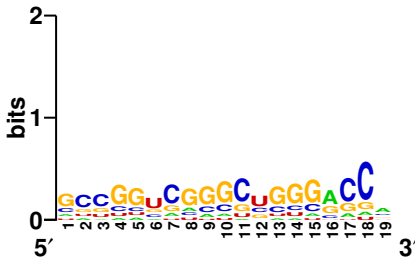

20-mers:

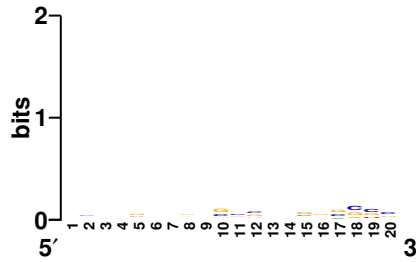

21-mers:

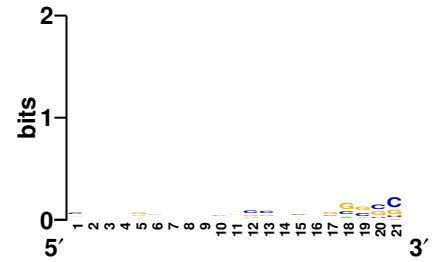

22-mers:

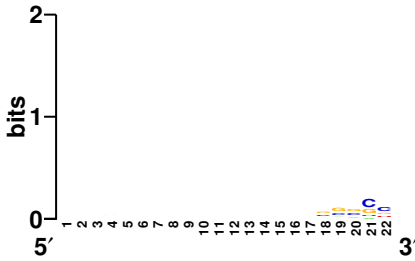

23-mers:

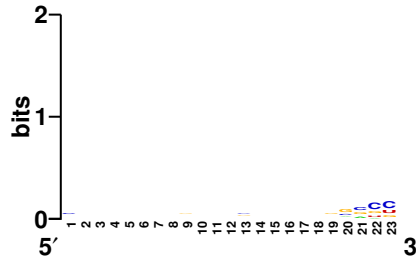

24-mers:

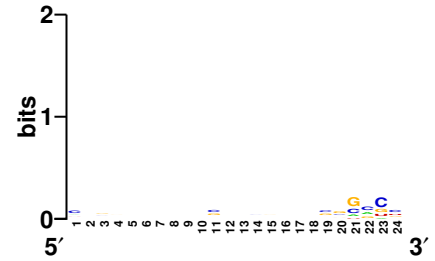

25-mers:

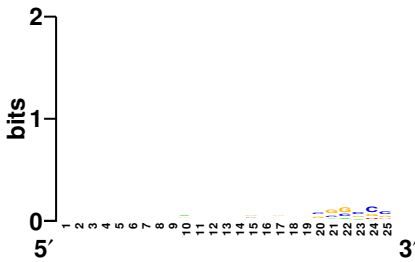

26-mers:

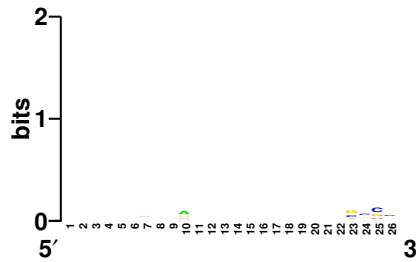

27-mers:

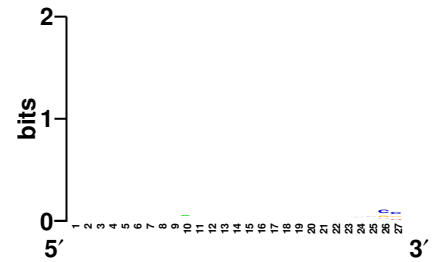

28-mers:

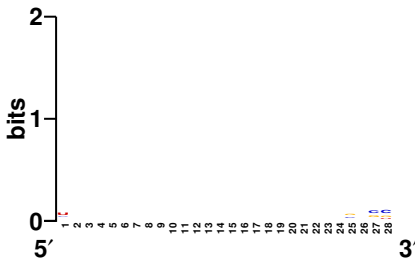

29-mers:

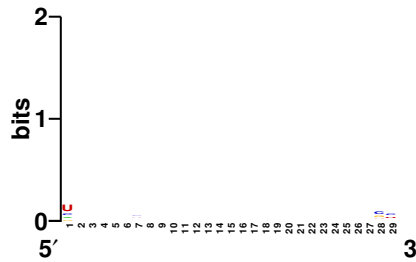

30-mers:

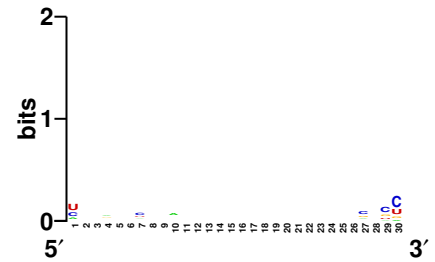

Antisense reads:

18-mers:

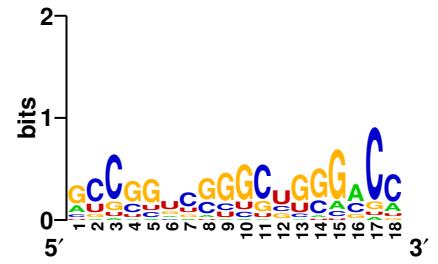

19-mers:

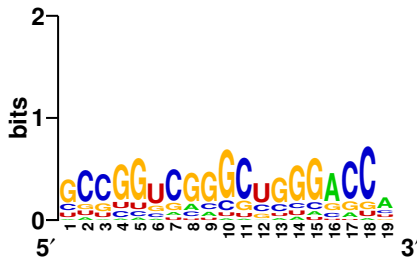

20-mers:

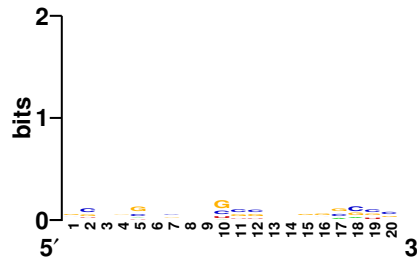

21-mers:

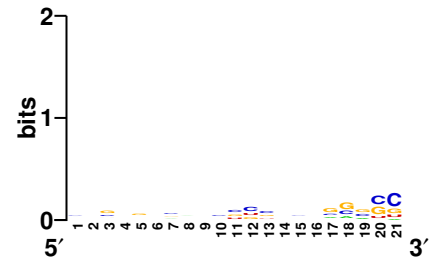

22-mers:

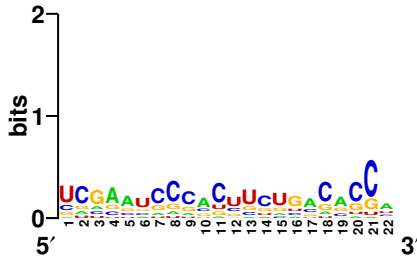

23-mers:

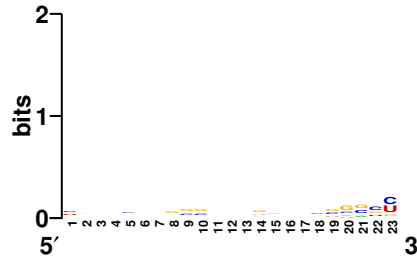

24-mers:

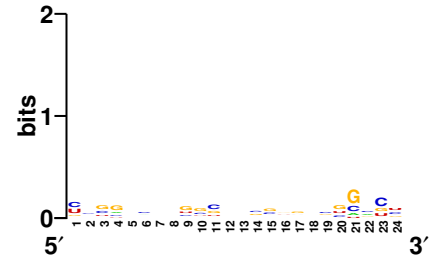

25-mers:

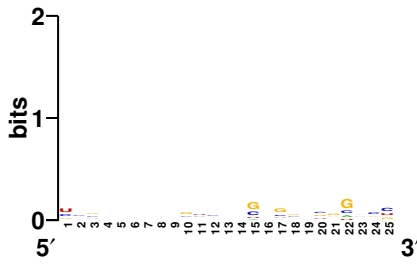

26-mers:

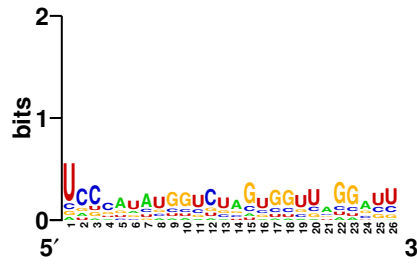

27-mers:

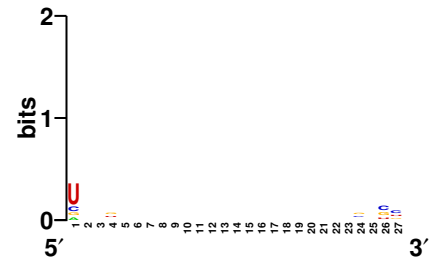

28-mers:

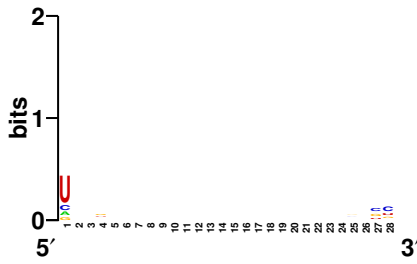

29-mers:

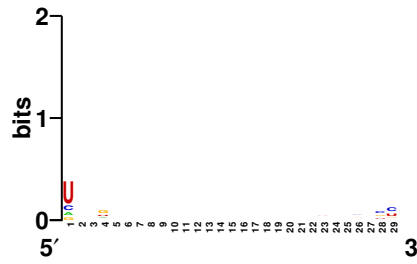

30-mers:

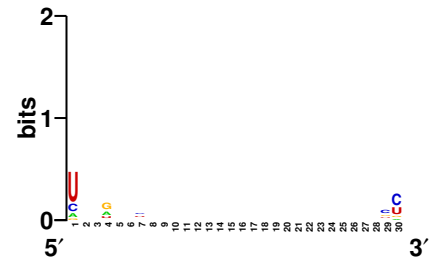

Adult female, library 1:

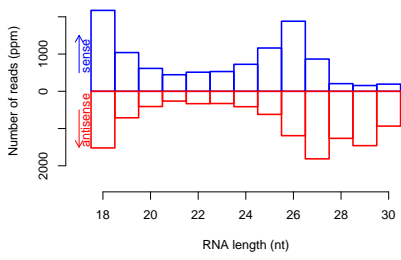

Sense reads:

18-mers:

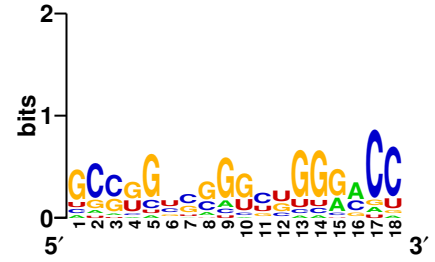

19-mers:

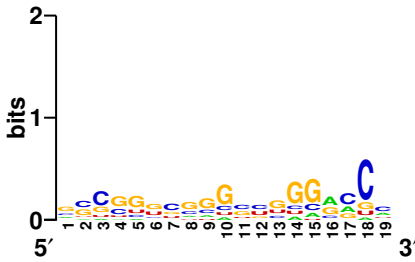

20-mers:

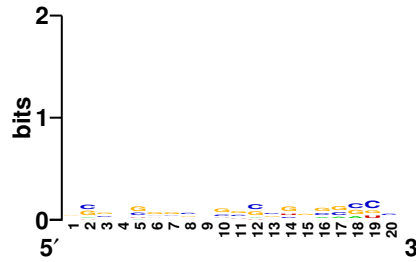

21-mers:

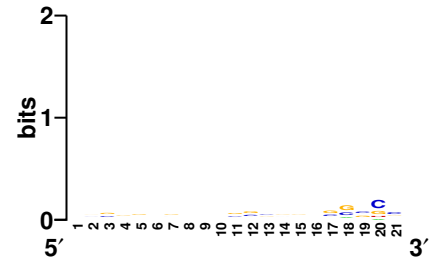

22-mers:

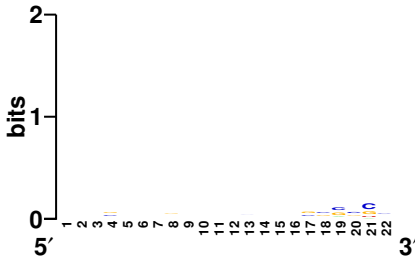

23-mers:

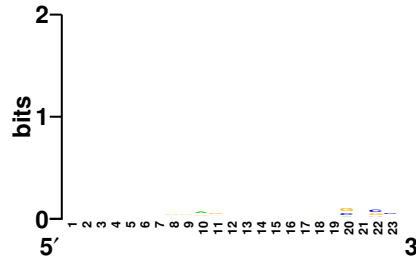

24-mers:

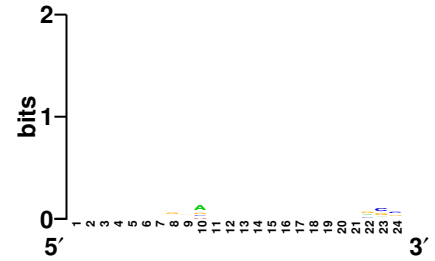

25-mers:

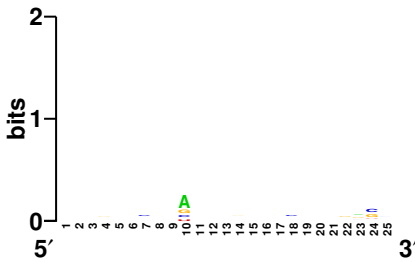

26-mers:

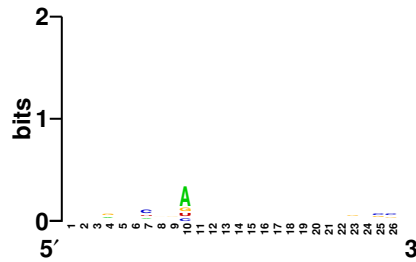

27-mers:

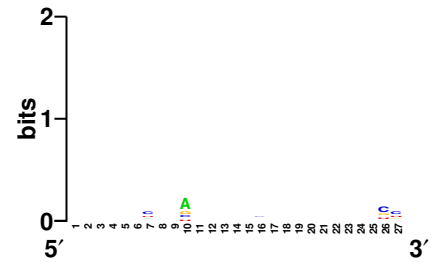

28-mers:

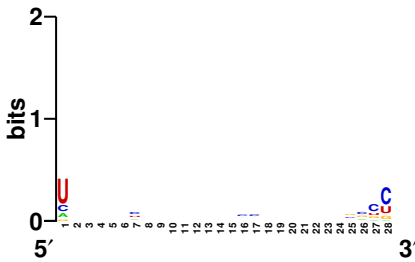

29-mers:

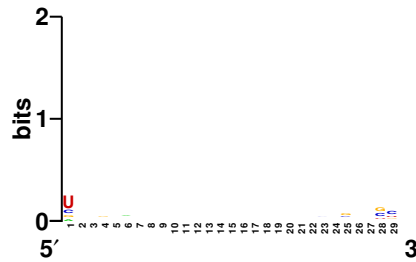

30-mers:

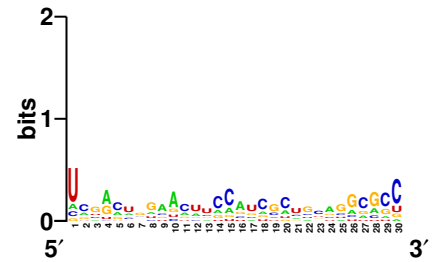

Antisense reads:

18-mers:

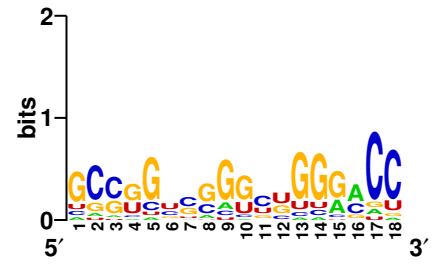

19-mers:

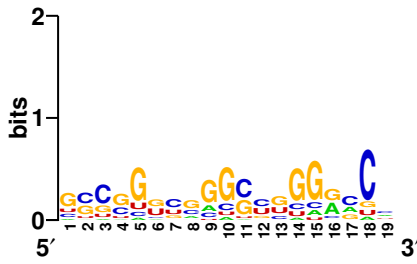

20-mers:

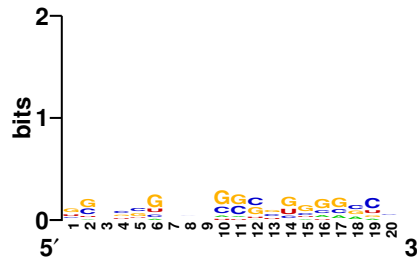

21-mers:

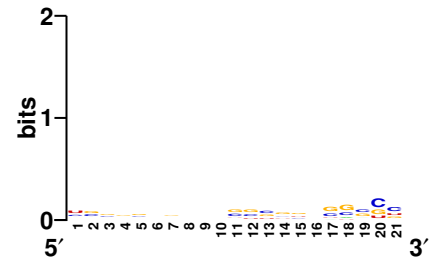

22-mers:

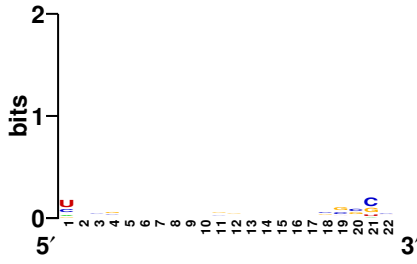

23-mers:

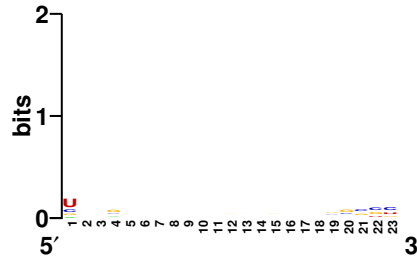

24-mers:

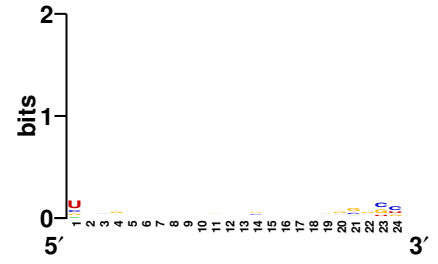

25-mers:

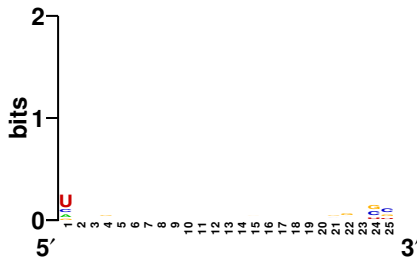

26-mers:

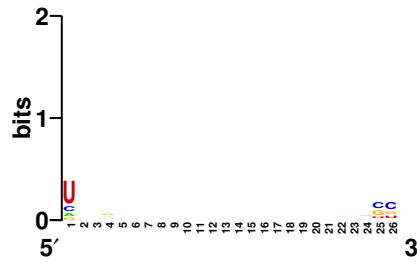

27-mers:

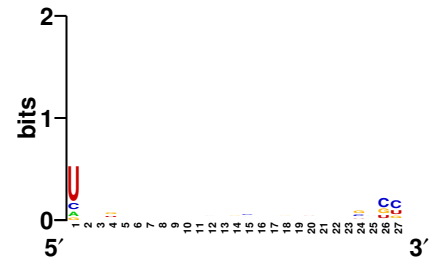

28-mers:

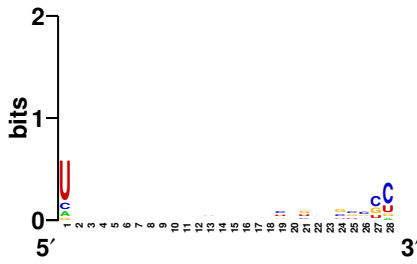

29-mers:

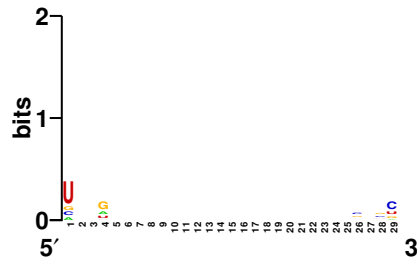

30-mers:

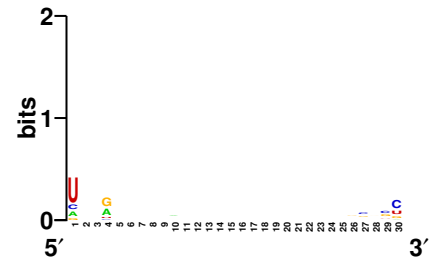

Adult male, library 1:

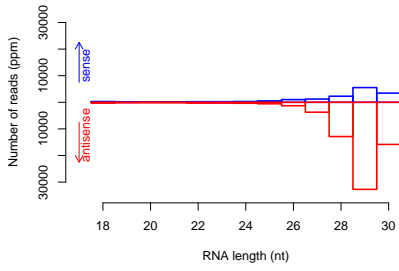

Sense reads:

18-mers:

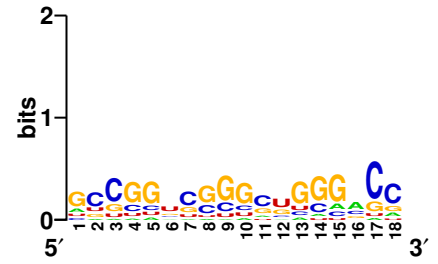

19-mers:

20-mers:

21-mers:

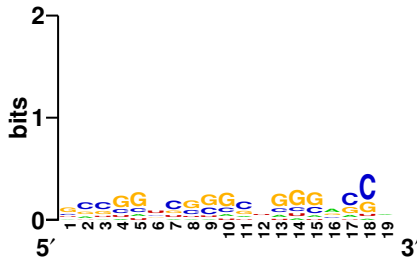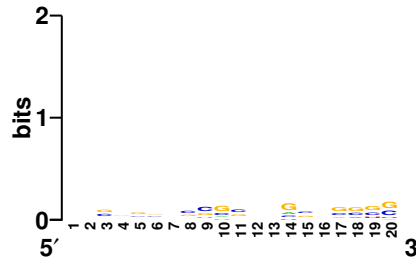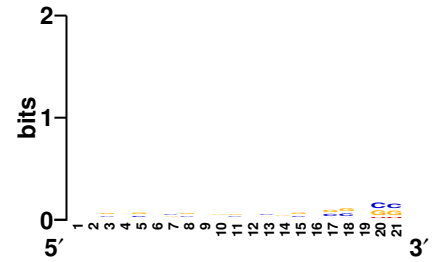

22-mers:

23-mers:

24-mers:

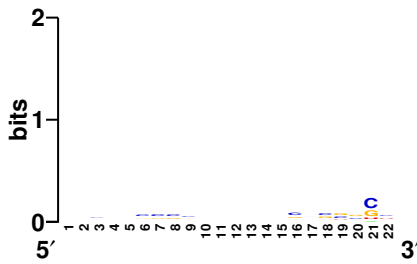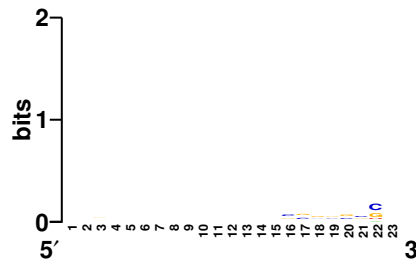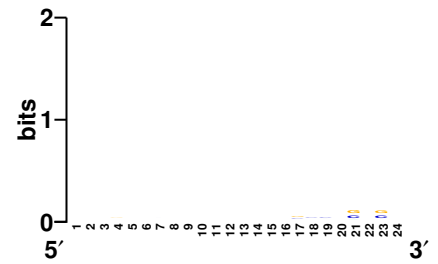

25-mers:

26-mers:

27-mers:

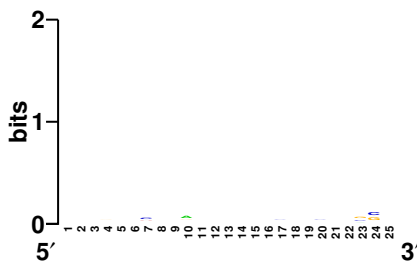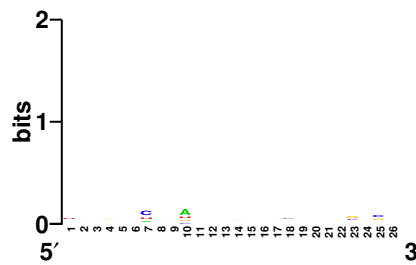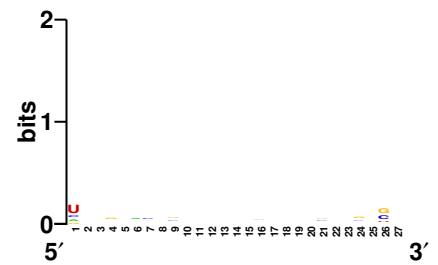

28-mers:

29-mers:

30-mers:

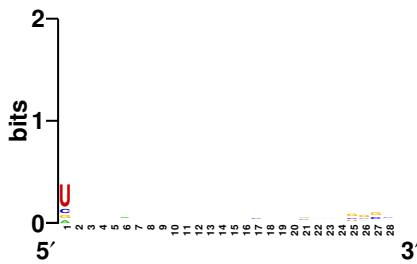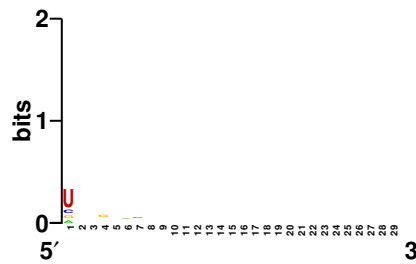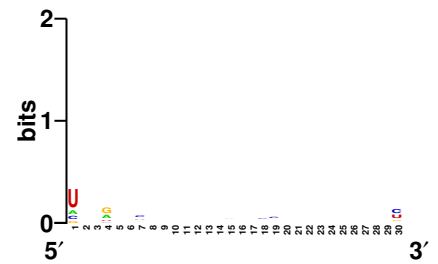

Antisense reads:

18-mers:

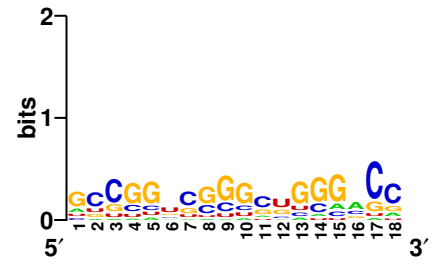

19-mers:

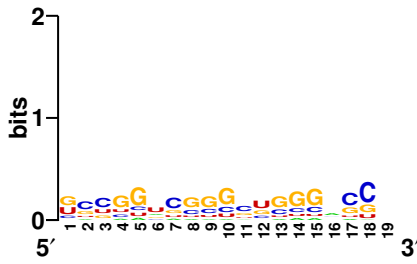

20-mers:

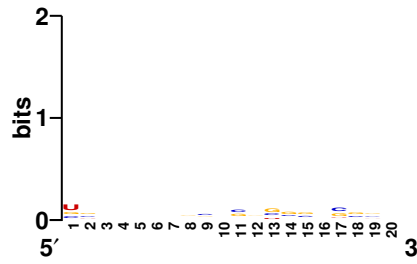

21-mers:

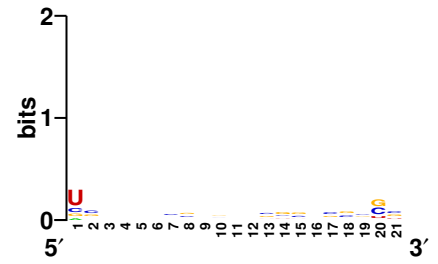

22-mers:

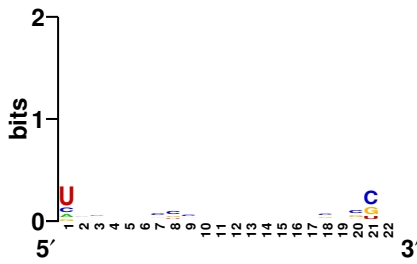

23-mers:

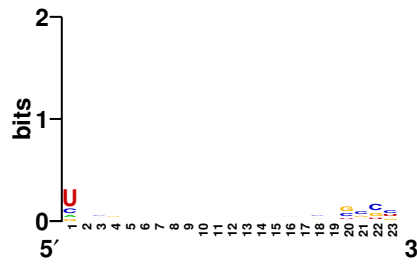

24-mers:

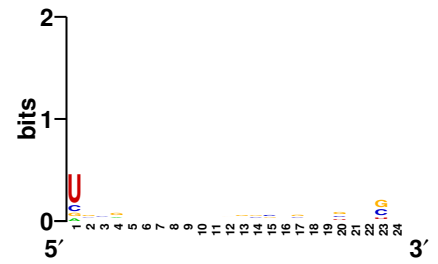

25-mers:

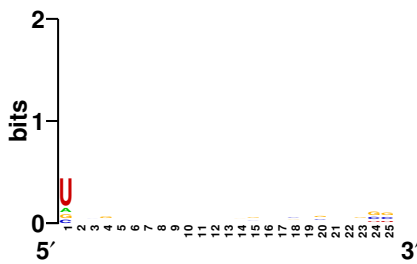

26-mers:

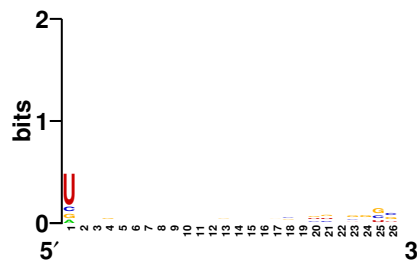

27-mers:

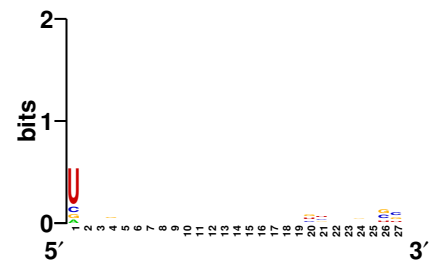

28-mers:

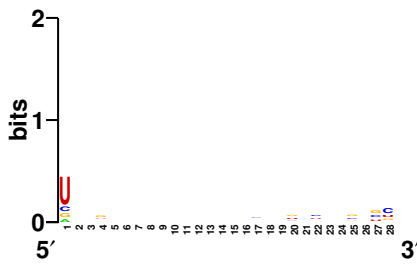

29-mers:

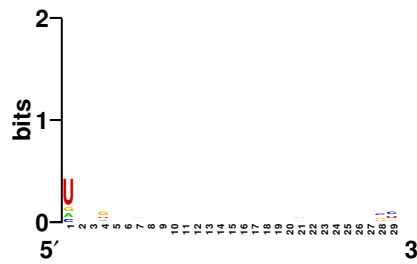

30-mers:

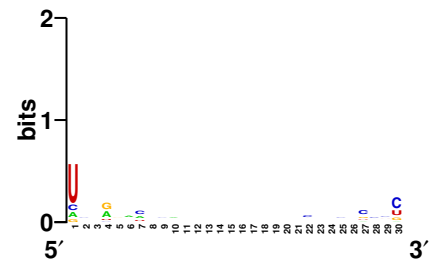

## 4.2 Libraries #2 (3' modified, 5' monophosphorylated small RNAs)

Embryo 8h, library 2:

Sense reads:

18-mers:

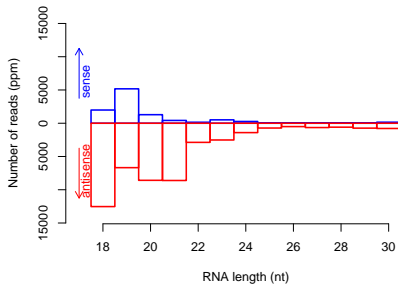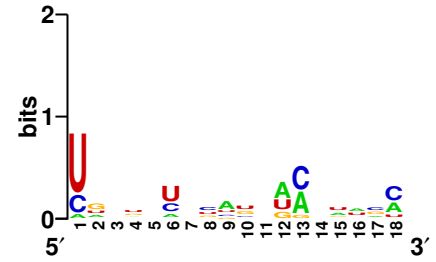

19-mers:

20-mers:

21-mers:

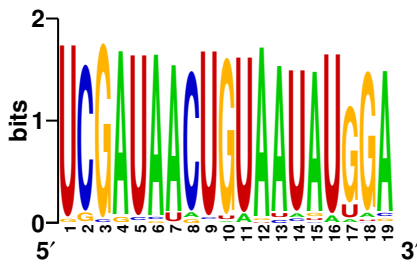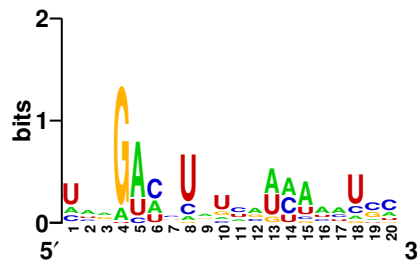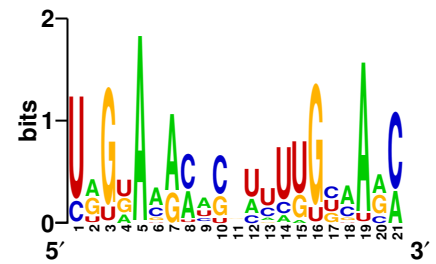

22-mers:

23-mers:

24-mers:

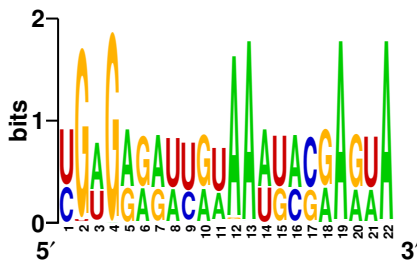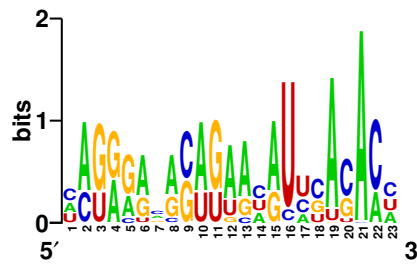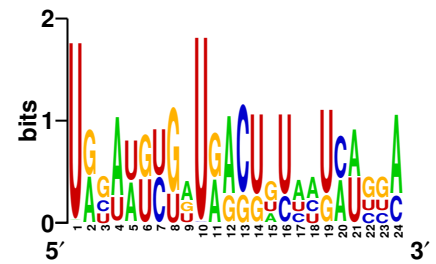

25-mers:

26-mers:

27-mers:

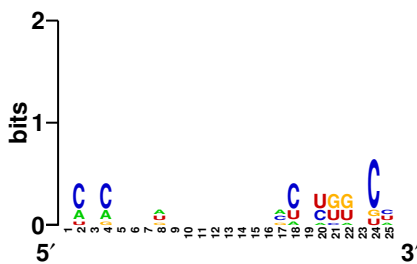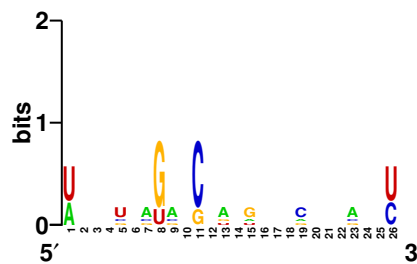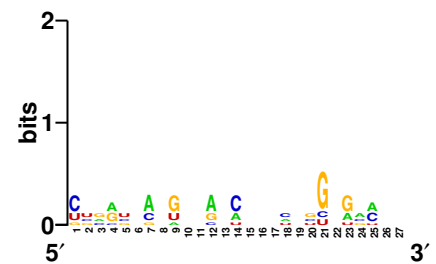

28-mers:

29-mers:

30-mers:

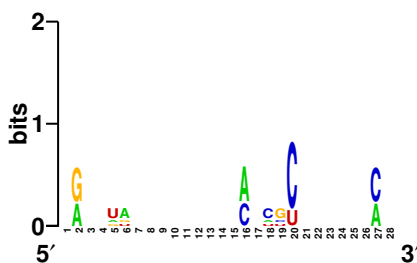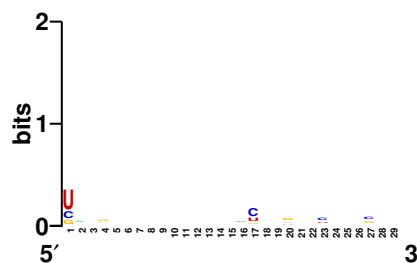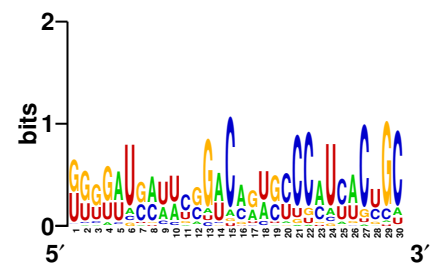

Antisense reads:

18-mers:

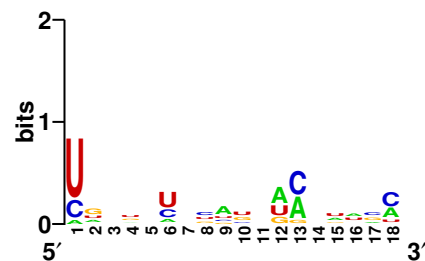

19-mers:

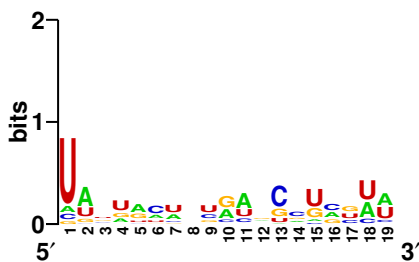

20-mers:

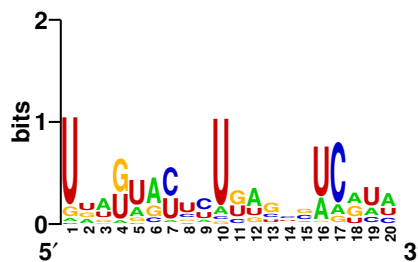

21-mers:

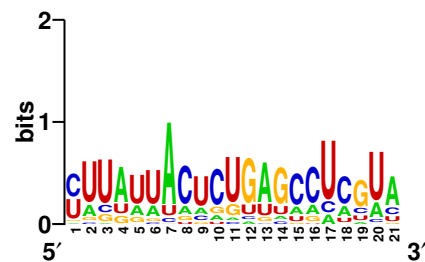

22-mers:

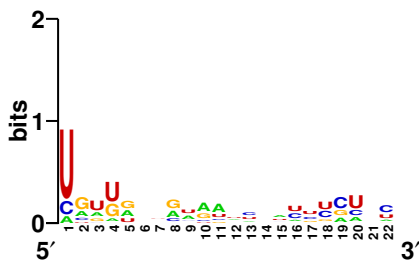

23-mers:

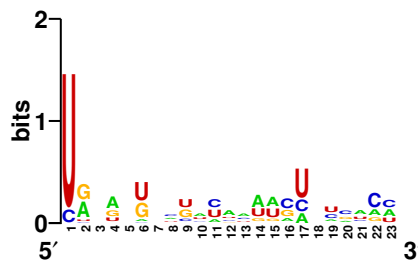

24-mers:

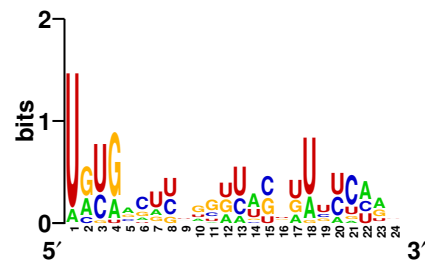

25-mers:

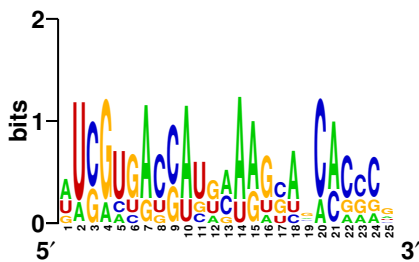

26-mers:

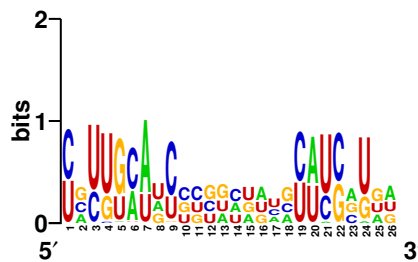

27-mers:

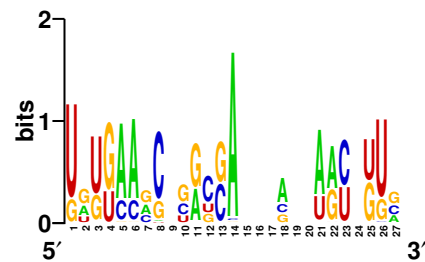

28-mers:

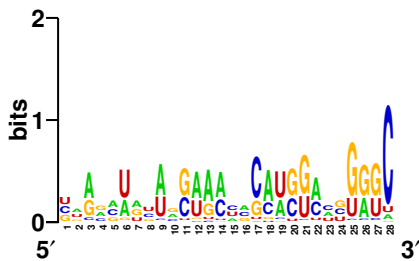

29-mers:

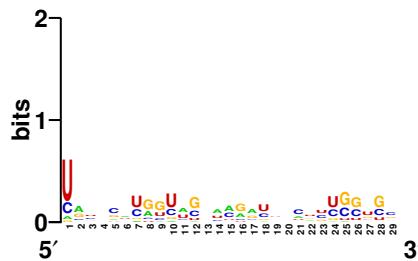

30-mers:

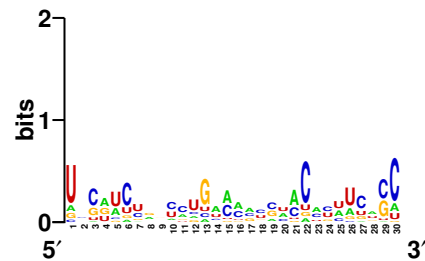







Embryo 36h, library 2:

Sense reads:

18-mers:

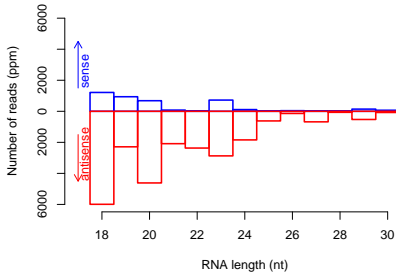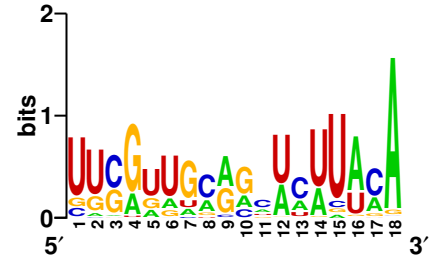

19-mers:

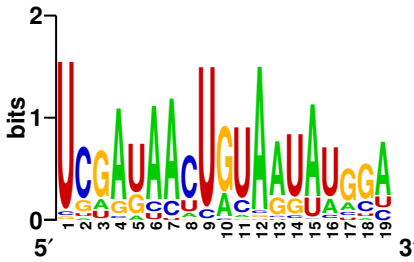

20-mers:

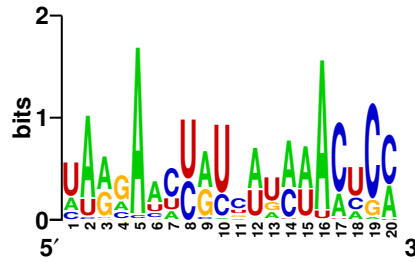

21-mers:

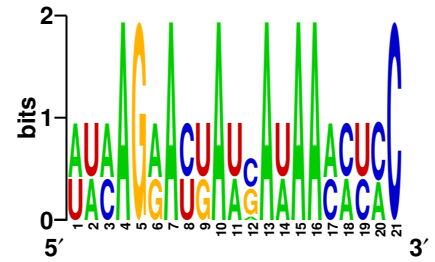

22-mers:

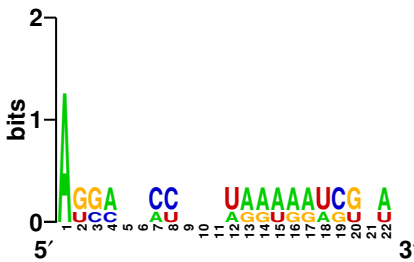

23-mers:

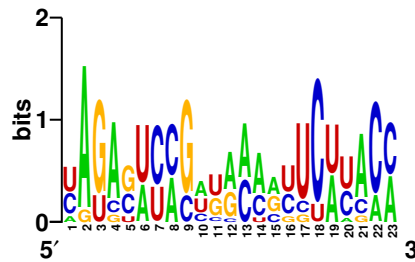

24-mers:

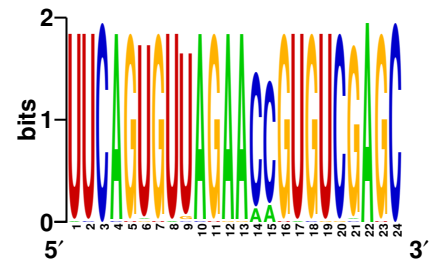

25-mers:

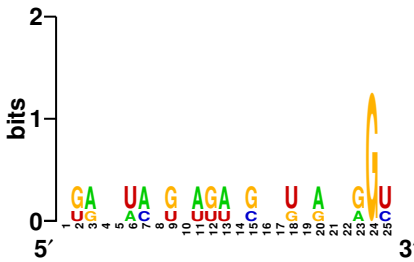

26-mers:

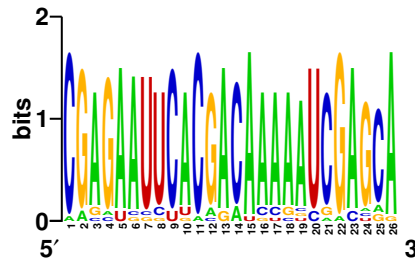

27-mers:

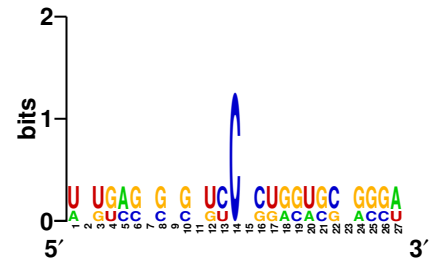

28-mers:

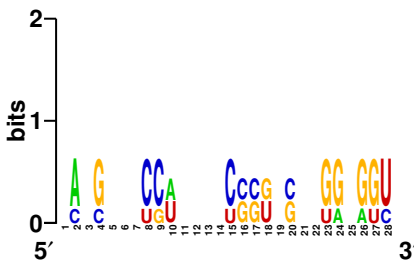

29-mers:

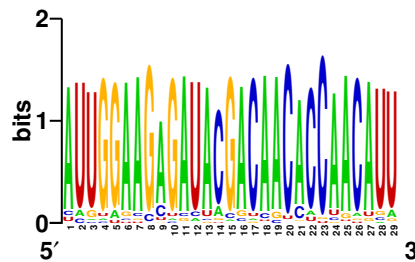

30-mers:

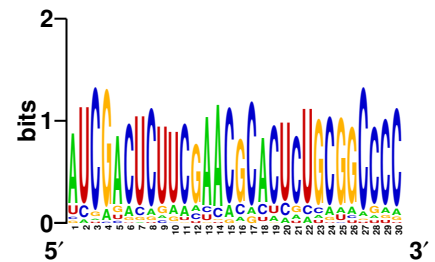

Antisense reads:

18-mers:

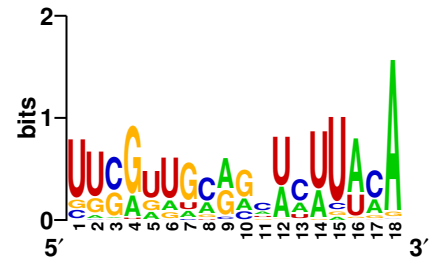

19-mers:

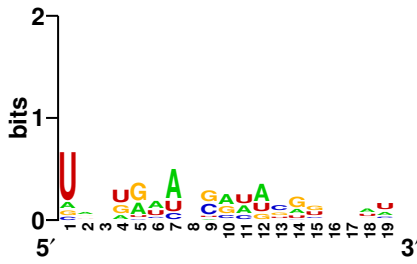

20-mers:

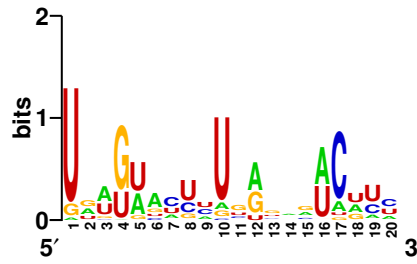

21-mers:

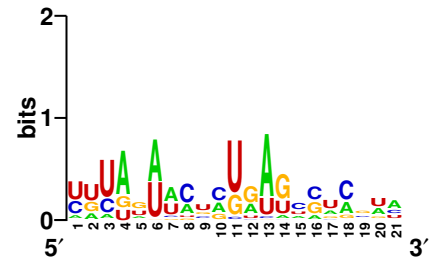

22-mers:

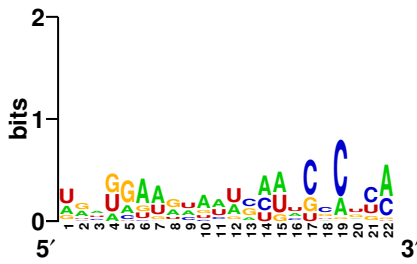

23-mers:

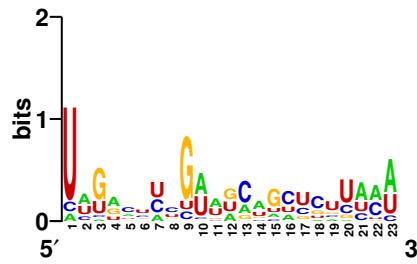

24-mers:

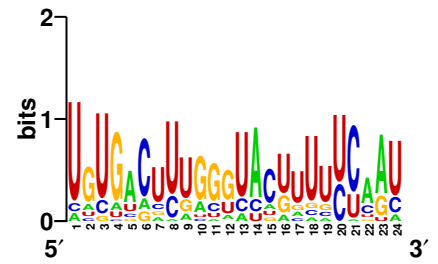

25-mers:

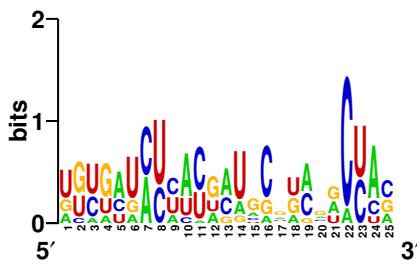

26-mers:

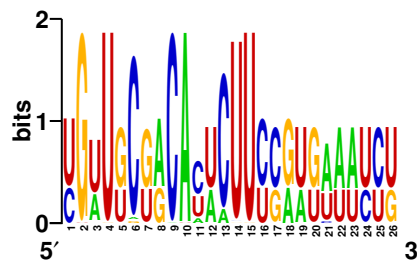

27-mers:

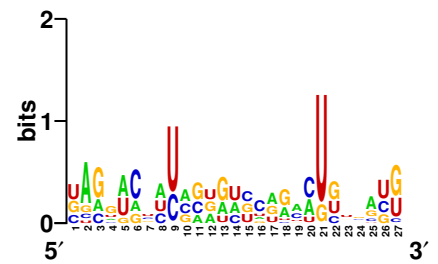

28-mers:

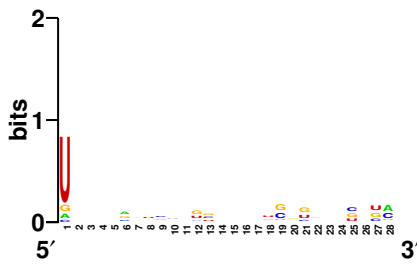

29-mers:

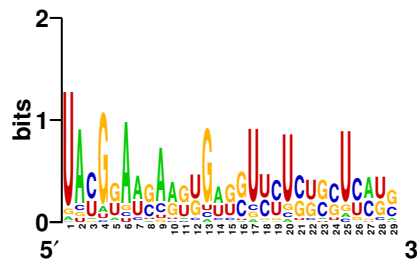

30-mers:

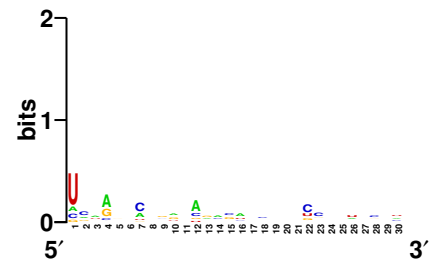

Embryo 60h, library 2:

Sense reads:

18-mers:

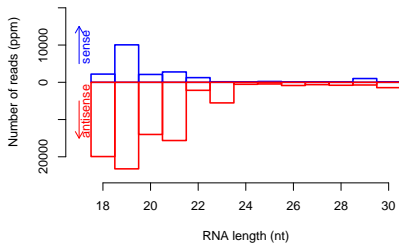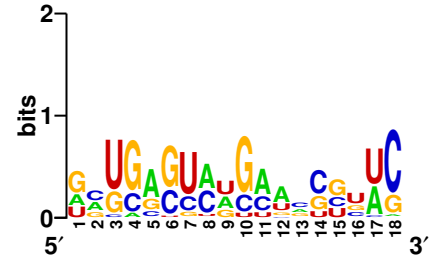

19-mers:

20-mers:

21-mers:

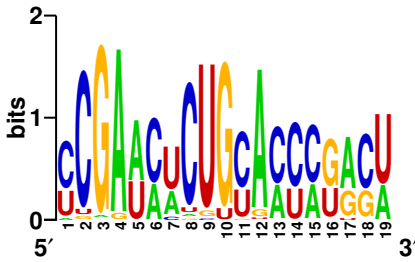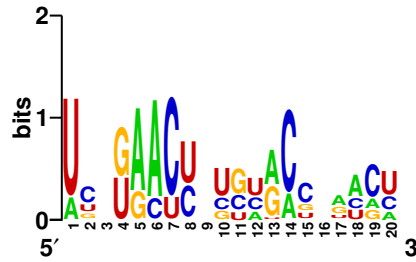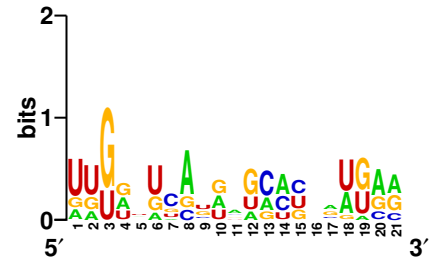

22-mers:

23-mers:

24-mers:

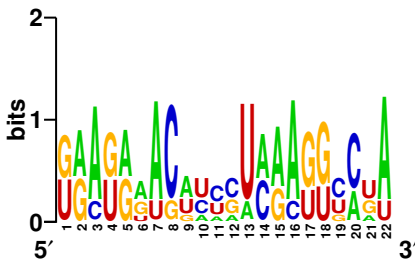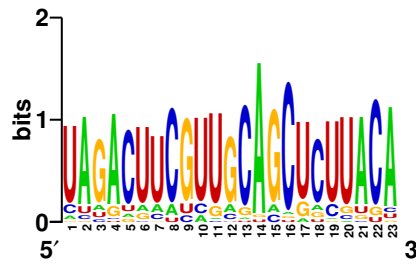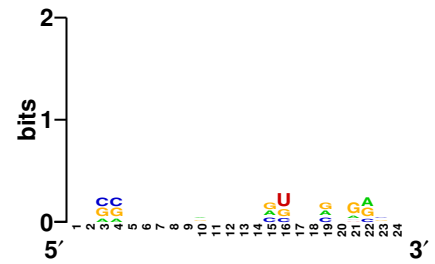

25-mers:

26-mers:

27-mers:

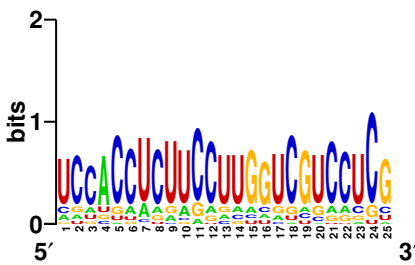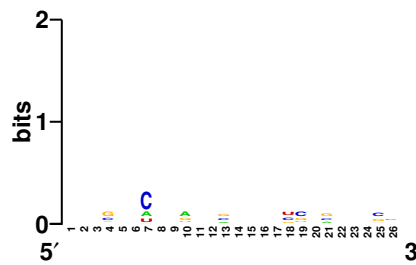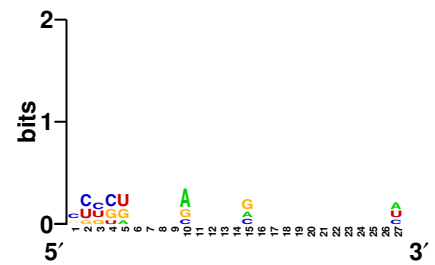

28-mers:

29-mers:

30-mers:

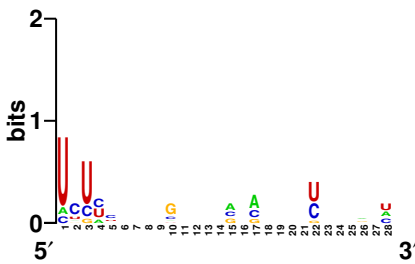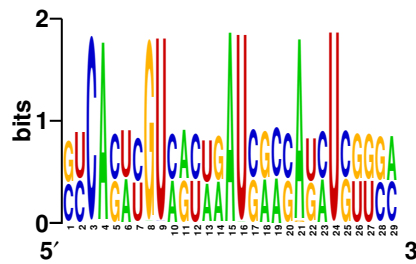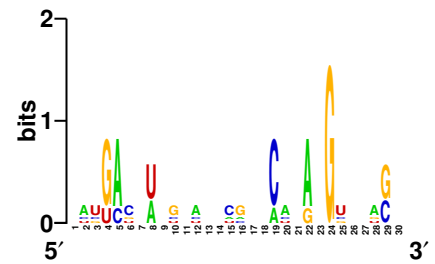

Antisense reads:

18-mers:

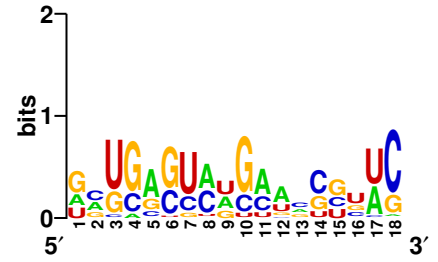

19-mers:

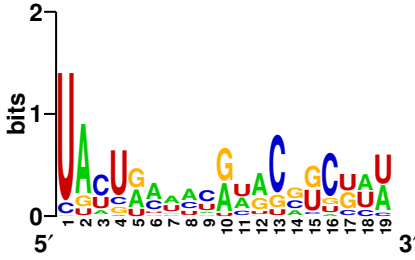

20-mers:

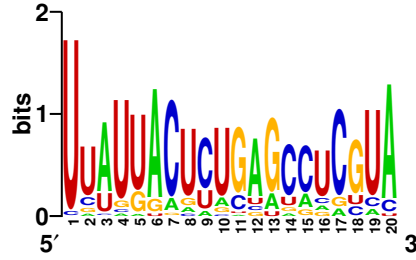

21-mers:

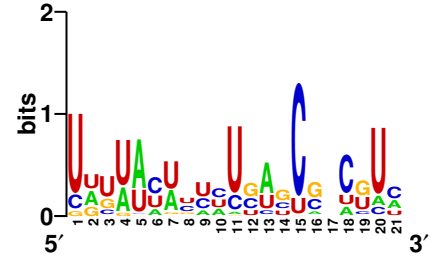

22-mers:

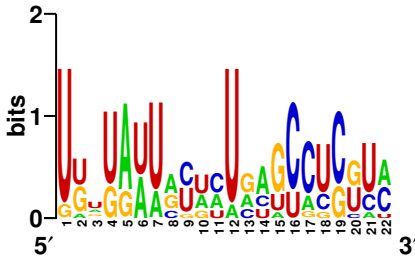

23-mers:

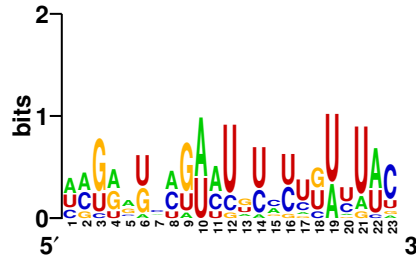

24-mers:

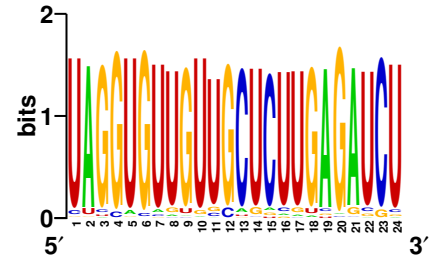

25-mers:

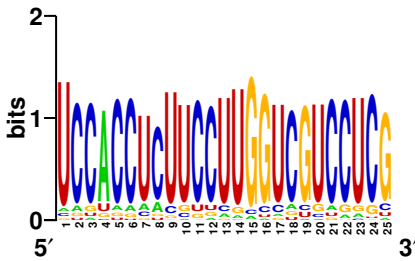

26-mers:

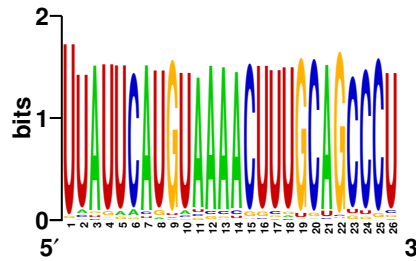

27-mers:

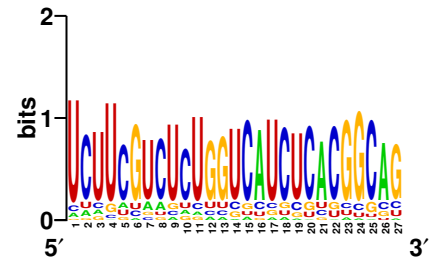

28-mers:

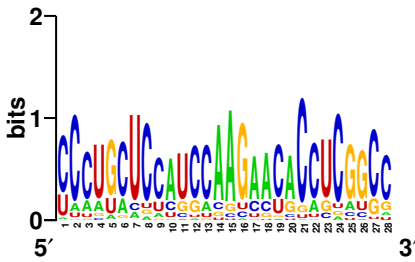

29-mers:

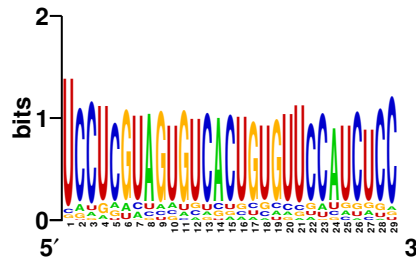

30-mers:

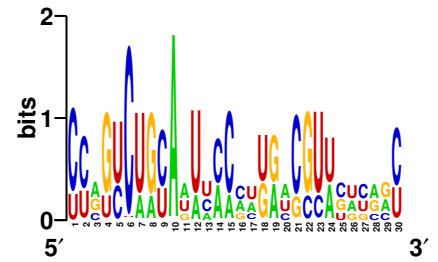







Adult male, library 2:

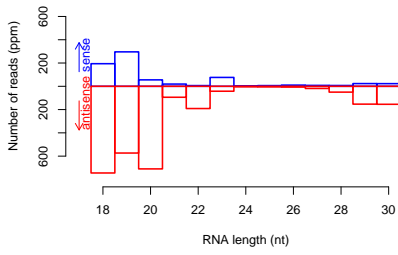

Sense reads:

18-mers:

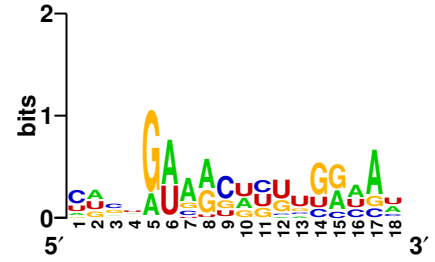

19-mers:

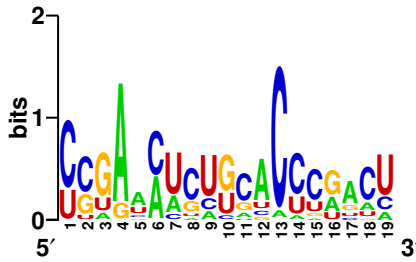

20-mers:

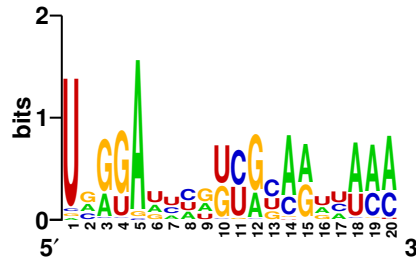

21-mers:

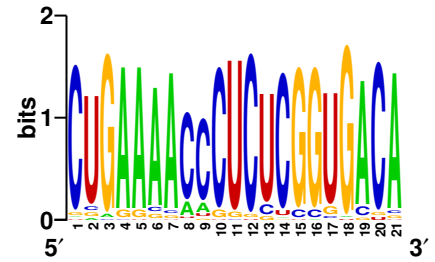

22-mers:

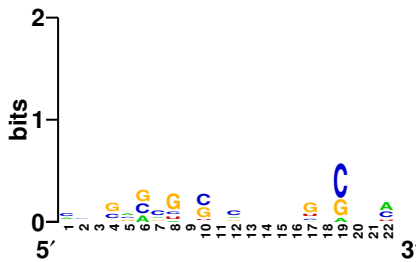

23-mers:

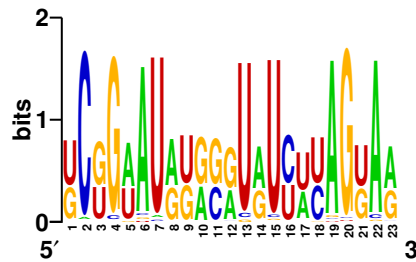

24-mers:

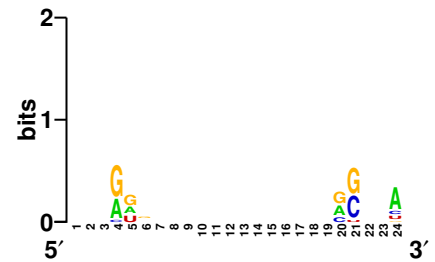

25-mers:

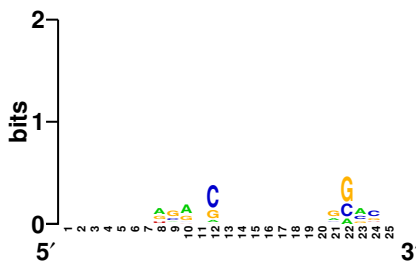

26-mers:

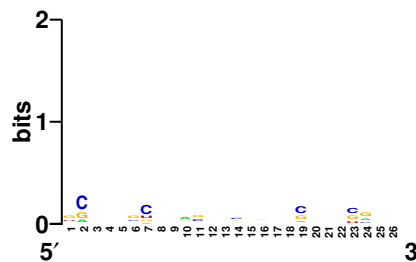

27-mers:

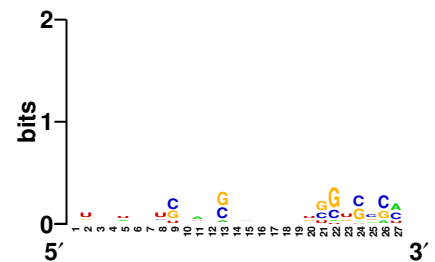

28-mers:

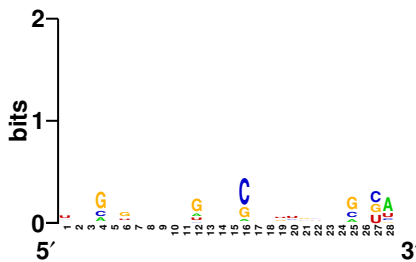

29-mers:

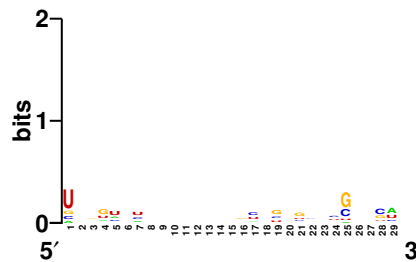

30-mers:

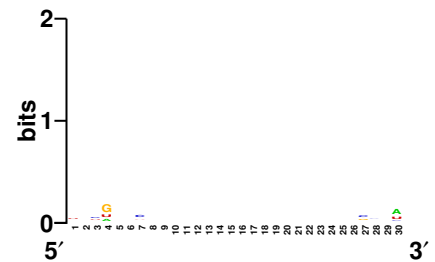



### 4.3 Libraries #3 (total 5' hydroxyl or polyphosphorylated small RNAs)

Embryo 8h, library 3:

Sense reads:

18-mers:

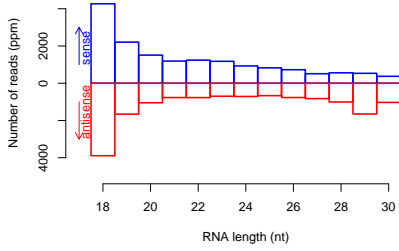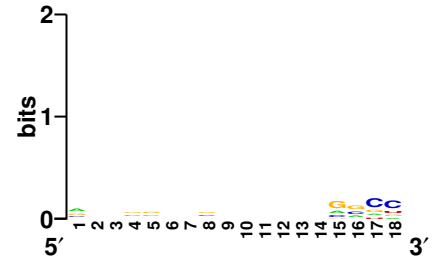

19-mers:

20-mers:

21-mers:

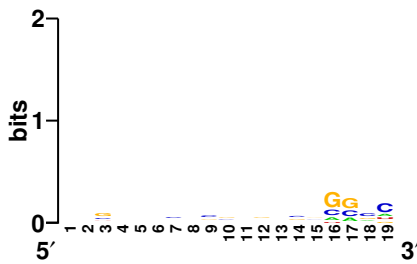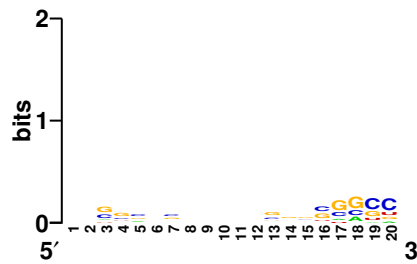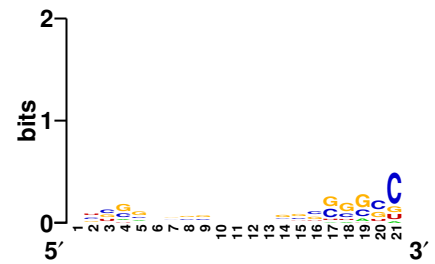

22-mers:

23-mers:

24-mers:

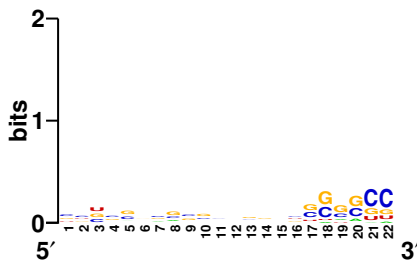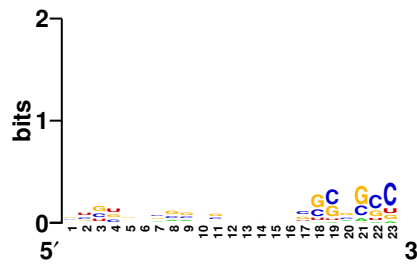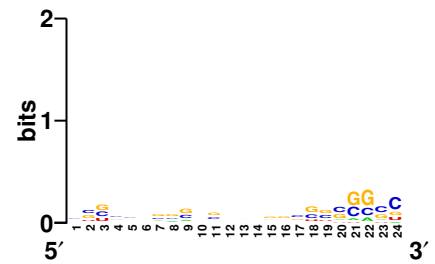

25-mers:

26-mers:

27-mers:

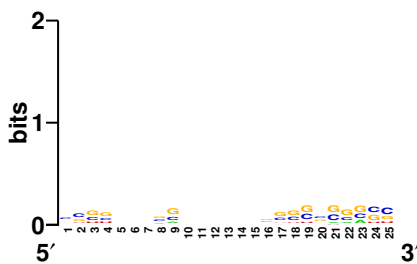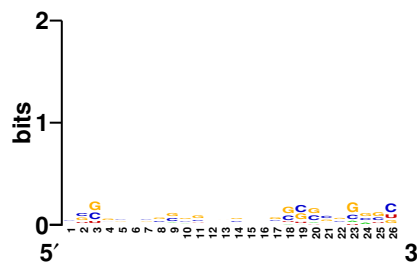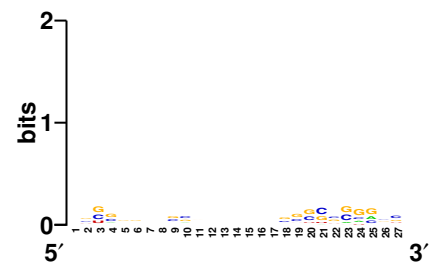

28-mers:

29-mers:

30-mers:

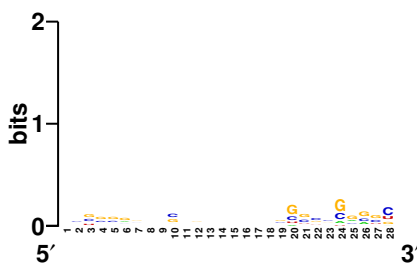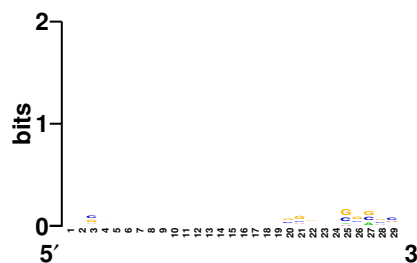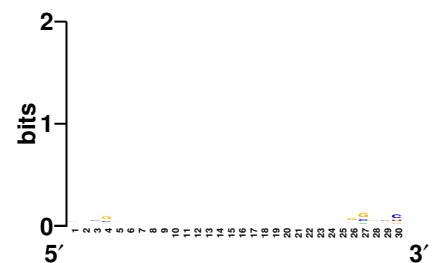



Embryo 15h, library 3:

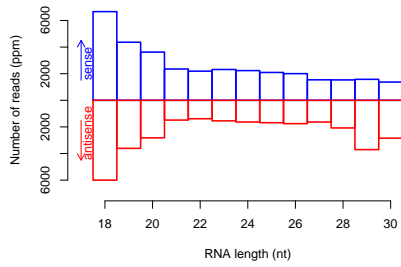

Sense reads:

18-mers:

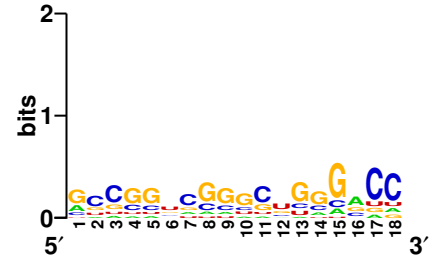

19-mers:

20-mers:

21-mers:

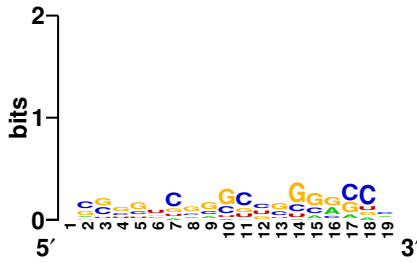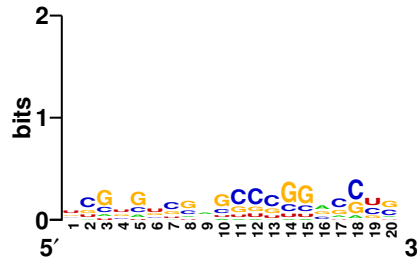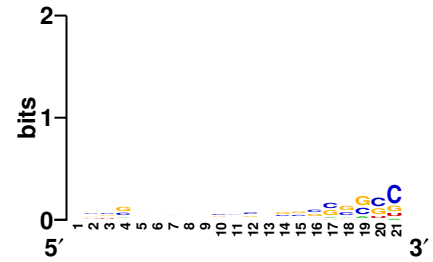

22-mers:

23-mers:

24-mers:

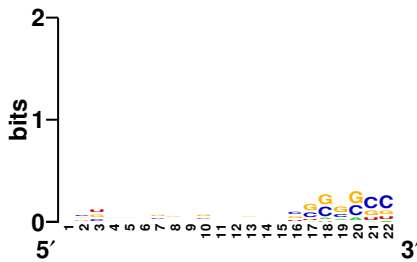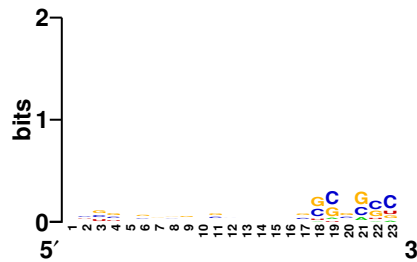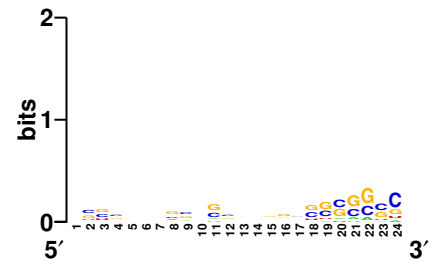

25-mers:

26-mers:

27-mers:

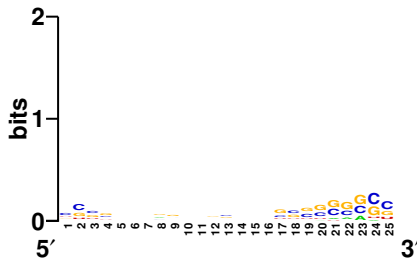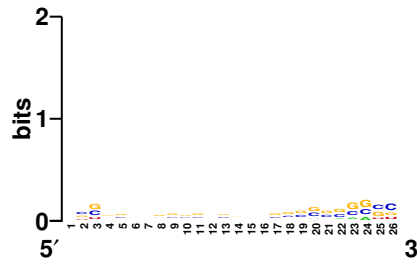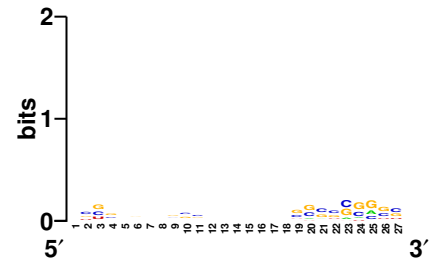

28-mers:

29-mers:

30-mers:

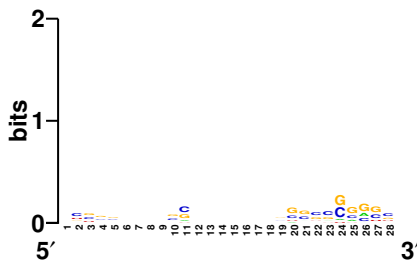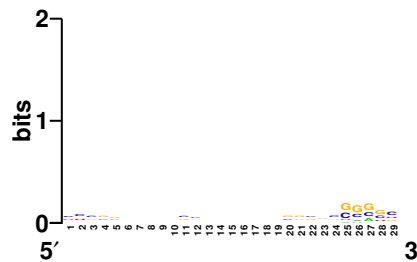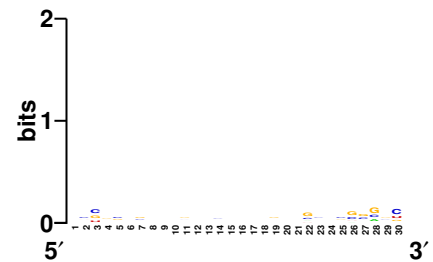



Embryo 36h, library 3:

Sense reads:

18-mers:

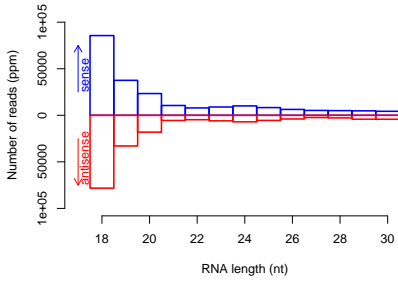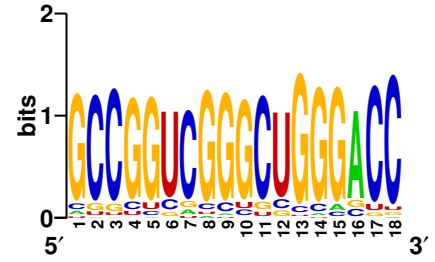

19-mers:

20-mers:

21-mers:

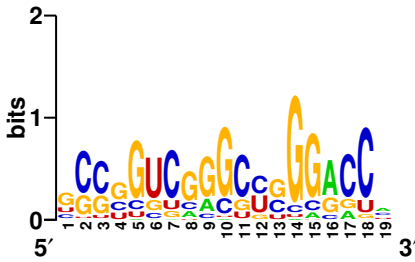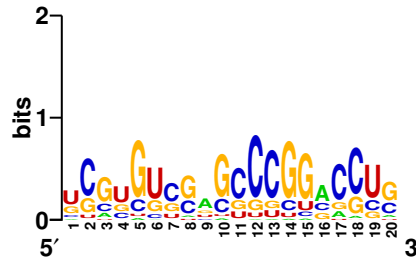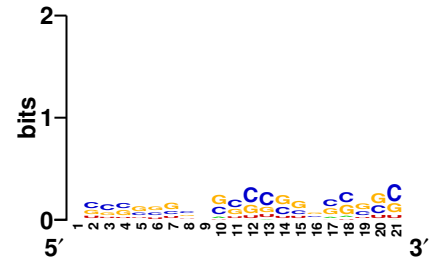

22-mers:

23-mers:

24-mers:

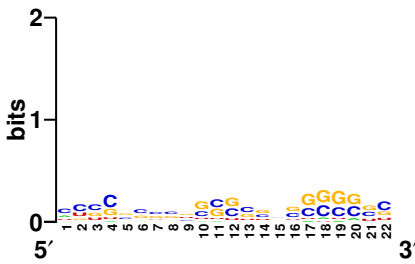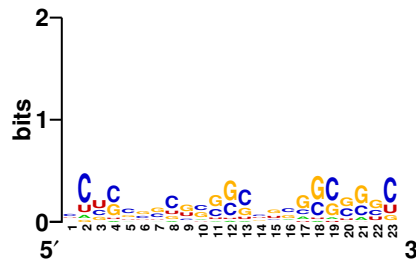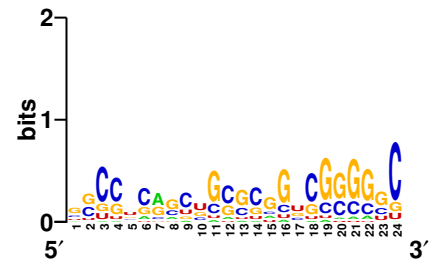

25-mers:

26-mers:

27-mers:

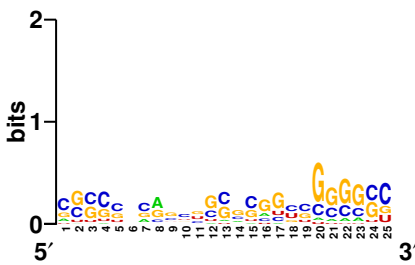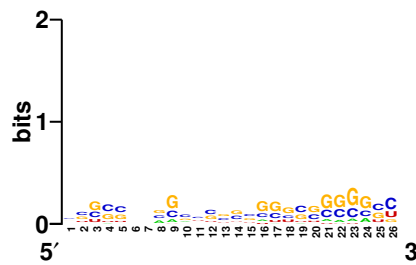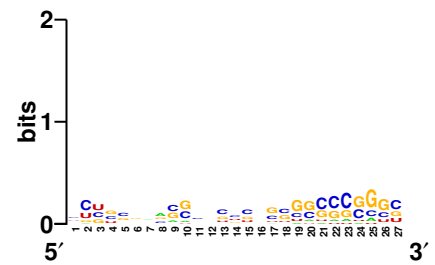

28-mers:

29-mers:

30-mers:

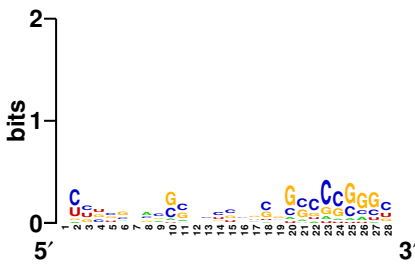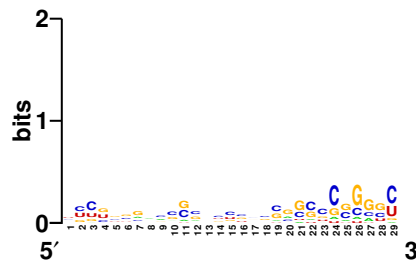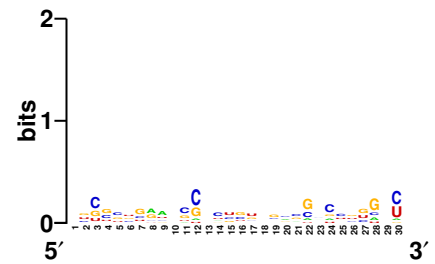

Antisense reads:

18-mers:

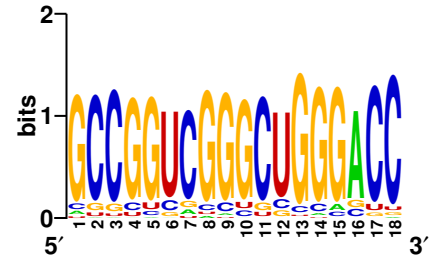

19-mers:

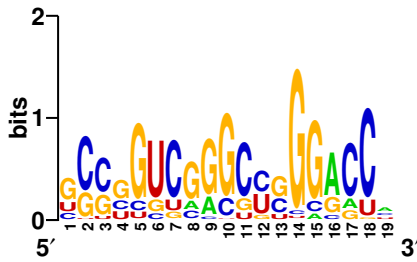

20-mers:

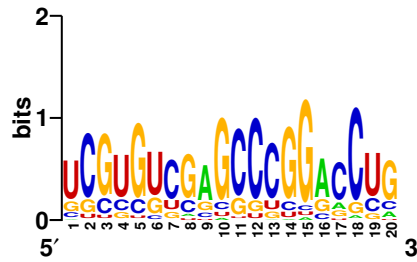

21-mers:

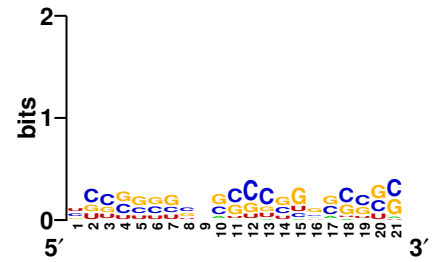

22-mers:

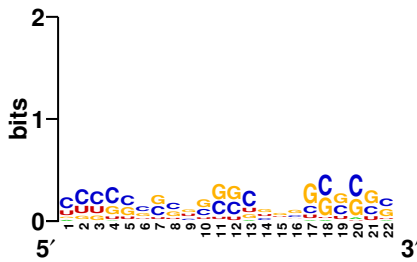

23-mers:

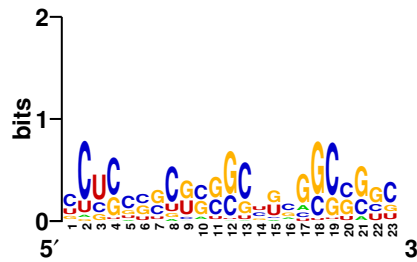

24-mers:

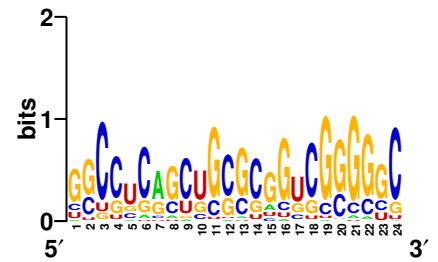

25-mers:

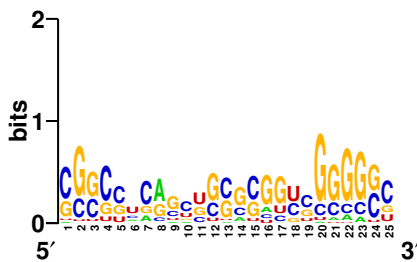

26-mers:

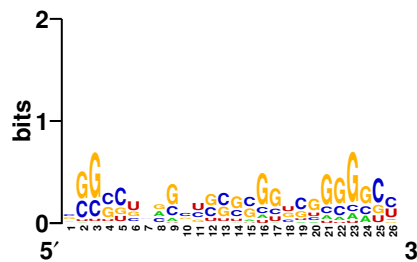

27-mers:

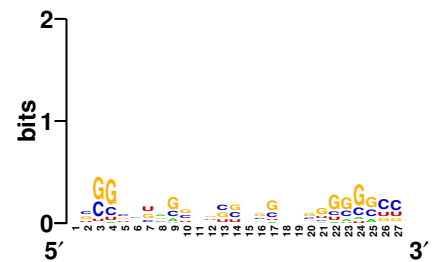

28-mers:

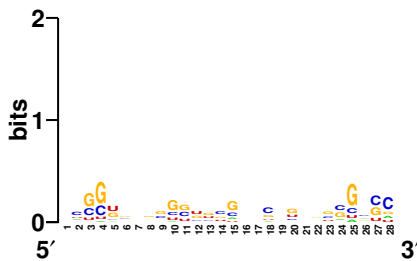

29-mers:

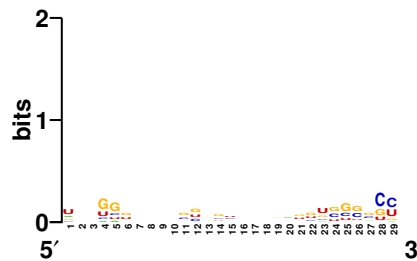

30-mers:

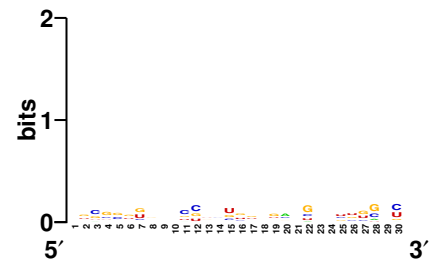



Embryo 60h, library 3:

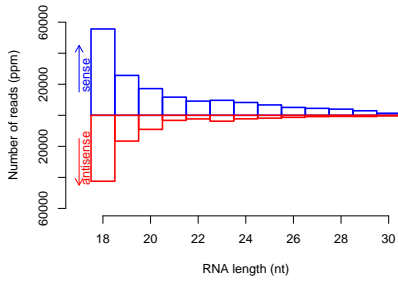

Sense reads:

18-mers:

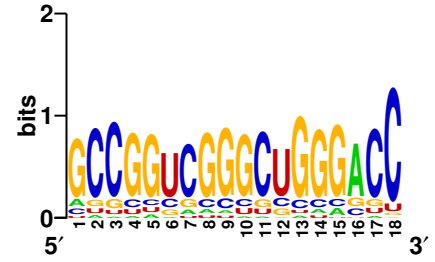

19-mers:

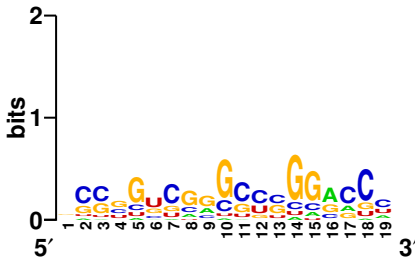

20-mers:

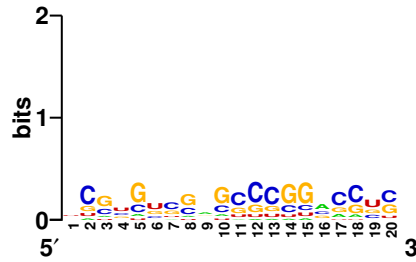

21-mers:

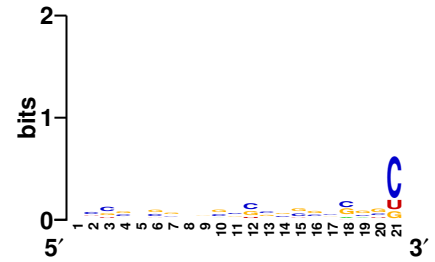

22-mers:

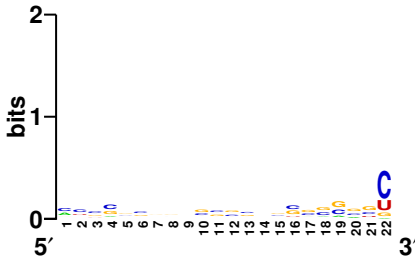

23-mers:

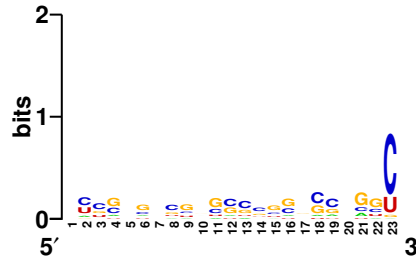

24-mers:

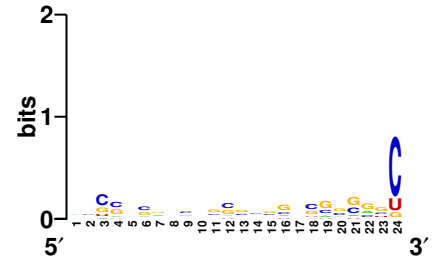

25-mers:

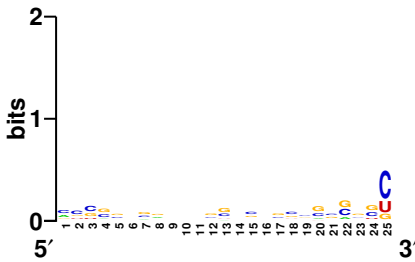

26-mers:

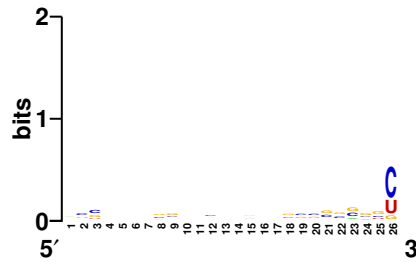

27-mers:

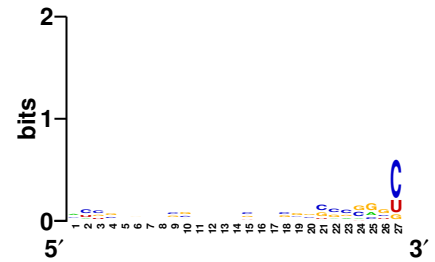

28-mers:

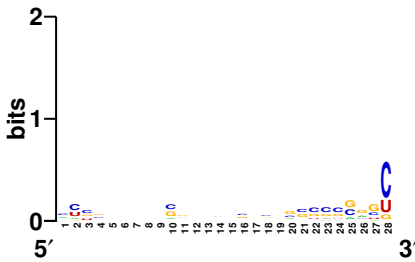

29-mers:

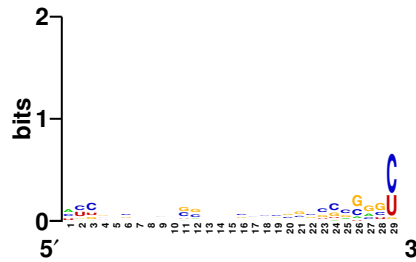

30-mers:

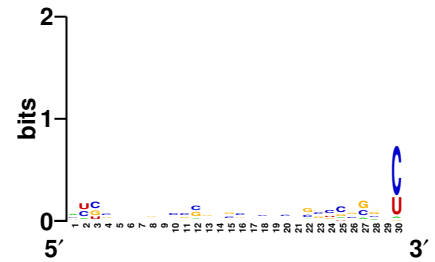



Adult female, library 3:

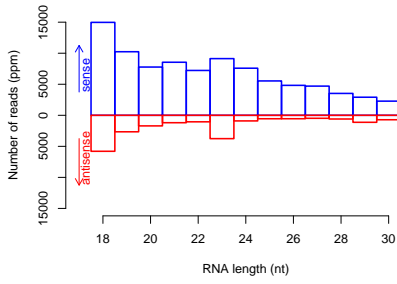

Sense reads:

18-mers:

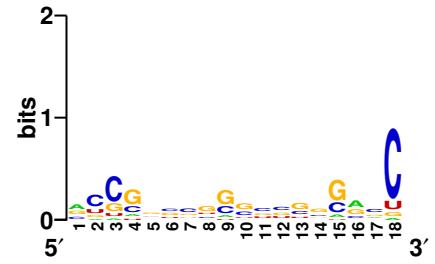

19-mers:

20-mers:

21-mers:

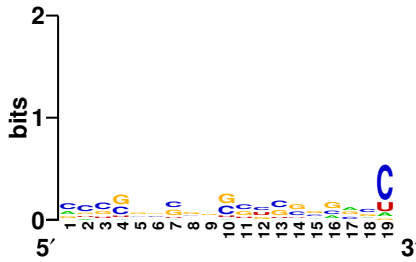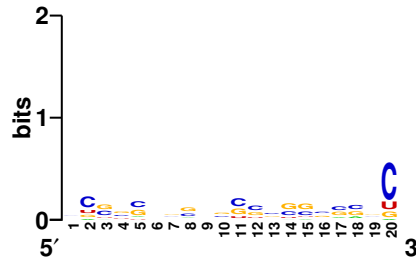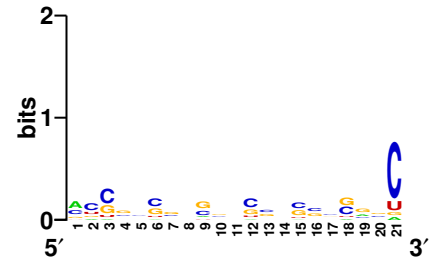

22-mers:

23-mers:

24-mers:

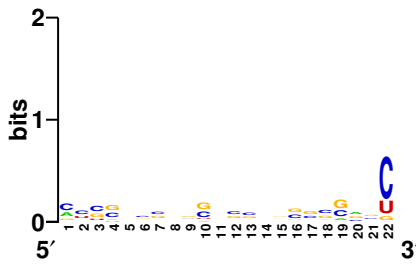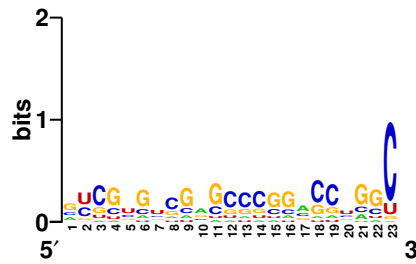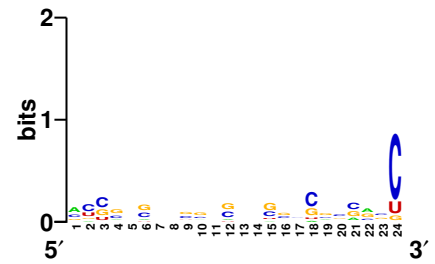

25-mers:

26-mers:

27-mers:

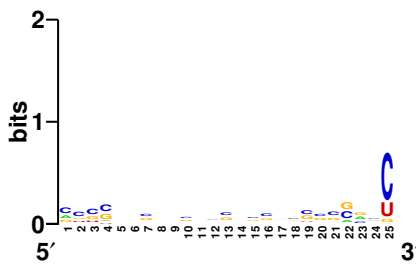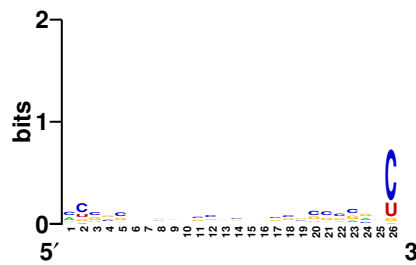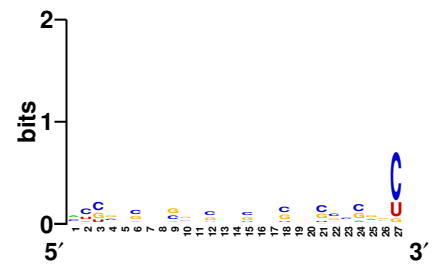

28-mers:

29-mers:

30-mers:

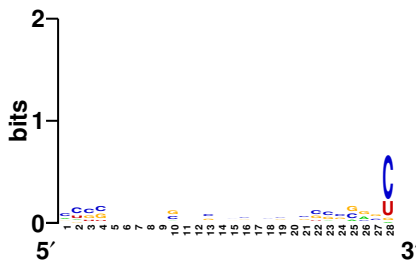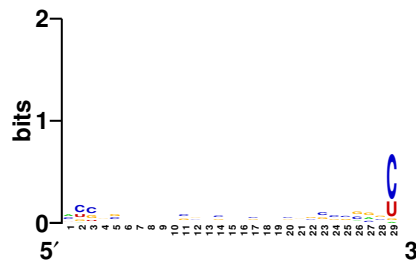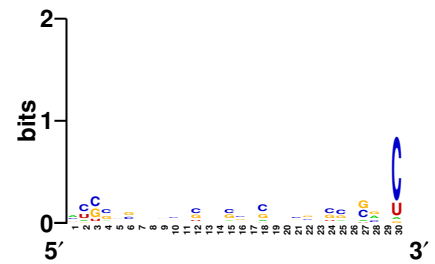







## 4.4 Libraries #4 (3' modified, 5' hydroxyl or polyphosphorylated small RNAs)

Embryo 8h, library 4:

Sense reads:

18-mers:

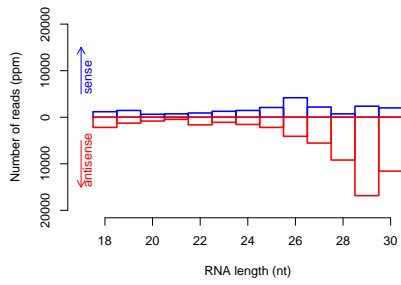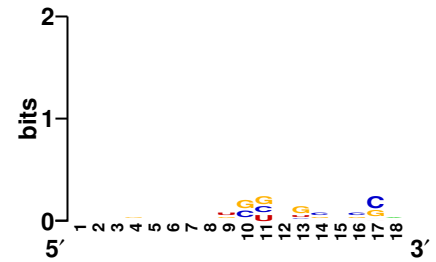

19-mers:

20-mers:

21-mers:

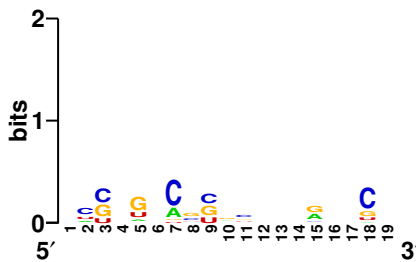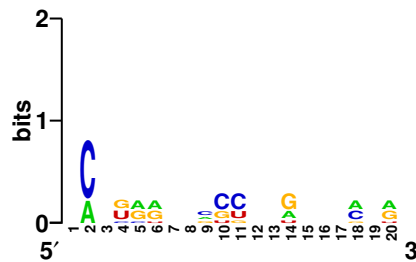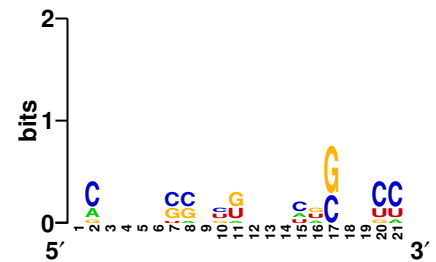

22-mers:

23-mers:

24-mers:

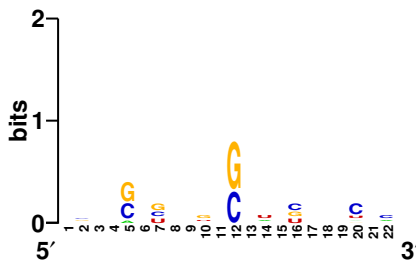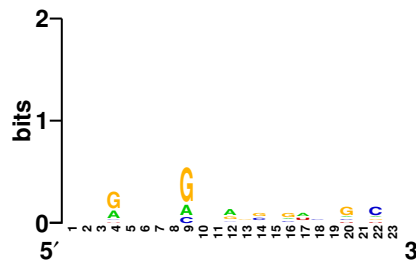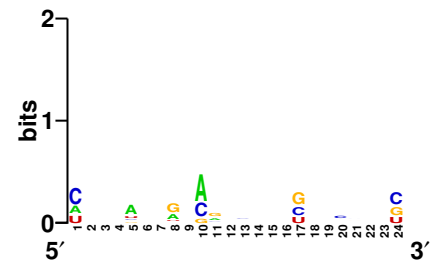

25-mers:

26-mers:

27-mers:

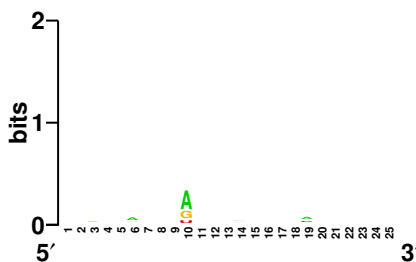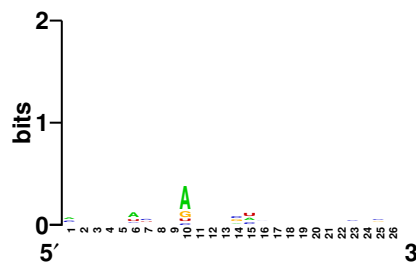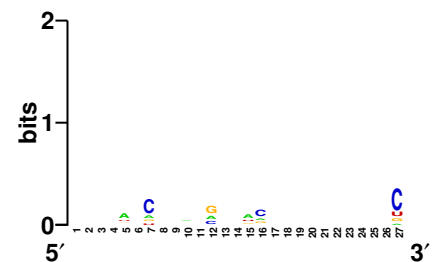

28-mers:

29-mers:

30-mers:

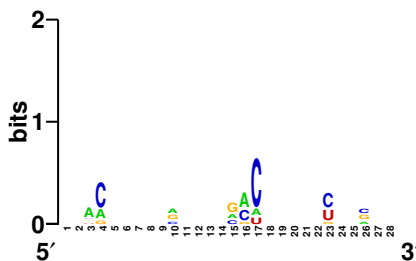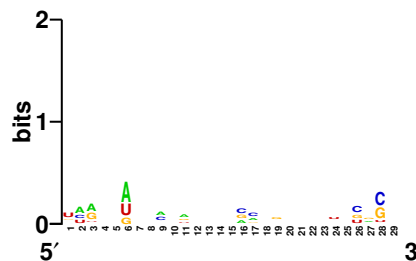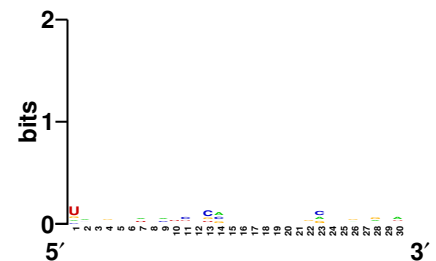

Antisense reads:

18-mers:

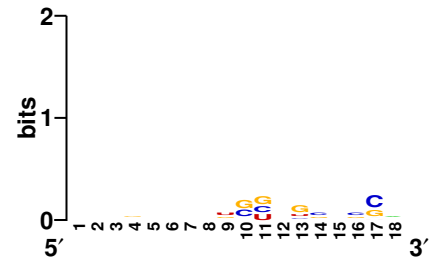

19-mers:

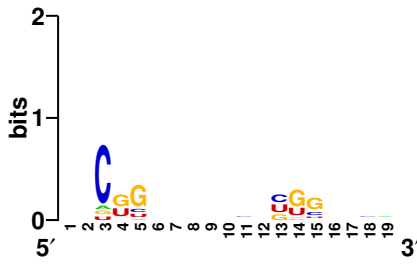

20-mers:

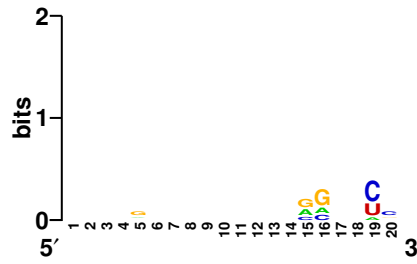

21-mers:

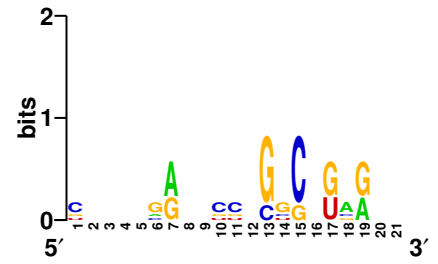

22-mers:

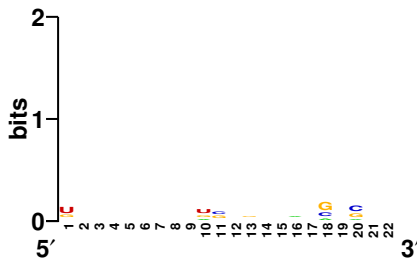

23-mers:

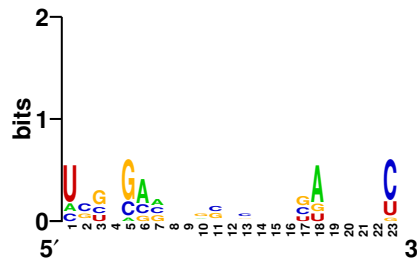

24-mers:

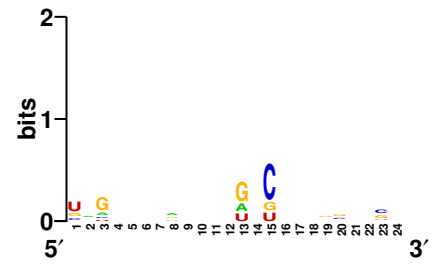

25-mers:

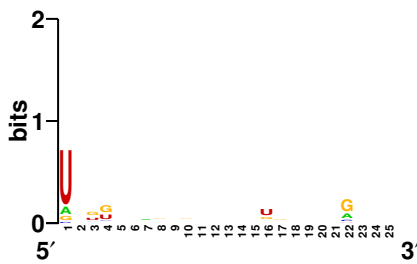

26-mers:

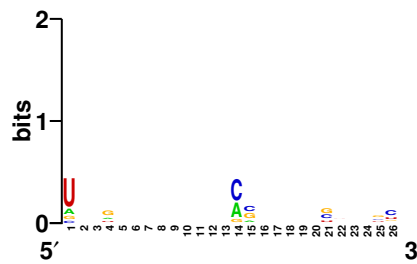

27-mers:

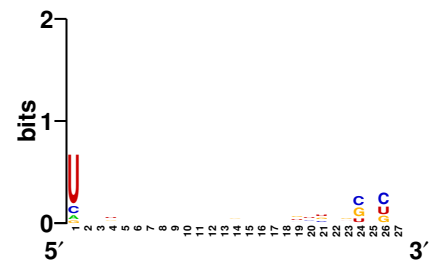

28-mers:

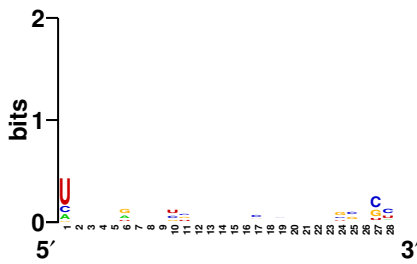

29-mers:

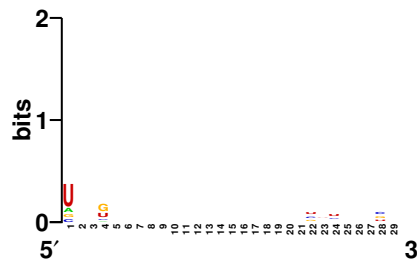

30-mers:

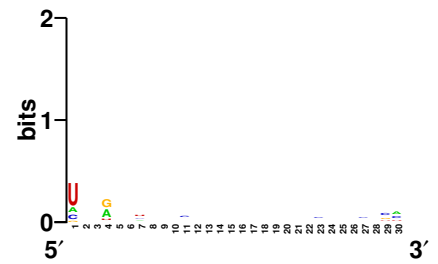





Antisense reads:

18-mers:

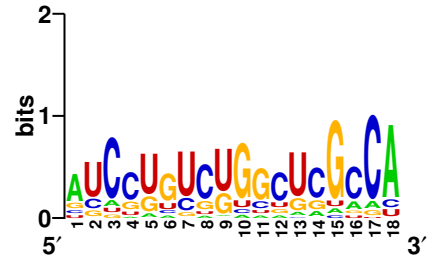

19-mers:

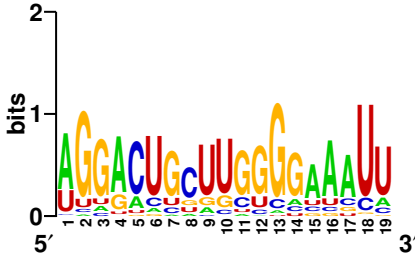

20-mers:

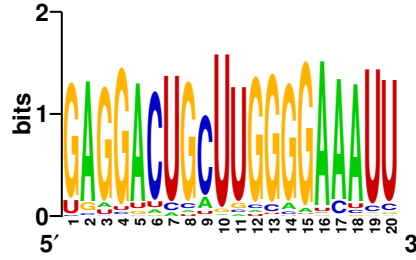

21-mers:

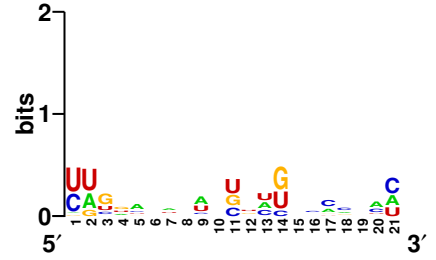

22-mers:

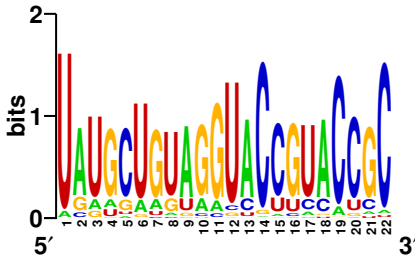

23-mers:

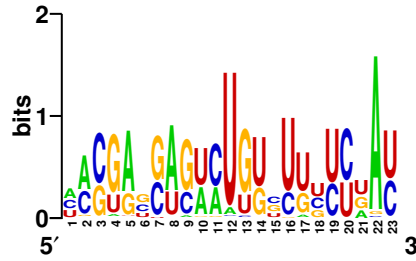

24-mers:

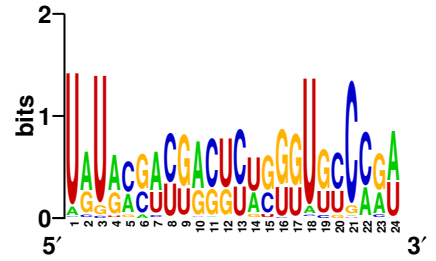

25-mers:

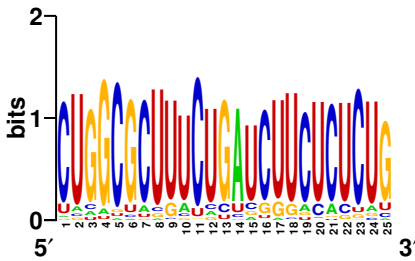

26-mers:

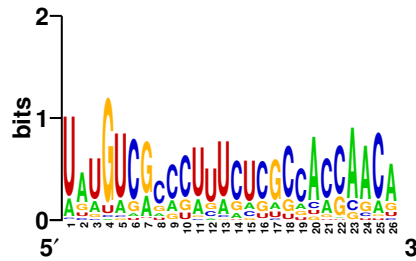

27-mers:

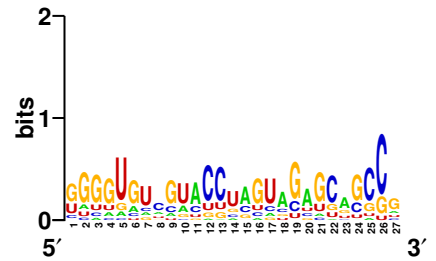

28-mers:

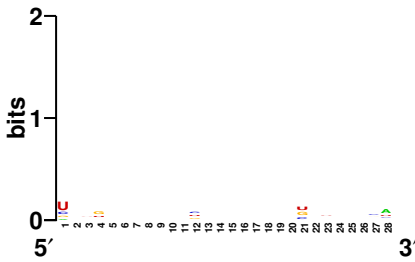

29-mers:

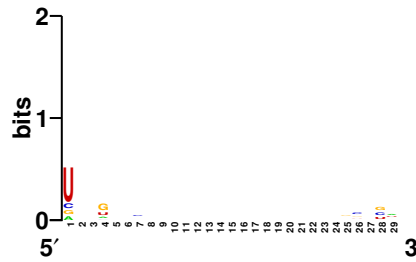

30-mers:

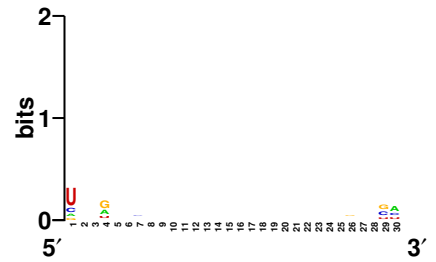

Embryo 36h, library 4:

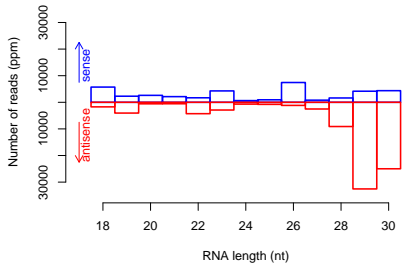

Sense reads:

18-mers:

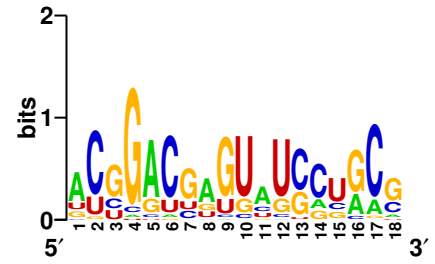

19-mers:

20-mers:

21-mers:

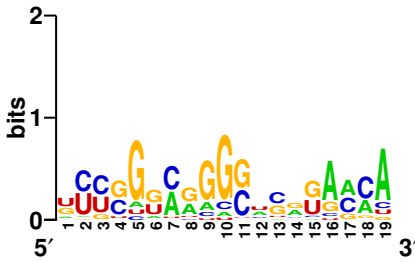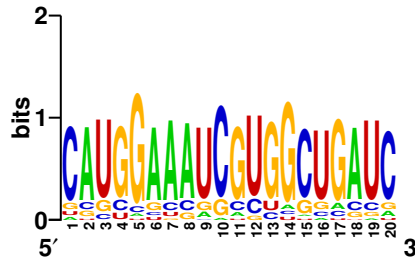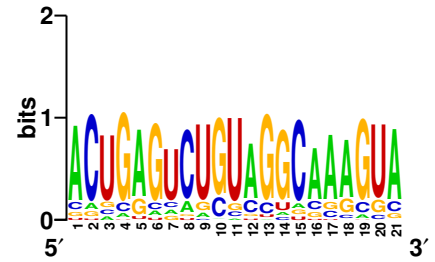

22-mers:

23-mers:

24-mers:

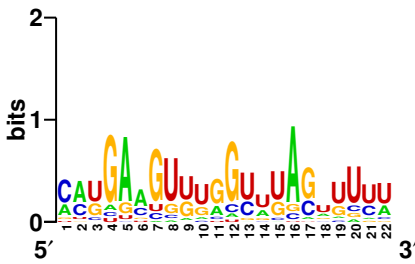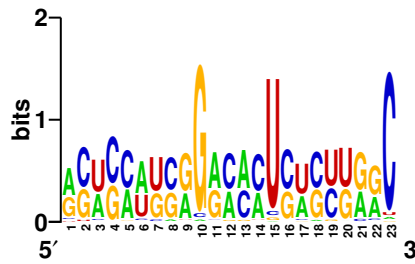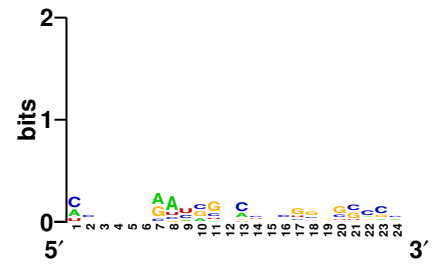

25-mers:

26-mers:

27-mers:

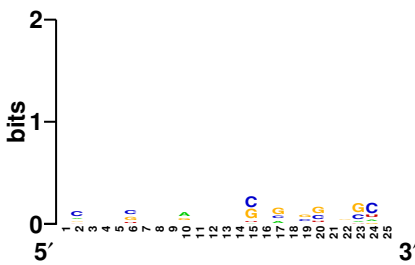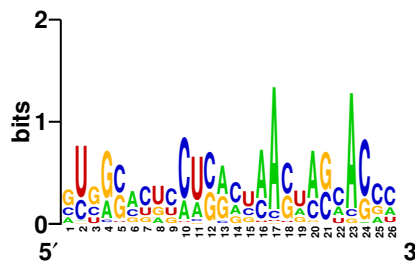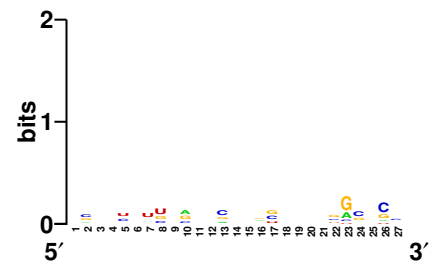

28-mers:

29-mers:

30-mers:

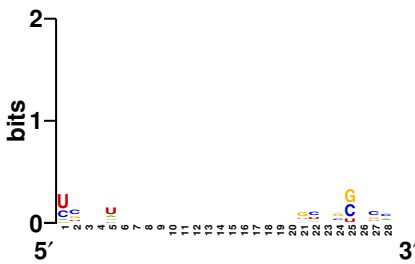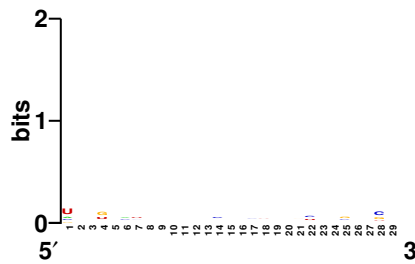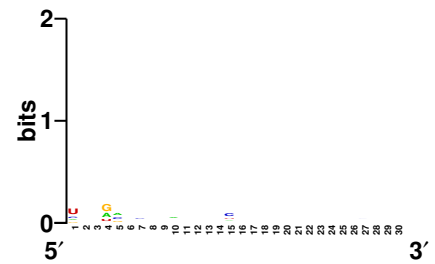

Antisense reads:

18-mers:

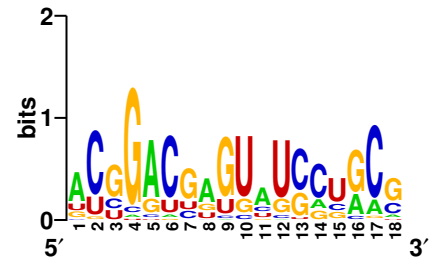

19-mers:

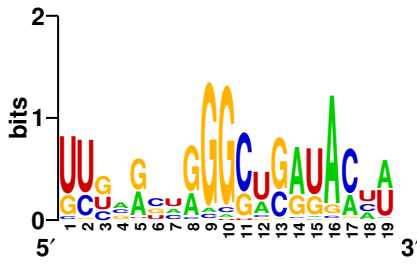

20-mers:

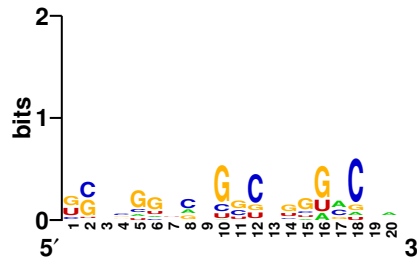

21-mers:

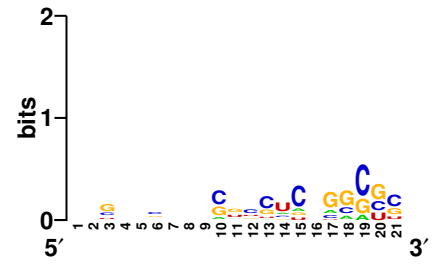

22-mers:

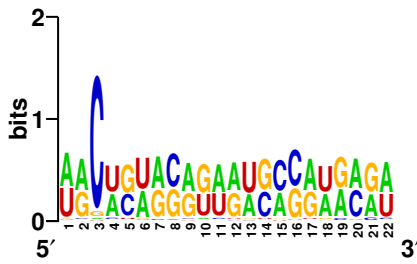

23-mers:

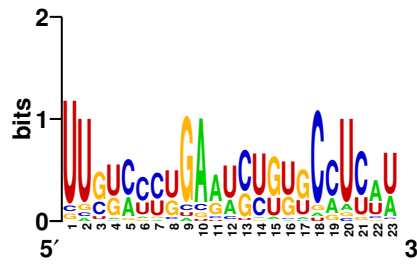

24-mers:

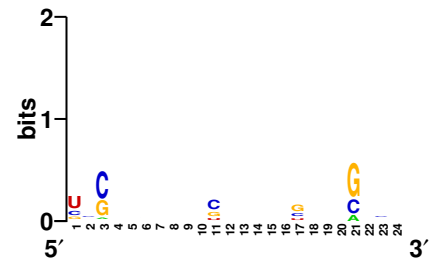

25-mers:

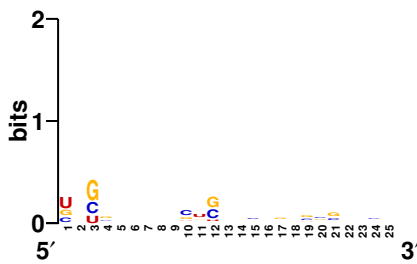

26-mers:

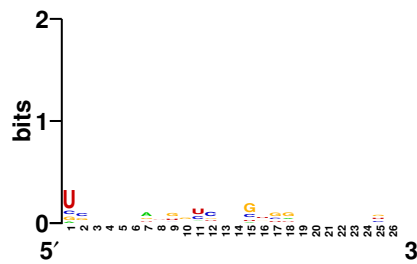

27-mers:

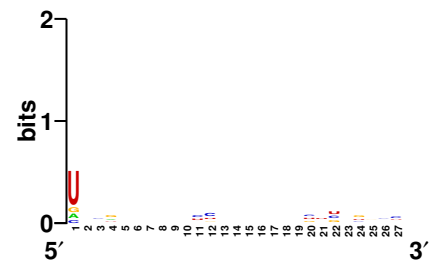

28-mers:

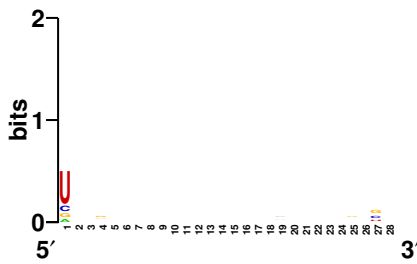

29-mers:

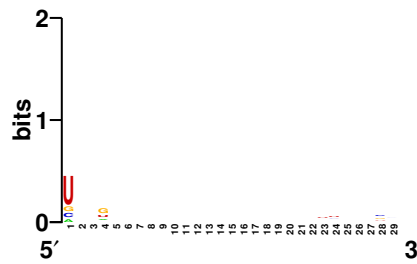

30-mers:

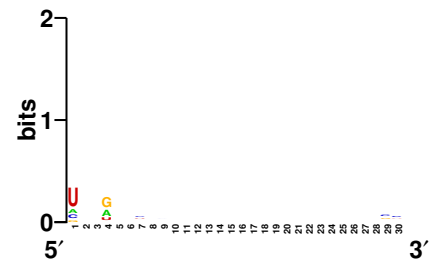

Embryo 60h, library 4:

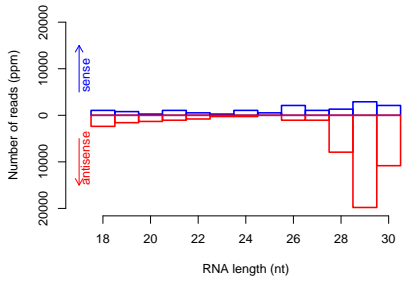

Sense reads:

18-mers:

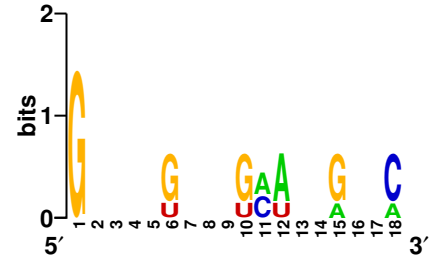

19-mers:

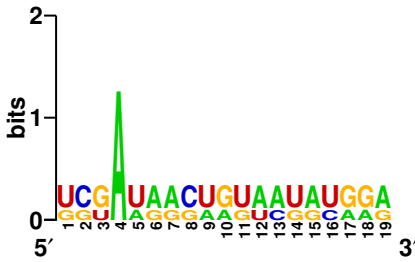

20-mers:



21-mers:

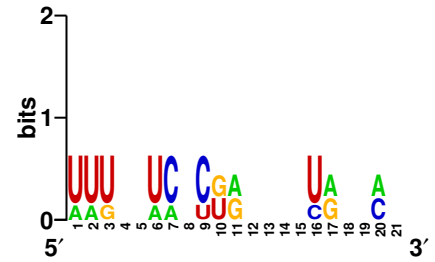

22-mers:

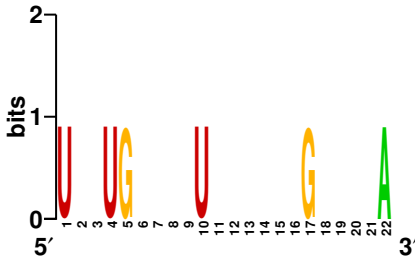

23-mers:

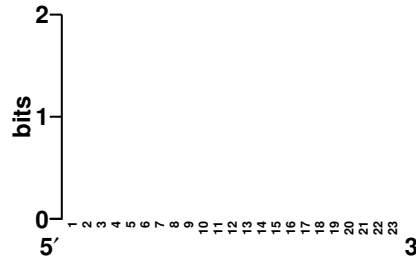

24-mers:

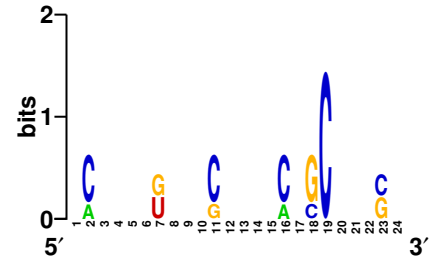

25-mers:

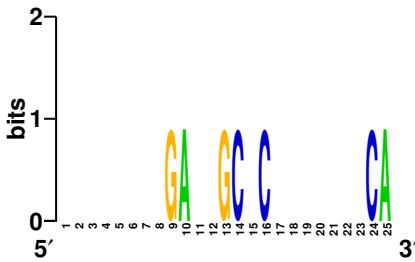

26-mers:

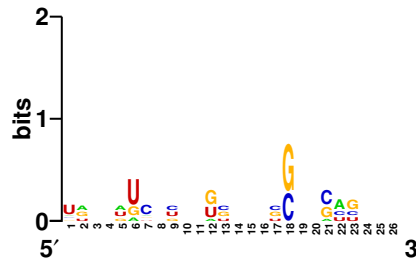

27-mers:

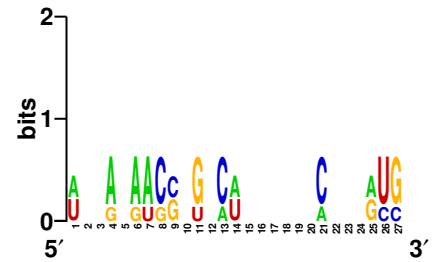

28-mers:

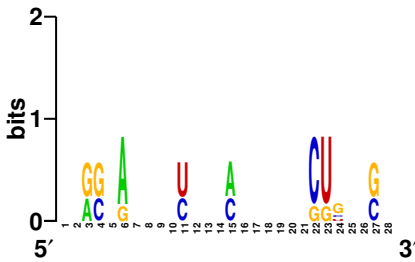

29-mers:

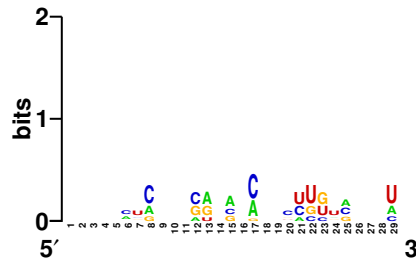

30-mers:

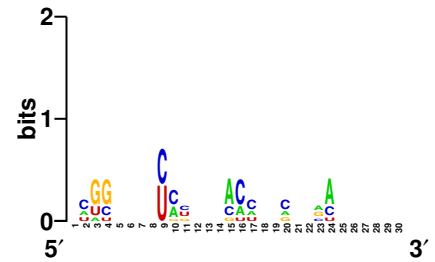

Antisense reads:

18-mers:

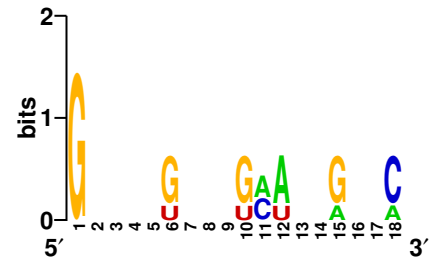

19-mers:

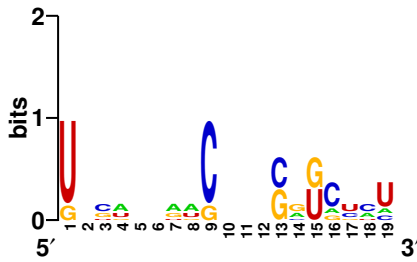

20-mers:

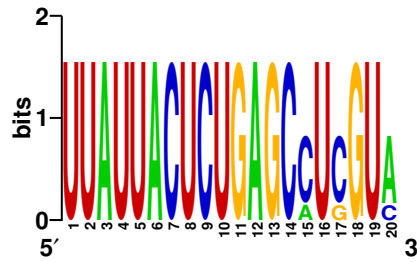

21-mers:

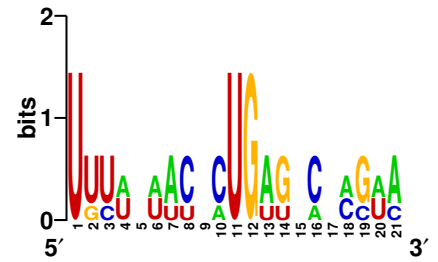

22-mers:

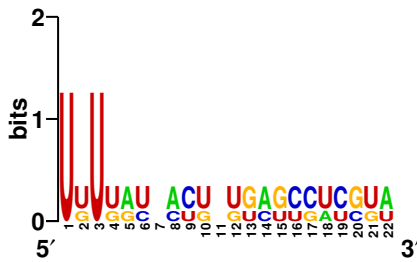

23-mers:



24-mers:



25-mers:

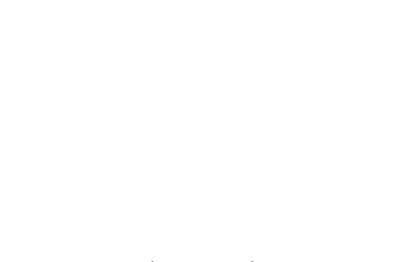

26-mers:

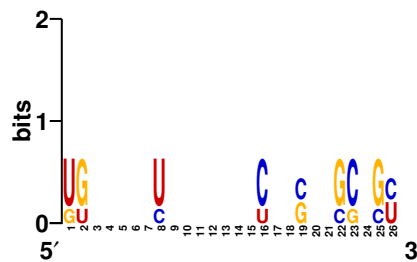

27-mers:

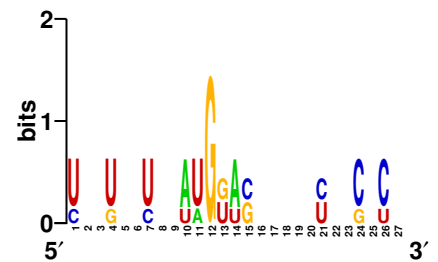

(no read)

28-mers:

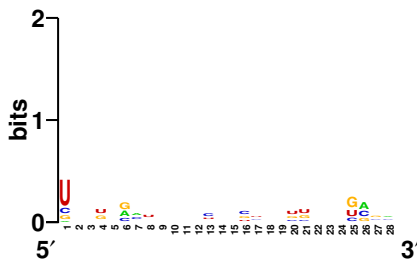

29-mers:

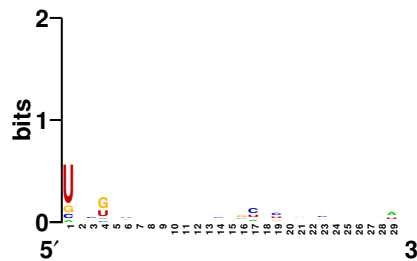

30-mers:

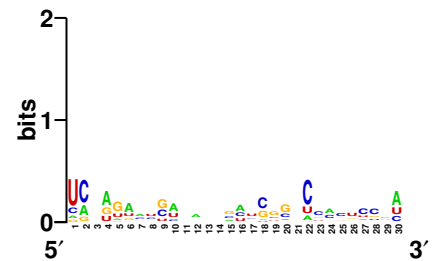

Adult female, library 4:

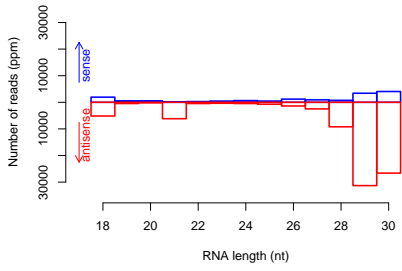

Sense reads:

18-mers:

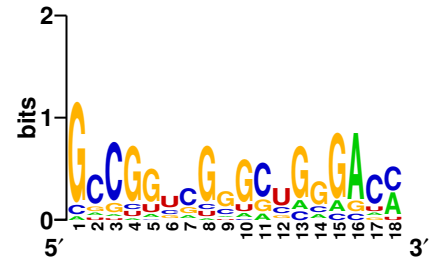

19-mers:

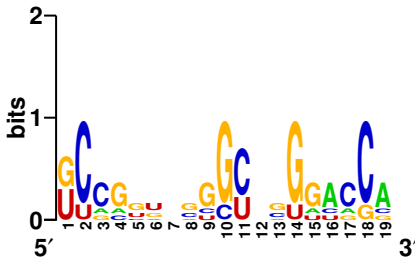

20-mers:

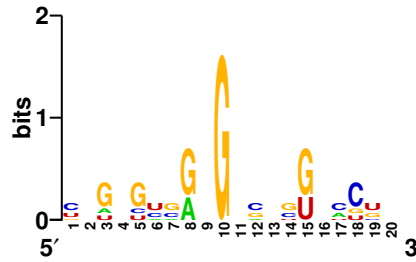

21-mers:

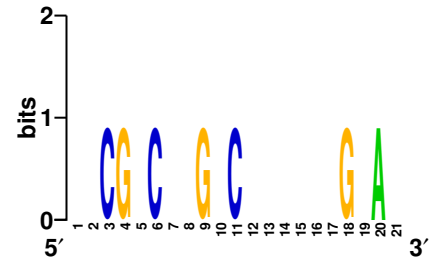

22-mers:

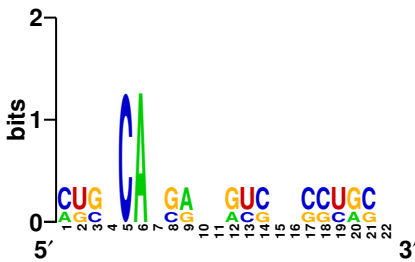

23-mers:

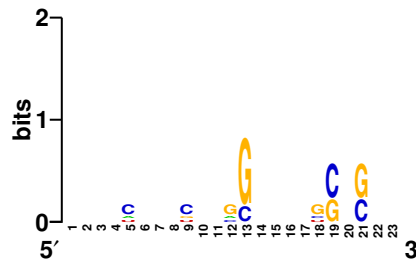

24-mers:

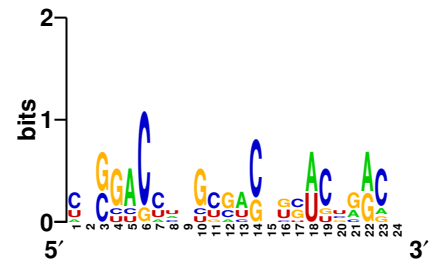

25-mers:

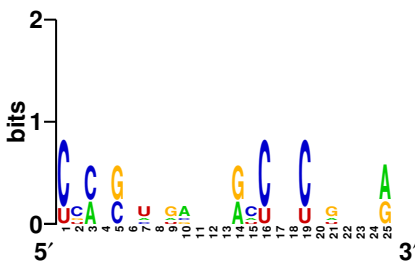

26-mers:

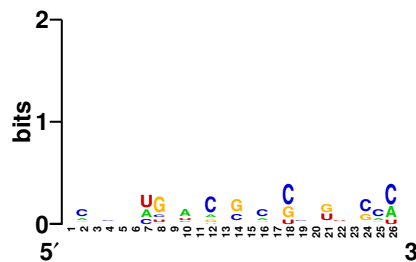

27-mers:

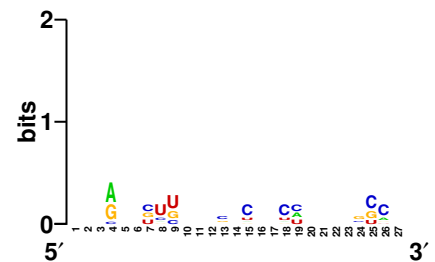

28-mers:

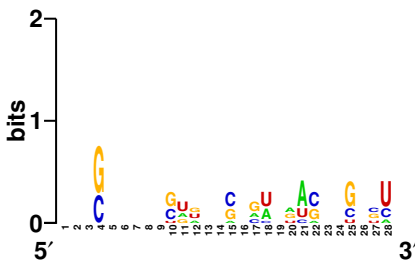

29-mers:

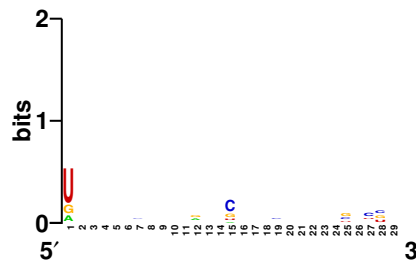

30-mers:

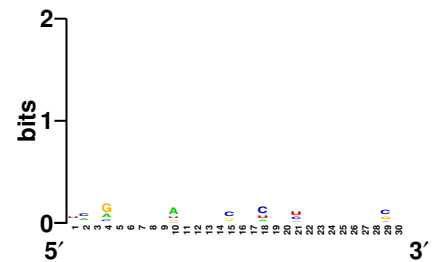

Antisense reads:

18-mers:

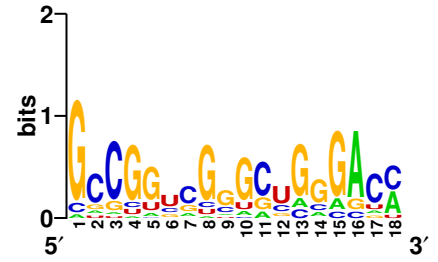

19-mers:

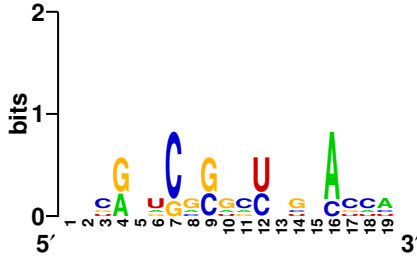

20-mers:

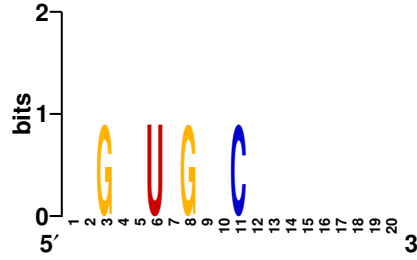

21-mers:

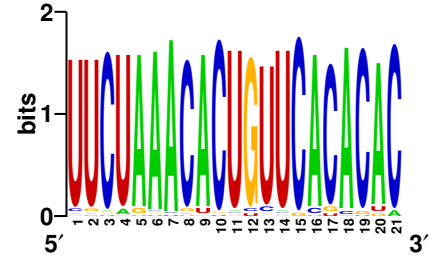

22-mers:

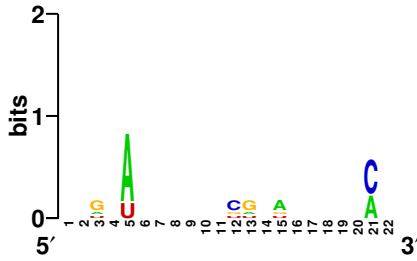

23-mers:

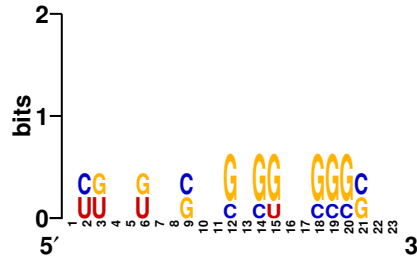

24-mers:

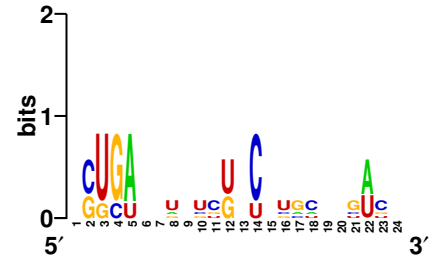

25-mers:

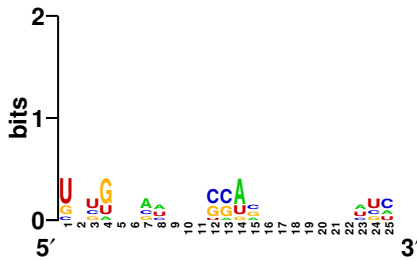

26-mers:

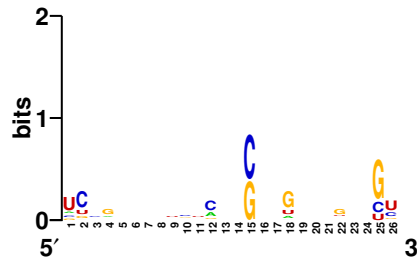

27-mers:

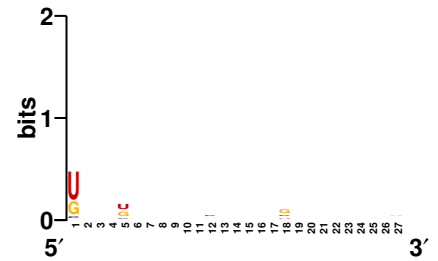

28-mers:

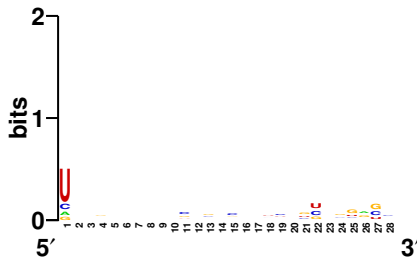

29-mers:

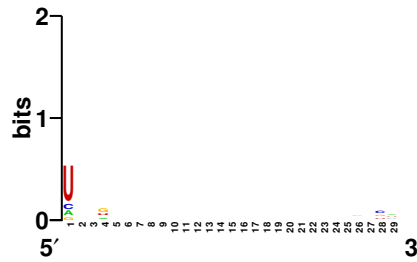

30-mers:

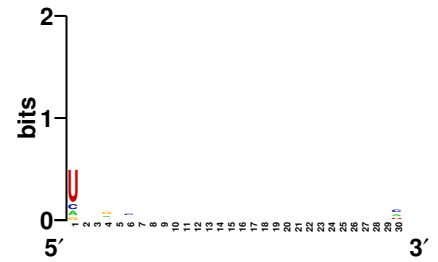



Adult male, library 4:

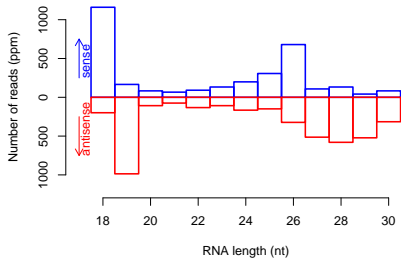

Sense reads:

18-mers:

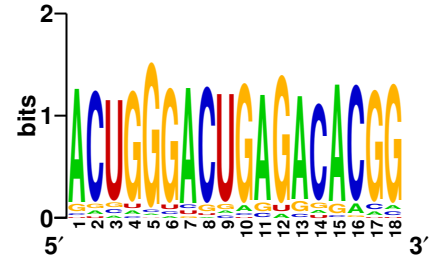

19-mers:

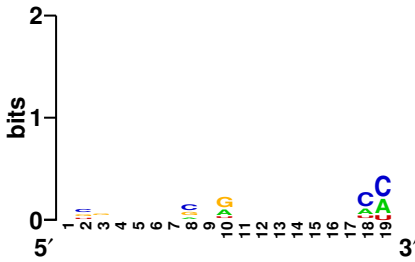

20-mers:

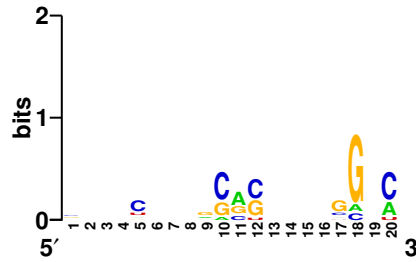

21-mers:

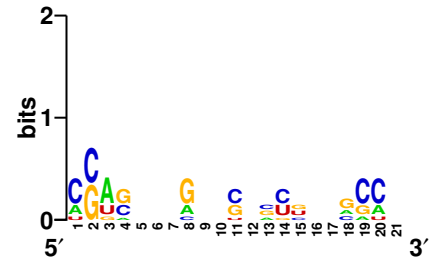

22-mers:

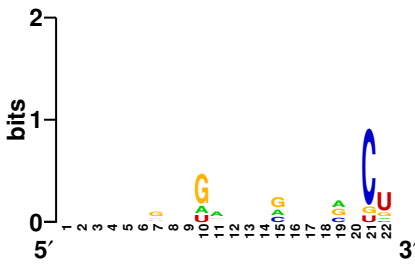

23-mers:

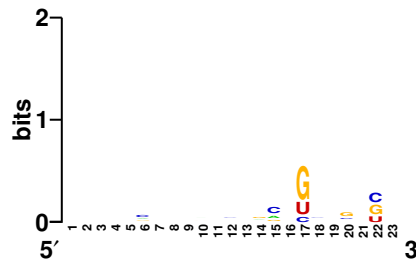

24-mers:

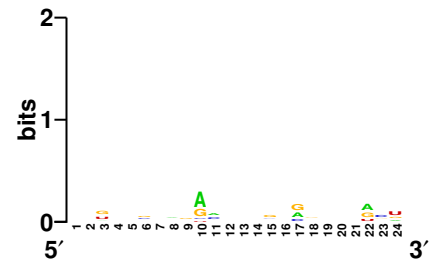

25-mers:

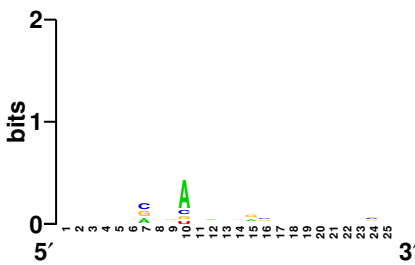

26-mers:

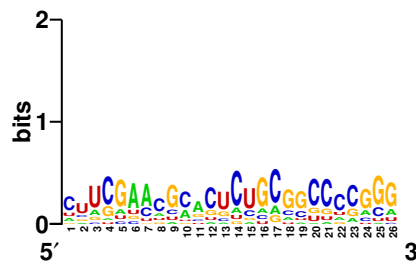

27-mers:

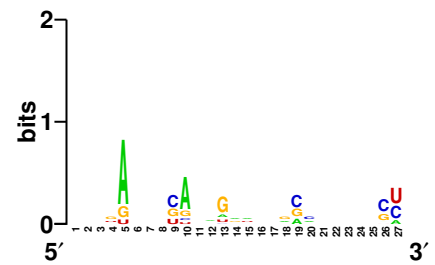

28-mers:

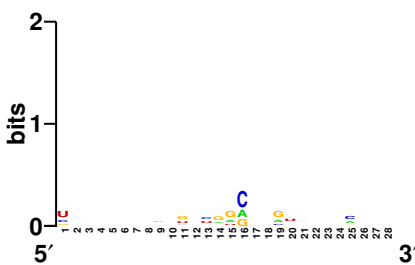

29-mers:

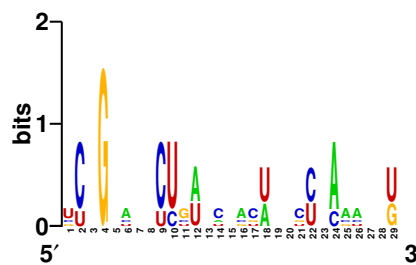

30-mers:

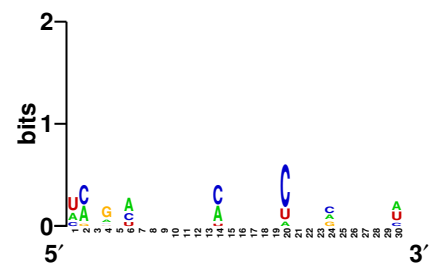

Antisense reads:

18-mers:

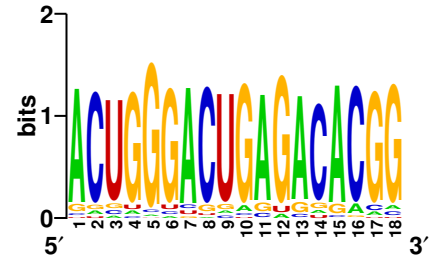

19-mers:

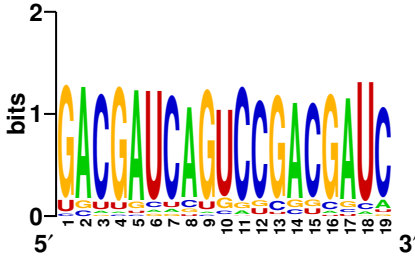

20-mers:

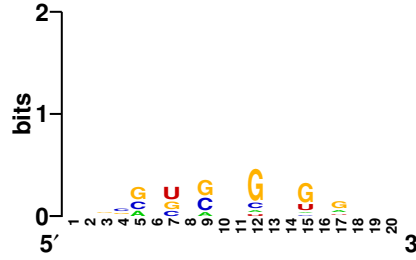

21-mers:

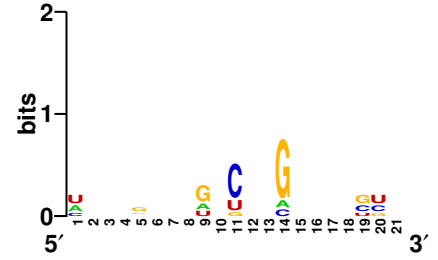

22-mers:

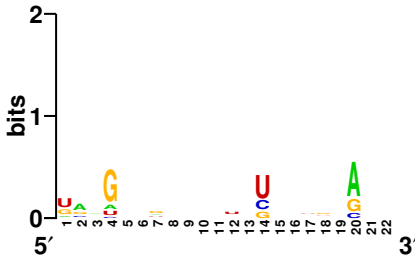

23-mers:

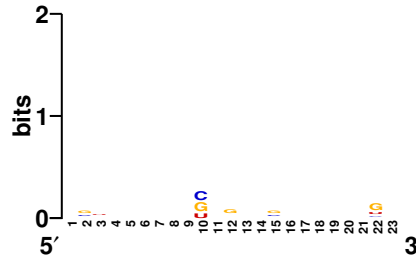

24-mers:

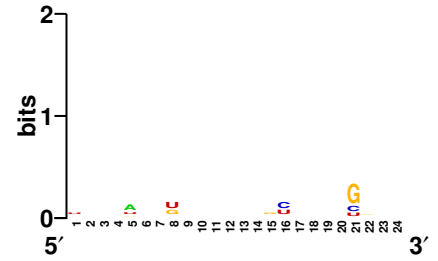

25-mers:

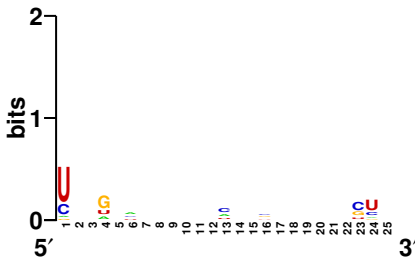

26-mers:

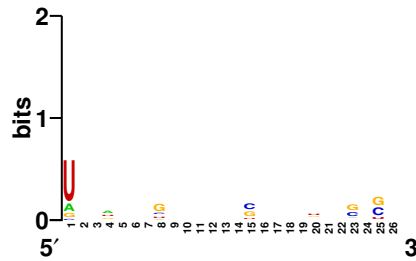

27-mers:

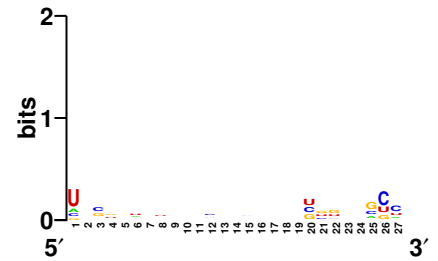

28-mers:

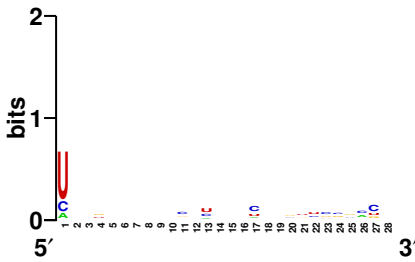

29-mers:

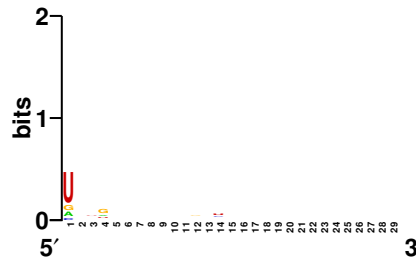

30-mers:

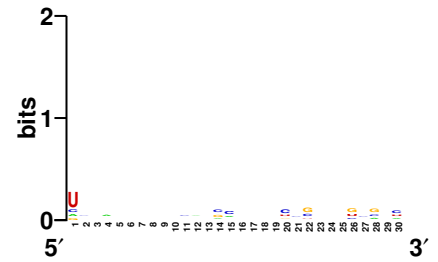

## 5 Extragenomic and extratranscriptomic reads

### 5.1 Libraries #1 (total 5' monophosphorylated small RNAs)

Embryo 8h, library 1:

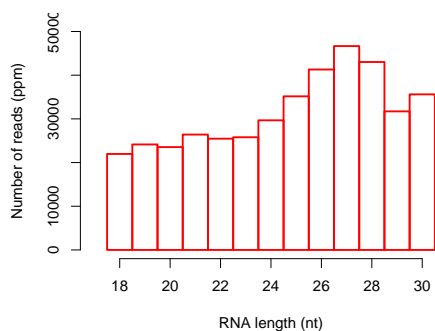

18-mers:

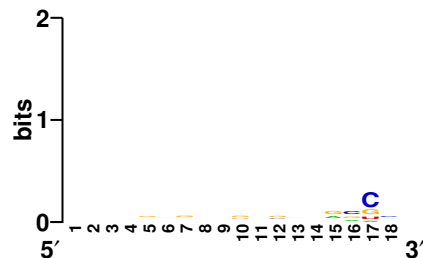

19-mers:

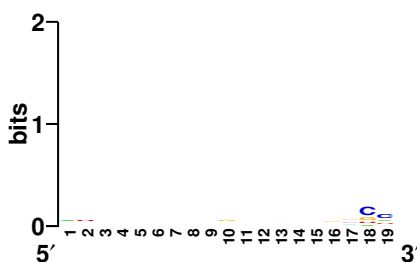

20-mers:

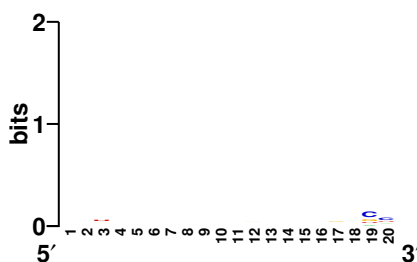

21-mers:

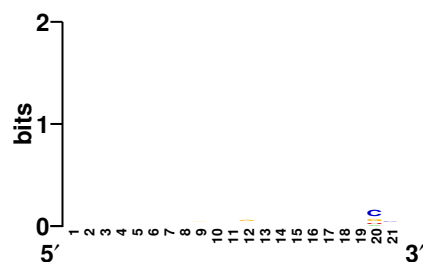

22-mers:

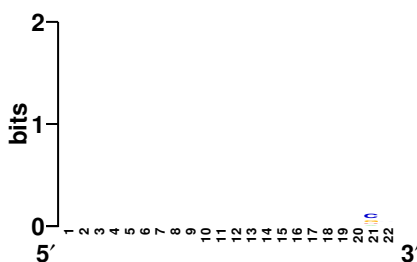

23-mers:

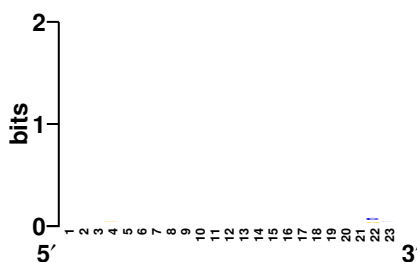

24-mers:

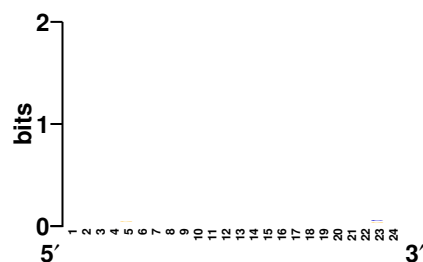

25-mers:

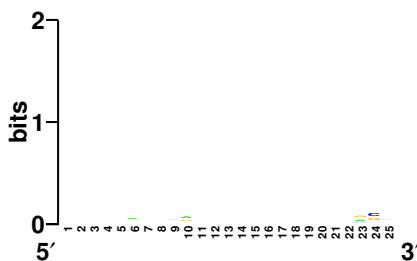

26-mers:

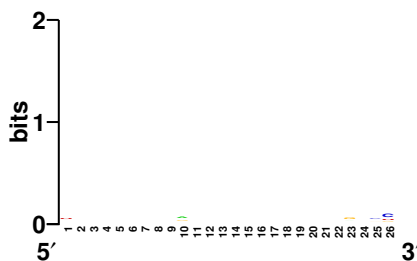

27-mers:

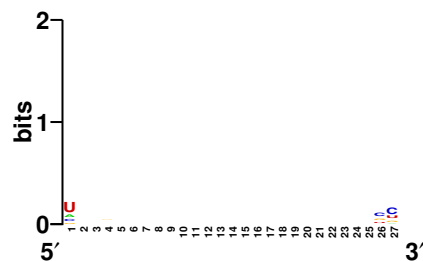

28-mers:

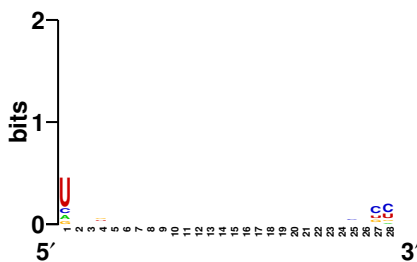

29-mers:

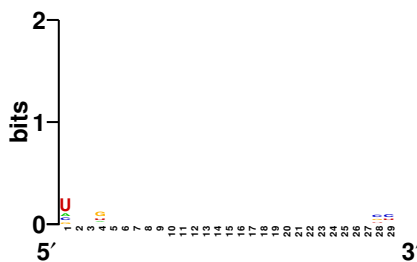

30-mers:

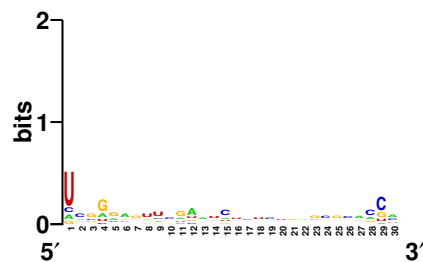

Embryo 15h, library 1:

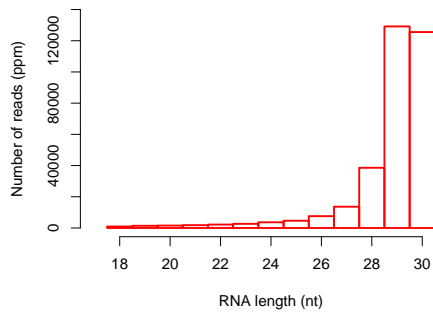

19-mers:

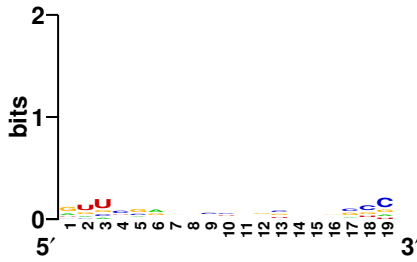

20-mers:

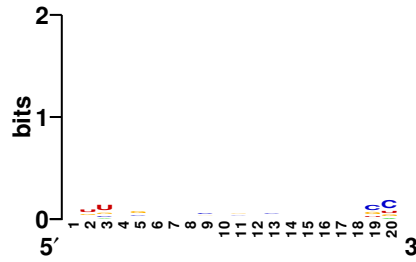

18-mers:

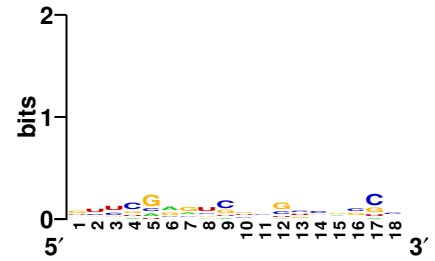

21-mers:

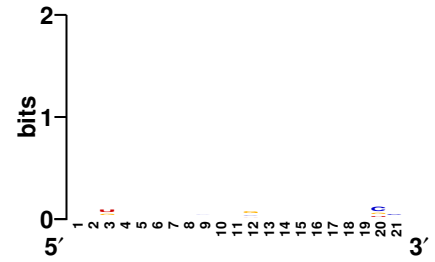

22-mers:

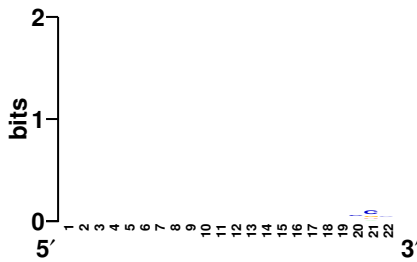

23-mers:

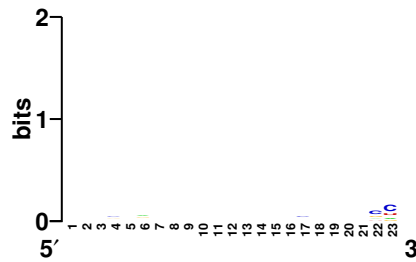

24-mers:

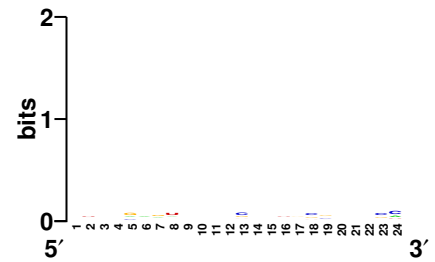

25-mers:

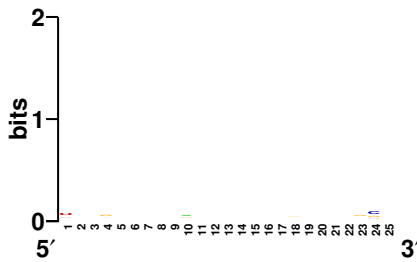

26-mers:

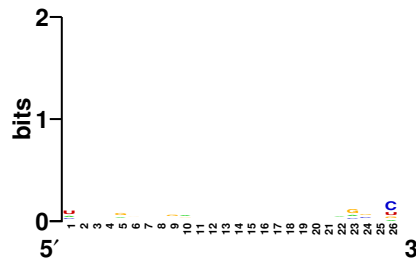

27-mers:

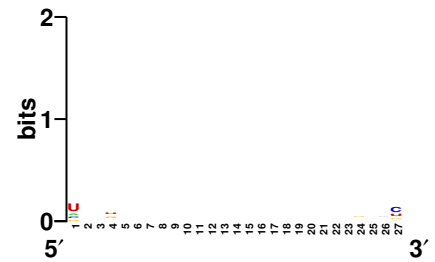

28-mers:

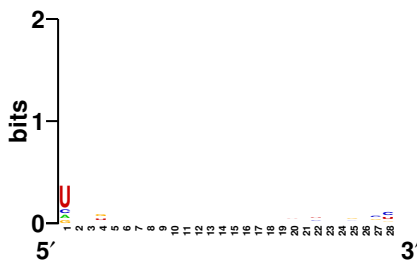

29-mers:

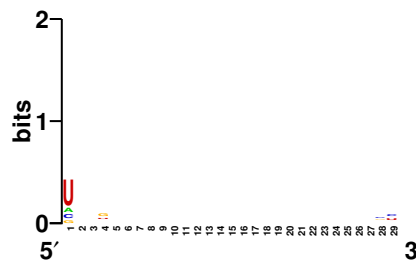

30-mers:

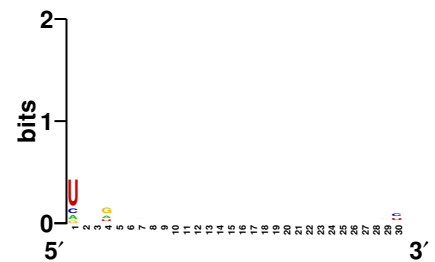

Embryo 36h, library 1:

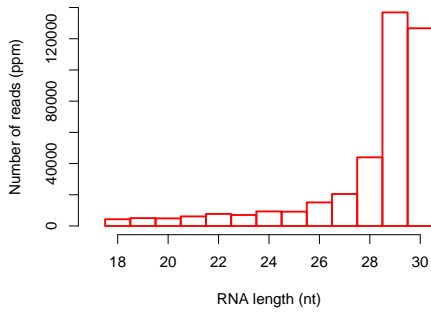

18-mers:

18-mers:

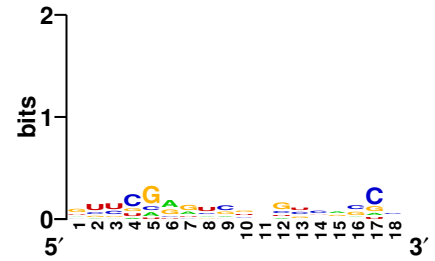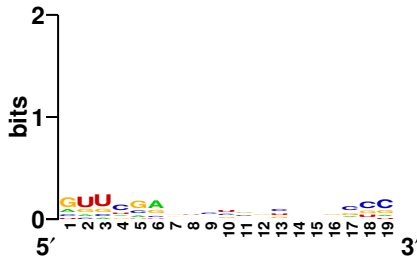

20-mers:

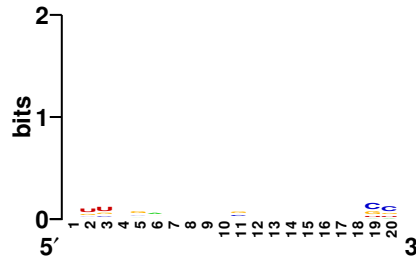

21-mers:

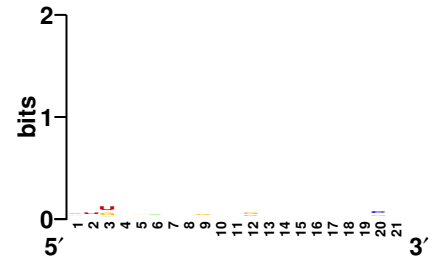

22-mers:

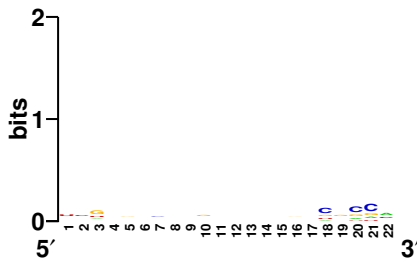

23-mers:

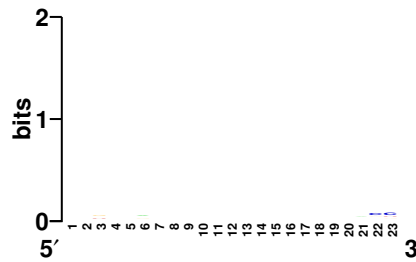

24-mers:

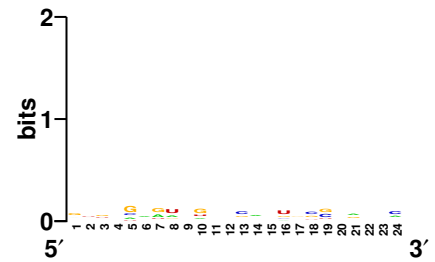

25-mers:

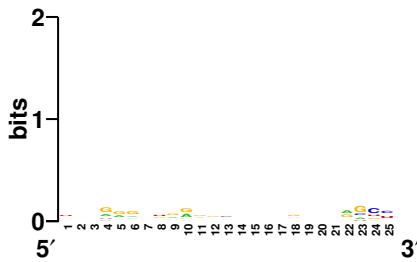

26-mers:

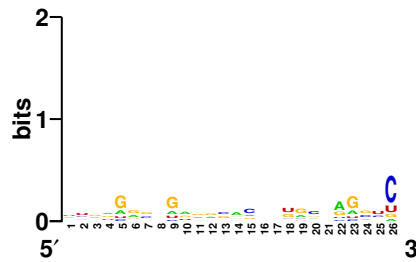

27-mers:

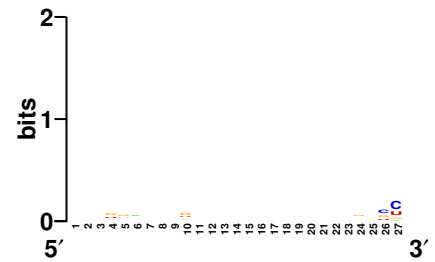

28-mers:

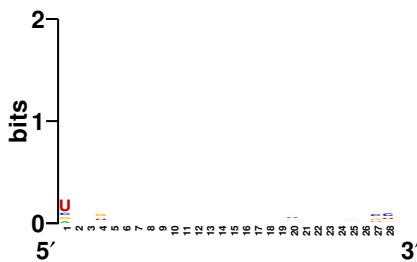

29-mers:

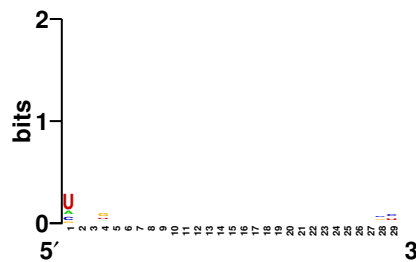

30-mers:

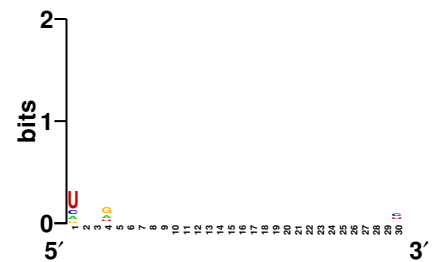

Embryo 60h, library 1:

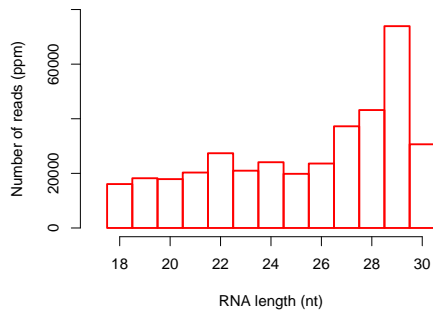

19-mers:

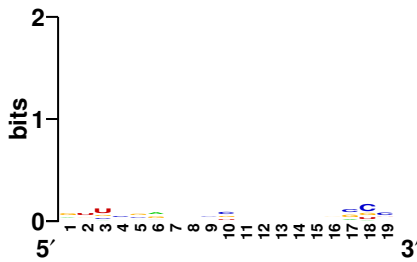

20-mers:

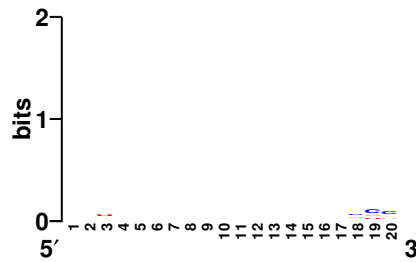

18-mers:

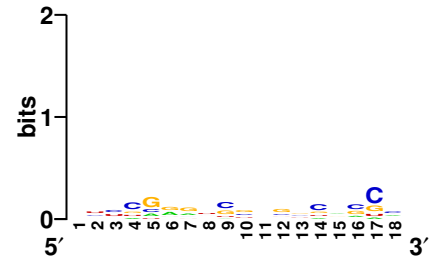

21-mers:

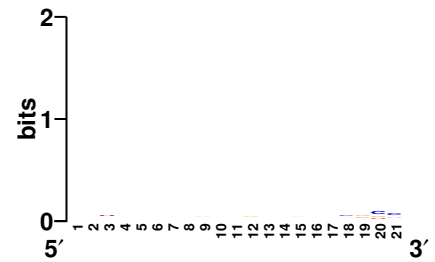

22-mers:

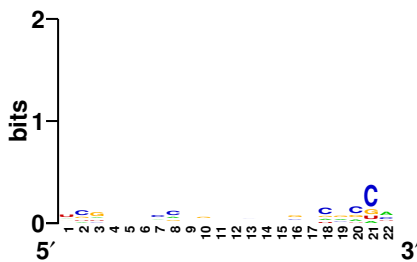

23-mers:

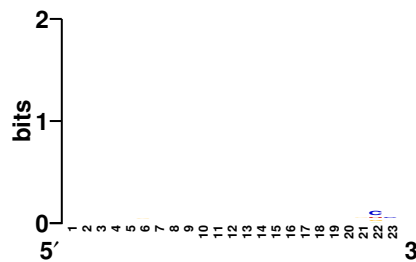

24-mers:

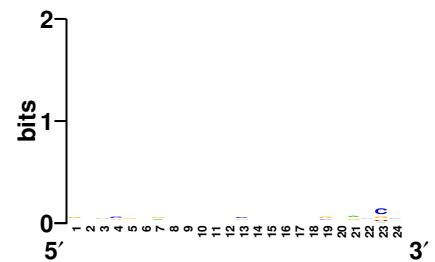

25-mers:

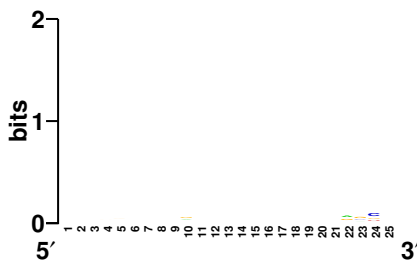

26-mers:

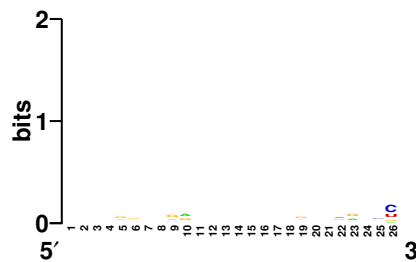

27-mers:

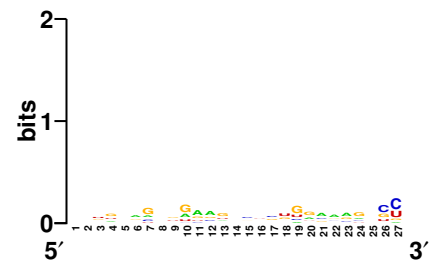

28-mers:

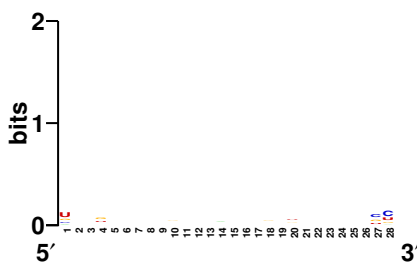

29-mers:

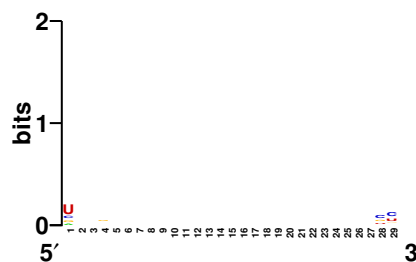

30-mers:

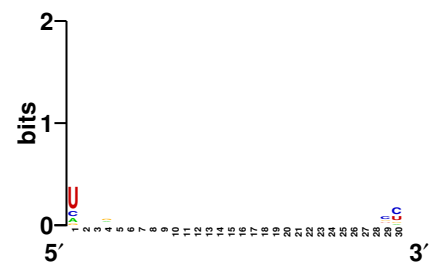

Adult female, library 1:

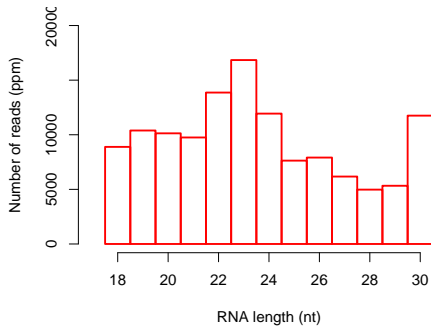

19-mers:

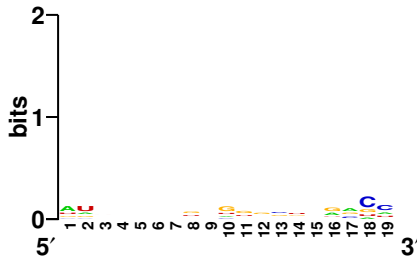

20-mers:

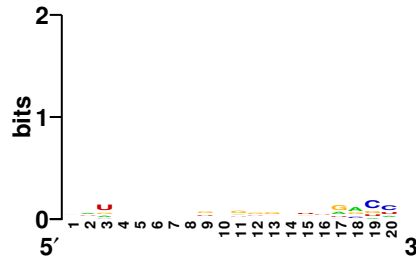

18-mers:

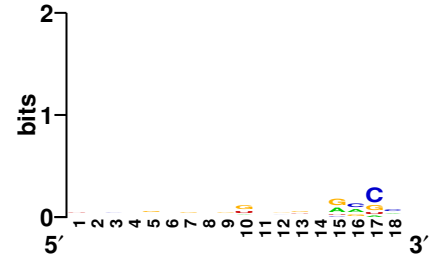

21-mers:

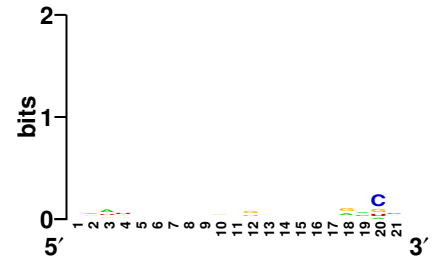

22-mers:

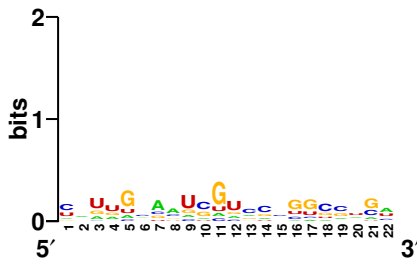

23-mers:

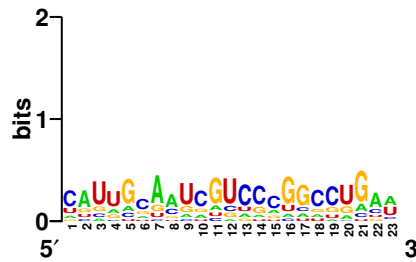

24-mers:

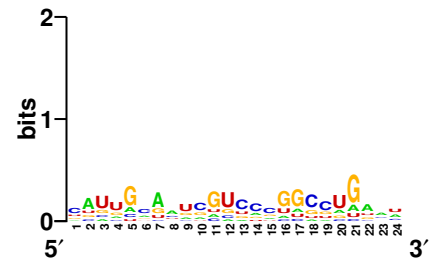

25-mers:

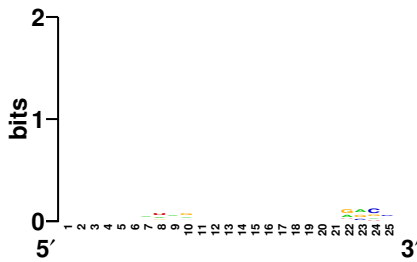

26-mers:

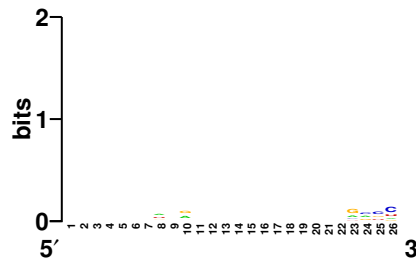

27-mers:

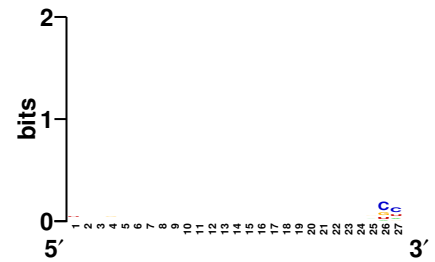

28-mers:

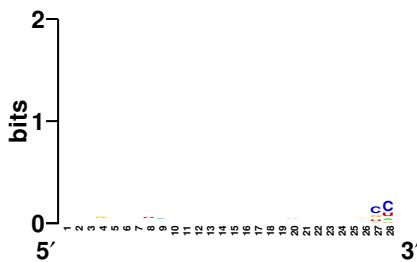

29-mers:

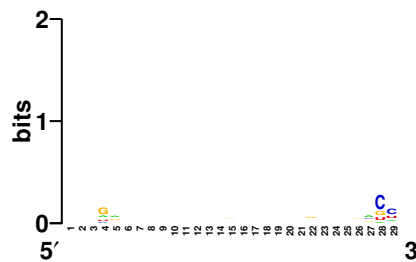

30-mers:

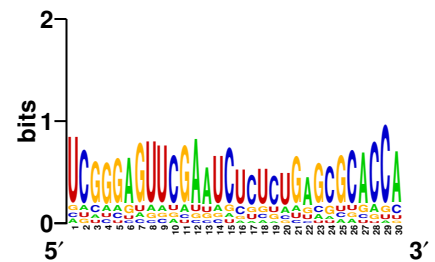





## 5.2 Libraries #2 (3' modified, 5' monophosphorylated small RNAs)

Embryo 8h, library 2:

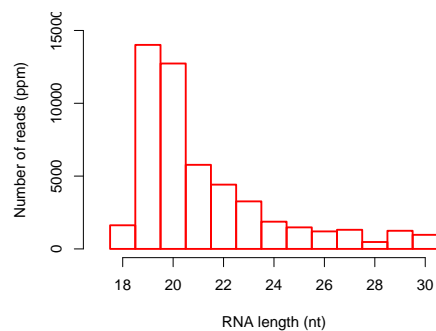

18-mers:

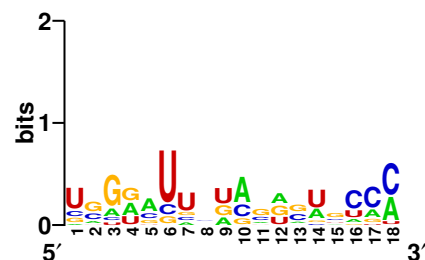

19-mers:

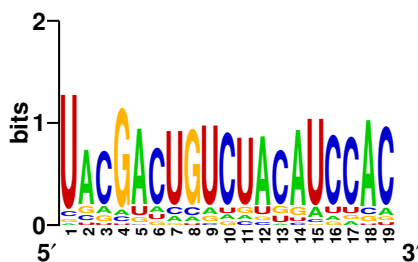

20-mers:

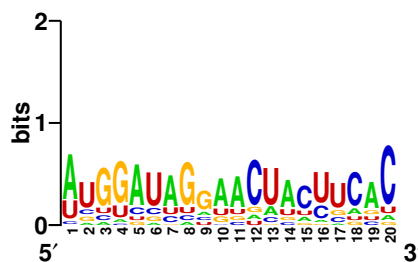

21-mers:

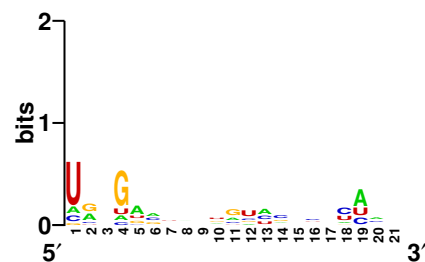

22-mers:

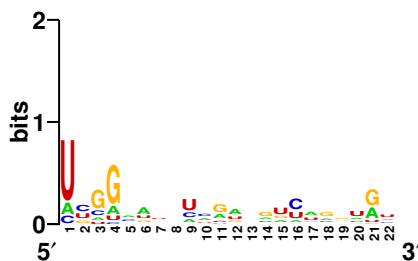

23-mers:

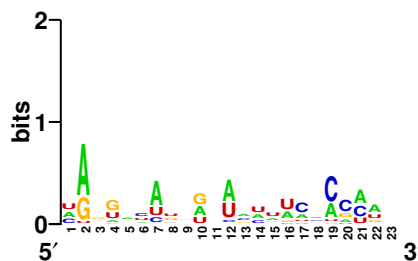

24-mers:

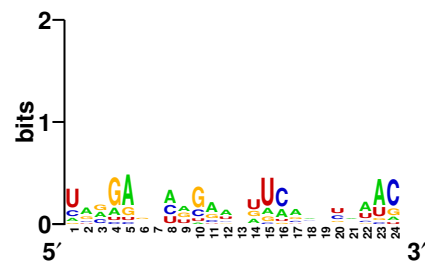

25-mers:

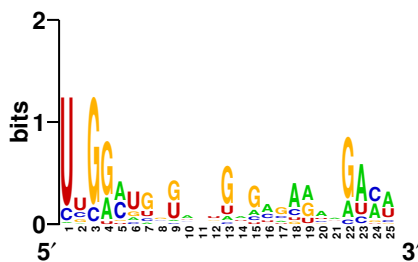

26-mers:

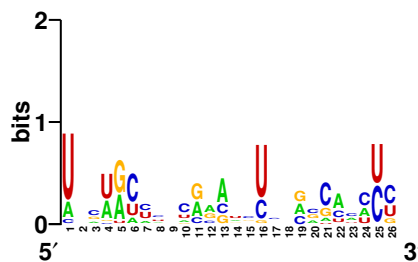

27-mers:

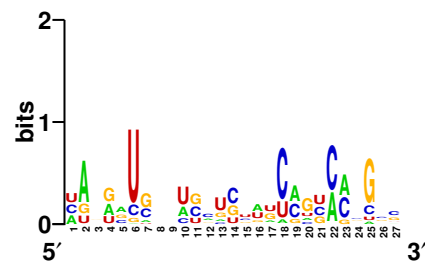

28-mers:

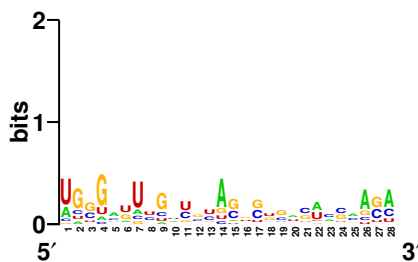

29-mers:

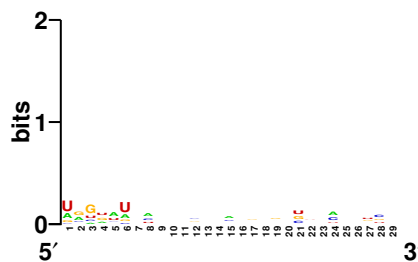

30-mers:

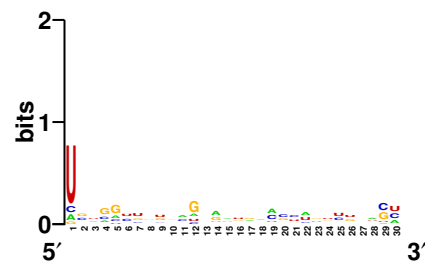

Embryo 15h, library 2:

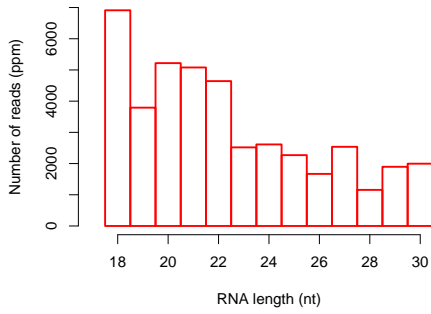

19-mers:

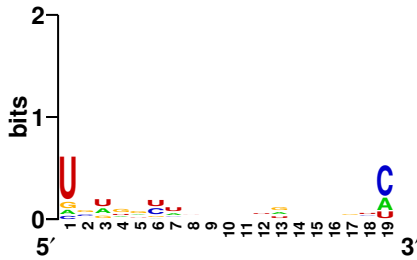

20-mers:

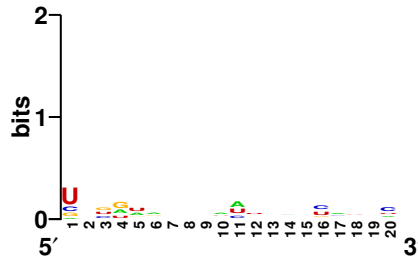

18-mers:

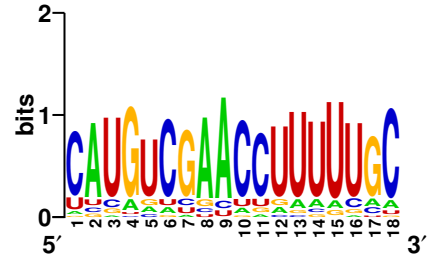

21-mers:

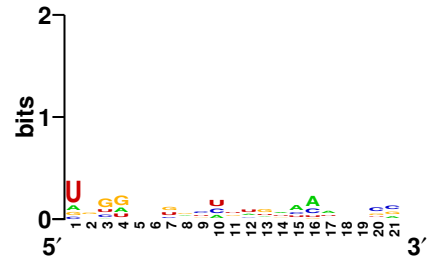

22-mers:

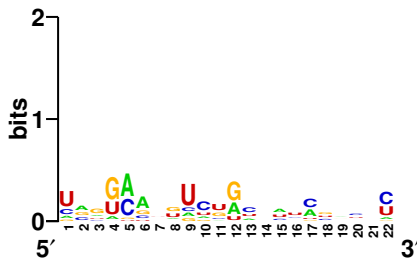

23-mers:

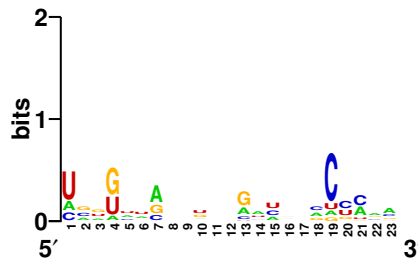

24-mers:

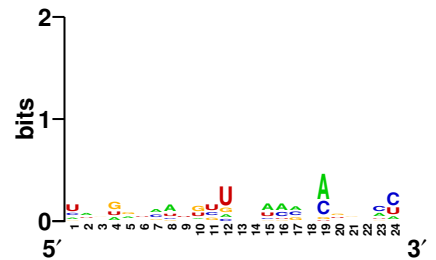

25-mers:

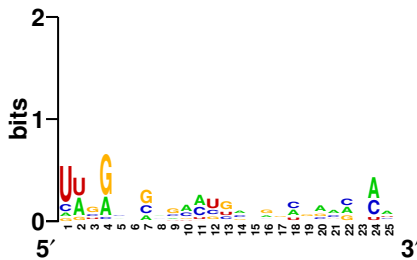

26-mers:

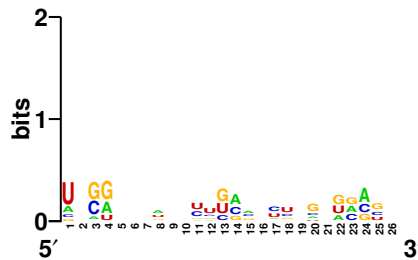

27-mers:

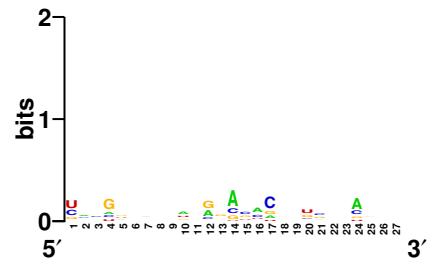

28-mers:

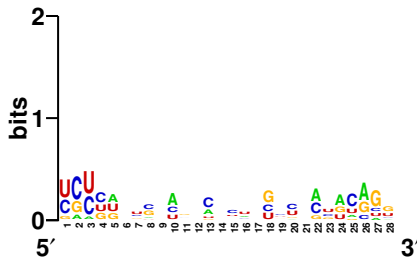

29-mers:

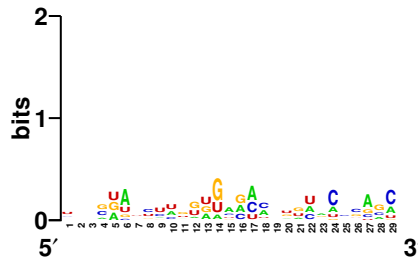

30-mers:

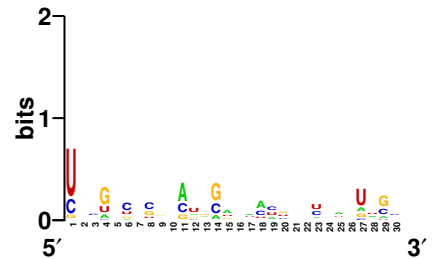





Adult female, library 2:

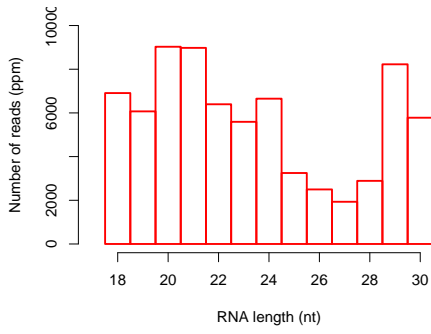

19-mers:

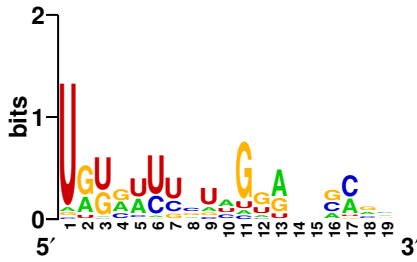

20-mers:

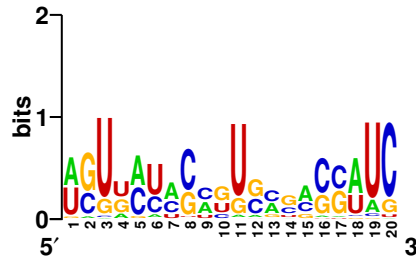

18-mers:

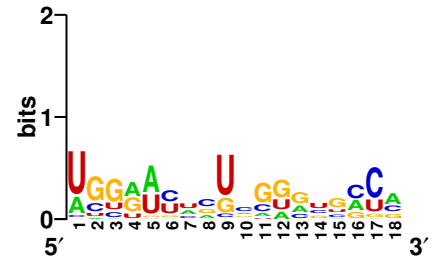

21-mers:

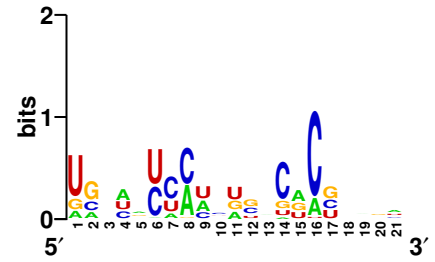

22-mers:

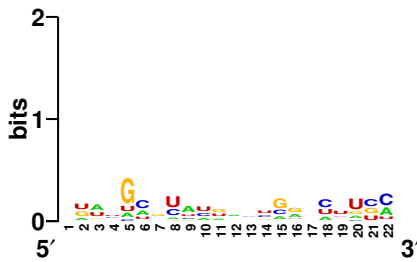

23-mers:

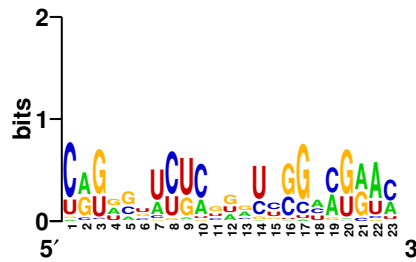

24-mers:

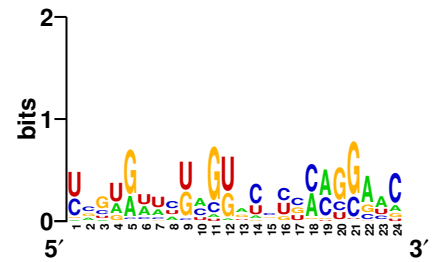

25-mers:

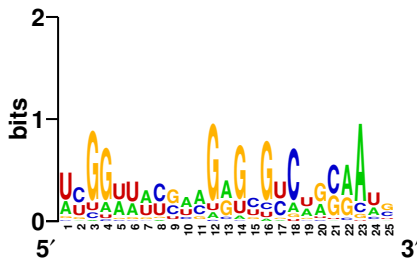

26-mers:

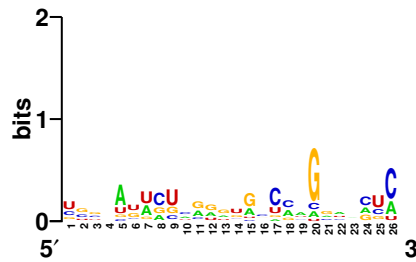

27-mers:

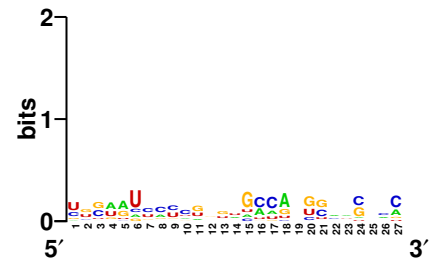

28-mers:

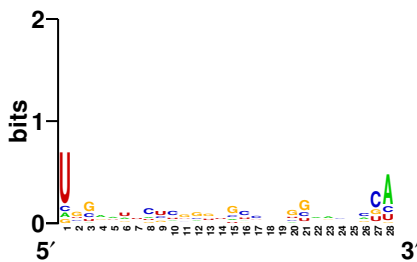

29-mers:

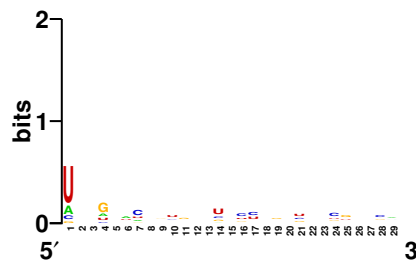

30-mers:

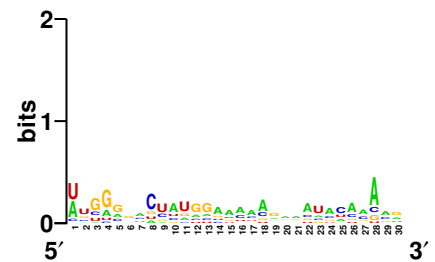

Adult male, library 2:

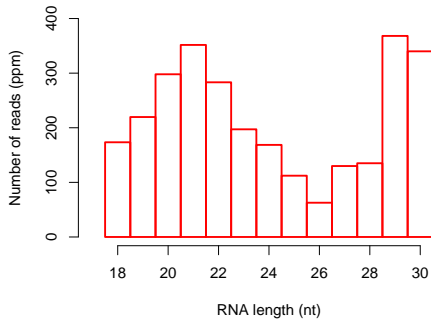

19-mers:

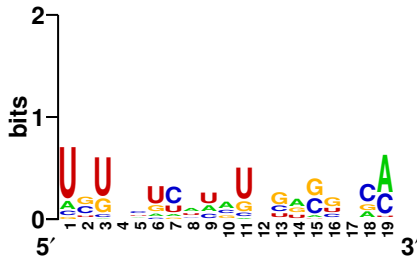

20-mers:

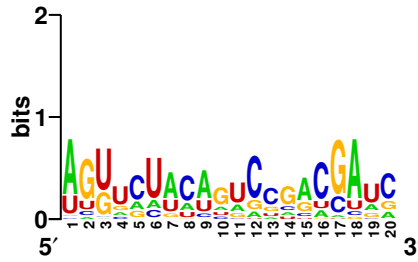

18-mers:

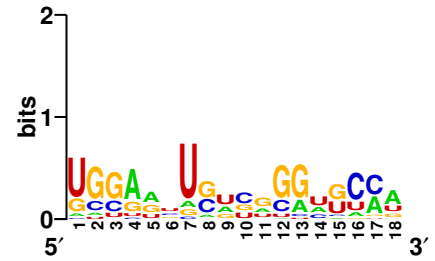

21-mers:

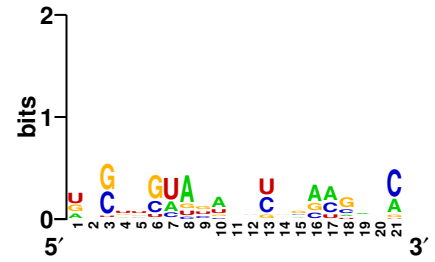

22-mers:

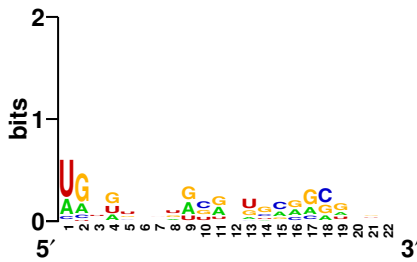

23-mers:

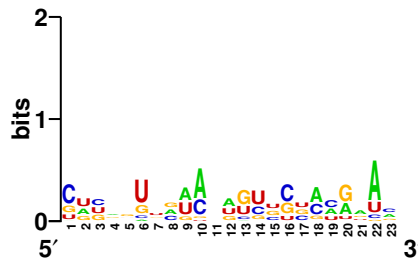

24-mers:

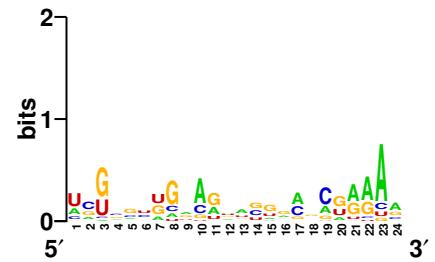

25-mers:

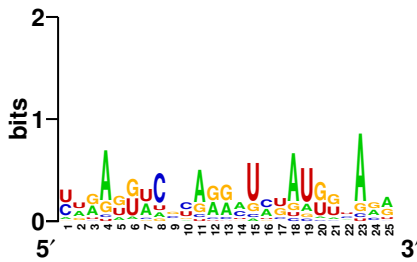

26-mers:

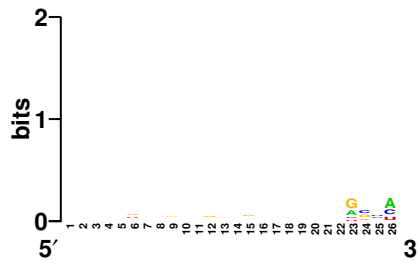

27-mers:

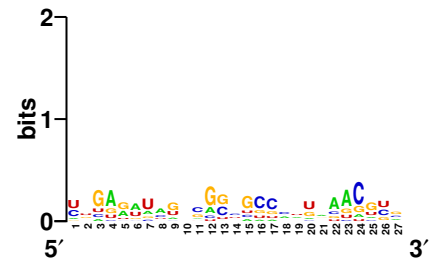

28-mers:

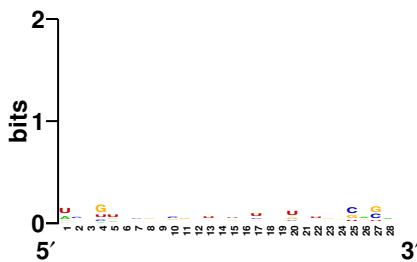

29-mers:

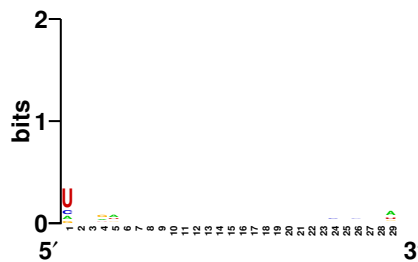

30-mers:

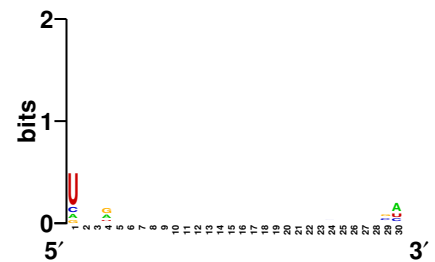

### 5.3 Libraries #3 (total 5' hydroxyl or polyphosphorylated small RNAs)

Embryo 8h, library 3:

18-mers:

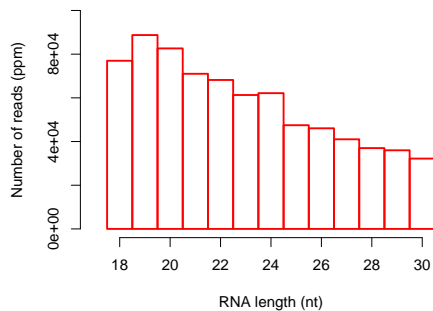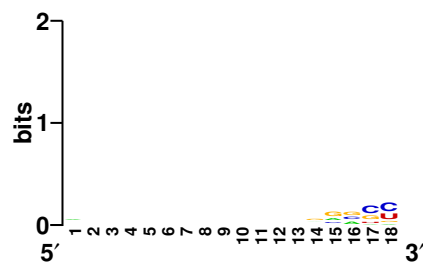

19-mers:

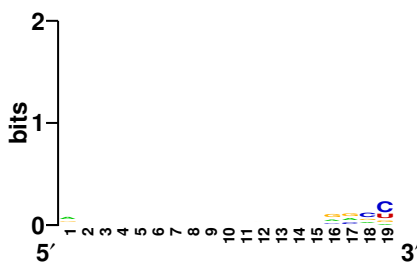

20-mers:

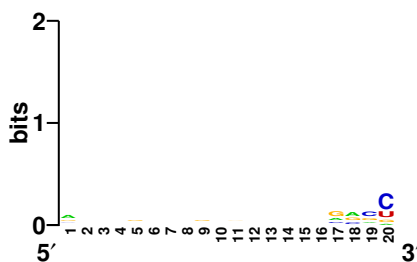

21-mers:

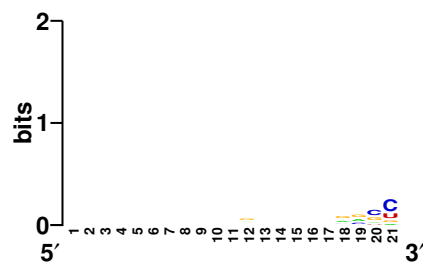

22-mers:

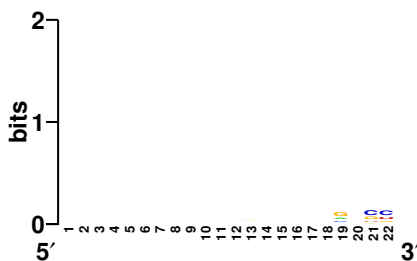

23-mers:

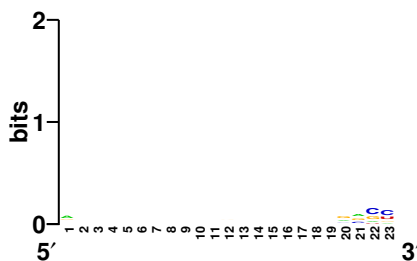

24-mers:

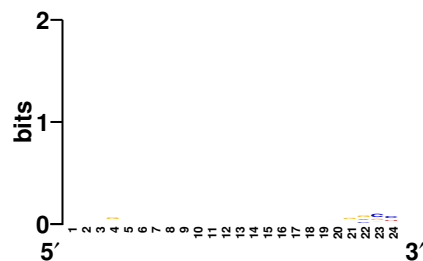

25-mers:

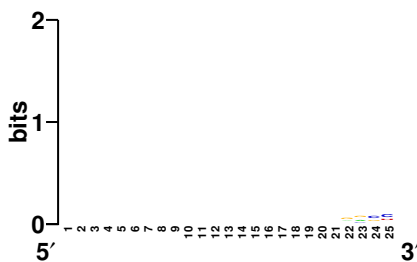

26-mers:

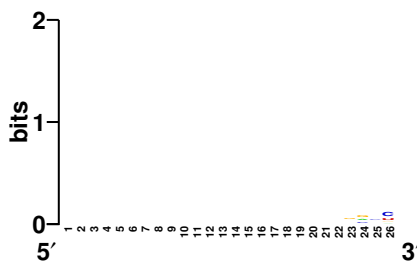

27-mers:

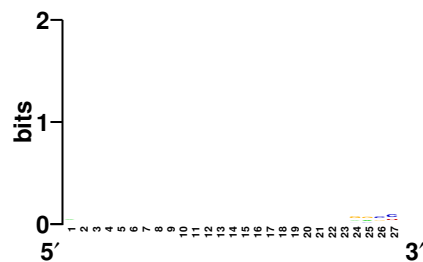

28-mers:

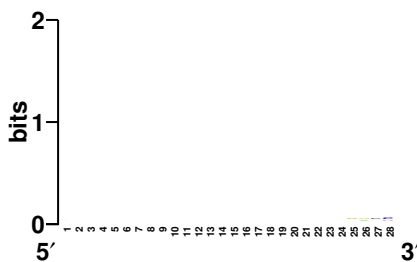

29-mers:

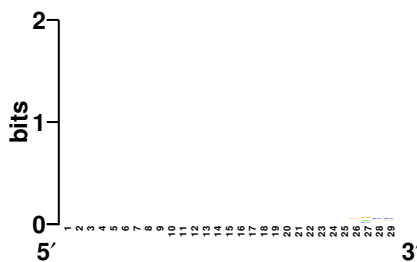

30-mers:

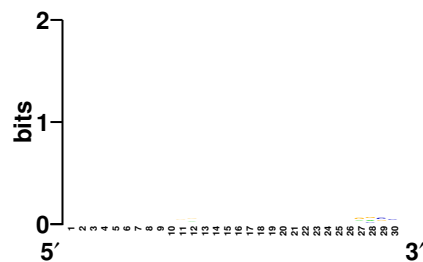

Embryo 15h, library 3:

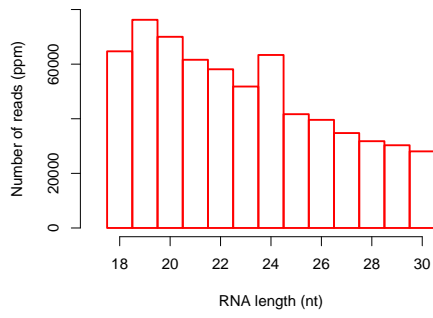

19-mers:

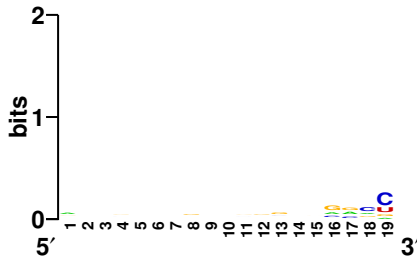

20-mers:

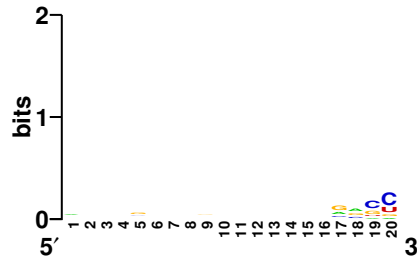

18-mers:

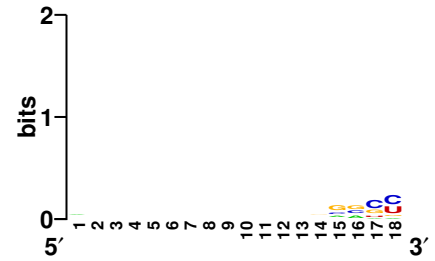

21-mers:

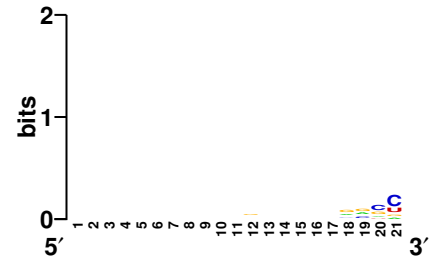

22-mers:

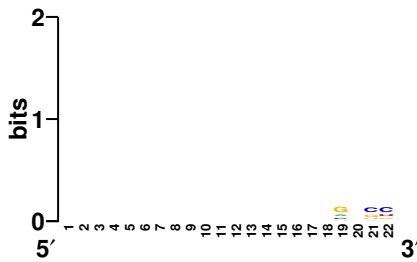

23-mers:

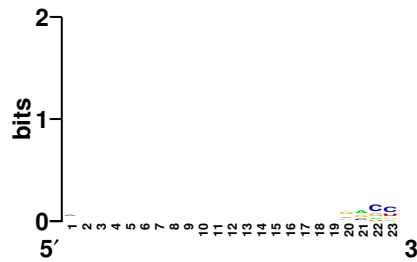

24-mers:

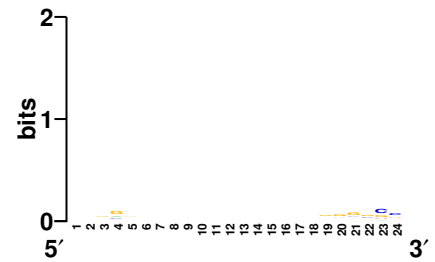

25-mers:

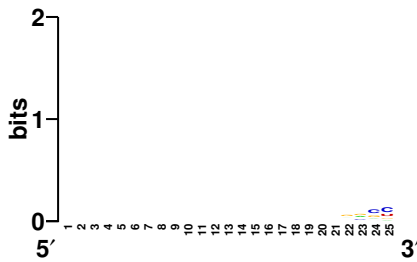

26-mers:

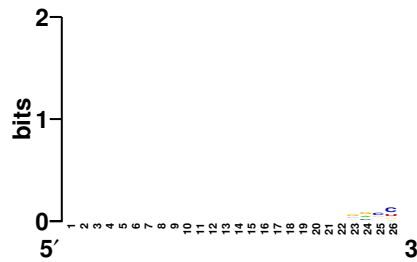

27-mers:

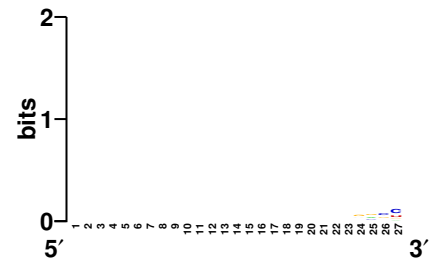

28-mers:

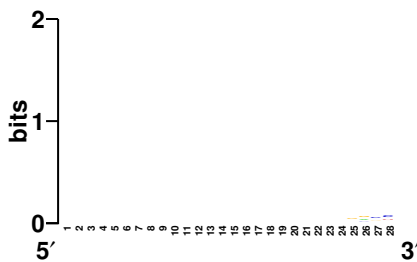

29-mers:

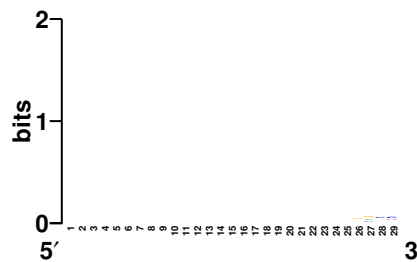

30-mers:

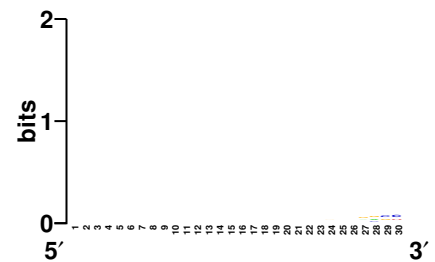



Embryo 36h, library 3:

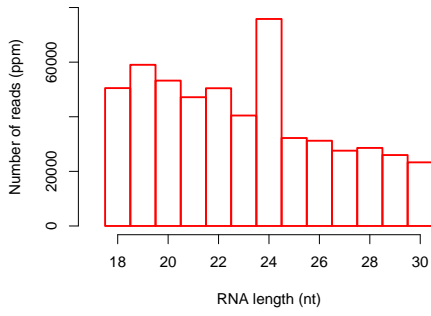

19-mers:

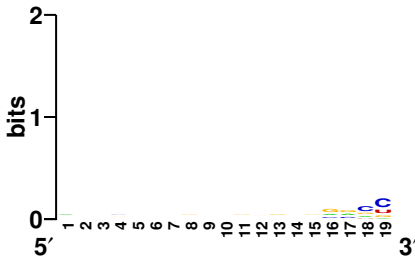

20-mers:

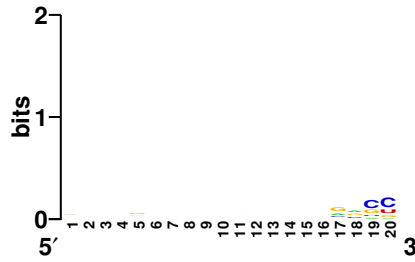

18-mers:

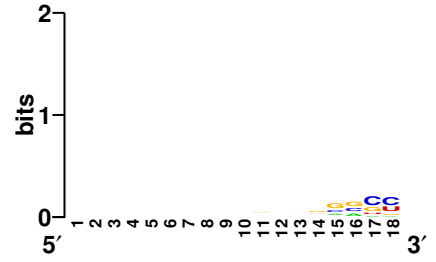

21-mers:

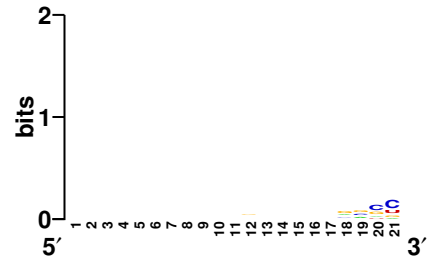

22-mers:

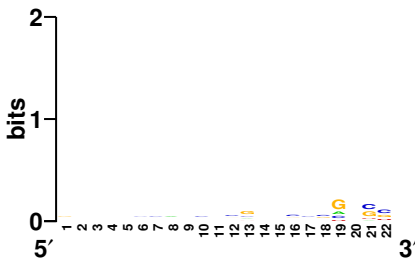

23-mers:

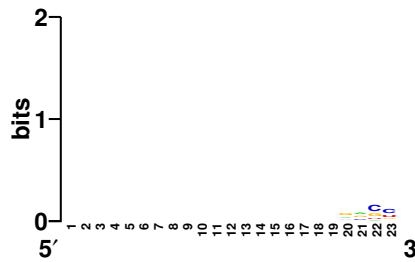

24-mers:

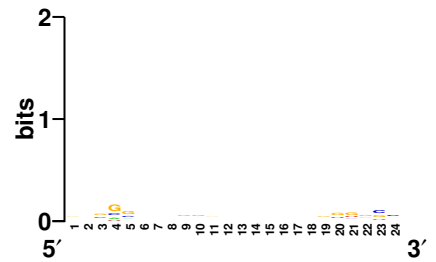

25-mers:

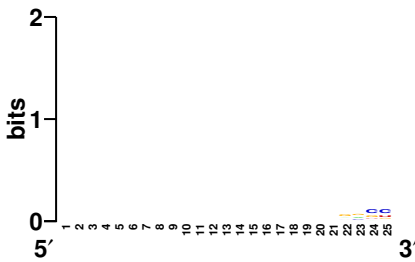

26-mers:

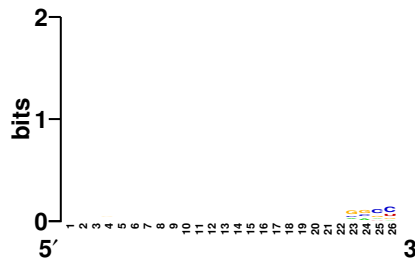

27-mers:

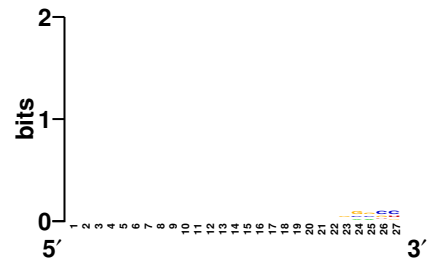

28-mers:

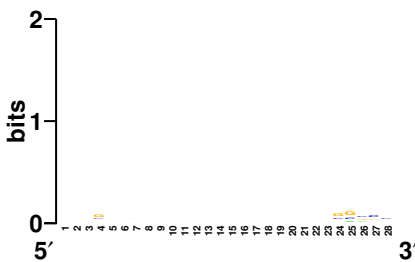

29-mers:

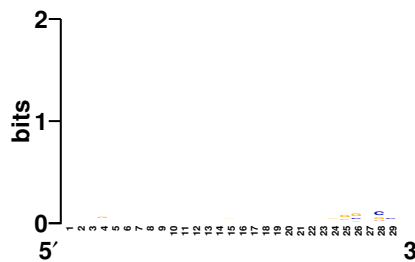

30-mers:

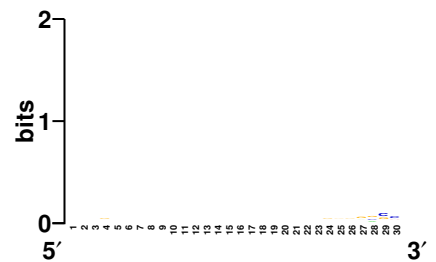

Embryo 60h, library 3:

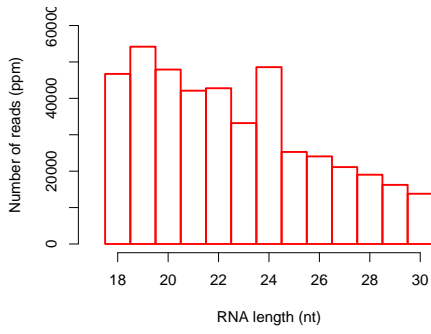

19-mers:

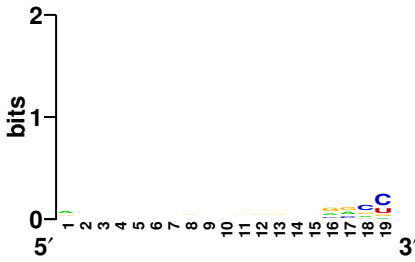

20-mers:

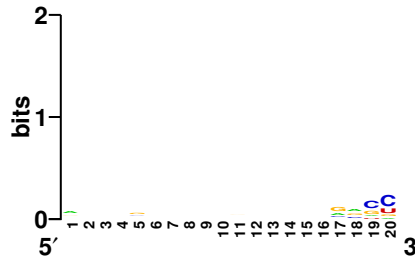

18-mers:

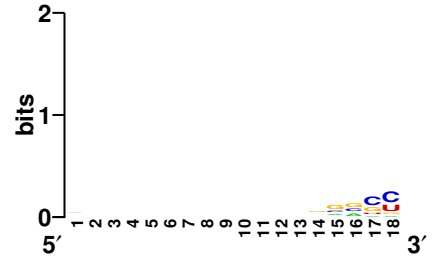

21-mers:

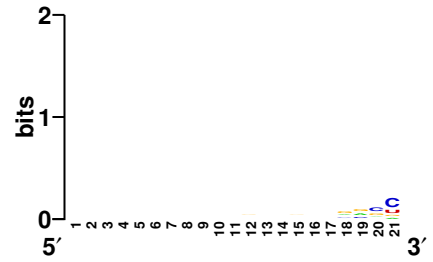

22-mers:

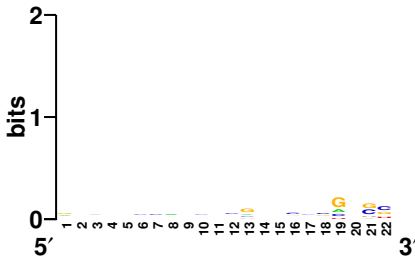

23-mers:

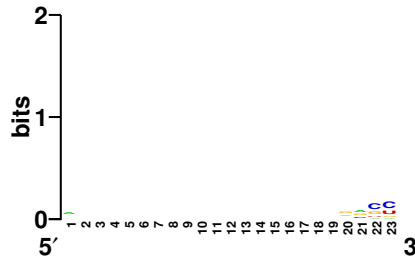

24-mers:

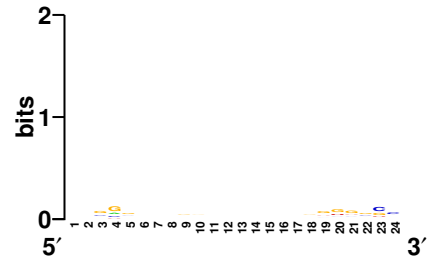

25-mers:

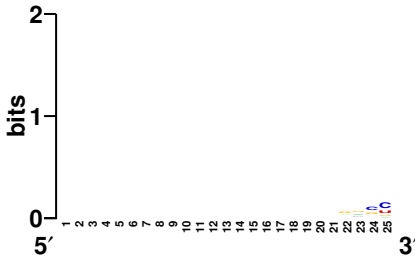

26-mers:

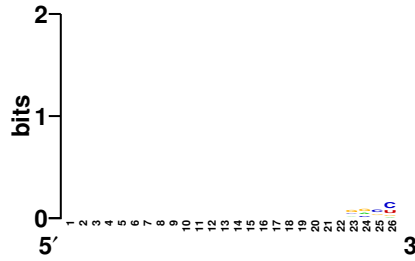

27-mers:

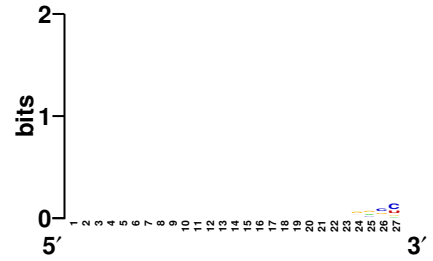

28-mers:

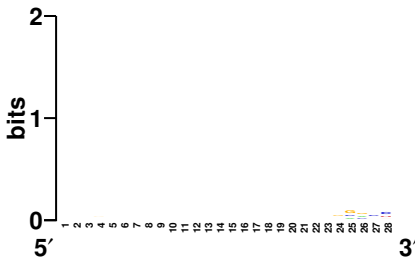

29-mers:

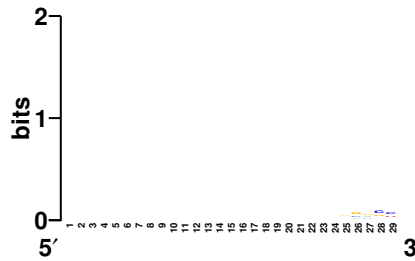

30-mers:

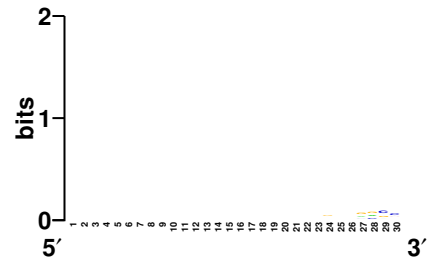

Adult female, library 3:

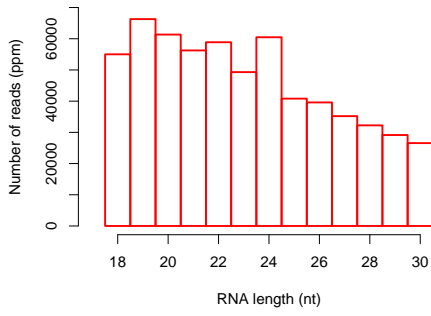

19-mers:

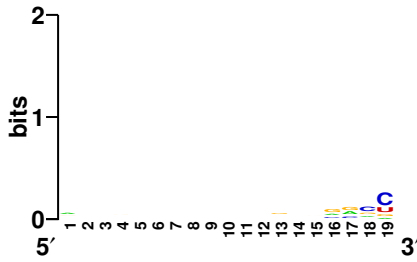

20-mers:

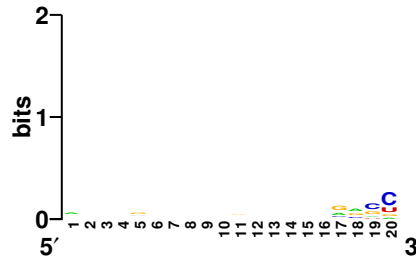

18-mers:

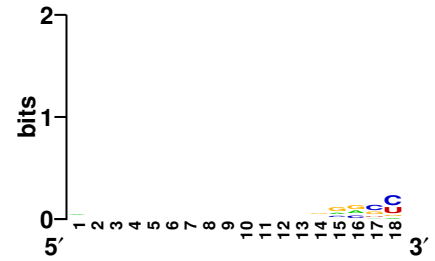

21-mers:

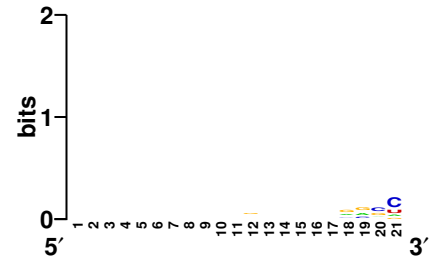

22-mers:

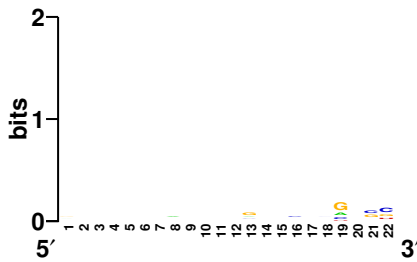

23-mers:

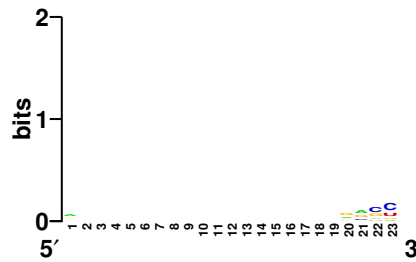

24-mers:

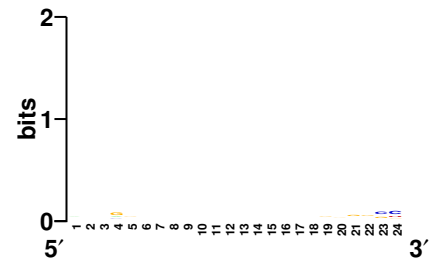

25-mers:

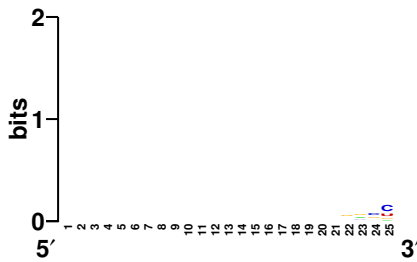

26-mers:

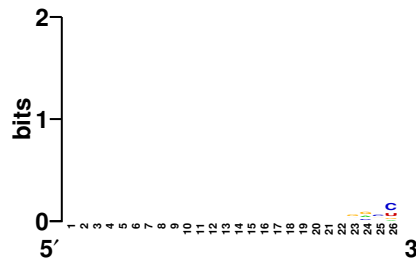

27-mers:

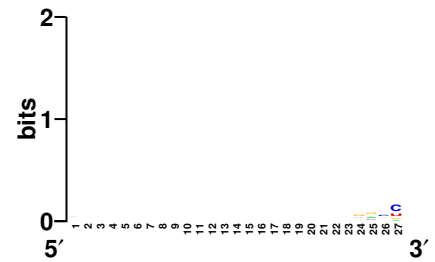

28-mers:

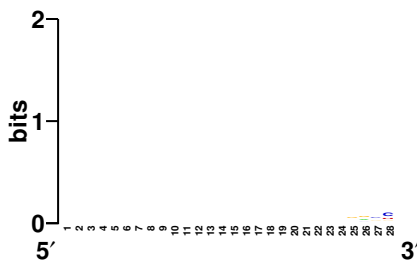

29-mers:

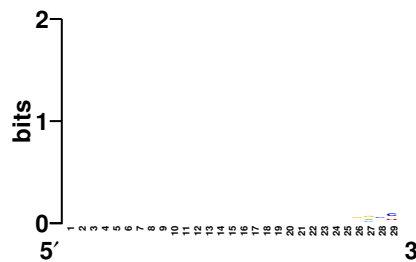

30-mers:

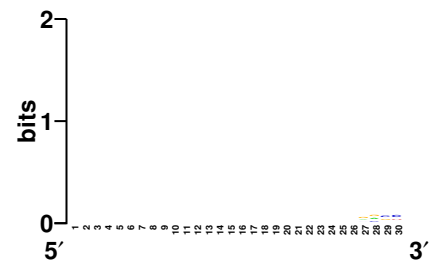

Adult male, library 3:

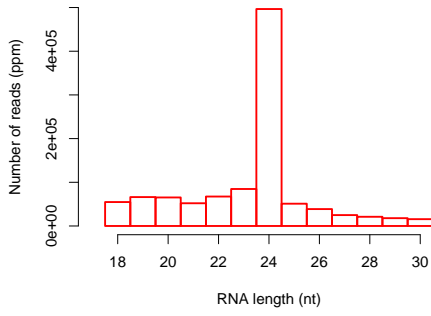

19-mers:

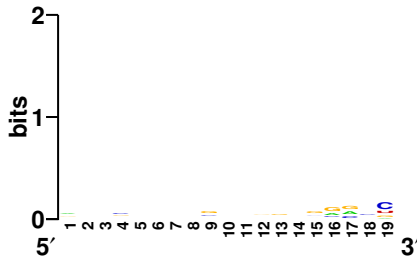

22-mers:

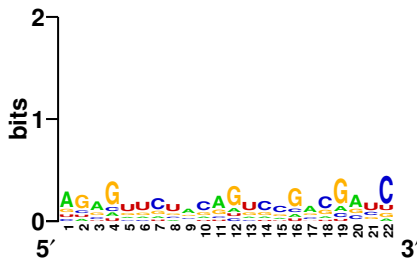

25-mers:

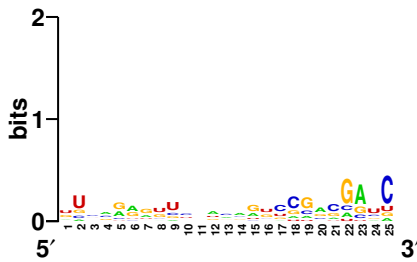

28-mers:

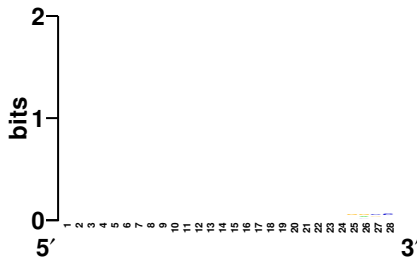

20-mers:

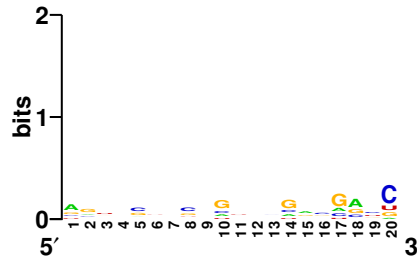

23-mers:

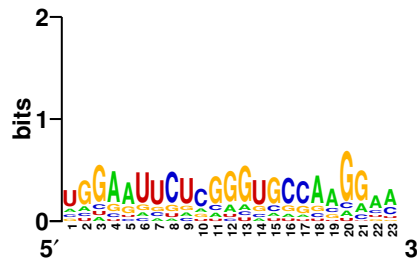

26-mers:

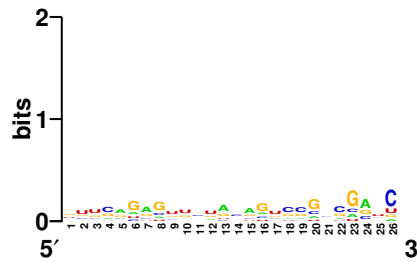

29-mers:

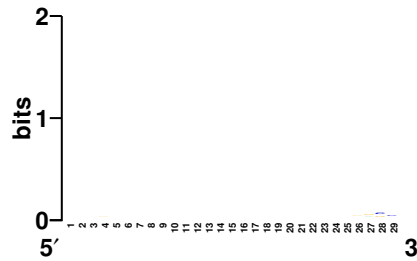

18-mers:

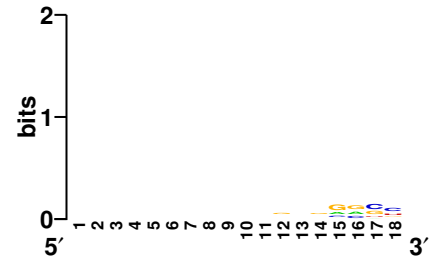

21-mers:

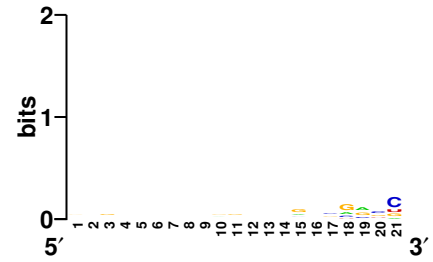

24-mers:

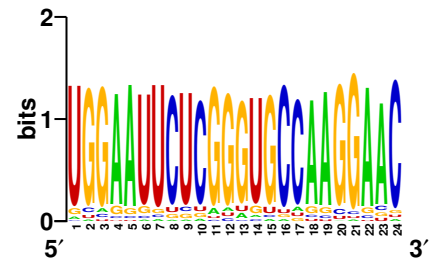

27-mers:

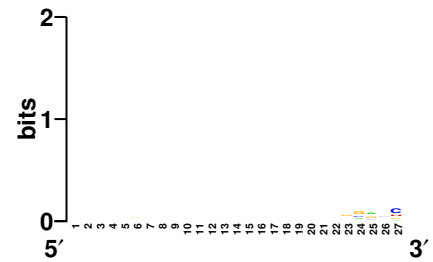

30-mers:

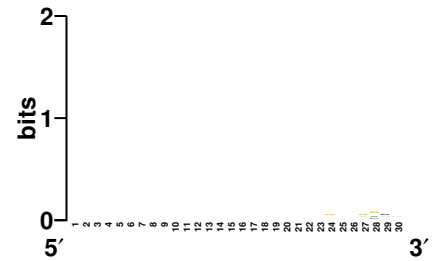

## 5.4 Libraries #4 (3' modified, 5' hydroxyl or polyphosphorylated small RNAs)

Embryo 8h, library 4:

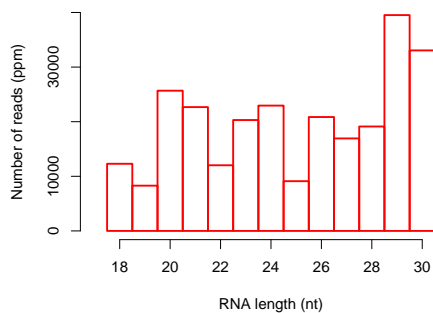

18-mers:

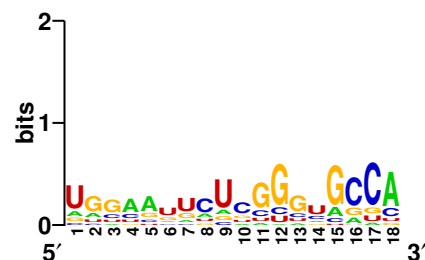

19-mers:

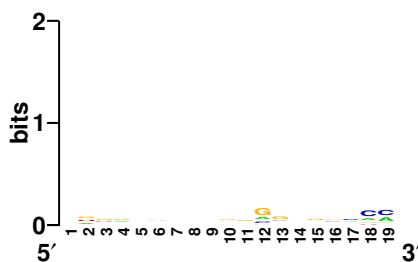

20-mers:

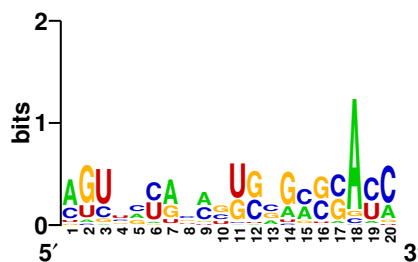

21-mers:

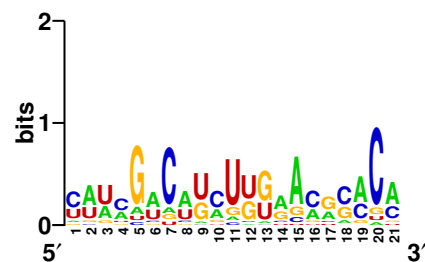

22-mers:

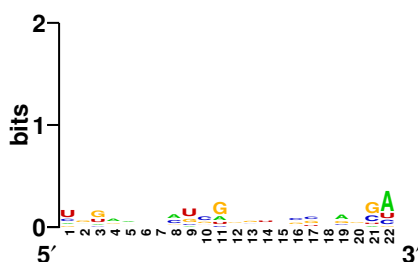

23-mers:

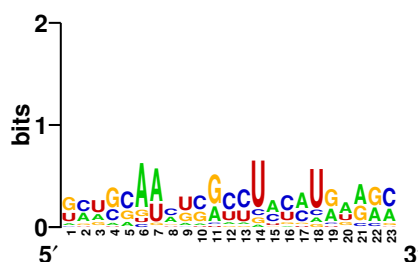

24-mers:

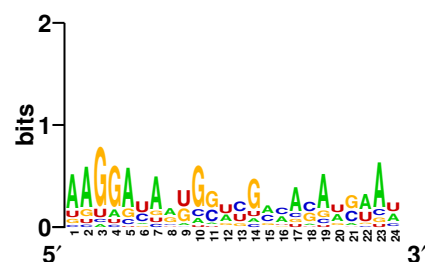

25-mers:

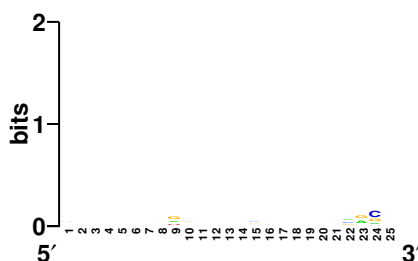

26-mers:

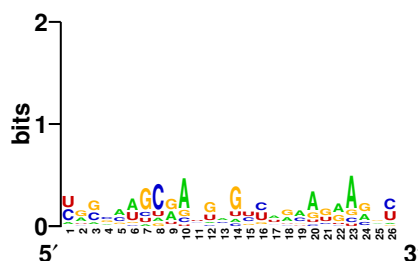

27-mers:

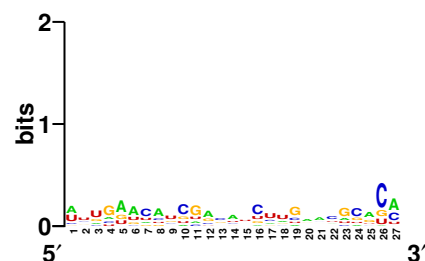

28-mers:

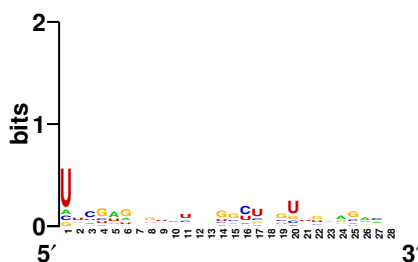

29-mers:

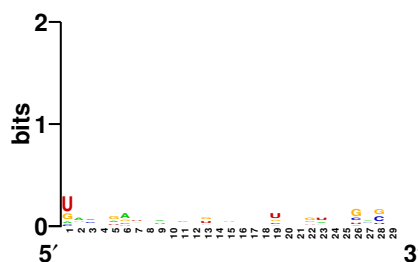

30-mers:

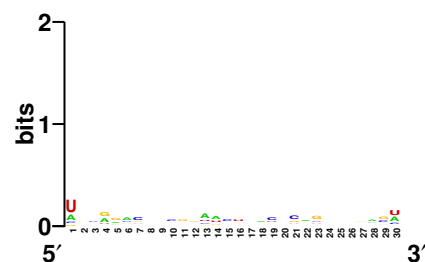

Embryo 15h, library 4:

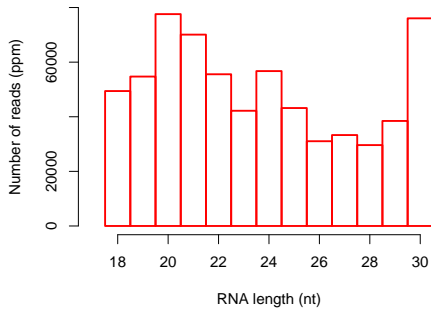

19-mers:

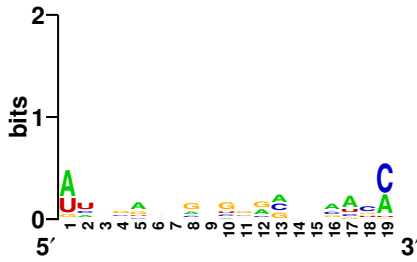

20-mers:

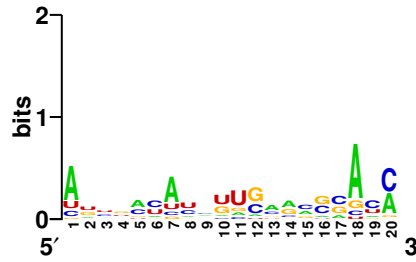

18-mers:

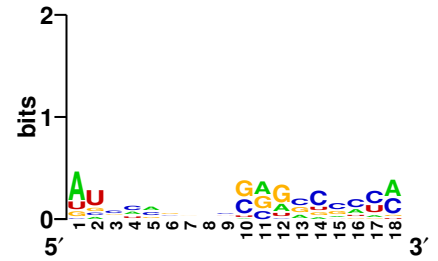

21-mers:

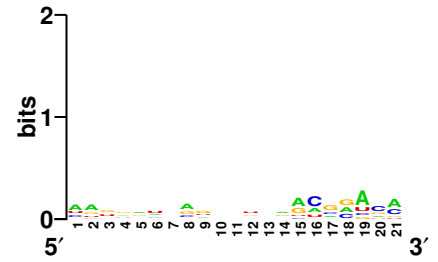

22-mers:

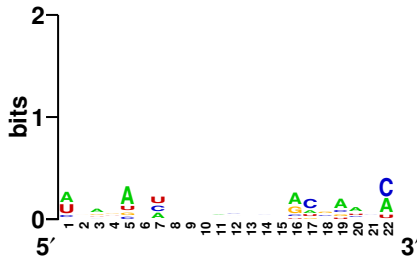

23-mers:

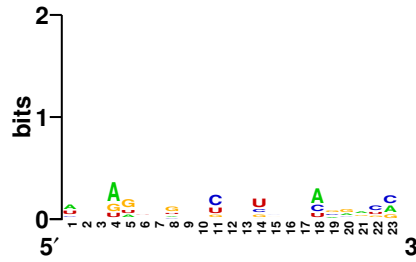

24-mers:

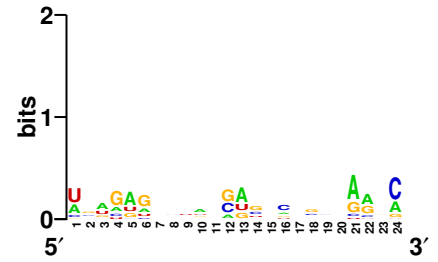

25-mers:

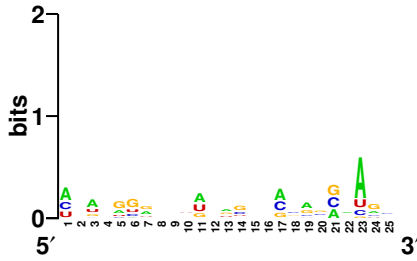

26-mers:

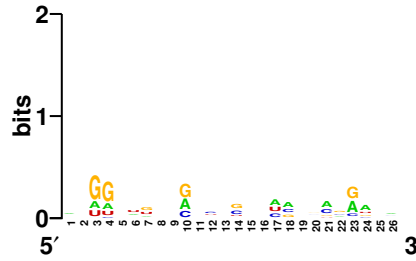

27-mers:

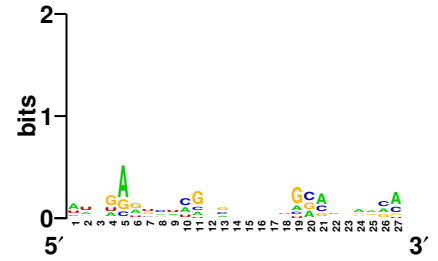

28-mers:

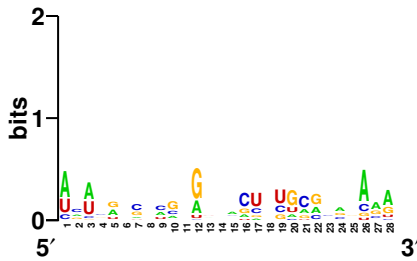

29-mers:

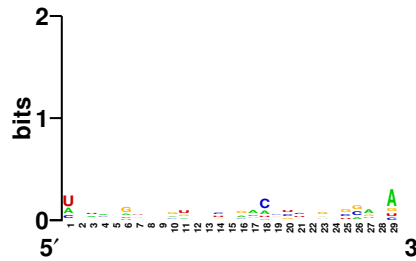

30-mers:

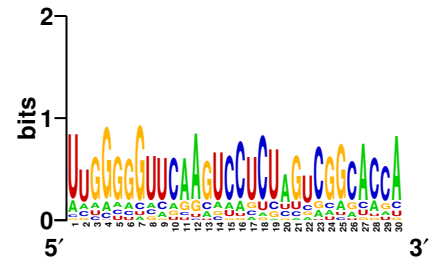

Embryo 36h, library 4:

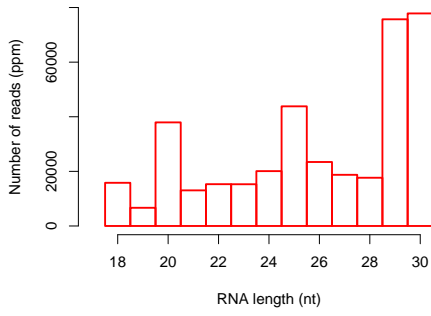

19-mers:

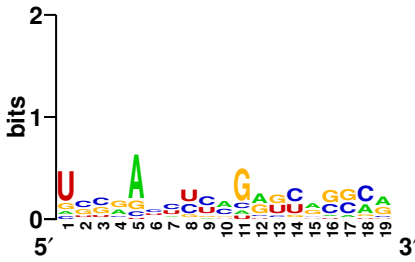

20-mers:

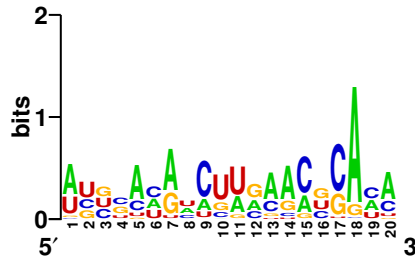

18-mers:

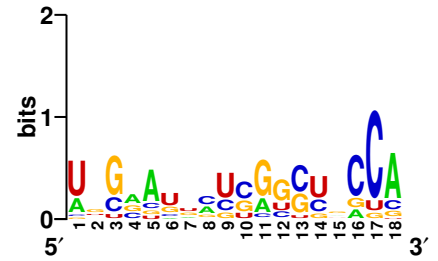

21-mers:

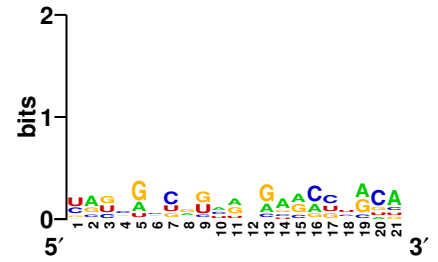

22-mers:

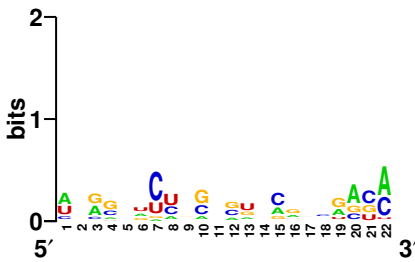

23-mers:

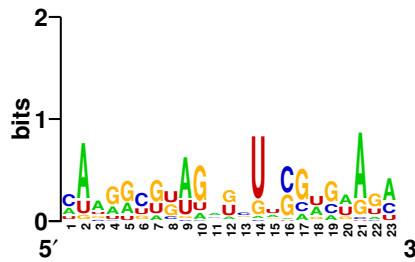

24-mers:

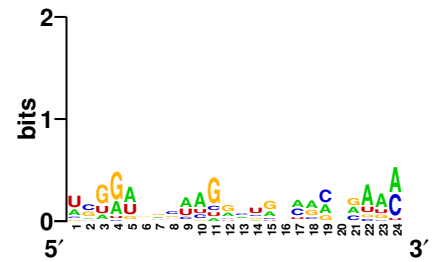

25-mers:

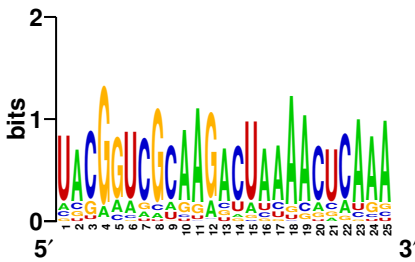

26-mers:

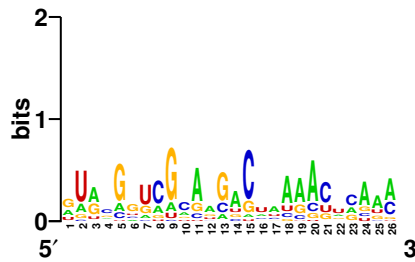

27-mers:

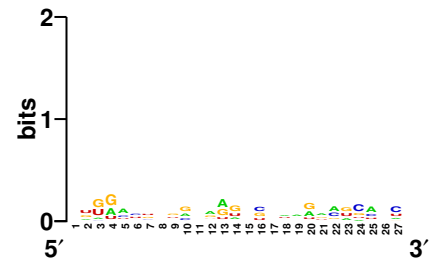

28-mers:

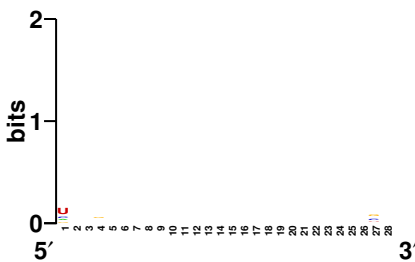

29-mers:

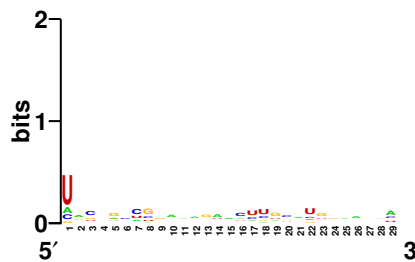

30-mers:

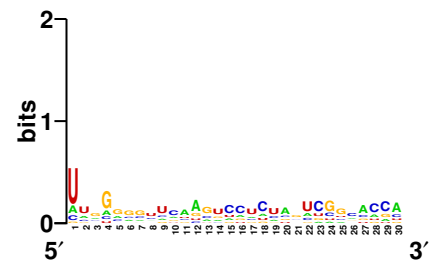

Embryo 60h, library 4:

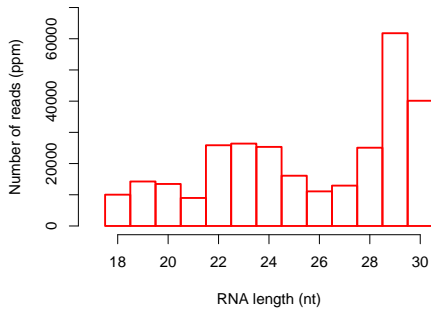

19-mers:

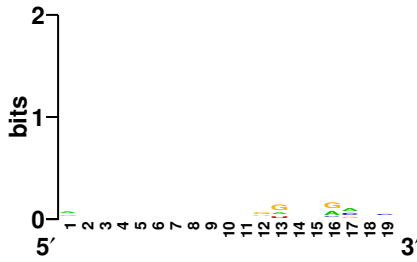

20-mers:

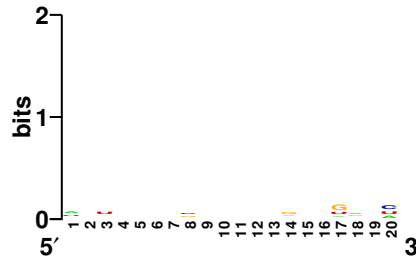

18-mers:

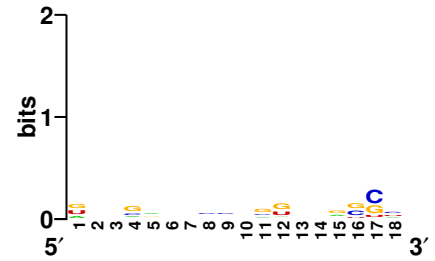

21-mers:

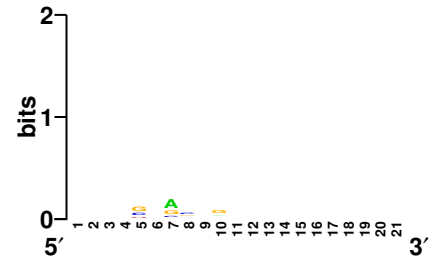

22-mers:

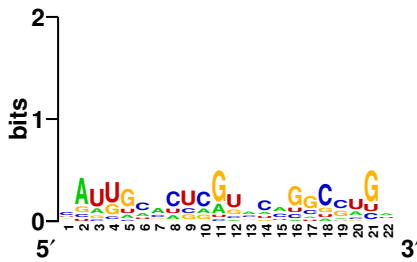

23-mers:

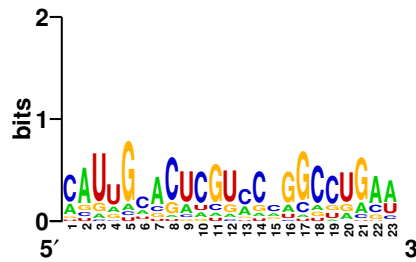

24-mers:

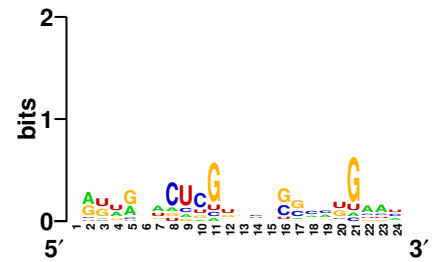

25-mers:

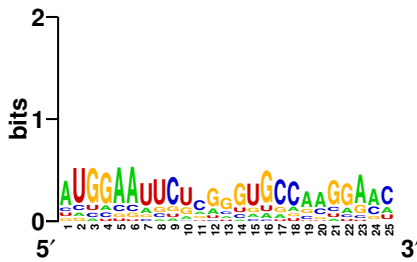

26-mers:

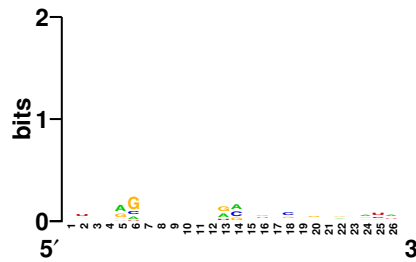

27-mers:

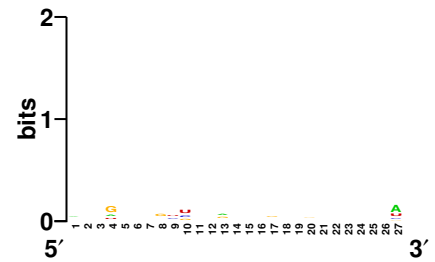

28-mers:

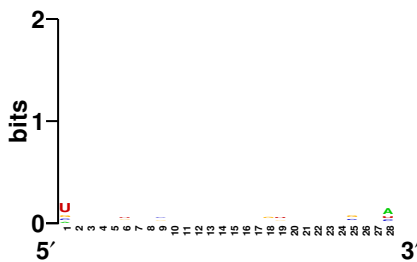

29-mers:

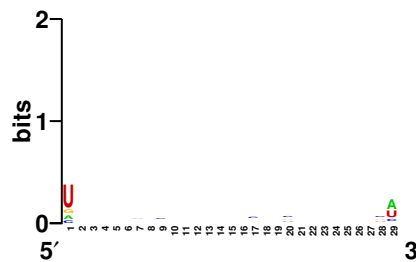

30-mers:

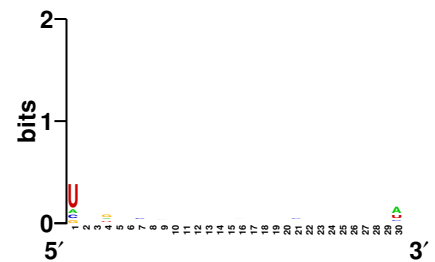



Adult female, library 4:

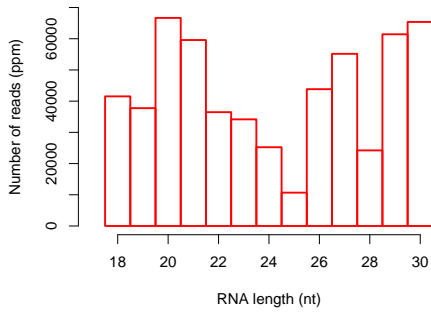

19-mers:

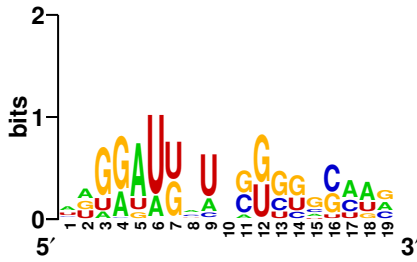

20-mers:

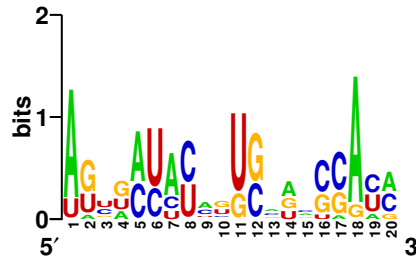

18-mers:

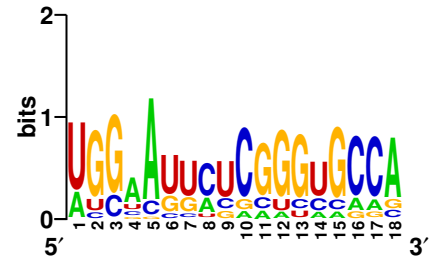

21-mers:

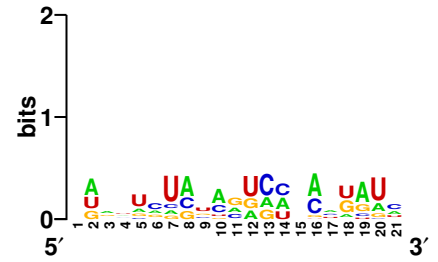

22-mers:

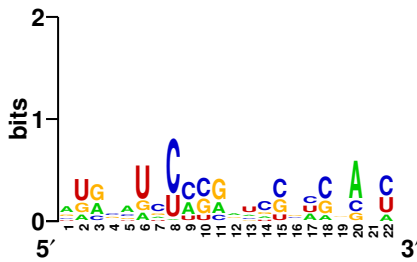

23-mers:

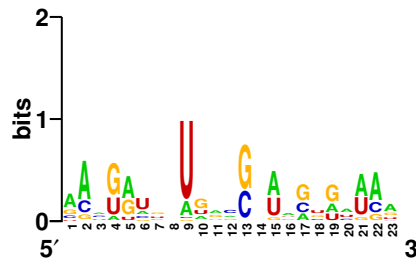

24-mers:

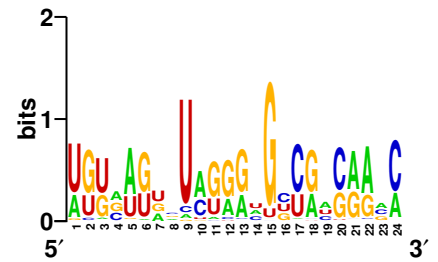

25-mers:

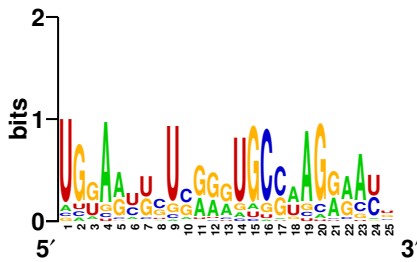

26-mers:

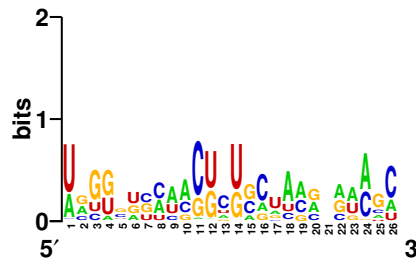

27-mers:

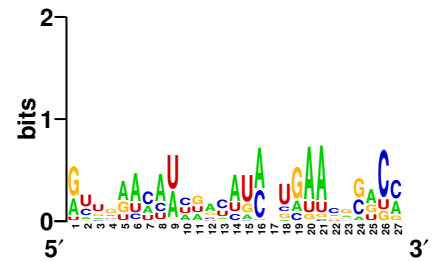

28-mers:

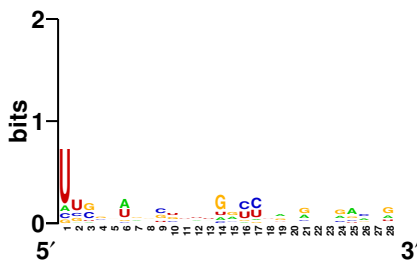

29-mers:

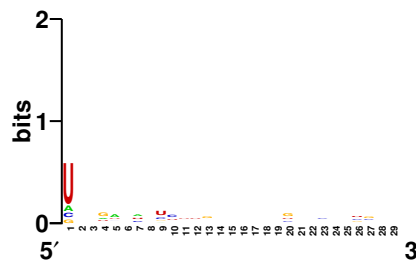

30-mers:

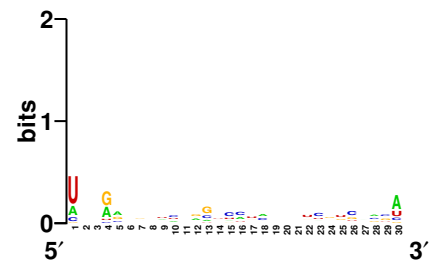

Adult male, library 4:

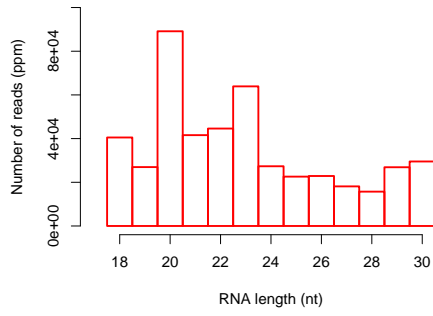

19-mers:

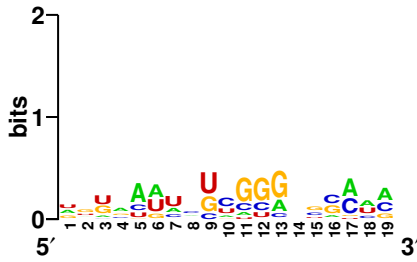

20-mers:

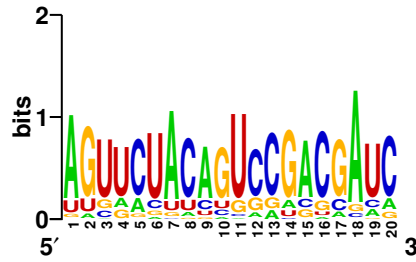

18-mers:

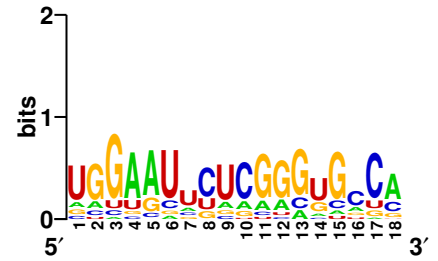

21-mers:

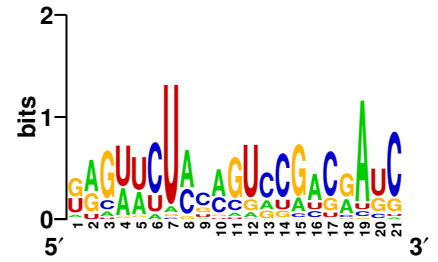

22-mers:

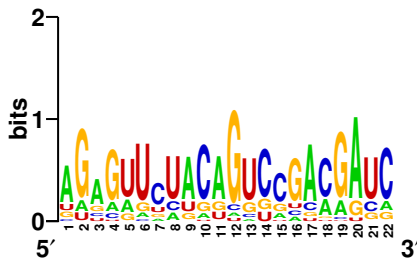

23-mers:

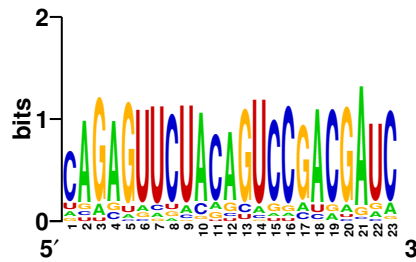

24-mers:

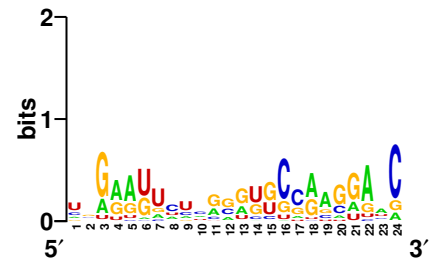

25-mers:

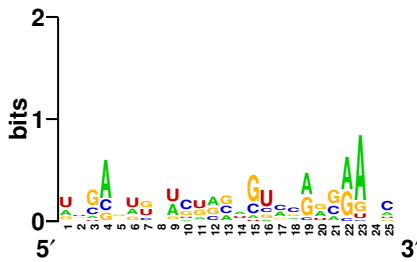

26-mers:

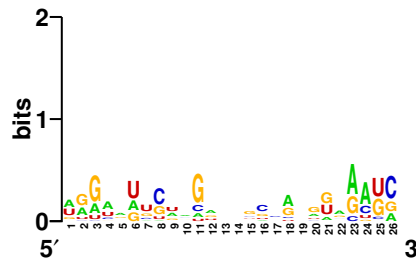

27-mers:

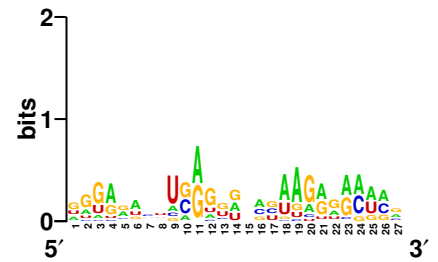

28-mers:

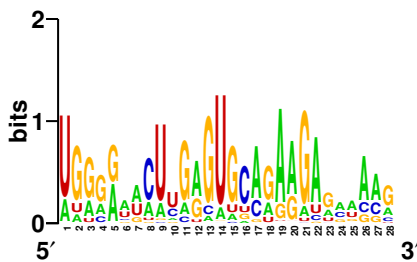

29-mers:

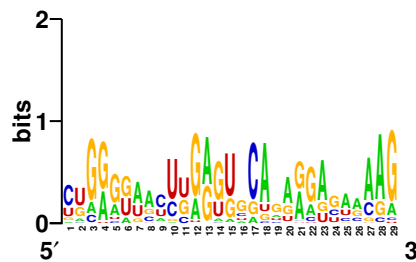

30-mers:

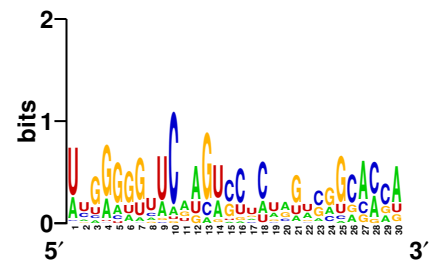

## 6 Analysis of *Cænorhabditis elegans* data [Gu et al., 2009] with the same method

### 6.1 Genomic reads not matching abundant ncRNAs

Library GSM455391 (18-26-mers, any number of 5' phosphates, replicate 1):

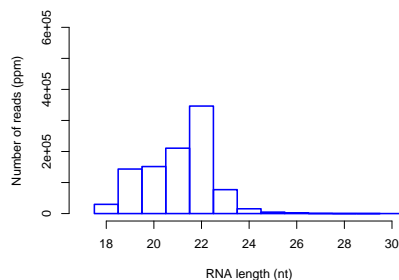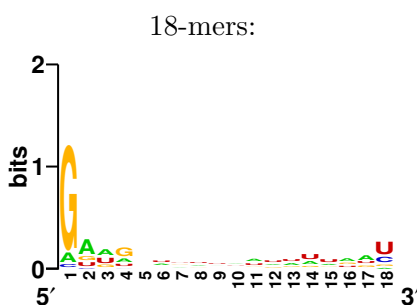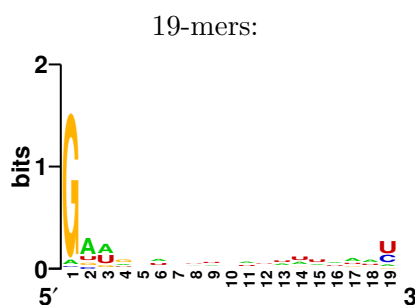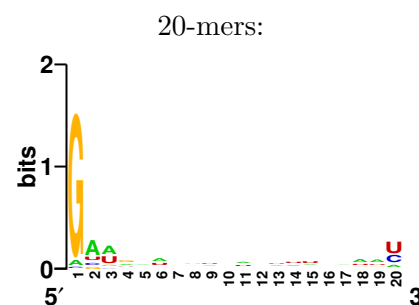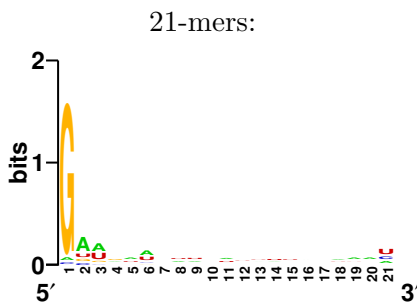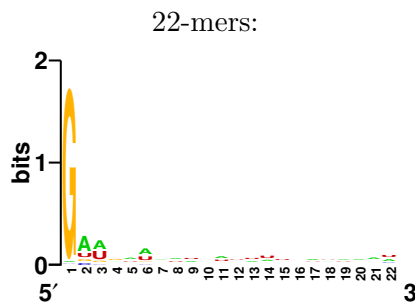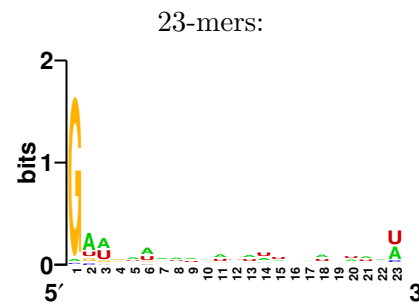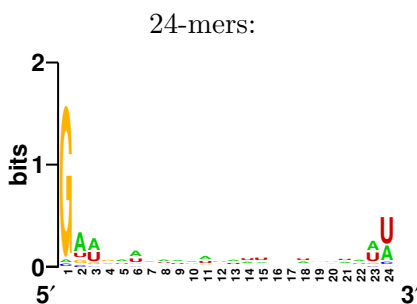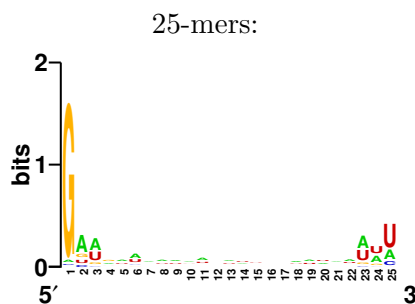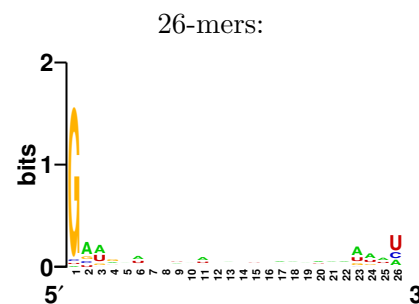

Library GSM455392 (18-26-mers, any number of 5' phosphates, replicate 2):

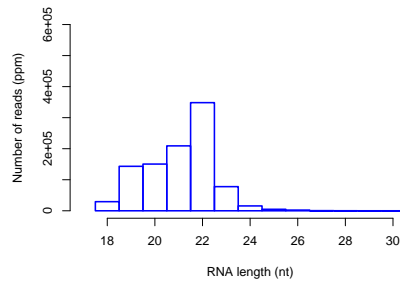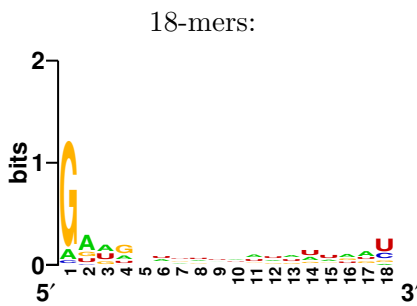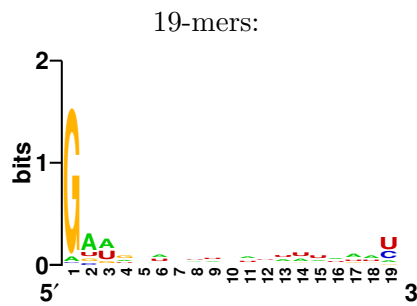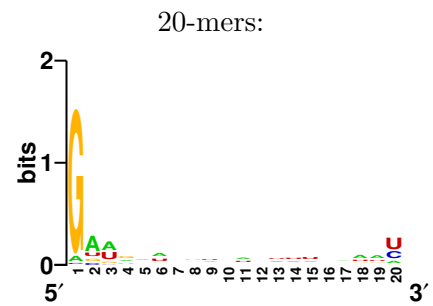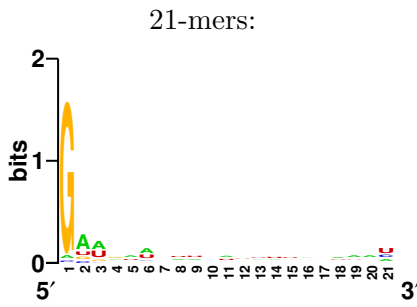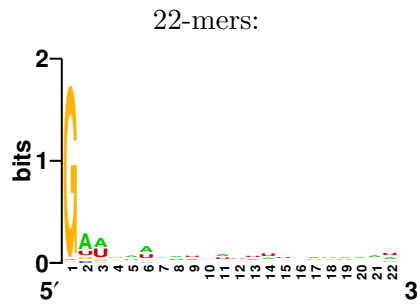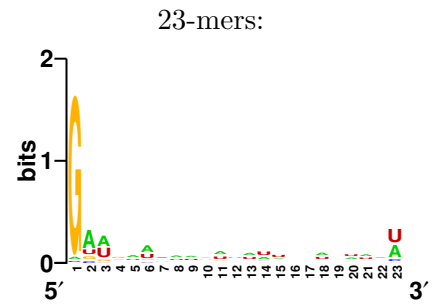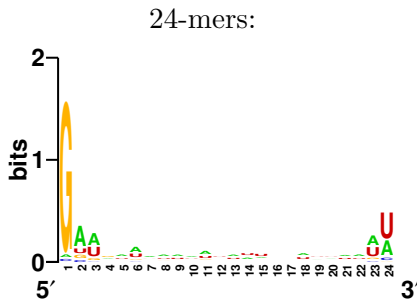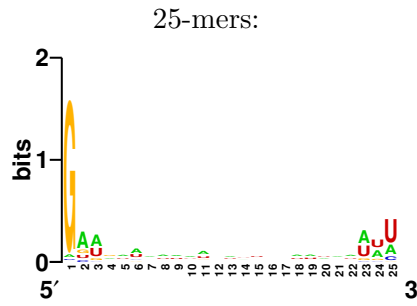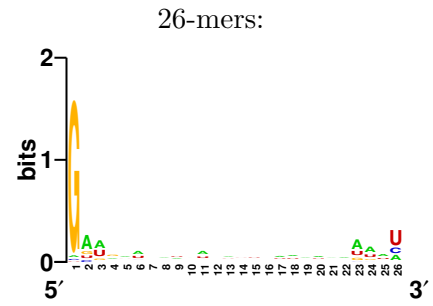

Library GSM455393 (18-26-mers, any number of 5' phosphates, replicate 3):

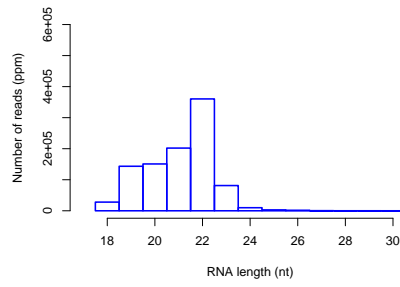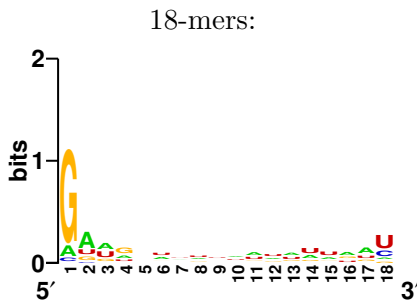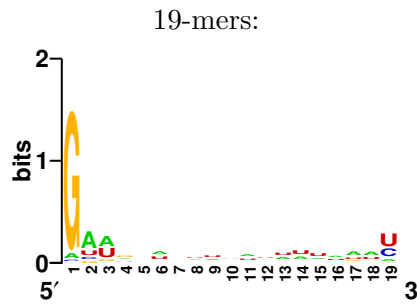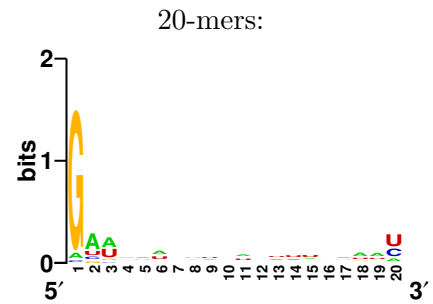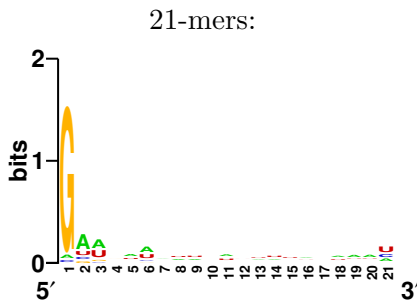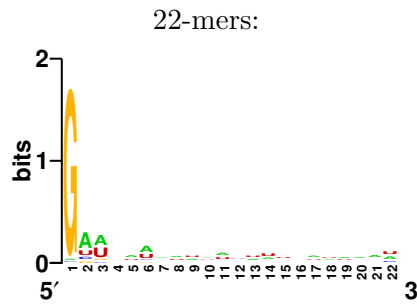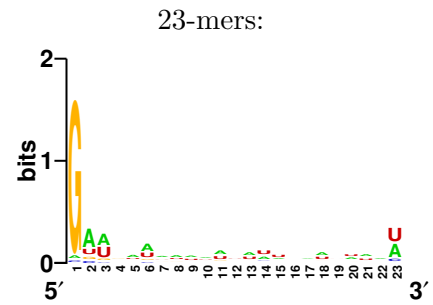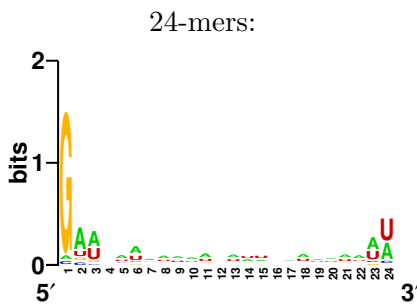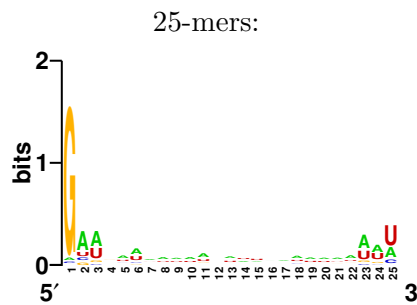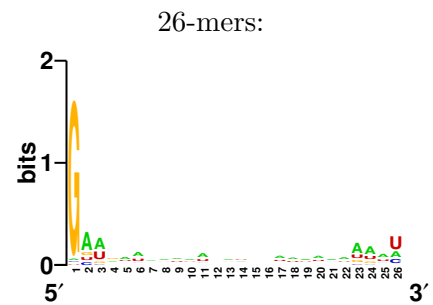



Antisense reads:

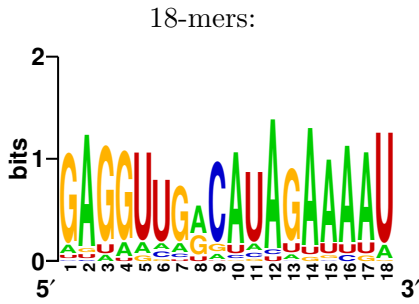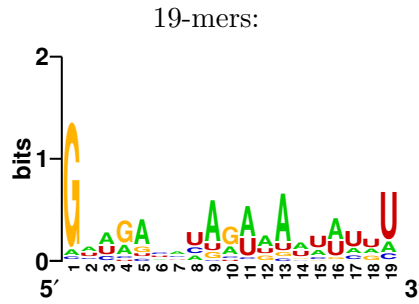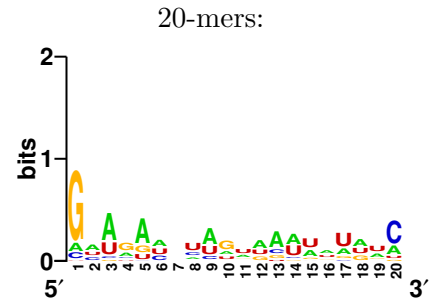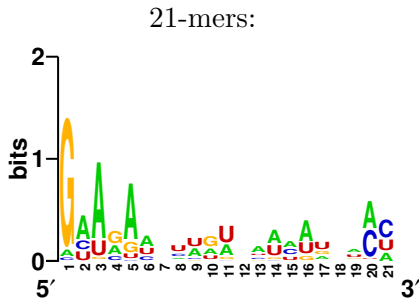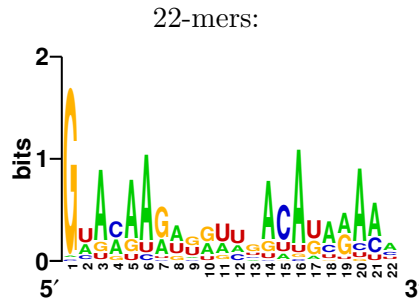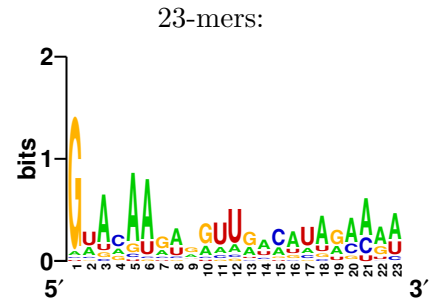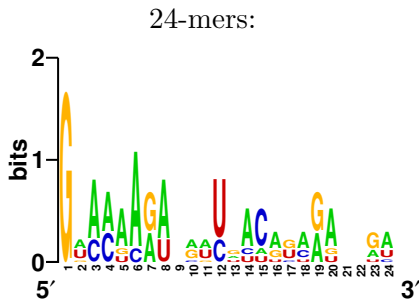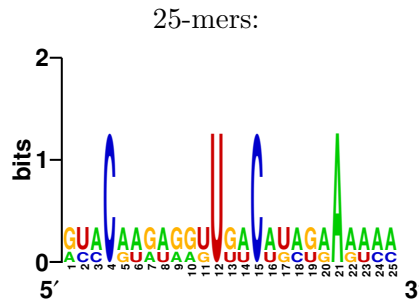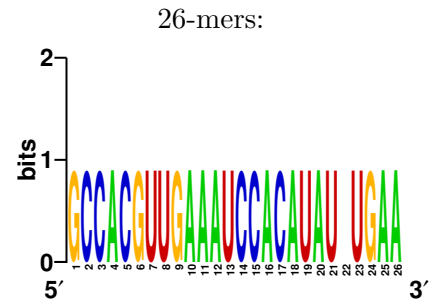

Library GSM455392 (18-26-mers, any number of 5' phosphates, replicate 2):

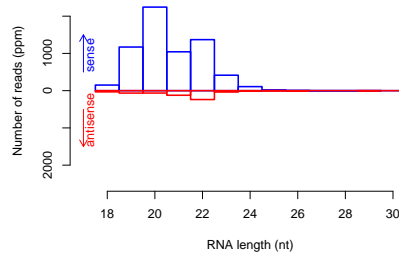

Sense reads:

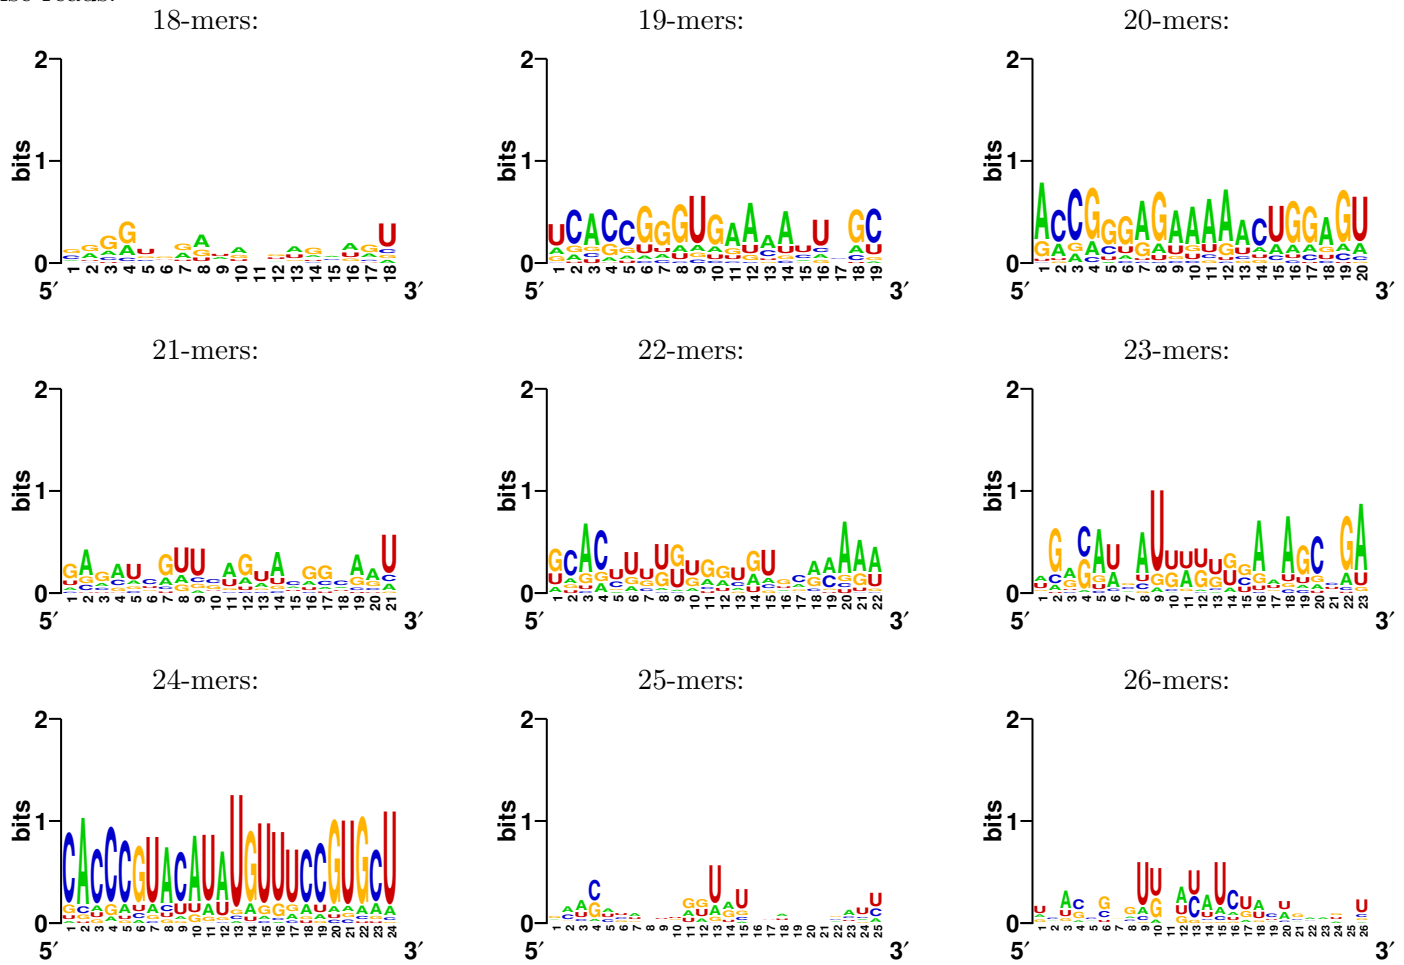



Antisense reads:

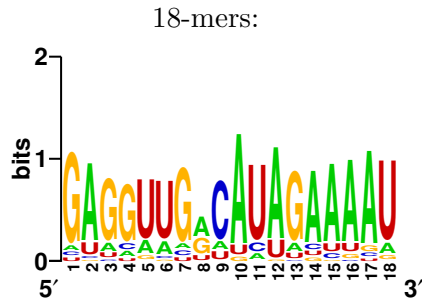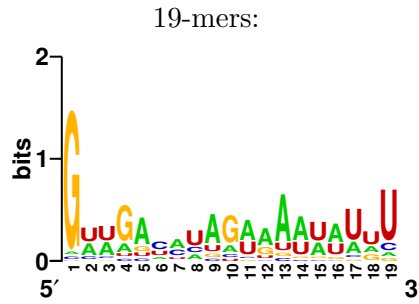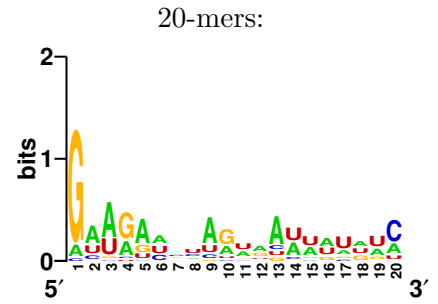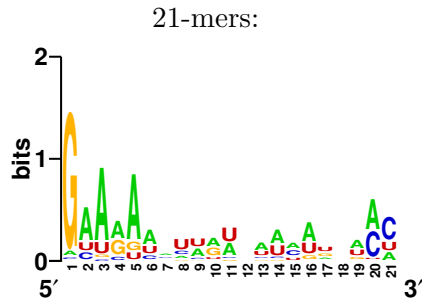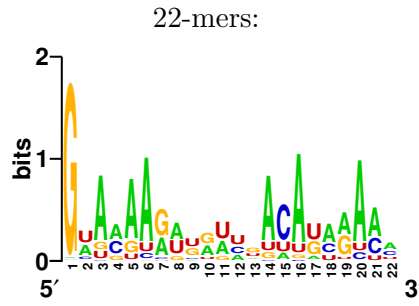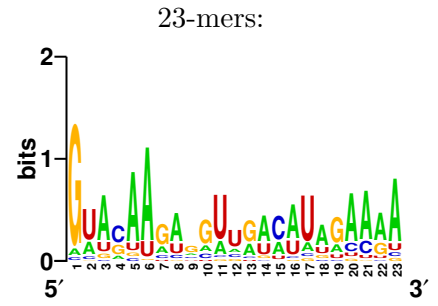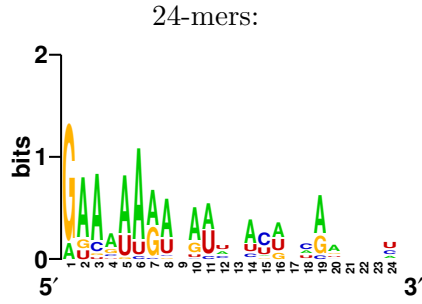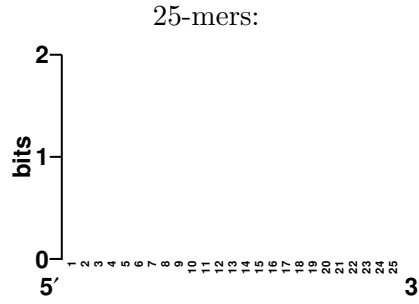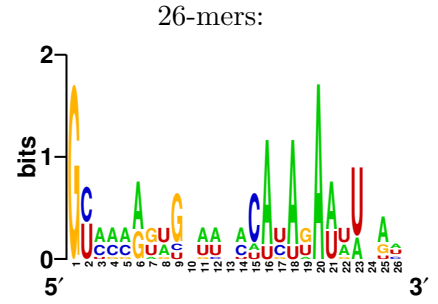

Library GSM455393 (18-26-mers, any number of 5' phosphates, replicate 3):

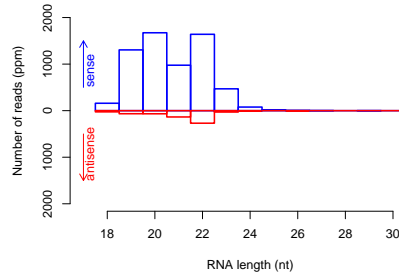

Sense reads:

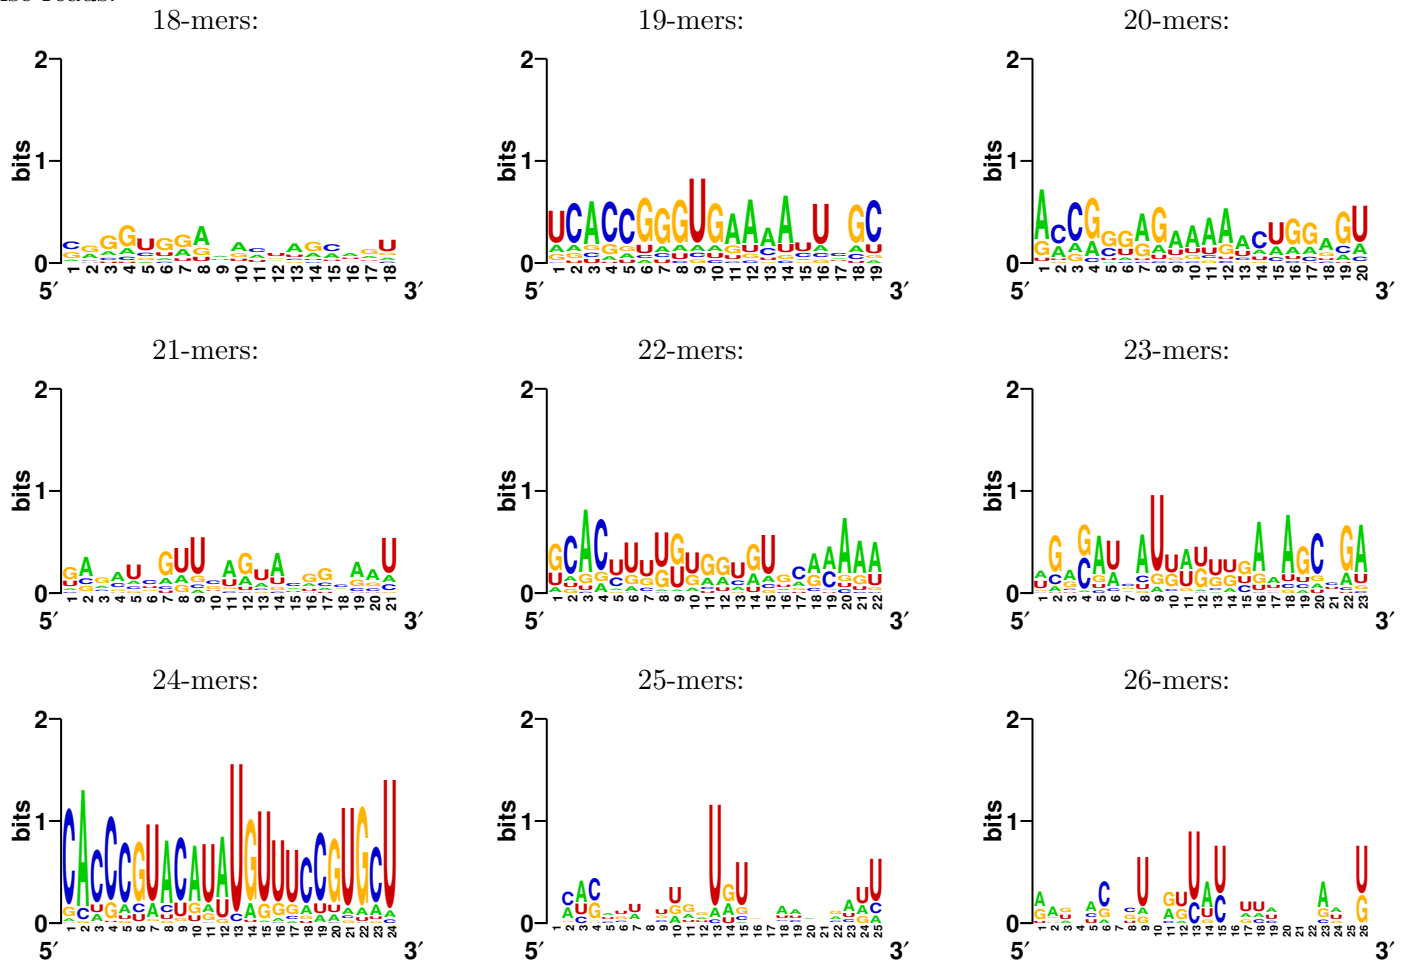

Antisense reads:

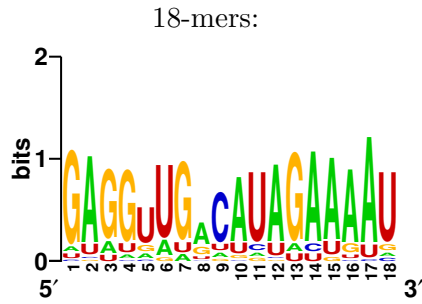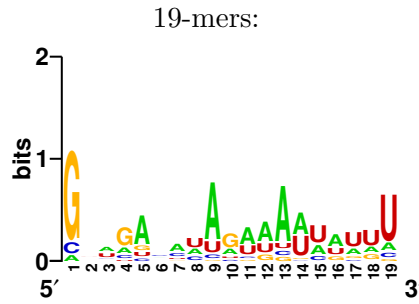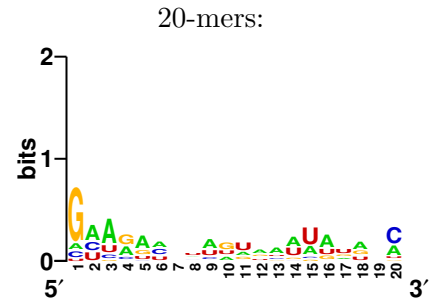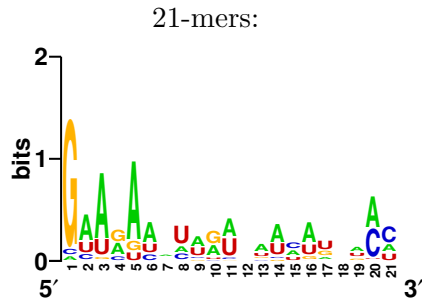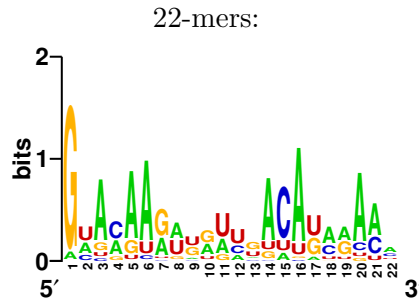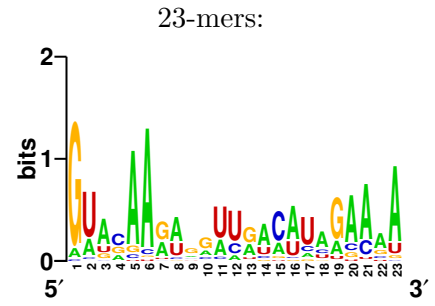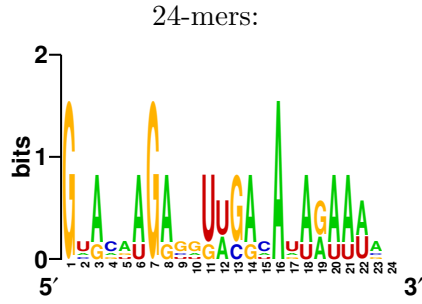

(no read)

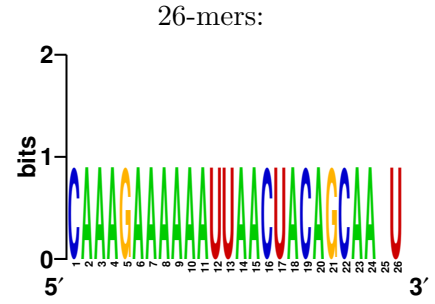

### 6.3 Transcriptome-matching reads (excluding pre-miRNA and abundant ncRNA-matching reads)

Library GSM455391 (18-26-mers, any number of 5' phosphates, replicate 1):

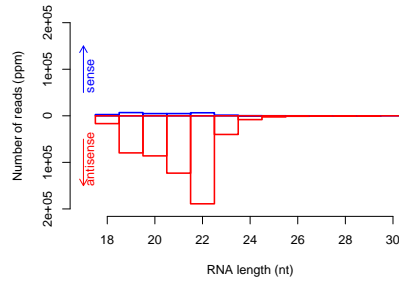

Sense reads:

18-mers:

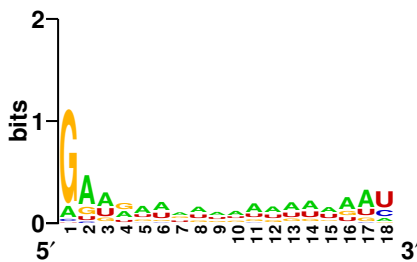

19-mers:

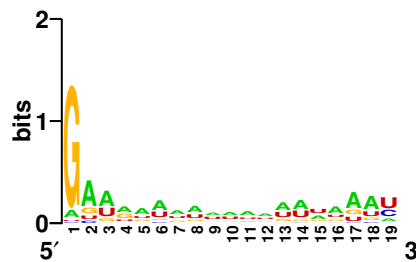

20-mers:

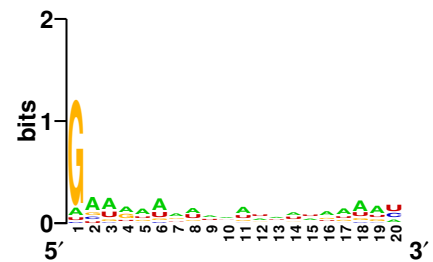

21-mers:

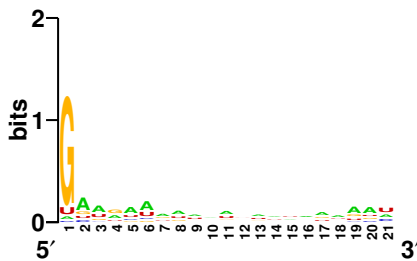

22-mers:

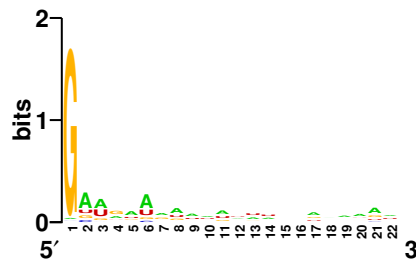

23-mers:

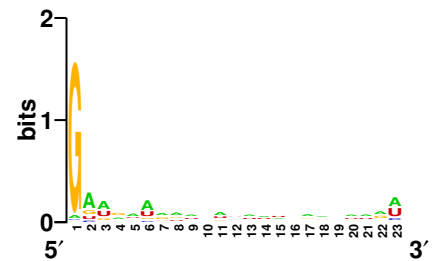

24-mers:

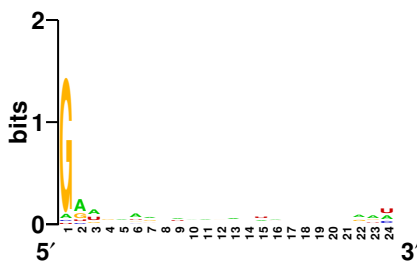

25-mers:

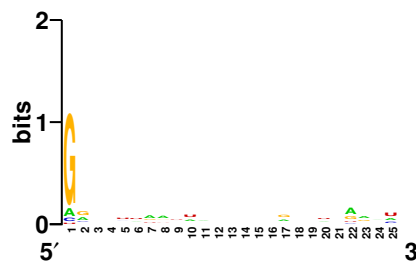

26-mers:

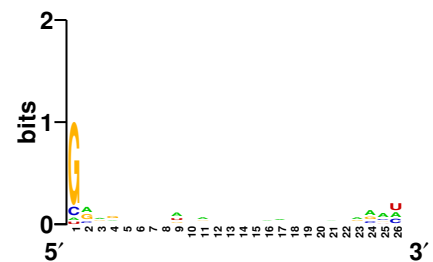

Antisense reads:

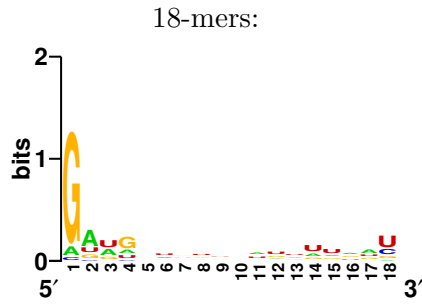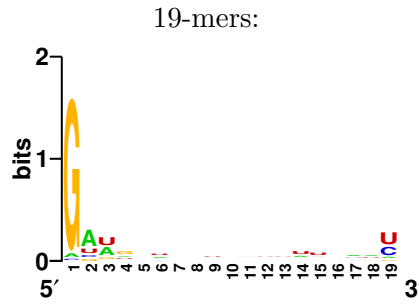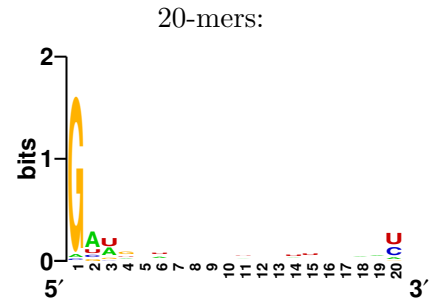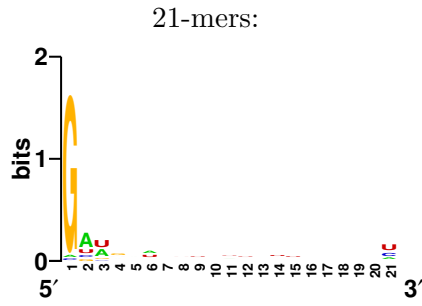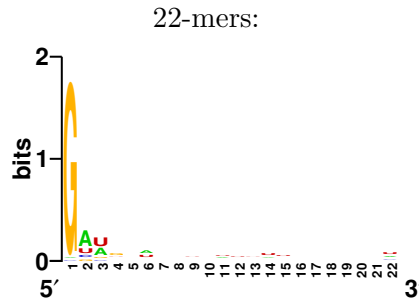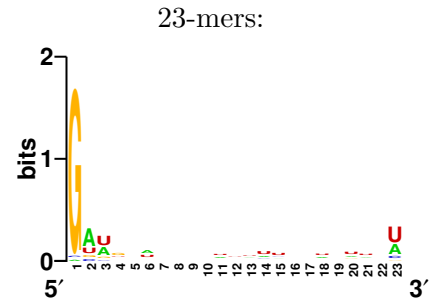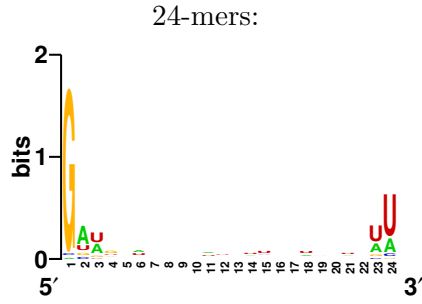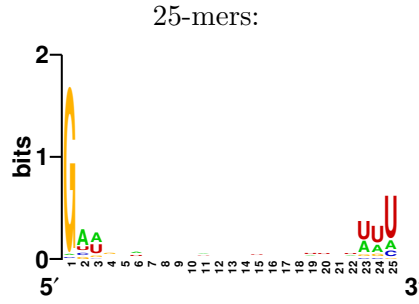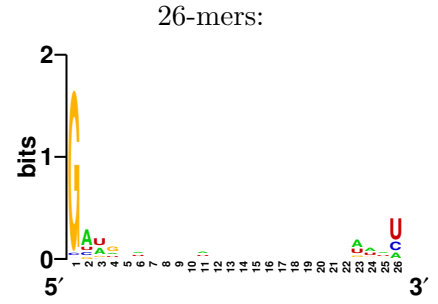

Library GSM455392 (18-26-mers, any number of 5' phosphates, replicate 2):

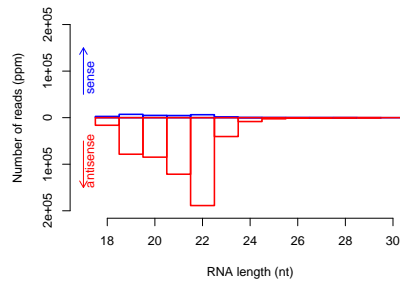

Sense reads:

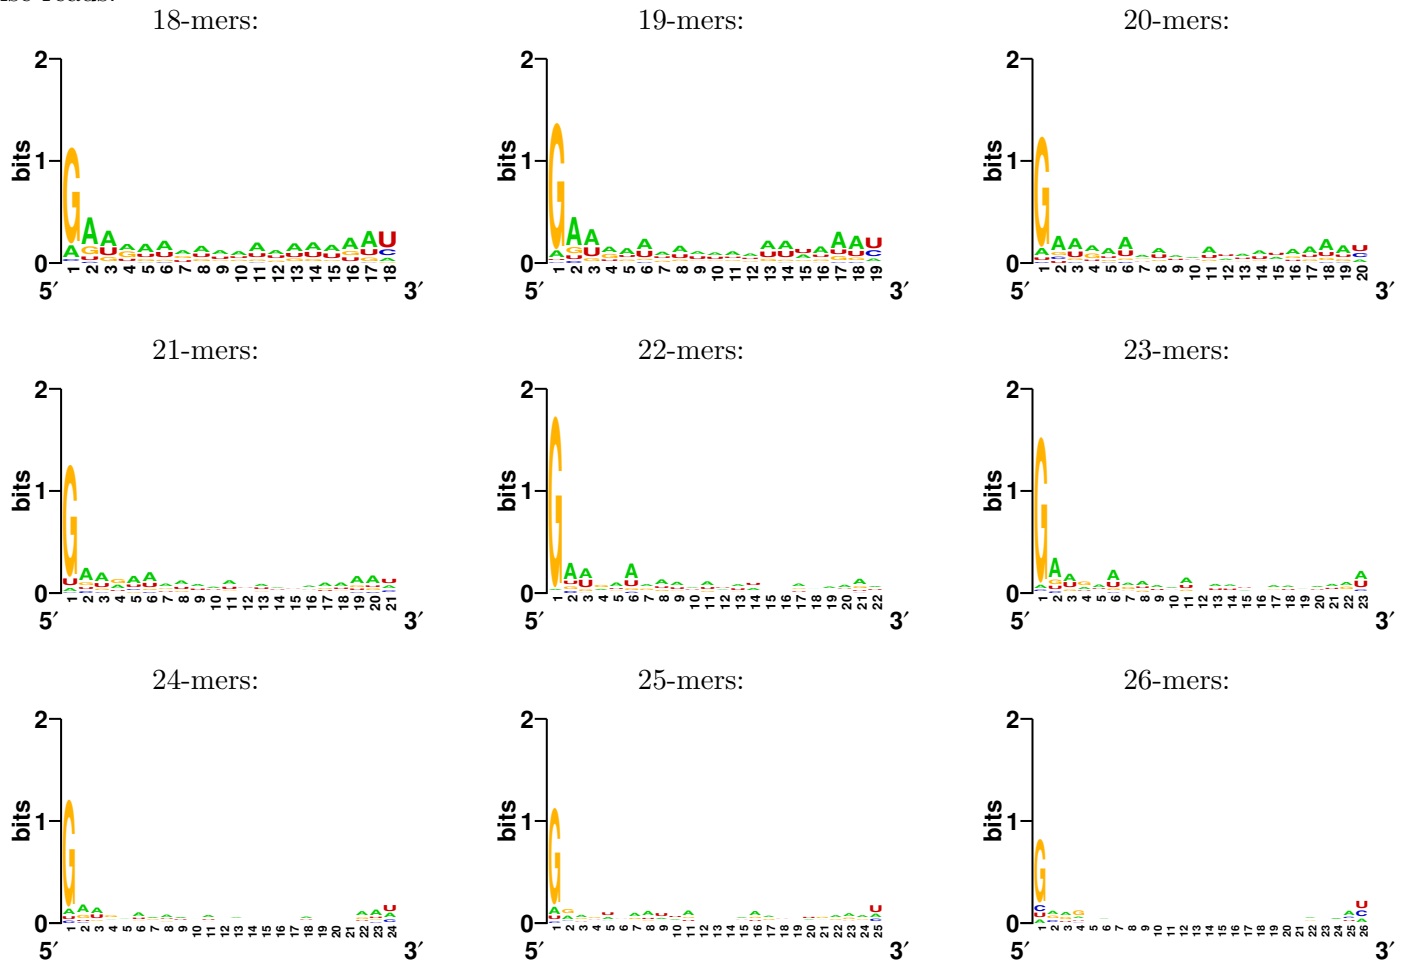

Antisense reads:

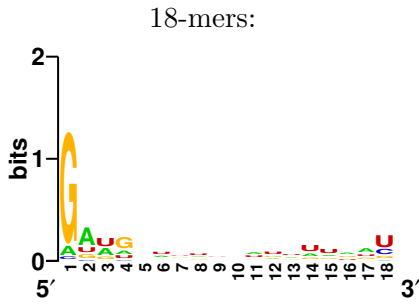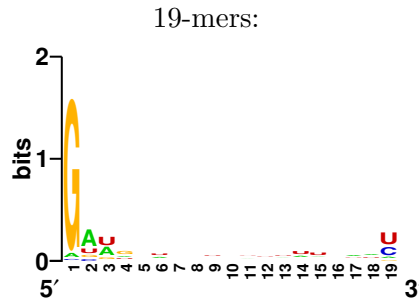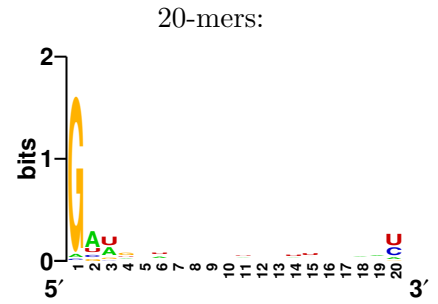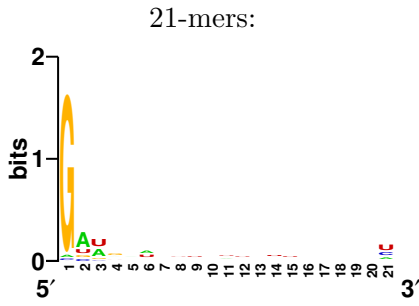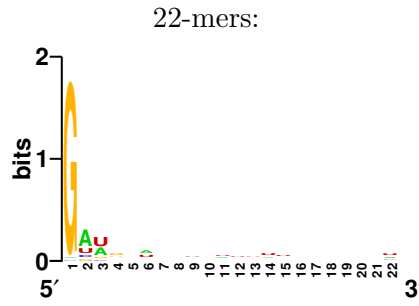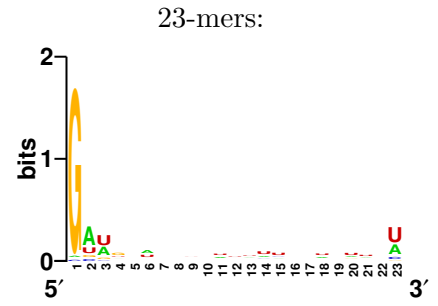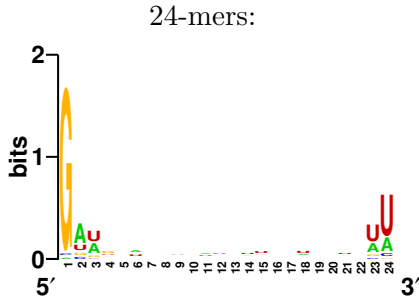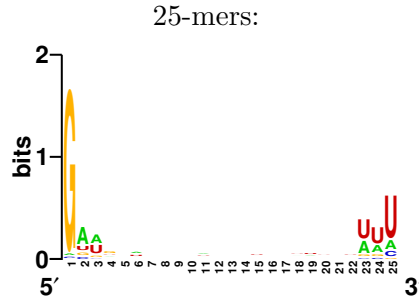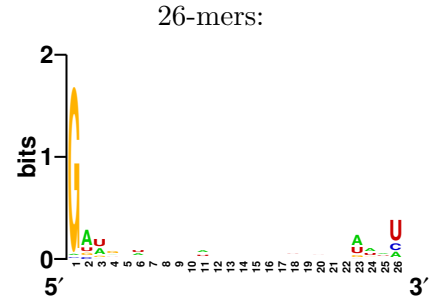

Library GSM455393 (18-26-mers, any number of 5' phosphates, replicate 3):

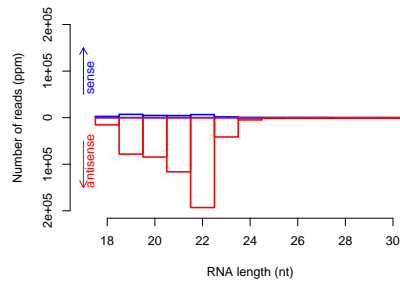

Sense reads:

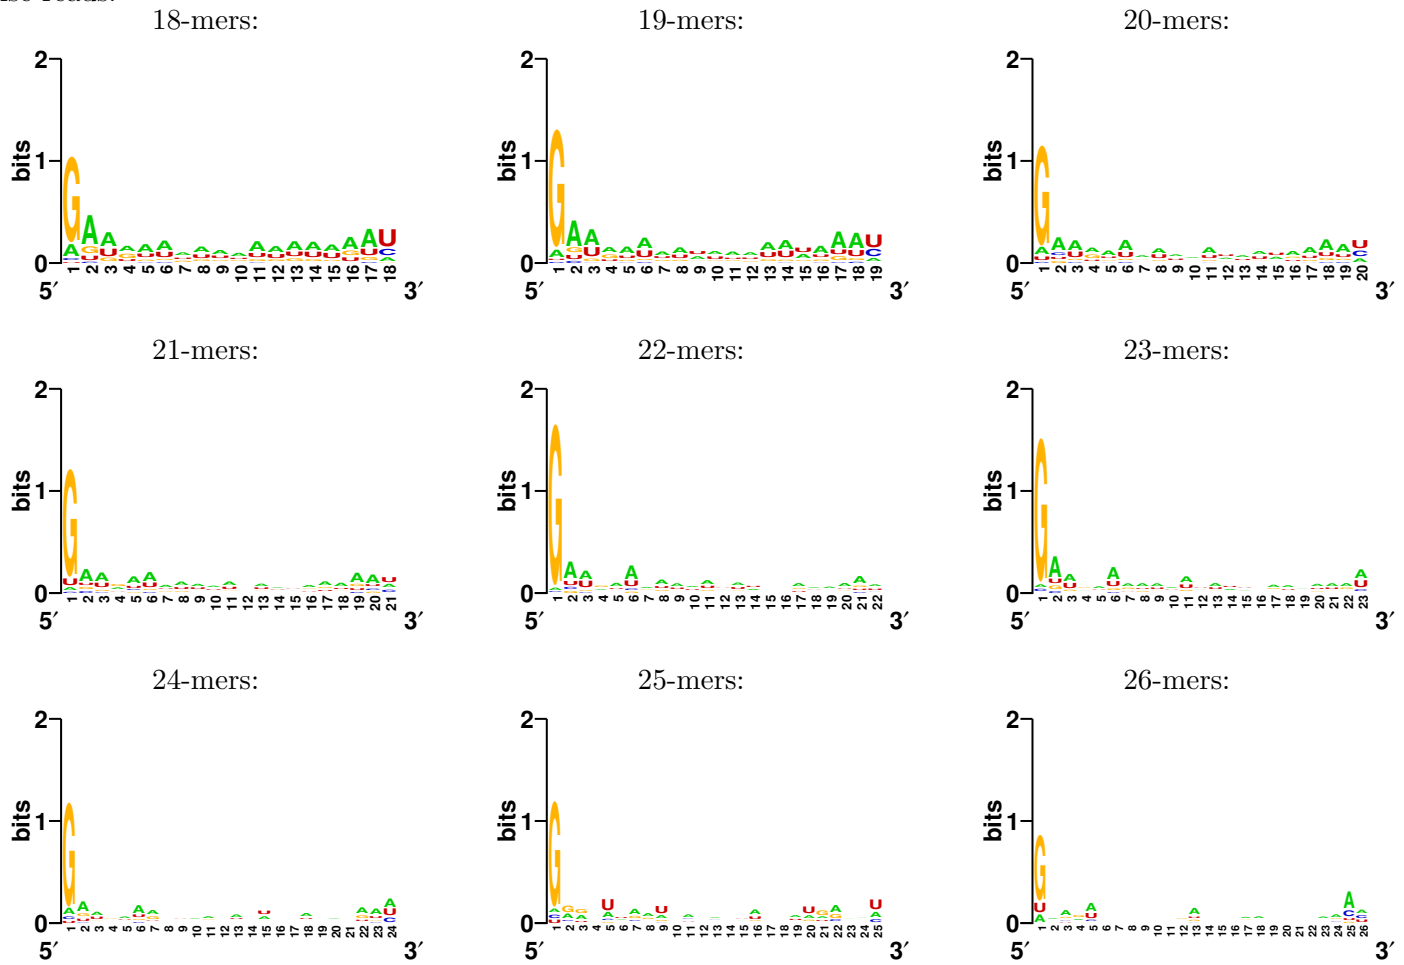



Antisense reads:

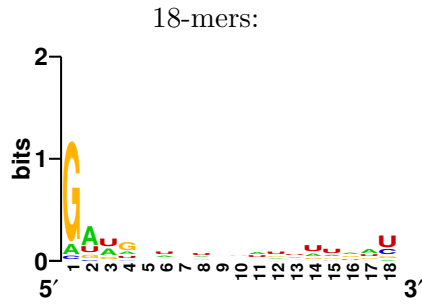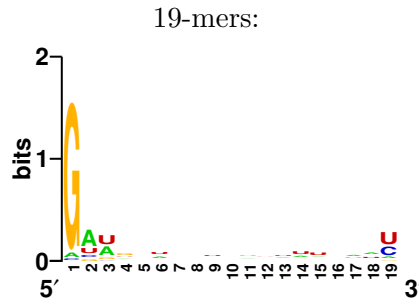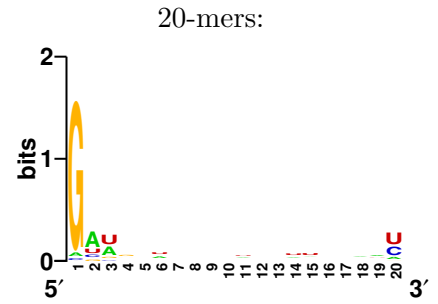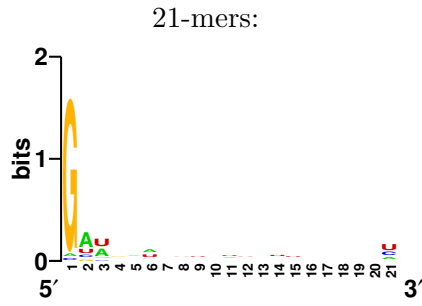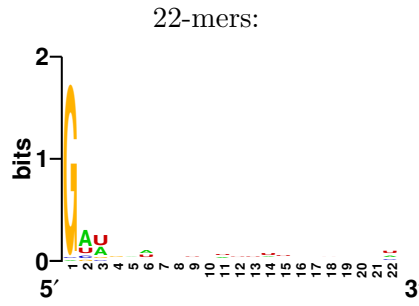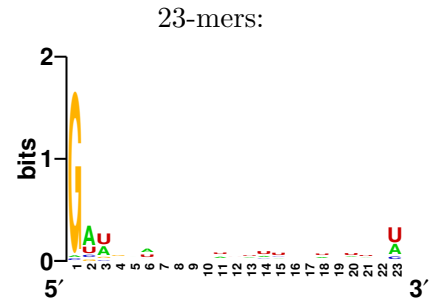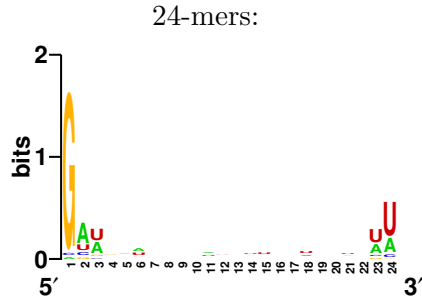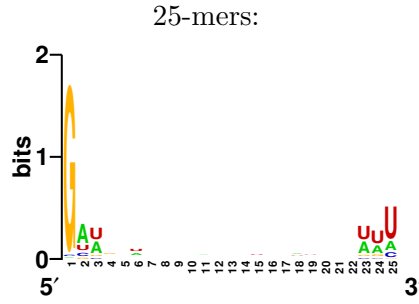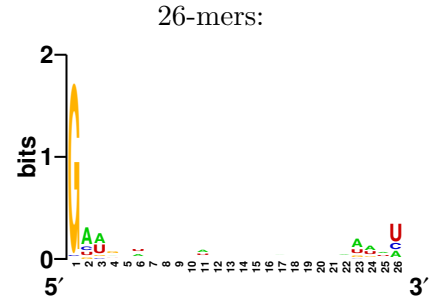

## 6.4 Reads matching RNAs with long ORF's

Library GSM455391 (18-26-mers, any number of 5' phosphates, replicate 1):

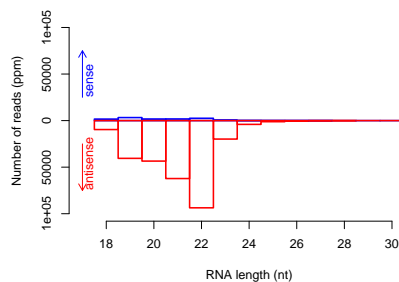

Sense reads:

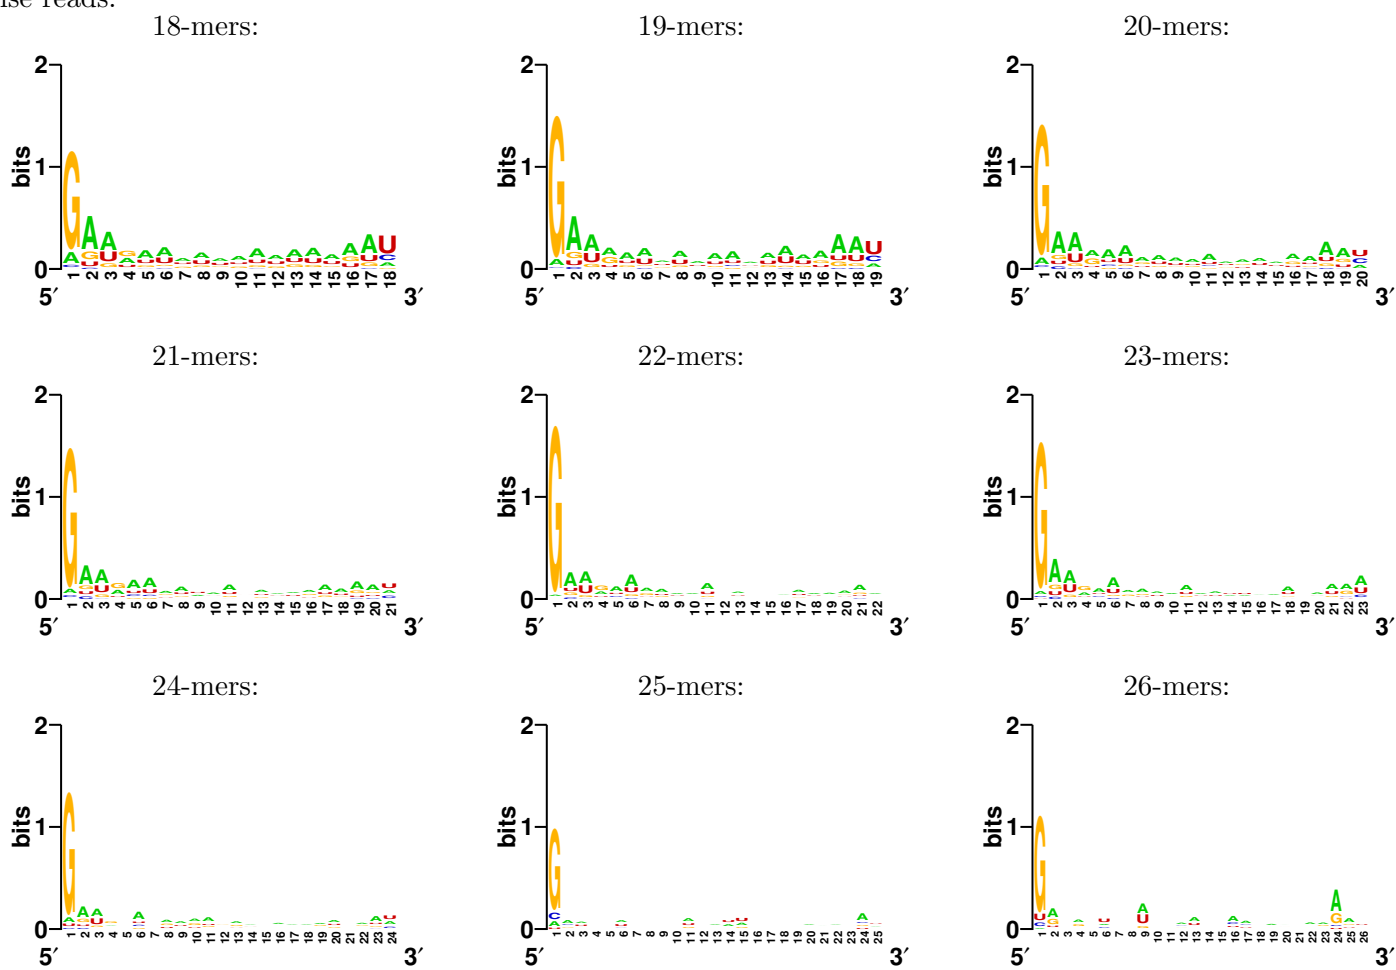

Antisense reads:

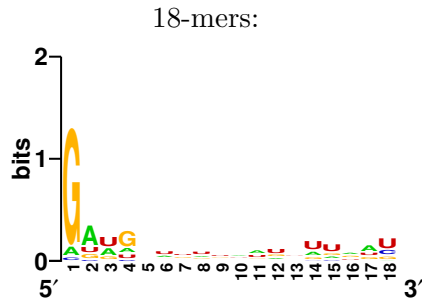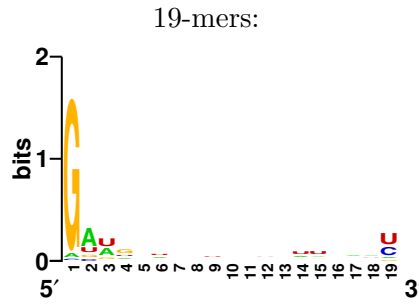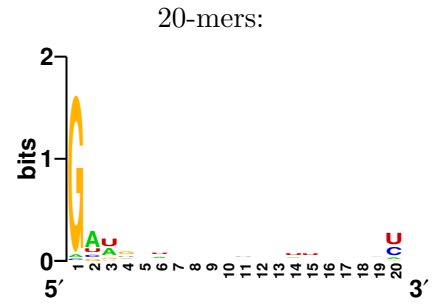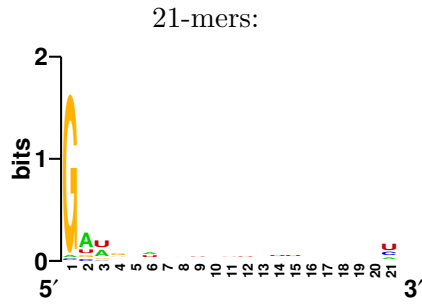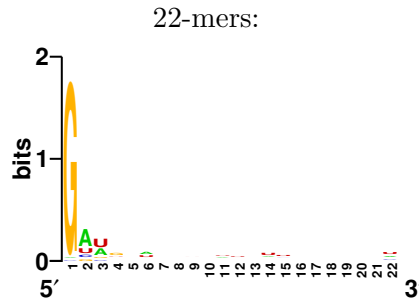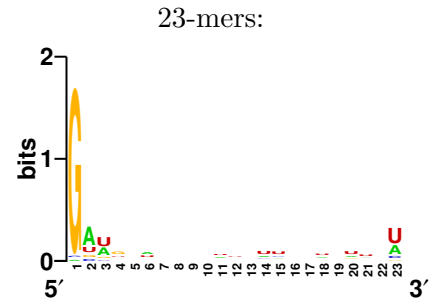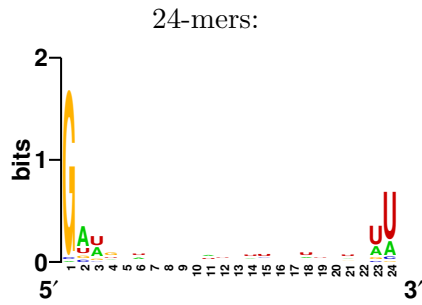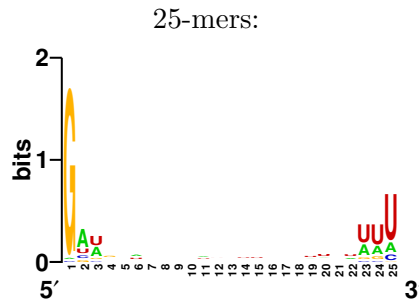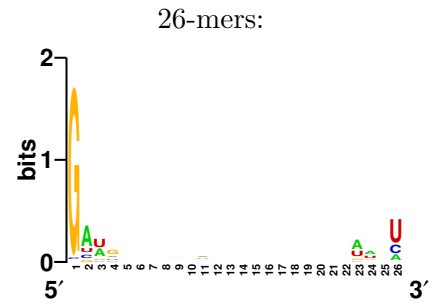

Library GSM455392 (18-26-mers, any number of 5' phosphates, replicate 2):

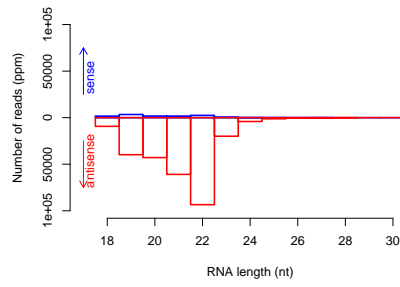

Sense reads:

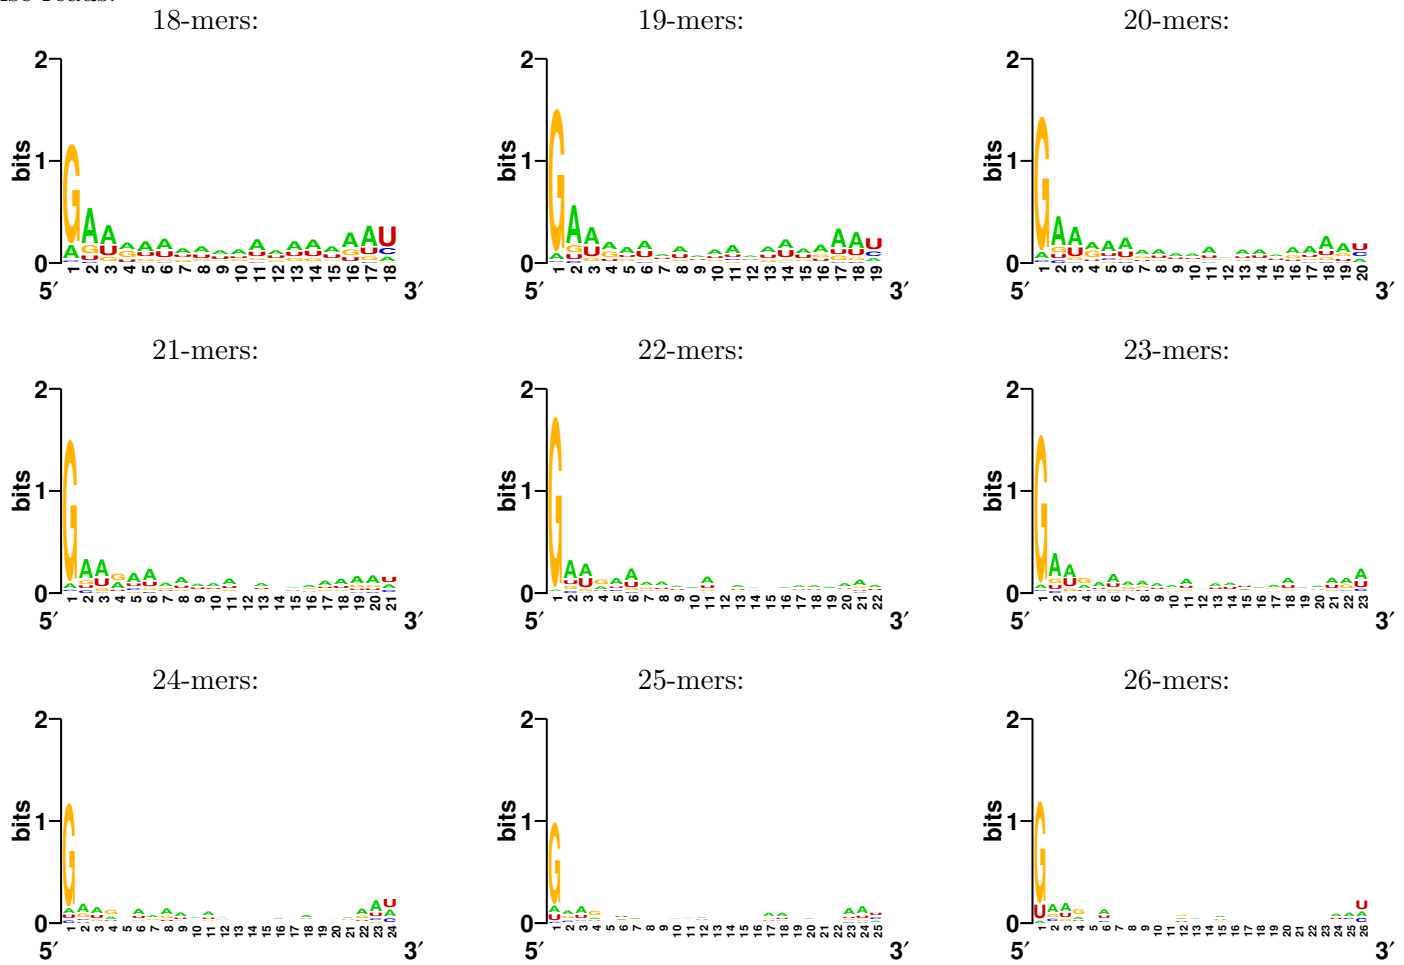

Antisense reads:

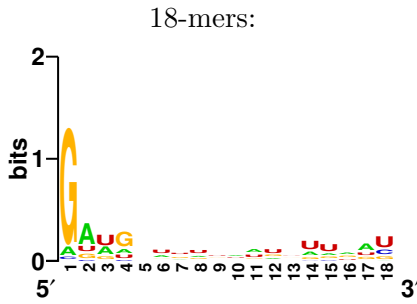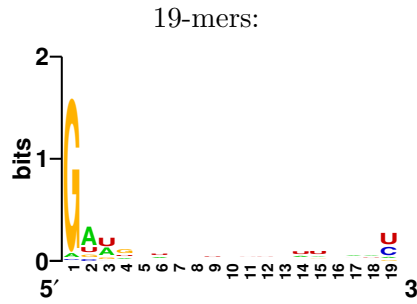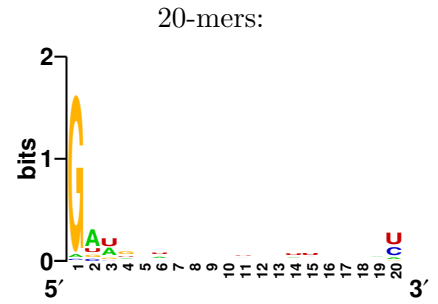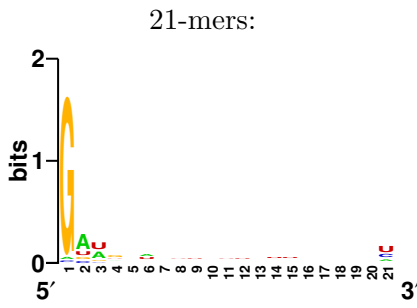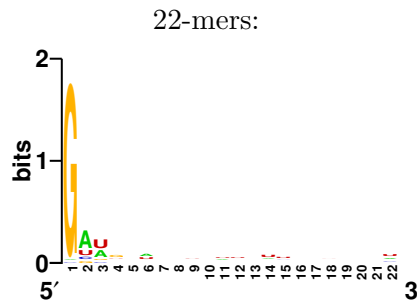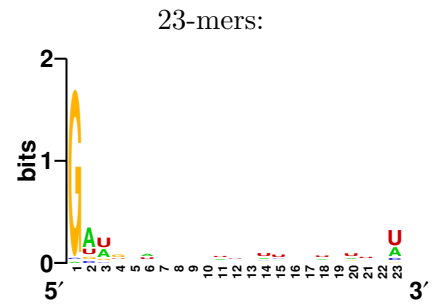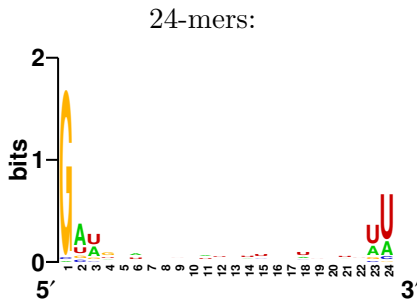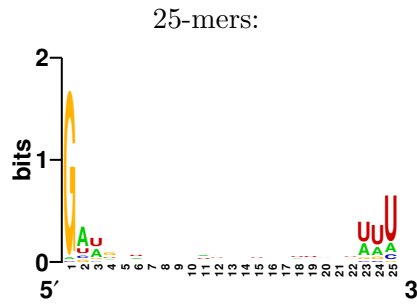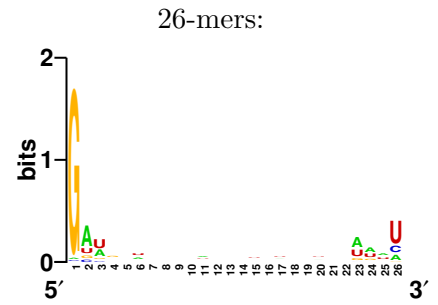

Library GSM455393 (18-26-mers, any number of 5' phosphates, replicate 3):

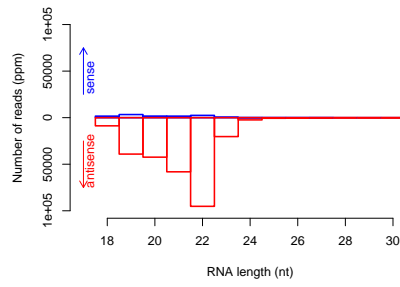

Sense reads:

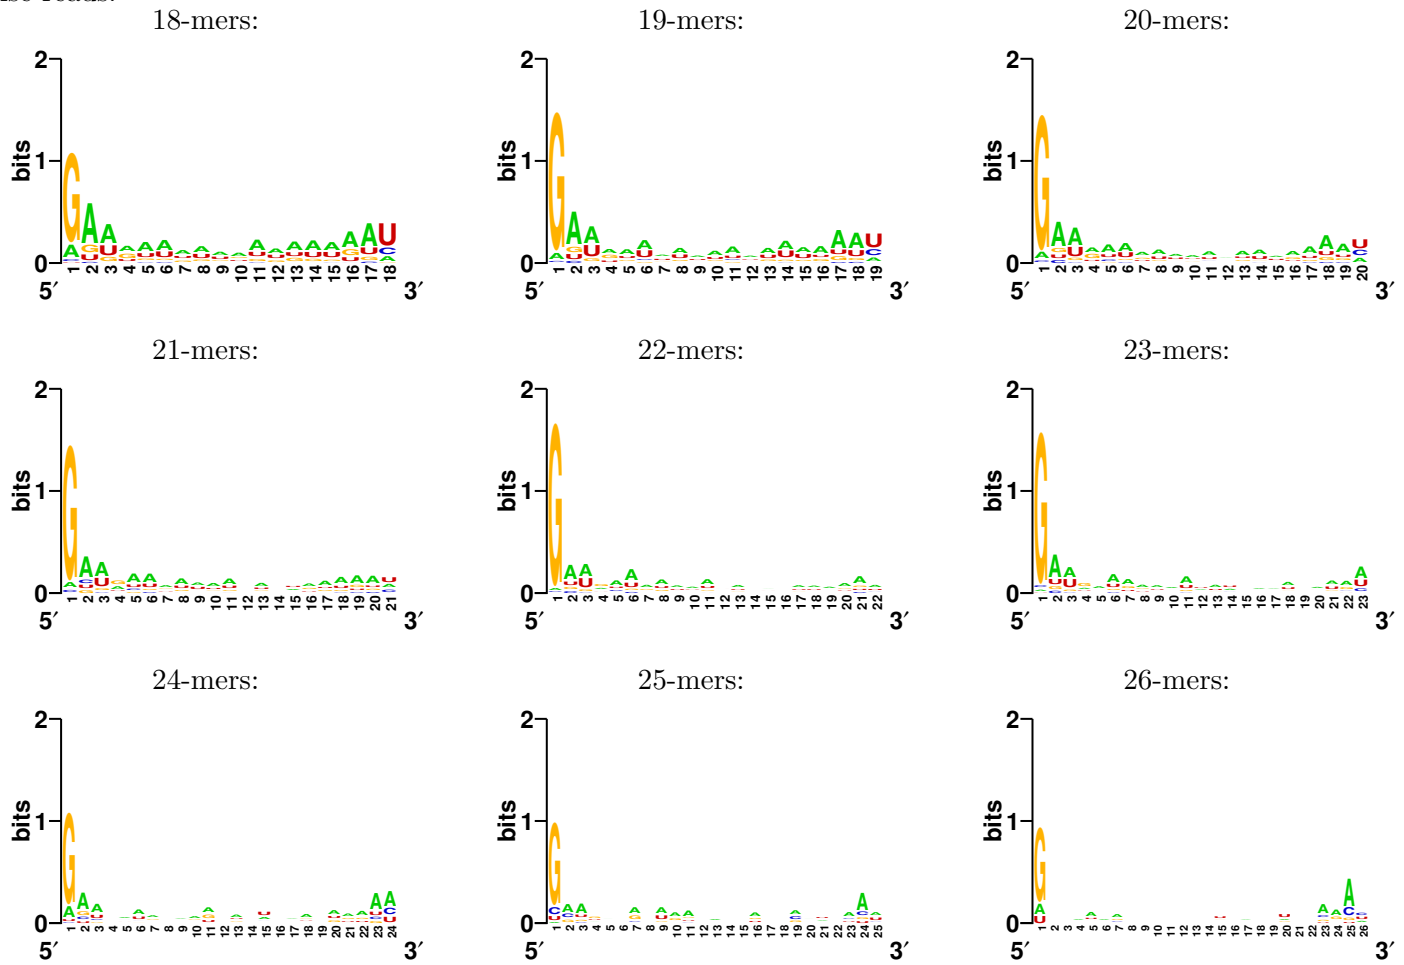

Antisense reads:

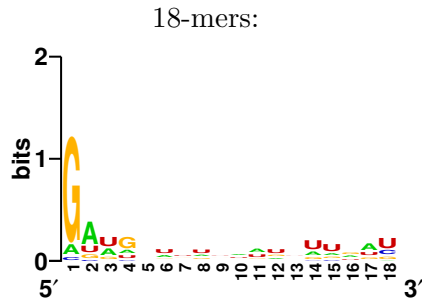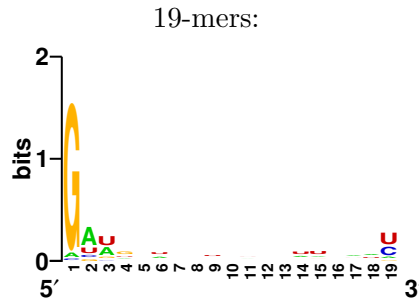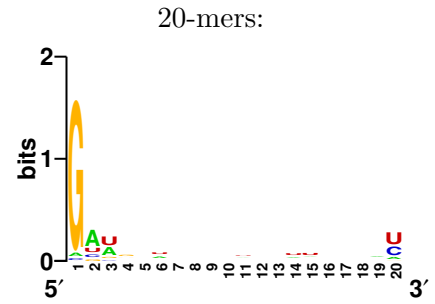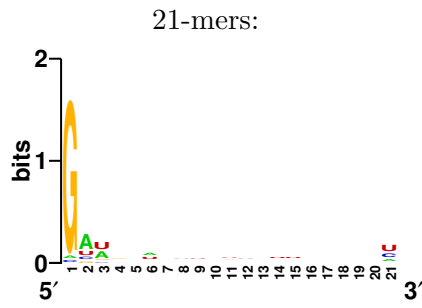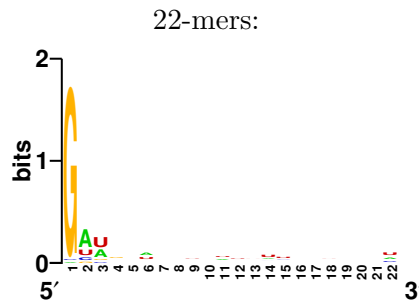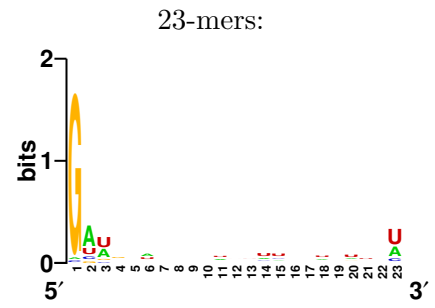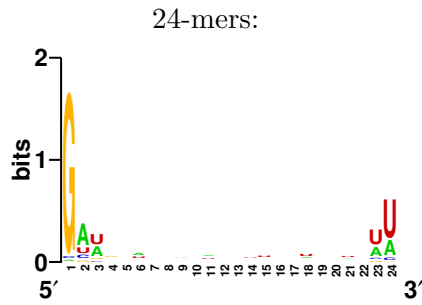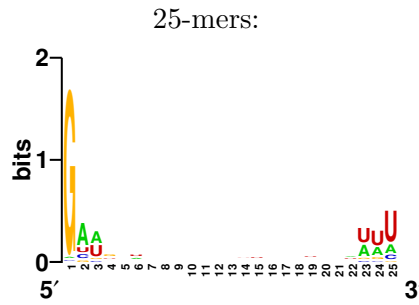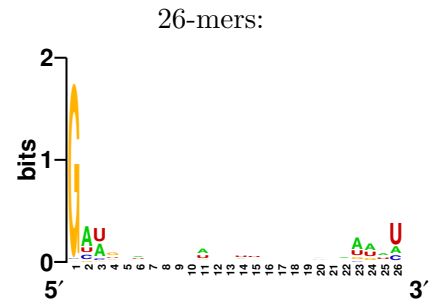

## 6.5 Extragenomic and extratranscriptomic reads

Library GSM455391 (18-26-mers, any number of 5' phosphates, replicate 1):

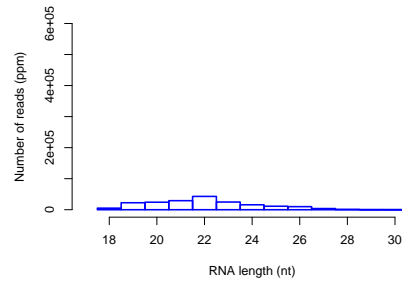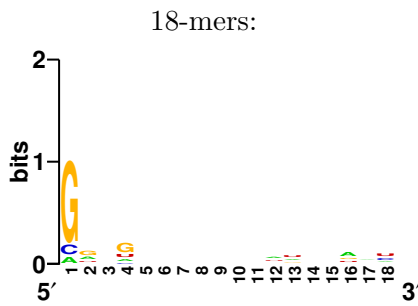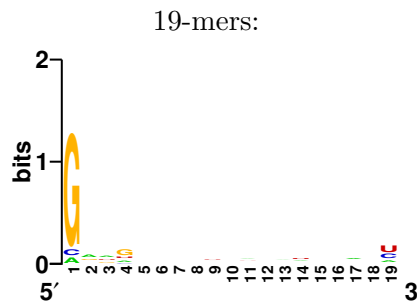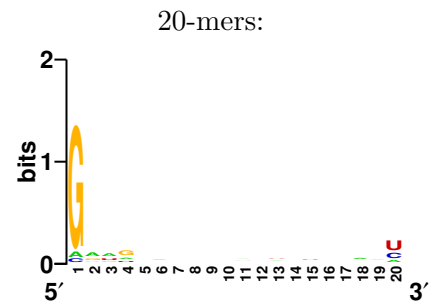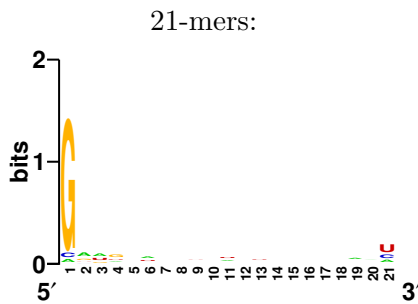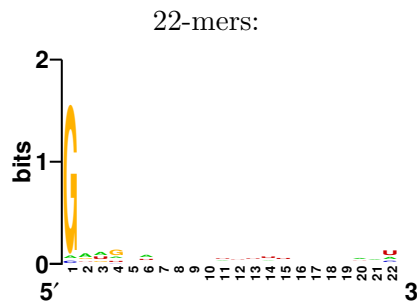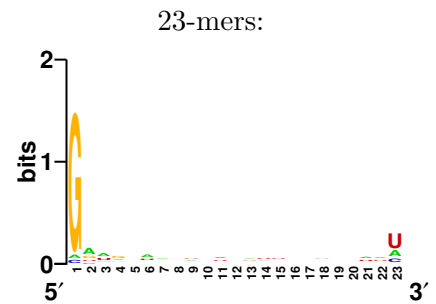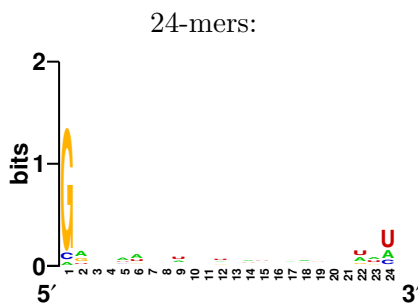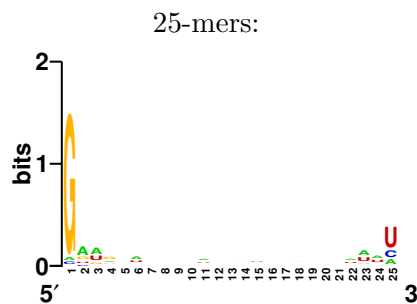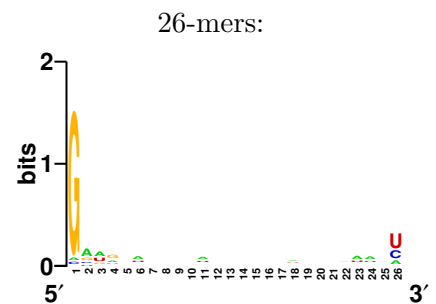



Library GSM455392 (18-26-mers, any number of 5' phosphates, replicate 2):

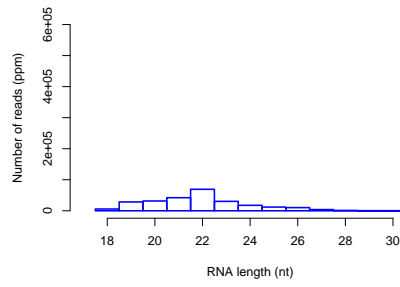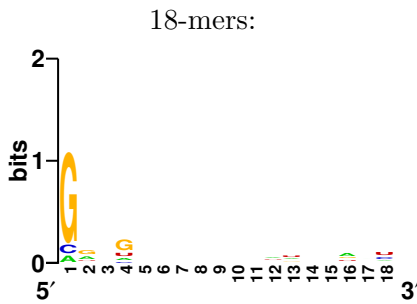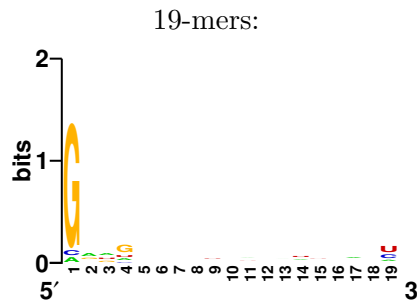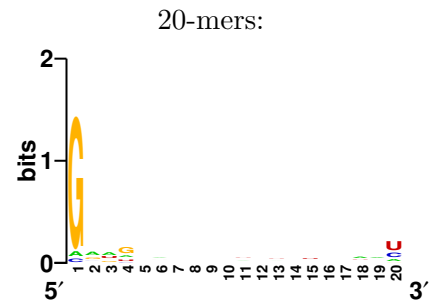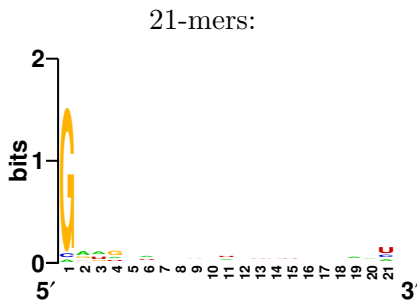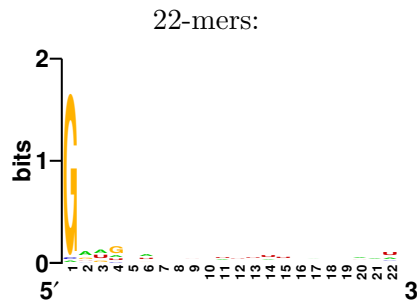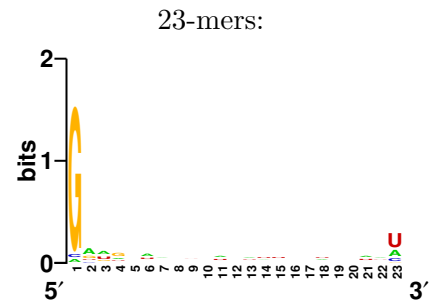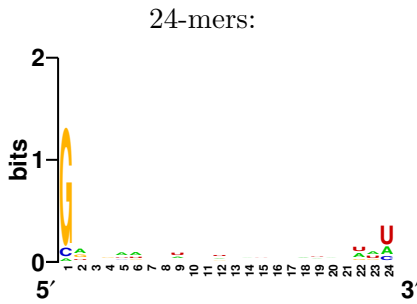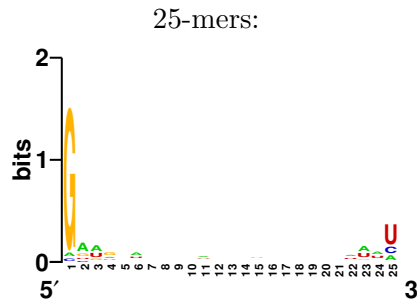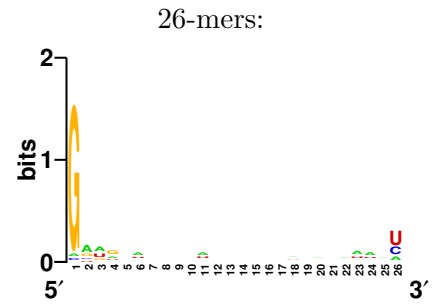

Library GSM455393 (18-26-mers, any number of 5' phosphates, replicate 3):

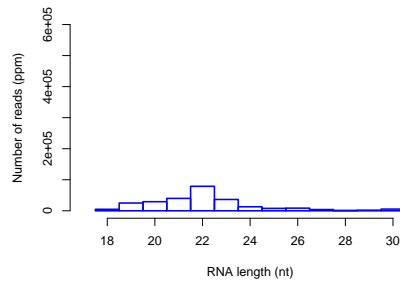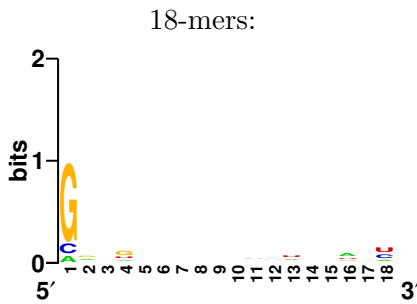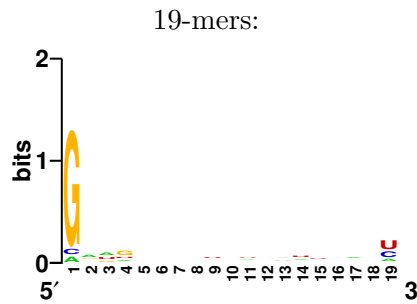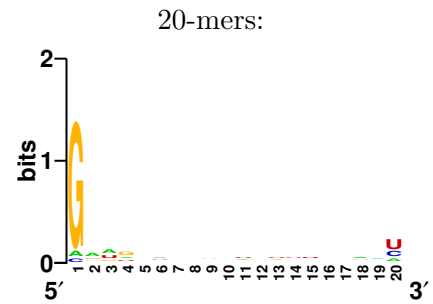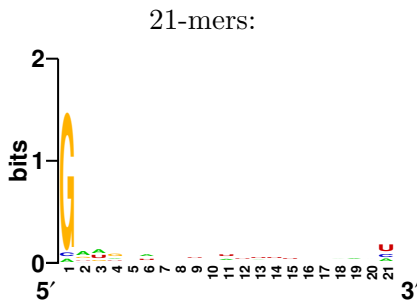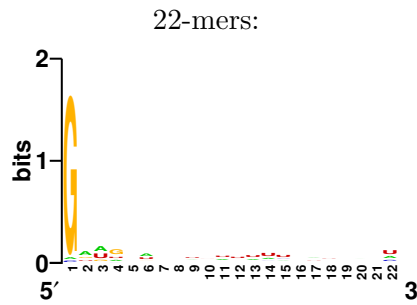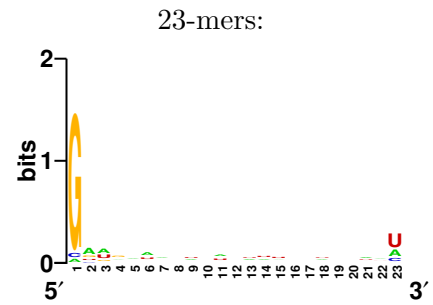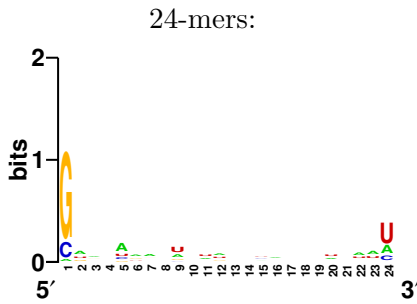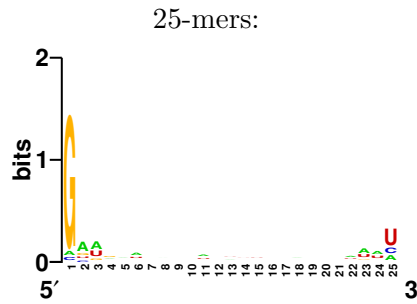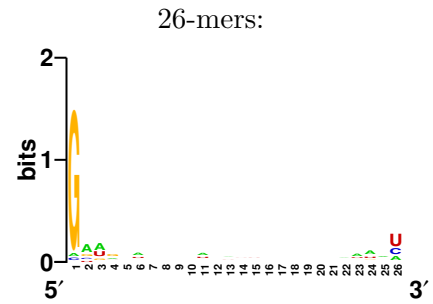

## 6.6 Extragenomic reads matching the transcriptome

Library GSM455391 (18-26-mers, any number of 5' phosphates, replicate 1):

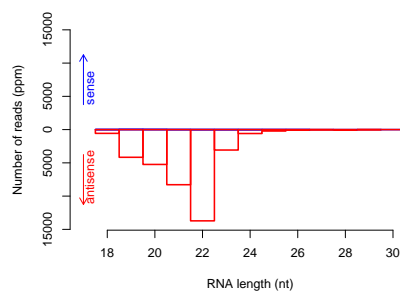

Sense reads:

18-mers:

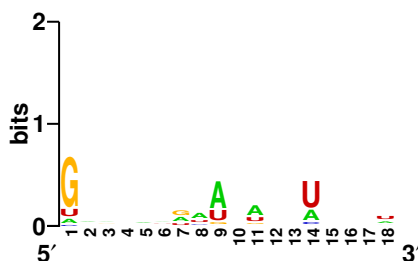

19-mers:

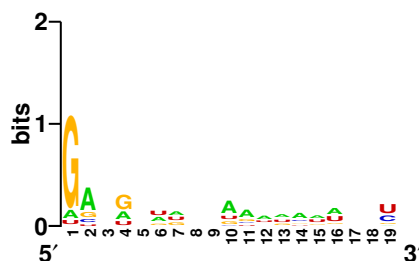

20-mers:

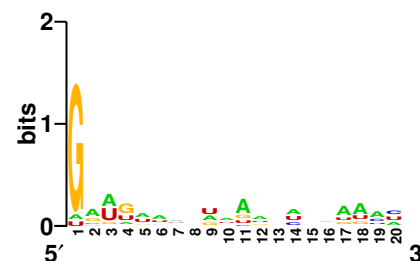

21-mers:

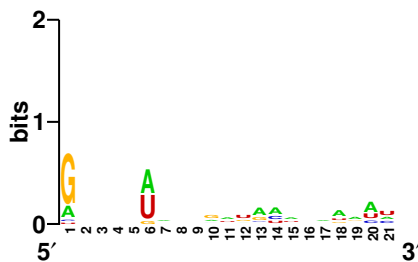

22-mers:

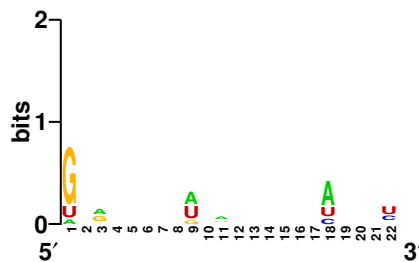

23-mers:

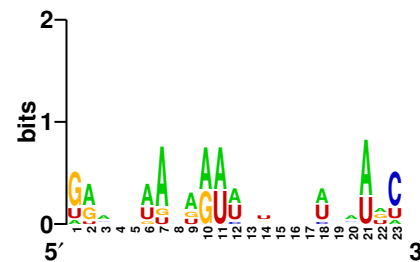

24-mers:

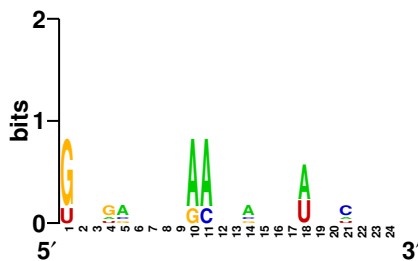

25-mers:

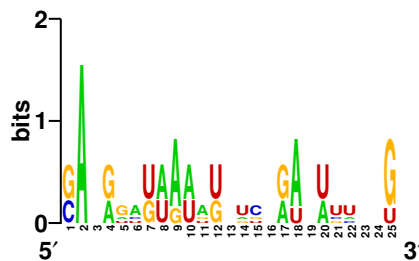

26-mers:

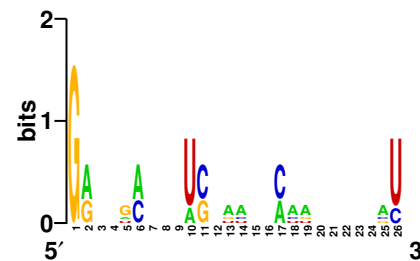

Antisense reads:

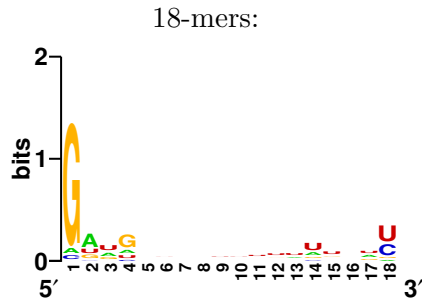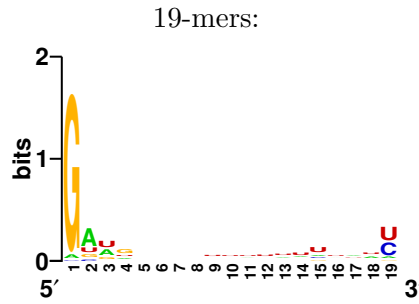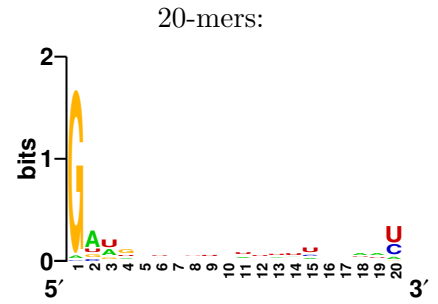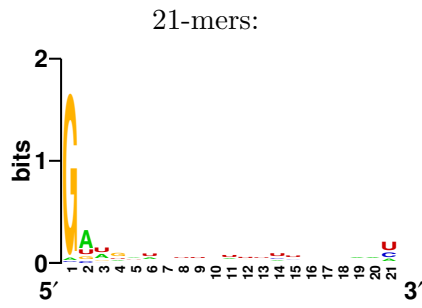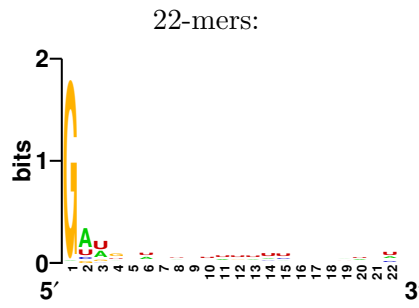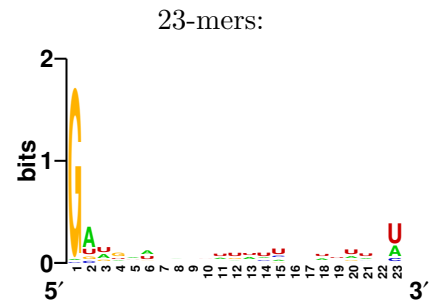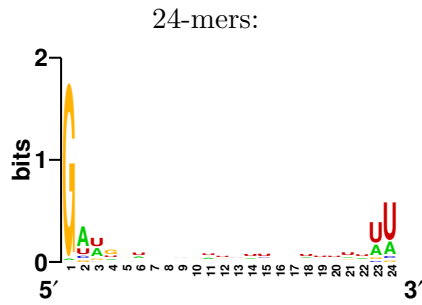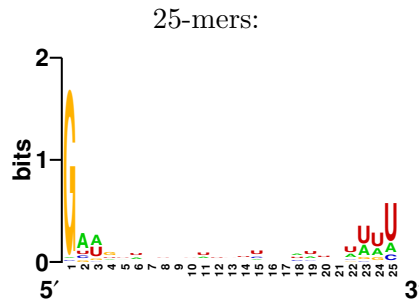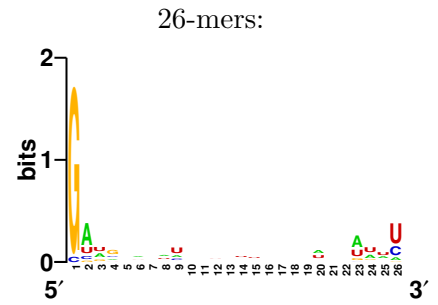

Library GSM455392 (18-26-mers, any number of 5' phosphates, replicate 2):

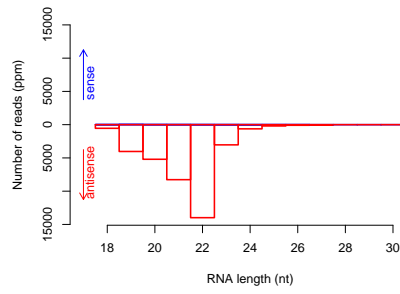

Sense reads:

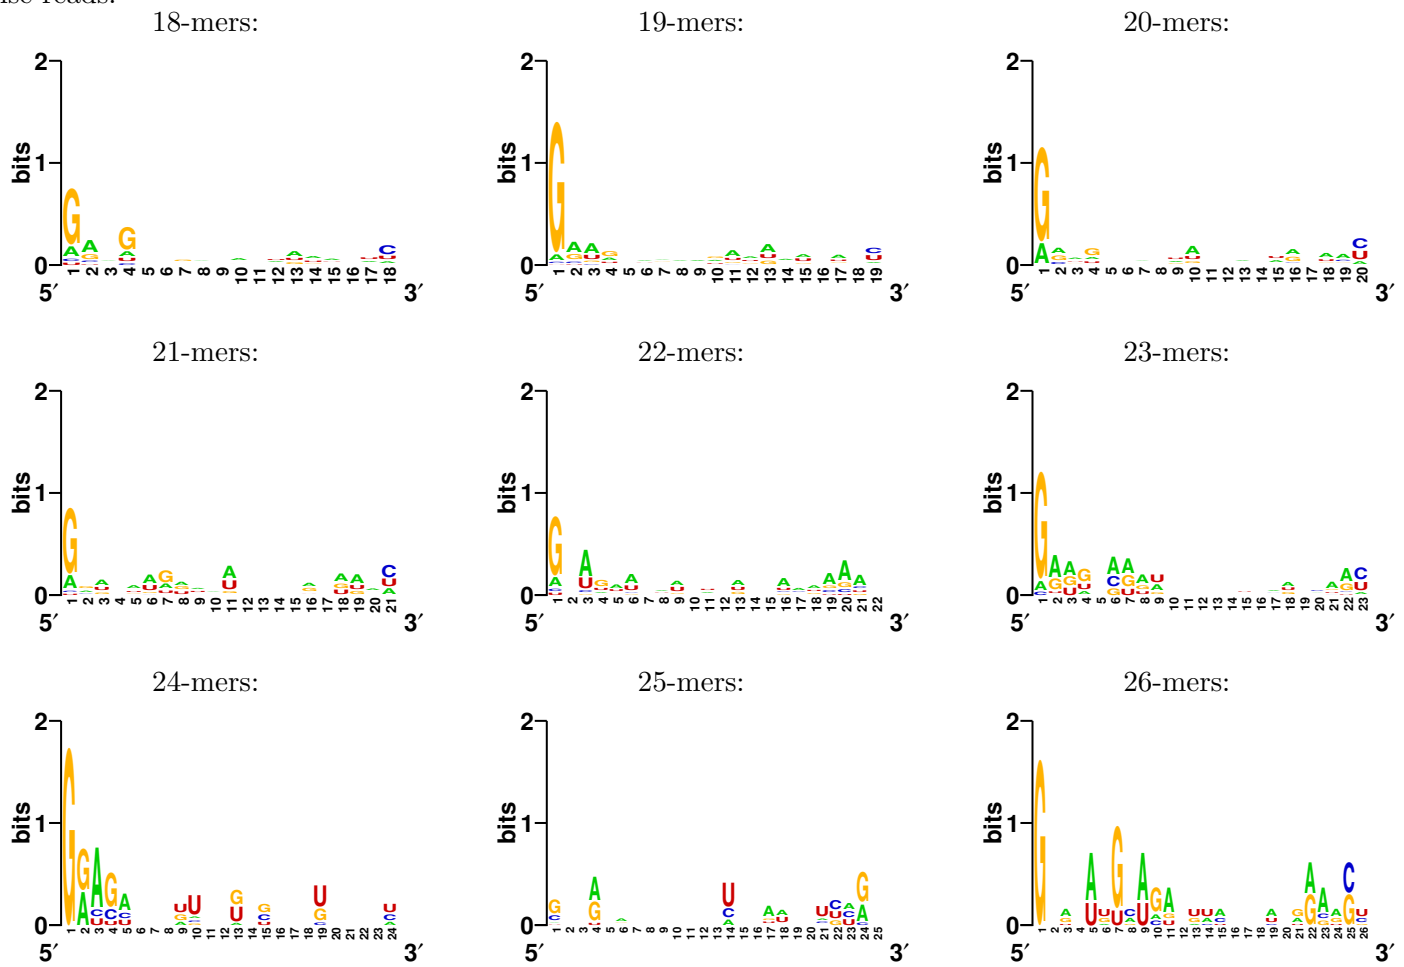

Antisense reads:

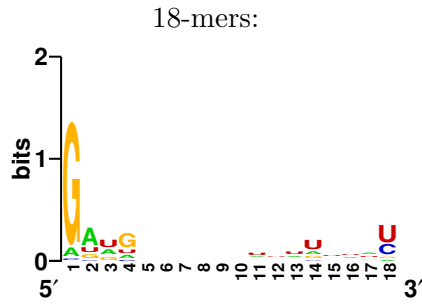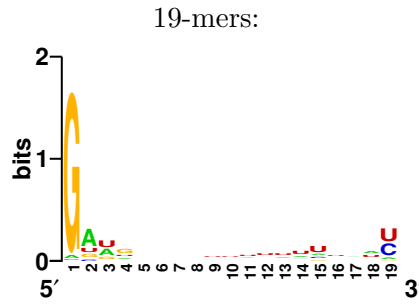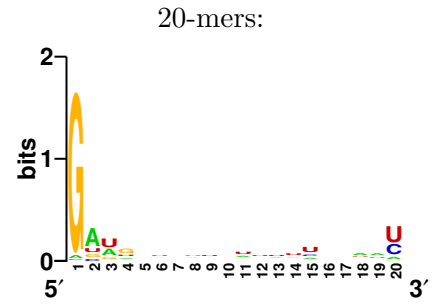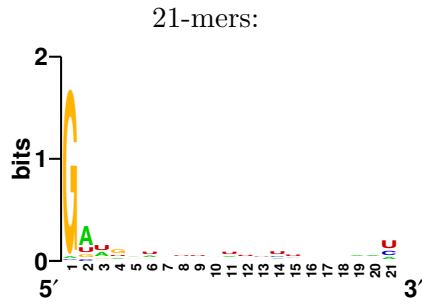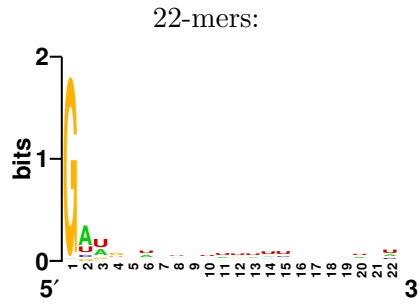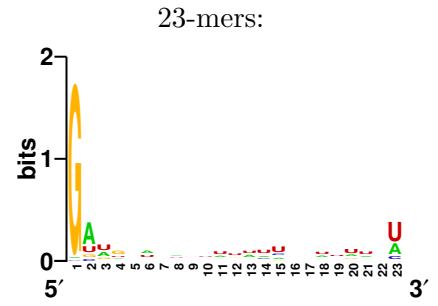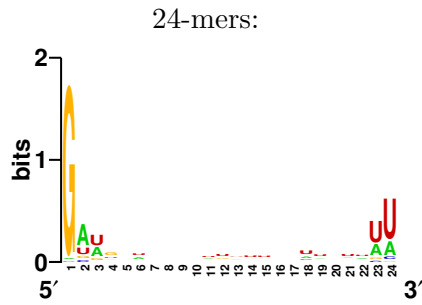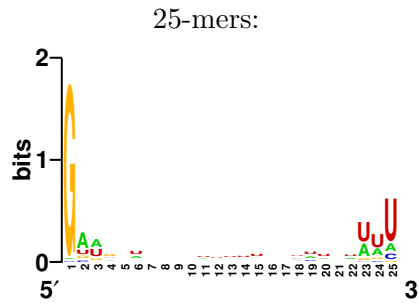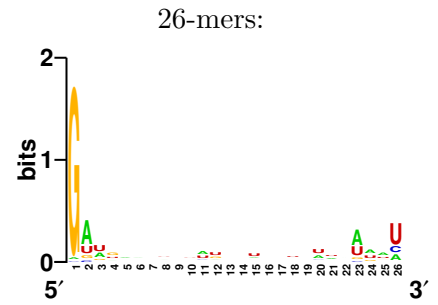

Library GSM455393 (18-26-mers, any number of 5' phosphates, replicate 3):

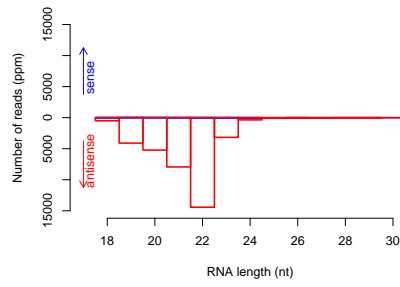

Sense reads:

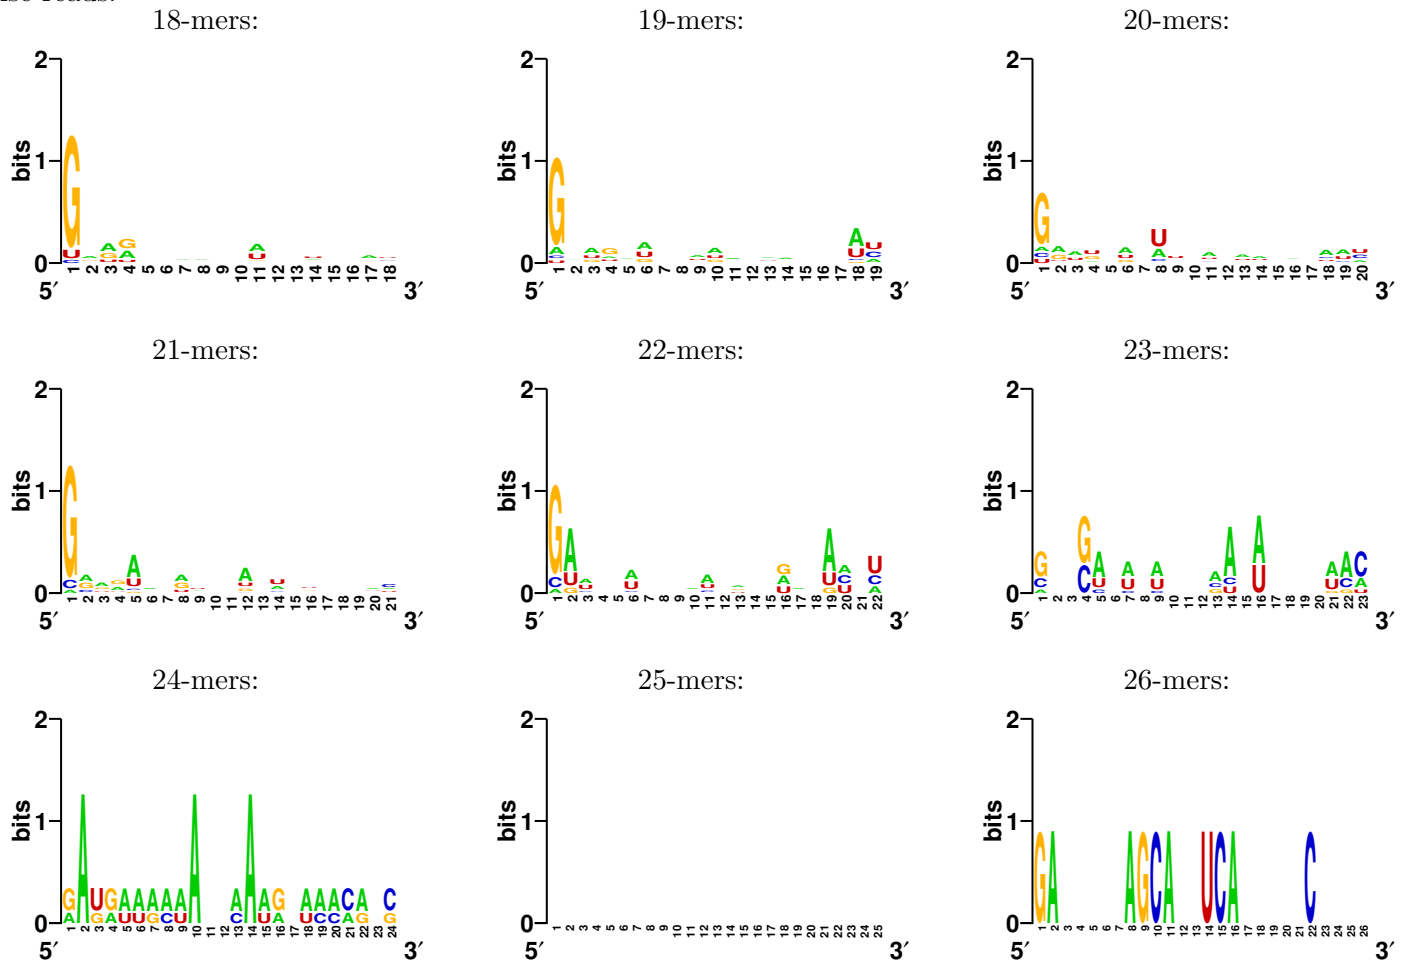

Antisense reads:

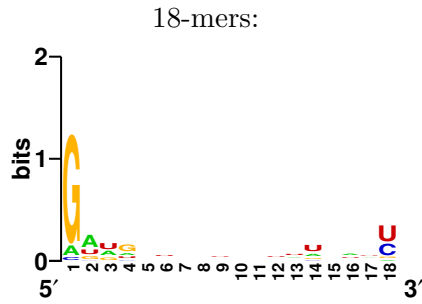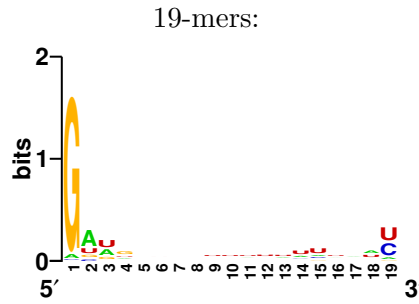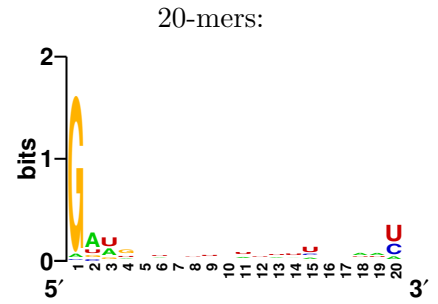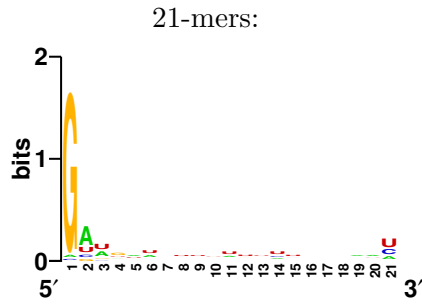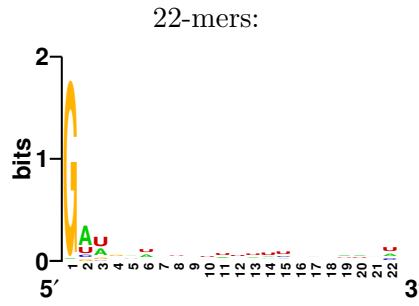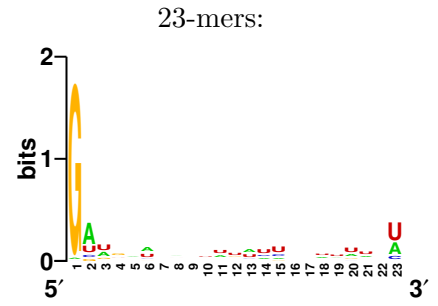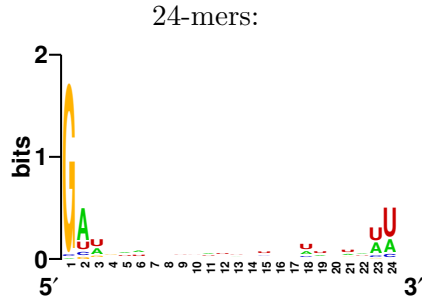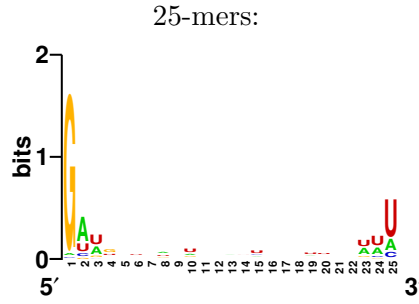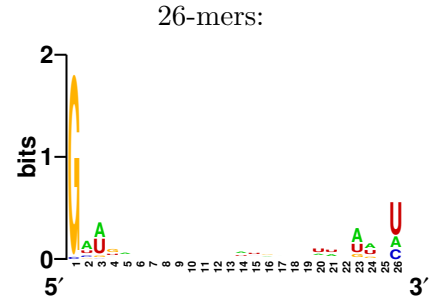



## 7 Extragenomic and extratranscriptomic reads matching the *Staphylococcus aureus* genome

### 7.1 Libraries #1 (total 5' monophosphorylated small RNAs)

Embryo 8h, library 1:

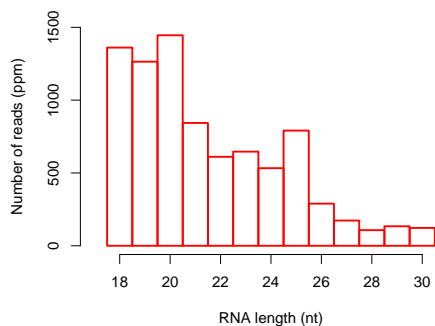

19-mers:

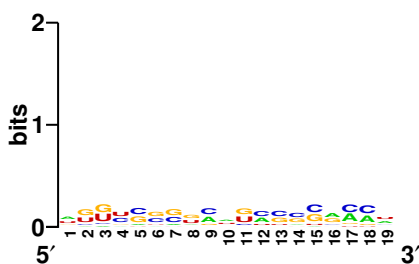

20-mers:

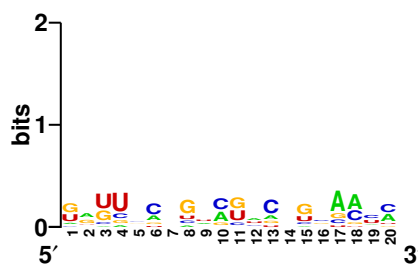

18-mers:

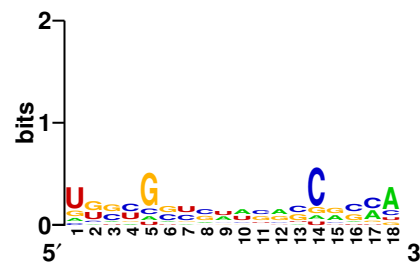

21-mers:

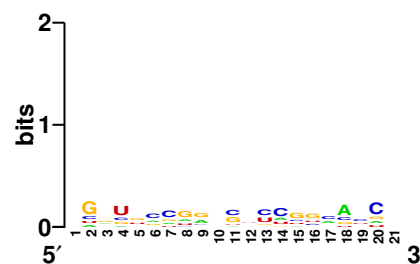

22-mers:

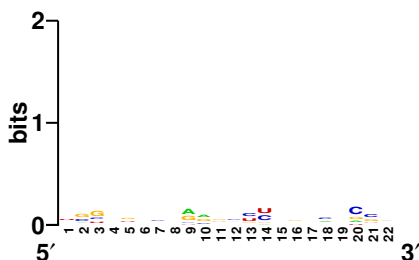

23-mers:

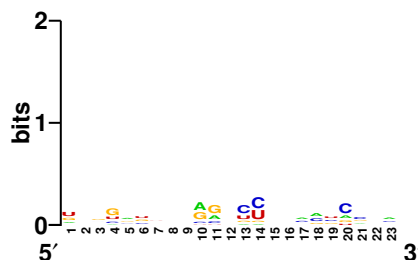

24-mers:

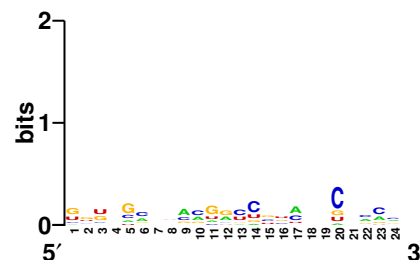

25-mers:

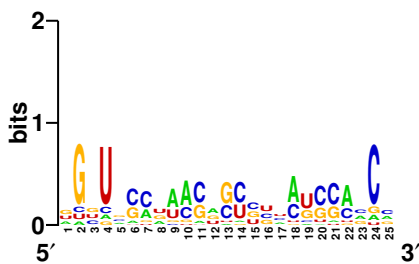

26-mers:

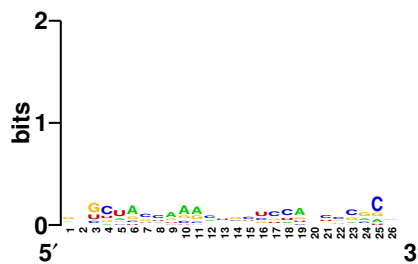

27-mers:

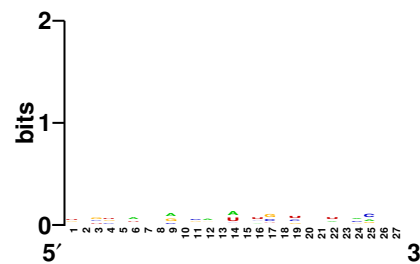

28-mers:

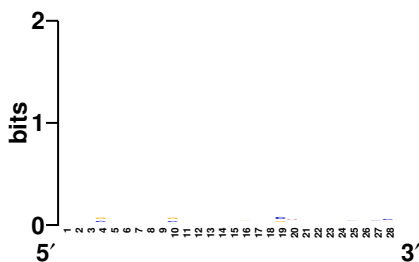

29-mers:

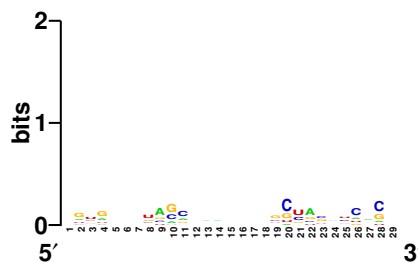

30-mers:

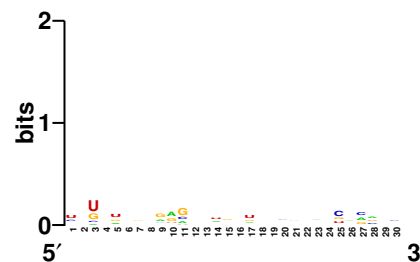

Embryo 15h, library 1:

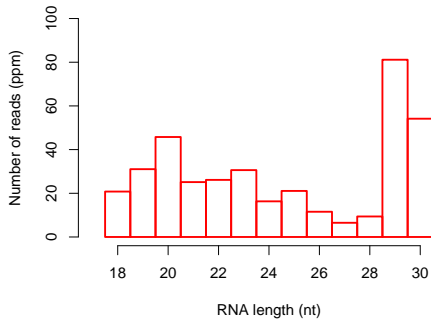

19-mers:

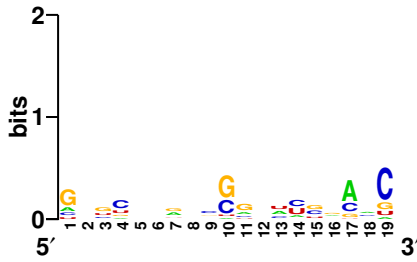

20-mers:

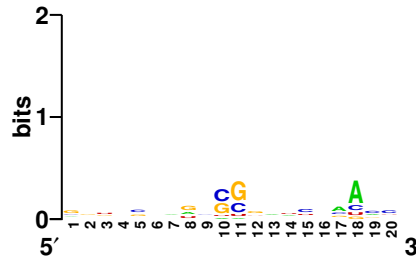

18-mers:

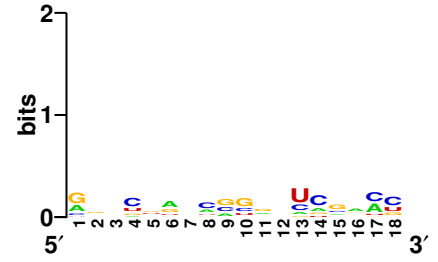

21-mers:

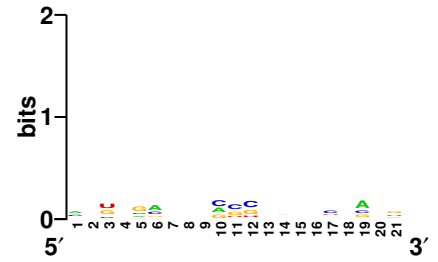

22-mers:

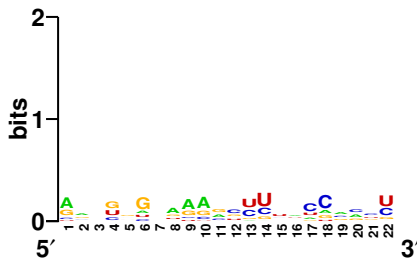

23-mers:

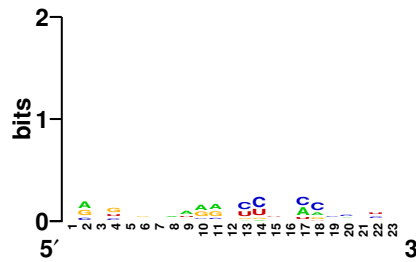

24-mers:

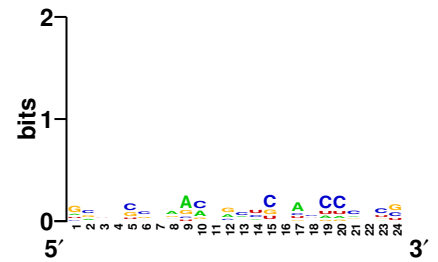

25-mers:

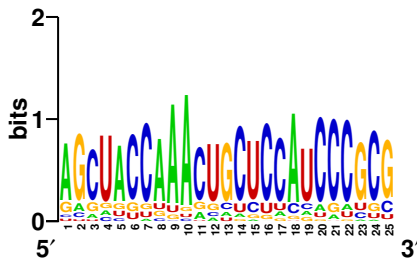

26-mers:

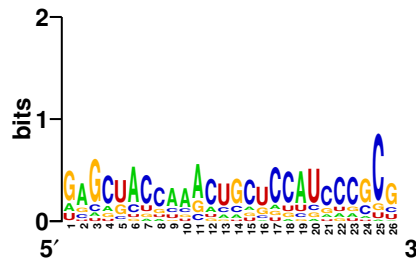

27-mers:

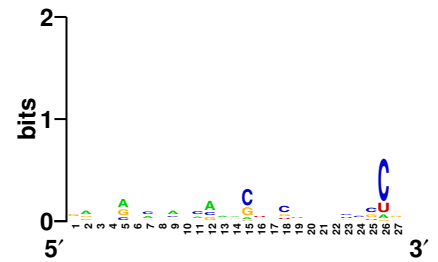

28-mers:

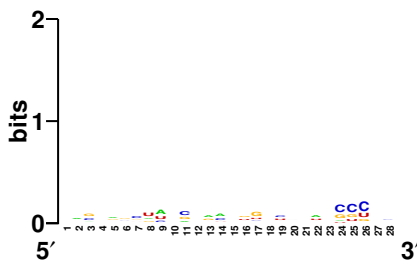

29-mers:

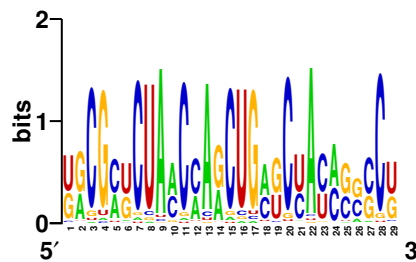

30-mers:

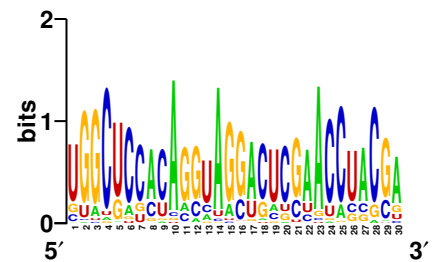

Embryo 36h, library 1:

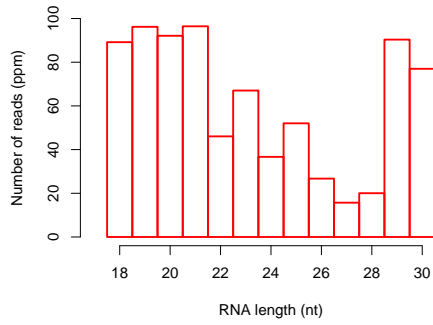

19-mers:

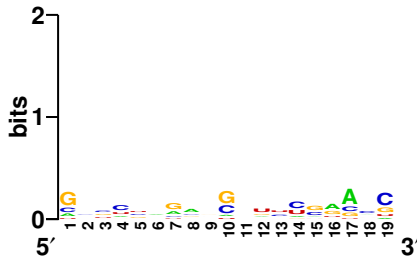

20-mers:

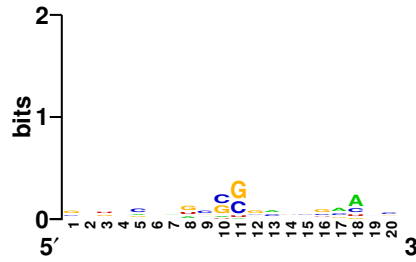

18-mers:

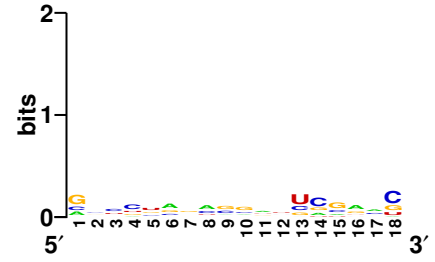

21-mers:

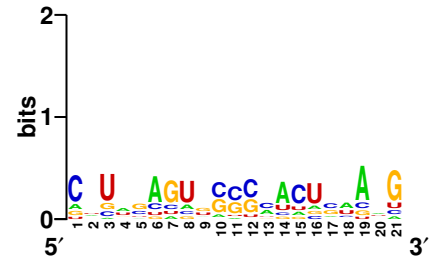

22-mers:

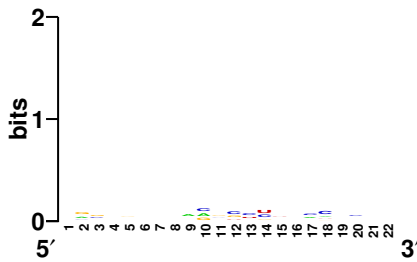

23-mers:

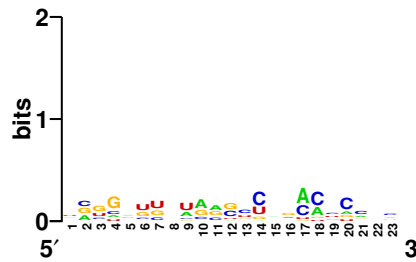

24-mers:

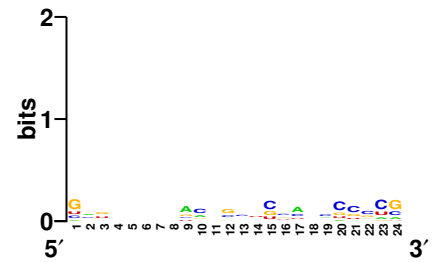

25-mers:

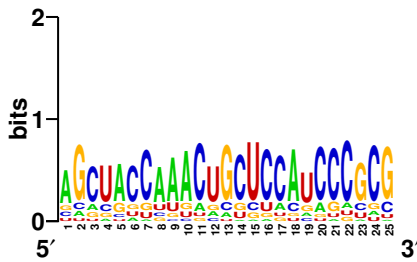

26-mers:

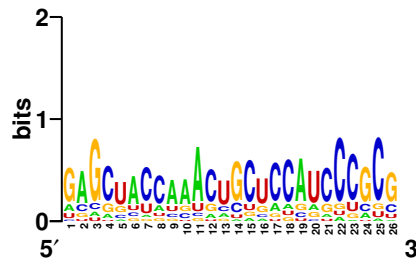

27-mers:

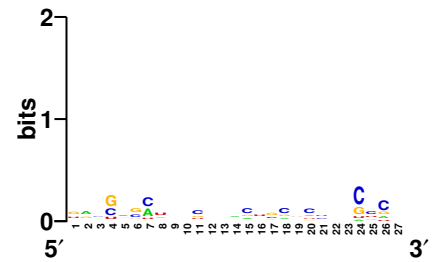

28-mers:

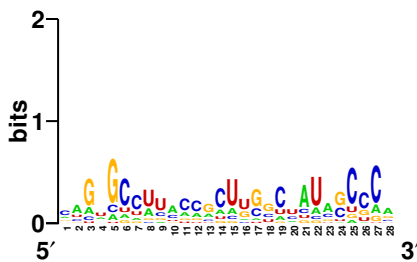

29-mers:

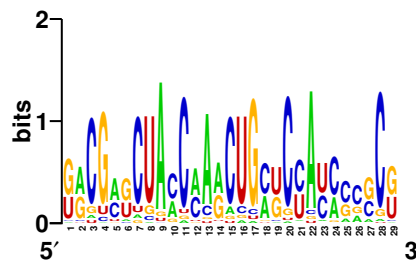

30-mers:

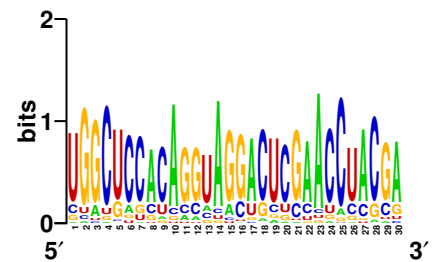

Embryo 60h, library 1:

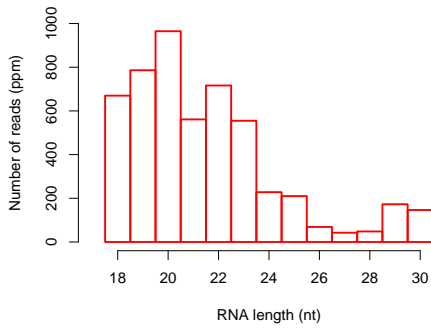

19-mers:

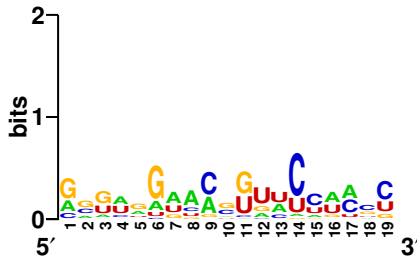

20-mers:

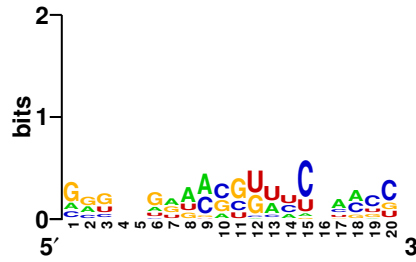

18-mers:

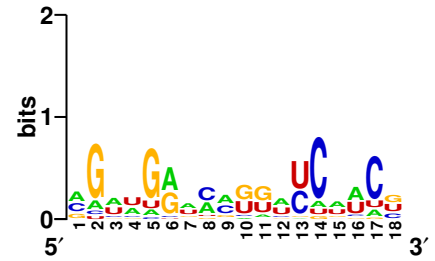

21-mers:

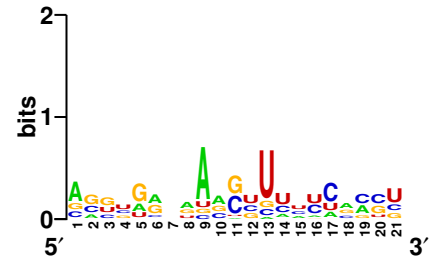

22-mers:

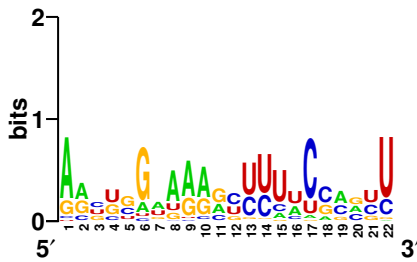

23-mers:

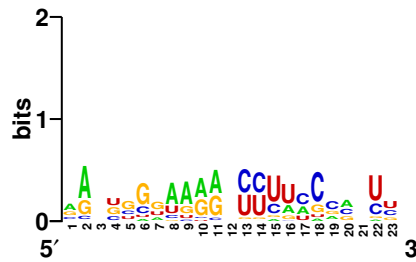

24-mers:

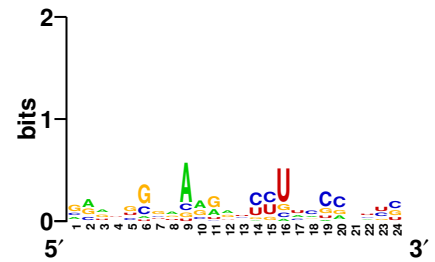

25-mers:

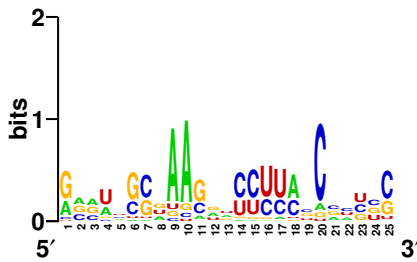

26-mers:

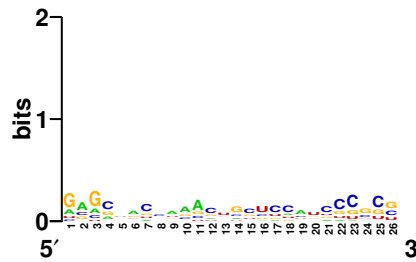

27-mers:

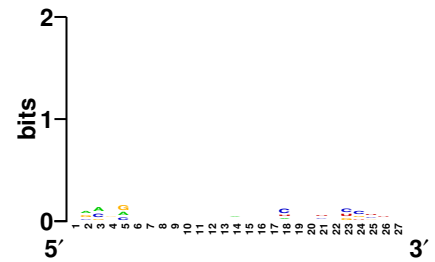

28-mers:

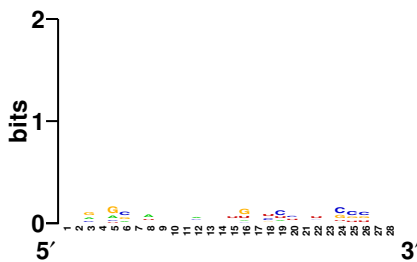

29-mers:

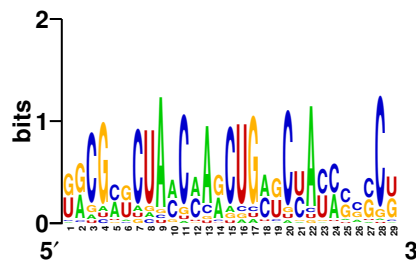

30-mers:

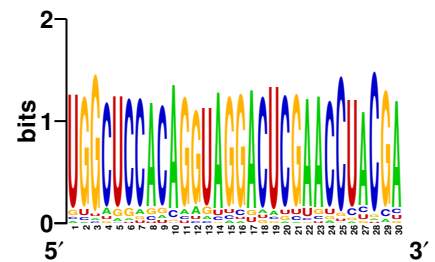

Adult female, library 1:

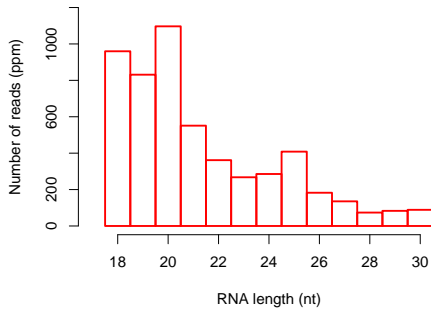

19-mers:

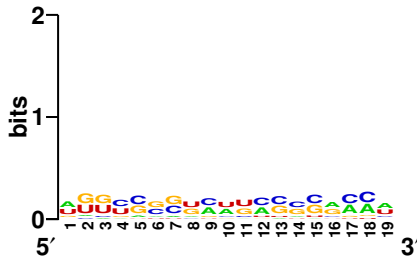

20-mers:

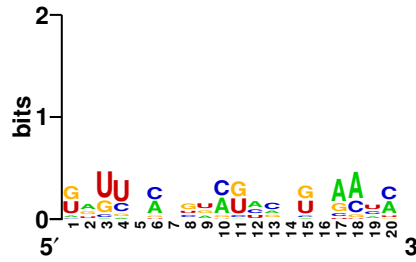

18-mers:

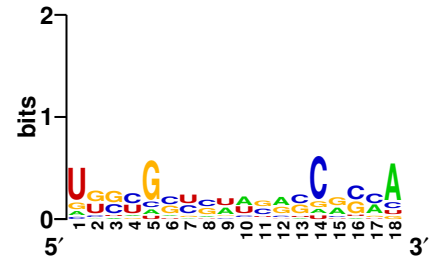

21-mers:

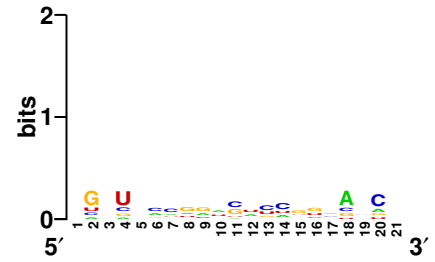

22-mers:

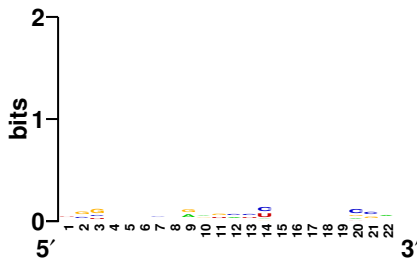

23-mers:

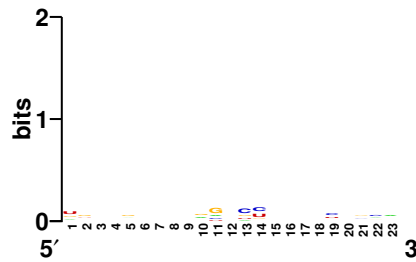

24-mers:

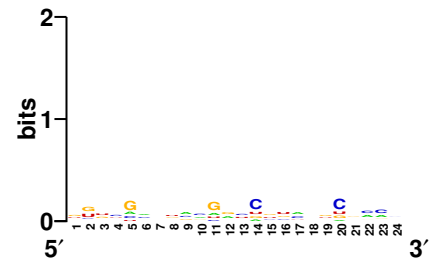

25-mers:

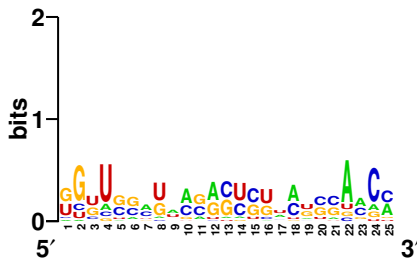

26-mers:

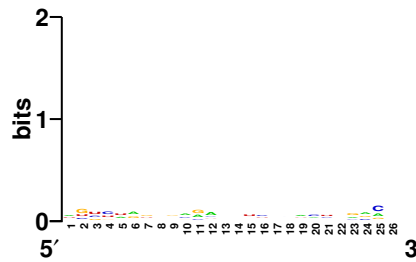

27-mers:

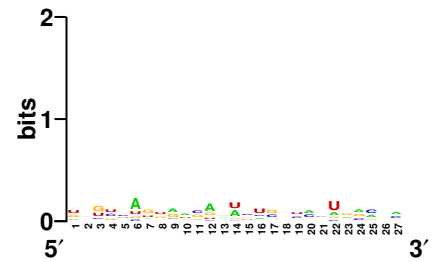

28-mers:

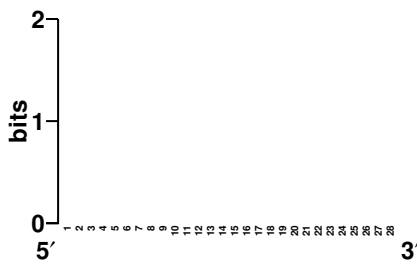

29-mers:

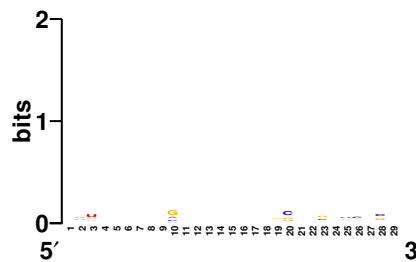

30-mers:

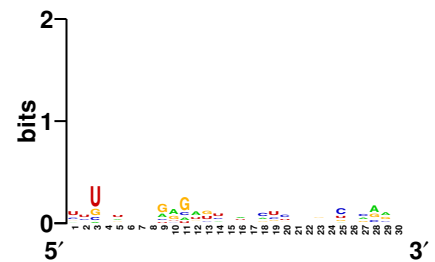

Adult male, library 1:

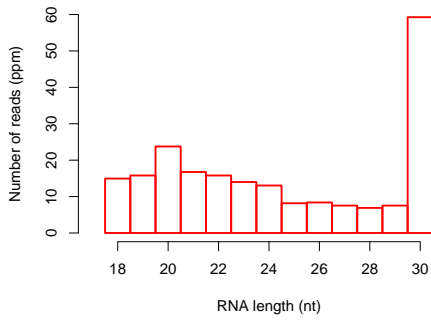

19-mers:

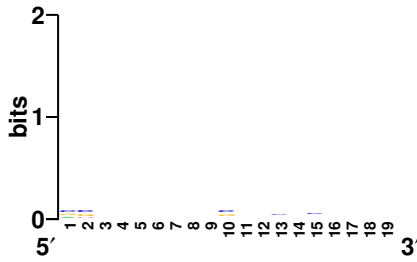

20-mers:

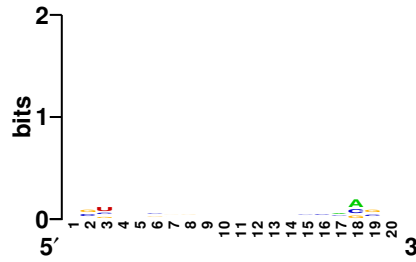

18-mers:

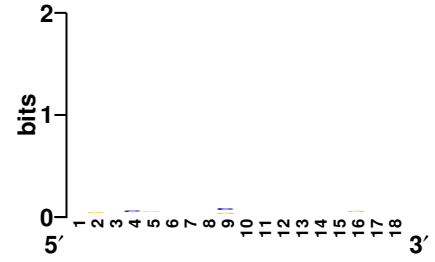

21-mers:

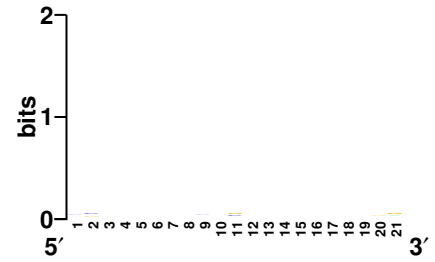

22-mers:

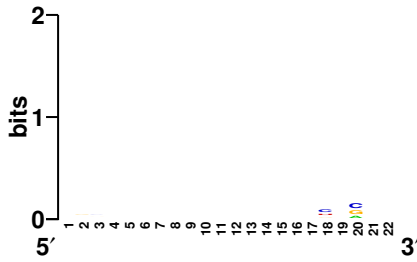

23-mers:

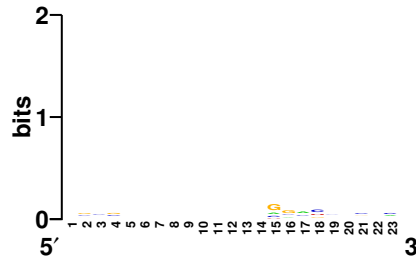

24-mers:

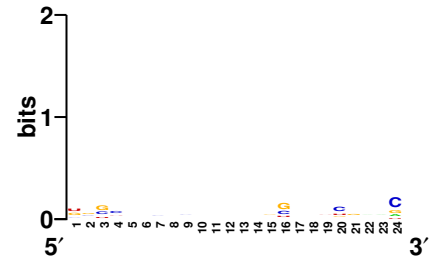

25-mers:

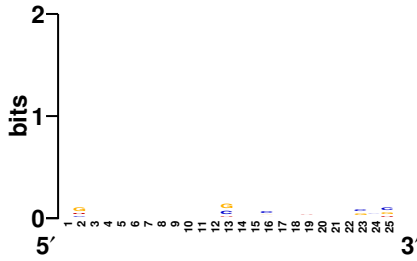

26-mers:

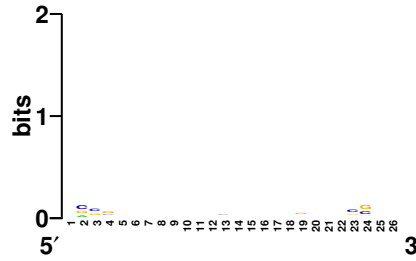

27-mers:

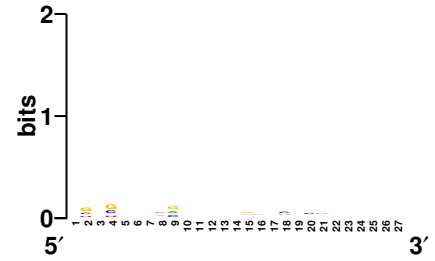

28-mers:

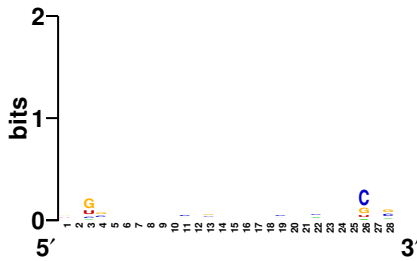

29-mers:

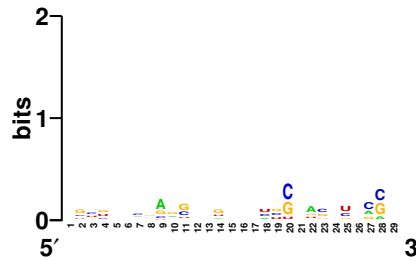

30-mers:

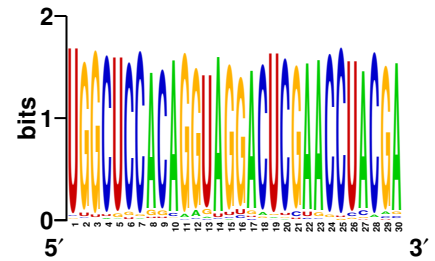

## 7.2 Libraries #2 (3' modified, 5' monophosphorylated small RNAs)

Embryo 8h, library 2:

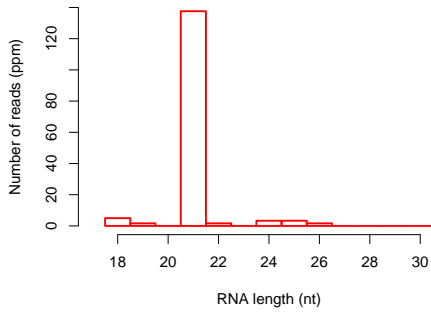

19-mers:

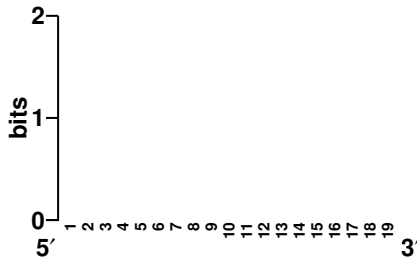

22-mers:

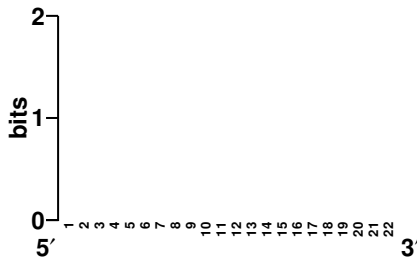

25-mers:

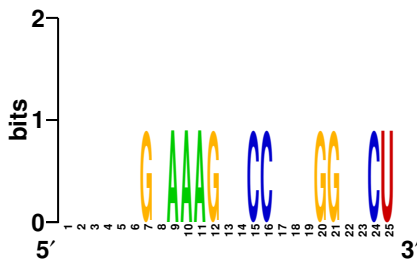

28-mers:  
(no read)

20-mers:

(no read)

23-mers:

(no read)

26-mers:

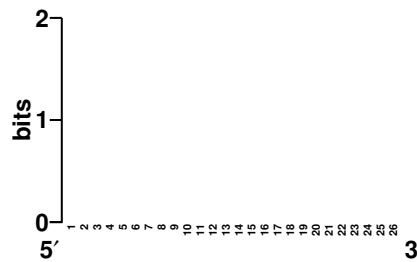

29-mers:

(no read)

18-mers:

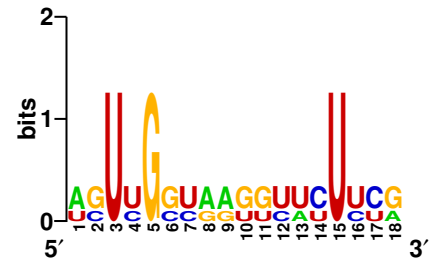

21-mers:

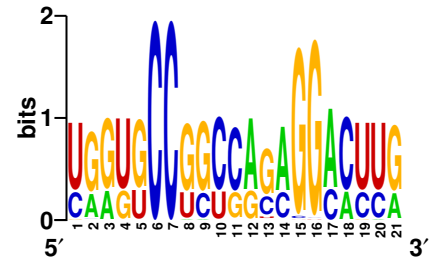

24-mers:

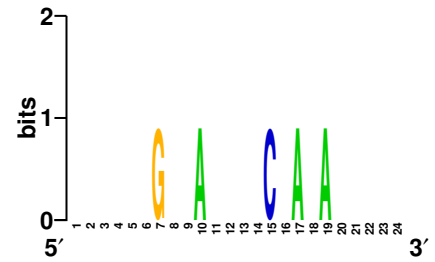

27-mers:

(no read)

30-mers:

(no read)

Embryo 15h, library 2:

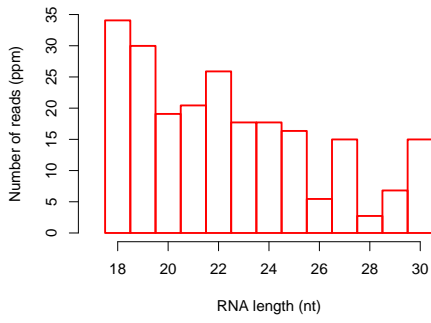

19-mers:

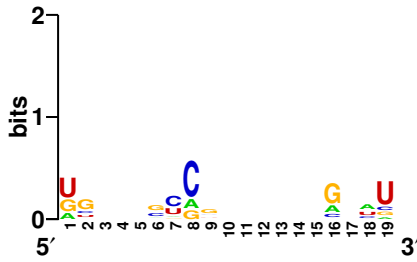

20-mers:

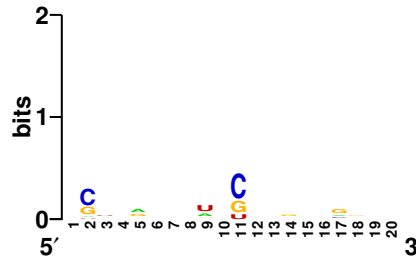

18-mers:

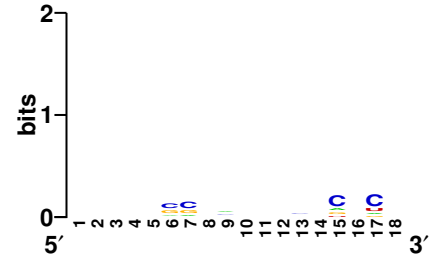

21-mers:

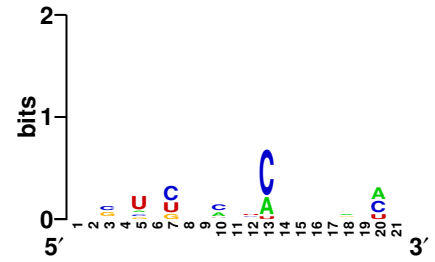

22-mers:

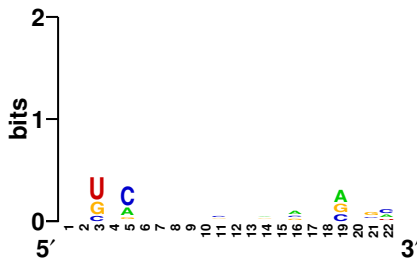

23-mers:

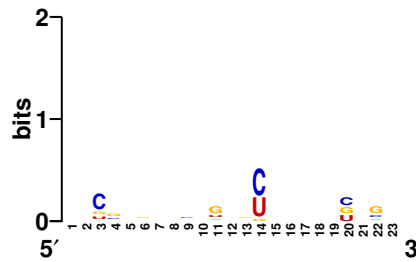

24-mers:

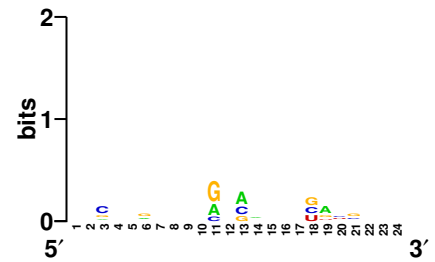

25-mers:

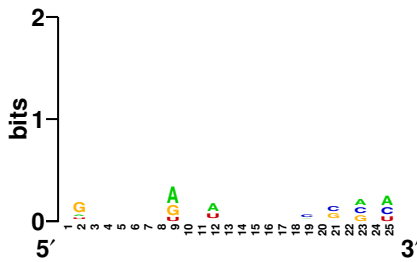

26-mers:

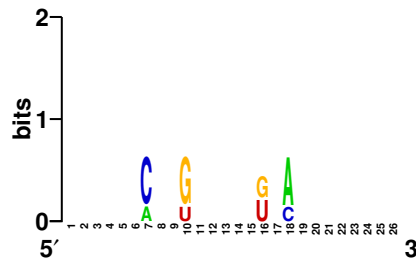

27-mers:

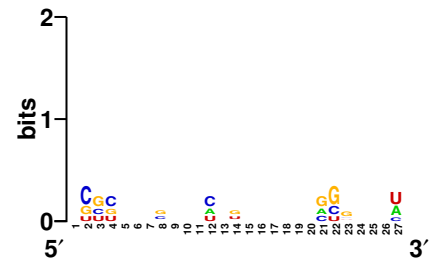

28-mers:

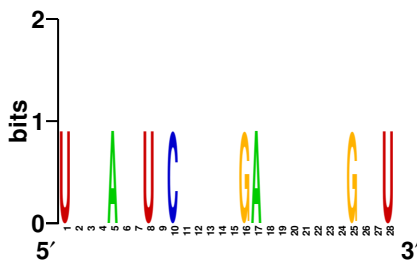

29-mers:

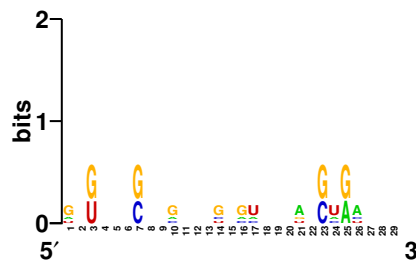

30-mers:

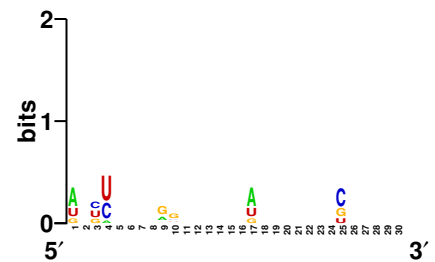





Embryo 60h, library 2:

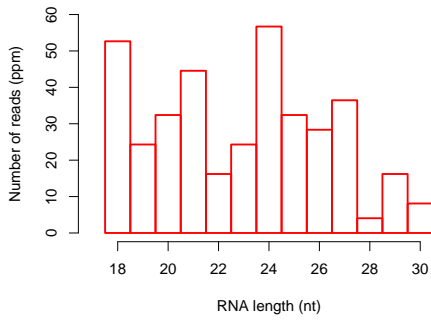

19-mers:

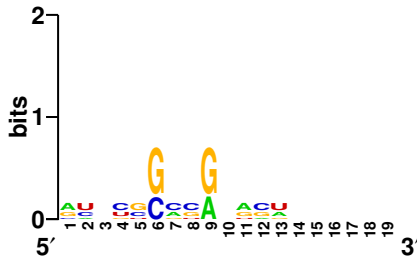

20-mers:

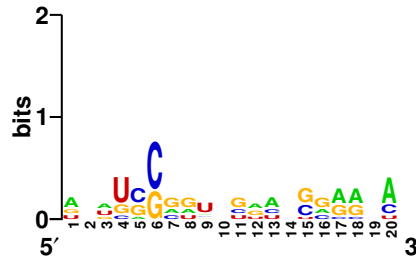

18-mers:

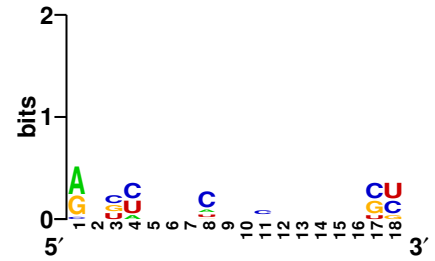

21-mers:

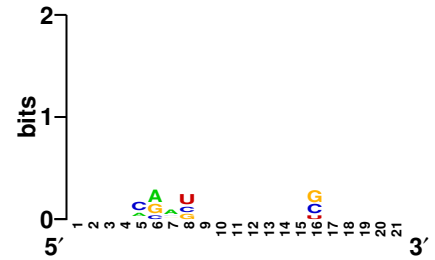

22-mers:

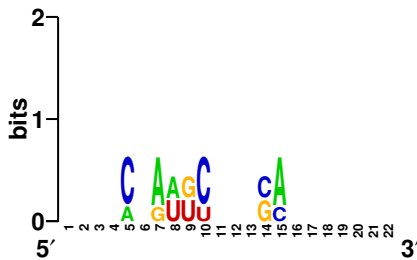

23-mers:

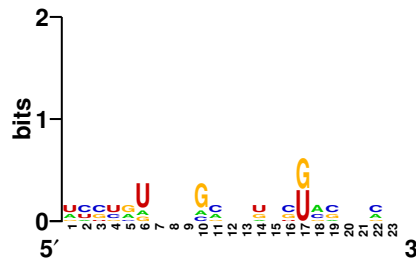

24-mers:

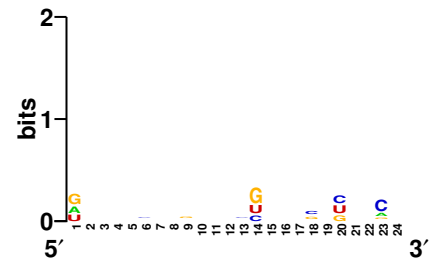

25-mers:

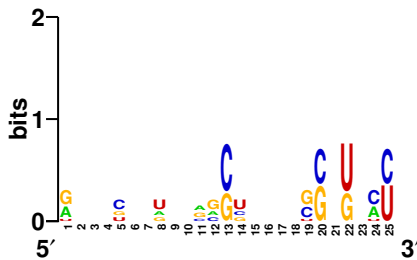

26-mers:

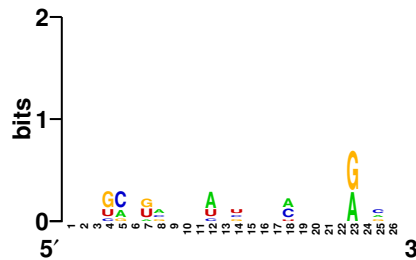

27-mers:

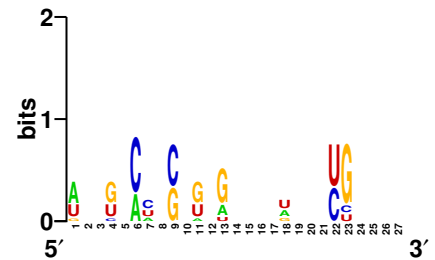

28-mers:

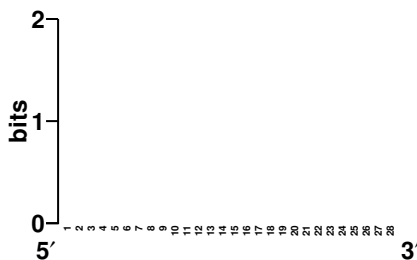

29-mers:

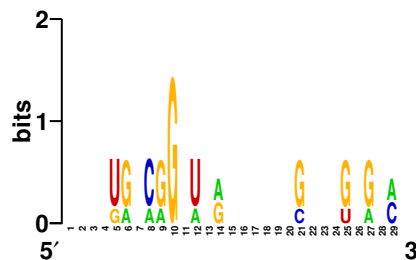

30-mers:

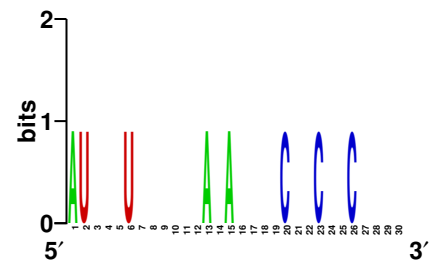

Adult female, library 2:

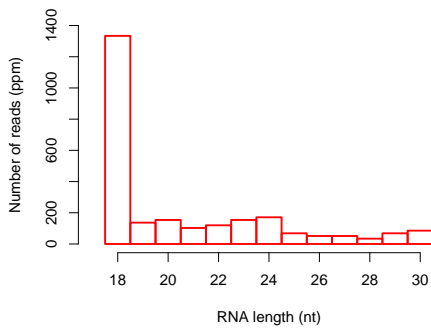

19-mers:

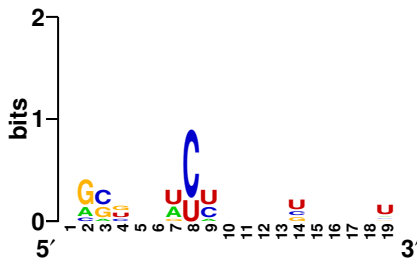

20-mers:

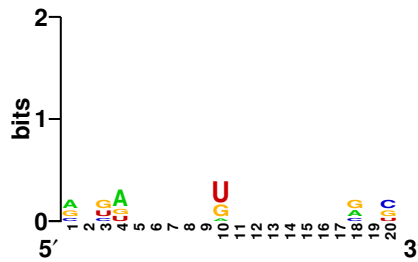

18-mers:

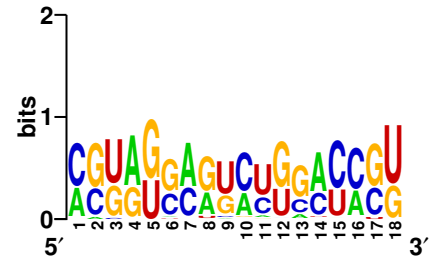

21-mers:

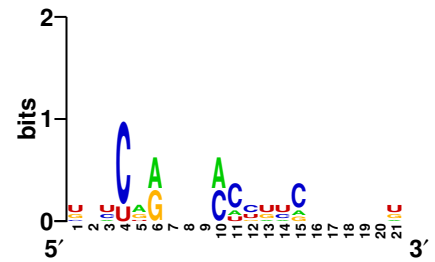

22-mers:

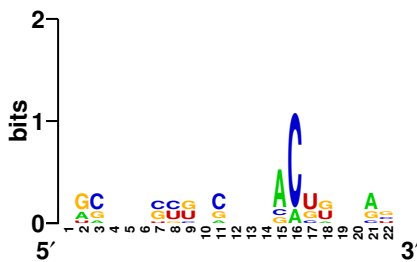

23-mers:

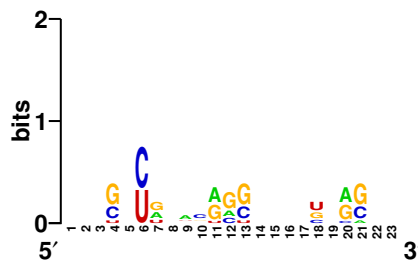

24-mers:

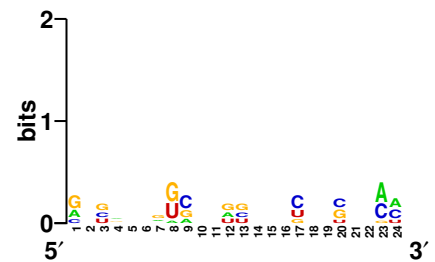

25-mers:

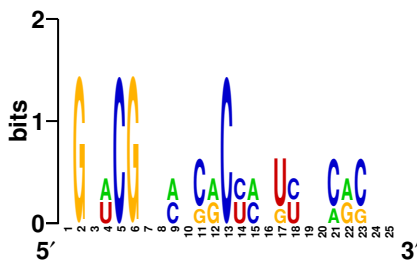

26-mers:

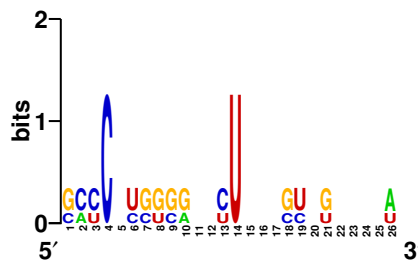

27-mers:

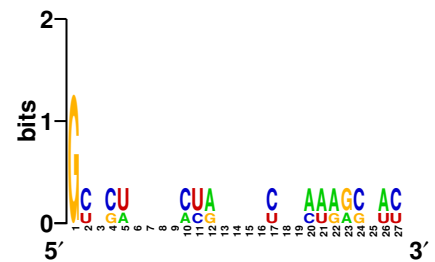

28-mers:

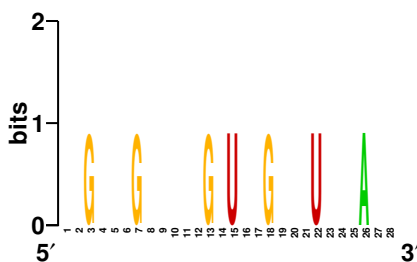

29-mers:

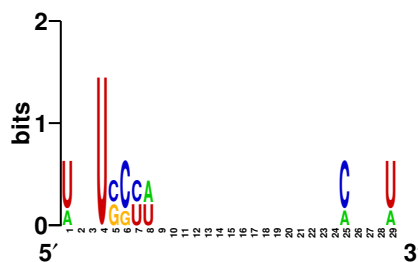

30-mers:

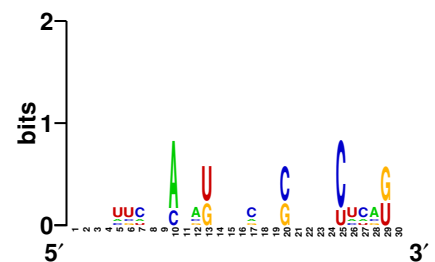

Adult male, library 2:

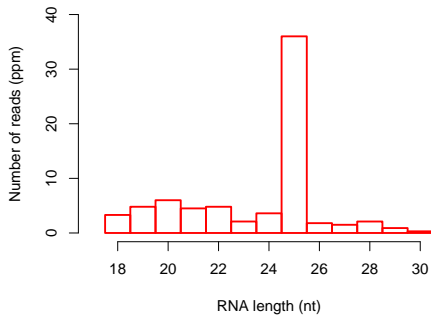

19-mers:

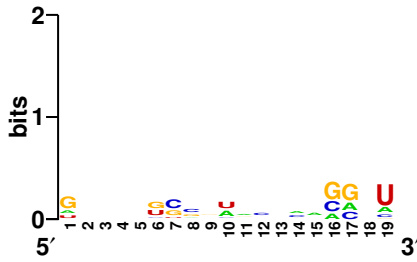

20-mers:

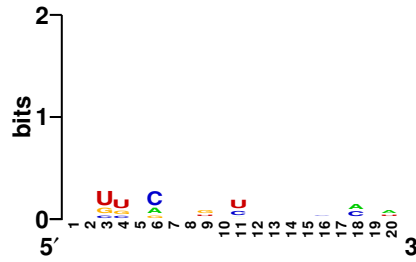

18-mers:

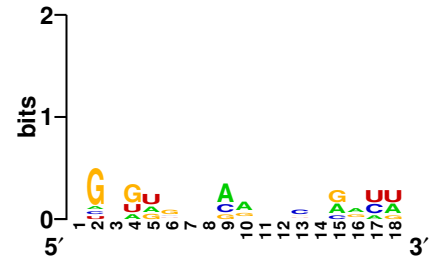

21-mers:

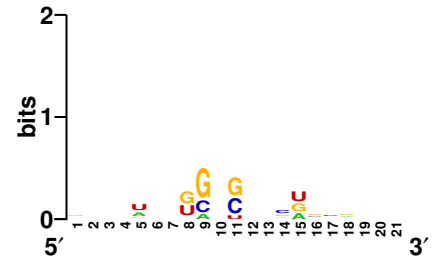

22-mers:

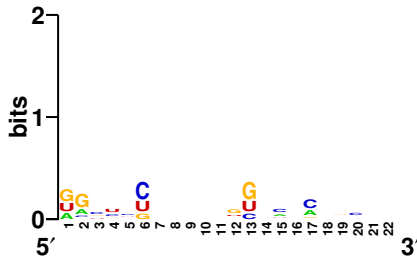

23-mers:

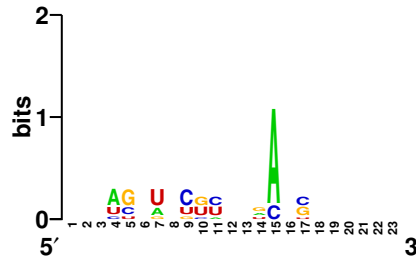

24-mers:

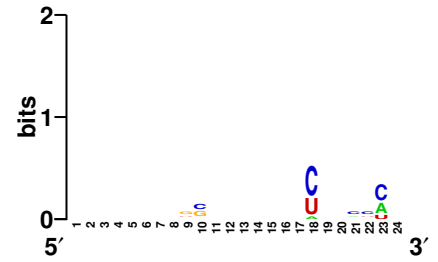

25-mers:

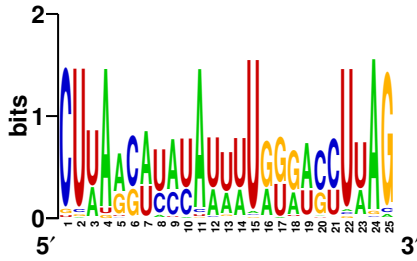

26-mers:

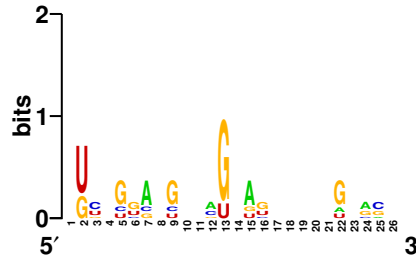

27-mers:

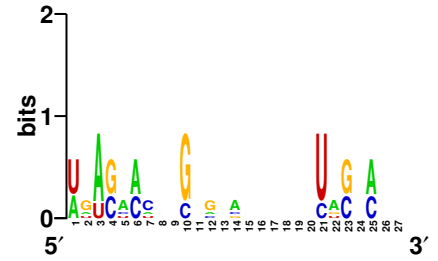

28-mers:

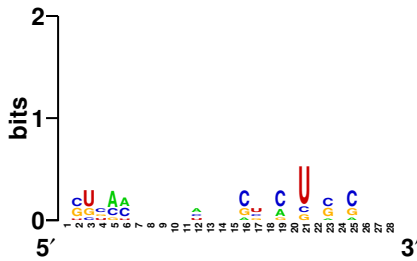

29-mers:

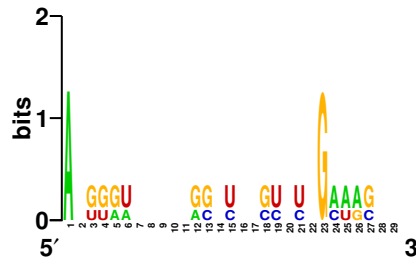

30-mers:

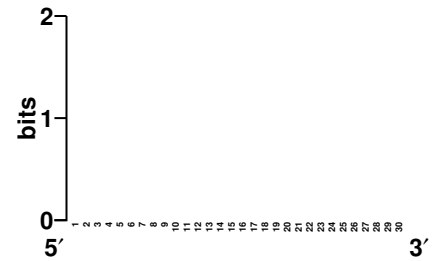

### 7.3 Libraries #3 (total 5' hydroxyl or polyphosphorylated small RNAs)

Embryo 8h, library 3:

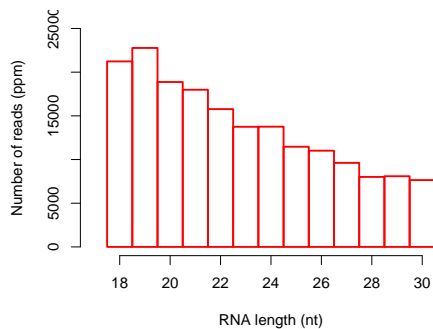

18-mers:

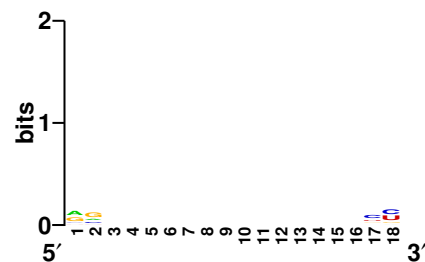

19-mers:

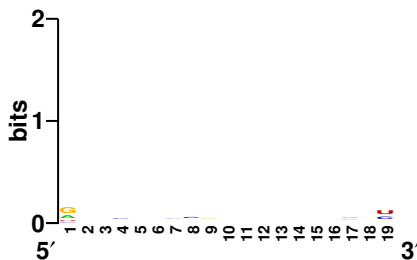

20-mers:

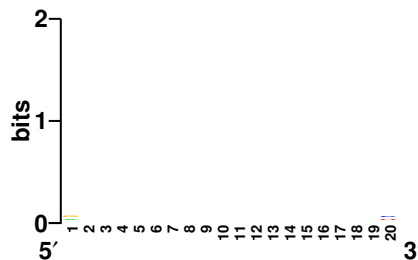

21-mers:

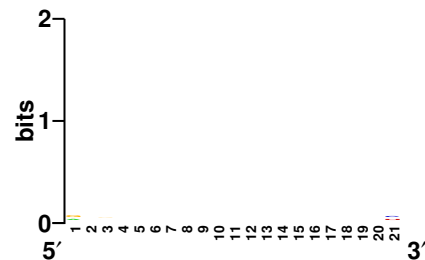

22-mers:

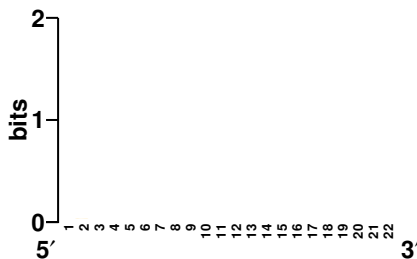

23-mers:

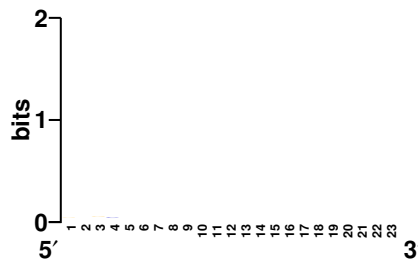

24-mers:

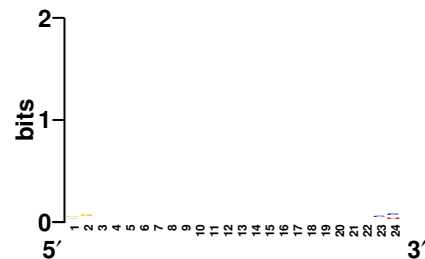

25-mers:

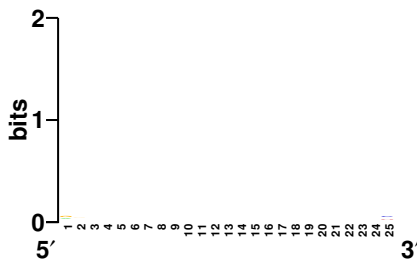

26-mers:

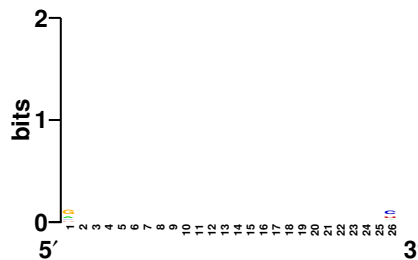

27-mers:

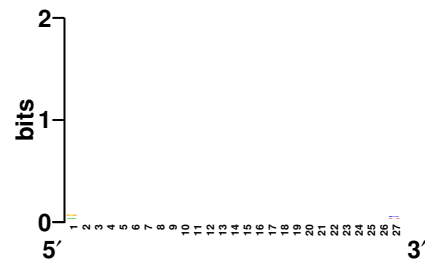

28-mers:

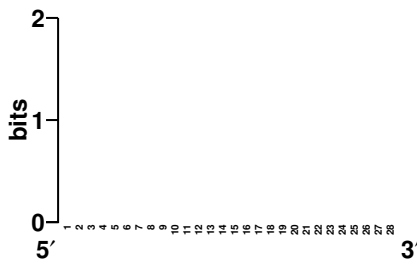

29-mers:

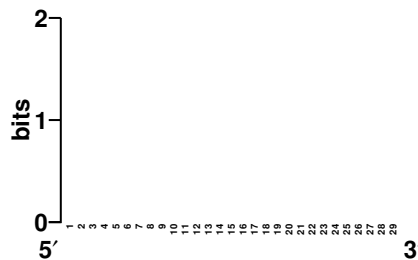

30-mers:

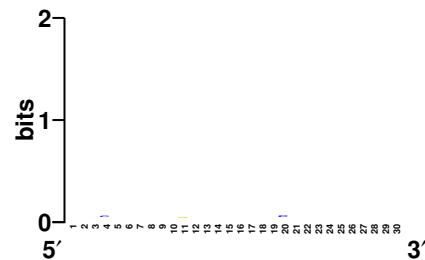

Embryo 15h, library 3:

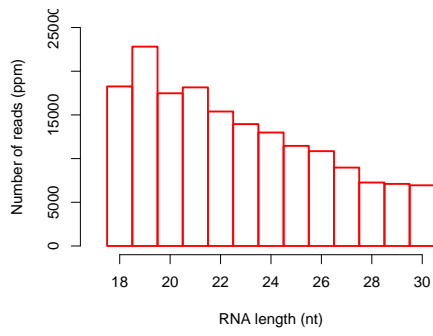

19-mers:

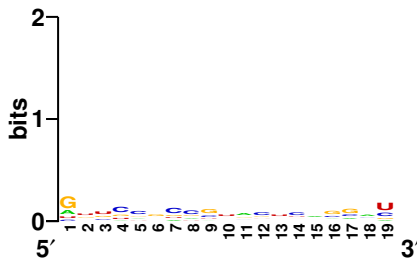

20-mers:

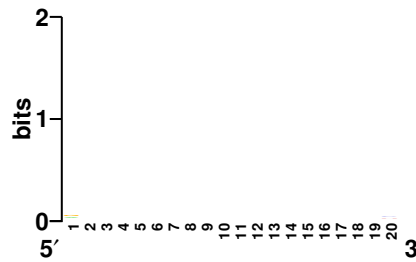

18-mers:

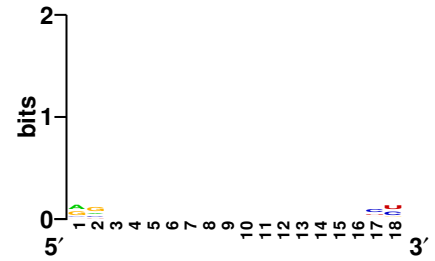

21-mers:

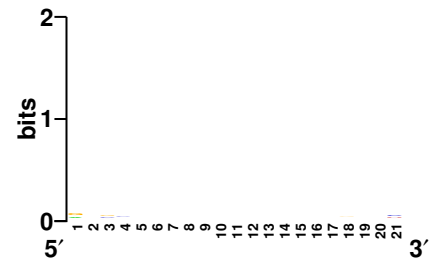

22-mers:

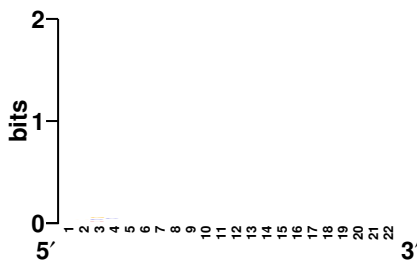

23-mers:

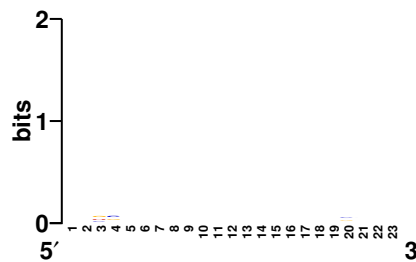

24-mers:

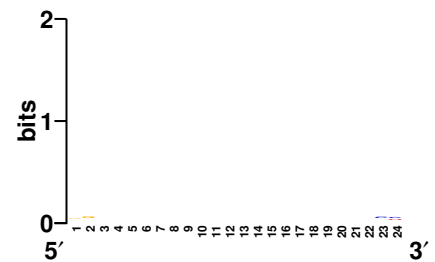

25-mers:

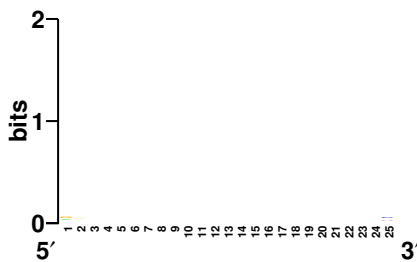

26-mers:

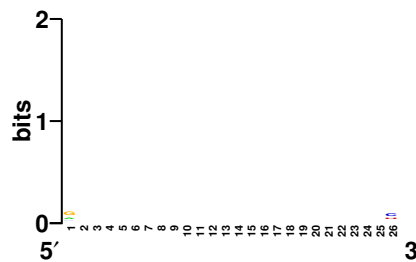

27-mers:

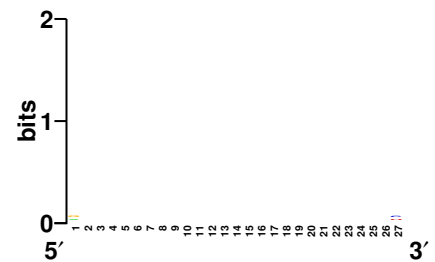

28-mers:

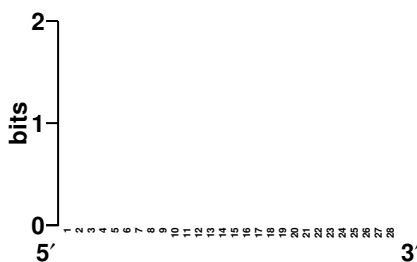

29-mers:

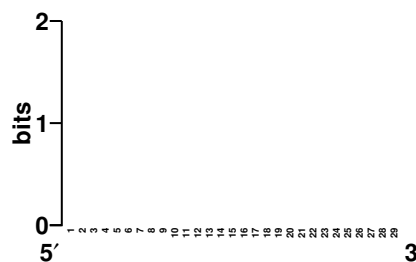

30-mers:

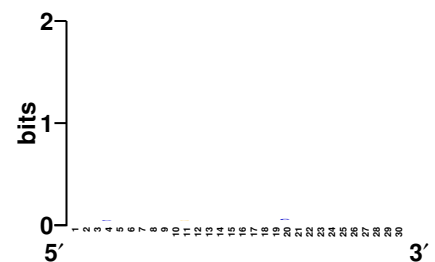

Embryo 36h, library 3:

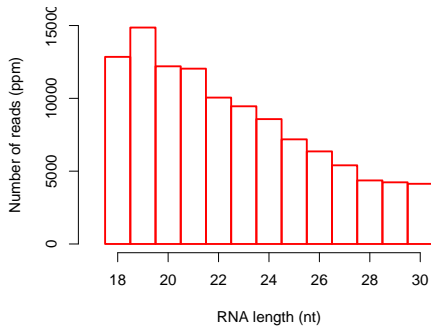

19-mers:

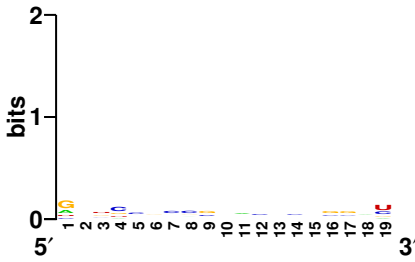

20-mers:

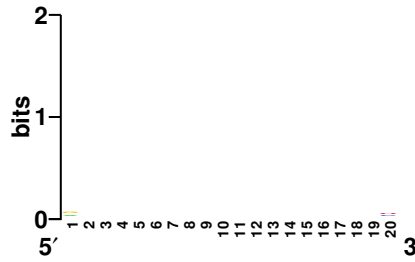

18-mers:

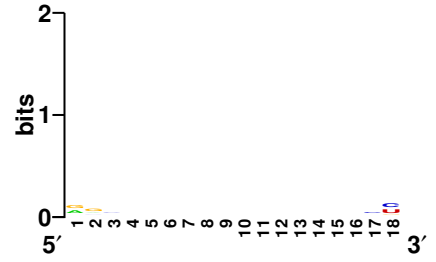

21-mers:

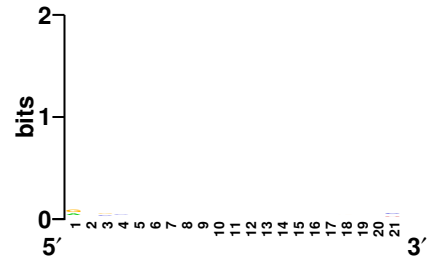

22-mers:

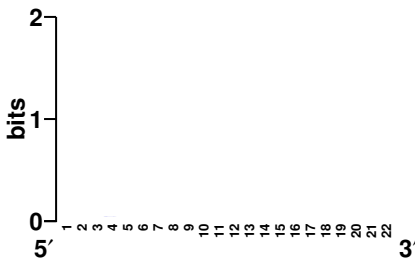

23-mers:

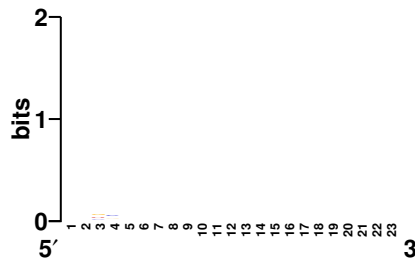

24-mers:

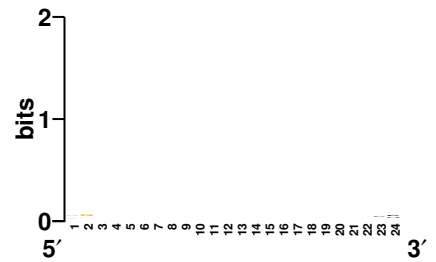

25-mers:

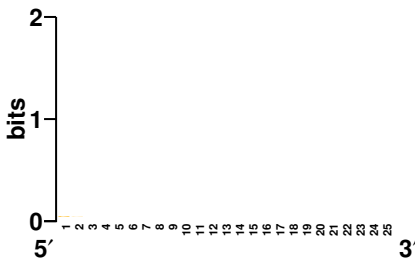

26-mers:

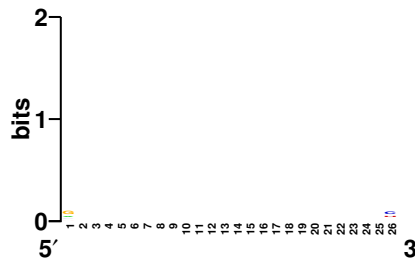

27-mers:

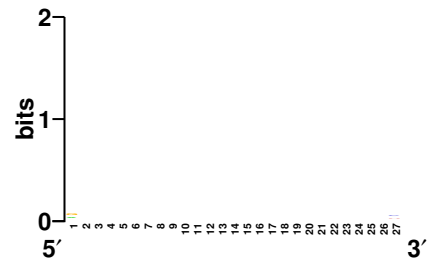

28-mers:

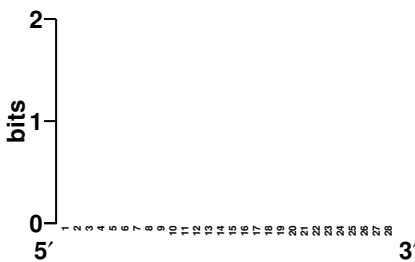

29-mers:

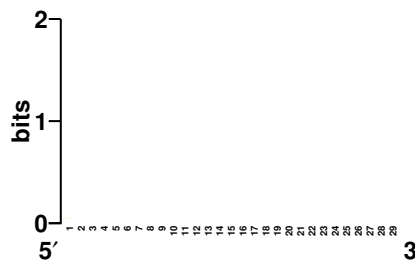

30-mers:

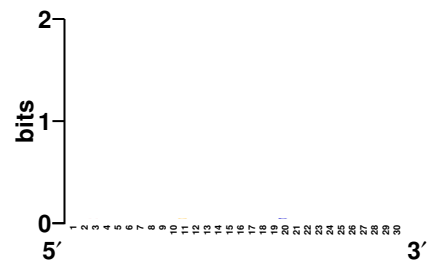

Embryo 60h, library 3:

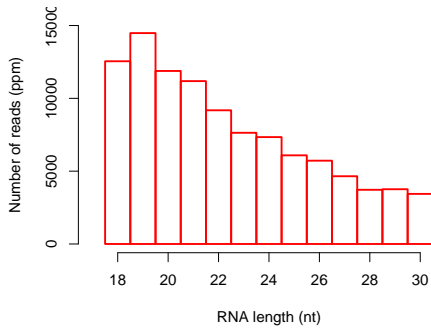

19-mers:

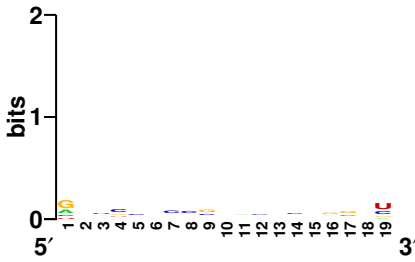

20-mers:

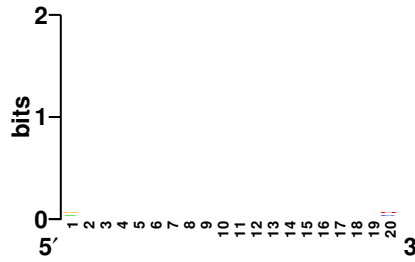

18-mers:

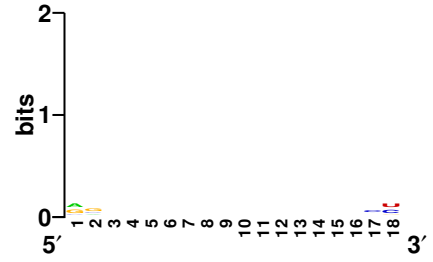

21-mers:

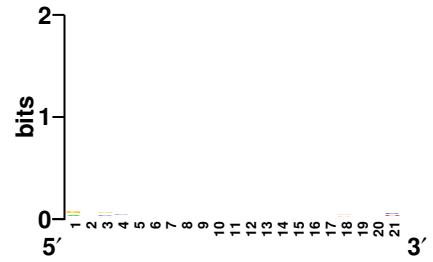

22-mers:

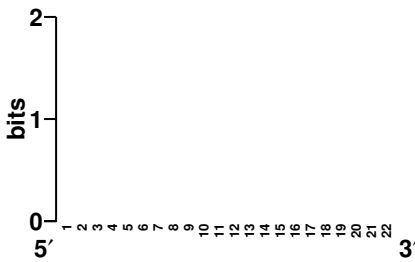

23-mers:

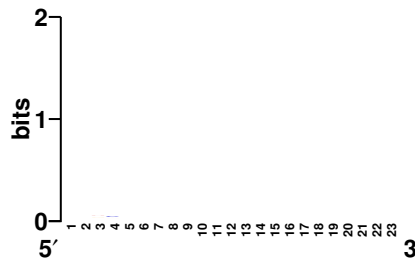

24-mers:

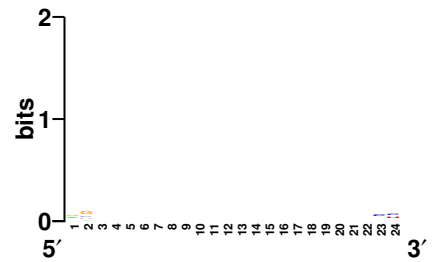

25-mers:

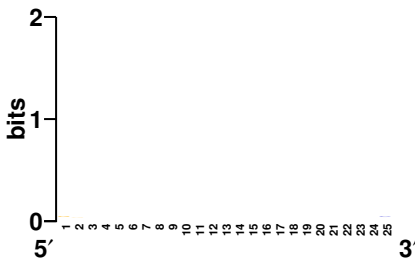

26-mers:

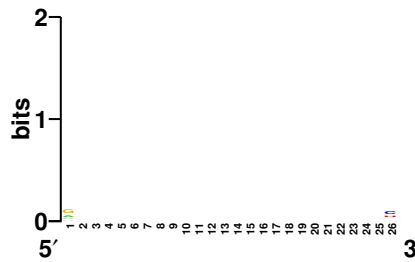

27-mers:

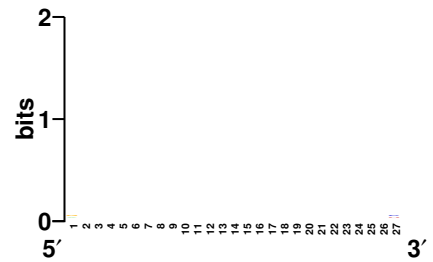

28-mers:



29-mers:

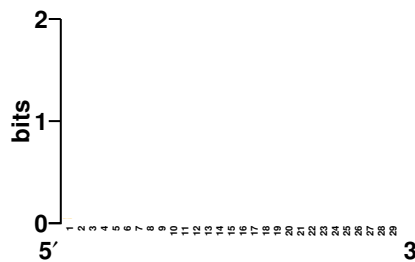

30-mers:

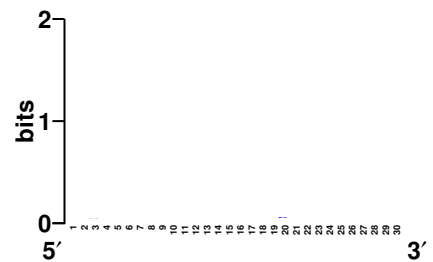



Adult female, library 3:

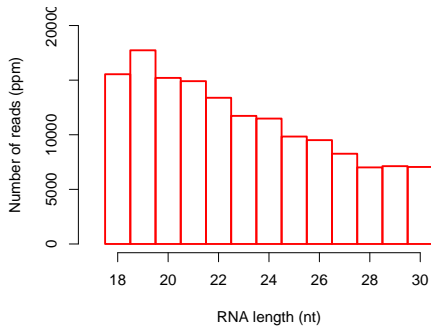

19-mers:

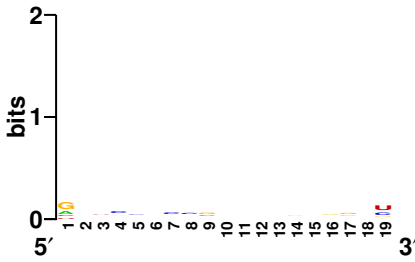

20-mers:

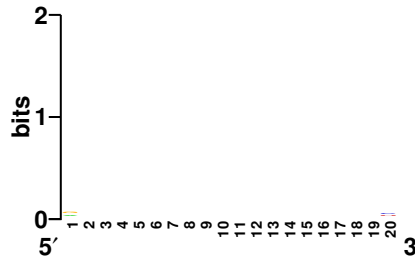

18-mers:

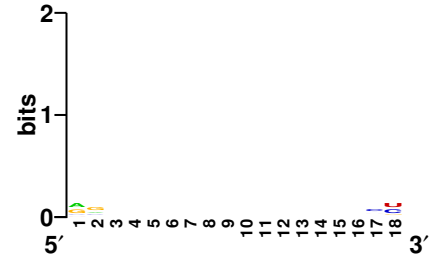

21-mers:

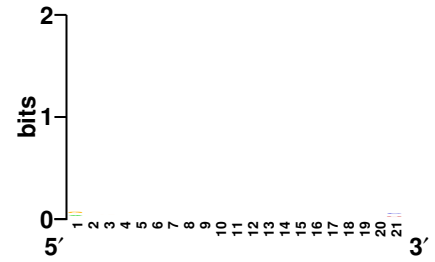

22-mers:



23-mers:

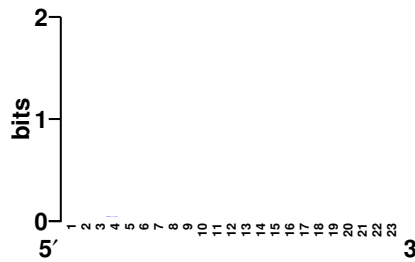

24-mers:

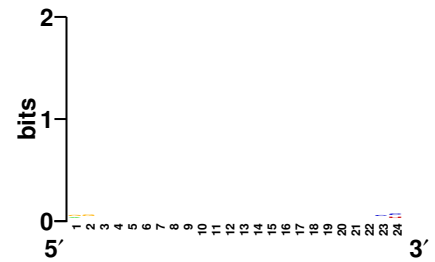

25-mers:

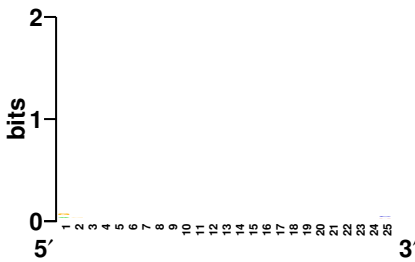

26-mers:

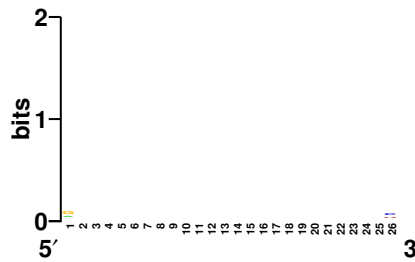

27-mers:

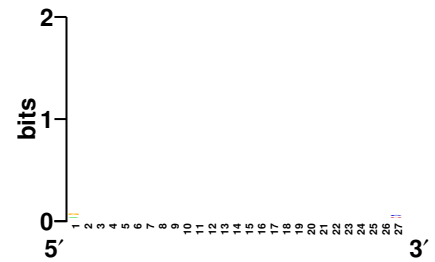

28-mers:



29-mers:

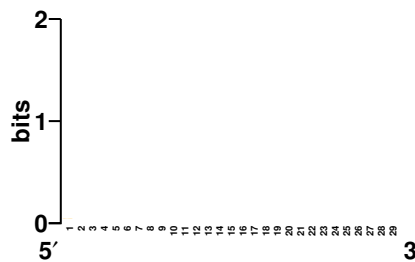

30-mers:

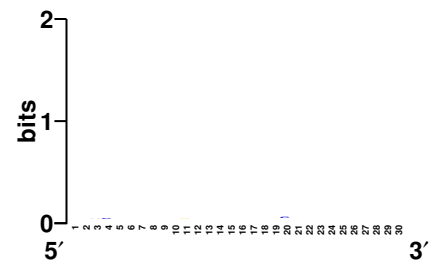

Adult male, library 3:

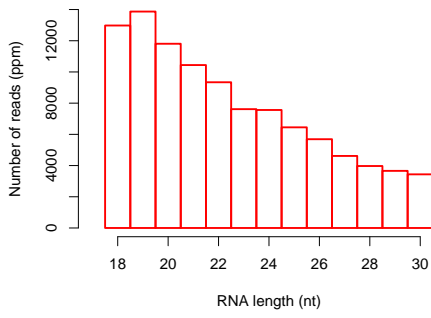

19-mers:

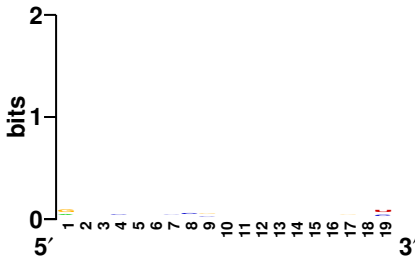

20-mers:

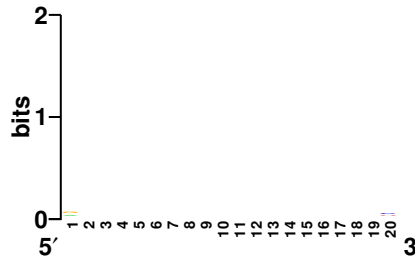

18-mers:

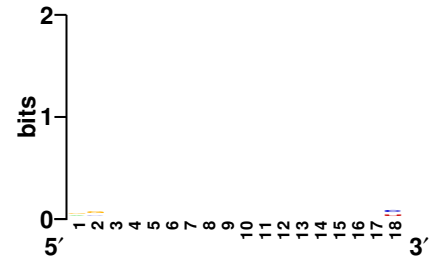

21-mers:

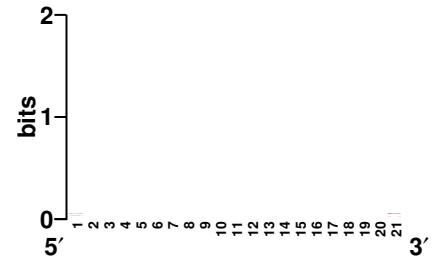

22-mers:



23-mers:

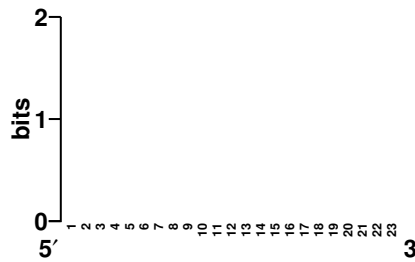

24-mers:

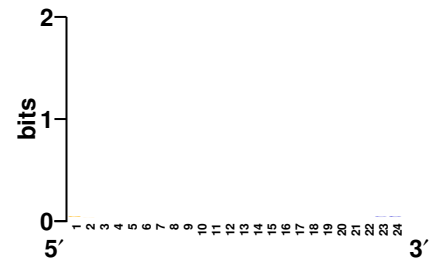

25-mers:

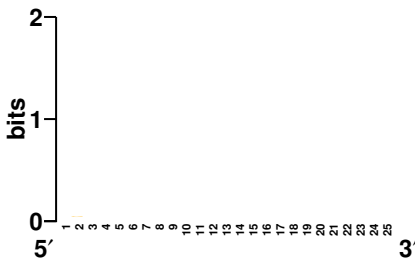

26-mers:

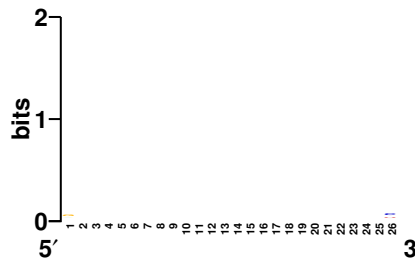

27-mers:

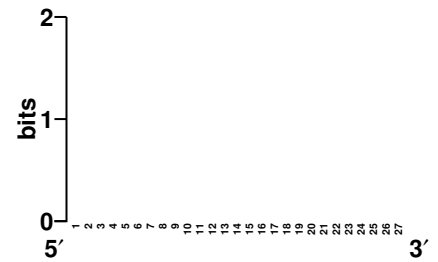

28-mers:



29-mers:

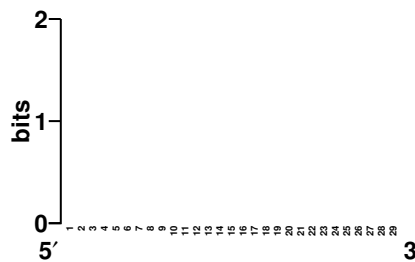

30-mers:

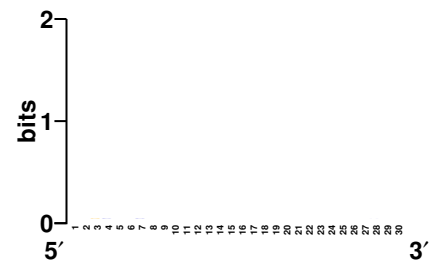



Embryo 15h, library 4:

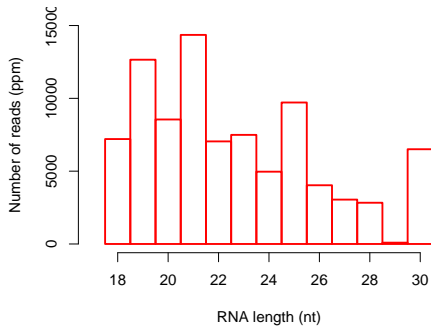

18-mers:

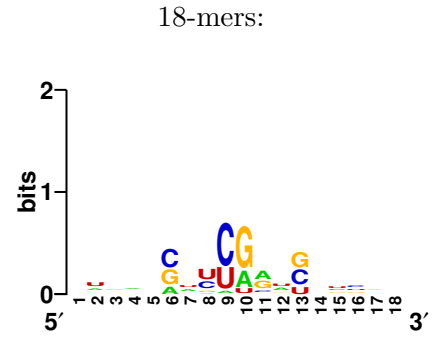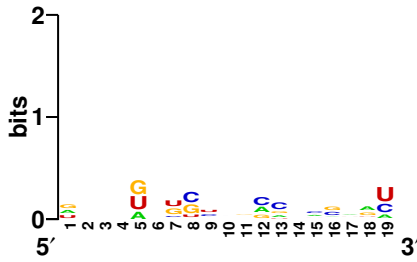

20-mers:

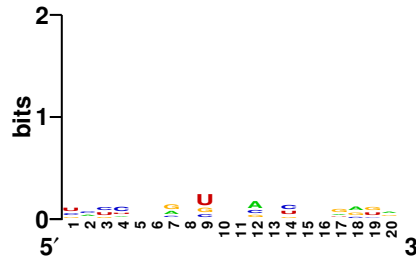

21-mers:

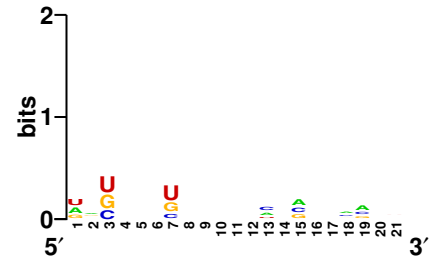

22-mers:

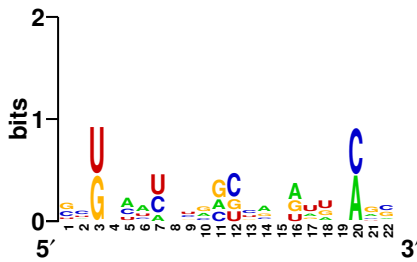

23-mers:

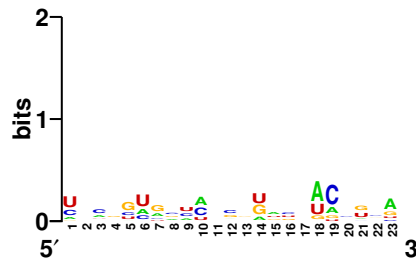

24-mers:

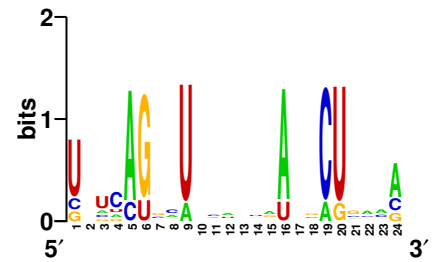

25-mers:

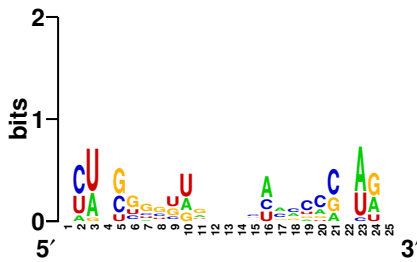

26-mers:

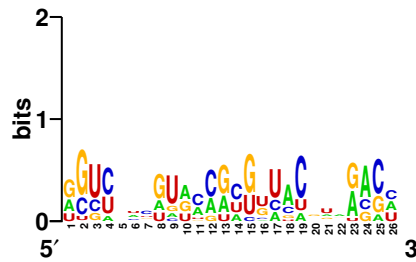

27-mers:

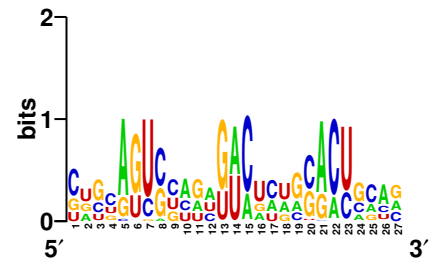

28-mers:

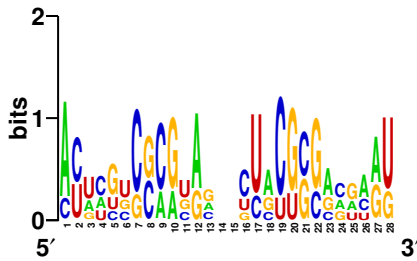

29-mers:

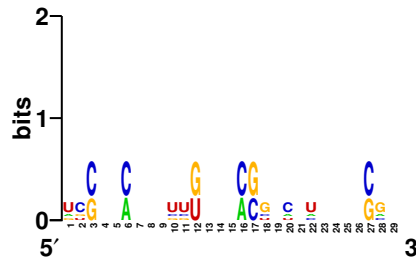

30-mers:

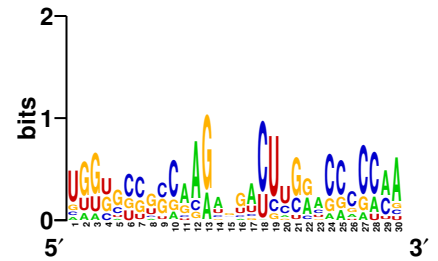

Embryo 36h, library 4:

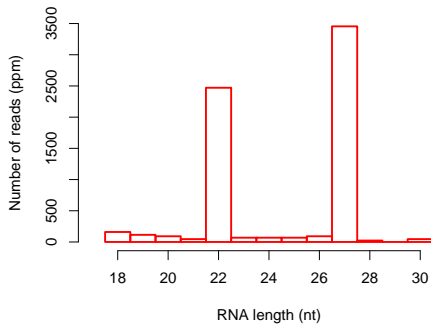

19-mers:

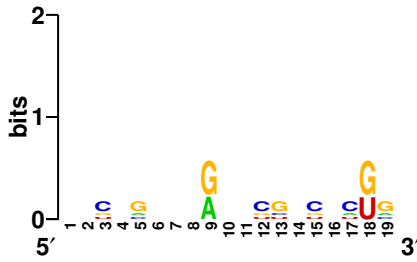

20-mers:

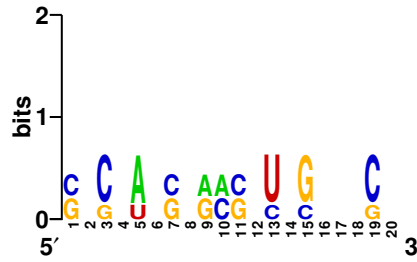

18-mers:

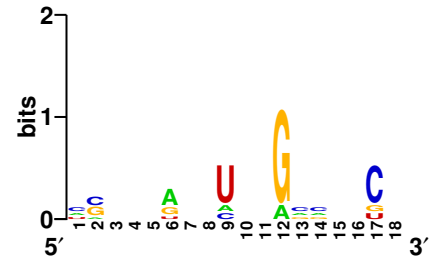

21-mers:

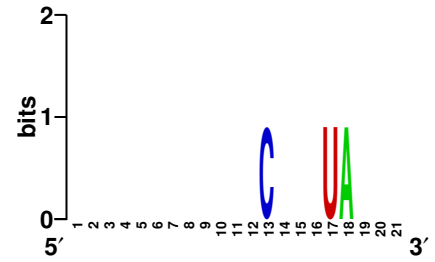

22-mers:

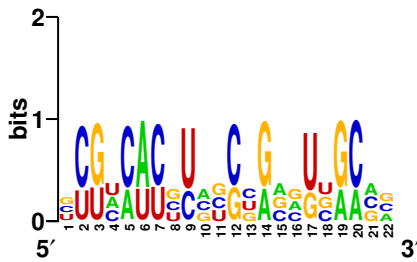

23-mers:

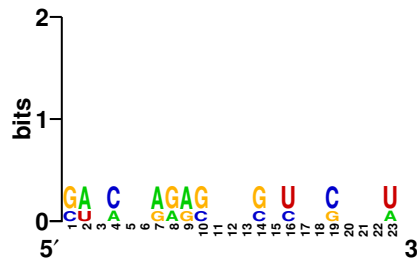

24-mers:

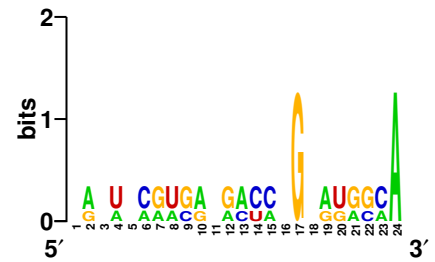

25-mers:

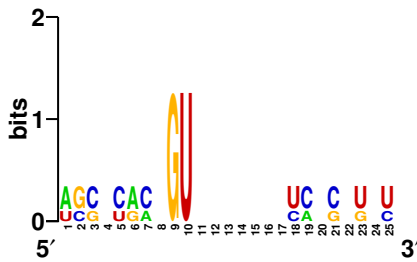

26-mers:

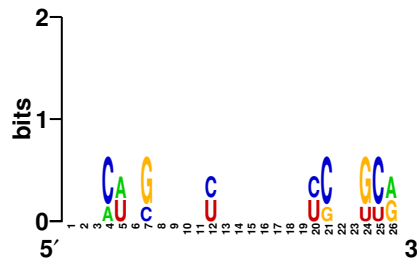

27-mers:

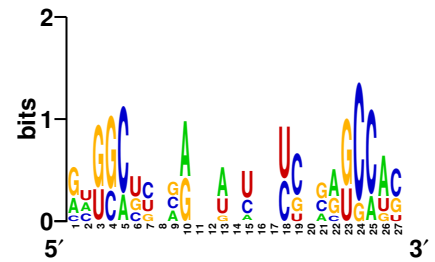

28-mers:



29-mers:

(no read)

30-mers:

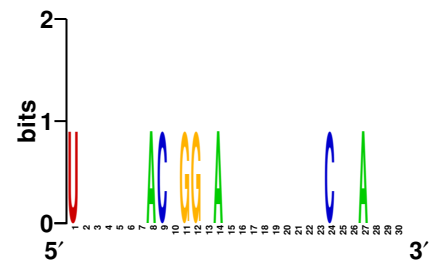

Embryo 60h, library 4:

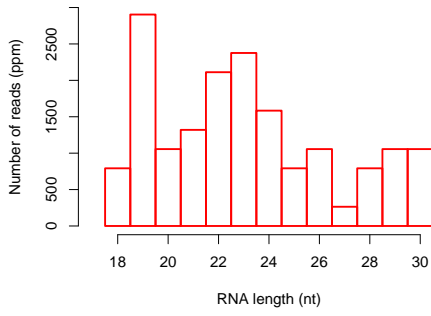

19-mers:

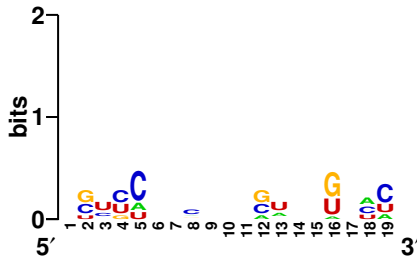

20-mers:

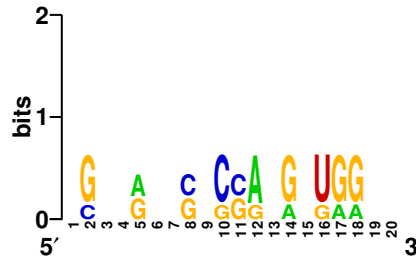

18-mers:

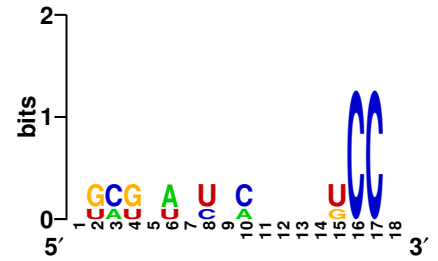

21-mers:

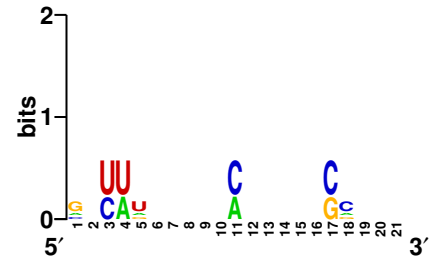

22-mers:

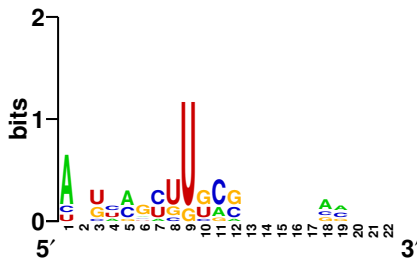

23-mers:

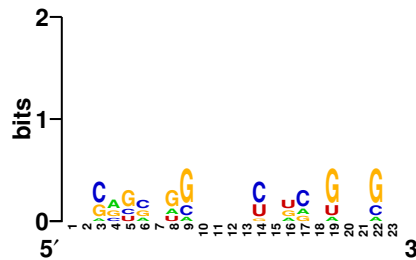

24-mers:

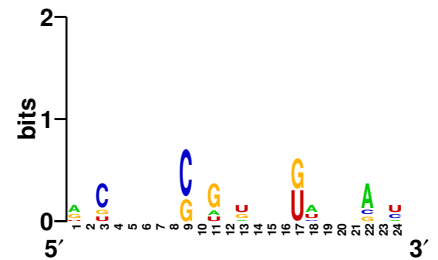

25-mers:

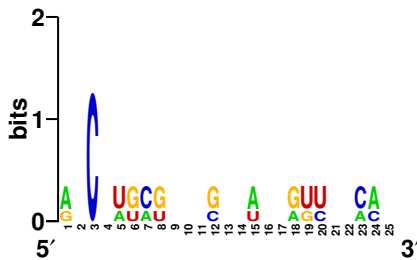

26-mers:

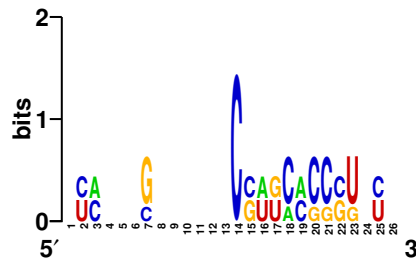

27-mers:

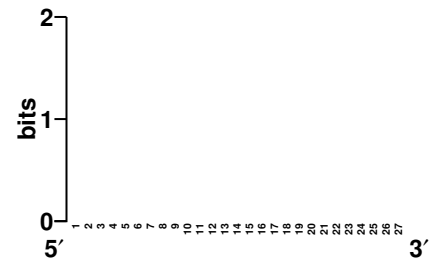

28-mers:

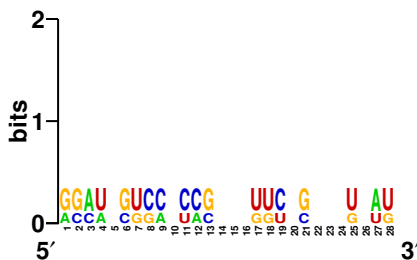

29-mers:

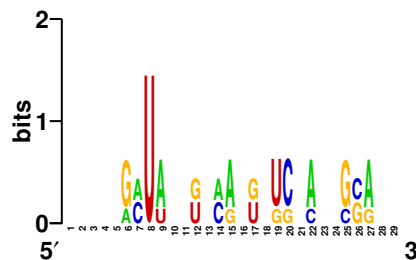

30-mers:

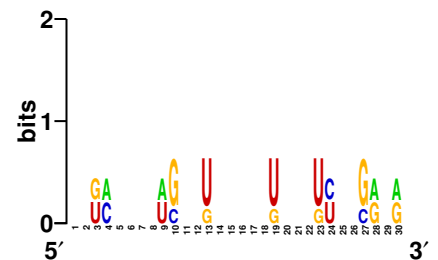

Adult female, library 4:

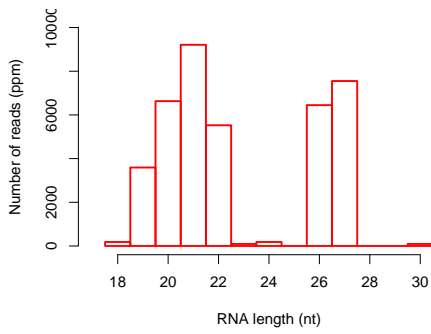

19-mers:

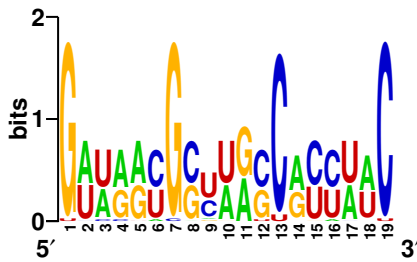

20-mers:

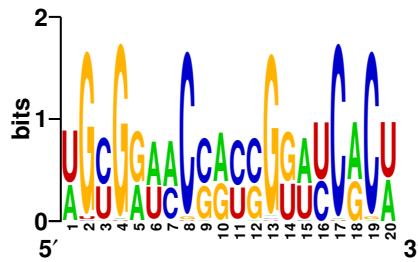

18-mers:

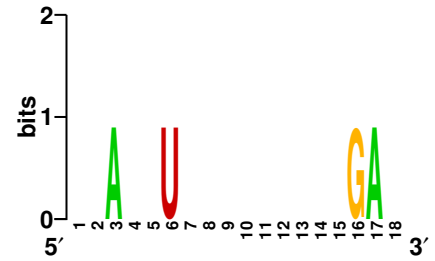

21-mers:

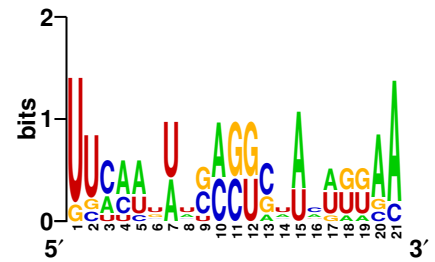

22-mers:

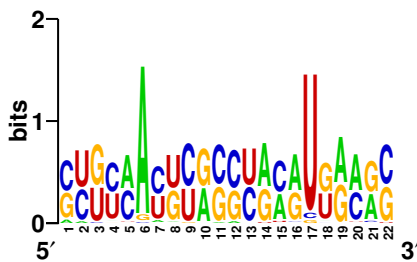

23-mers:

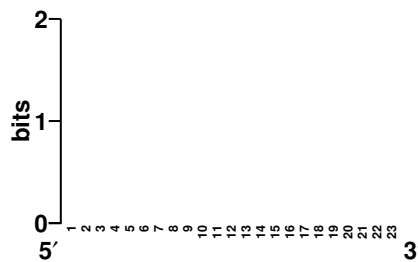

24-mers:

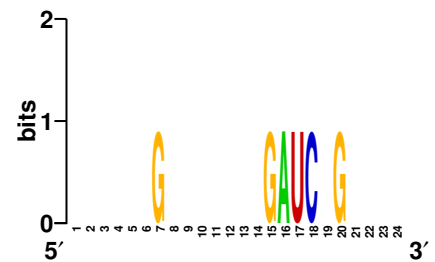

25-mers:

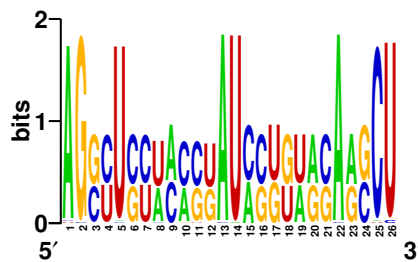

27-mers:

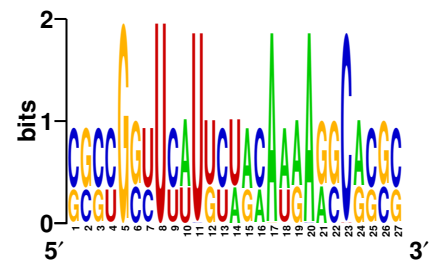

(no read)

28-mers:

29-mers:

30-mers:

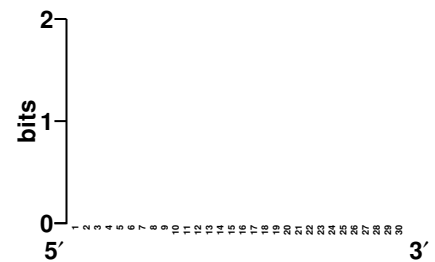

(no read)

(no read)

Adult male, library 4:

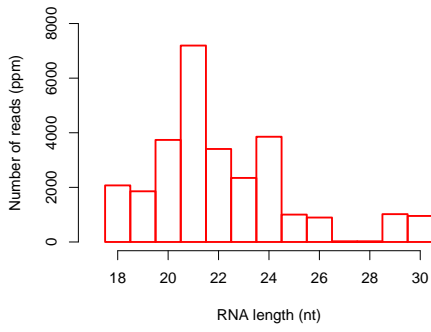

18-mers:

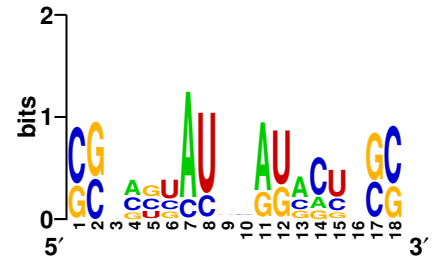

19-mers:

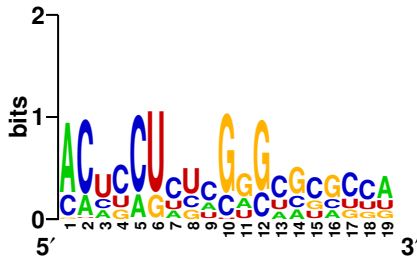

20-mers:

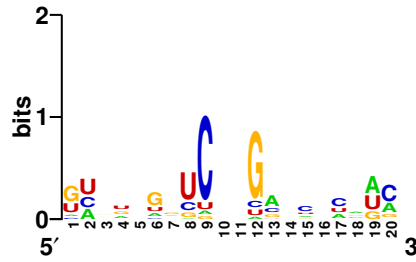

21-mers:

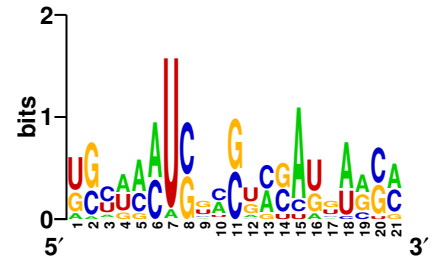

22-mers:

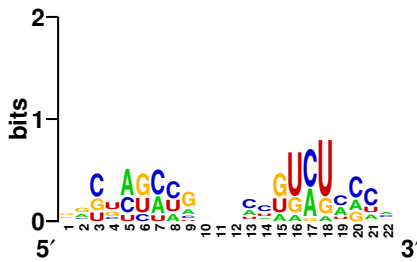

23-mers:

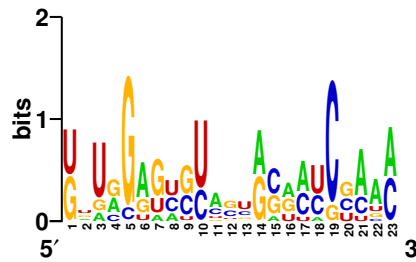

24-mers:

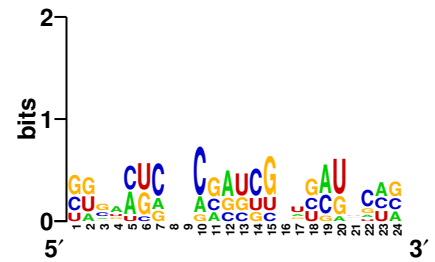

25-mers:

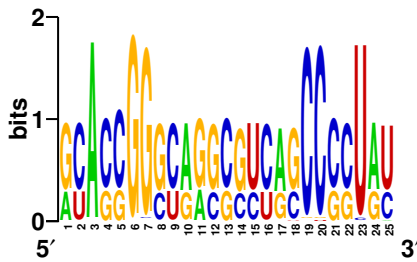

26-mers:

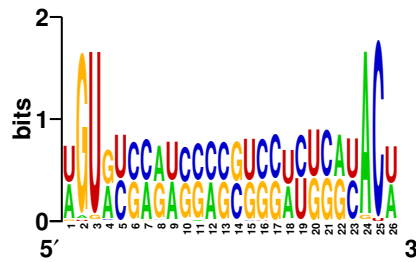

27-mers:

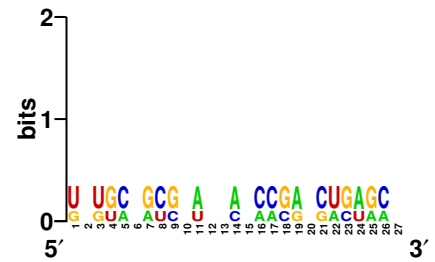

28-mers:

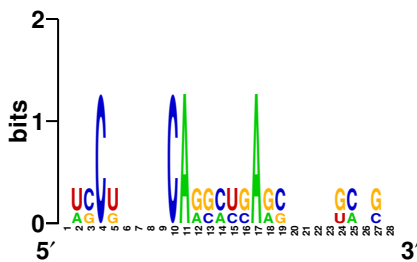

29-mers:

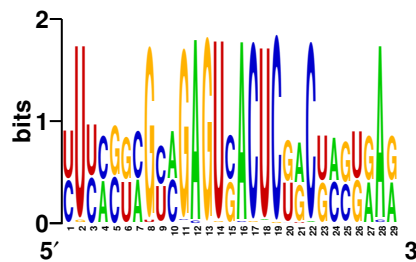

30-mers:

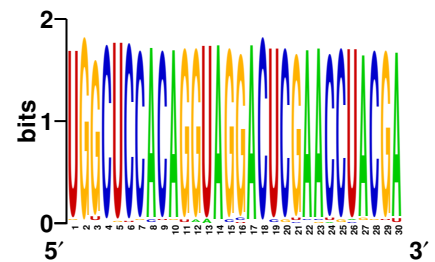



## 8 Extragenomic and extratranscriptomic reads matching the *Vibrio alginolyticus* genome

### 8.1 Libraries #1 (total 5' monophosphorylated small RNAs)

Embryo 8h, library 1:

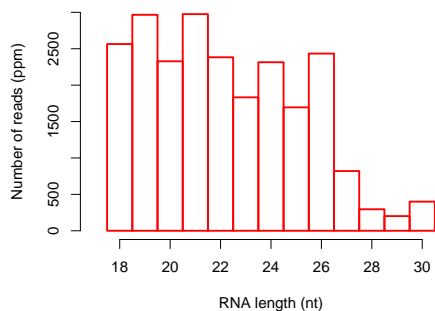

18-mers:

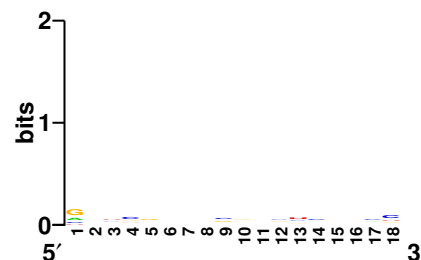

19-mers:

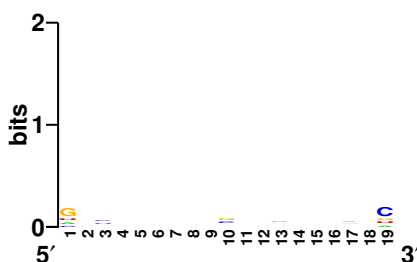

20-mers:

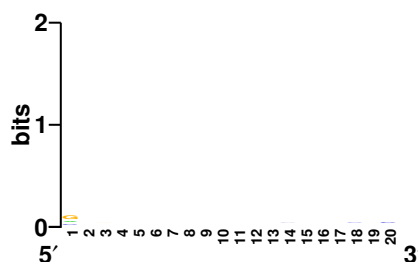

21-mers:

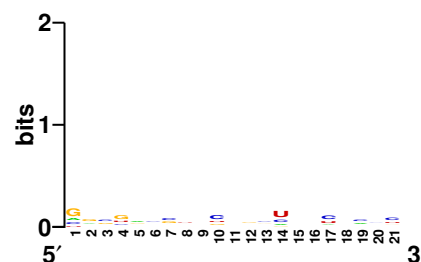

22-mers:

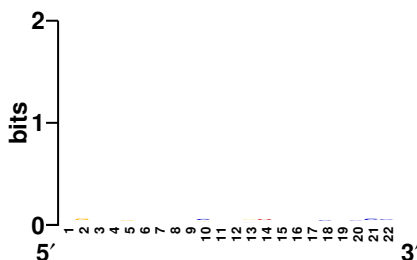

23-mers:

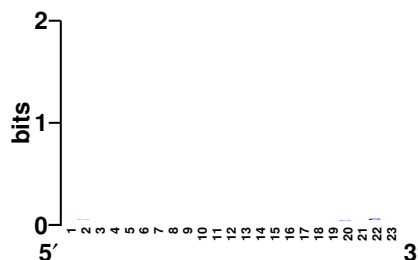

24-mers:

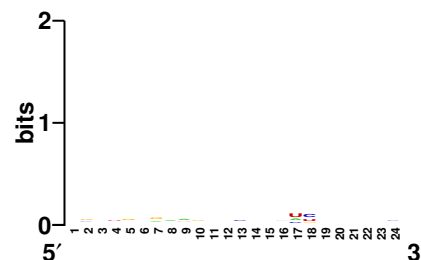

25-mers:

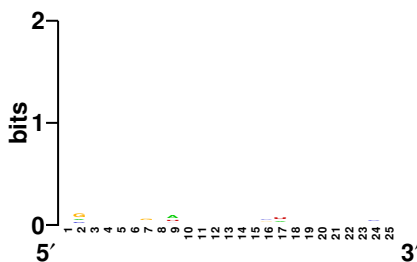

26-mers:

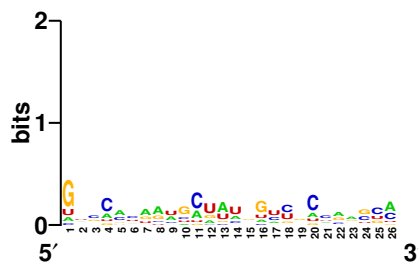

27-mers:

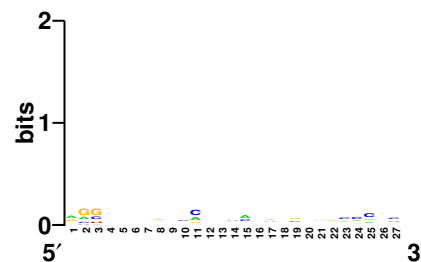

28-mers:

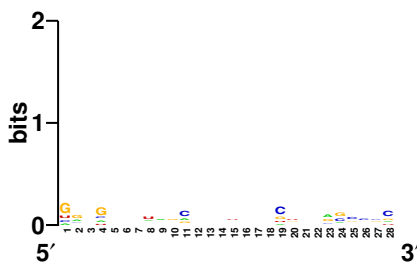

29-mers:

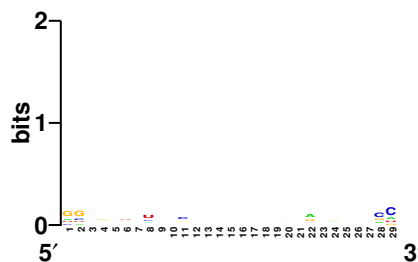

30-mers:

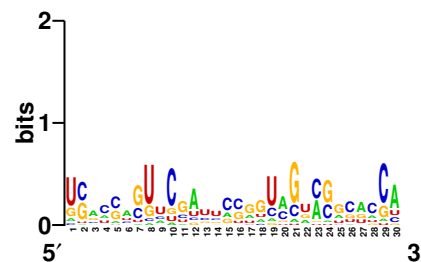

Embryo 15h, library 1:

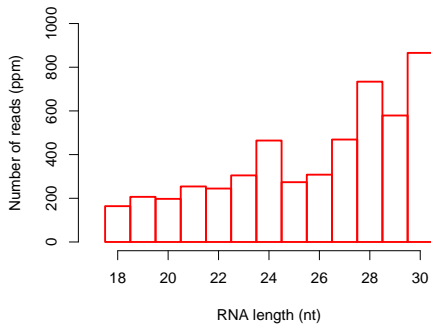

19-mers:

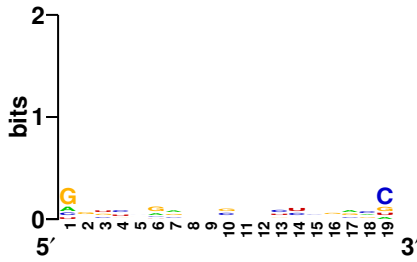

20-mers:

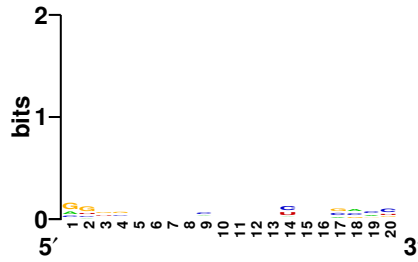

18-mers:

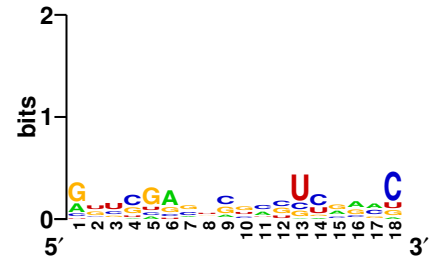

21-mers:

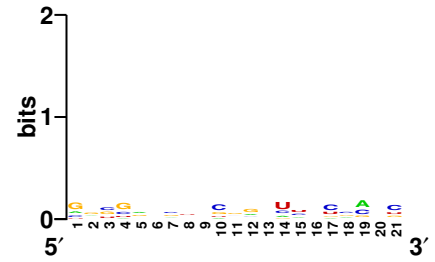

22-mers:

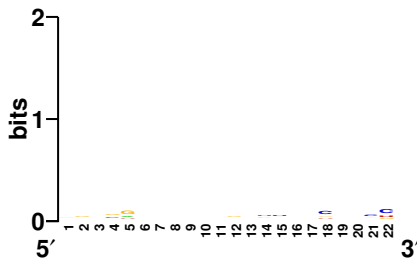

23-mers:

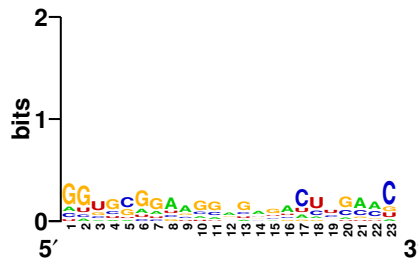

24-mers:

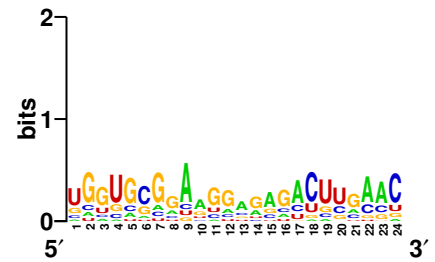

25-mers:

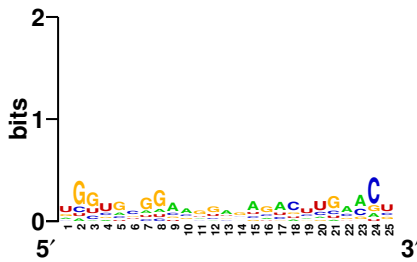

26-mers:

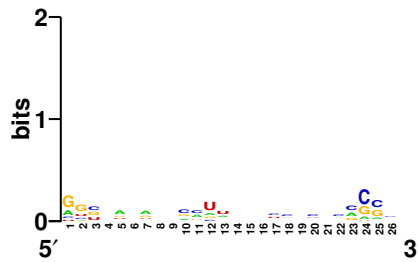

27-mers:

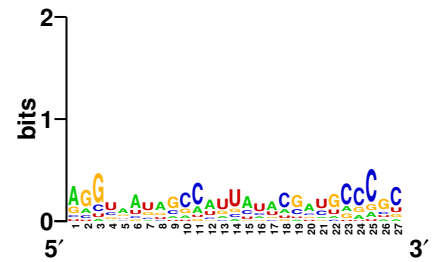

28-mers:

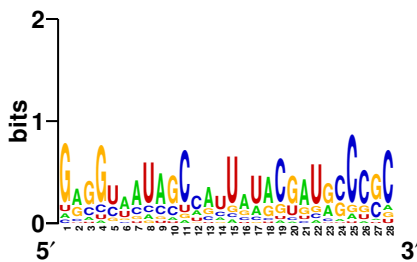

29-mers:

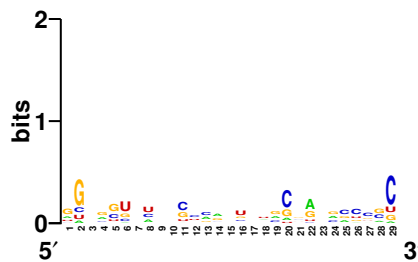

30-mers:

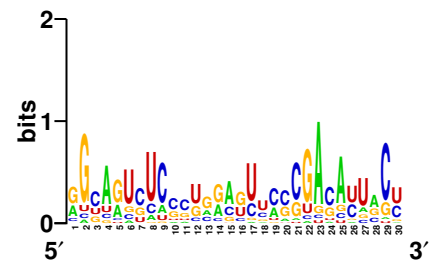

Embryo 36h, library 1:

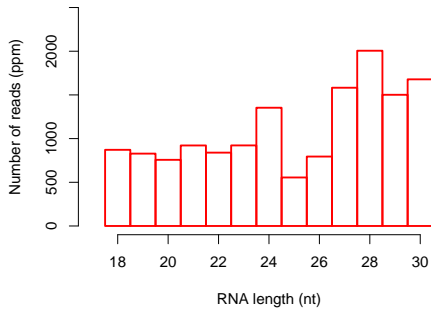

19-mers:

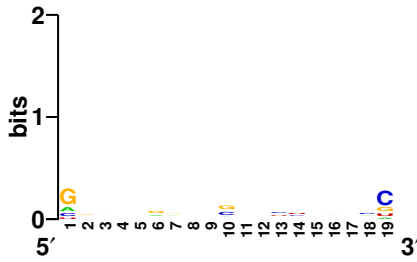

20-mers:

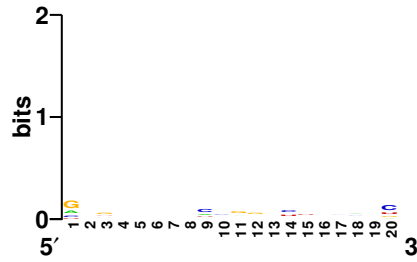

18-mers:

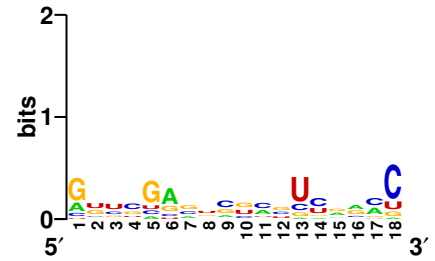

21-mers:

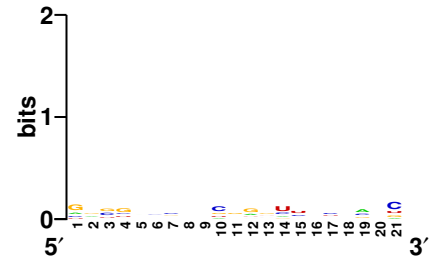

22-mers:

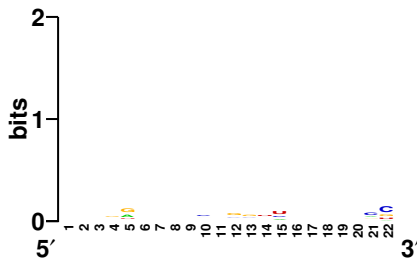

23-mers:

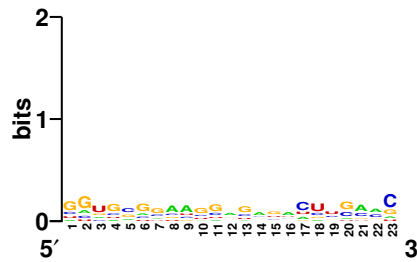

24-mers:

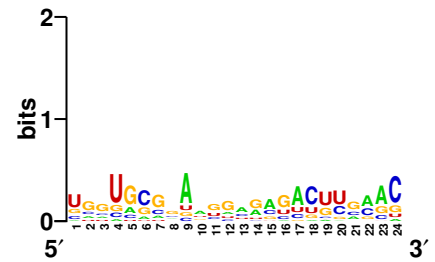

25-mers:

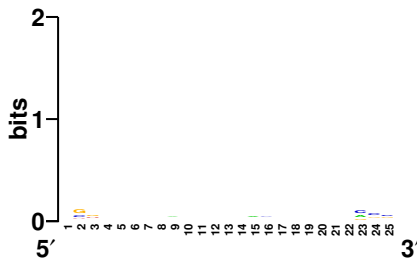

26-mers:

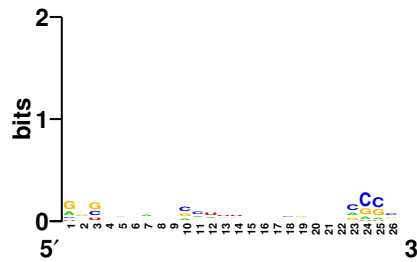

27-mers:

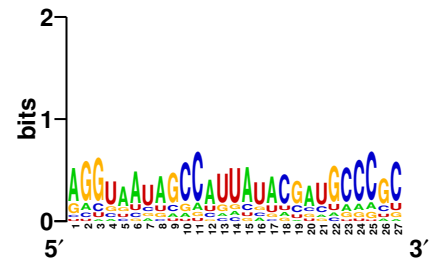

28-mers:

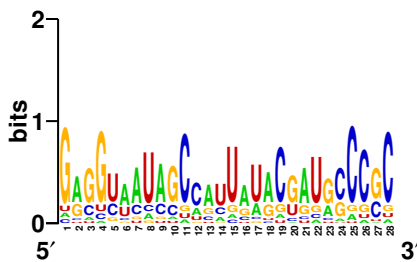

29-mers:

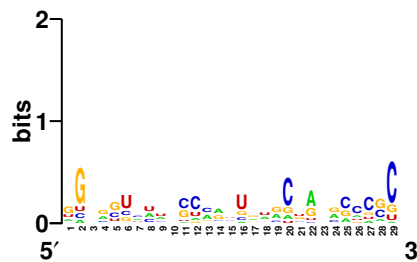

30-mers:

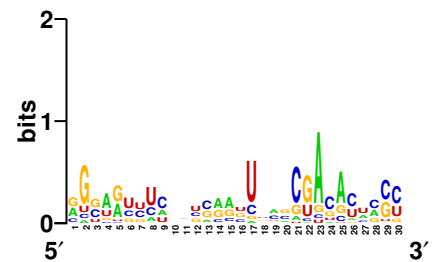

Embryo 60h, library 1:

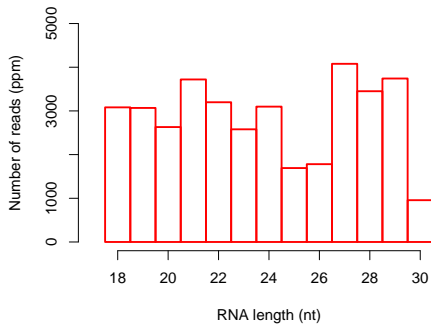

19-mers:

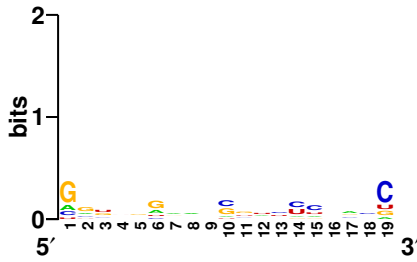

20-mers:

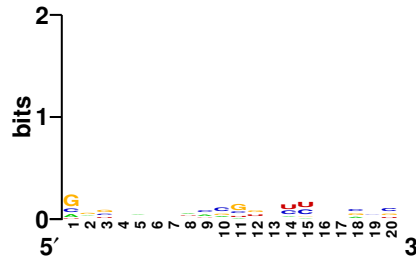

18-mers:

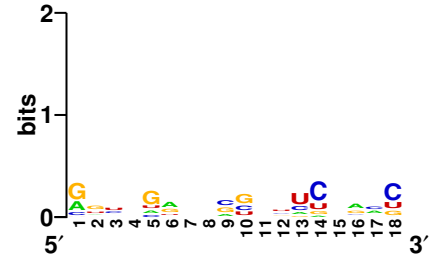

21-mers:

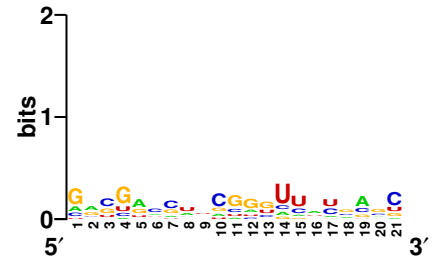

22-mers:

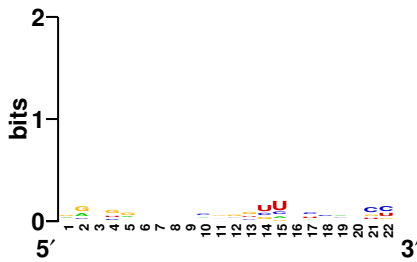

23-mers:

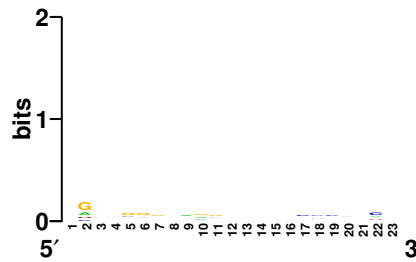

24-mers:

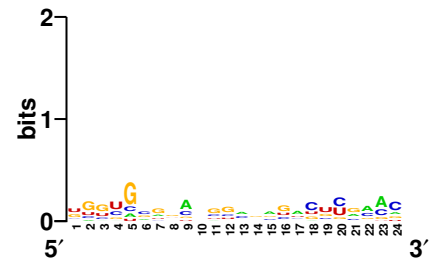

25-mers:

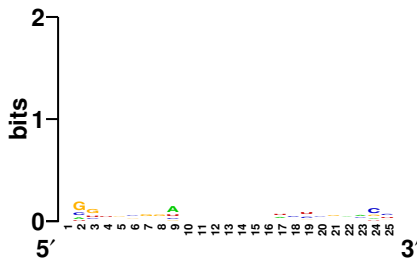

26-mers:

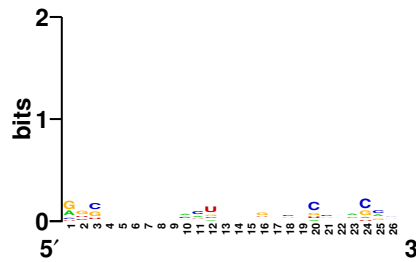

27-mers:

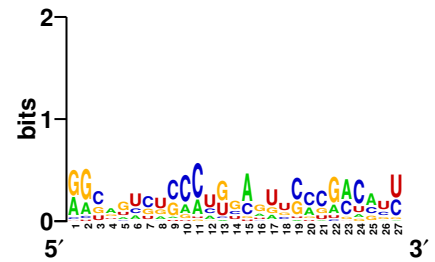

28-mers:

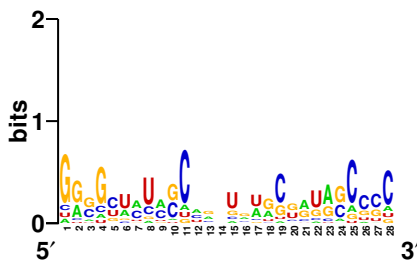

29-mers:

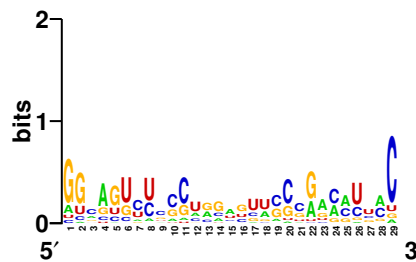

30-mers:

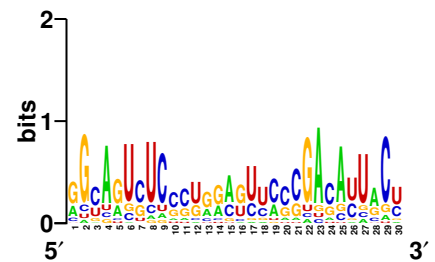

Adult female, library 1:

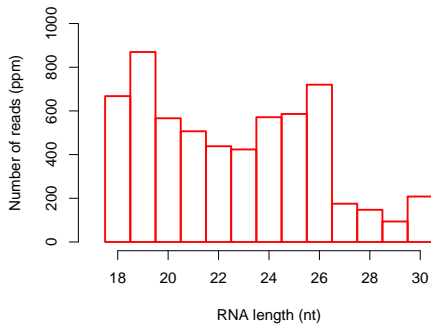

19-mers:

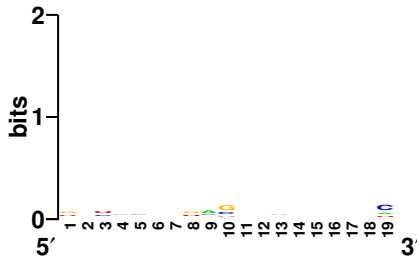

20-mers:

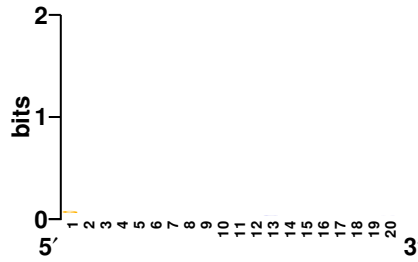

18-mers:

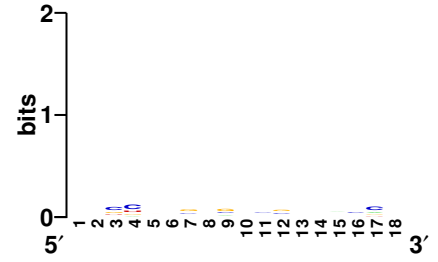

21-mers:

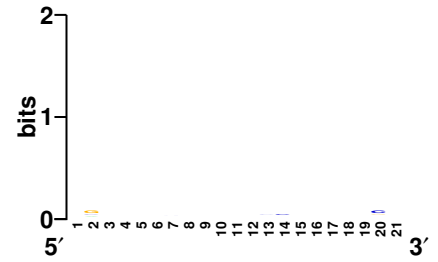

22-mers:

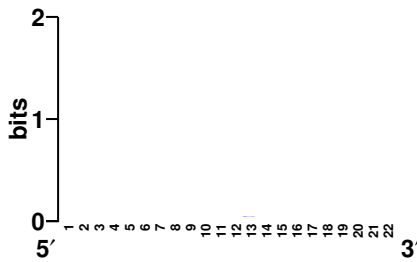

23-mers:

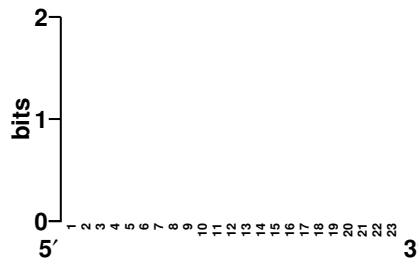

24-mers:

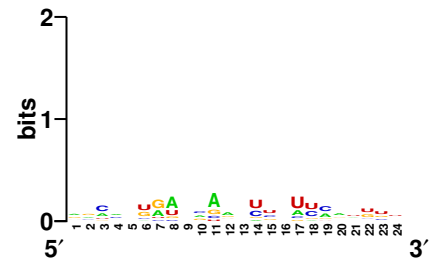

25-mers:

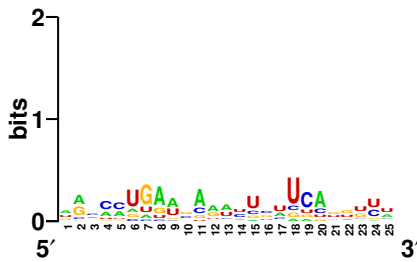

26-mers:

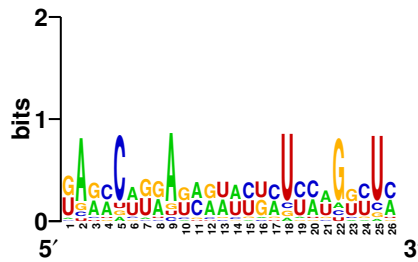

27-mers:

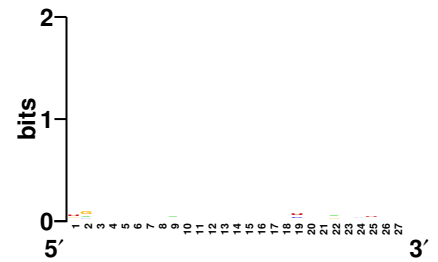

28-mers:

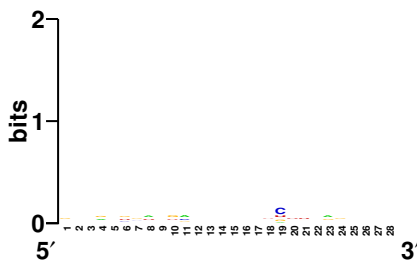

29-mers:

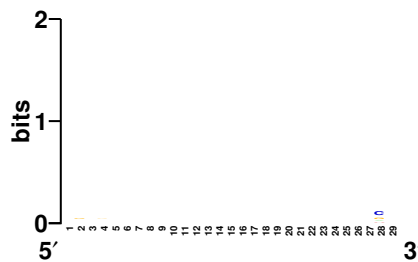

30-mers:

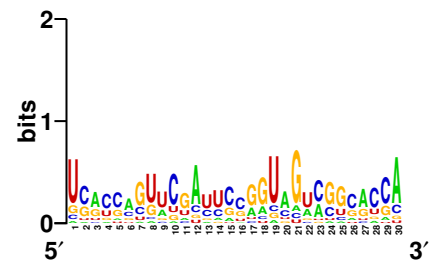

Adult male, library 1:

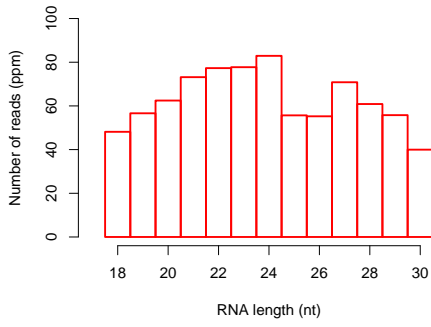

19-mers:

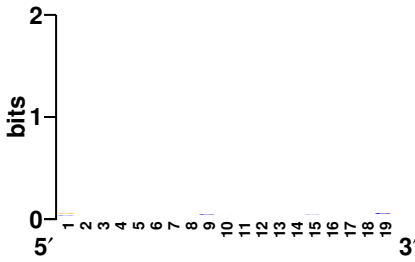

20-mers:

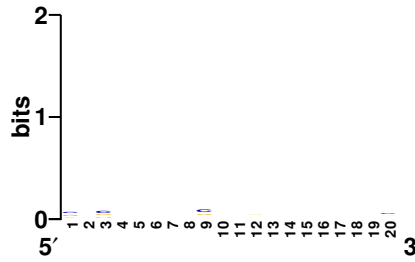

18-mers:

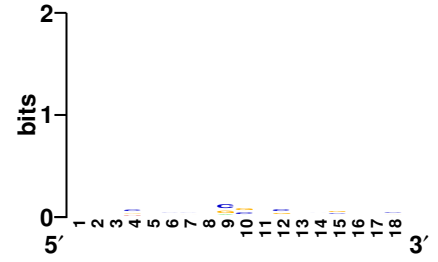

21-mers:

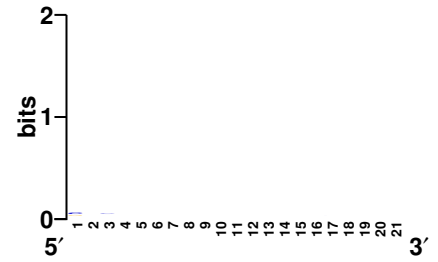

22-mers:

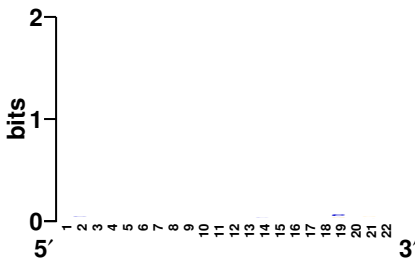

23-mers:

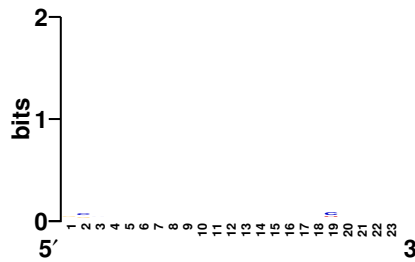

24-mers:

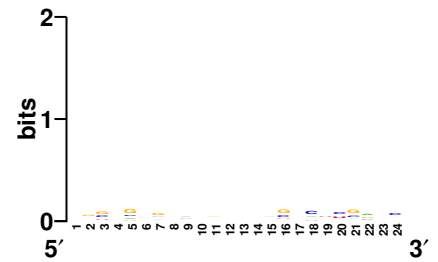

25-mers:

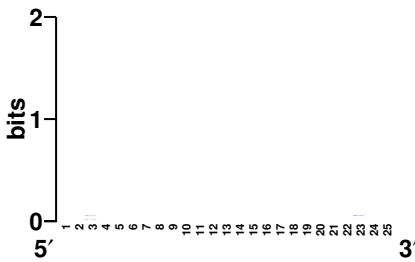

26-mers:

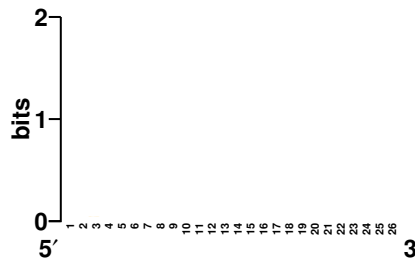

27-mers:

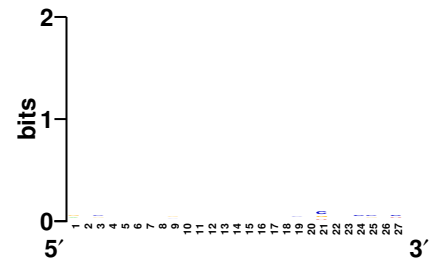

28-mers:

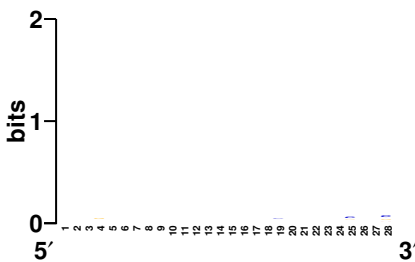

29-mers:

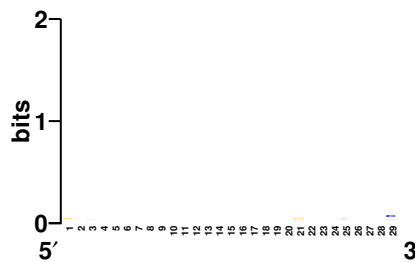

30-mers:

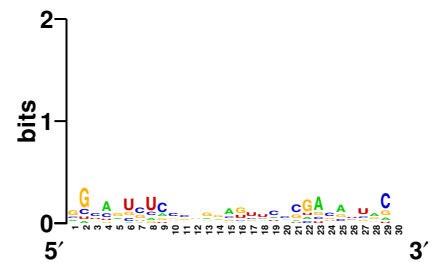

## 8.2 Libraries #2 (3' modified, 5' monophosphorylated small RNAs)

Embryo 8h, library 2:

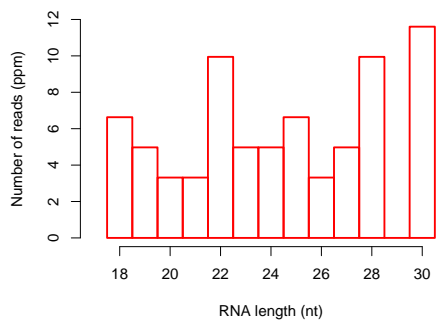

19-mers:

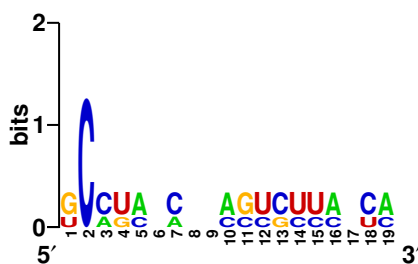

20-mers:

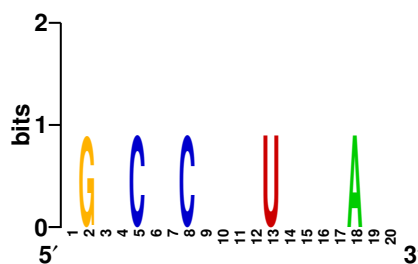

18-mers:

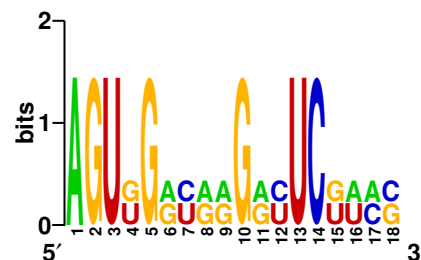

21-mers:

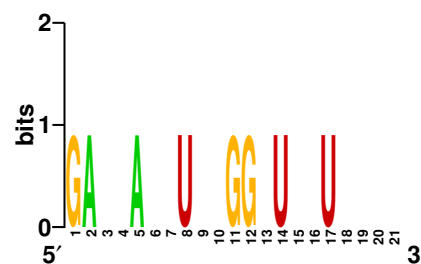

22-mers:

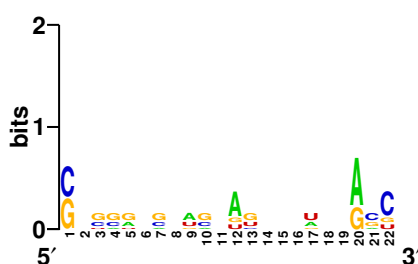

23-mers:

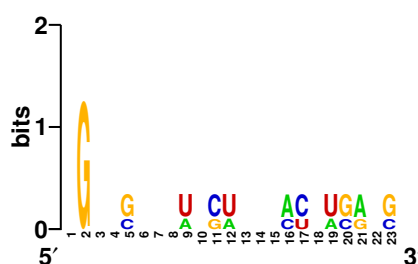

24-mers:

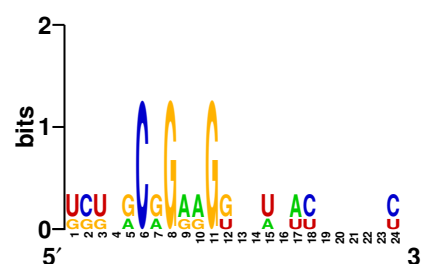

25-mers:

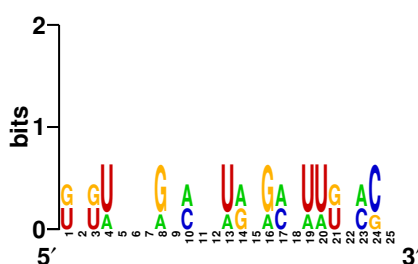

26-mers:

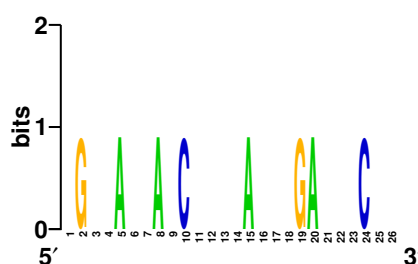

27-mers:

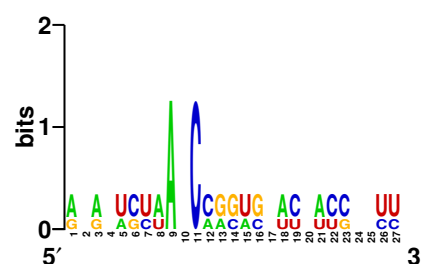

28-mers:

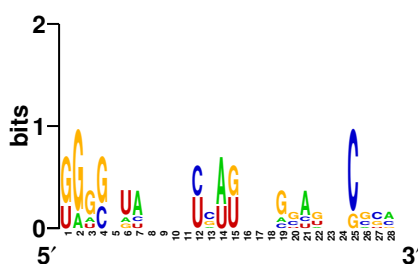

29-mers:

(no read)

30-mers:

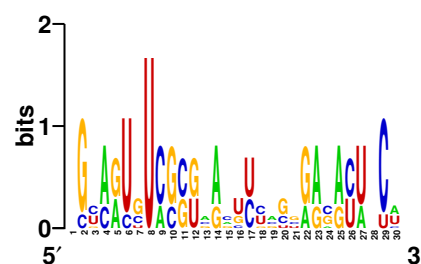

Embryo 15h, library 2:

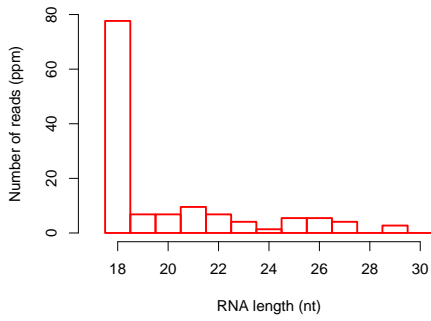

18-mers:

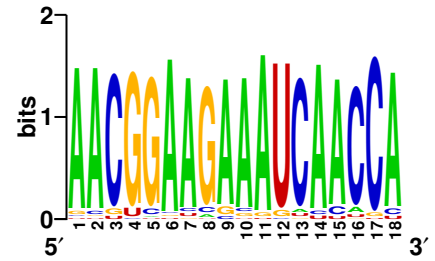

19-mers:

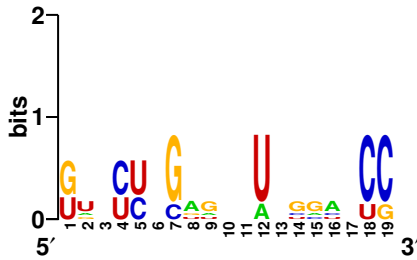

20-mers:

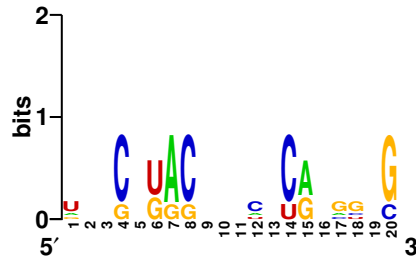

21-mers:

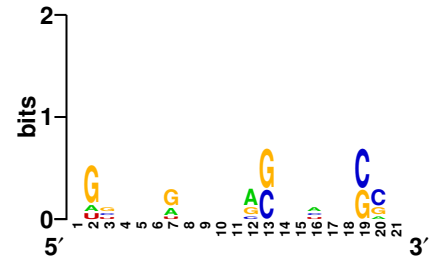

22-mers:

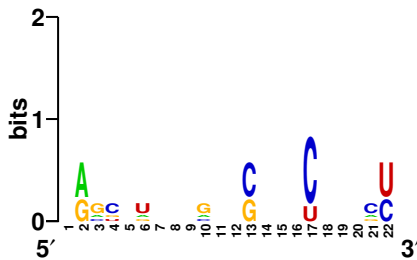

23-mers:

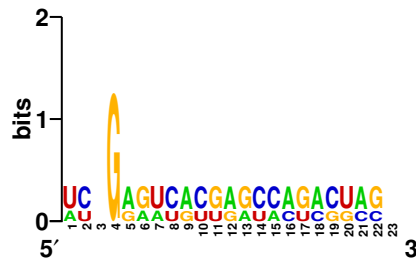

24-mers:

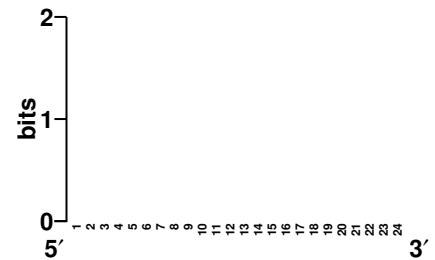

25-mers:

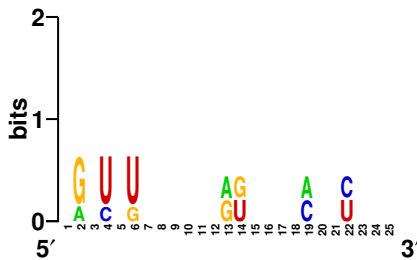

26-mers:

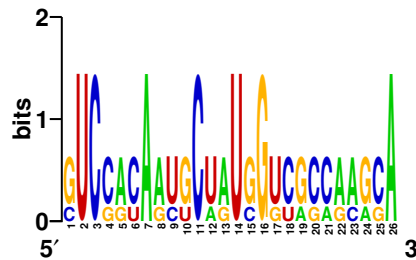

27-mers:

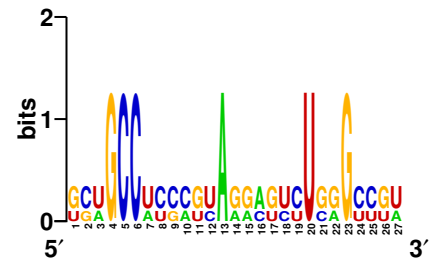

28-mers:

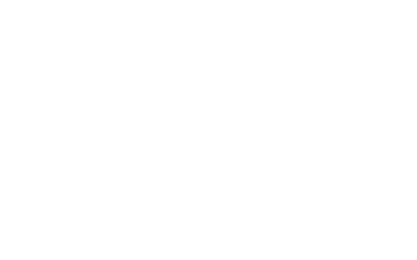

29-mers:

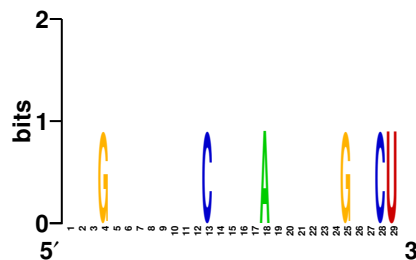

30-mers:

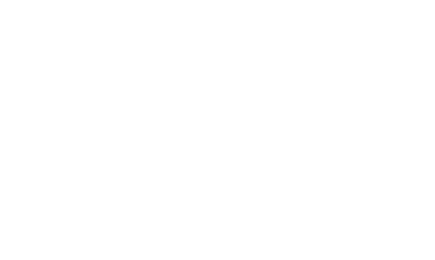

(no read)

(no read)



Embryo 36h, library 2:

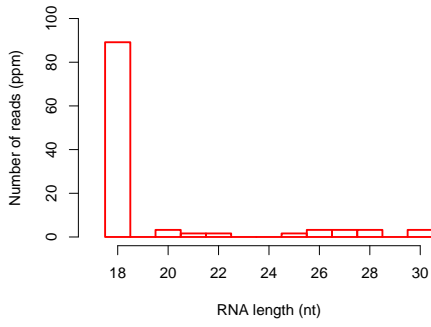

19-mers:

(no read)  
22-mers:

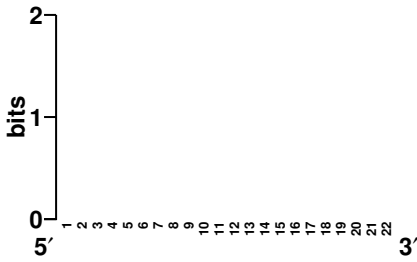

25-mers:

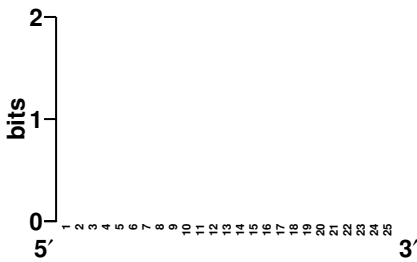

28-mers:

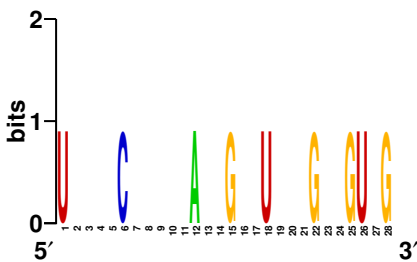

20-mers:

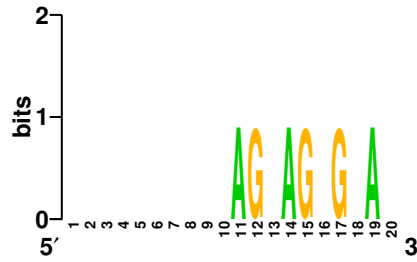

23-mers:

(no read)  
26-mers:

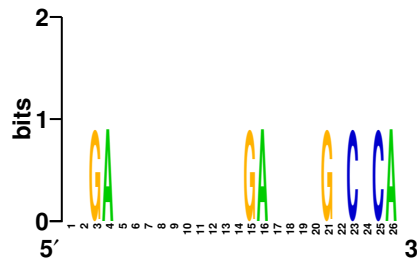

29-mers:

(no read)

18-mers:

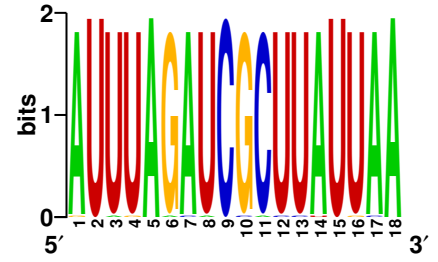

21-mers:

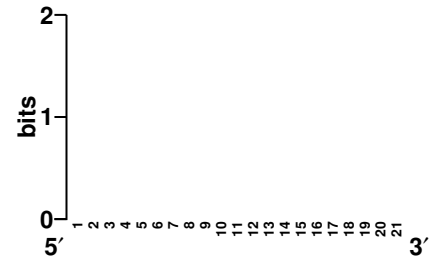

24-mers:

(no read)  
27-mers:

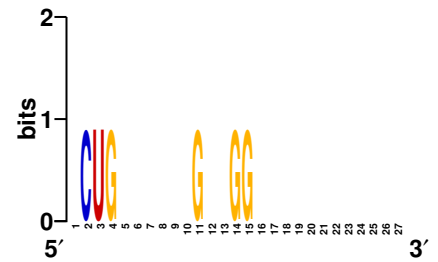

30-mers:

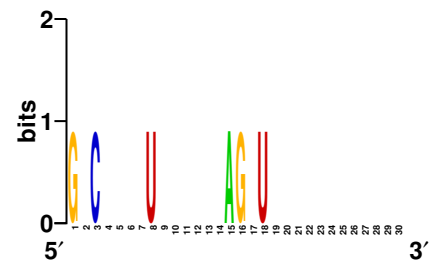

Embryo 60h, library 2:

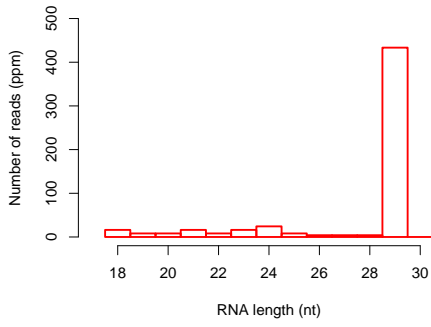

19-mers:

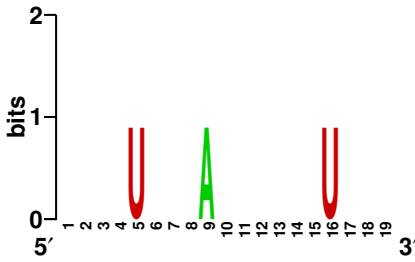

20-mers:

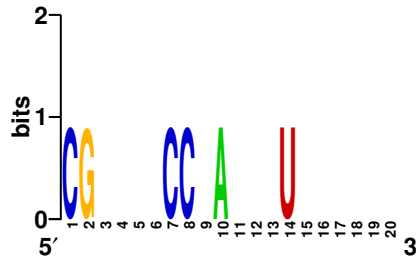

18-mers:

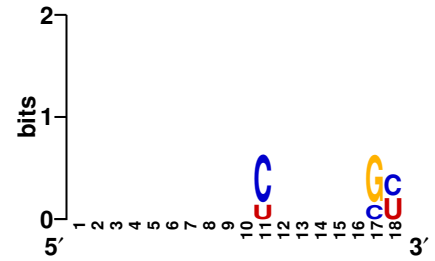

21-mers:

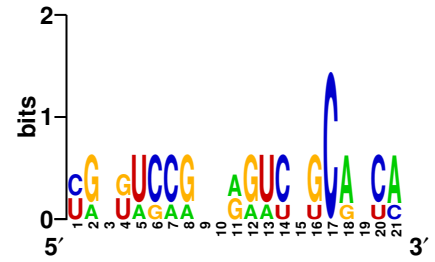

22-mers:

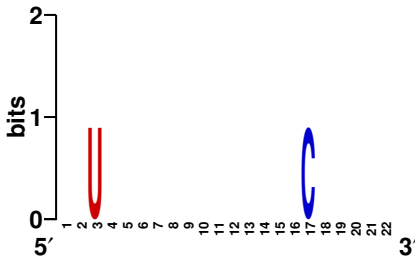

23-mers:

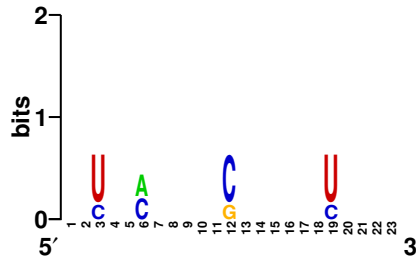

24-mers:

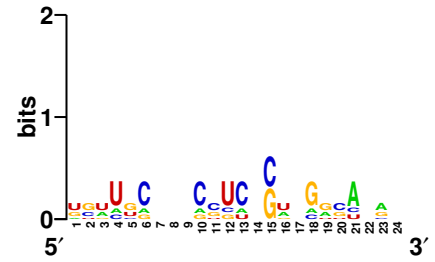

25-mers:

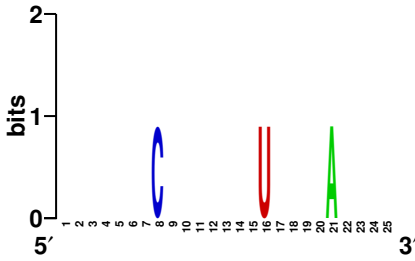

26-mers:

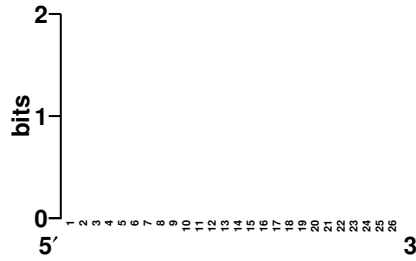

27-mers:

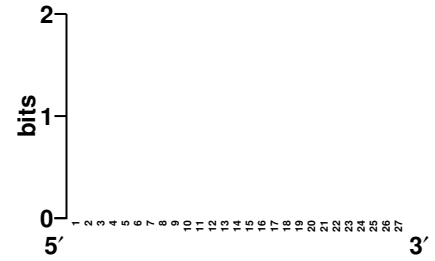

28-mers:

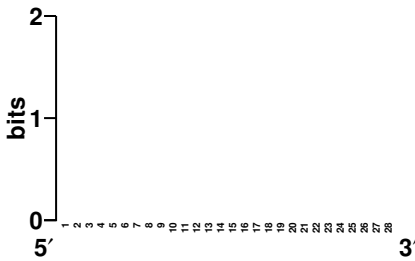

29-mers:

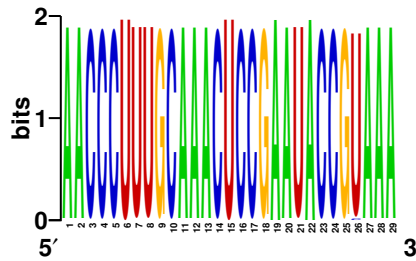

30-mers:

(no read)

Adult female, library 2:

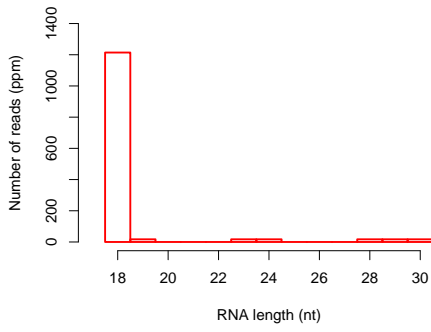

19-mers:

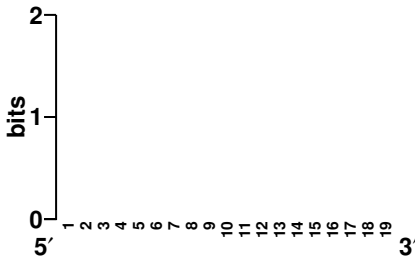

22-mers:

(no read)  
25-mers:  
(no read)  
28-mers:

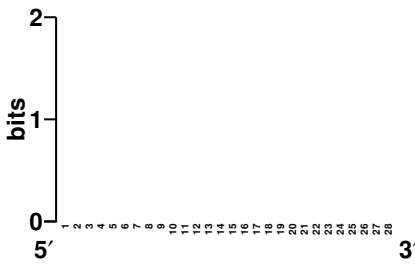

20-mers:

(no read)  
23-mers:

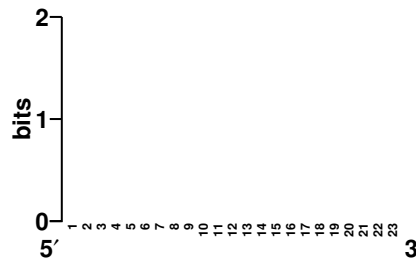

26-mers:  
(no read)  
29-mers:

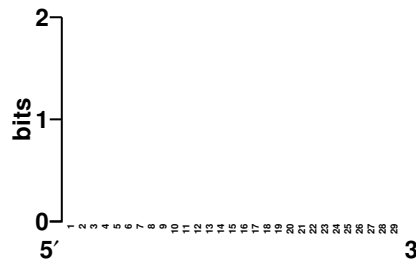

18-mers:

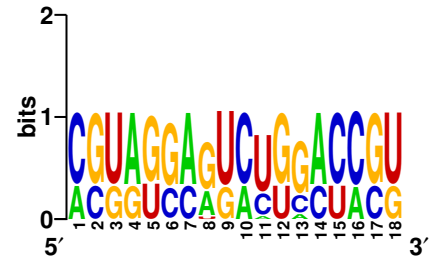

21-mers:

(no read)  
24-mers:

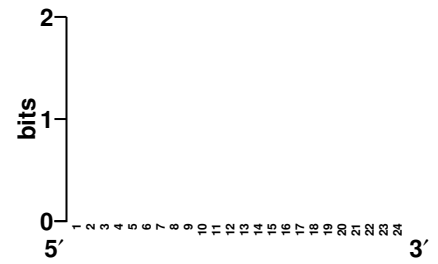

27-mers:  
(no read)  
30-mers:

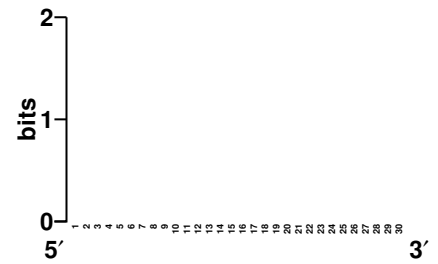

Adult male, library 2:

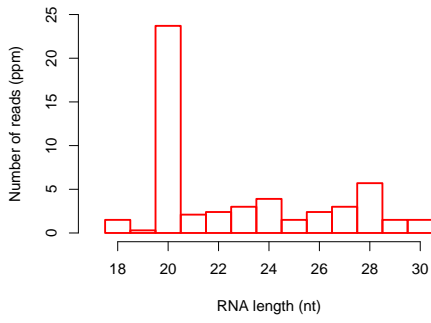

19-mers:

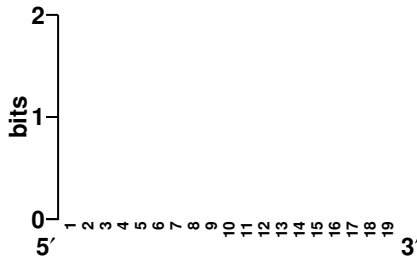

20-mers:

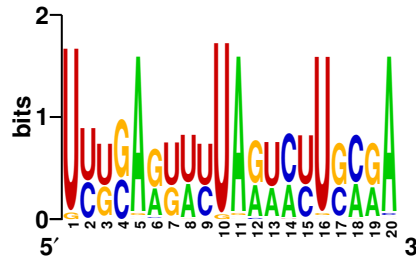

18-mers:

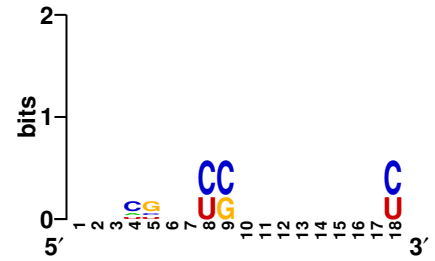

21-mers:

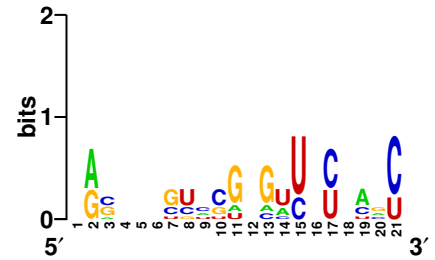

22-mers:

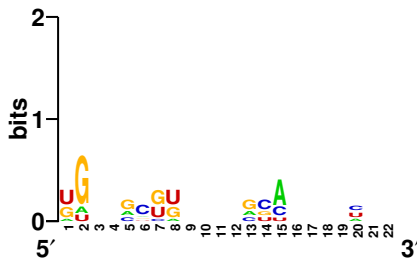

23-mers:

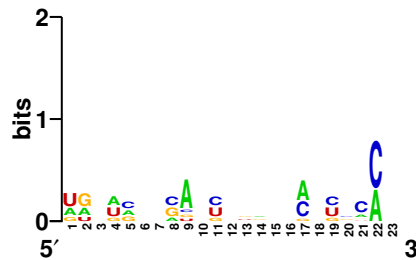

24-mers:

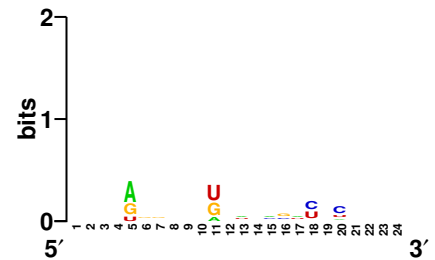

25-mers:

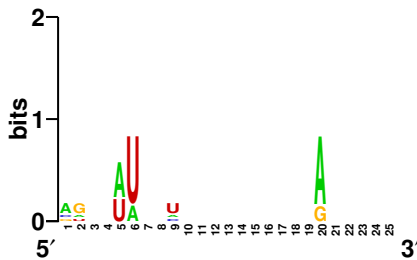

26-mers:

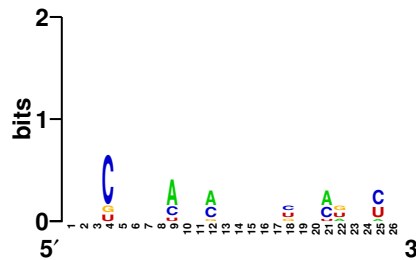

27-mers:

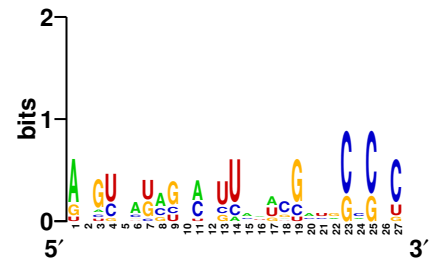

28-mers:

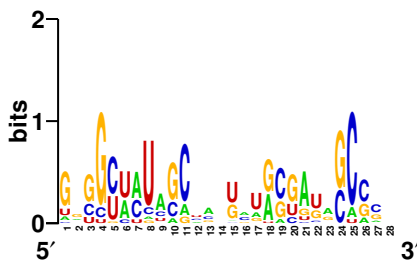

29-mers:

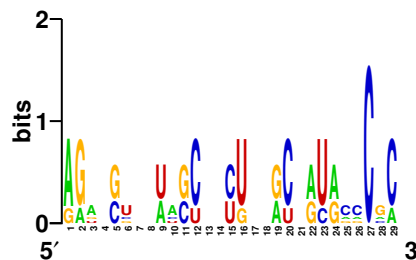

30-mers:

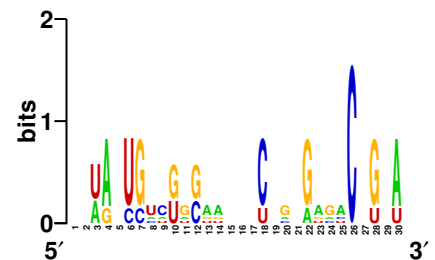

### 8.3 Libraries #3 (total 5' hydroxyl or polyphosphorylated small RNAs)

Embryo 8h, library 3:

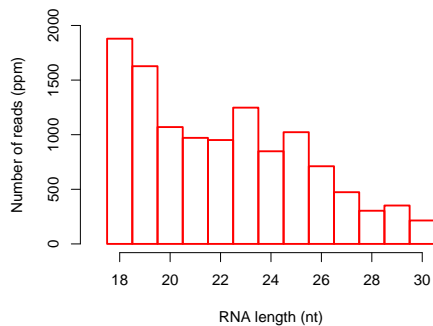

18-mers:

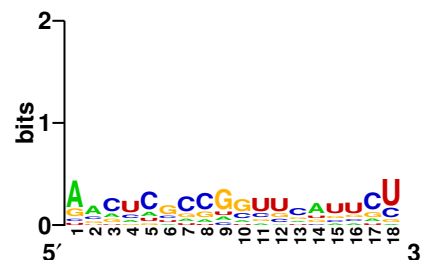

19-mers:

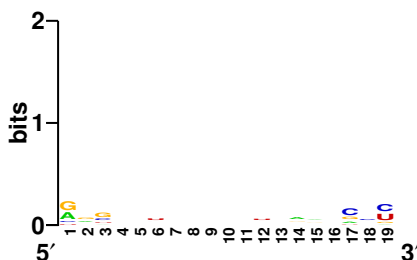

20-mers:

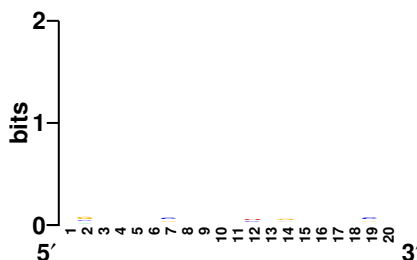

21-mers:

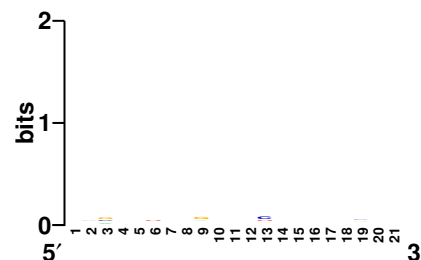

22-mers:

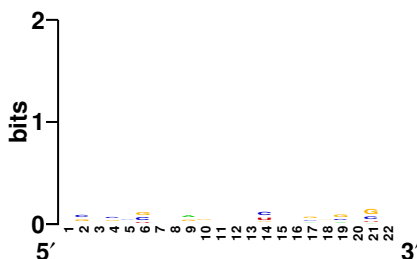

23-mers:

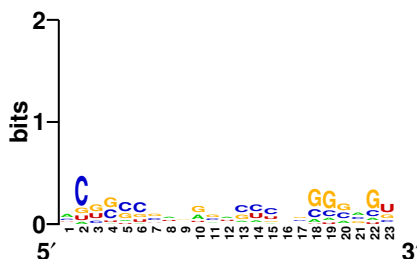

24-mers:

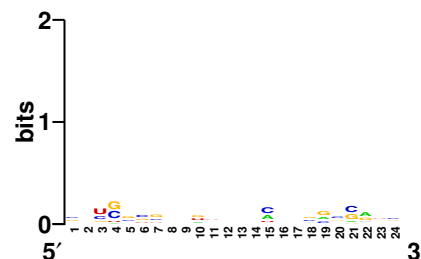

25-mers:

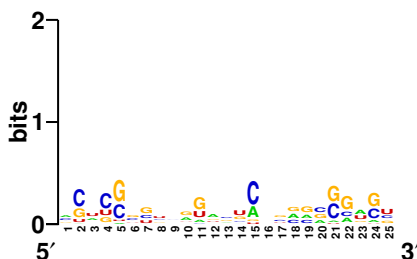

26-mers:

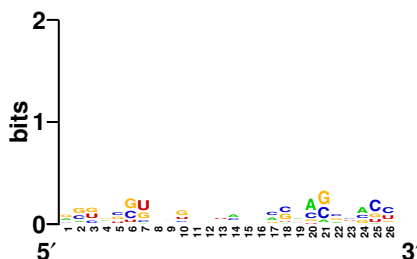

27-mers:

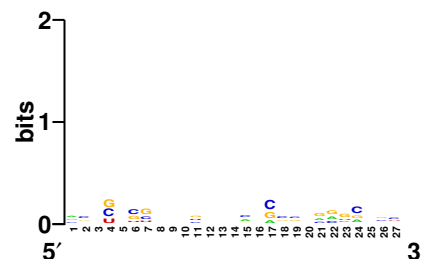

28-mers:

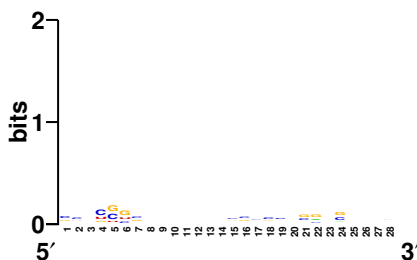

29-mers:

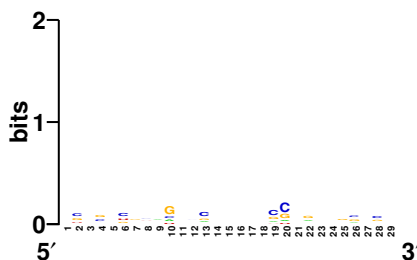

30-mers:

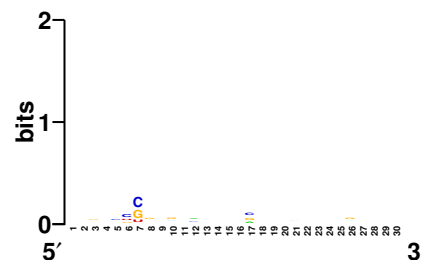

Embryo 15h, library 3:

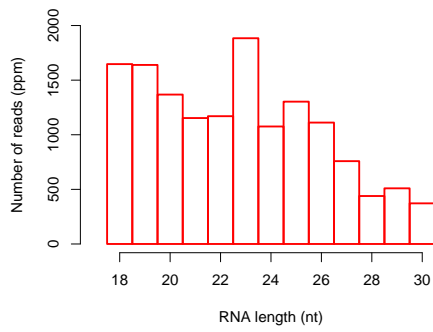

19-mers:

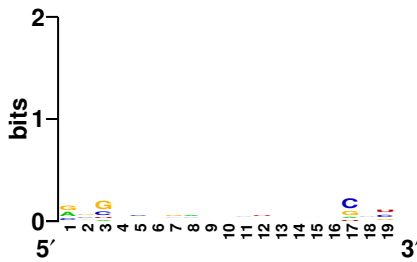

20-mers:

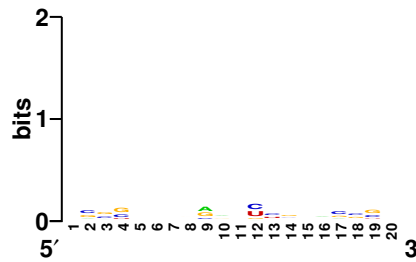

18-mers:

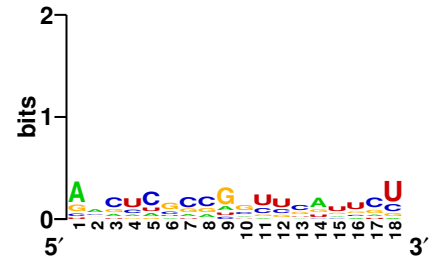

21-mers:

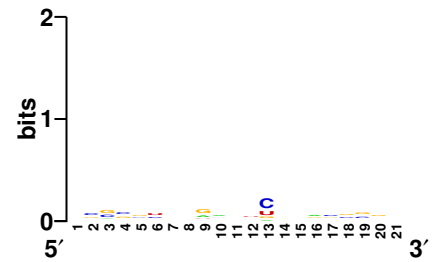

22-mers:

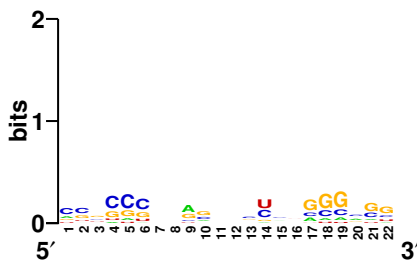

23-mers:

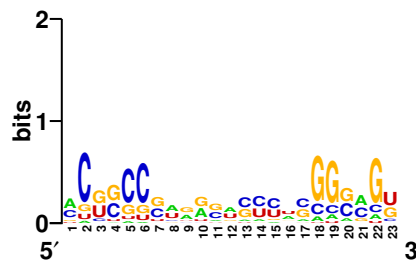

24-mers:

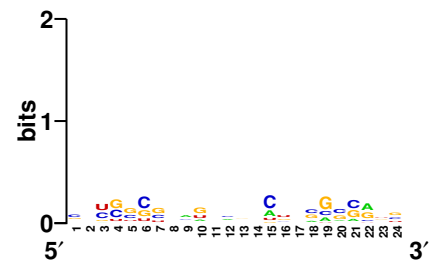

25-mers:

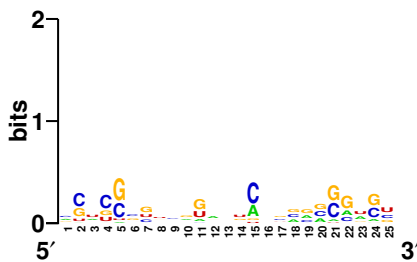

26-mers:

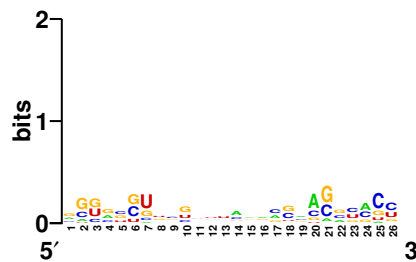

27-mers:

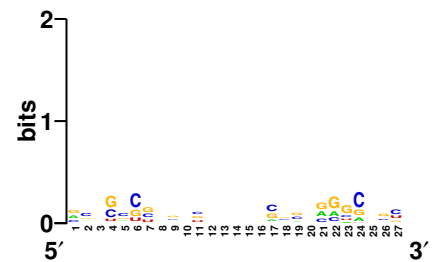

28-mers:

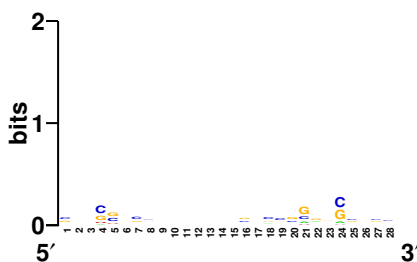

29-mers:

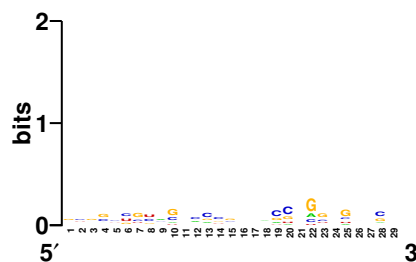

30-mers:

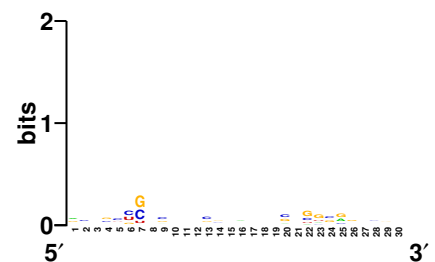

Embryo 36h, library 3:

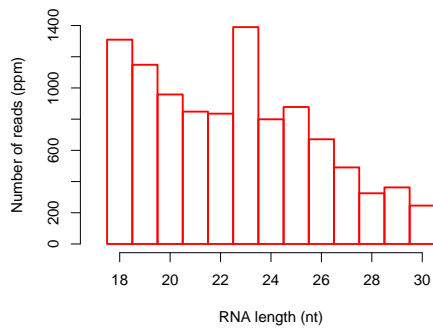

19-mers:

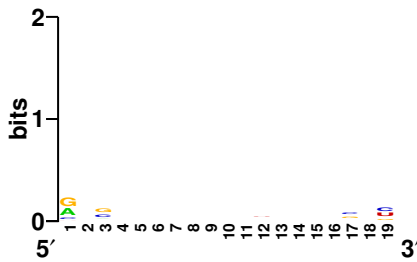

20-mers:

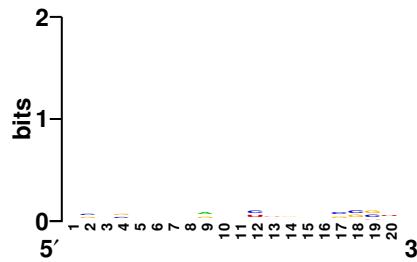

18-mers:

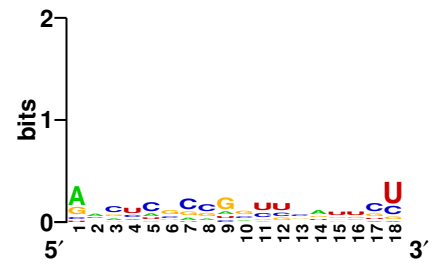

21-mers:

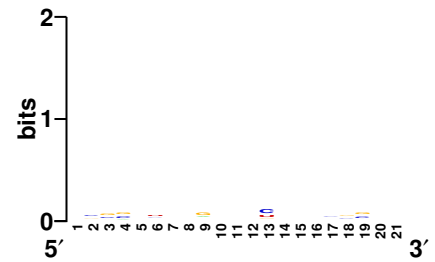

22-mers:

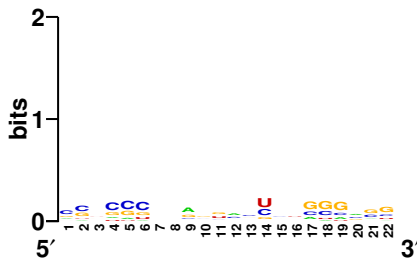

23-mers:

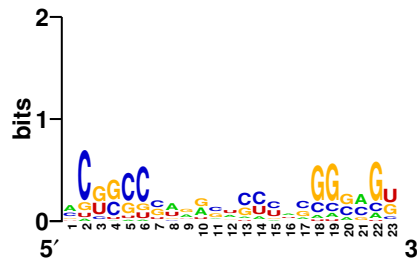

24-mers:

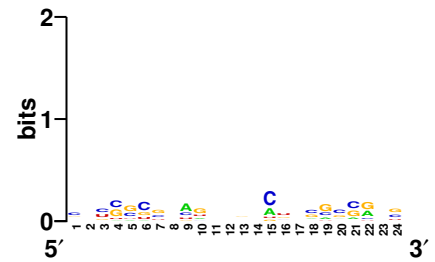

25-mers:

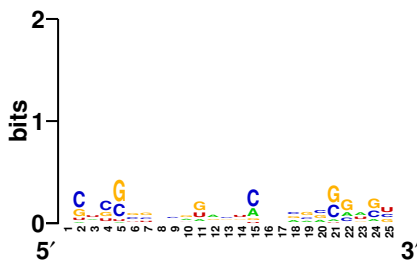

26-mers:

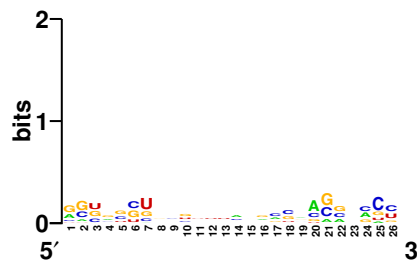

27-mers:

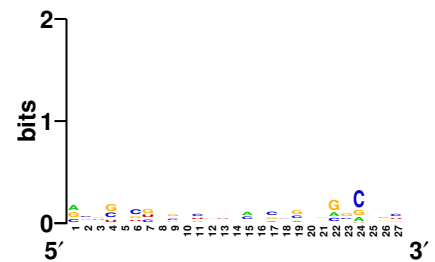

28-mers:

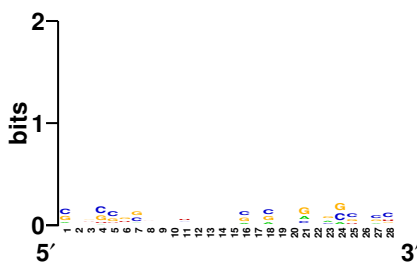

29-mers:

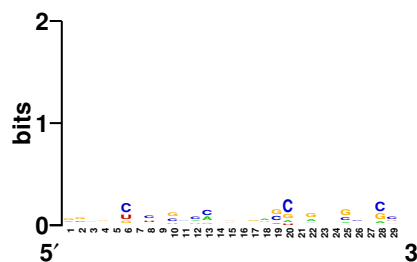

30-mers:

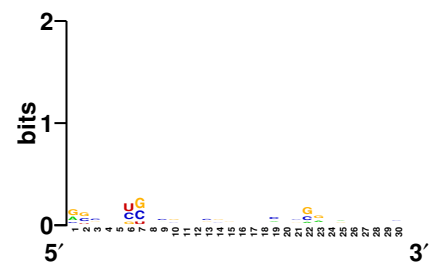

Embryo 60h, library 3:

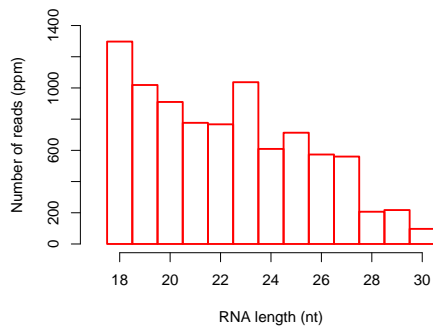

19-mers:

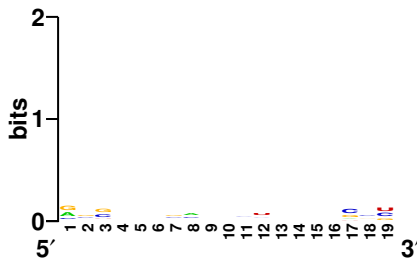

20-mers:

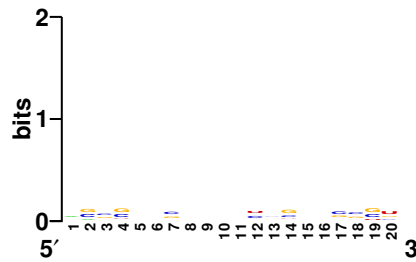

18-mers:

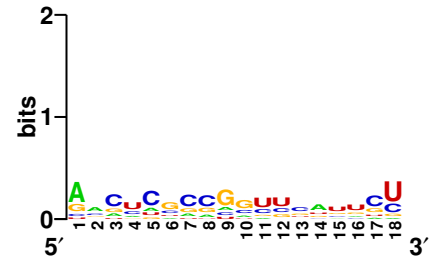

21-mers:

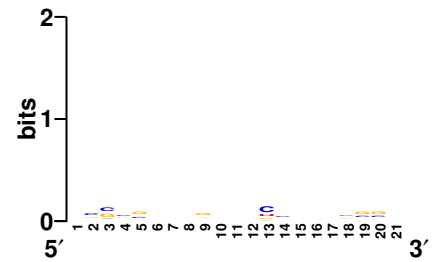

22-mers:

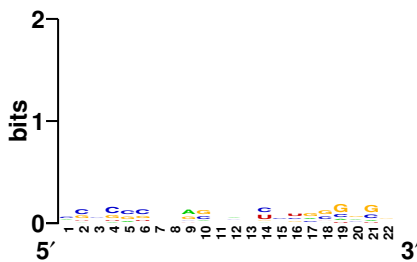

23-mers:

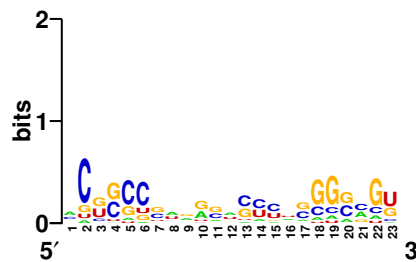

24-mers:

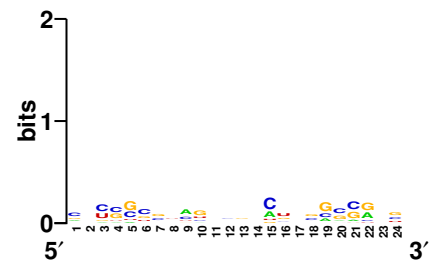

25-mers:

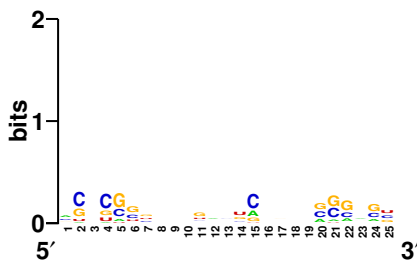

26-mers:

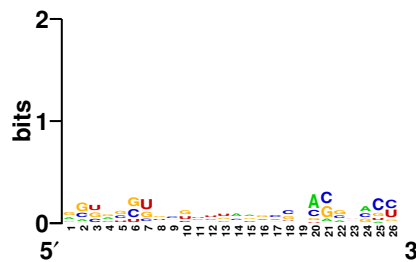

27-mers:

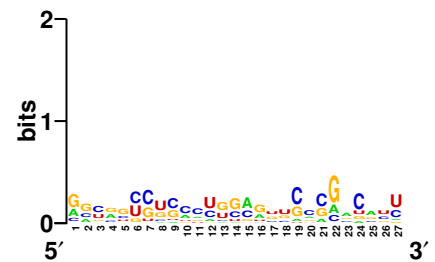

28-mers:

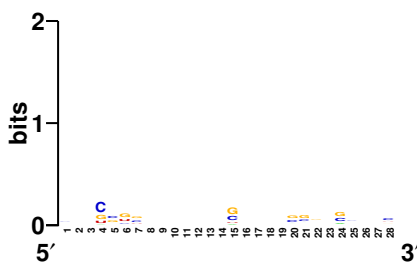

29-mers:

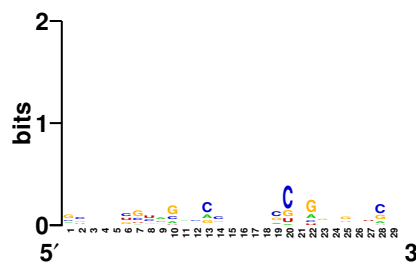

30-mers:

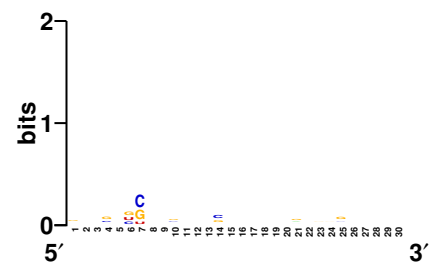



Adult female, library 3:

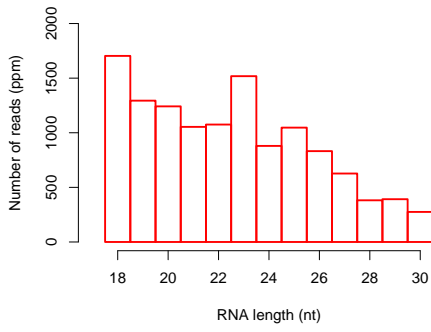

19-mers:

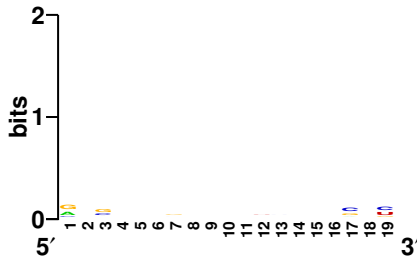

20-mers:

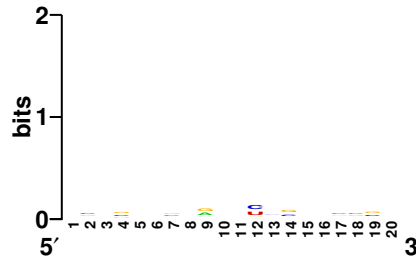

21-mers:

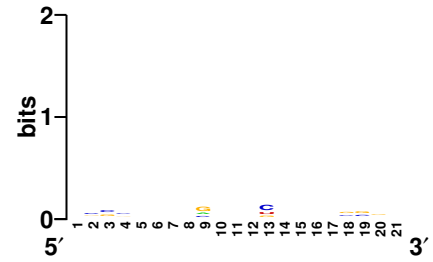

22-mers:

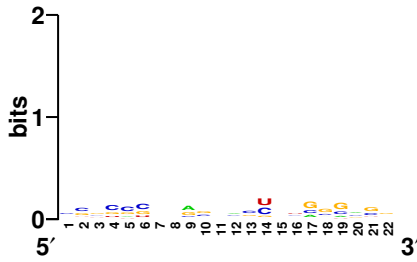

23-mers:

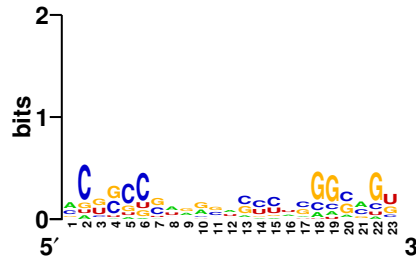

24-mers:

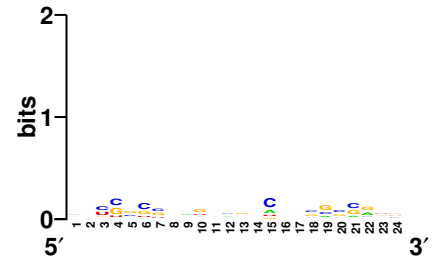

25-mers:

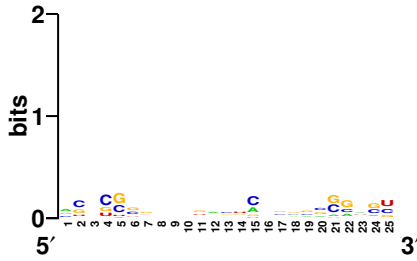

26-mers:

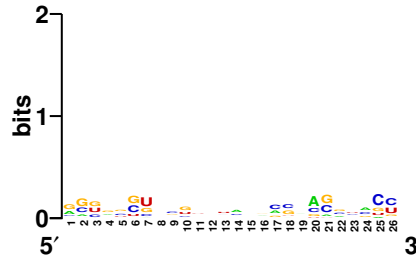

27-mers:

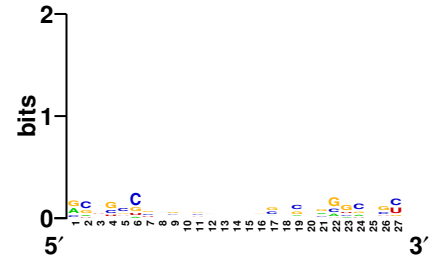

28-mers:

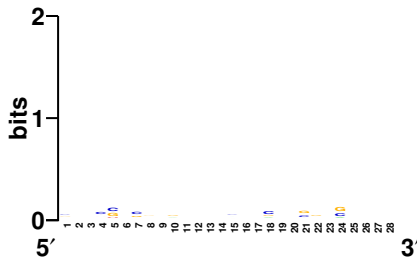

29-mers:

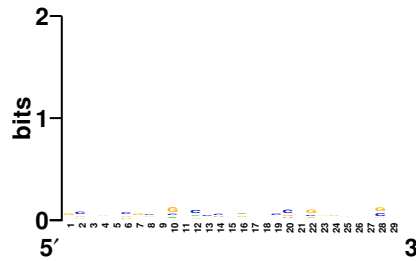

30-mers:

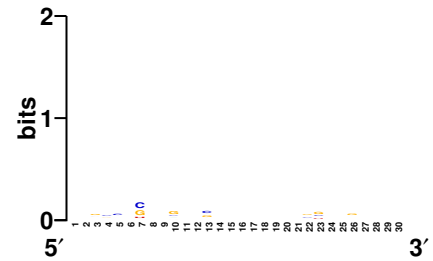

Adult male, library 3:

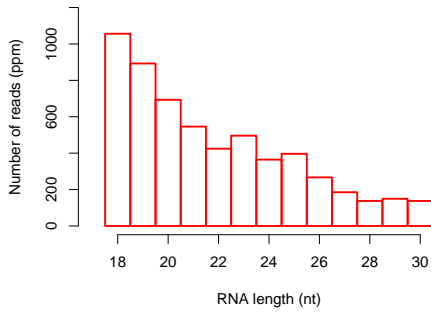

19-mers:

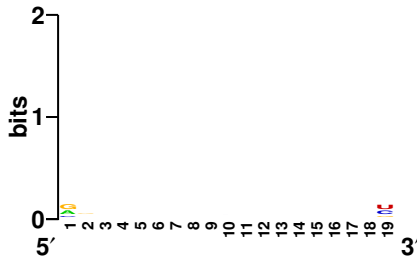

20-mers:

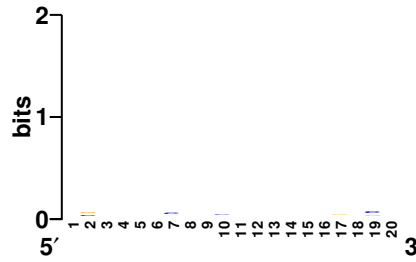

18-mers:

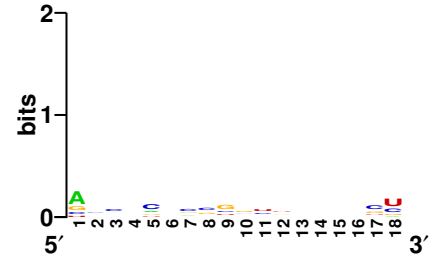

21-mers:

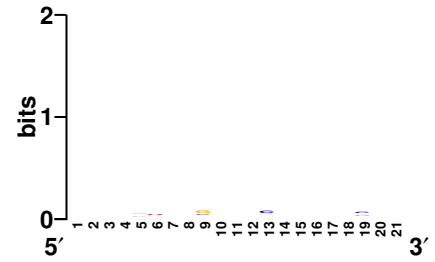

22-mers:

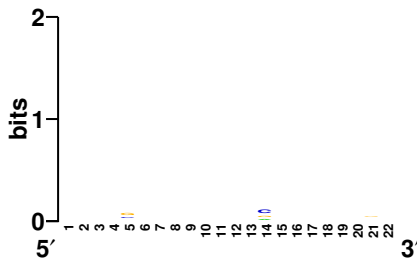

23-mers:

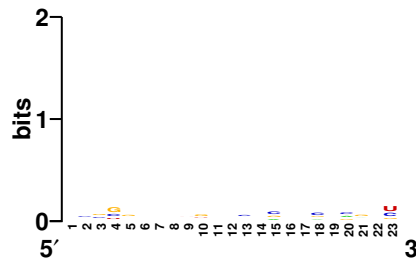

24-mers:

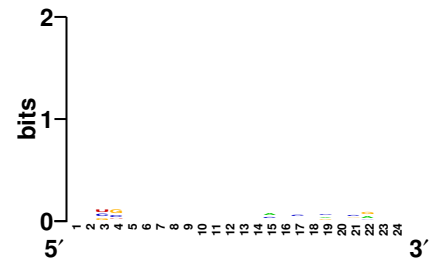

25-mers:

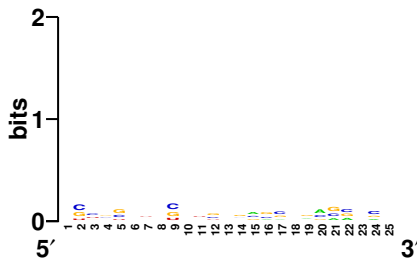

26-mers:

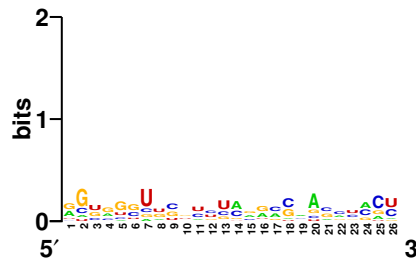

27-mers:

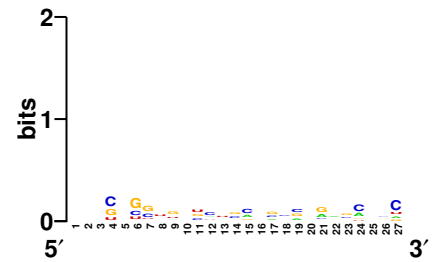

28-mers:

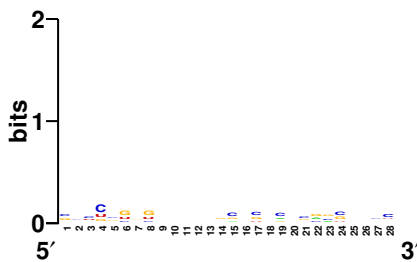

29-mers:

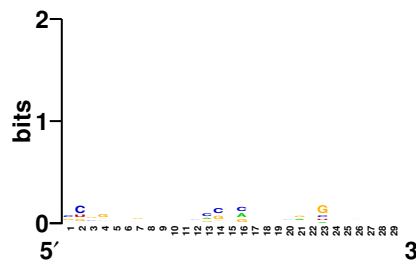

30-mers:

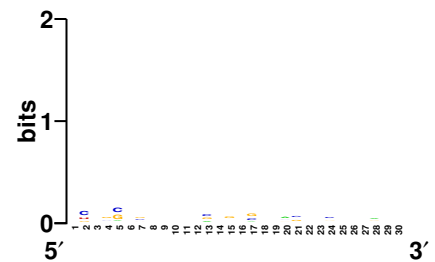

## 8.4 Libraries #4 (3' modified, 5' hydroxyl or polyphosphorylated small RNAs)

Embryo 8h, library 4:

18-mers:

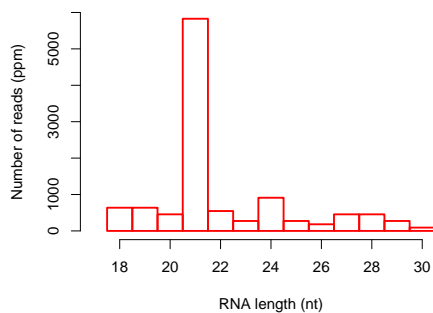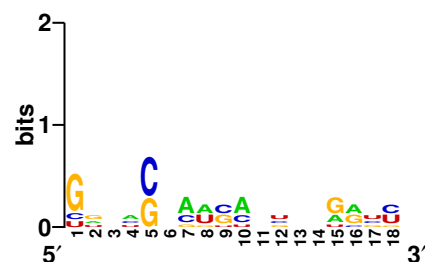

19-mers:

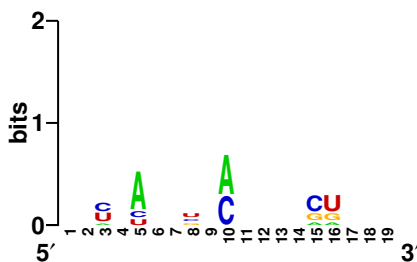

20-mers:

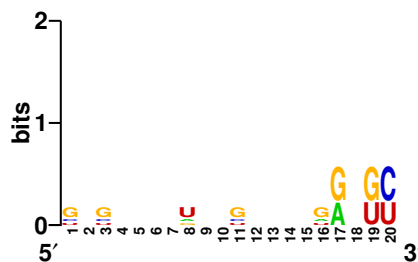

21-mers:

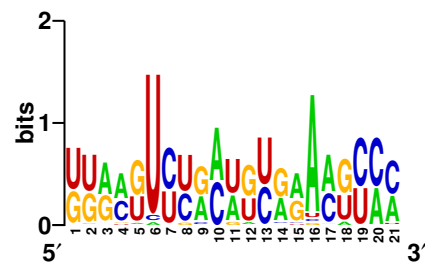

22-mers:

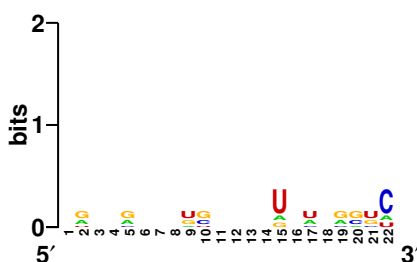

23-mers:

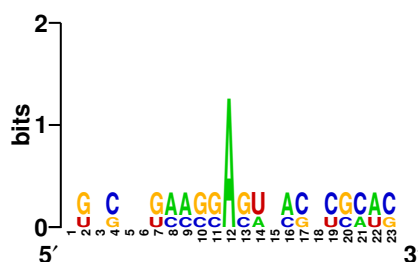

24-mers:

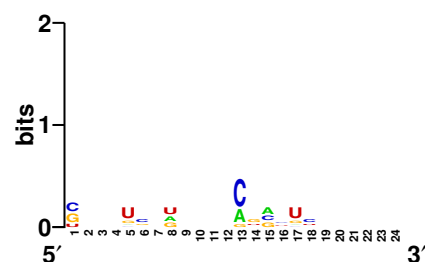

25-mers:

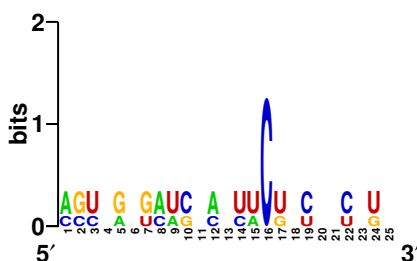

26-mers:

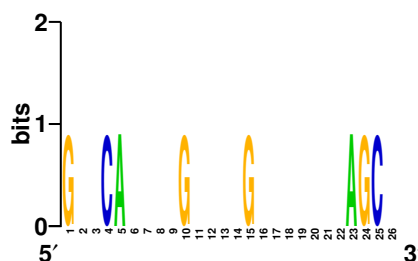

27-mers:

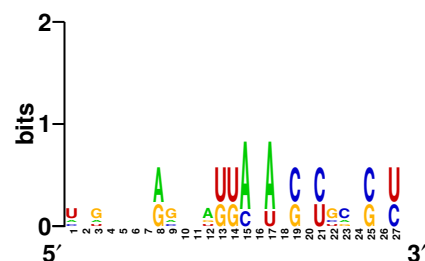

28-mers:

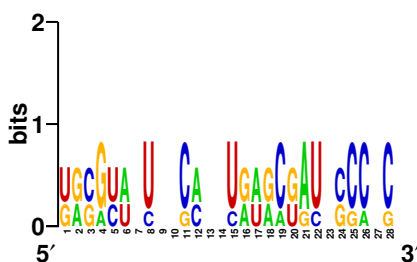

29-mers:

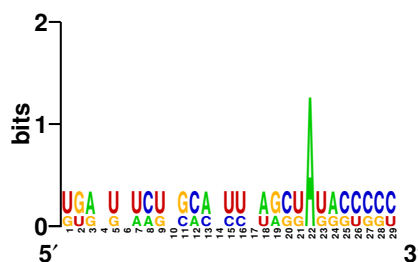

30-mers:

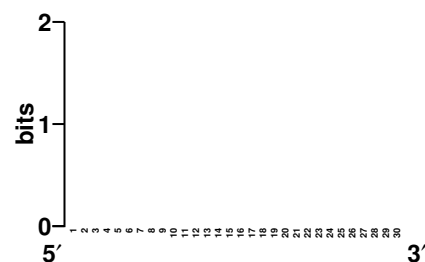

Embryo 15h, library 4:

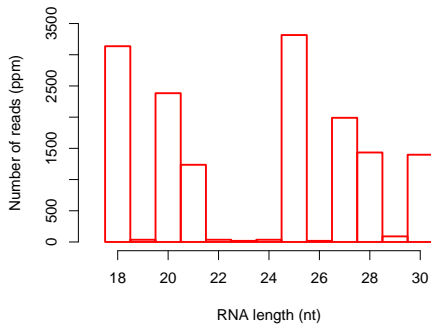

19-mers:

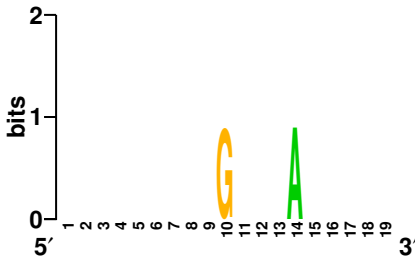

20-mers:

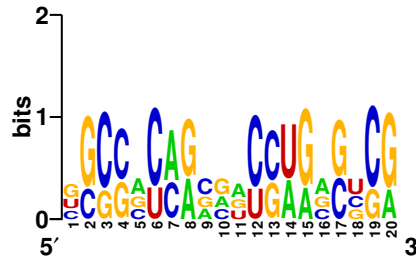

18-mers:

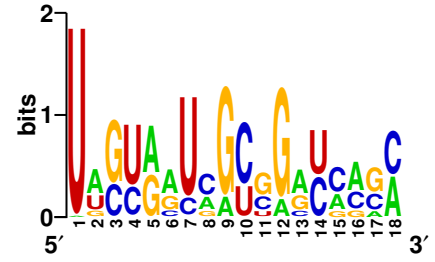

21-mers:

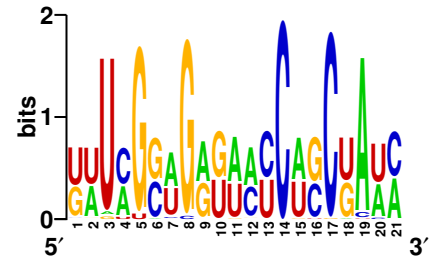

22-mers:

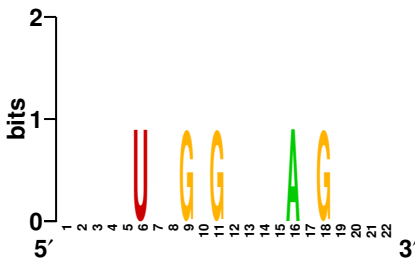

23-mers:

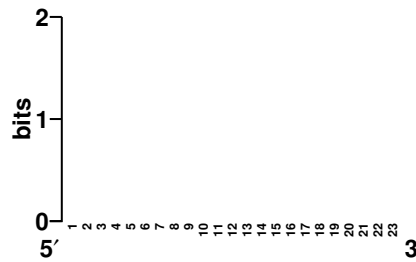

24-mers:

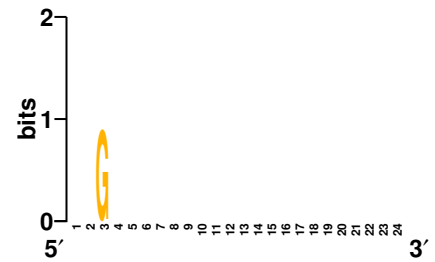

25-mers:

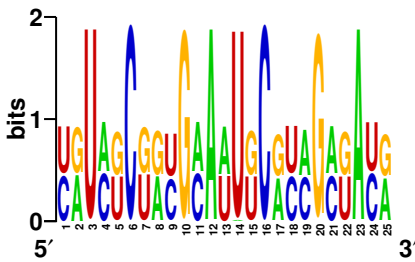

26-mers:

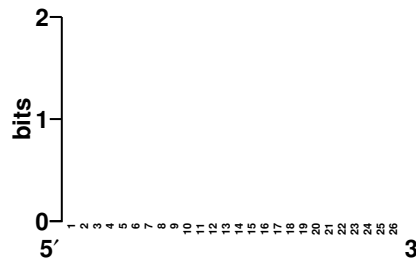

27-mers:

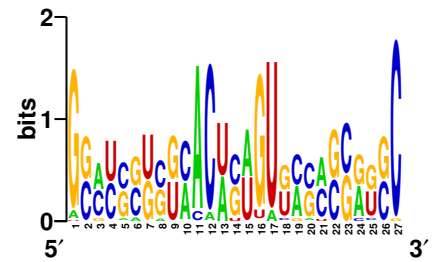

28-mers:

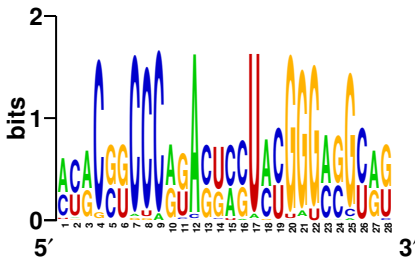

29-mers:

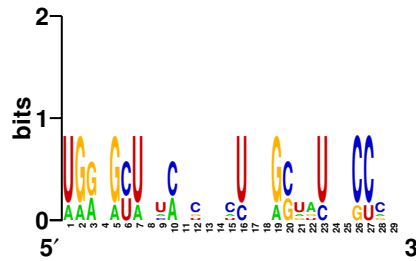

30-mers:

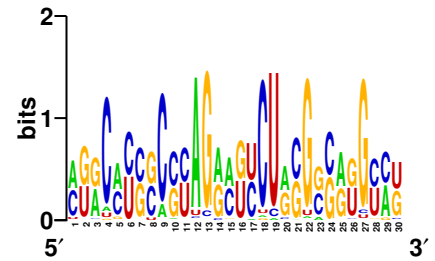

Embryo 36h, library 4:

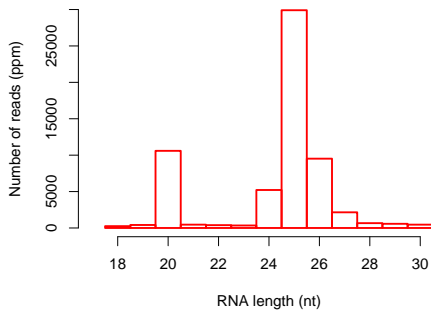

19-mers:

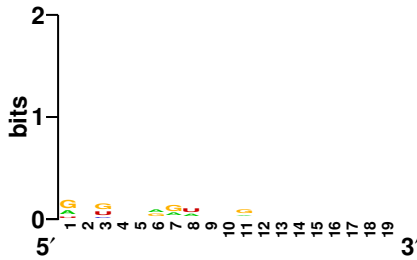

20-mers:

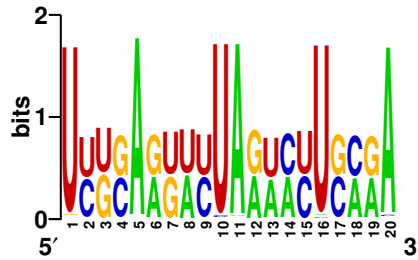

18-mers:

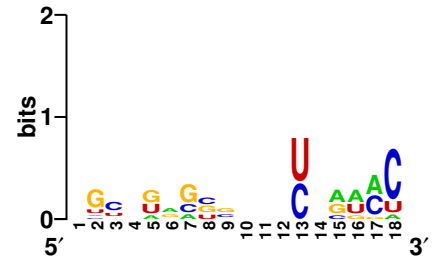

21-mers:

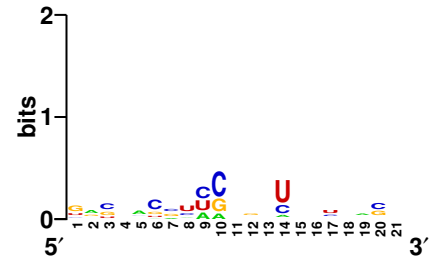

22-mers:

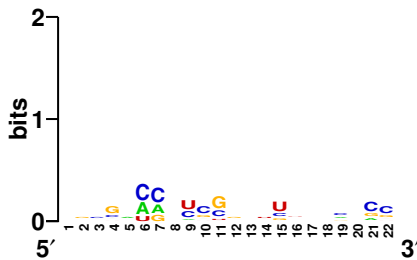

23-mers:

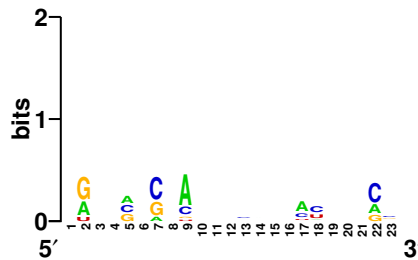

24-mers:

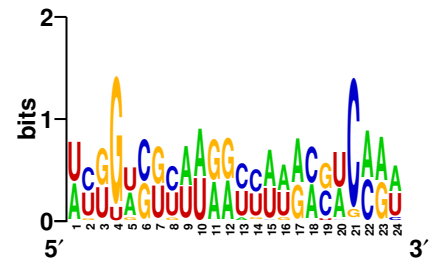

25-mers:

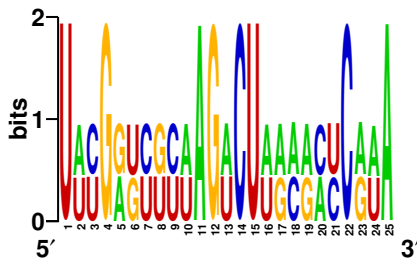

26-mers:

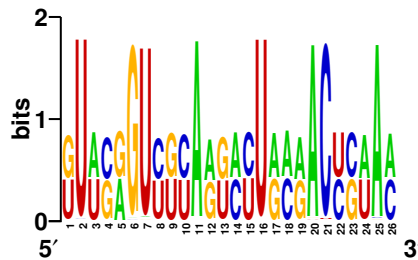

27-mers:

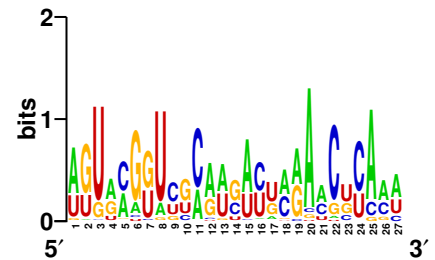

28-mers:

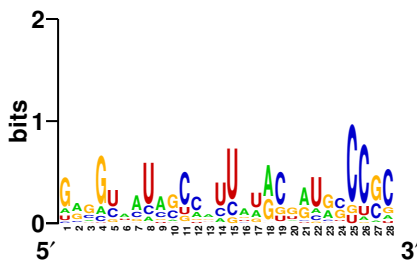

29-mers:

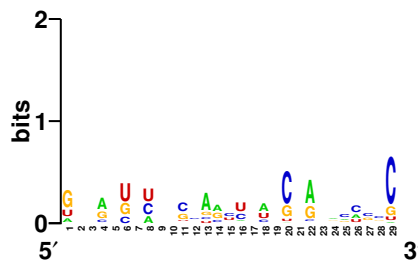

30-mers:

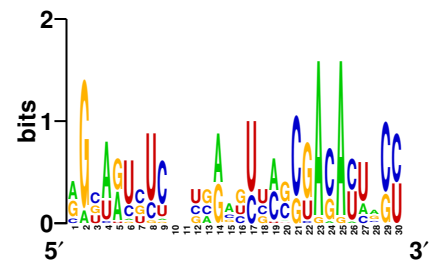

Embryo 60h, library 4:

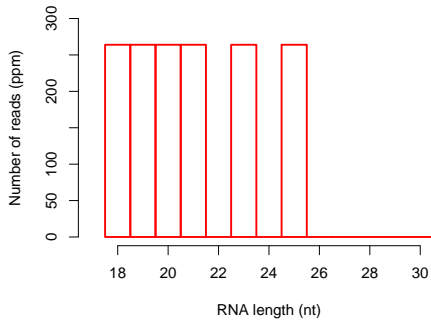

19-mers:

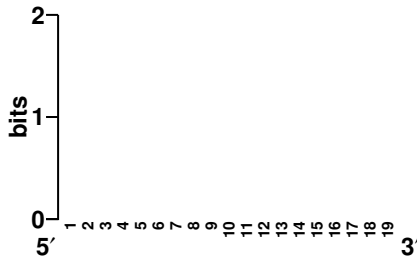

22-mers:

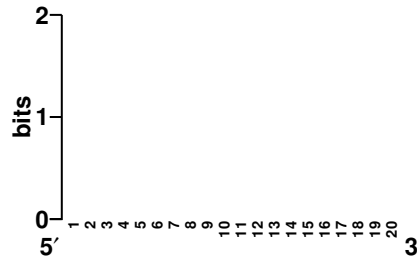

20-mers:

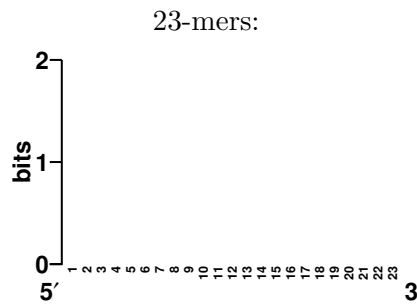

23-mers:

18-mers:

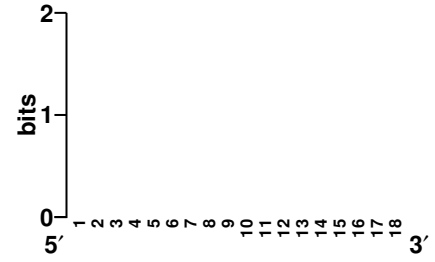

21-mers:

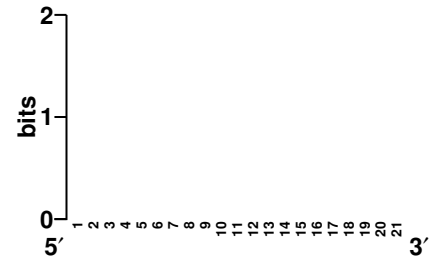

24-mers:

(no read)  
25-mers:

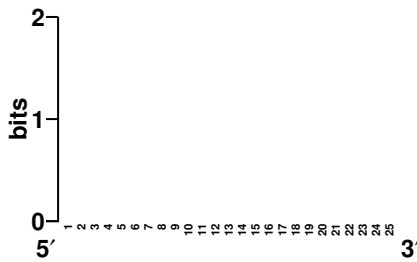

26-mers:

(no read)

29-mers:

(no read)

(no read)  
27-mers:

(no read)

30-mers:

(no read)

28-mers:  
(no read)

Adult female, library 4:

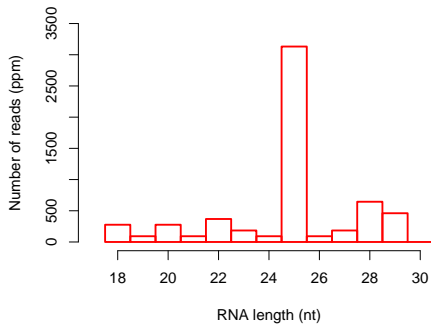

19-mers:



20-mers:

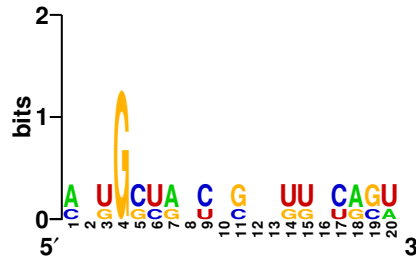

18-mers:

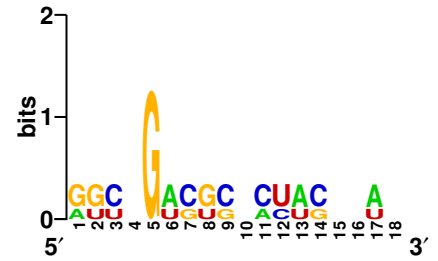

21-mers:

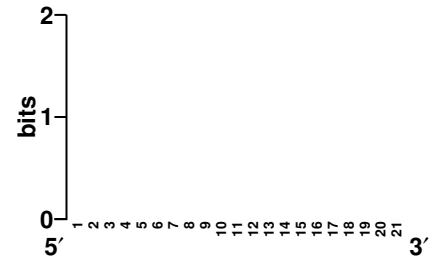

22-mers:

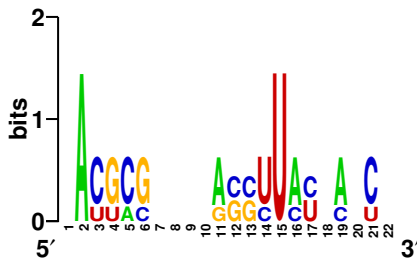

23-mers:

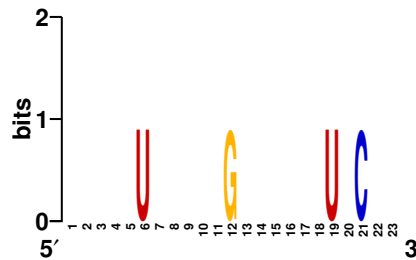

24-mers:

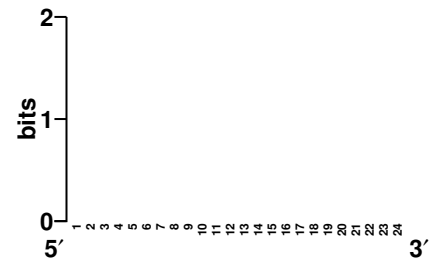

25-mers:

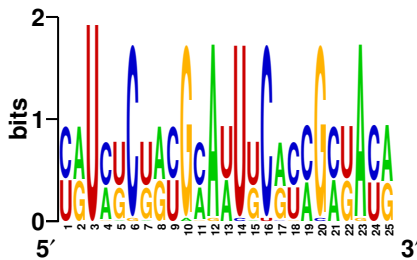

26-mers:

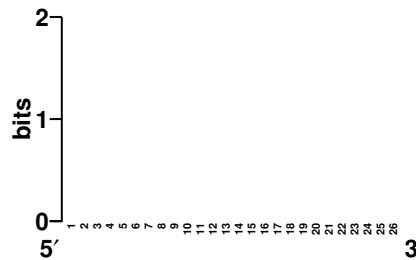

27-mers:

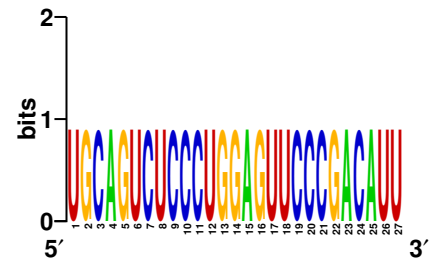

28-mers:

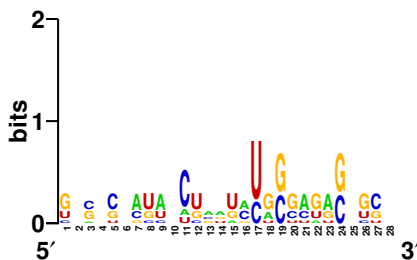

29-mers:

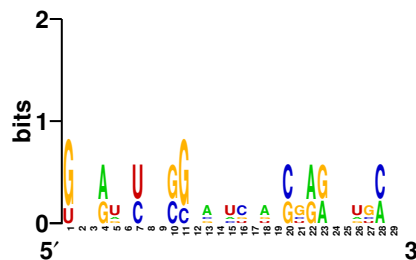

30-mers:

(no read)

Adult male, library 4:

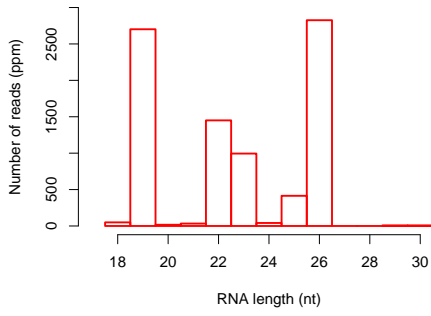

19-mers:

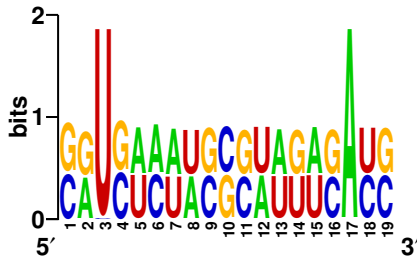

20-mers:

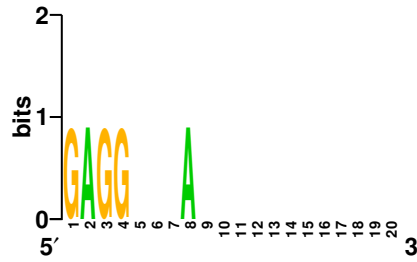

18-mers:

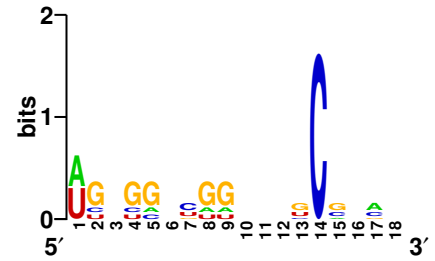

21-mers:

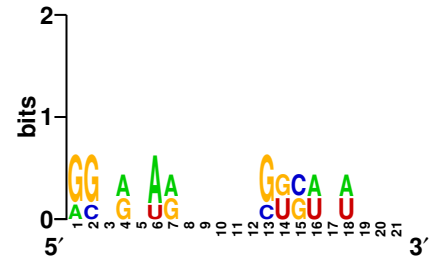

22-mers:

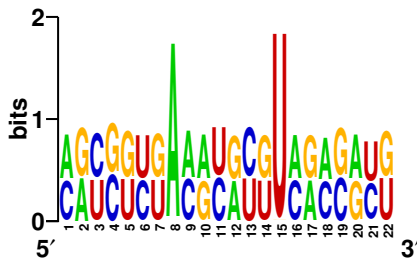

23-mers:

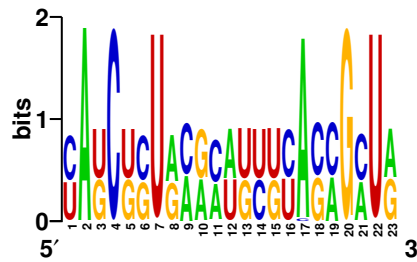

24-mers:

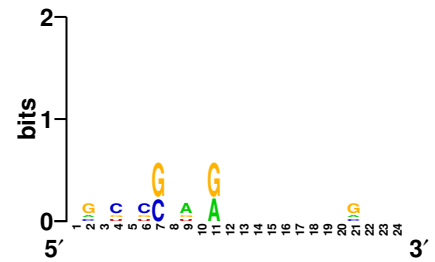

25-mers:

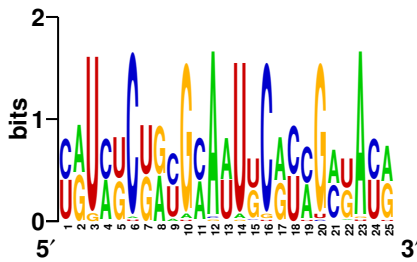

26-mers:

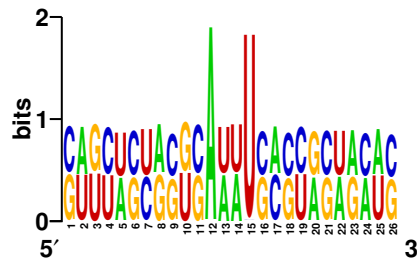

27-mers:

(no read)  
30-mers:



(no read)

29-mers:

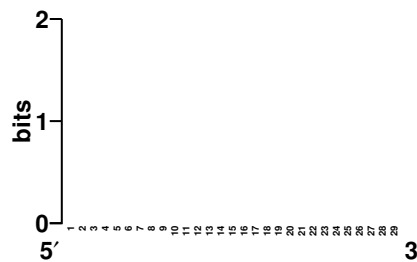



# 9 Extragenomic and extratranscriptomic reads matching the *Vibrio anguillarum* genome

## 9.1 Libraries #1 (total 5' monophosphorylated small RNAs)

Embryo 8h, library 1:

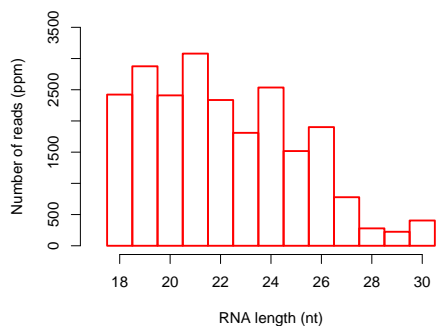

18-mers:

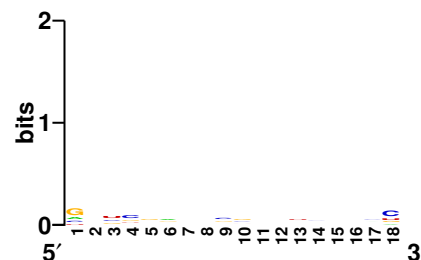

19-mers:

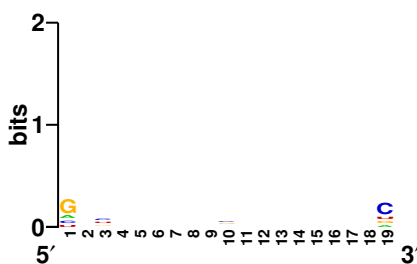

20-mers:

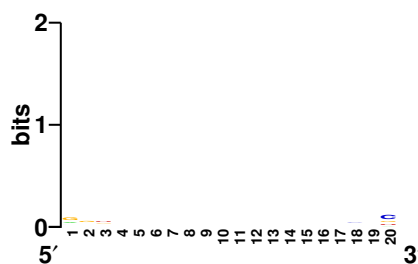

21-mers:

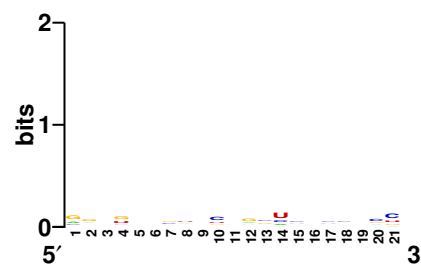

22-mers:

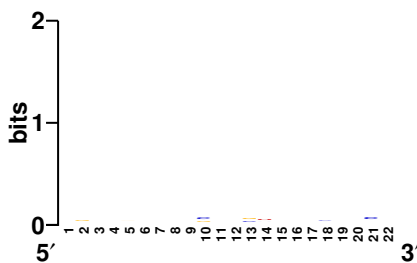

23-mers:

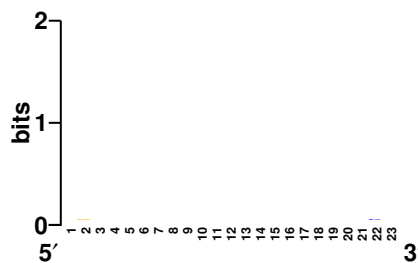

24-mers:

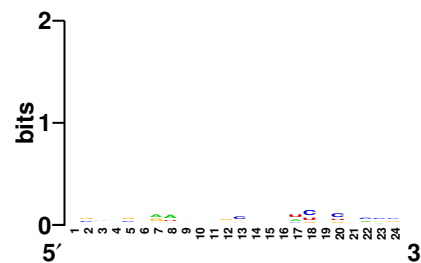

25-mers:

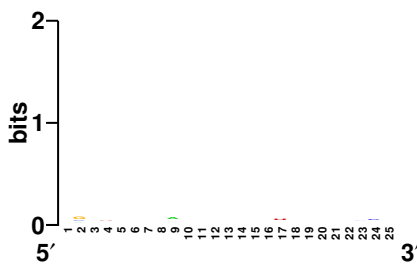

26-mers:

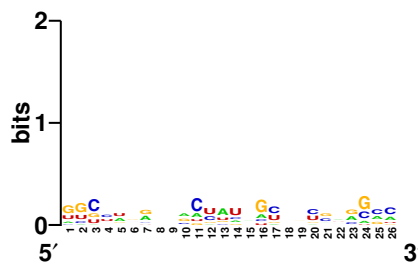

27-mers:

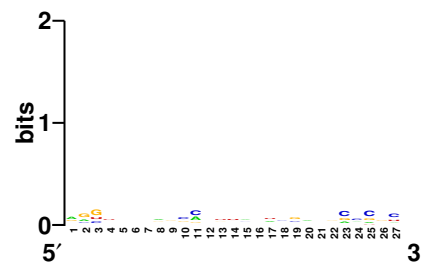

28-mers:

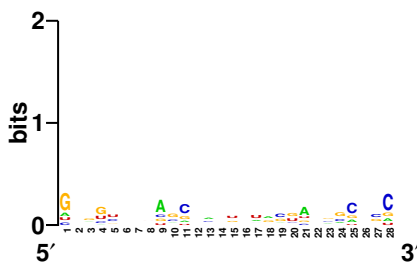

29-mers:

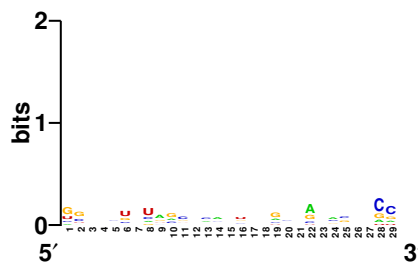

30-mers:

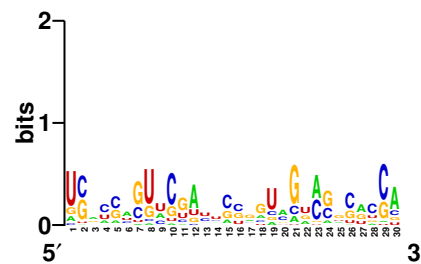

Embryo 15h, library 1:

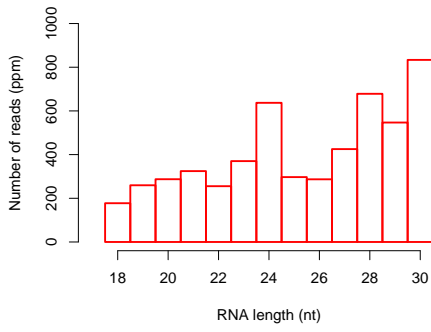

19-mers:

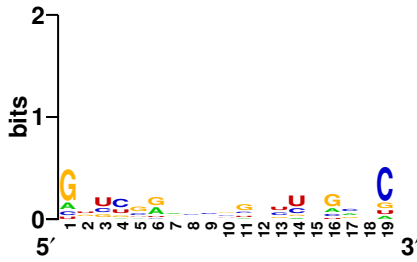

20-mers:

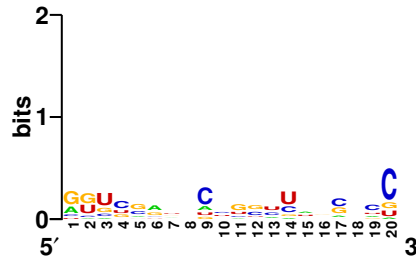

18-mers:

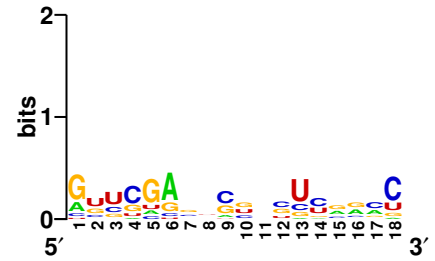

21-mers:

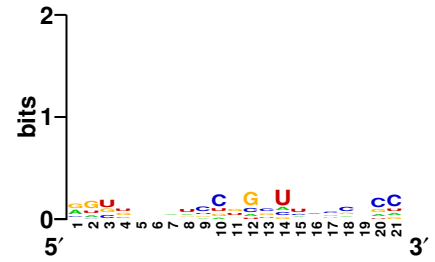

22-mers:

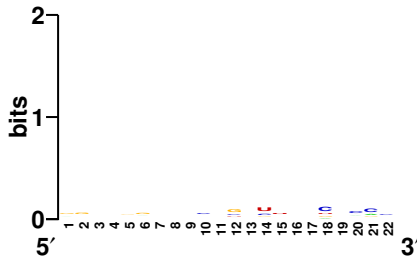

23-mers:

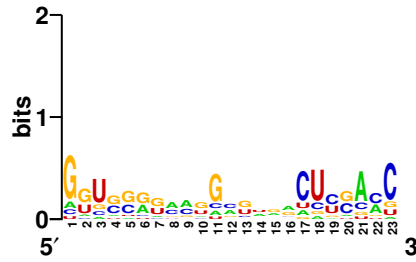

24-mers:

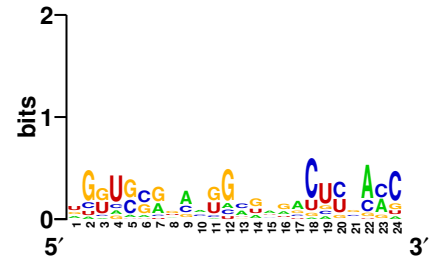

25-mers:

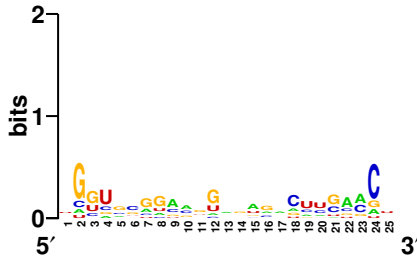

26-mers:

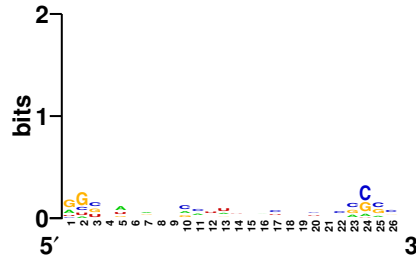

27-mers:

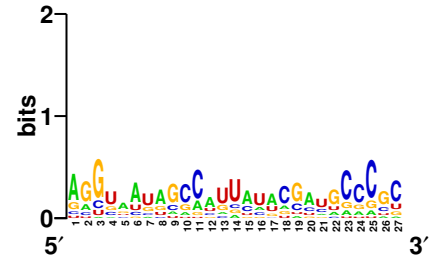

28-mers:

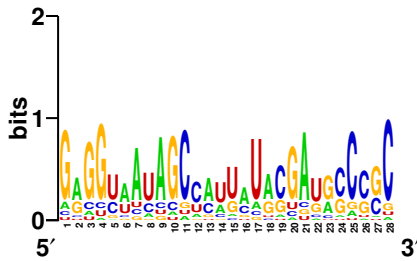

29-mers:

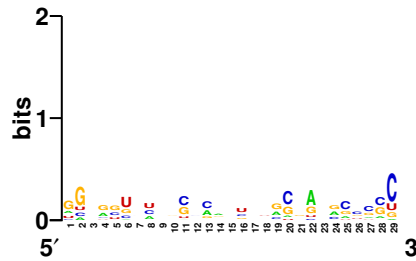

30-mers:

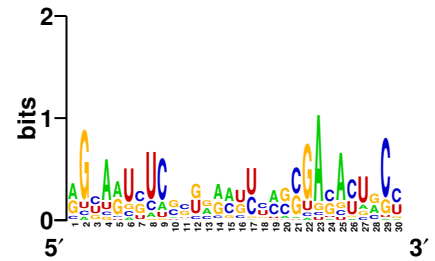

Embryo 36h, library 1:

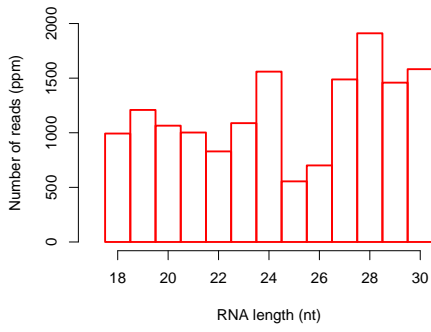

19-mers:

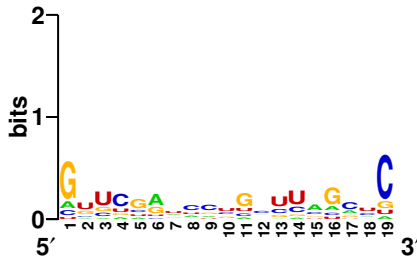

20-mers:

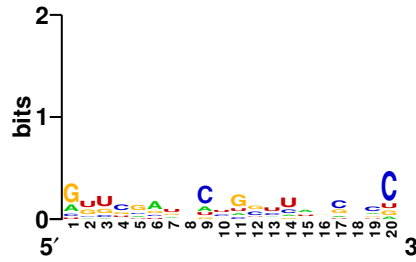

18-mers:

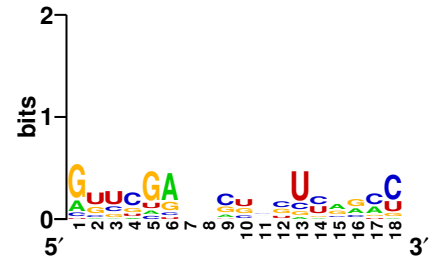

21-mers:

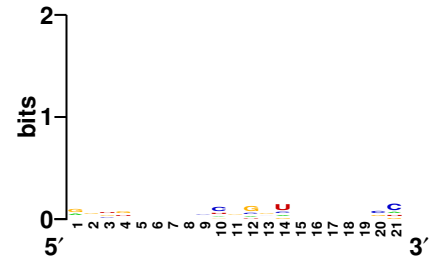

22-mers:

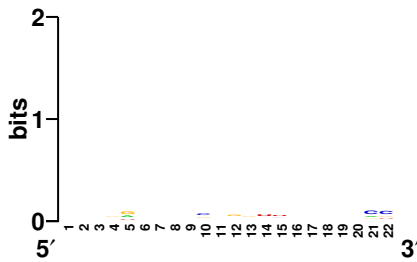

23-mers:

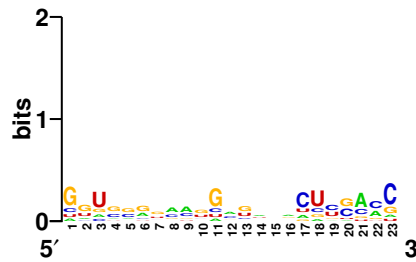

24-mers:

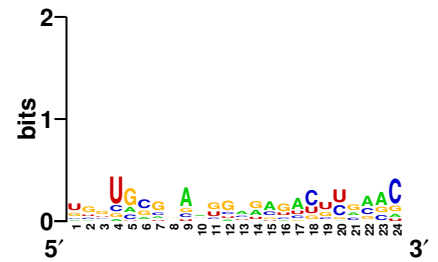

25-mers:

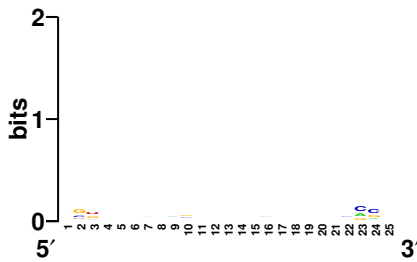

26-mers:

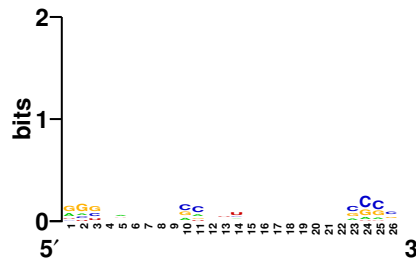

27-mers:

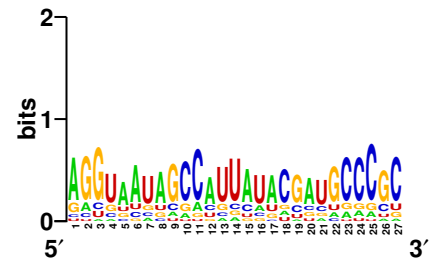

28-mers:

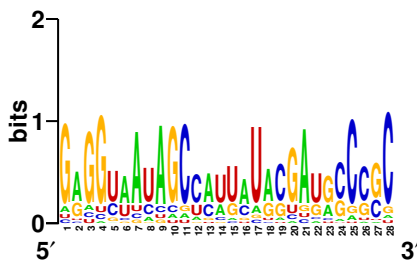

29-mers:

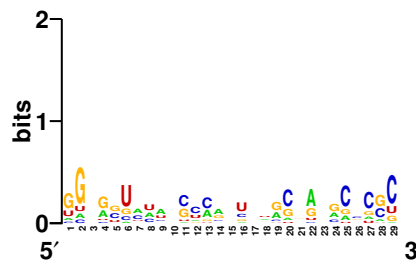

30-mers:

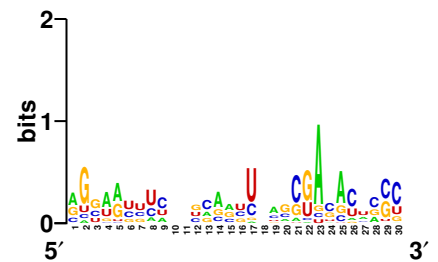

Embryo 60h, library 1:

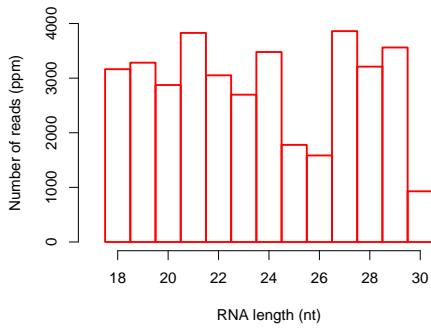

19-mers:

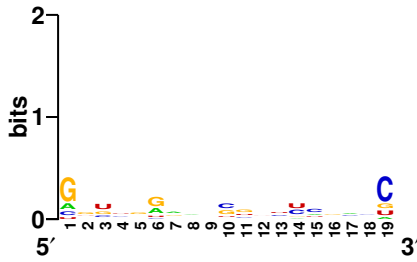

20-mers:

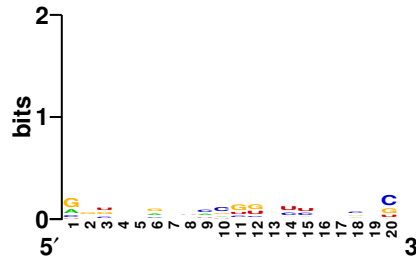

18-mers:

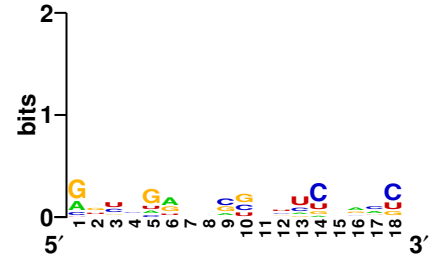

21-mers:

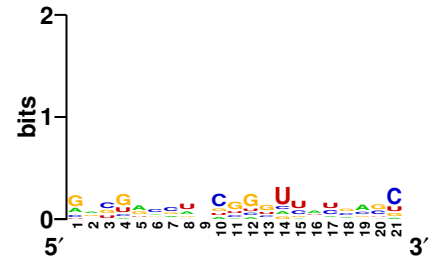

22-mers:

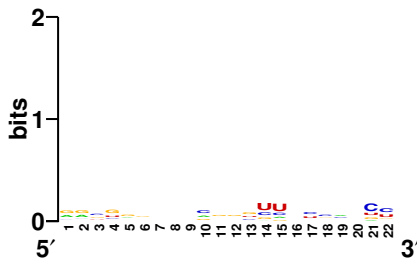

23-mers:

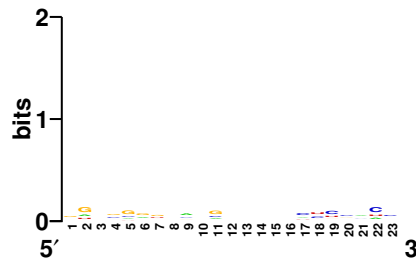

24-mers:

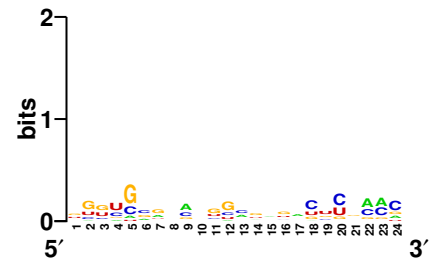

25-mers:

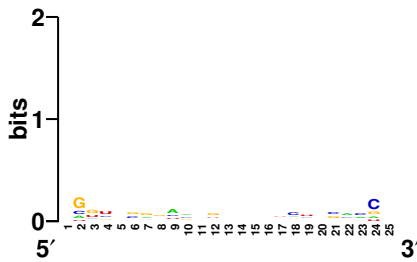

26-mers:

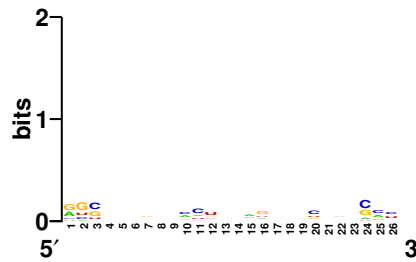

27-mers:

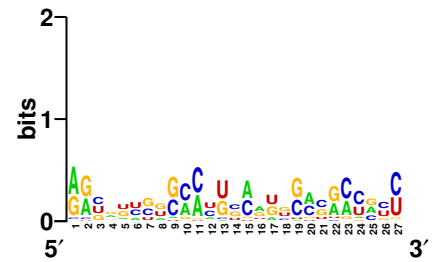

28-mers:

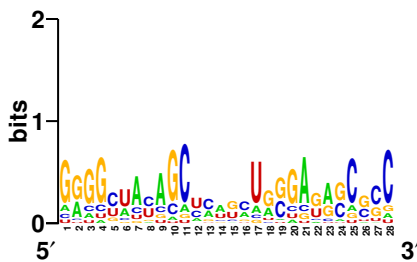

29-mers:

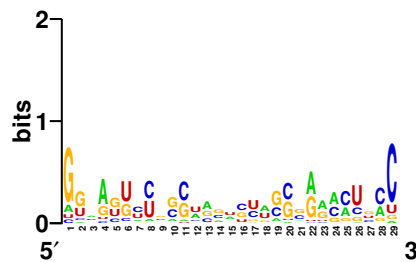

30-mers:

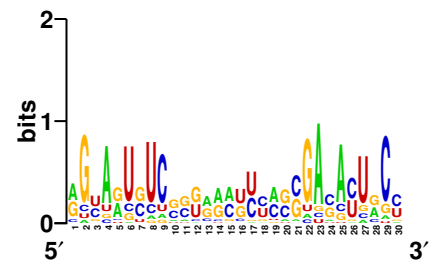

Adult female, library 1:

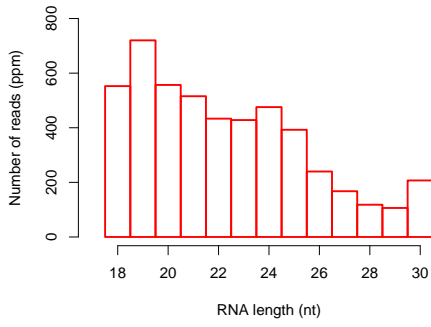

19-mers:

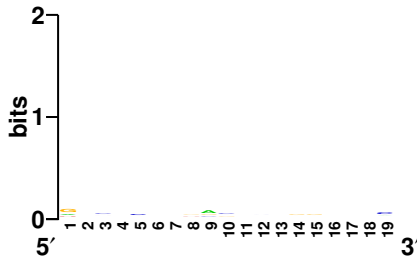

20-mers:

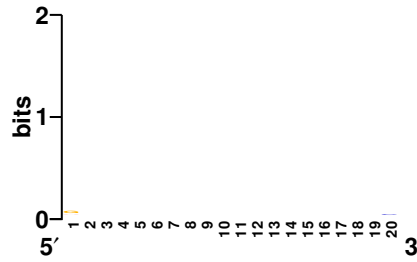

18-mers:

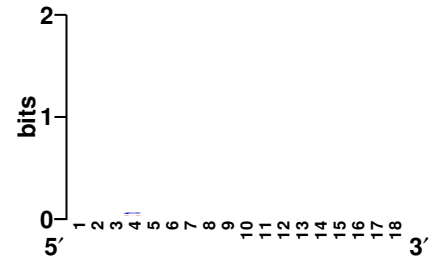

21-mers:

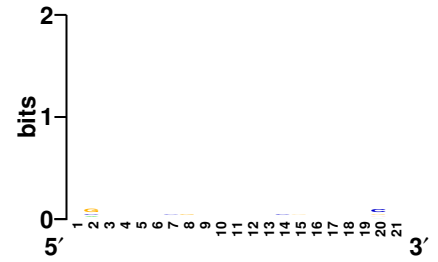

22-mers:

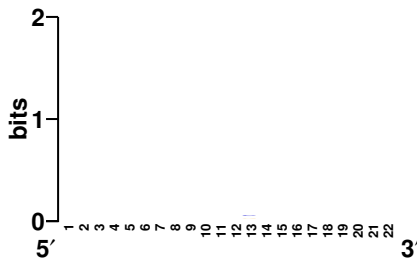

23-mers:

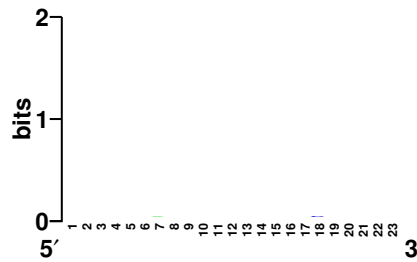

24-mers:

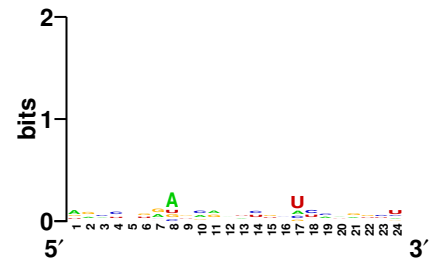

25-mers:

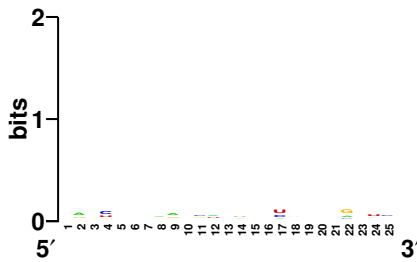

26-mers:

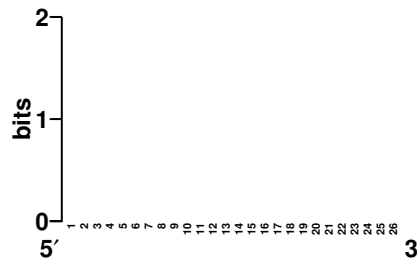

27-mers:

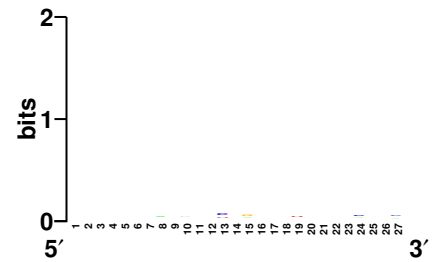

28-mers:

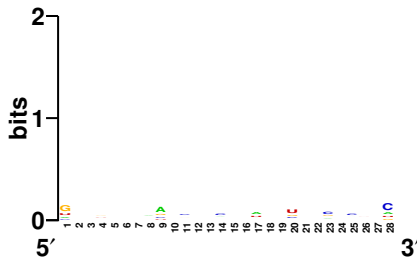

29-mers:

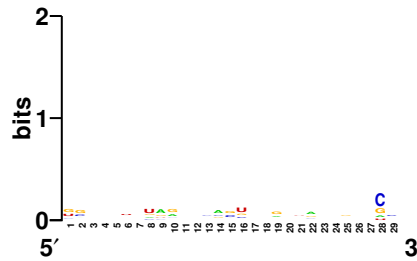

30-mers:

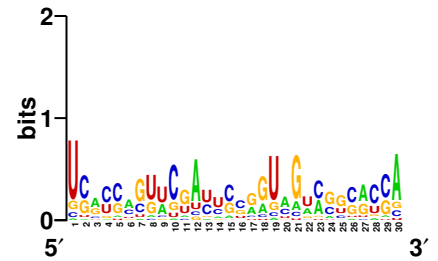

Adult male, library 1:

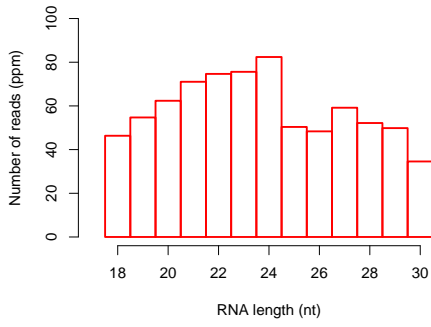

19-mers:

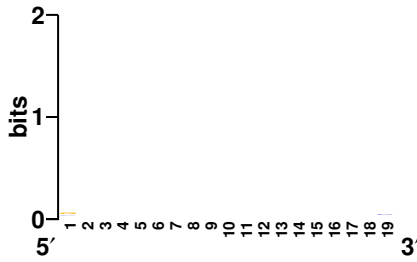

20-mers:

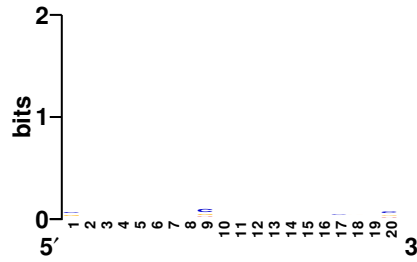

18-mers:

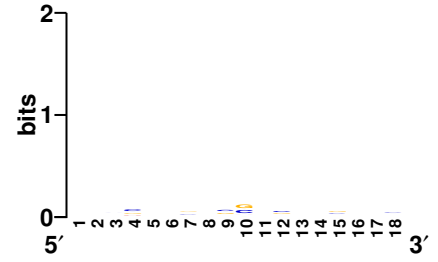

21-mers:

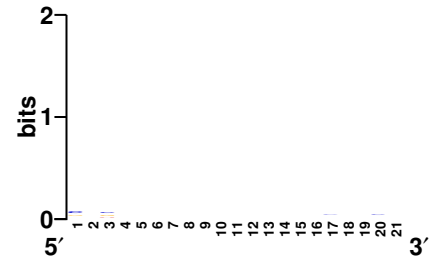

22-mers:

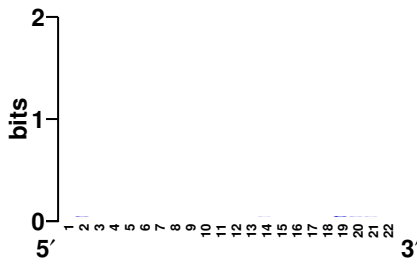

23-mers:

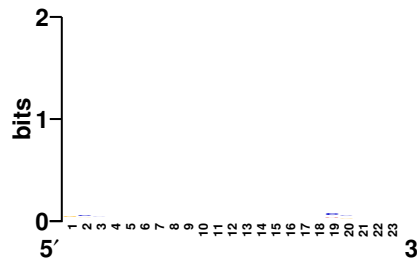

24-mers:

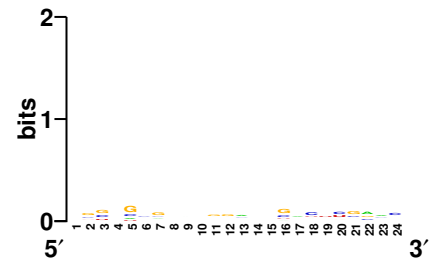

25-mers:

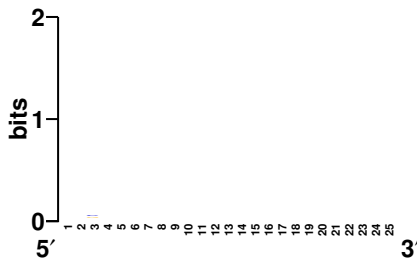

26-mers:

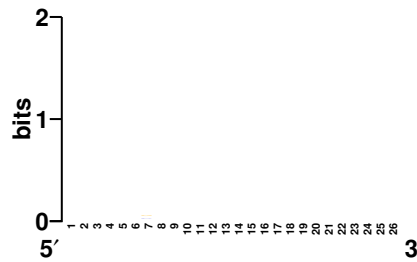

27-mers:

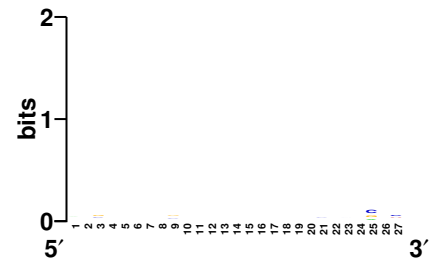

28-mers:

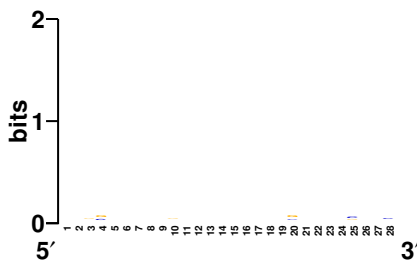

29-mers:

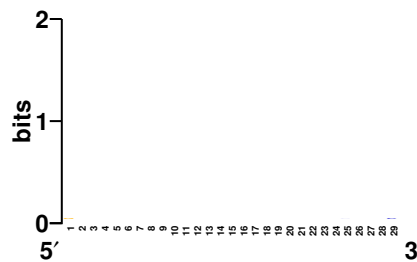

30-mers:

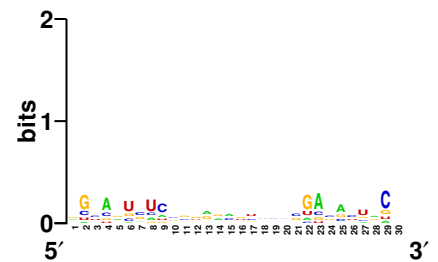

## 9.2 Libraries #2 (3' modified, 5' monophosphorylated small RNAs)

Embryo 8h, library 2:

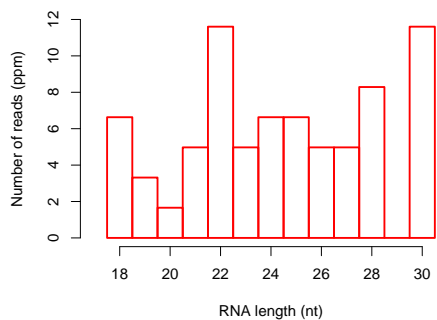

18-mers:

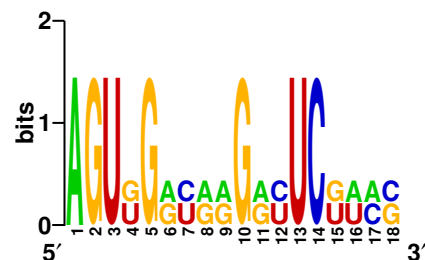

19-mers:

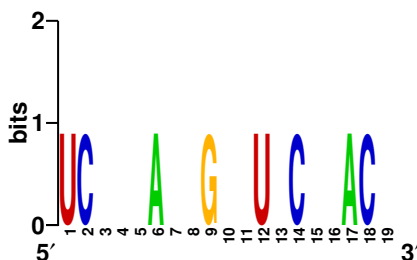

20-mers:

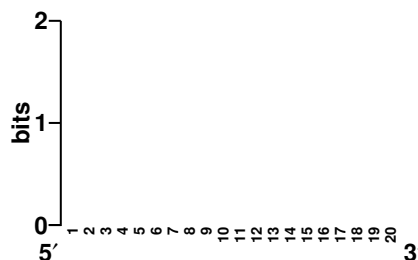

21-mers:

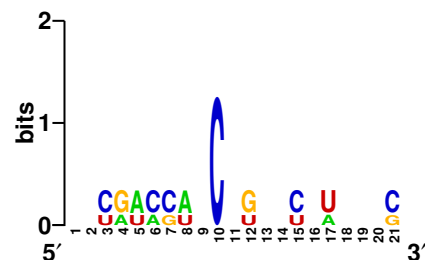

22-mers:

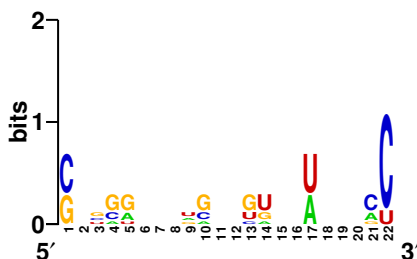

23-mers:

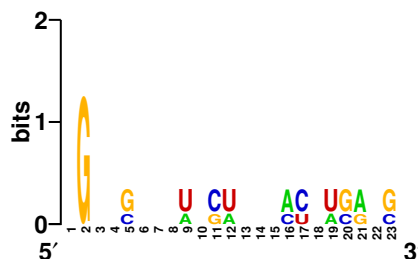

24-mers:

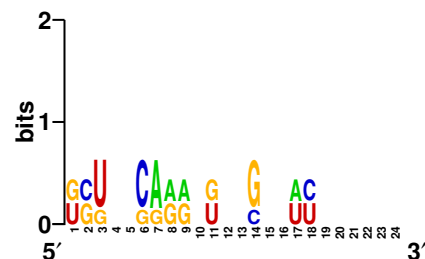

25-mers:

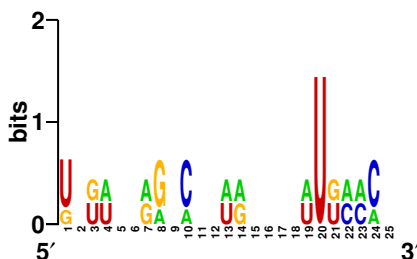

26-mers:

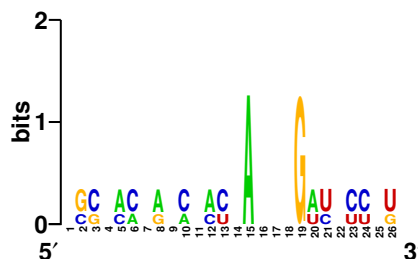

27-mers:

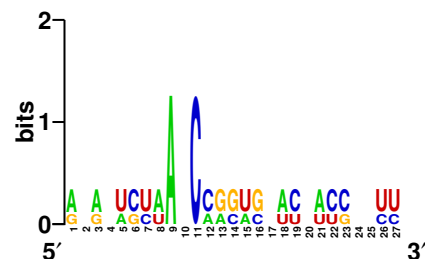

28-mers:

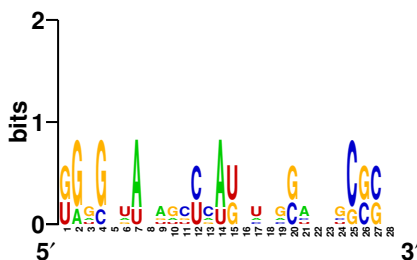

29-mers:

(no read)

30-mers:

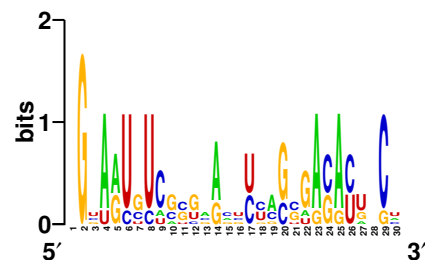

Embryo 15h, library 2:

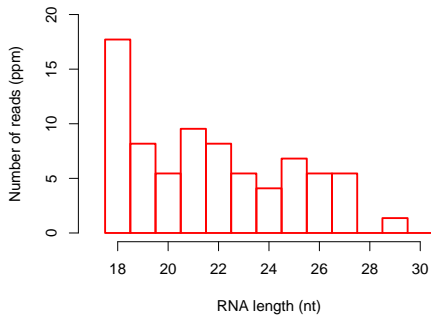

19-mers:

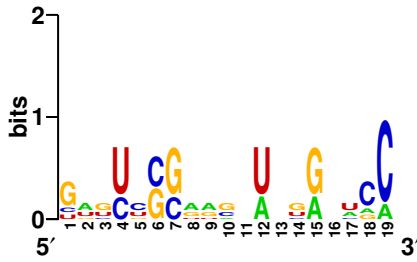

20-mers:

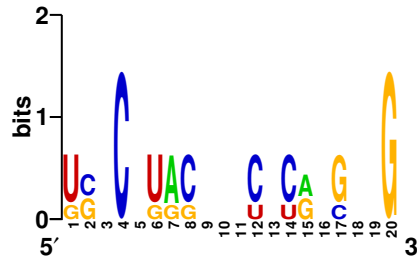

18-mers:

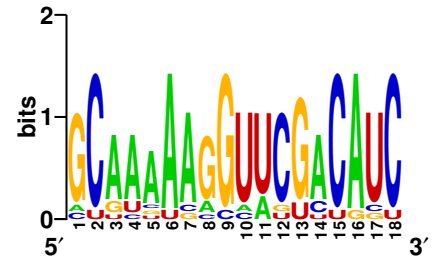

21-mers:

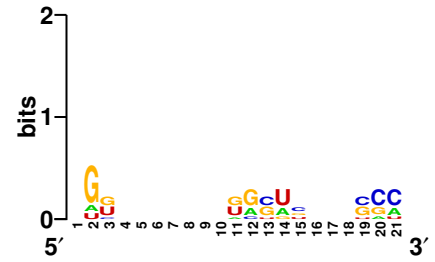

22-mers:

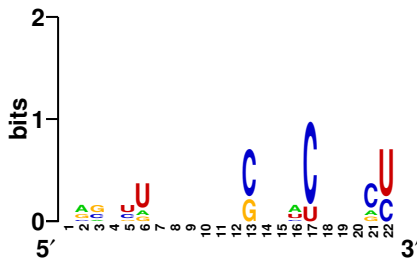

23-mers:

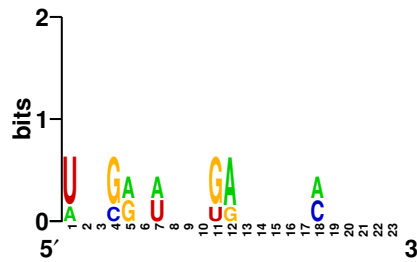

24-mers:

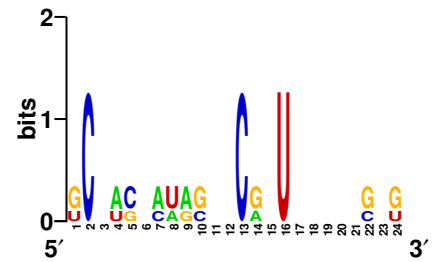

25-mers:

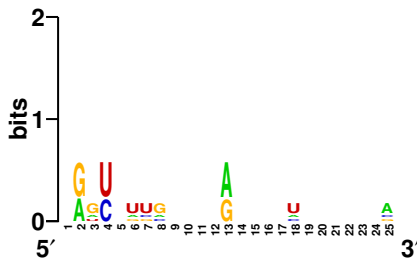

26-mers:

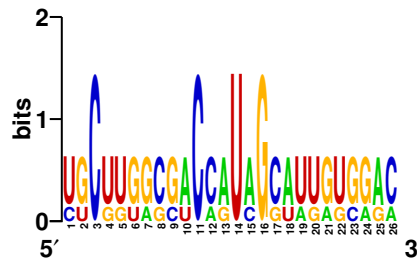

27-mers:

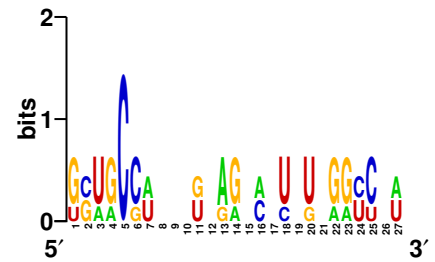

28-mers:

(no read)

29-mers:



30-mers:

(no read)





Embryo 60h, library 2:

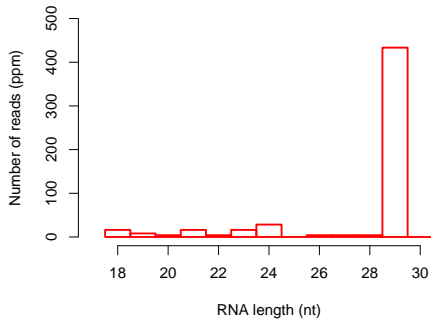

19-mers:



20-mers:

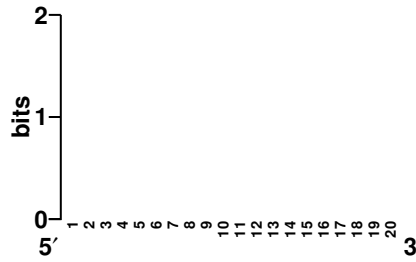

18-mers:

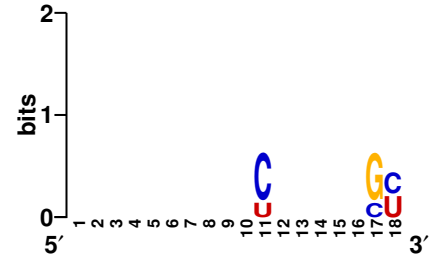

21-mers:



22-mers:



23-mers:

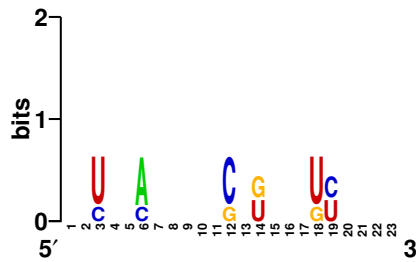

24-mers:

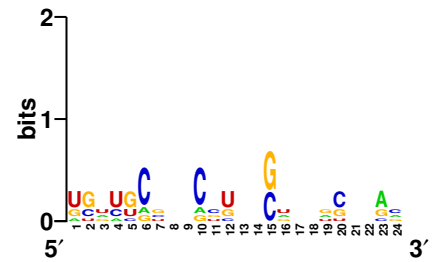

25-mers:

26-mers:

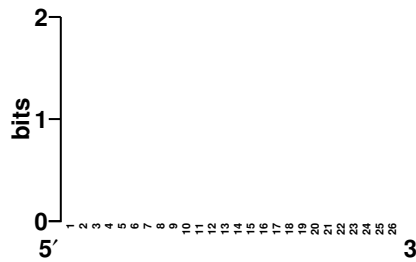

27-mers:

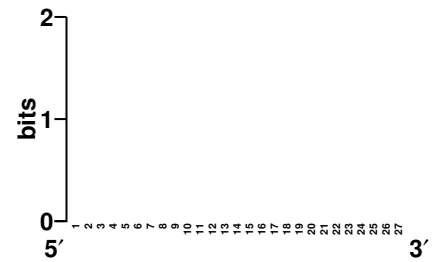

(no read)

28-mers:



29-mers:

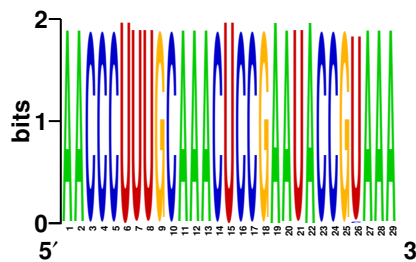

30-mers:

(no read)

Adult female, library 2:



19-mers:



22-mers:

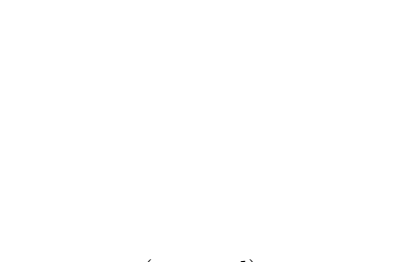

(no read)  
25-mers:  
(no read)  
28-mers:

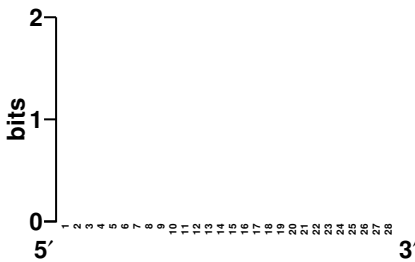

20-mers:

(no read)  
23-mers:

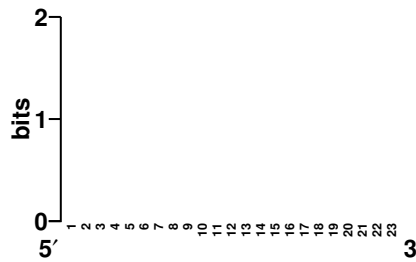

26-mers:  
(no read)  
29-mers:

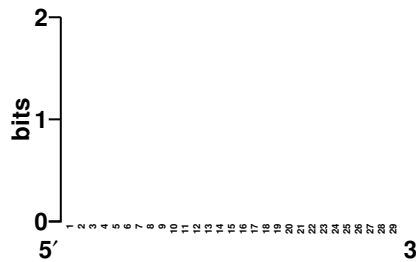

18-mers:

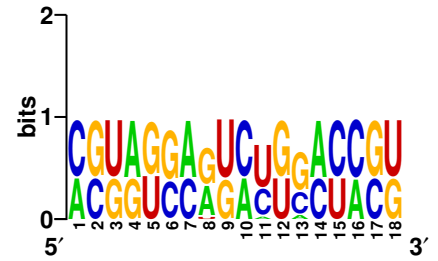

21-mers:

(no read)  
24-mers:

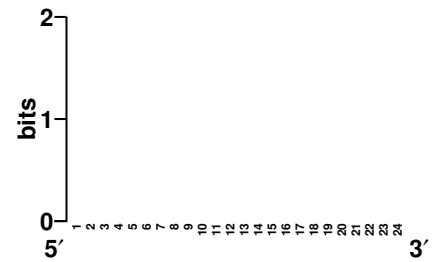

27-mers:  
(no read)  
30-mers:

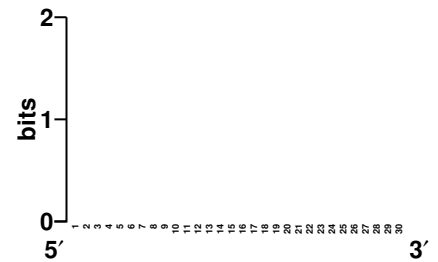

Adult male, library 2:

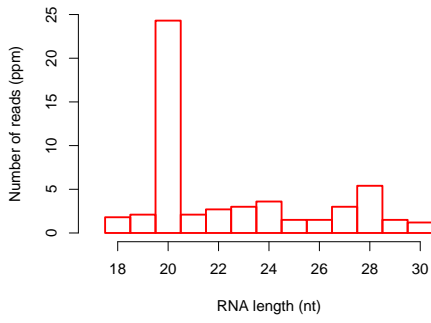

19-mers:

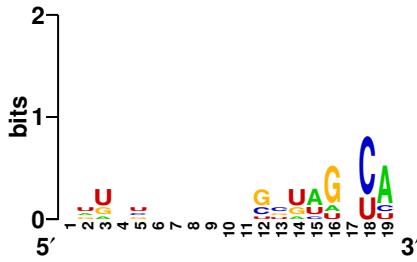

20-mers:

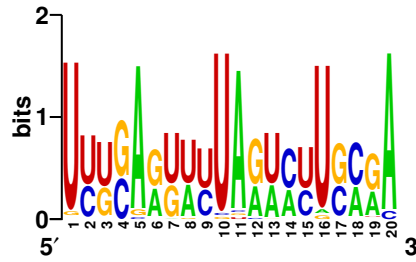

18-mers:

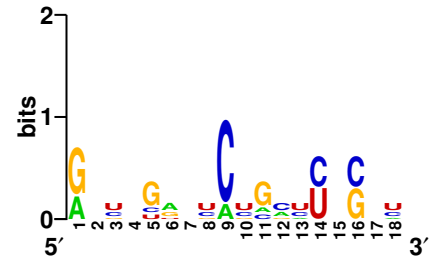

21-mers:

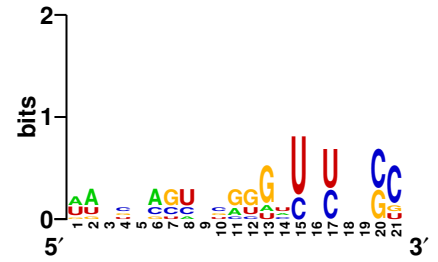

22-mers:

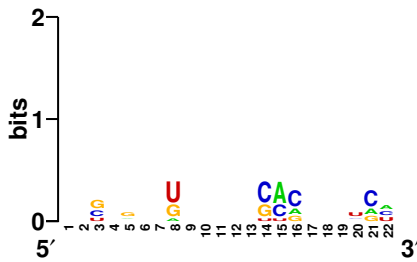

23-mers:

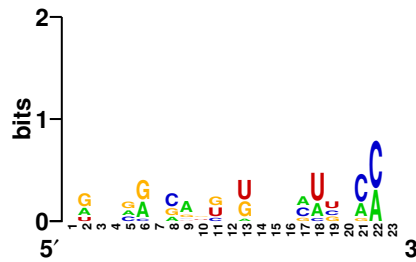

24-mers:

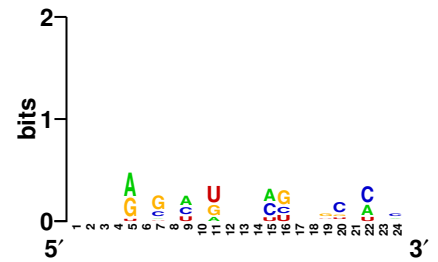

25-mers:

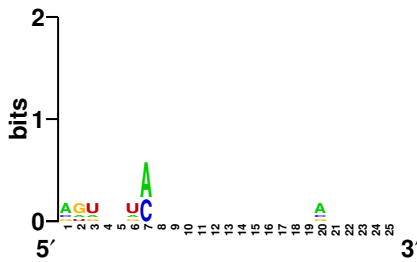

26-mers:

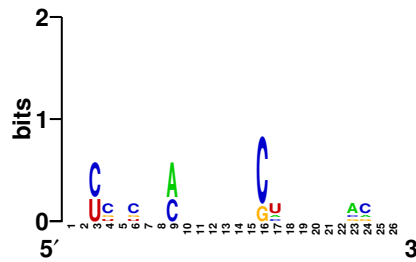

27-mers:

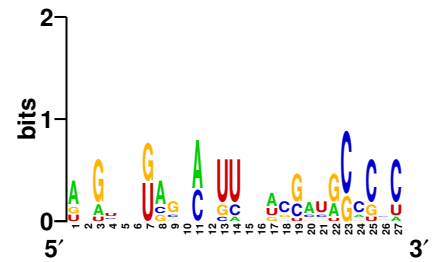

28-mers:

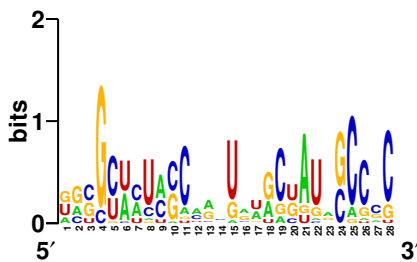

29-mers:

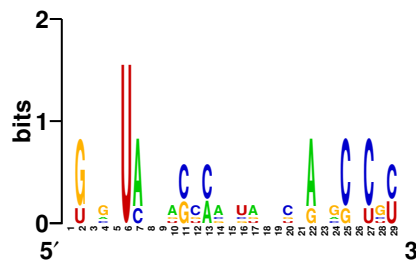

30-mers:

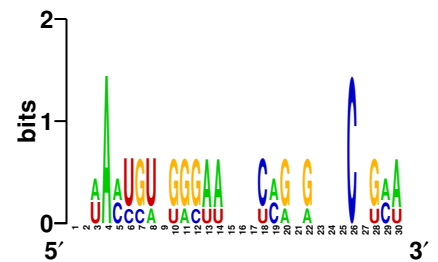

### 9.3 Libraries #3 (total 5' hydroxyl or polyphosphorylated small RNAs)

Embryo 8h, library 3:

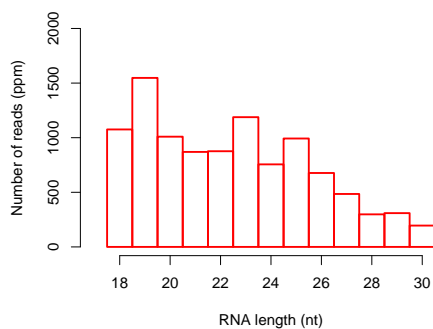

18-mers:

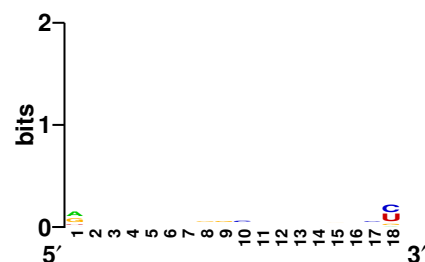

19-mers:

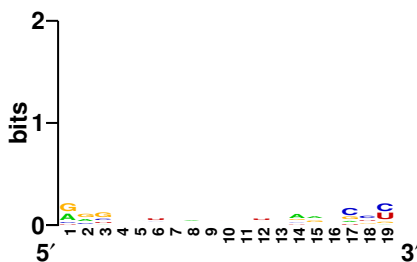

20-mers:

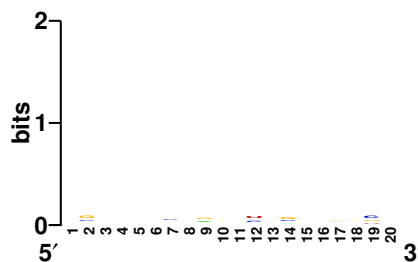

21-mers:

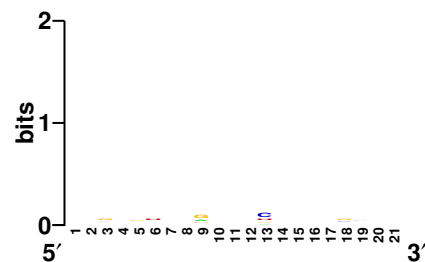

22-mers:

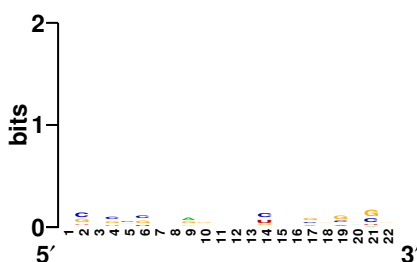

23-mers:

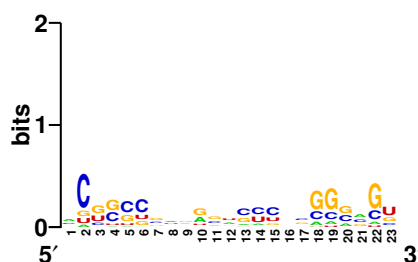

24-mers:

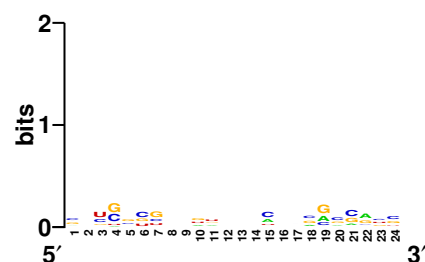

25-mers:

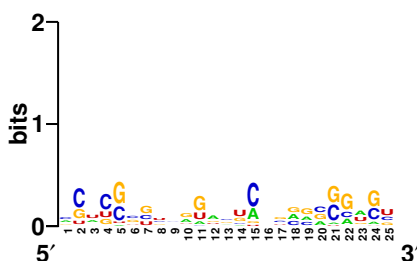

26-mers:

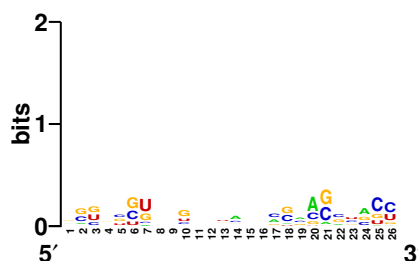

27-mers:

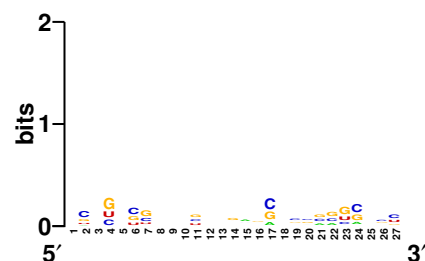

28-mers:

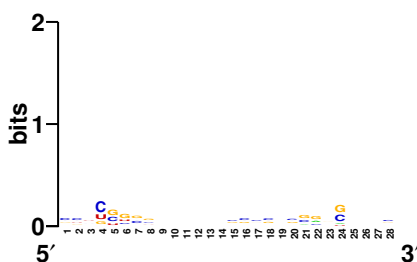

29-mers:

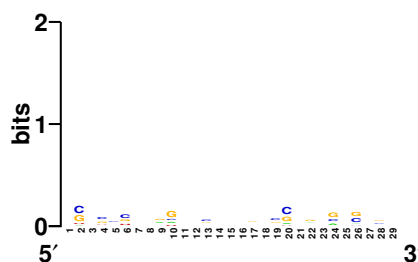

30-mers:

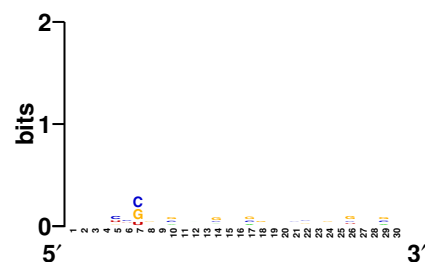

Embryo 15h, library 3:

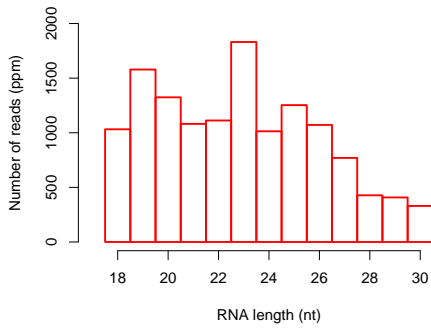

19-mers:

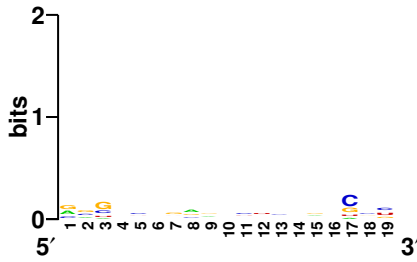

20-mers:

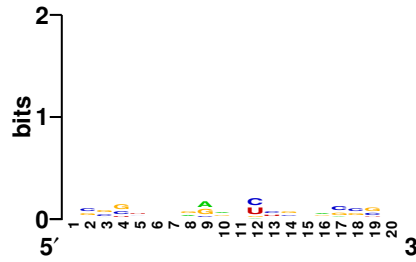

18-mers:

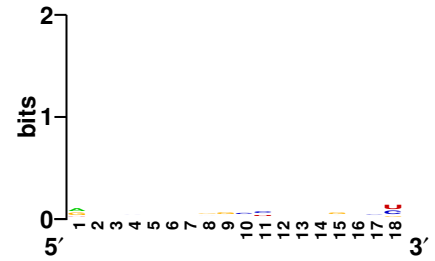

21-mers:

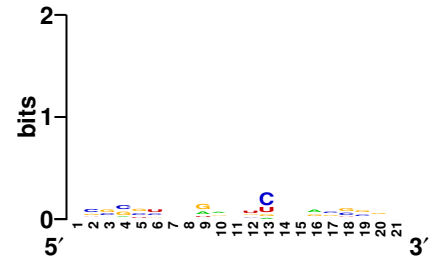

22-mers:

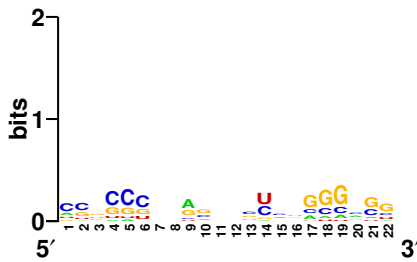

23-mers:

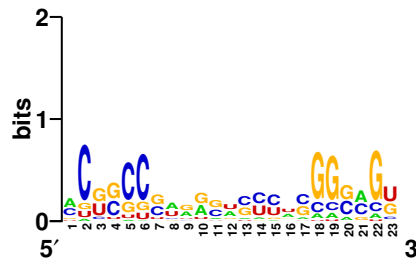

24-mers:

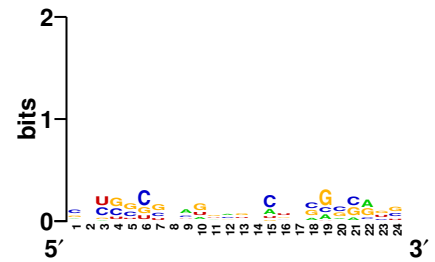

25-mers:

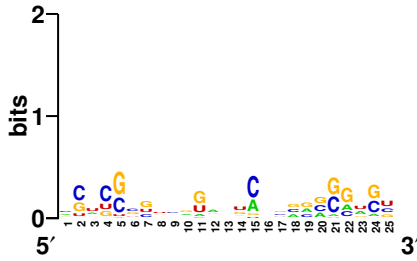

26-mers:

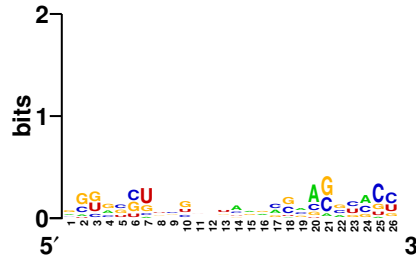

27-mers:

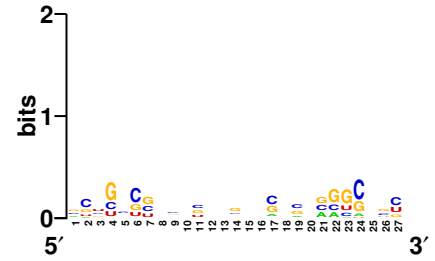

28-mers:

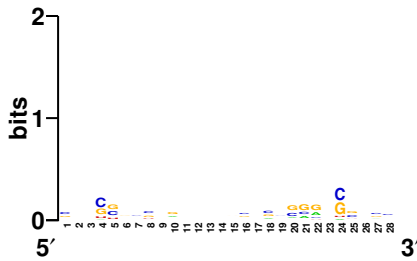

29-mers:

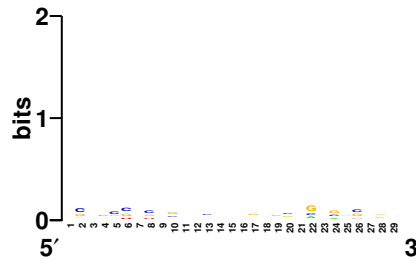

30-mers:

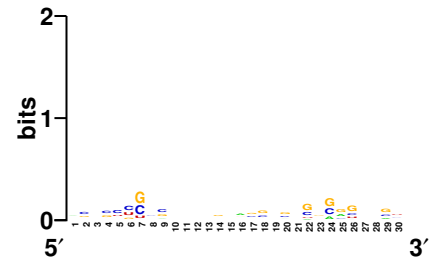

Embryo 36h, library 3:

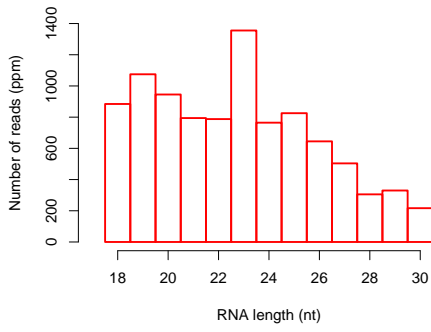

19-mers:

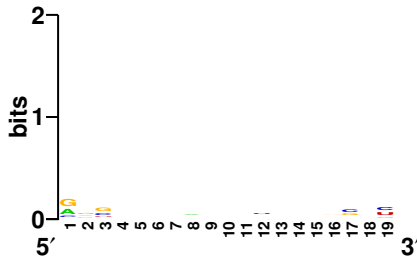

20-mers:

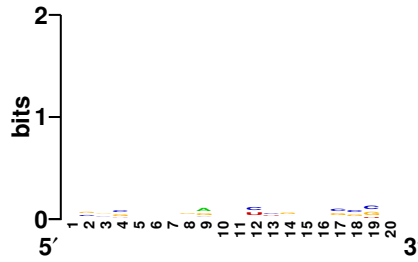

18-mers:

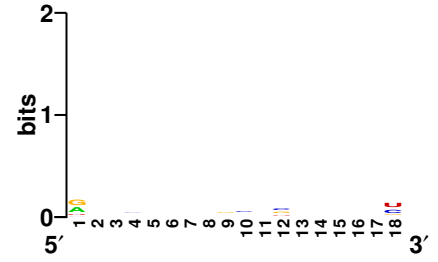

21-mers:

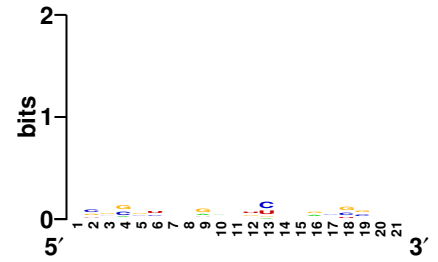

22-mers:

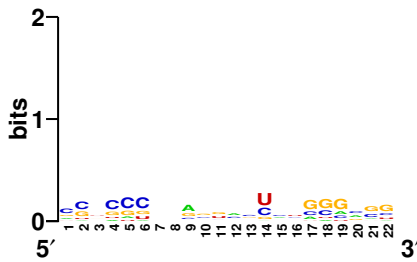

23-mers:

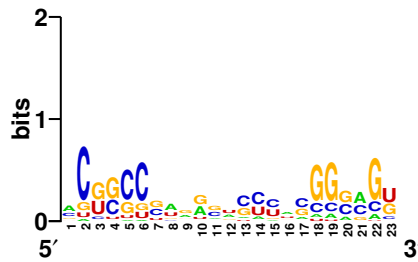

24-mers:

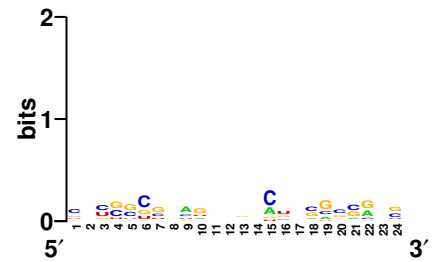

25-mers:

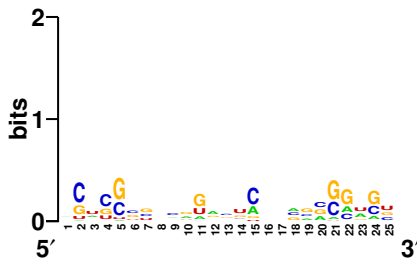

26-mers:

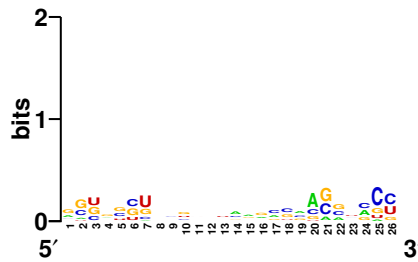

27-mers:

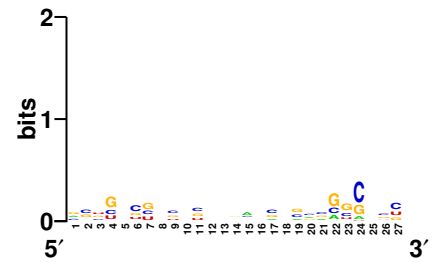

28-mers:

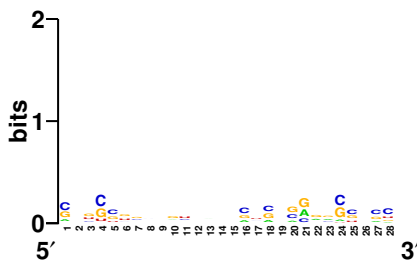

29-mers:

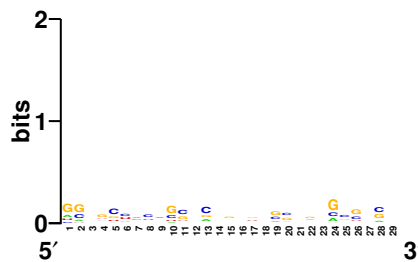

30-mers:

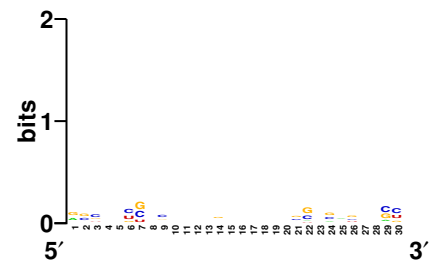

Embryo 60h, library 3:

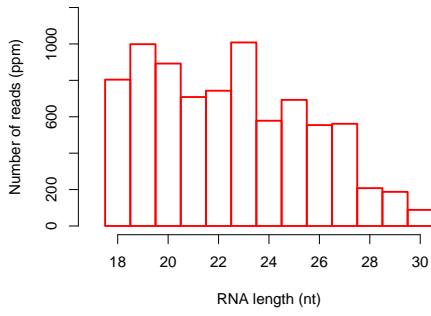

19-mers:

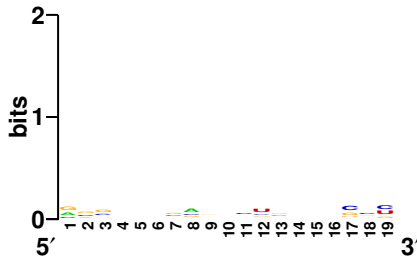

20-mers:

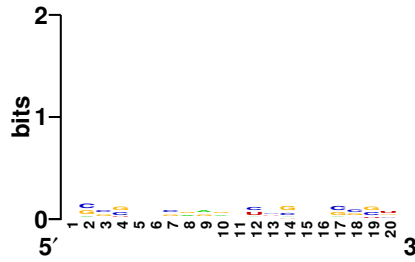

18-mers:

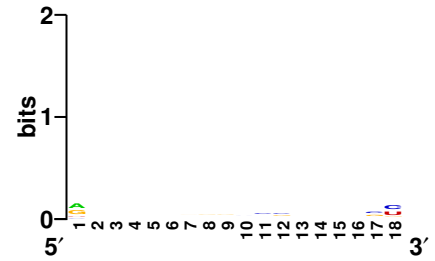

21-mers:

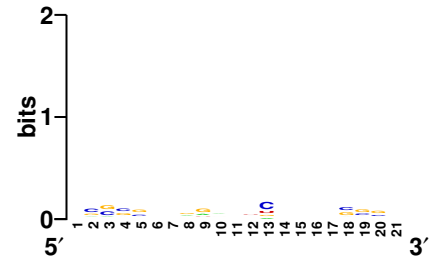

22-mers:

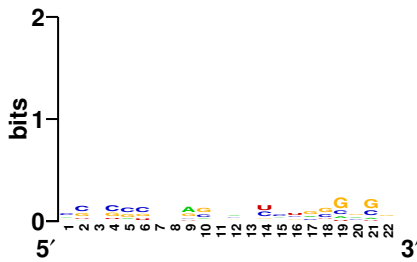

23-mers:

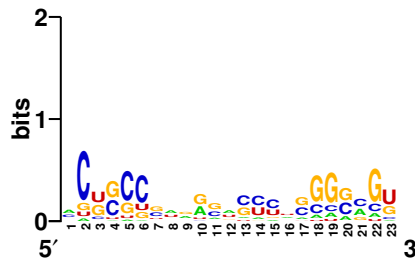

24-mers:

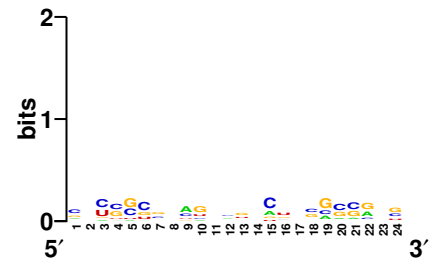

25-mers:

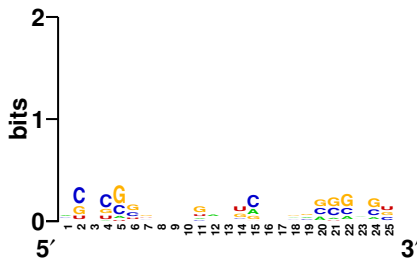

26-mers:

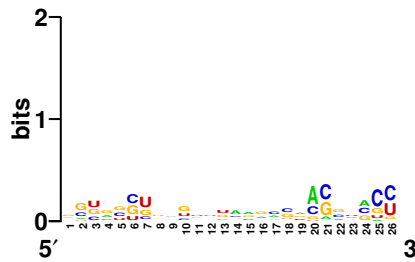

27-mers:

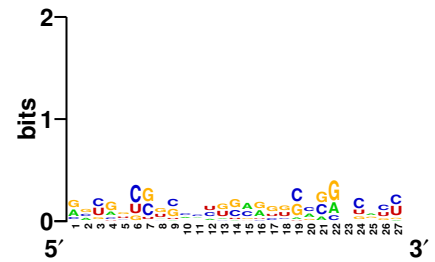

28-mers:

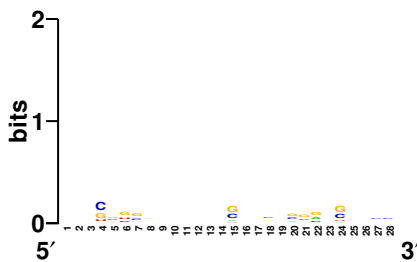

29-mers:

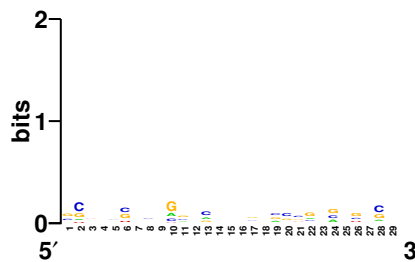

30-mers:

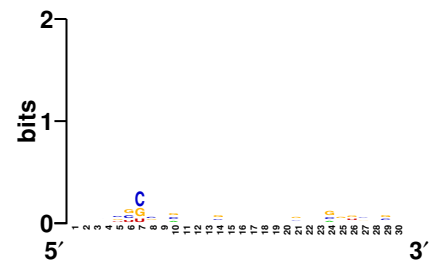



Adult female, library 3:

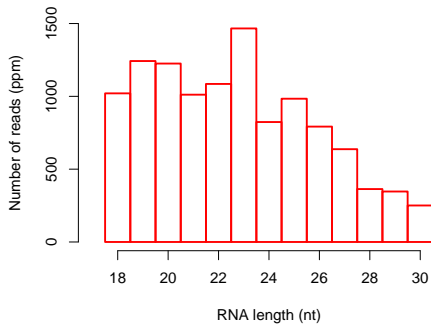

19-mers:

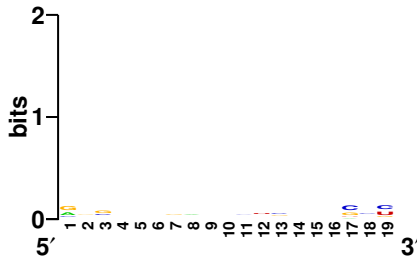

20-mers:

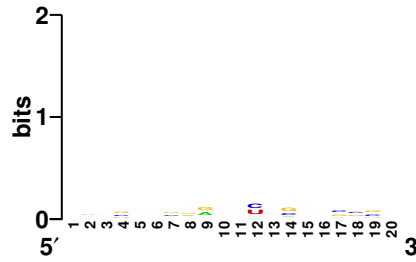

18-mers:

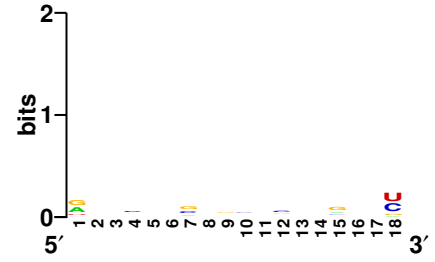

21-mers:

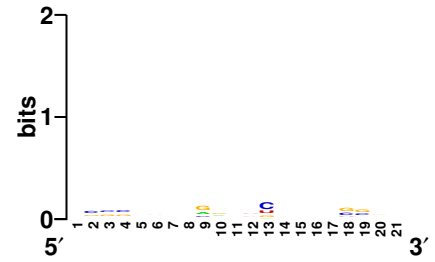

22-mers:

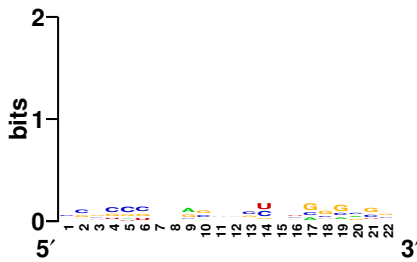

23-mers:

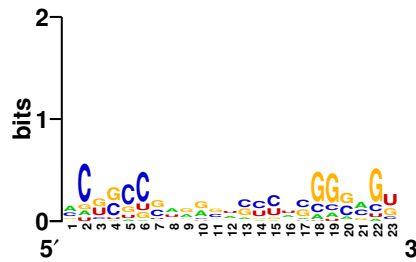

24-mers:

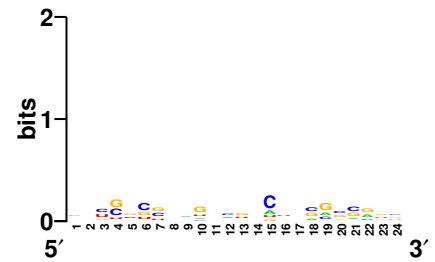

25-mers:

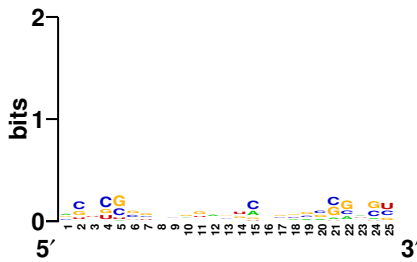

26-mers:

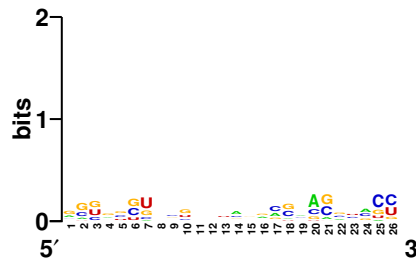

27-mers:

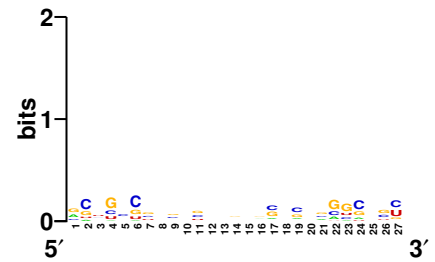

28-mers:

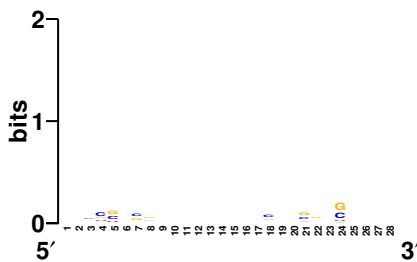

29-mers:

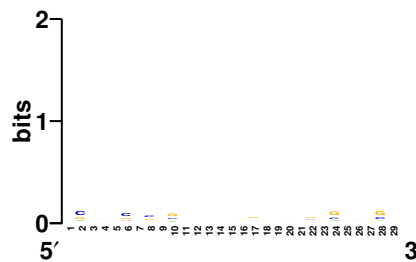

30-mers:

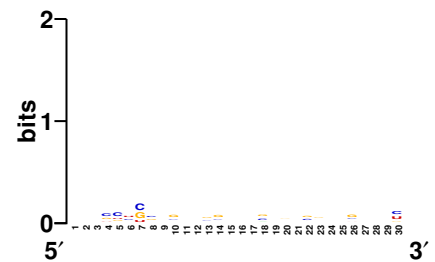

Adult male, library 3:

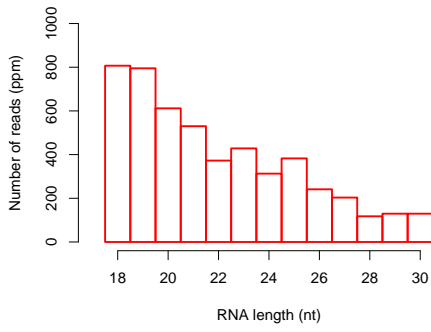

19-mers:

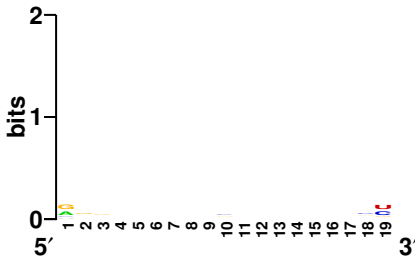

20-mers:

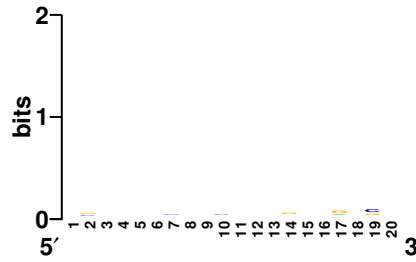

18-mers:

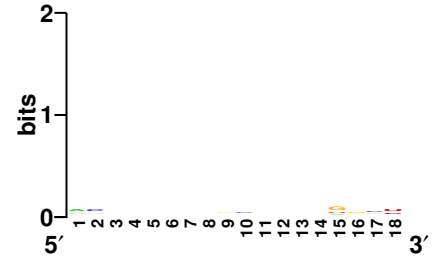

21-mers:

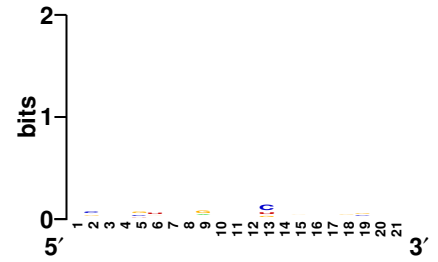

22-mers:

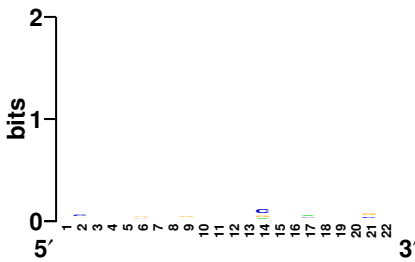

23-mers:

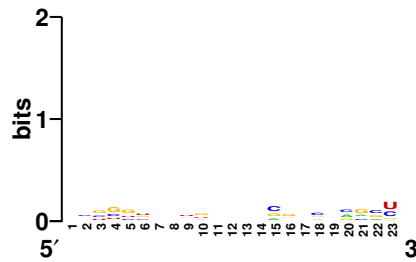

24-mers:

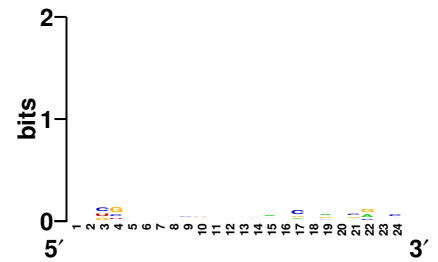

25-mers:

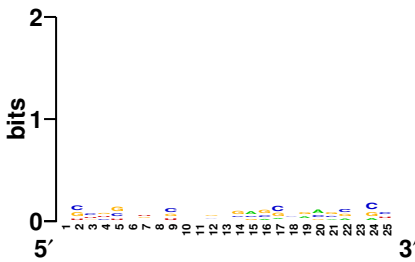

26-mers:

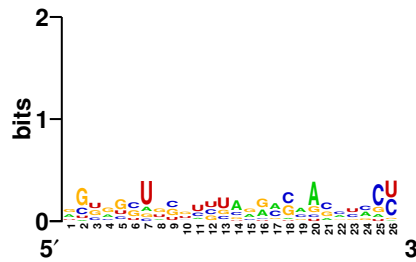

27-mers:

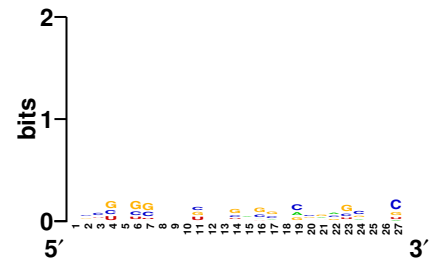

28-mers:

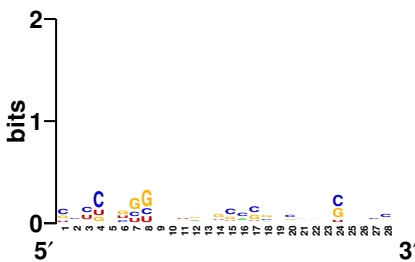

29-mers:

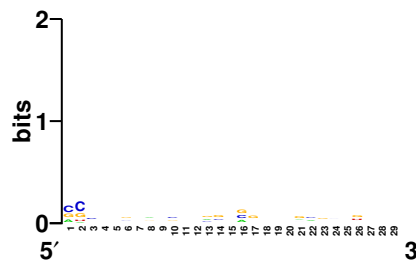

30-mers:

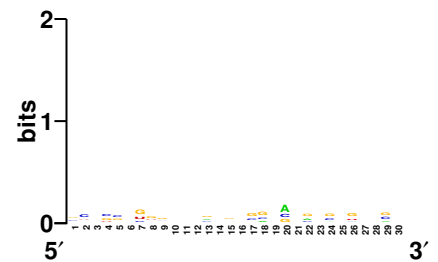

## 9.4 Libraries #4 (3' modified, 5' hydroxyl or polyphosphorylated small RNAs)

Embryo 8h, library 4:

18-mers:

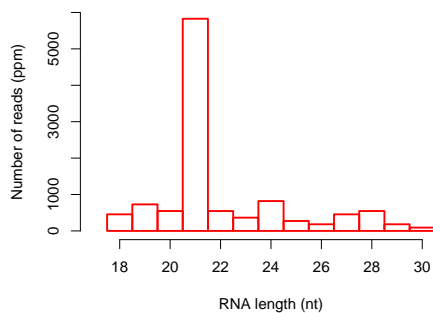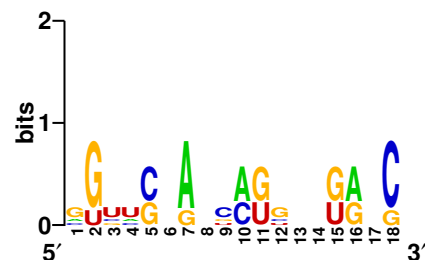

19-mers:

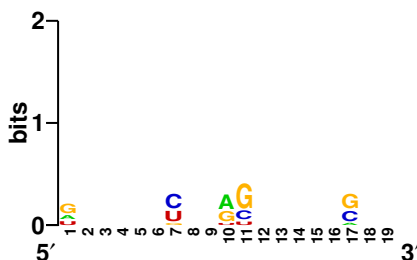

20-mers:

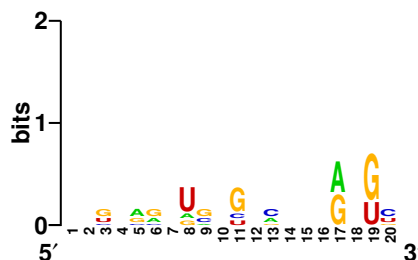

21-mers:

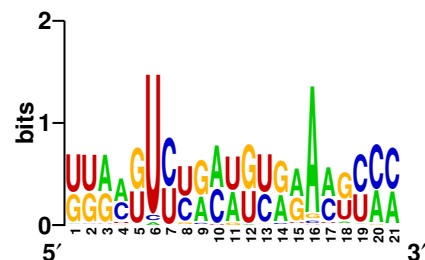

22-mers:

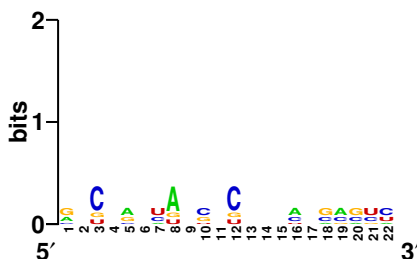

23-mers:

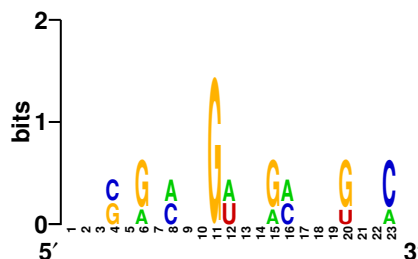

24-mers:

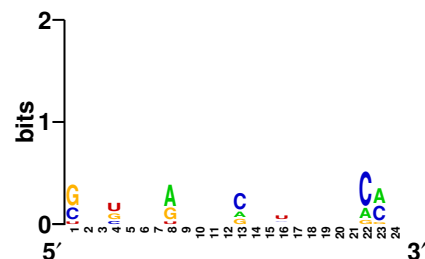

25-mers:

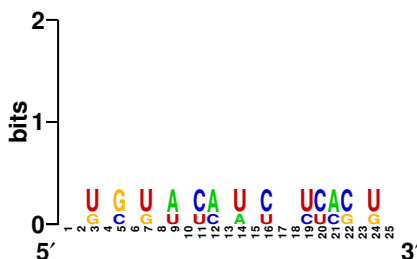

26-mers:

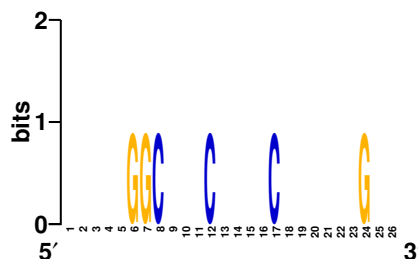

27-mers:

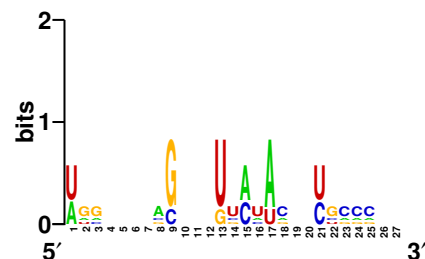

28-mers:

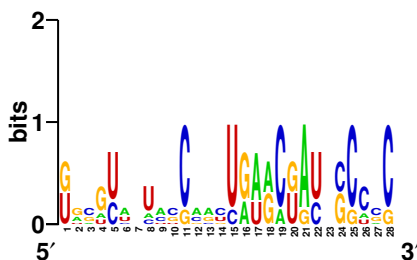

29-mers:

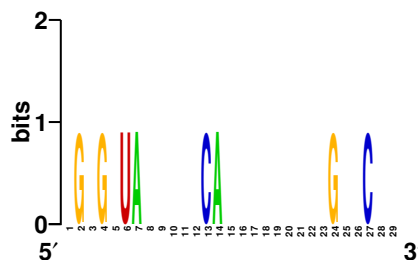

30-mers:

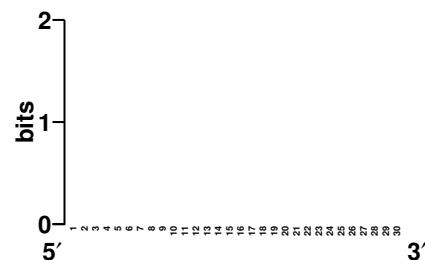

Embryo 15h, library 4:

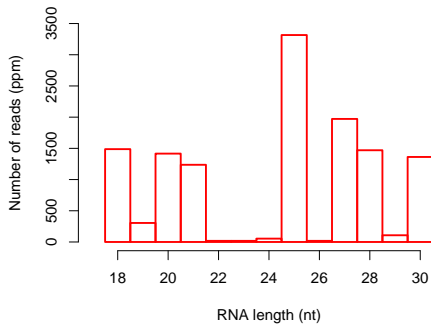

19-mers:

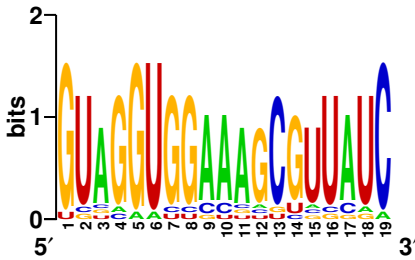

20-mers:

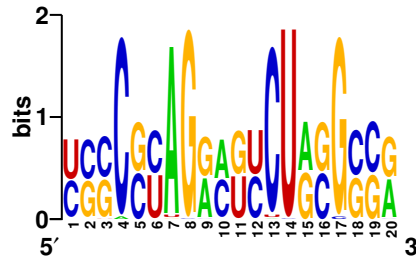

18-mers:

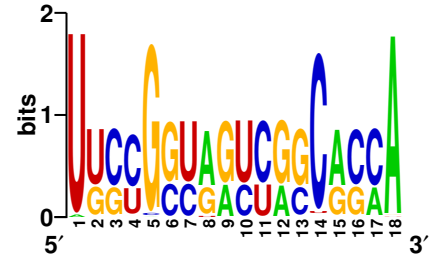

21-mers:

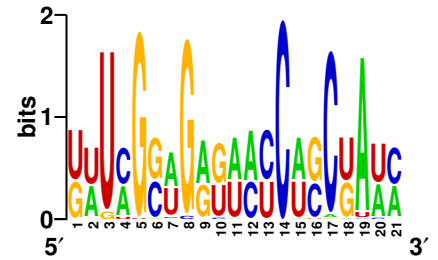

22-mers:

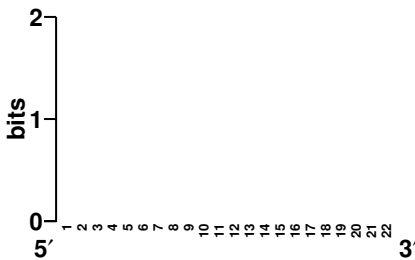

23-mers:

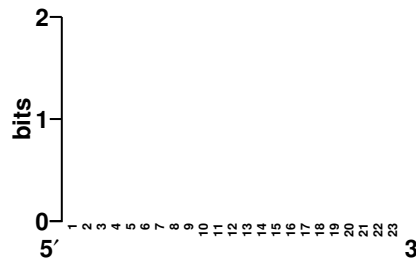

24-mers:

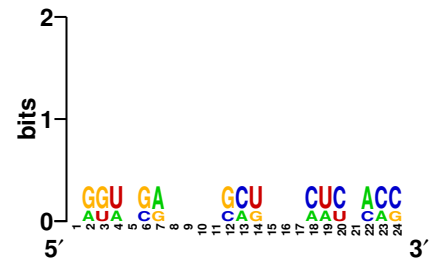

25-mers:

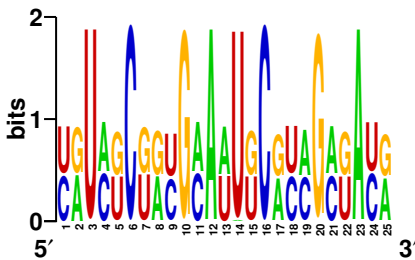

26-mers:



27-mers:

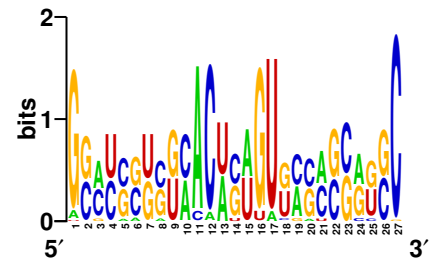

28-mers:

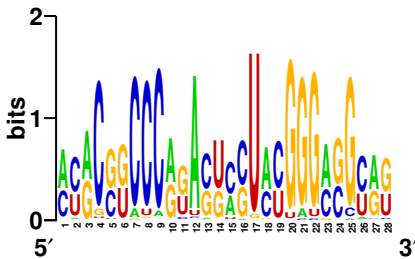

29-mers:

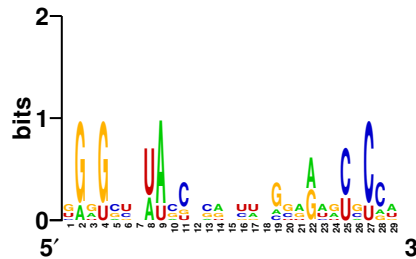

30-mers:

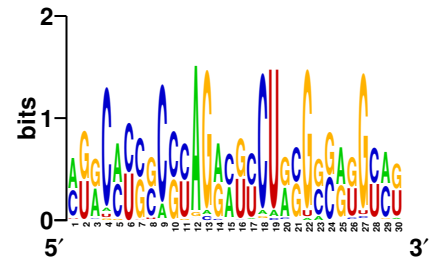

Embryo 36h, library 4:

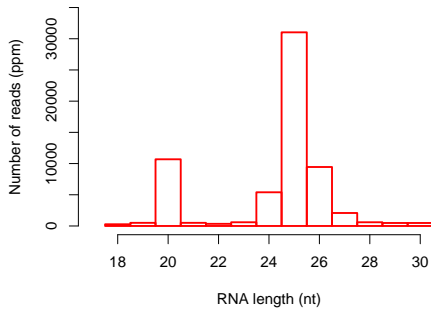

18-mers:

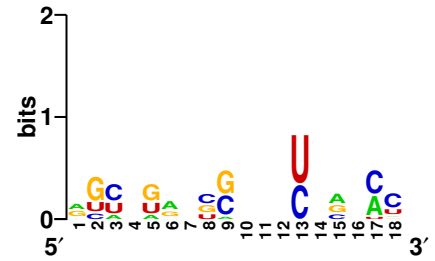

19-mers:

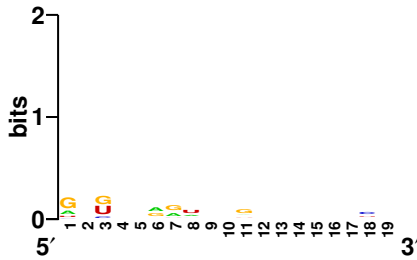

20-mers:

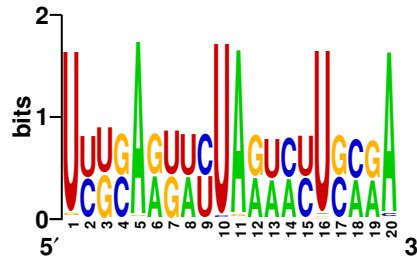

21-mers:

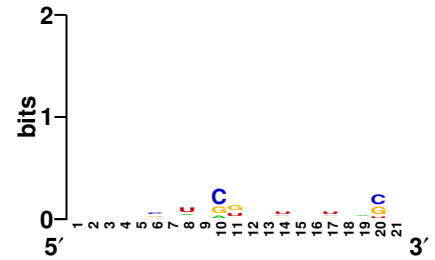

22-mers:

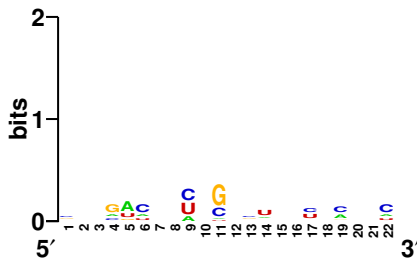

23-mers:

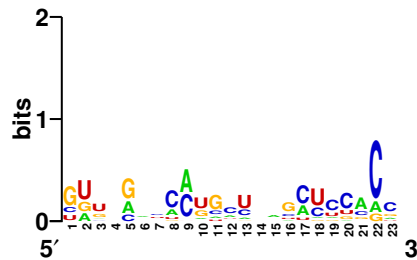

24-mers:

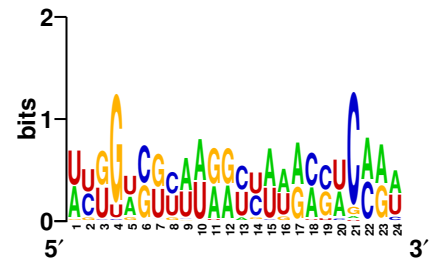

25-mers:

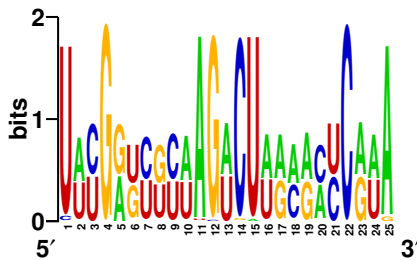

26-mers:

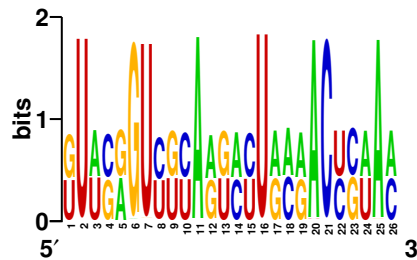

27-mers:

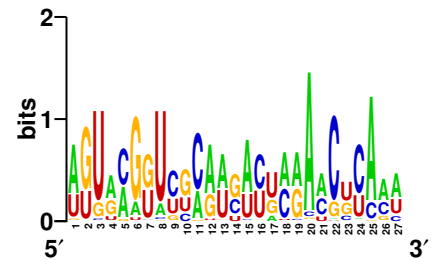

28-mers:

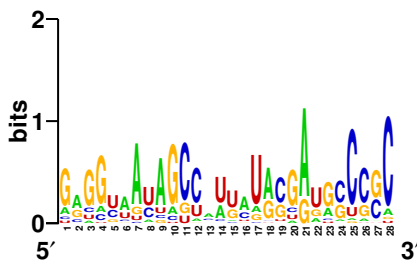

29-mers:

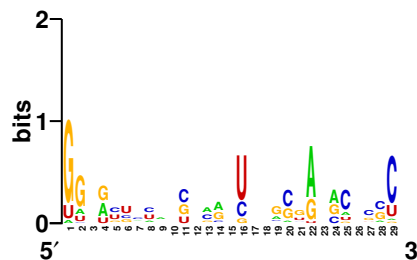

30-mers:

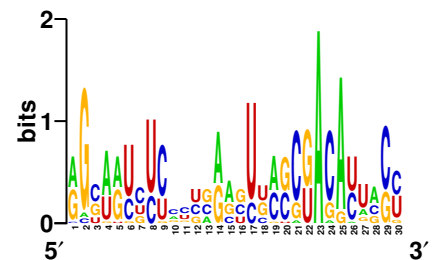

Embryo 60h, library 4:



19-mers:



22-mers:

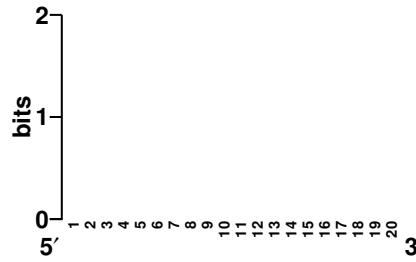

20-mers:



23-mers:

26-mers:

(no read)

29-mers:

(no read)

18-mers:

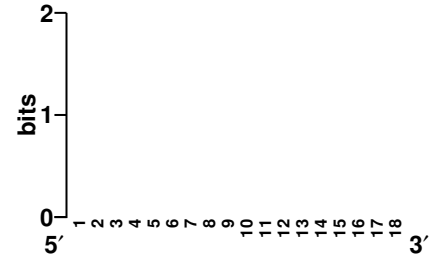

21-mers:



24-mers:

(no read)

27-mers:

(no read)

30-mers:

(no read)

(no read)

25-mers:



28-mers:

(no read)

Adult female, library 4:

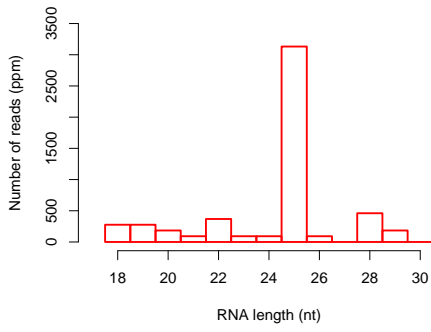

19-mers:

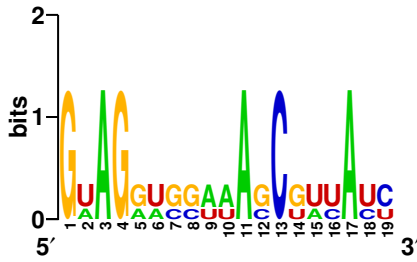

20-mers:

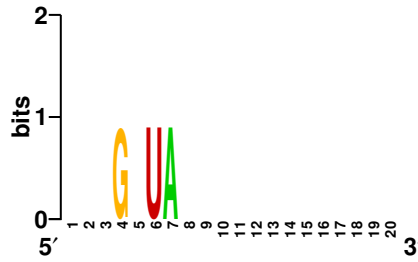

18-mers:

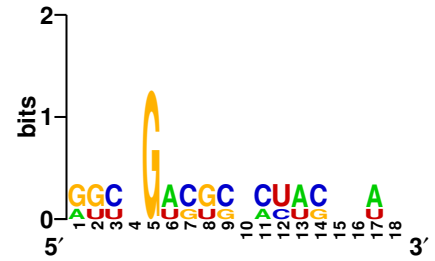

21-mers:



22-mers:

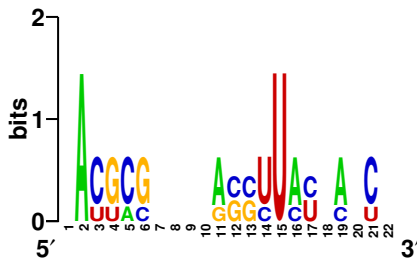

23-mers:



24-mers:

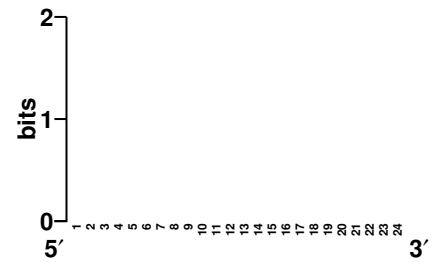

25-mers:

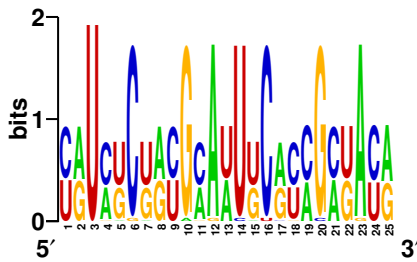

26-mers:

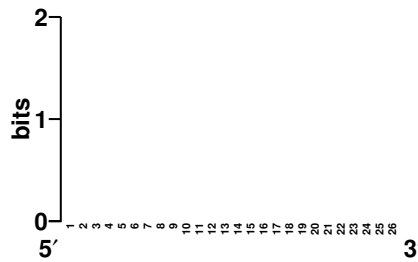

27-mers:

(no read)

28-mers:

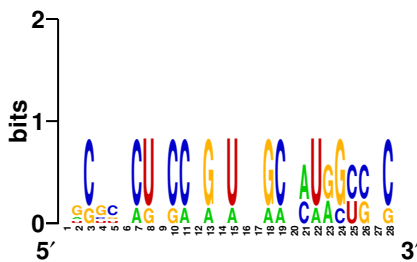

29-mers:

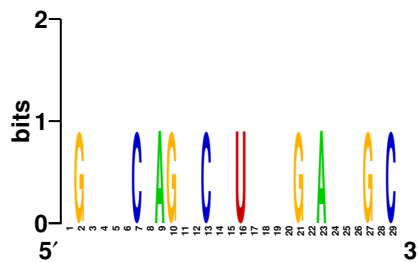

30-mers:

(no read)

Adult male, library 4:

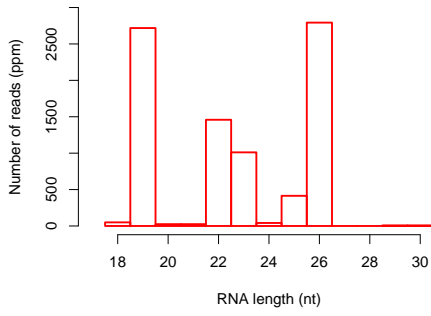

19-mers:

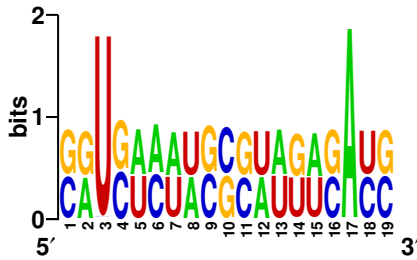

20-mers:

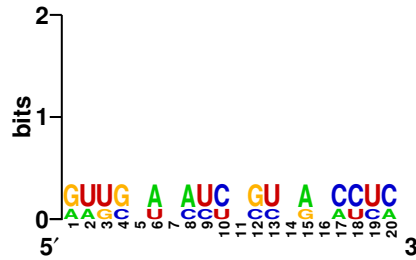

18-mers:

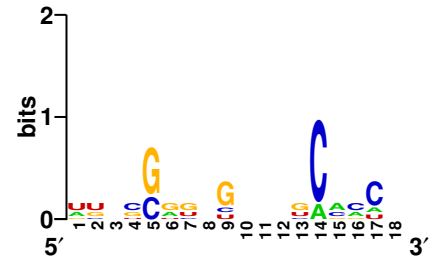

21-mers:

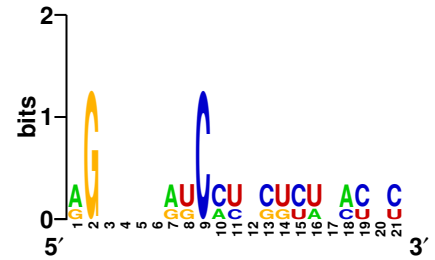

22-mers:

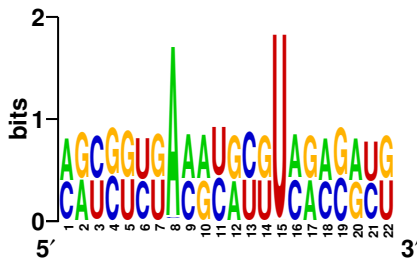

23-mers:

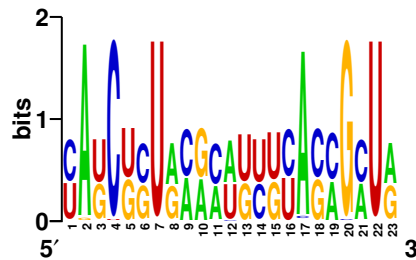

24-mers:

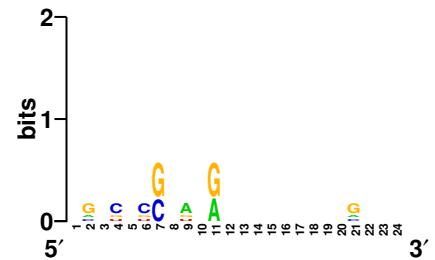

25-mers:

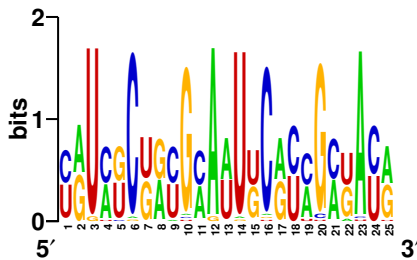

26-mers:

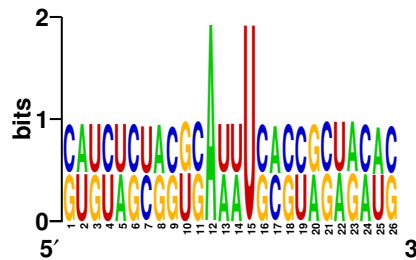

27-mers:

(no read)

30-mers:

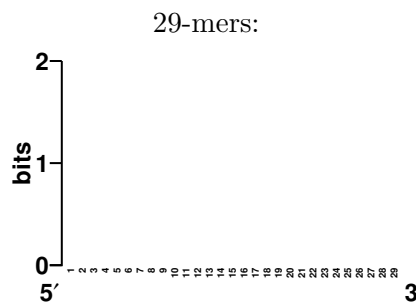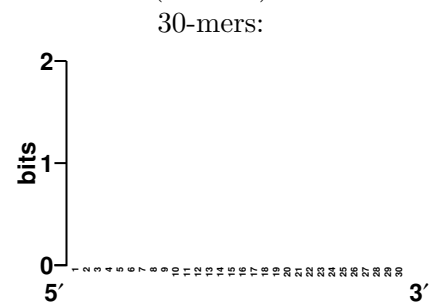

(no read)



# 10 Extragenomic and extratranscriptomic reads matching the ATCV1 genome

## 10.1 Libraries #1 (total 5' monophosphorylated small RNAs)

Embryo 8h, library 1:

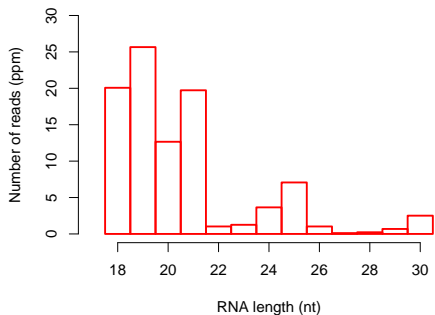

18-mers:

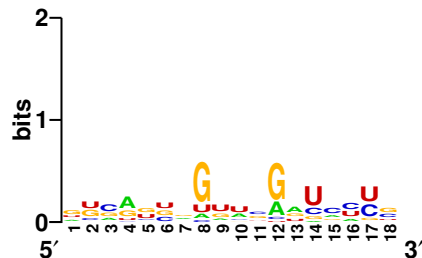

19-mers:

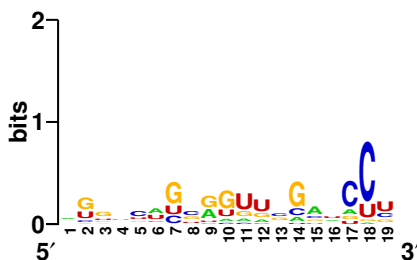

20-mers:

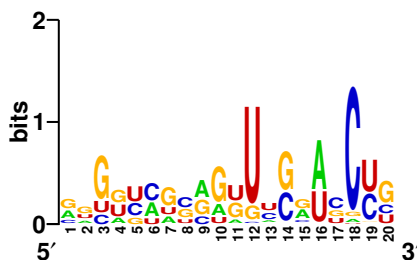

21-mers:

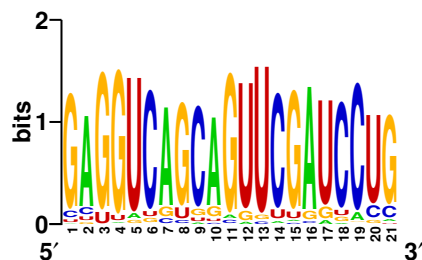

22-mers:

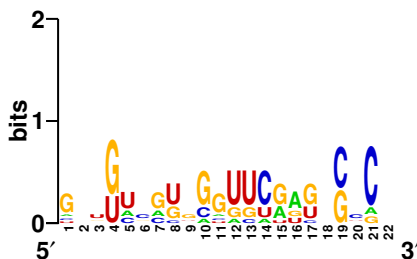

23-mers:

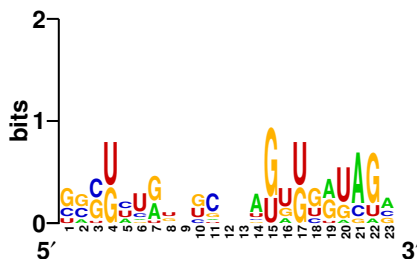

24-mers:

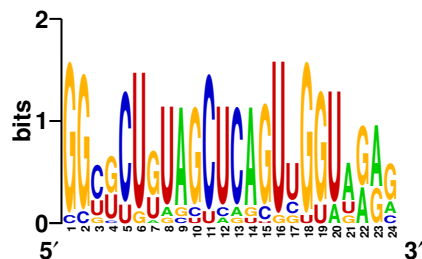

25-mers:

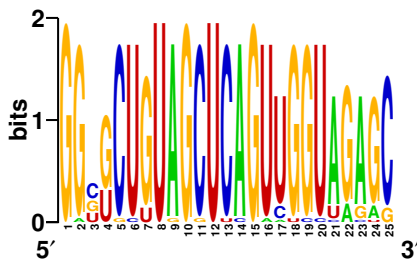

26-mers:

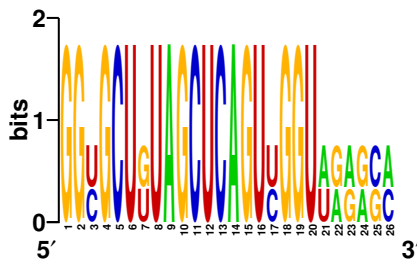

27-mers:

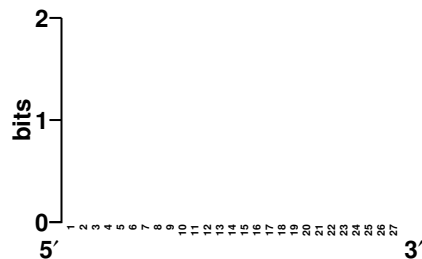

28-mers:

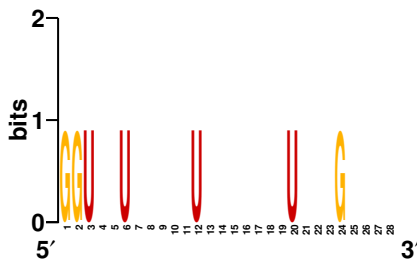

29-mers:

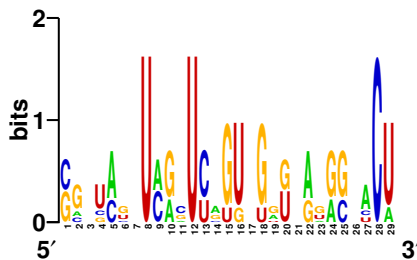

30-mers:

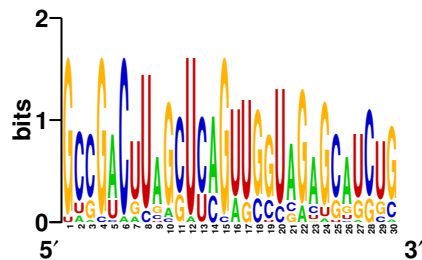

Embryo 15h, library 1:

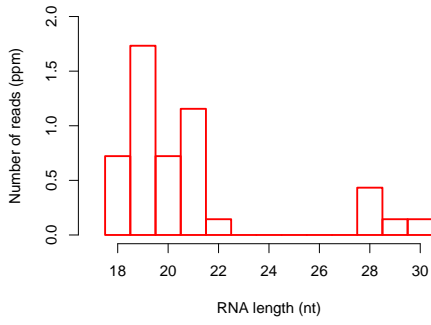

19-mers:

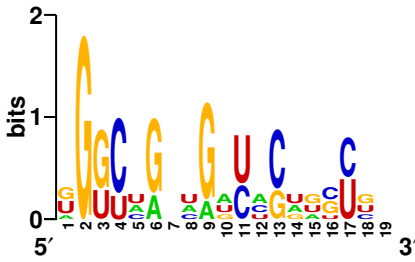

22-mers:

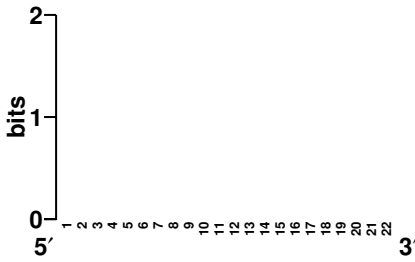

25-mers:  
(no read)  
28-mers:

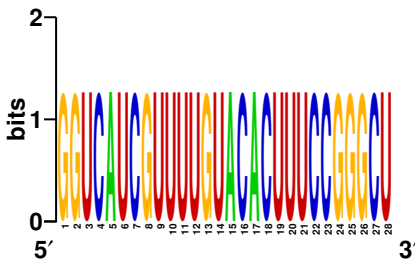

18-mers:

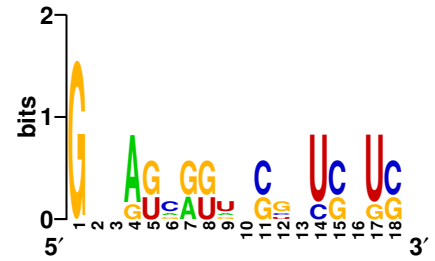

20-mers:

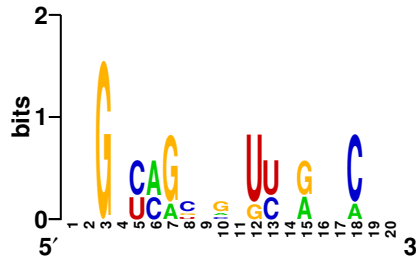

23-mers:

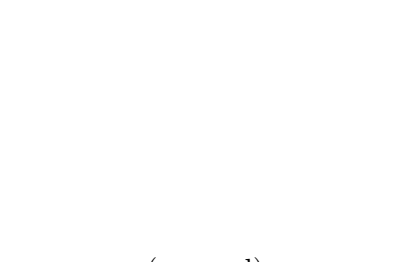

(no read)  
26-mers:  
(no read)  
29-mers:



21-mers:

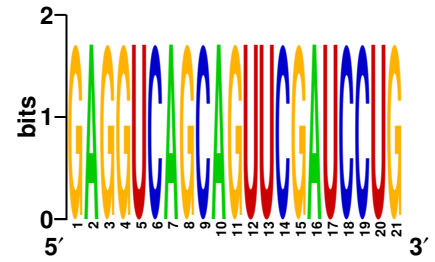

24-mers:

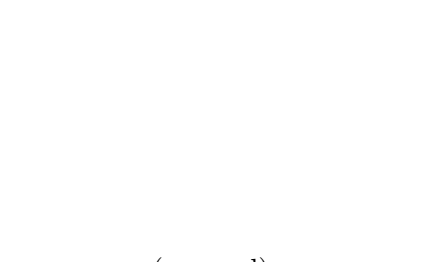

(no read)  
27-mers:  
(no read)  
30-mers:

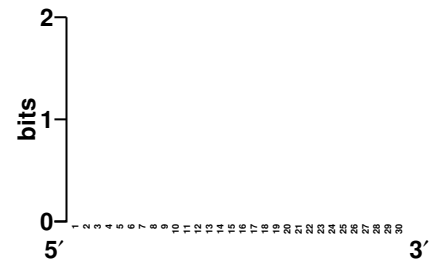

Embryo 36h, library 1:

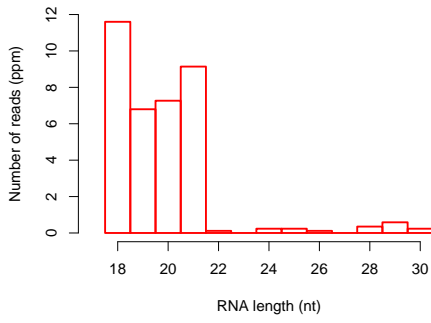

19-mers:

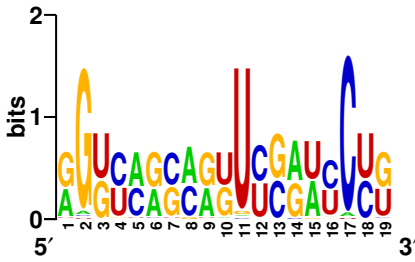

22-mers:



25-mers:

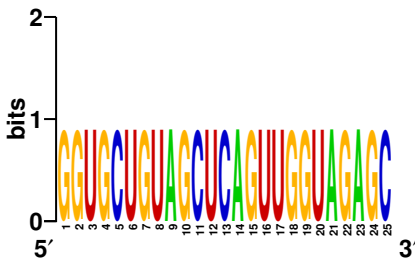

28-mers:

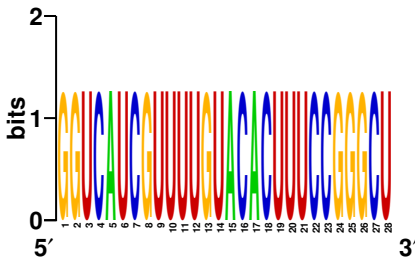

20-mers:

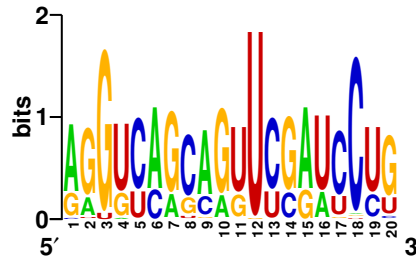

23-mers:

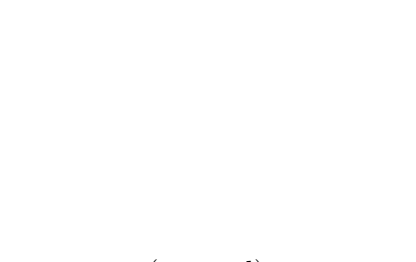

(no read)

26-mers:



29-mers:

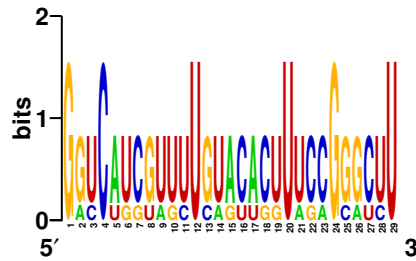

18-mers:

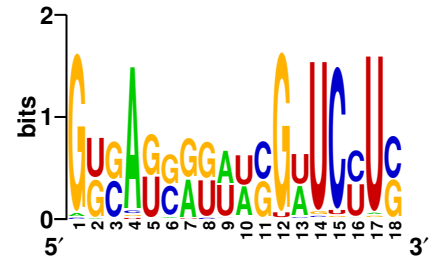

21-mers:

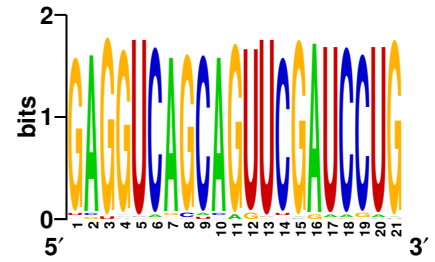

24-mers:

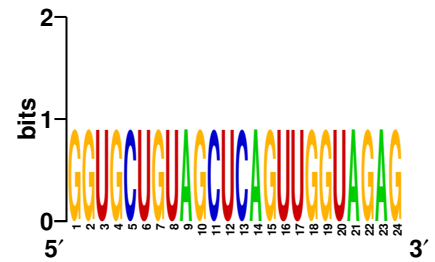

27-mers:

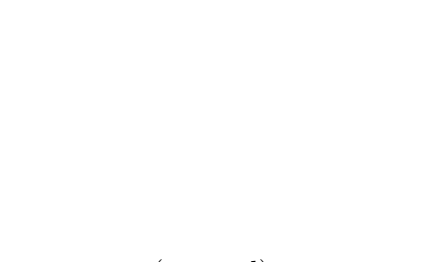

(no read)

30-mers:

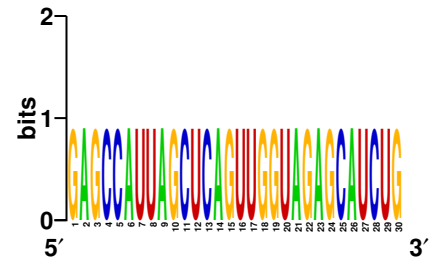

Embryo 60h, library 1:

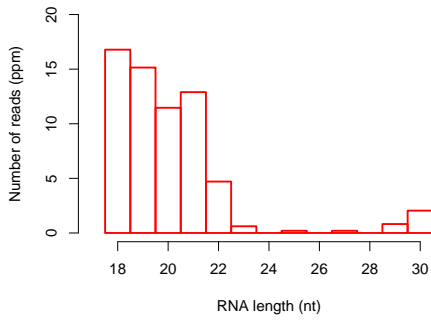

19-mers:

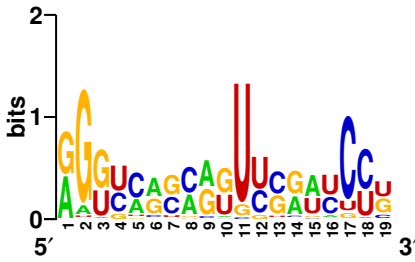

20-mers:

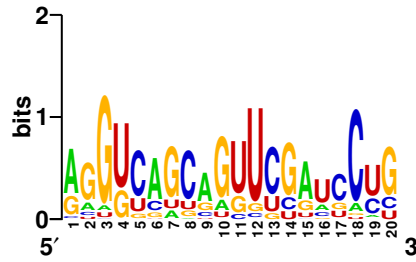

18-mers:

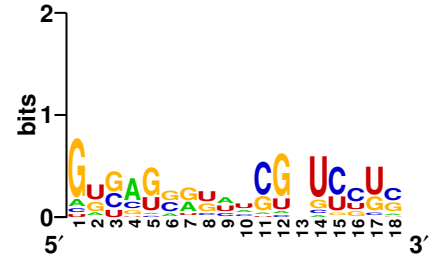

21-mers:

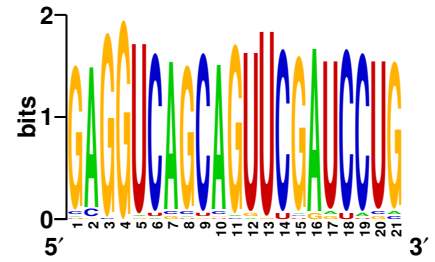

22-mers:

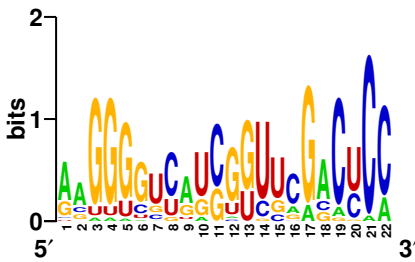

23-mers:

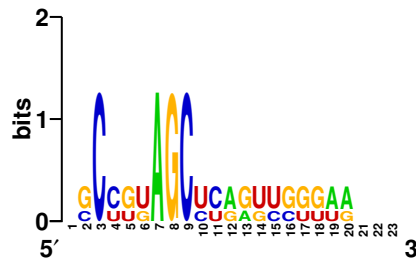

24-mers:

(no read)  
27-mers:



25-mers:

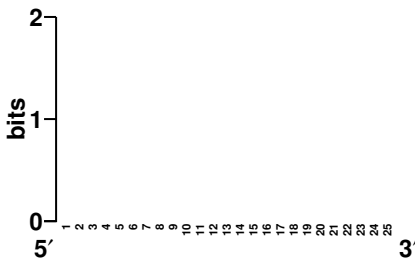

26-mers:

(no read)  
29-mers:

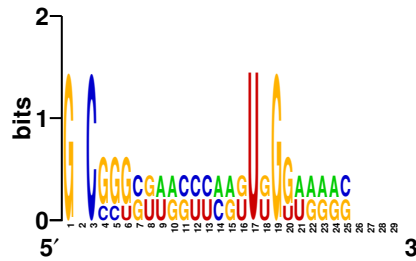

30-mers:

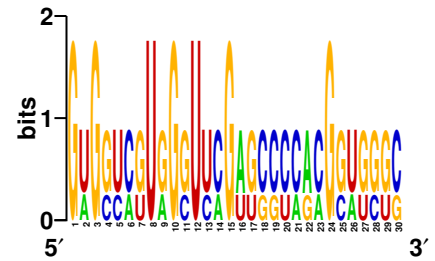

(no read)

Adult female, library 1:

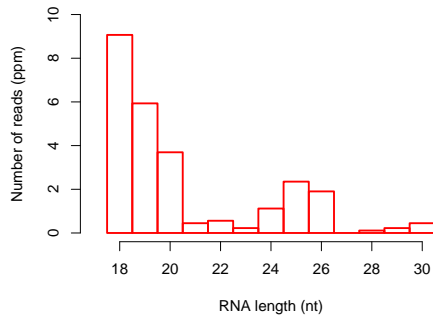

19-mers:

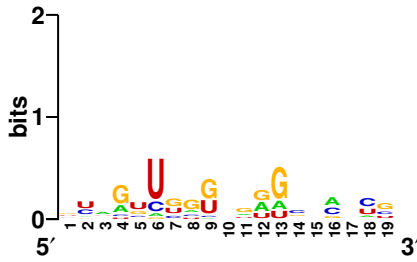

20-mers:

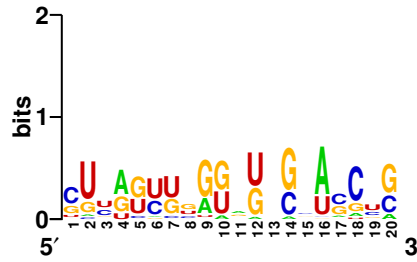

18-mers:

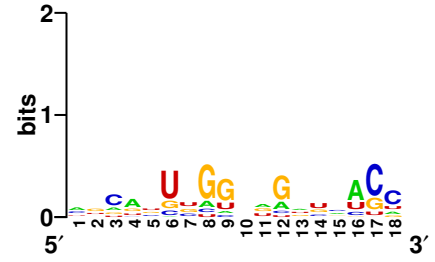

21-mers:

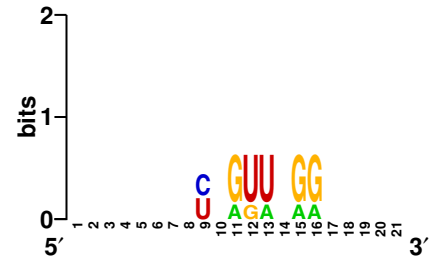

22-mers:

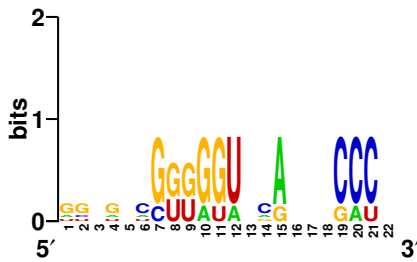

23-mers:

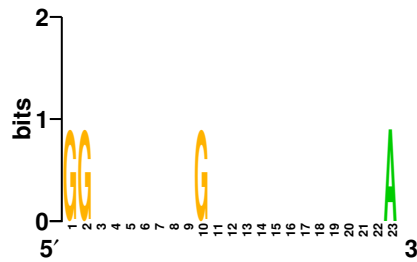

24-mers:

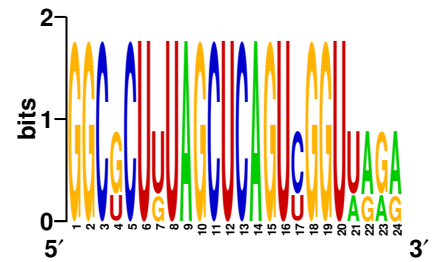

25-mers:

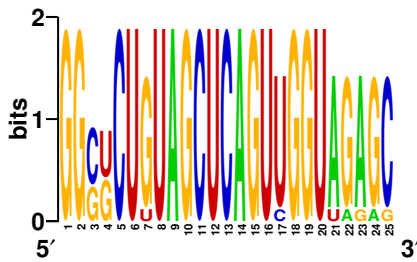

26-mers:

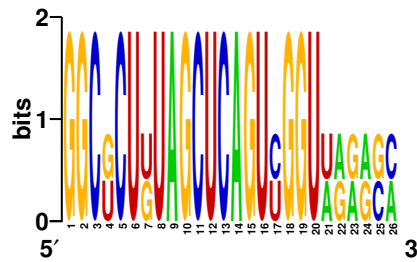

27-mers:



28-mers:



29-mers:

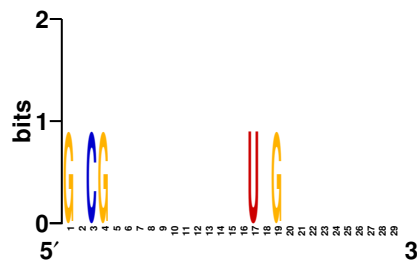

(no read)  
30-mers:

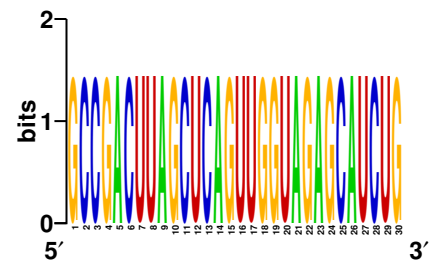

Adult male, library 1:

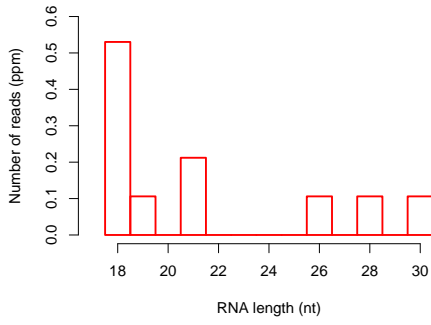

19-mers:



22-mers:  
(no read)  
25-mers:

(no read)  
28-mers:

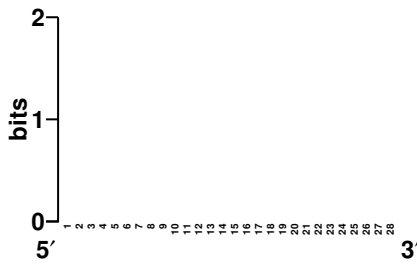

20-mers:

(no read)  
23-mers:  
(no read)  
26-mers:

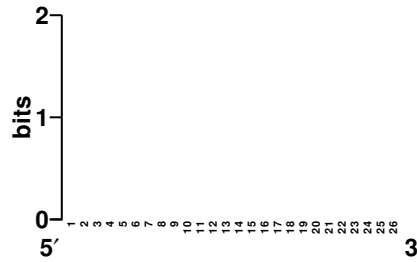

29-mers:

(no read)

18-mers:

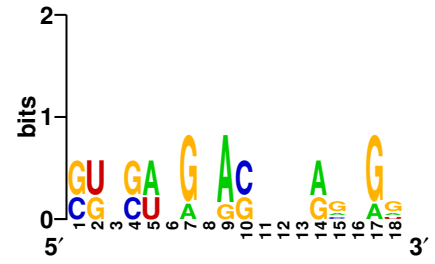

21-mers:

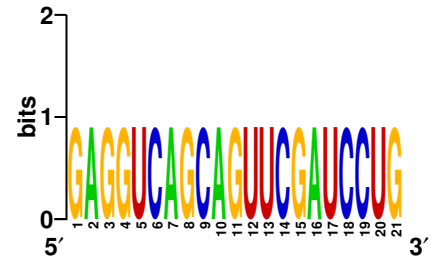

24-mers:  
(no read)  
27-mers:

(no read)  
30-mers:

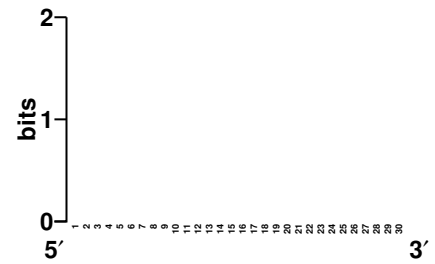

## 10.2 Libraries #2 (3' modified, 5' monophosphorylated small RNAs)

Embryo 8h, library 2:

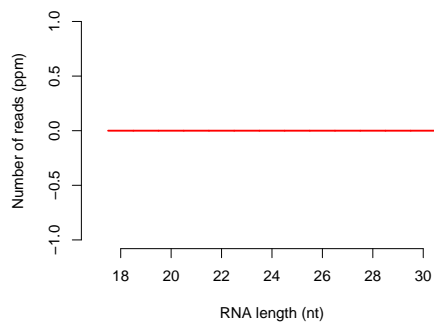

18-mers:

(no read)

19-mers:

20-mers:

21-mers:

(no read)

(no read)

(no read)

22-mers:

23-mers:

24-mers:

(no read)

(no read)

(no read)

25-mers:

26-mers:

27-mers:

(no read)

(no read)

(no read)

28-mers:

29-mers:

30-mers:

(no read)

(no read)

(no read)

Embryo 15h, library 2:

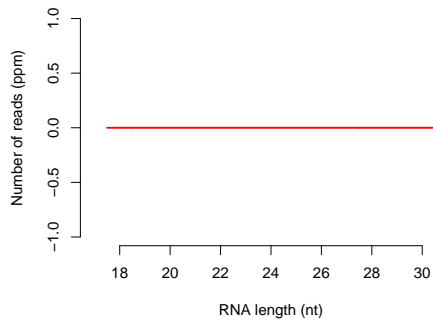

18-mers:

|           |           |           |           |           |           |
|-----------|-----------|-----------|-----------|-----------|-----------|
| 19-mers:  | (no read) | 20-mers:  | (no read) | 21-mers:  | (no read) |
| (no read) |           | (no read) |           | (no read) |           |
| 22-mers:  | (no read) | 23-mers:  | (no read) | 24-mers:  | (no read) |
| (no read) |           | (no read) |           | (no read) |           |
| 25-mers:  | (no read) | 26-mers:  | (no read) | 27-mers:  | (no read) |
| (no read) |           | (no read) |           | (no read) |           |
| 28-mers:  | (no read) | 29-mers:  | (no read) | 30-mers:  | (no read) |
| (no read) |           | (no read) |           | (no read) |           |



Embryo 36h, library 2:

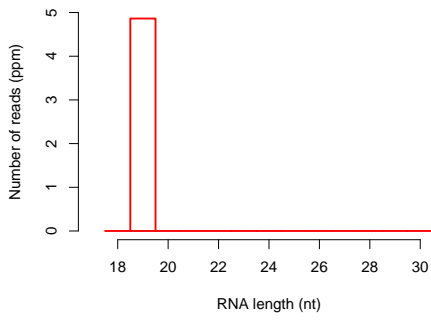

19-mers:

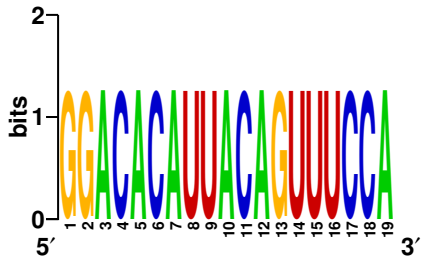

22-mers:  
 (no read)  
 25-mers:  
 (no read)  
 28-mers:  
 (no read)

18-mers:  
 20-mers: (no read)  
 21-mers:

(no read) (no read)  
 23-mers: 24-mers:  
 (no read) (no read)  
 26-mers: 27-mers:  
 (no read) (no read)  
 29-mers: 30-mers:  
 (no read) (no read)

Embryo 60h, library 2:



18-mers:

|           |           |           |           |
|-----------|-----------|-----------|-----------|
| 19-mers:  | (no read) | 20-mers:  | 21-mers:  |
| (no read) |           | (no read) | (no read) |
| 22-mers:  |           | 23-mers:  | 24-mers:  |
| (no read) |           | (no read) | (no read) |
| 25-mers:  |           | 26-mers:  | 27-mers:  |
| (no read) |           | (no read) | (no read) |
| 28-mers:  |           | 29-mers:  | 30-mers:  |
| (no read) |           | (no read) | (no read) |

Adult female, library 2:



18-mers:

|           |           |           |           |           |           |
|-----------|-----------|-----------|-----------|-----------|-----------|
| 19-mers:  | (no read) | 20-mers:  | (no read) | 21-mers:  | (no read) |
| (no read) |           | (no read) |           | (no read) |           |
| 22-mers:  | (no read) | 23-mers:  | (no read) | 24-mers:  | (no read) |
| (no read) |           | (no read) |           | (no read) |           |
| 25-mers:  | (no read) | 26-mers:  | (no read) | 27-mers:  | (no read) |
| (no read) |           | (no read) |           | (no read) |           |
| 28-mers:  | (no read) | 29-mers:  | (no read) | 30-mers:  | (no read) |
| (no read) |           | (no read) |           | (no read) |           |

Adult male, library 2:

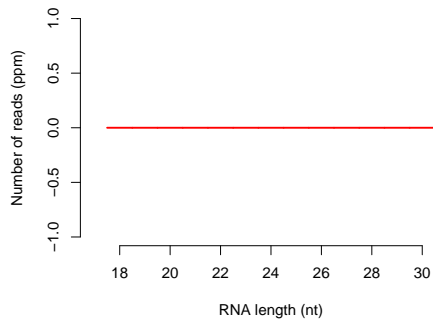

18-mers:

|           |           |           |           |           |           |
|-----------|-----------|-----------|-----------|-----------|-----------|
| 19-mers:  | (no read) | 20-mers:  | (no read) | 21-mers:  | (no read) |
| (no read) |           | (no read) |           | (no read) |           |
| 22-mers:  | (no read) | 23-mers:  | (no read) | 24-mers:  | (no read) |
| (no read) |           | (no read) |           | (no read) |           |
| 25-mers:  | (no read) | 26-mers:  | (no read) | 27-mers:  | (no read) |
| (no read) |           | (no read) |           | (no read) |           |
| 28-mers:  | (no read) | 29-mers:  | (no read) | 30-mers:  | (no read) |
| (no read) |           | (no read) |           | (no read) |           |

### 10.3 Libraries #3 (total 5' hydroxyl or polyphosphorylated small RNAs)

Embryo 8h, library 3:

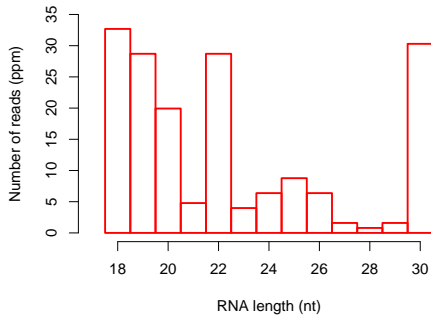

18-mers:

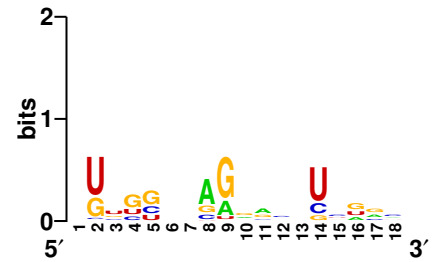

19-mers:

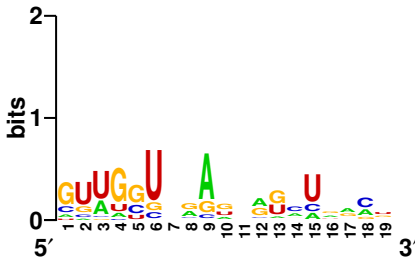

20-mers:

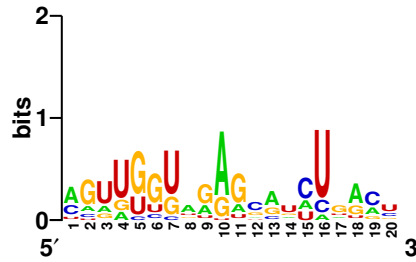

21-mers:

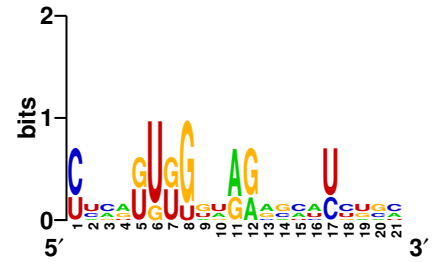

22-mers:

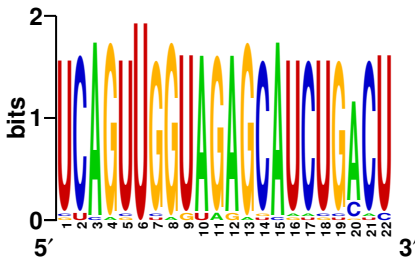

23-mers:

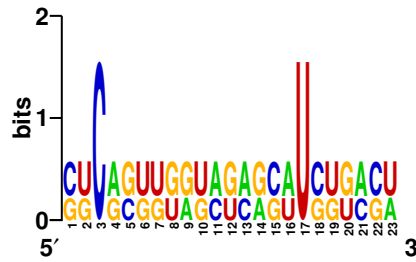

24-mers:

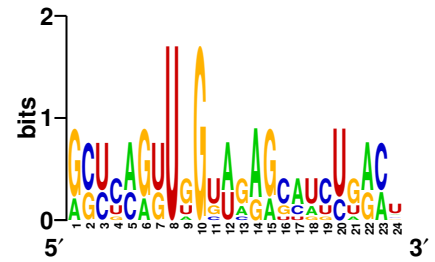

25-mers:

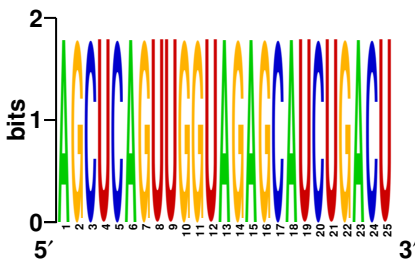

26-mers:

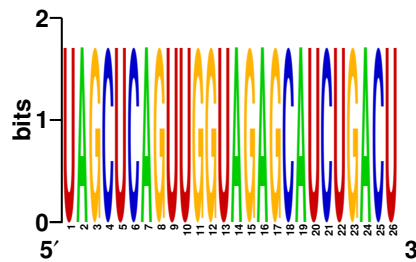

27-mers:

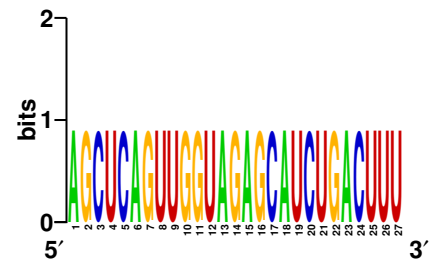

28-mers:

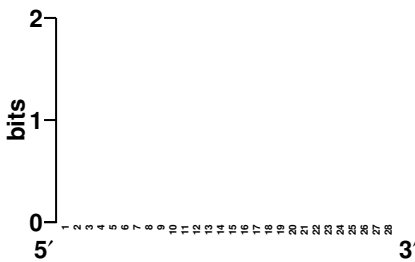

29-mers:

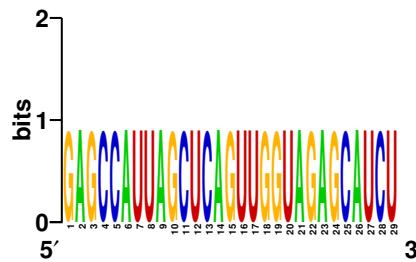

30-mers:

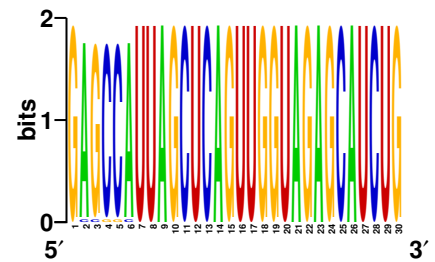



Embryo 36h, library 3:

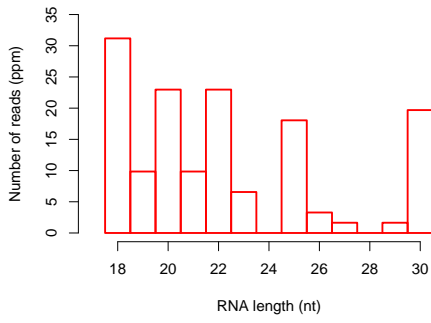

19-mers:

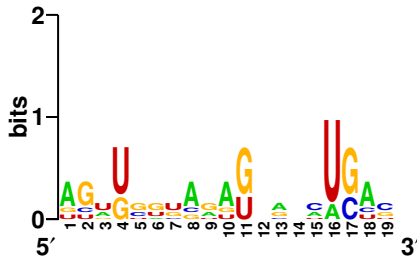

20-mers:

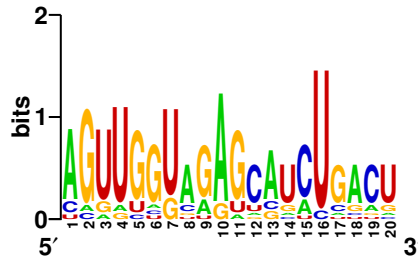

18-mers:

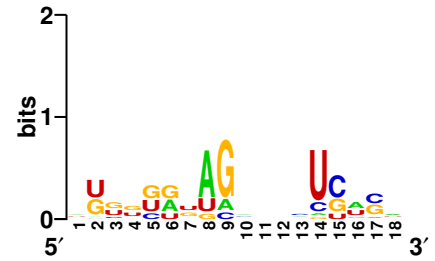

21-mers:

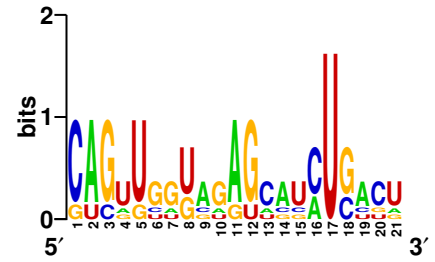

22-mers:

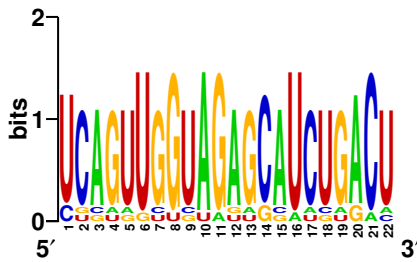

23-mers:

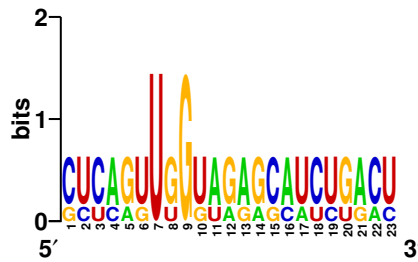

24-mers:

(no read)  
27-mers:

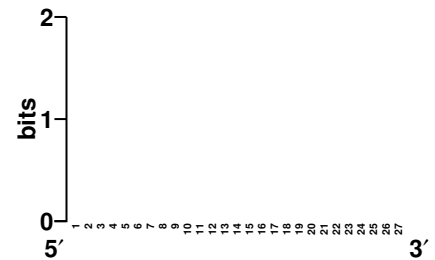

25-mers:

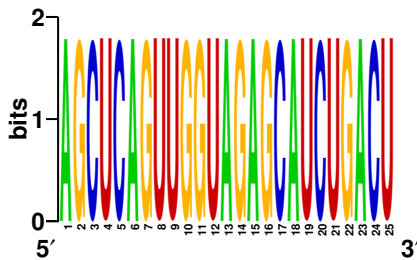

26-mers:

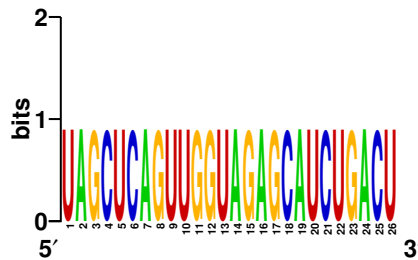

28-mers:

(no read)

29-mers:

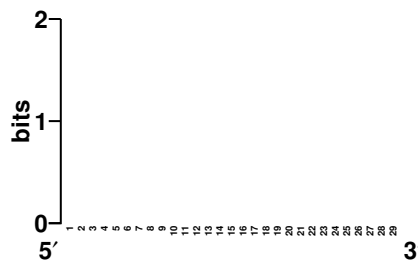

30-mers:

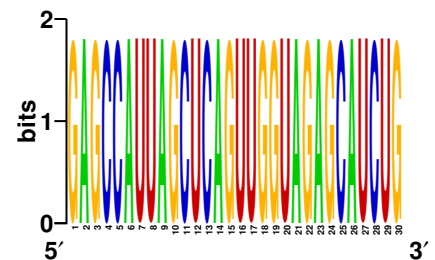

Embryo 60h, library 3:

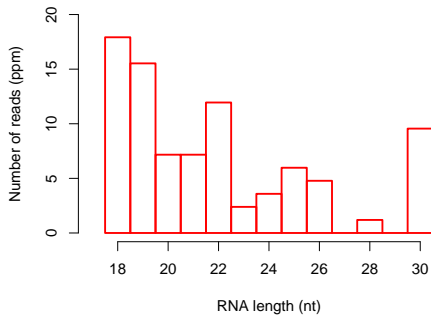

19-mers:

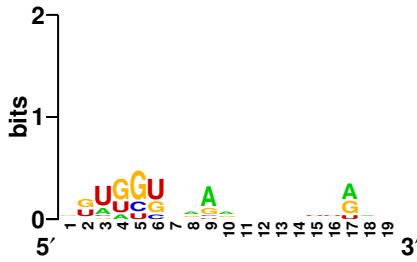

20-mers:

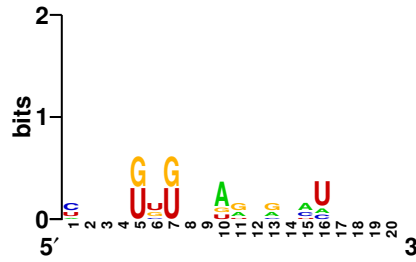

18-mers:

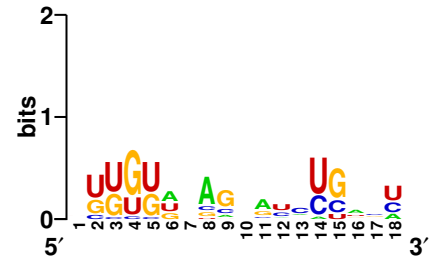

21-mers:

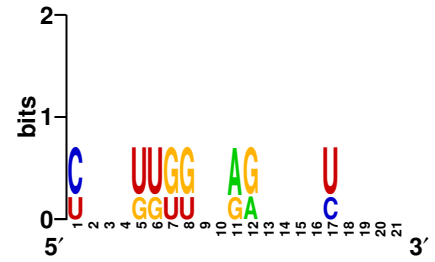

22-mers:

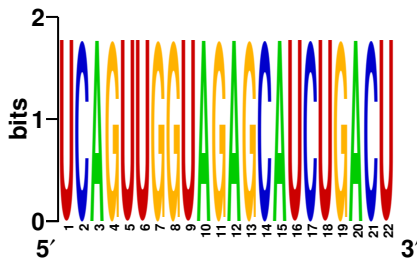

23-mers:

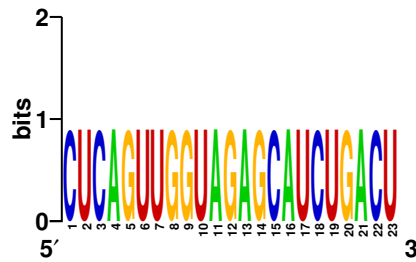

24-mers:

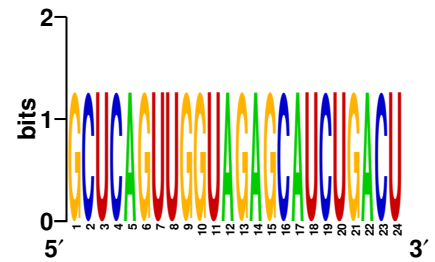

25-mers:

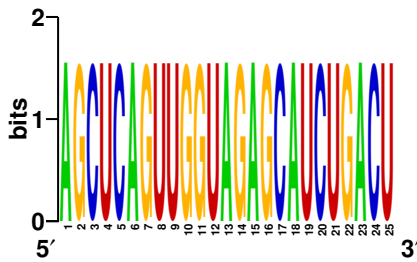

26-mers:

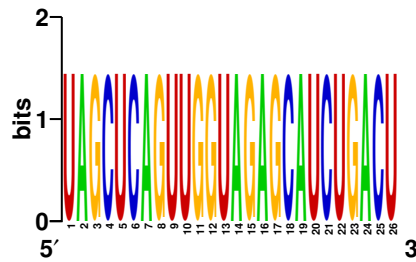

27-mers:



28-mers:



29-mers:

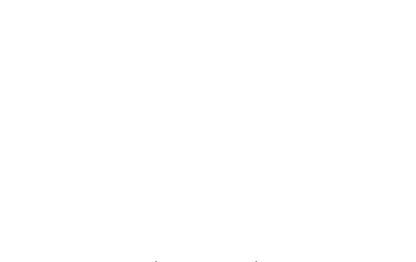

(no read)

30-mers:

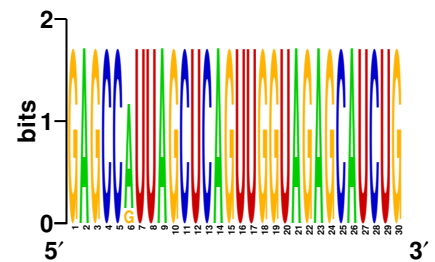

(no read)



Adult female, library 3:

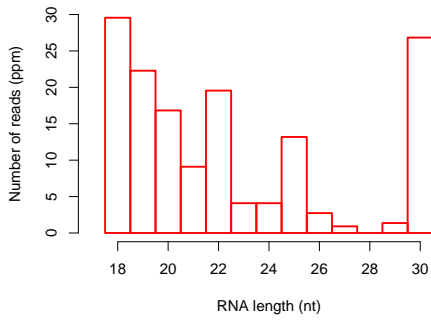

19-mers:

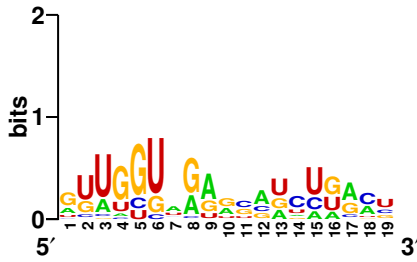

20-mers:

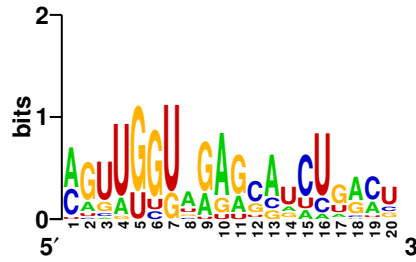

18-mers:

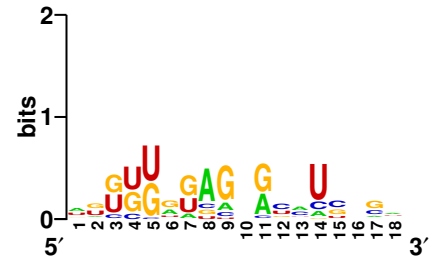

21-mers:

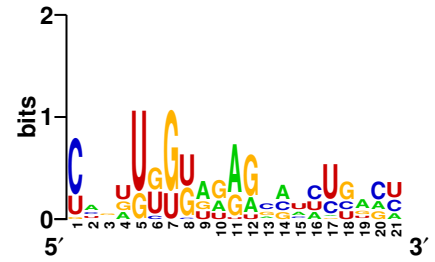

22-mers:

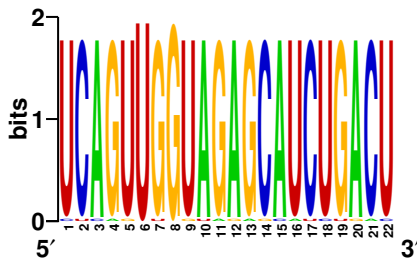

23-mers:

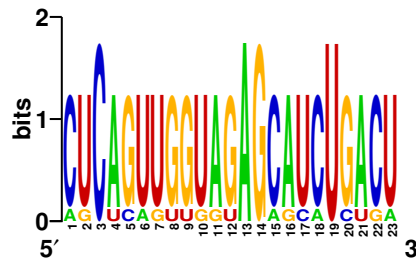

24-mers:

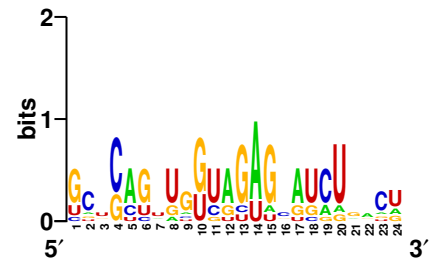

25-mers:

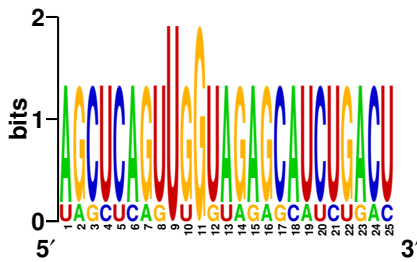

26-mers:

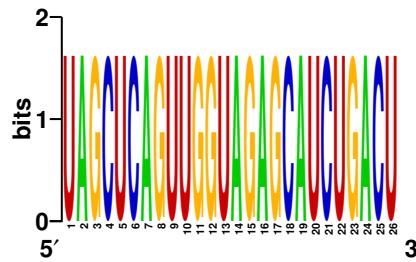

27-mers:

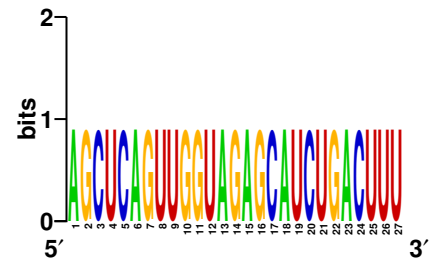

28-mers:

(no read)

29-mers:

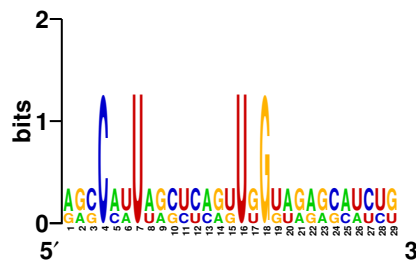

30-mers:

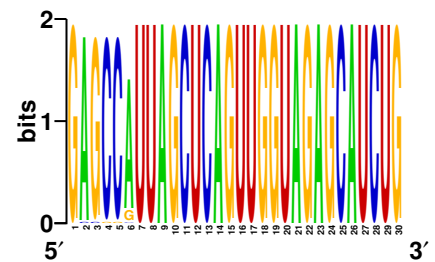

Adult male, library 3:

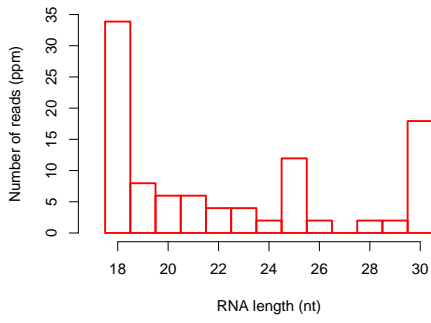

19-mers:

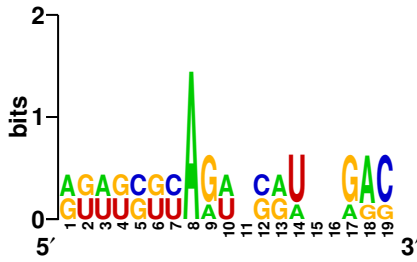

20-mers:

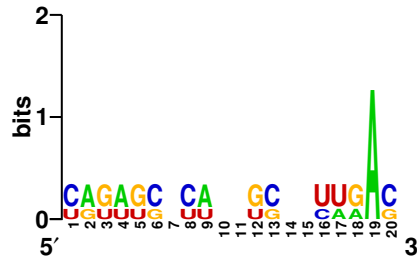

18-mers:

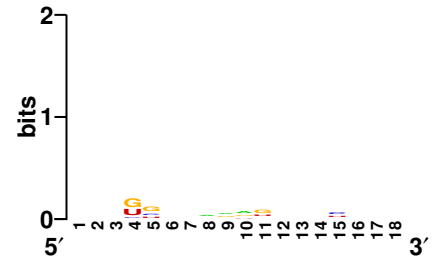

21-mers:

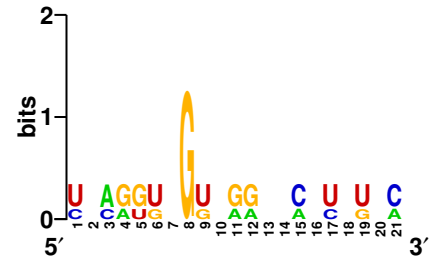

22-mers:

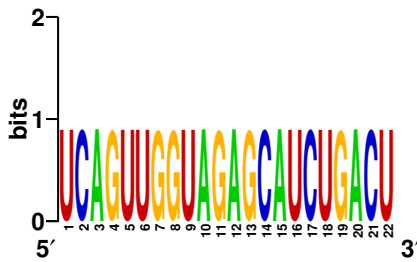

23-mers:

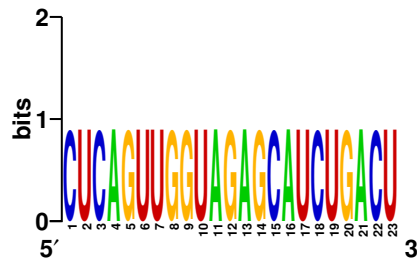

24-mers:



25-mers:

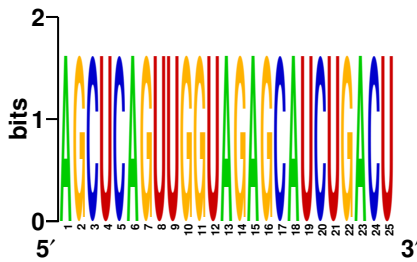

26-mers:



27-mers:

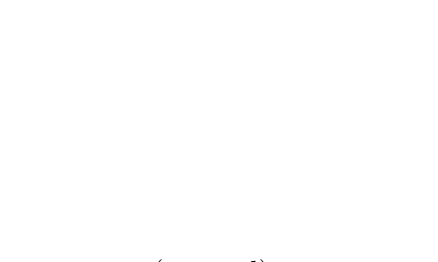

28-mers:



29-mers:



(no read)  
30-mers:

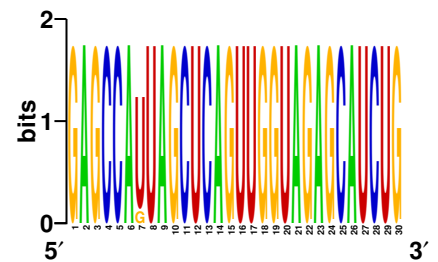

## 10.4 Libraries #4 (3' modified, 5' hydroxyl or polyphosphorylated small RNAs)

Embryo 8h, library 4:

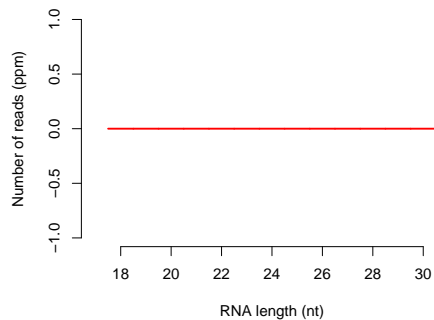

18-mers:

(no read)

19-mers:

20-mers:

21-mers:

(no read)

(no read)

(no read)

22-mers:

23-mers:

24-mers:

(no read)

(no read)

(no read)

25-mers:

26-mers:

27-mers:

(no read)

(no read)

(no read)

28-mers:

29-mers:

30-mers:

(no read)

(no read)

(no read)

Embryo 15h, library 4:



18-mers:

|           |           |           |           |
|-----------|-----------|-----------|-----------|
| 19-mers:  | (no read) | 20-mers:  | 21-mers:  |
| (no read) |           | (no read) | (no read) |
| 22-mers:  |           | 23-mers:  | 24-mers:  |
| (no read) |           | (no read) | (no read) |
| 25-mers:  |           | 26-mers:  | 27-mers:  |
| (no read) |           | (no read) | (no read) |
| 28-mers:  |           | 29-mers:  | 30-mers:  |
| (no read) |           | (no read) | (no read) |

Embryo 36h, library 4:



18-mers:

|           |           |           |           |           |           |
|-----------|-----------|-----------|-----------|-----------|-----------|
| 19-mers:  | (no read) | 20-mers:  | (no read) | 21-mers:  | (no read) |
| (no read) |           | (no read) |           | (no read) |           |
| 22-mers:  | (no read) | 23-mers:  | (no read) | 24-mers:  | (no read) |
| (no read) |           | (no read) |           | (no read) |           |
| 25-mers:  | (no read) | 26-mers:  | (no read) | 27-mers:  | (no read) |
| (no read) |           | (no read) |           | (no read) |           |
| 28-mers:  | (no read) | 29-mers:  | (no read) | 30-mers:  | (no read) |
| (no read) |           | (no read) |           | (no read) |           |

Embryo 60h, library 4:



18-mers:

|           |           |           |           |           |           |
|-----------|-----------|-----------|-----------|-----------|-----------|
| 19-mers:  | (no read) | 20-mers:  | (no read) | 21-mers:  | (no read) |
| (no read) |           | (no read) |           | (no read) |           |
| 22-mers:  | (no read) | 23-mers:  | (no read) | 24-mers:  | (no read) |
| (no read) |           | (no read) |           | (no read) |           |
| 25-mers:  | (no read) | 26-mers:  | (no read) | 27-mers:  | (no read) |
| (no read) |           | (no read) |           | (no read) |           |
| 28-mers:  | (no read) | 29-mers:  | (no read) | 30-mers:  | (no read) |
| (no read) |           | (no read) |           | (no read) |           |

Adult female, library 4:



18-mers:

|           |           |           |           |           |           |
|-----------|-----------|-----------|-----------|-----------|-----------|
| 19-mers:  | (no read) | 20-mers:  | (no read) | 21-mers:  | (no read) |
| (no read) |           | (no read) |           | (no read) |           |
| 22-mers:  | (no read) | 23-mers:  | (no read) | 24-mers:  | (no read) |
| (no read) |           | (no read) |           | (no read) |           |
| 25-mers:  | (no read) | 26-mers:  | (no read) | 27-mers:  | (no read) |
| (no read) |           | (no read) |           | (no read) |           |
| 28-mers:  | (no read) | 29-mers:  | (no read) | 30-mers:  | (no read) |
| (no read) |           | (no read) |           | (no read) |           |

Adult male, library 4:



18-mers:

|           |           |           |           |           |           |
|-----------|-----------|-----------|-----------|-----------|-----------|
| 19-mers:  | (no read) | 20-mers:  | (no read) | 21-mers:  | (no read) |
| (no read) |           | (no read) |           | (no read) |           |
| 22-mers:  | (no read) | 23-mers:  | (no read) | 24-mers:  | (no read) |
| (no read) |           | (no read) |           | (no read) |           |
| 25-mers:  | (no read) | 26-mers:  | (no read) | 27-mers:  | (no read) |
| (no read) |           | (no read) |           | (no read) |           |
| 28-mers:  | (no read) | 29-mers:  | (no read) | 30-mers:  | (no read) |
| (no read) |           | (no read) |           | (no read) |           |



# 11 Extragenomic and extratranscriptomic reads matching extragenomic contig #18690

## 11.1 Libraries #1 (total 5' monophosphorylated small RNAs)

Embryo 8h, library 1:

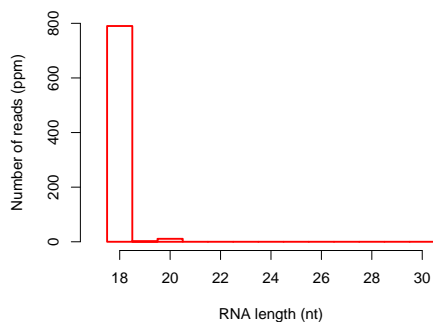

19-mers:

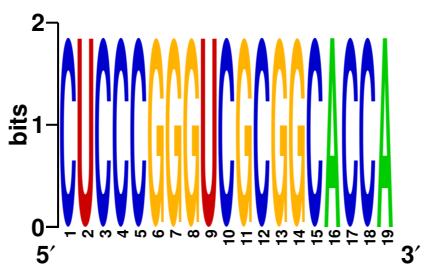

20-mers:

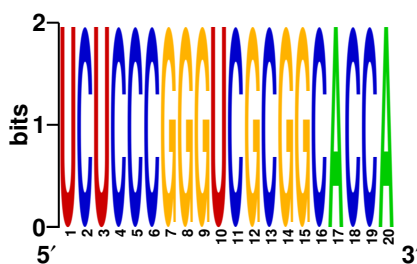

18-mers:

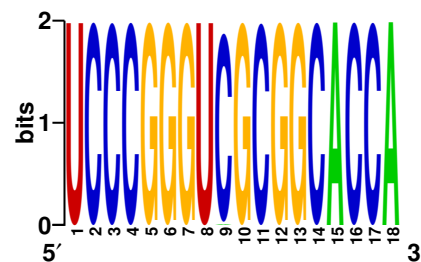

21-mers:

22-mers:  
(no read)  
25-mers:  
(no read)  
28-mers:  
(no read)

23-mers:  
(no read)  
26-mers:  
(no read)  
29-mers:  
(no read)

(no read)  
24-mers:  
(no read)  
27-mers:  
(no read)  
30-mers:  
(no read)

Embryo 15h, library 1:

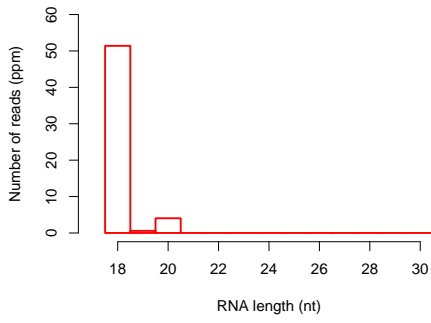

19-mers:

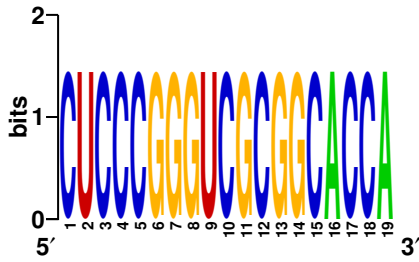

- 22-mers:
- (no read)
- 25-mers:
- (no read)
- 28-mers:
- (no read)

20-mers:

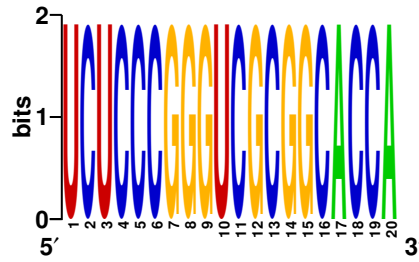

- 23-mers:
- (no read)
- 26-mers:
- (no read)
- 29-mers:
- (no read)

18-mers:

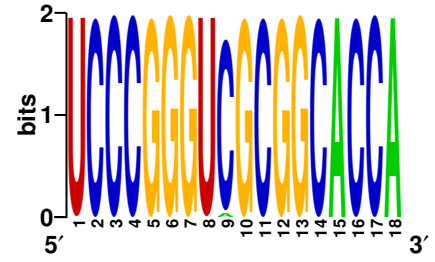

21-mers:

- (no read)
- 24-mers:
- (no read)
- 27-mers:
- (no read)
- 30-mers:
- (no read)





Adult female, library 1:

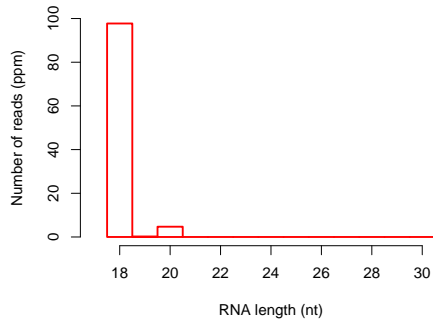

19-mers:

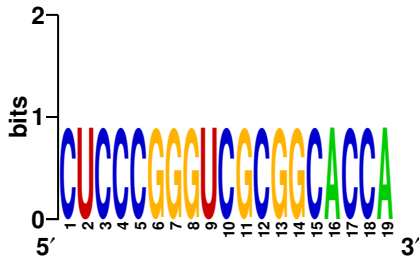

22-mers:  
(no read)  
25-mers:  
(no read)  
28-mers:  
(no read)

20-mers:

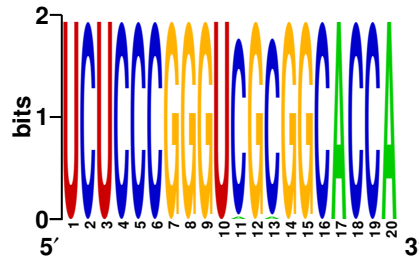

23-mers:  
(no read)  
26-mers:  
(no read)  
29-mers:  
(no read)

18-mers:

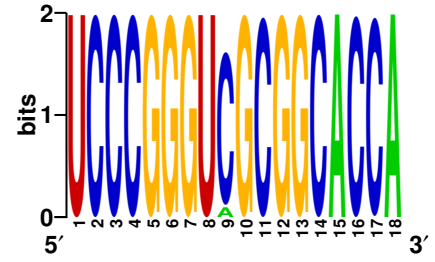

21-mers:

(no read)  
24-mers:  
(no read)  
27-mers:  
(no read)  
30-mers:  
(no read)

Adult male, library 1:

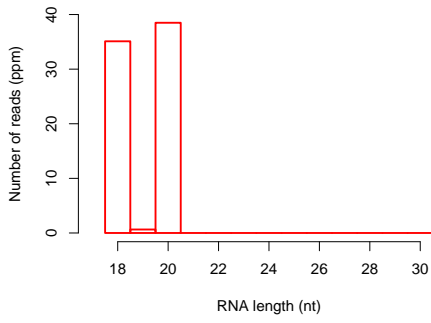

19-mers:

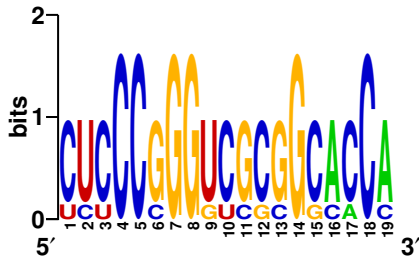

- 22-mers:
- (no read)
- 25-mers:
- (no read)
- 28-mers:
- (no read)

20-mers:

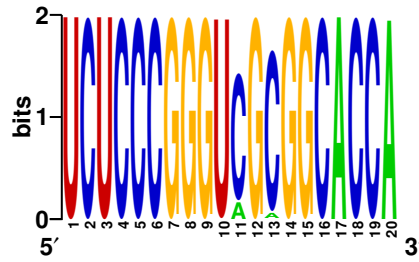

- 23-mers:
- (no read)
- 26-mers:
- (no read)
- 29-mers:
- (no read)

18-mers:

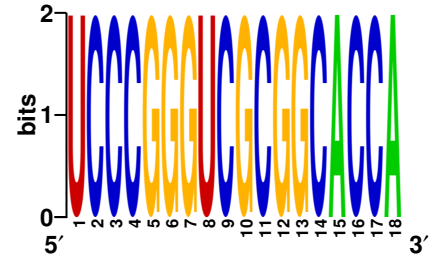

21-mers:

- (no read)
- 24-mers:
- (no read)
- 27-mers:
- (no read)
- 30-mers:
- (no read)

## 11.2 Libraries #2 (3' modified, 5' monophosphorylated small RNAs)

Embryo 8h, library 2:

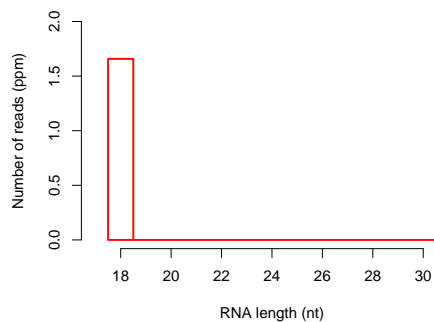

18-mers:

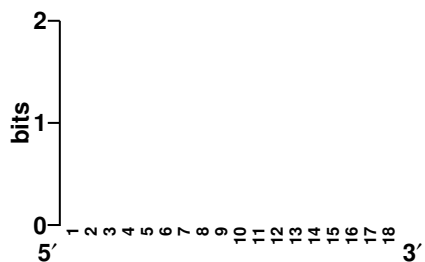

19-mers:

(no read)

22-mers:

(no read)

25-mers:

(no read)

28-mers:

(no read)

20-mers:

(no read)

23-mers:

(no read)

26-mers:

(no read)

29-mers:

(no read)

21-mers:

(no read)

24-mers:

(no read)

27-mers:

(no read)

30-mers:

(no read)

Embryo 15h, library 2:

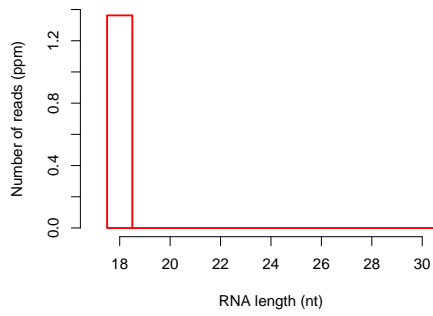

18-mers:

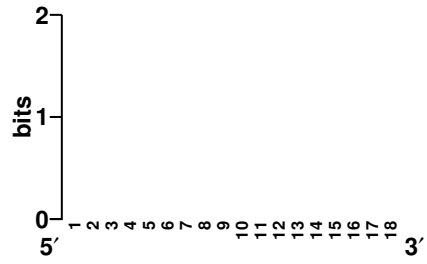

19-mers:  
(no read)  
22-mers:  
(no read)  
25-mers:  
(no read)  
28-mers:  
(no read)

20-mers:  
(no read)  
23-mers:  
(no read)  
26-mers:  
(no read)  
29-mers:  
(no read)

21-mers:  
(no read)  
24-mers:  
(no read)  
27-mers:  
(no read)  
30-mers:  
(no read)



Embryo 36h, library 2:



18-mers:

|           |           |           |           |           |           |
|-----------|-----------|-----------|-----------|-----------|-----------|
| 19-mers:  | (no read) | 20-mers:  | (no read) | 21-mers:  | (no read) |
| (no read) |           | (no read) |           | (no read) |           |
| 22-mers:  | (no read) | 23-mers:  | (no read) | 24-mers:  | (no read) |
| (no read) |           | (no read) |           | (no read) |           |
| 25-mers:  | (no read) | 26-mers:  | (no read) | 27-mers:  | (no read) |
| (no read) |           | (no read) |           | (no read) |           |
| 28-mers:  | (no read) | 29-mers:  | (no read) | 30-mers:  | (no read) |
| (no read) |           | (no read) |           | (no read) |           |

Embryo 60h, library 2:



18-mers:

|           |           |           |           |           |           |
|-----------|-----------|-----------|-----------|-----------|-----------|
| 19-mers:  | (no read) | 20-mers:  | (no read) | 21-mers:  | (no read) |
| (no read) |           | (no read) |           | (no read) |           |
| 22-mers:  | (no read) | 23-mers:  | (no read) | 24-mers:  | (no read) |
| (no read) |           | (no read) |           | (no read) |           |
| 25-mers:  | (no read) | 26-mers:  | (no read) | 27-mers:  | (no read) |
| (no read) |           | (no read) |           | (no read) |           |
| 28-mers:  | (no read) | 29-mers:  | (no read) | 30-mers:  | (no read) |
| (no read) |           | (no read) |           | (no read) |           |

Adult female, library 2:



18-mers:

|           |           |           |           |           |           |
|-----------|-----------|-----------|-----------|-----------|-----------|
| 19-mers:  | (no read) | 20-mers:  | (no read) | 21-mers:  | (no read) |
| (no read) |           | (no read) |           | (no read) |           |
| 22-mers:  | (no read) | 23-mers:  | (no read) | 24-mers:  | (no read) |
| (no read) |           | (no read) |           | (no read) |           |
| 25-mers:  | (no read) | 26-mers:  | (no read) | 27-mers:  | (no read) |
| (no read) |           | (no read) |           | (no read) |           |
| 28-mers:  | (no read) | 29-mers:  | (no read) | 30-mers:  | (no read) |
| (no read) |           | (no read) |           | (no read) |           |

Adult male, library 2:

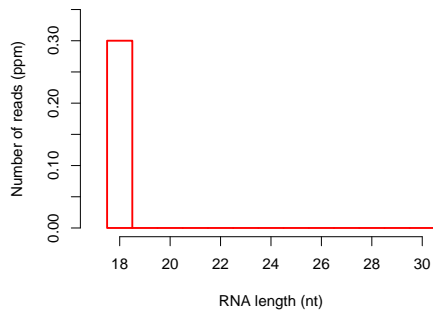

18-mers:



19-mers:  
(no read)  
22-mers:  
(no read)  
25-mers:  
(no read)  
28-mers:  
(no read)

20-mers:  
(no read)  
23-mers:  
(no read)  
26-mers:  
(no read)  
29-mers:  
(no read)

21-mers:  
(no read)  
24-mers:  
(no read)  
27-mers:  
(no read)  
30-mers:  
(no read)

### 11.3 Libraries #3 (total 5' hydroxyl or polyphosphorylated small RNAs)

Embryo 8h, library 3:

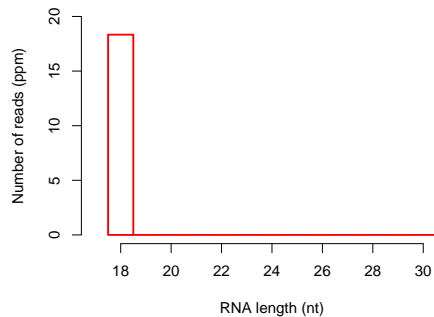

18-mers:

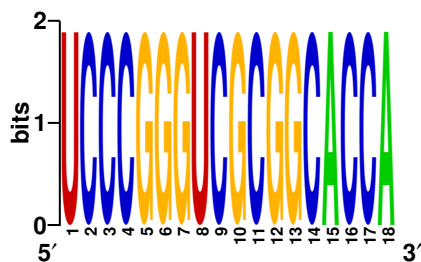

19-mers:

(no read)

22-mers:

(no read)

25-mers:

(no read)

28-mers:

(no read)

20-mers:

(no read)

23-mers:

(no read)

26-mers:

(no read)

29-mers:

(no read)

21-mers:

(no read)

24-mers:

(no read)

27-mers:

(no read)

30-mers:

(no read)

Embryo 15h, library 3:

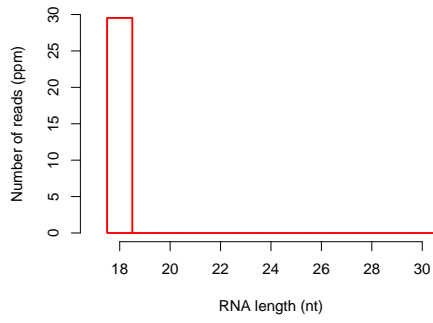

18-mers:

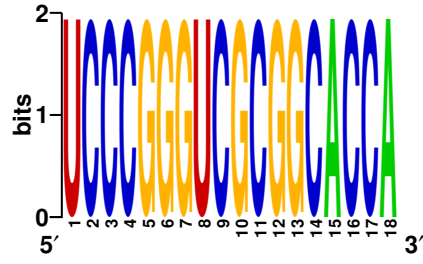

19-mers:  
(no read)  
22-mers:  
(no read)  
25-mers:  
(no read)  
28-mers:  
(no read)

20-mers:  
(no read)  
23-mers:  
(no read)  
26-mers:  
(no read)  
29-mers:  
(no read)

21-mers:  
(no read)  
24-mers:  
(no read)  
27-mers:  
(no read)  
30-mers:  
(no read)

Embryo 36h, library 3:

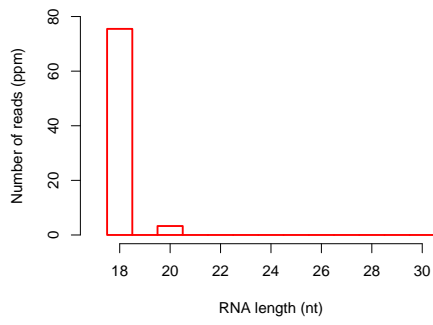

19-mers:

(no read)  
 22-mers:  
 (no read)  
 25-mers:  
 (no read)  
 28-mers:  
 (no read)

20-mers:

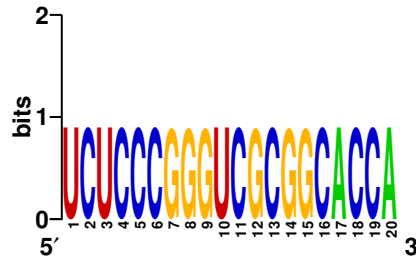

23-mers:  
 (no read)  
 26-mers:  
 (no read)  
 29-mers:  
 (no read)

18-mers:

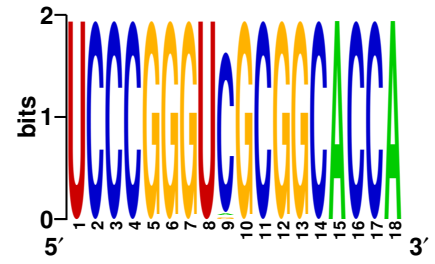

21-mers:

(no read)  
 24-mers:  
 (no read)  
 27-mers:  
 (no read)  
 30-mers:  
 (no read)

Embryo 60h, library 3:

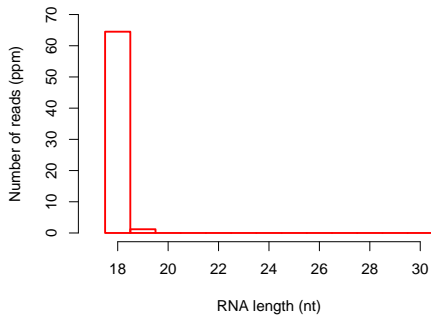

18-mers:

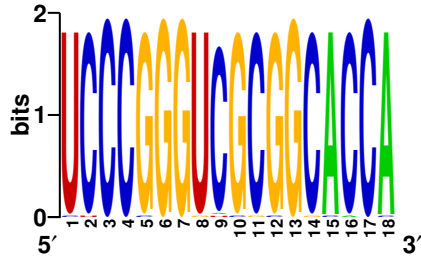

19-mers:

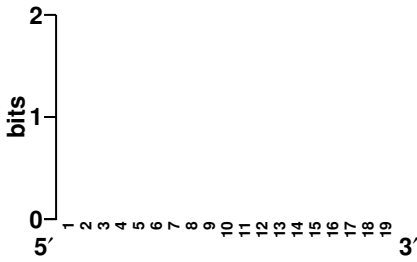

20-mers:

21-mers:

(no read)

(no read)

22-mers:

(no read)

(no read)

(no read)

(no read)

(no read)

25-mers:

(no read)

(no read)

(no read)

(no read)

(no read)

28-mers:

(no read)

(no read)

(no read)

(no read)

(no read)



Adult female, library 3:

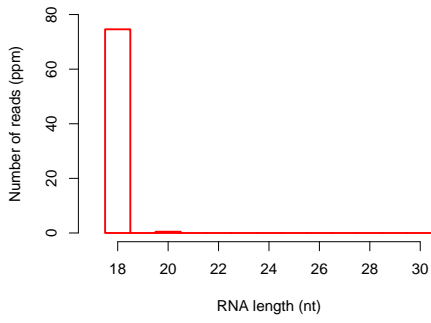

19-mers:

(no read)  
 22-mers:  
 (no read)  
 25-mers:  
 (no read)  
 28-mers:  
 (no read)

20-mers:

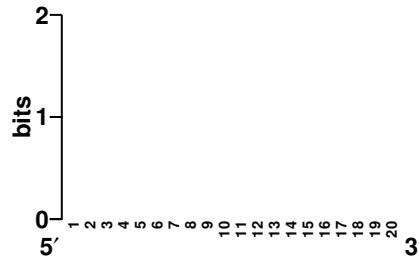

23-mers:  
 (no read)  
 26-mers:  
 (no read)  
 29-mers:  
 (no read)

18-mers:

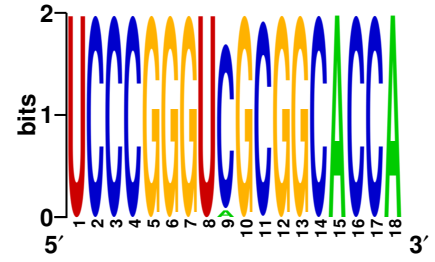

21-mers:

(no read)  
 24-mers:  
 (no read)  
 27-mers:  
 (no read)  
 30-mers:  
 (no read)

Adult male, library 3:

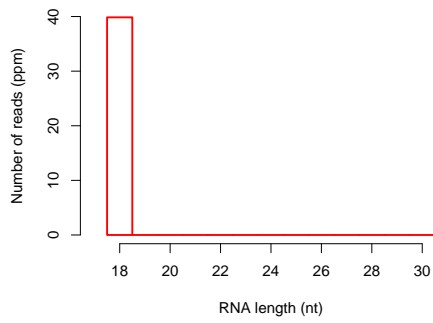

18-mers:

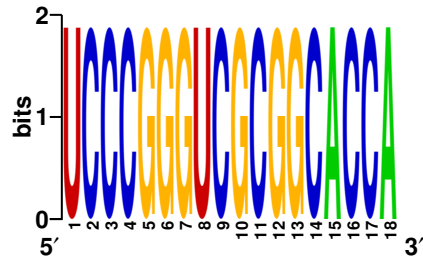

19-mers:  
(no read)  
22-mers:  
(no read)  
25-mers:  
(no read)  
28-mers:  
(no read)

20-mers:  
(no read)  
23-mers:  
(no read)  
26-mers:  
(no read)  
29-mers:  
(no read)

21-mers:  
(no read)  
24-mers:  
(no read)  
27-mers:  
(no read)  
30-mers:  
(no read)

## 11.4 Libraries #4 (3' modified, 5' hydroxyl or polyphosphorylated small RNAs)

Embryo 8h, library 4:

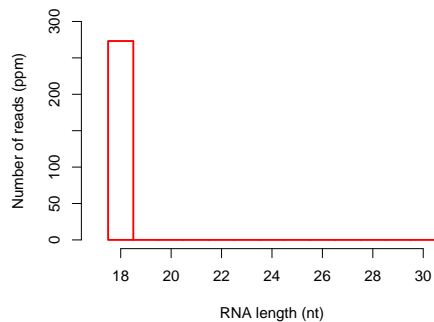

18-mers:

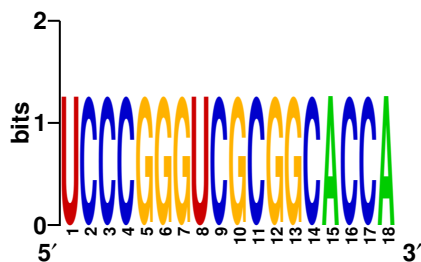

19-mers:

(no read)

22-mers:

(no read)

25-mers:

(no read)

28-mers:

(no read)

20-mers:

(no read)

23-mers:

(no read)

26-mers:

(no read)

29-mers:

(no read)

21-mers:

(no read)

24-mers:

(no read)

27-mers:

(no read)

30-mers:

(no read)

Embryo 15h, library 4:



18-mers:

|           |           |           |           |
|-----------|-----------|-----------|-----------|
| 19-mers:  | (no read) | 20-mers:  | 21-mers:  |
| (no read) |           | (no read) | (no read) |
| 22-mers:  |           | 23-mers:  | 24-mers:  |
| (no read) |           | (no read) | (no read) |
| 25-mers:  |           | 26-mers:  | 27-mers:  |
| (no read) |           | (no read) | (no read) |
| 28-mers:  |           | 29-mers:  | 30-mers:  |
| (no read) |           | (no read) | (no read) |

Embryo 36h, library 4:

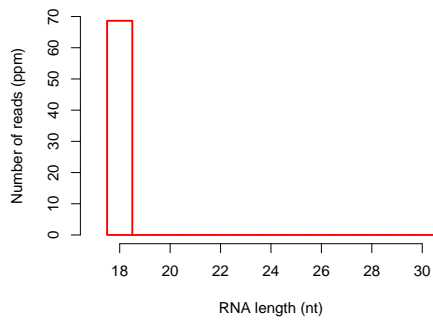

18-mers:

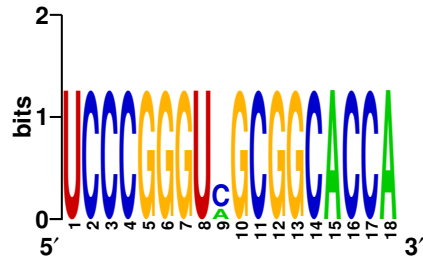

19-mers:  
(no read)  
22-mers:  
(no read)  
25-mers:  
(no read)  
28-mers:  
(no read)

20-mers:  
(no read)  
23-mers:  
(no read)  
26-mers:  
(no read)  
29-mers:  
(no read)

21-mers:  
(no read)  
24-mers:  
(no read)  
27-mers:  
(no read)  
30-mers:  
(no read)

Embryo 60h, library 4:



18-mers:

|           |           |           |           |           |           |
|-----------|-----------|-----------|-----------|-----------|-----------|
| 19-mers:  | (no read) | 20-mers:  | (no read) | 21-mers:  | (no read) |
| (no read) |           | (no read) |           | (no read) |           |
| 22-mers:  | (no read) | 23-mers:  | (no read) | 24-mers:  | (no read) |
| (no read) |           | (no read) |           | (no read) |           |
| 25-mers:  | (no read) | 26-mers:  | (no read) | 27-mers:  | (no read) |
| (no read) |           | (no read) |           | (no read) |           |
| 28-mers:  | (no read) | 29-mers:  | (no read) | 30-mers:  | (no read) |
| (no read) |           | (no read) |           | (no read) |           |

Adult female, library 4:



18-mers:

|           |           |           |           |           |           |
|-----------|-----------|-----------|-----------|-----------|-----------|
| 19-mers:  | (no read) | 20-mers:  | (no read) | 21-mers:  | (no read) |
| (no read) |           | (no read) |           | (no read) |           |
| 22-mers:  | (no read) | 23-mers:  | (no read) | 24-mers:  | (no read) |
| (no read) |           | (no read) |           | (no read) |           |
| 25-mers:  | (no read) | 26-mers:  | (no read) | 27-mers:  | (no read) |
| (no read) |           | (no read) |           | (no read) |           |
| 28-mers:  | (no read) | 29-mers:  | (no read) | 30-mers:  | (no read) |
| (no read) |           | (no read) |           | (no read) |           |

Adult male, library 4:

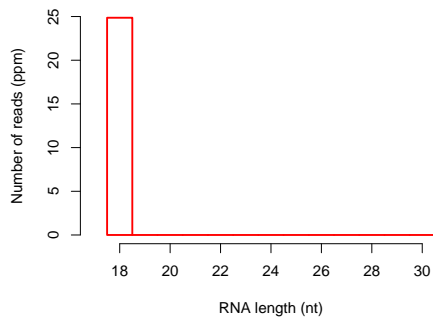

18-mers:

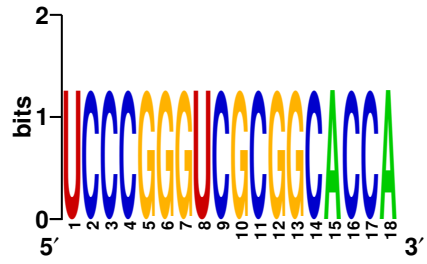

19-mers:  
(no read)  
22-mers:  
(no read)  
25-mers:  
(no read)  
28-mers:  
(no read)

20-mers:  
(no read)  
23-mers:  
(no read)  
26-mers:  
(no read)  
29-mers:  
(no read)

21-mers:  
(no read)  
24-mers:  
(no read)  
27-mers:  
(no read)  
30-mers:  
(no read)



## 12 Extragenomic and extratranscriptomic reads matching extragenomic contig #7601

### 12.1 Libraries #1 (total 5' monophosphorylated small RNAs)

Embryo 8h, library 1:

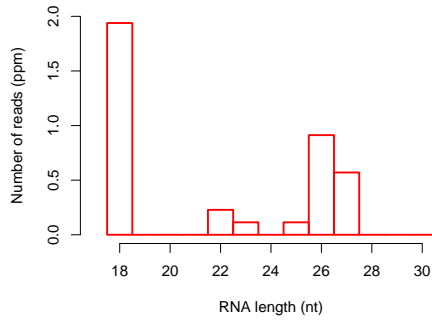

19-mers:  
(no read)  
22-mers:

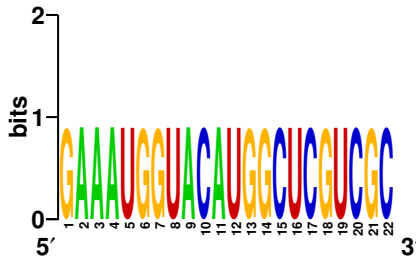

25-mers:

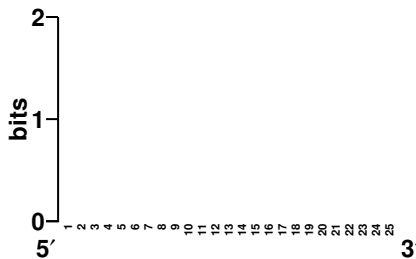

28-mers:  
(no read)

20-mers:  
(no read)  
23-mers:

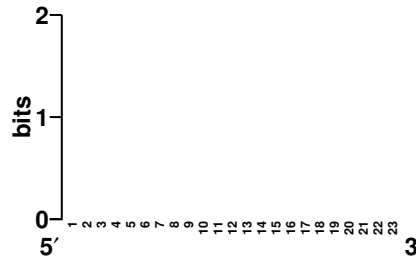

26-mers:

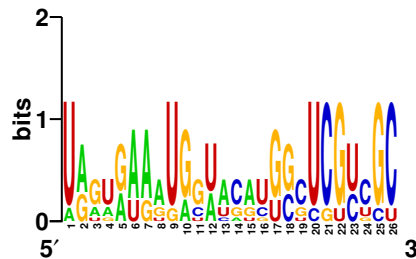

29-mers:  
(no read)

18-mers:

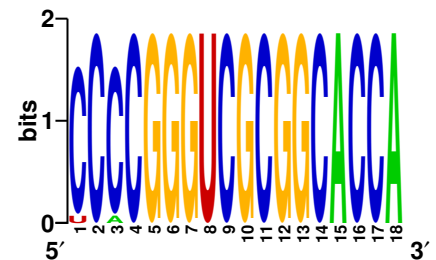

21-mers:  
(no read)  
24-mers:

(no read)  
27-mers:

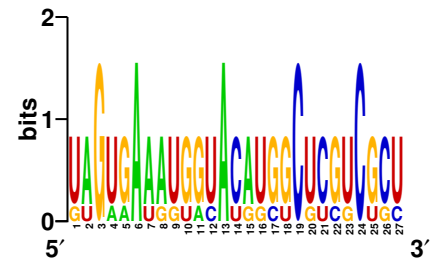

30-mers:  
(no read)

Embryo 15h, library 1:

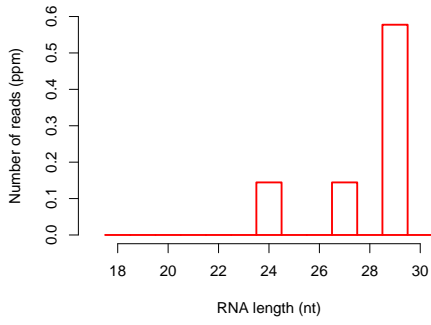

19-mers:  
(no read)  
22-mers:

20-mers:  
(no read)  
23-mers:

18-mers:

(no read)  
21-mers:  
(no read)  
24-mers:

(no read)  
25-mers:

(no read)  
26-mers:

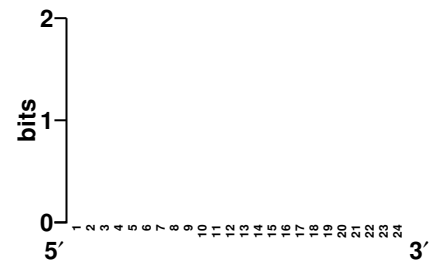

(no read)  
28-mers:

(no read)  
29-mers:

27-mers:

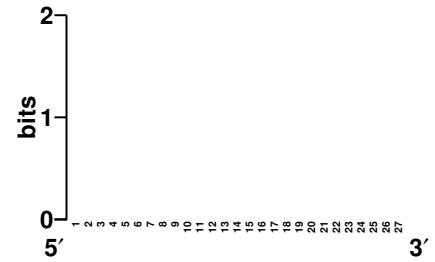

(no read)

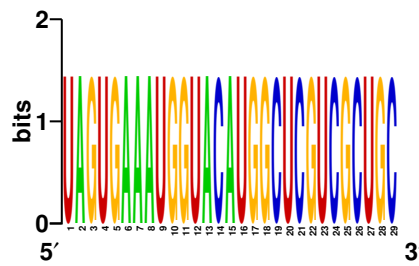

30-mers:

(no read)

Embryo 36h, library 1:

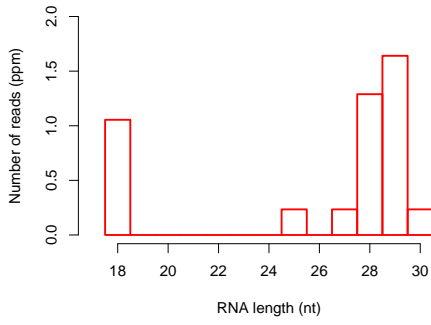

19-mers:  
(no read)  
22-mers:  
(no read)  
25-mers:

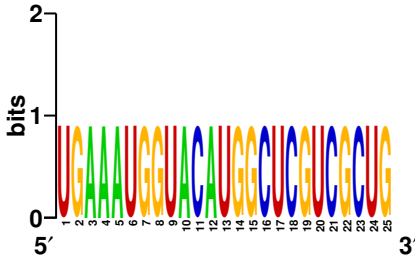

28-mers:

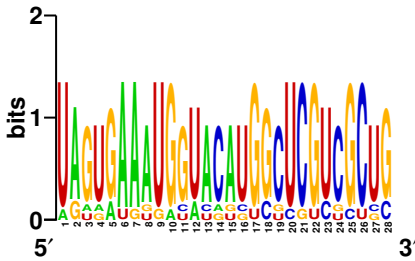

20-mers:  
(no read)  
23-mers:  
(no read)  
26-mers:

(no read)  
29-mers:

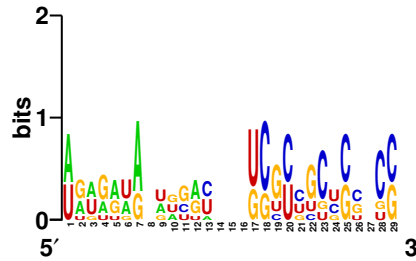

18-mers:

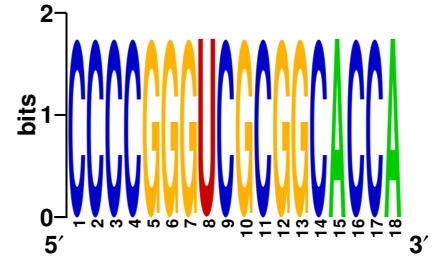

21-mers:  
(no read)  
24-mers:  
(no read)  
27-mers:

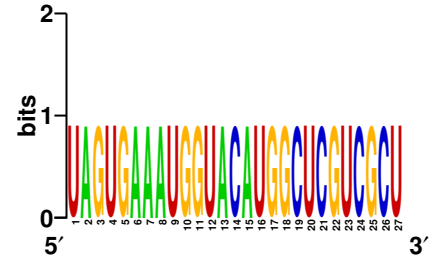

30-mers:

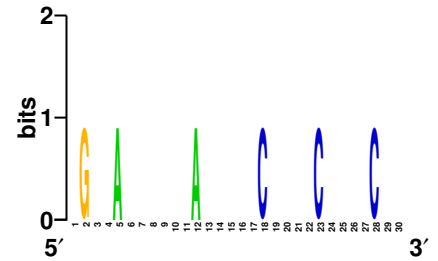

Embryo 60h, library 1:

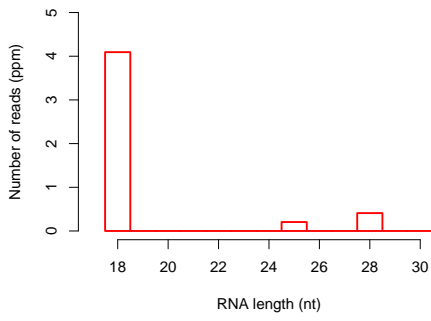

18-mers:

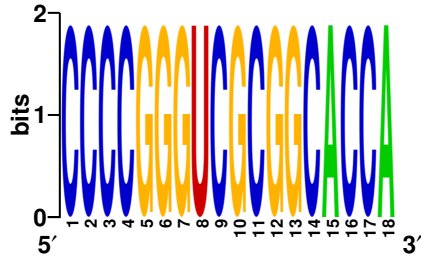

19-mers:  
(no read)  
22-mers:  
(no read)  
25-mers:

20-mers:  
(no read)  
23-mers:  
(no read)  
26-mers:

21-mers:  
(no read)  
24-mers:  
(no read)  
27-mers:

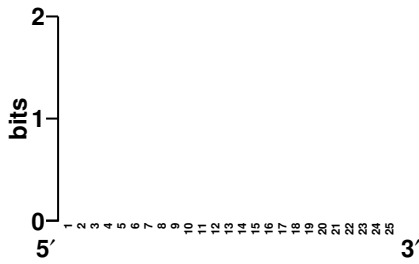

28-mers:

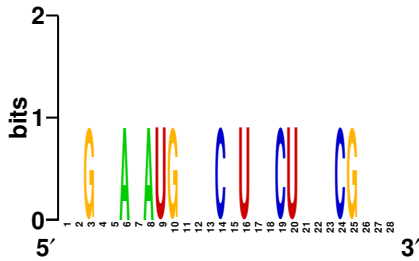

(no read)  
29-mers:

(no read)  
30-mers:

(no read)

(no read)

Adult female, library 1:



18-mers:

|           |           |           |           |           |           |
|-----------|-----------|-----------|-----------|-----------|-----------|
| 19-mers:  | (no read) | 20-mers:  | (no read) | 21-mers:  | (no read) |
| (no read) |           | (no read) |           | (no read) |           |
| 22-mers:  | (no read) | 23-mers:  | (no read) | 24-mers:  | (no read) |
| (no read) |           | (no read) |           | (no read) |           |
| 25-mers:  | (no read) | 26-mers:  | (no read) | 27-mers:  | (no read) |
| (no read) |           | (no read) |           | (no read) |           |
| 28-mers:  | (no read) | 29-mers:  | (no read) | 30-mers:  | (no read) |
| (no read) |           | (no read) |           | (no read) |           |

Adult male, library 1:

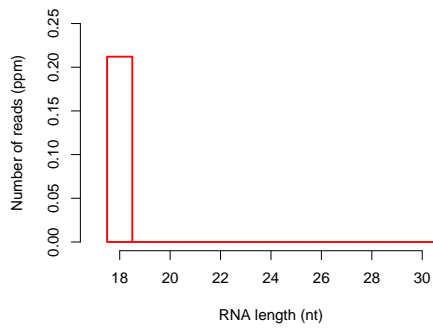

18-mers:

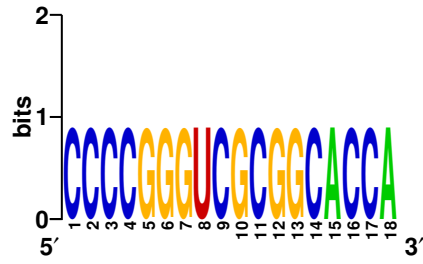

19-mers:

(no read)

22-mers:

(no read)

25-mers:

(no read)

28-mers:

(no read)

20-mers:

(no read)

23-mers:

(no read)

26-mers:

(no read)

29-mers:

(no read)

21-mers:

(no read)

24-mers:

(no read)

27-mers:

(no read)

30-mers:

(no read)

## 12.2 Libraries #2 (3' modified, 5' monophosphorylated small RNAs)

Embryo 8h, library 2:



18-mers:

(no read)

19-mers:

20-mers:

21-mers:

(no read)

(no read)

(no read)

22-mers:

23-mers:

24-mers:

(no read)

(no read)

(no read)

25-mers:

26-mers:

27-mers:

(no read)

(no read)

(no read)

28-mers:

29-mers:

30-mers:

(no read)

(no read)

(no read)

Embryo 15h, library 2:



18-mers:

|           |           |           |           |
|-----------|-----------|-----------|-----------|
| 19-mers:  | (no read) | 20-mers:  | 21-mers:  |
| (no read) |           | (no read) | (no read) |
| 22-mers:  |           | 23-mers:  | 24-mers:  |
| (no read) |           | (no read) | (no read) |
| 25-mers:  |           | 26-mers:  | 27-mers:  |
| (no read) |           | (no read) | (no read) |
| 28-mers:  |           | 29-mers:  | 30-mers:  |
| (no read) |           | (no read) | (no read) |



Embryo 36h, library 2:



18-mers:

|           |           |           |           |
|-----------|-----------|-----------|-----------|
| 19-mers:  | (no read) | 20-mers:  | 21-mers:  |
| (no read) |           | (no read) | (no read) |
| 22-mers:  |           | 23-mers:  | 24-mers:  |
| (no read) |           | (no read) | (no read) |
| 25-mers:  |           | 26-mers:  | 27-mers:  |
| (no read) |           | (no read) | (no read) |
| 28-mers:  |           | 29-mers:  | 30-mers:  |
| (no read) |           | (no read) | (no read) |

Embryo 60h, library 2:



18-mers:

|          |           |          |           |          |           |
|----------|-----------|----------|-----------|----------|-----------|
| 19-mers: | (no read) | 20-mers: | (no read) | 21-mers: | (no read) |
| 22-mers: | (no read) | 23-mers: | (no read) | 24-mers: | (no read) |
| 25-mers: | (no read) | 26-mers: | (no read) | 27-mers: | (no read) |
| 28-mers: | (no read) | 29-mers: | (no read) | 30-mers: | (no read) |

Adult female, library 2:



18-mers:

|          |           |          |           |          |           |
|----------|-----------|----------|-----------|----------|-----------|
| 19-mers: | (no read) | 20-mers: | (no read) | 21-mers: | (no read) |
| 22-mers: | (no read) | 23-mers: | (no read) | 24-mers: | (no read) |
| 25-mers: | (no read) | 26-mers: | (no read) | 27-mers: | (no read) |
| 28-mers: | (no read) | 29-mers: | (no read) | 30-mers: | (no read) |

Adult male, library 2:



18-mers:

|           |           |           |           |           |           |
|-----------|-----------|-----------|-----------|-----------|-----------|
| 19-mers:  | (no read) | 20-mers:  | (no read) | 21-mers:  | (no read) |
| (no read) |           | (no read) |           | (no read) |           |
| 22-mers:  | (no read) | 23-mers:  | (no read) | 24-mers:  | (no read) |
| (no read) |           | (no read) |           | (no read) |           |
| 25-mers:  | (no read) | 26-mers:  | (no read) | 27-mers:  | (no read) |
| (no read) |           | (no read) |           | (no read) |           |
| 28-mers:  | (no read) | 29-mers:  | (no read) | 30-mers:  | (no read) |
| (no read) |           | (no read) |           | (no read) |           |

### 12.3 Libraries #3 (total 5' hydroxyl or polyphosphorylated small RNAs)

Embryo 8h, library 3:



18-mers:

(no read)

19-mers:

20-mers:

21-mers:

(no read)

(no read)

(no read)

22-mers:

23-mers:

24-mers:

(no read)

(no read)

(no read)

25-mers:

26-mers:

27-mers:

(no read)

(no read)

(no read)

28-mers:

29-mers:

30-mers:

(no read)

(no read)

(no read)

Embryo 15h, library 3:



18-mers:

|           |           |           |           |           |           |
|-----------|-----------|-----------|-----------|-----------|-----------|
| 19-mers:  | (no read) | 20-mers:  | (no read) | 21-mers:  | (no read) |
| (no read) |           | (no read) |           | (no read) |           |
| 22-mers:  | (no read) | 23-mers:  | (no read) | 24-mers:  | (no read) |
| (no read) |           | (no read) |           | (no read) |           |
| 25-mers:  | (no read) | 26-mers:  | (no read) | 27-mers:  | (no read) |
| (no read) |           | (no read) |           | (no read) |           |
| 28-mers:  | (no read) | 29-mers:  | (no read) | 30-mers:  | (no read) |
| (no read) |           | (no read) |           | (no read) |           |

Embryo 36h, library 3:

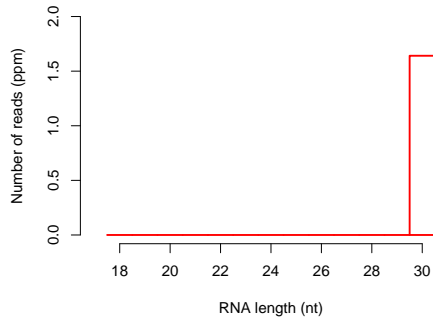

19-mers:  
(no read)  
22-mers:  
(no read)  
25-mers:  
(no read)  
28-mers:

20-mers:  
(no read)  
23-mers:  
(no read)  
26-mers:  
(no read)  
29-mers:

18-mers:

(no read)  
21-mers:  
(no read)  
24-mers:  
(no read)  
27-mers:  
(no read)  
30-mers:

(no read)

(no read)

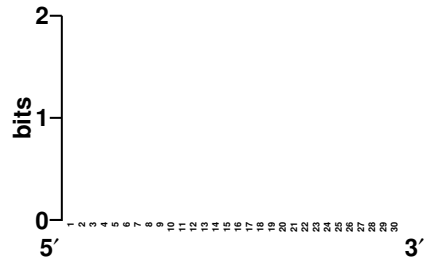

Embryo 60h, library 3:



18-mers:

|           |           |           |           |           |           |
|-----------|-----------|-----------|-----------|-----------|-----------|
| 19-mers:  | (no read) | 20-mers:  | (no read) | 21-mers:  | (no read) |
| (no read) |           | (no read) |           | (no read) |           |
| 22-mers:  | (no read) | 23-mers:  | (no read) | 24-mers:  | (no read) |
| (no read) |           | (no read) |           | (no read) |           |
| 25-mers:  | (no read) | 26-mers:  | (no read) | 27-mers:  | (no read) |
| (no read) |           | (no read) |           | (no read) |           |
| 28-mers:  | (no read) | 29-mers:  | (no read) | 30-mers:  | (no read) |
| (no read) |           | (no read) |           | (no read) |           |



Adult female, library 3:

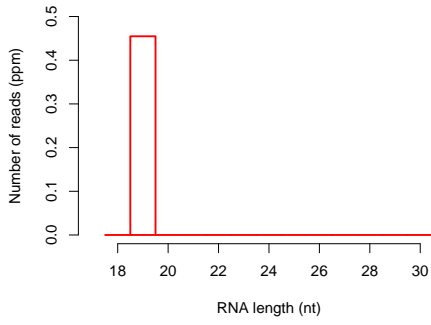

19-mers:

18-mers:

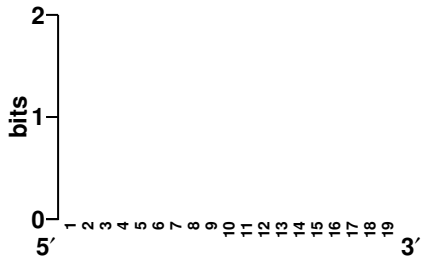

20-mers:

(no read)

21-mers:

22-mers:

(no read)

(no read)

(no read)

(no read)

(no read)

25-mers:

(no read)

(no read)

(no read)

(no read)

(no read)

28-mers:

(no read)

(no read)

(no read)

(no read)

(no read)

Adult male, library 3:



18-mers:

|          |           |          |           |          |           |
|----------|-----------|----------|-----------|----------|-----------|
| 19-mers: | (no read) | 20-mers: | (no read) | 21-mers: | (no read) |
| 22-mers: | (no read) | 23-mers: | (no read) | 24-mers: | (no read) |
| 25-mers: | (no read) | 26-mers: | (no read) | 27-mers: | (no read) |
| 28-mers: | (no read) | 29-mers: | (no read) | 30-mers: | (no read) |

## 12.4 Libraries #4 (3' modified, 5' hydroxyl or polyphosphorylated small RNAs)

Embryo 8h, library 4:



18-mers:

(no read)

19-mers:

20-mers:

21-mers:

(no read)

(no read)

(no read)

22-mers:

23-mers:

24-mers:

(no read)

(no read)

(no read)

25-mers:

26-mers:

27-mers:

(no read)

(no read)

(no read)

28-mers:

29-mers:

30-mers:

(no read)

(no read)

(no read)

Embryo 15h, library 4:



18-mers:

|           |           |           |           |
|-----------|-----------|-----------|-----------|
| 19-mers:  | (no read) | 20-mers:  | 21-mers:  |
| (no read) |           | (no read) | (no read) |
| 22-mers:  |           | 23-mers:  | 24-mers:  |
| (no read) |           | (no read) | (no read) |
| 25-mers:  |           | 26-mers:  | 27-mers:  |
| (no read) |           | (no read) | (no read) |
| 28-mers:  |           | 29-mers:  | 30-mers:  |
| (no read) |           | (no read) | (no read) |

Embryo 36h, library 4:



18-mers:

|           |           |           |           |
|-----------|-----------|-----------|-----------|
| 19-mers:  | (no read) | 20-mers:  | 21-mers:  |
| (no read) |           | (no read) | (no read) |
| 22-mers:  |           | 23-mers:  | 24-mers:  |
| (no read) |           | (no read) | (no read) |
| 25-mers:  |           | 26-mers:  | 27-mers:  |
| (no read) |           | (no read) | (no read) |
| 28-mers:  |           | 29-mers:  | 30-mers:  |
| (no read) |           | (no read) | (no read) |

Embryo 60h, library 4:



18-mers:

|          |           |          |           |          |           |
|----------|-----------|----------|-----------|----------|-----------|
| 19-mers: | (no read) | 20-mers: | (no read) | 21-mers: | (no read) |
| 22-mers: | (no read) | 23-mers: | (no read) | 24-mers: | (no read) |
| 25-mers: | (no read) | 26-mers: | (no read) | 27-mers: | (no read) |
| 28-mers: | (no read) | 29-mers: | (no read) | 30-mers: | (no read) |

Adult female, library 4:



18-mers:

|           |           |           |           |           |           |
|-----------|-----------|-----------|-----------|-----------|-----------|
| 19-mers:  | (no read) | 20-mers:  | (no read) | 21-mers:  | (no read) |
| (no read) |           | (no read) |           | (no read) |           |
| 22-mers:  | (no read) | 23-mers:  | (no read) | 24-mers:  | (no read) |
| (no read) |           | (no read) |           | (no read) |           |
| 25-mers:  | (no read) | 26-mers:  | (no read) | 27-mers:  | (no read) |
| (no read) |           | (no read) |           | (no read) |           |
| 28-mers:  | (no read) | 29-mers:  | (no read) | 30-mers:  | (no read) |
| (no read) |           | (no read) |           | (no read) |           |

Adult male, library 4:



18-mers:

|           |           |           |           |
|-----------|-----------|-----------|-----------|
| 19-mers:  | (no read) | 20-mers:  | 21-mers:  |
| (no read) |           | (no read) | (no read) |
| 22-mers:  |           | 23-mers:  | 24-mers:  |
| (no read) |           | (no read) | (no read) |
| 25-mers:  |           | 26-mers:  | 27-mers:  |
| (no read) |           | (no read) | (no read) |
| 28-mers:  |           | 29-mers:  | 30-mers:  |
| (no read) |           | (no read) | (no read) |



# 13 Extragenomic and extratranscriptomic reads matching extragenomic contig #38312

## 13.1 Libraries #1 (total 5' monophosphorylated small RNAs)

Embryo 8h, library 1:

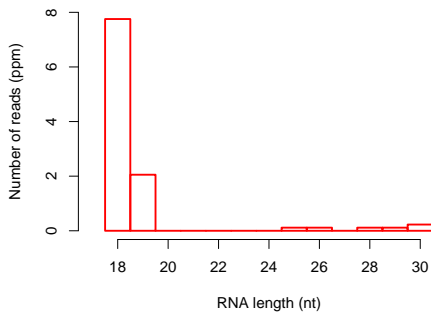

19-mers:

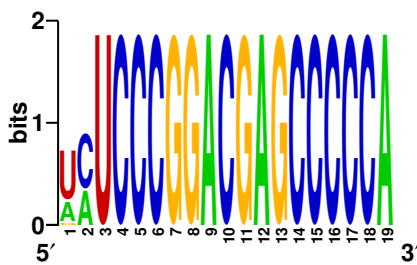

22-mers:  
(no read)  
25-mers:

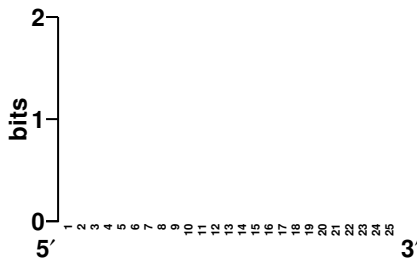

28-mers:

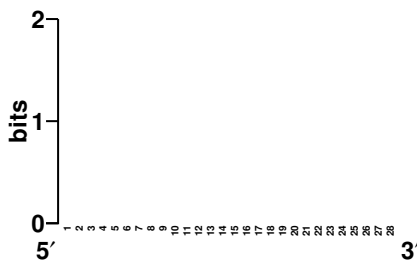

20-mers:

(no read)  
23-mers:  
(no read)  
26-mers:

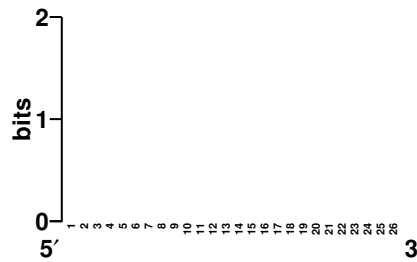

29-mers:

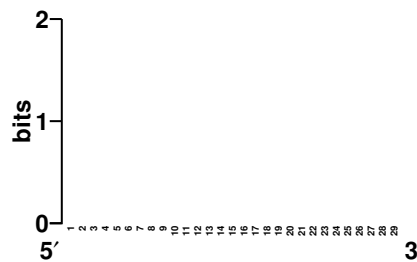

18-mers:

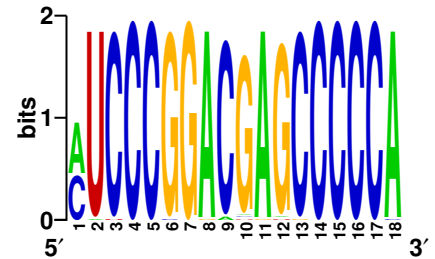

21-mers:

(no read)  
24-mers:  
(no read)  
27-mers:

(no read)  
30-mers:

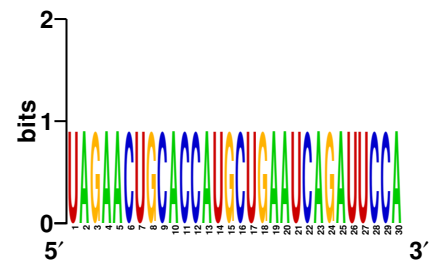

Embryo 15h, library 1:

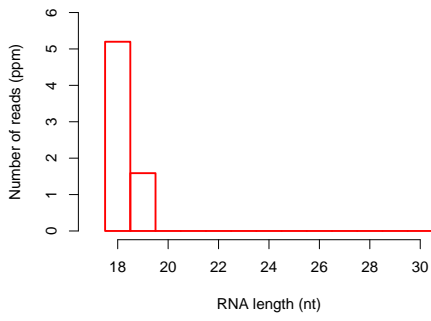

18-mers:

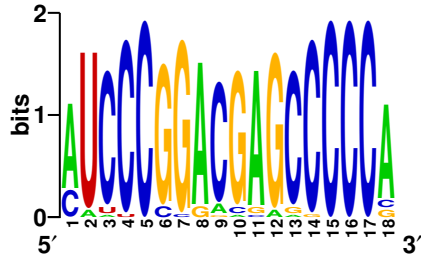

19-mers:

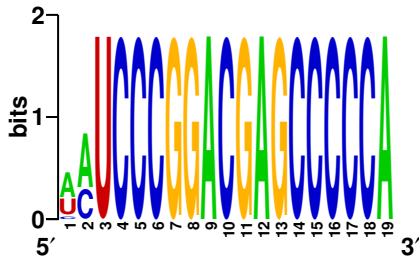

20-mers:

(no read)  
 23-mers:  
 (no read)  
 (no read)  
 26-mers:  
 (no read)  
 (no read)  
 29-mers:  
 (no read)

21-mers:

(no read)  
 24-mers:  
 (no read)  
 (no read)  
 27-mers:  
 (no read)  
 (no read)  
 30-mers:  
 (no read)

22-mers:  
 (no read)  
 (no read)  
 25-mers:  
 (no read)  
 (no read)  
 28-mers:  
 (no read)

Embryo 36h, library 1:

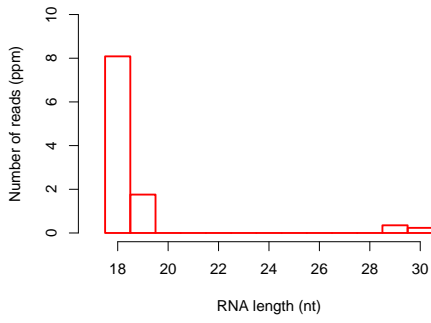

19-mers:

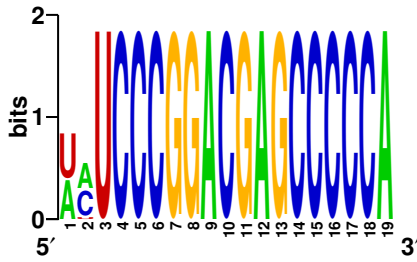

- 22-mers:
- (no read)
- 25-mers:
- (no read)
- 28-mers:

(no read)

20-mers:

- (no read)
- 23-mers:
- (no read)
- 26-mers:
- (no read)
- 29-mers:

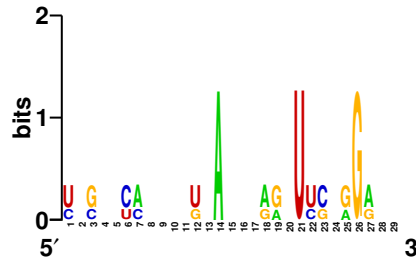

18-mers:

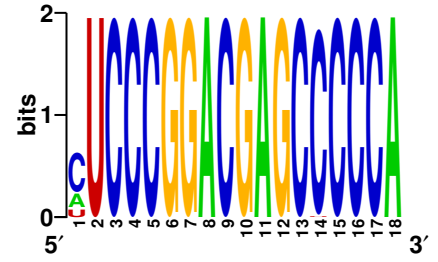

21-mers:

- (no read)
- 24-mers:
- (no read)
- 27-mers:
- (no read)
- 30-mers:

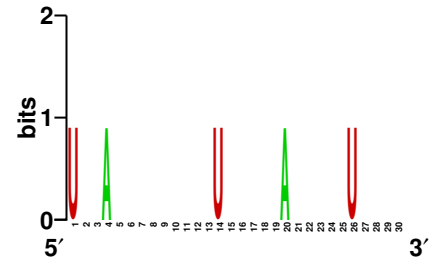



Adult female, library 1:

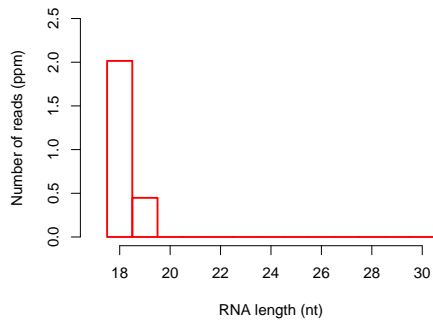

18-mers:

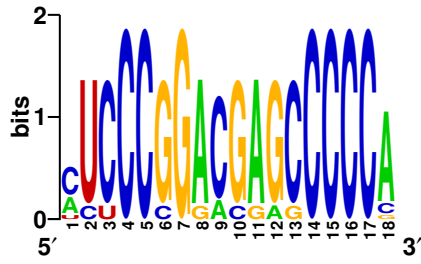

19-mers:

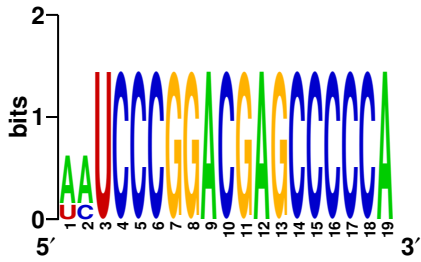

20-mers:

(no read)

21-mers:

(no read)

22-mers:

(no read)

25-mers:

(no read)

28-mers:

(no read)

23-mers:

(no read)

26-mers:

(no read)

29-mers:

(no read)

24-mers:

(no read)

27-mers:

(no read)

30-mers:

(no read)

Adult male, library 1:

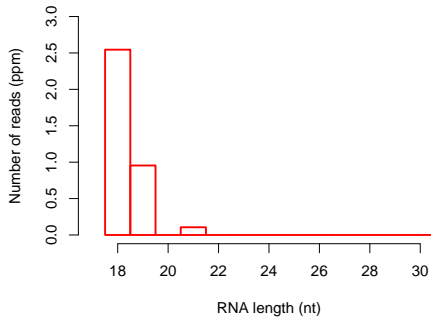

18-mers:

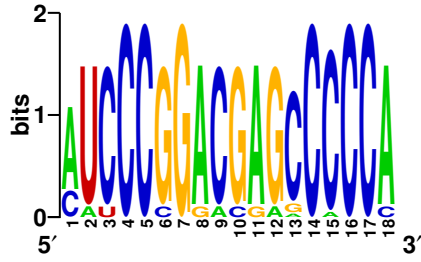

19-mers:

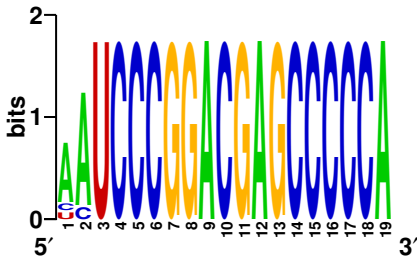

20-mers:

(no read)  
 23-mers:  
 (no read)  
 26-mers:  
 (no read)  
 29-mers:  
 (no read)

21-mers:

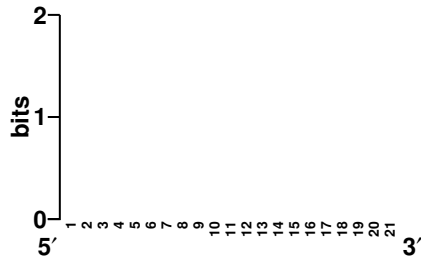

22-mers:  
 (no read)  
 25-mers:  
 (no read)  
 28-mers:  
 (no read)

24-mers:  
 (no read)  
 27-mers:  
 (no read)  
 30-mers:  
 (no read)

## 13.2 Libraries #2 (3' modified, 5' monophosphorylated small RNAs)

Embryo 8h, library 2:



18-mers:

(no read)

19-mers:

20-mers:

21-mers:

(no read)

(no read)

(no read)

22-mers:

23-mers:

24-mers:

(no read)

(no read)

(no read)

25-mers:

26-mers:

27-mers:

(no read)

(no read)

(no read)

28-mers:

29-mers:

30-mers:

(no read)

(no read)

(no read)





Embryo 36h, library 2:

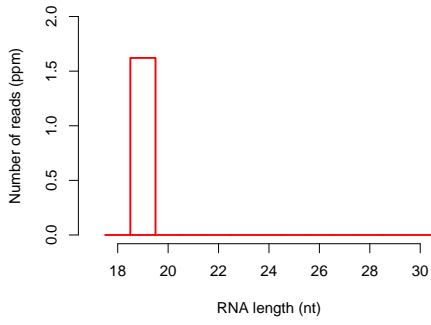

18-mers:

19-mers:

20-mers:

(no read)

21-mers:



(no read)

(no read)

22-mers:

(no read)

(no read)

(no read)

(no read)

(no read)

25-mers:

(no read)

(no read)

(no read)

(no read)

(no read)

28-mers:

(no read)

(no read)

(no read)

(no read)

(no read)

Embryo 60h, library 2:



18-mers:

|           |           |           |           |
|-----------|-----------|-----------|-----------|
| 19-mers:  | (no read) | 20-mers:  | 21-mers:  |
| (no read) |           | (no read) | (no read) |
| 22-mers:  |           | 23-mers:  | 24-mers:  |
| (no read) |           | (no read) | (no read) |
| 25-mers:  |           | 26-mers:  | 27-mers:  |
| (no read) |           | (no read) | (no read) |
| 28-mers:  |           | 29-mers:  | 30-mers:  |
| (no read) |           | (no read) | (no read) |

Adult female, library 2:

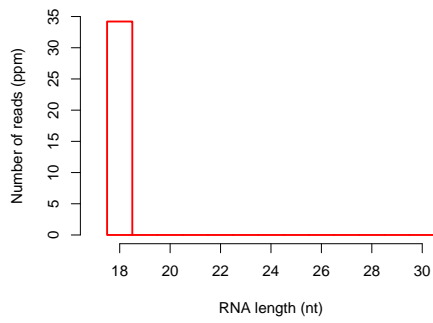

18-mers:

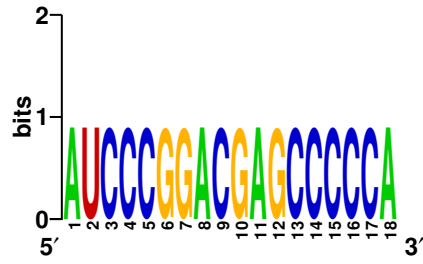

19-mers:

(no read)

22-mers:

(no read)

25-mers:

(no read)

28-mers:

(no read)

20-mers:

(no read)

23-mers:

(no read)

26-mers:

(no read)

29-mers:

(no read)

21-mers:

(no read)

24-mers:

(no read)

27-mers:

(no read)

30-mers:

(no read)

Adult male, library 2:

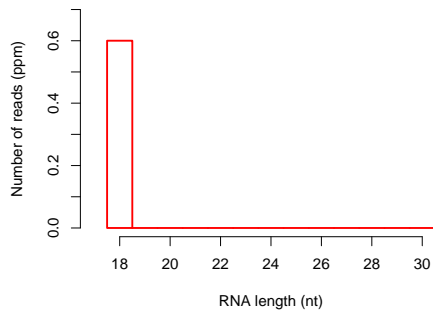

18-mers:

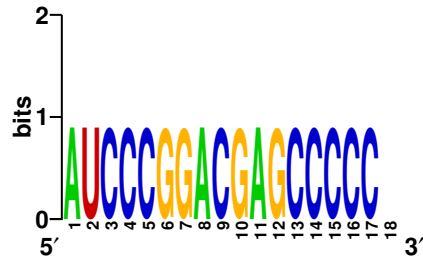

19-mers:  
(no read)  
22-mers:  
(no read)  
25-mers:  
(no read)  
28-mers:  
(no read)

20-mers:  
(no read)  
23-mers:  
(no read)  
26-mers:  
(no read)  
29-mers:  
(no read)

21-mers:  
(no read)  
24-mers:  
(no read)  
27-mers:  
(no read)  
30-mers:  
(no read)

### 13.3 Libraries #3 (total 5' hydroxyl or polyphosphorylated small RNAs)

Embryo 8h, library 3:

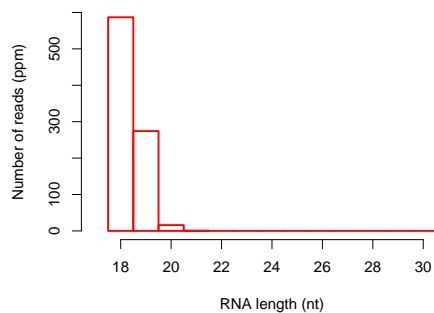

18-mers:

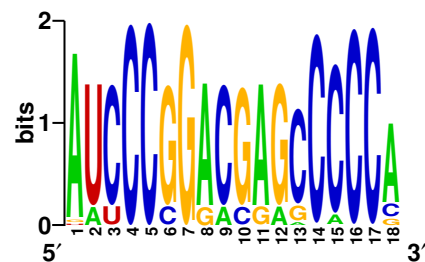

19-mers:

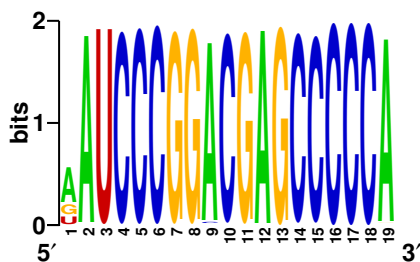

20-mers:

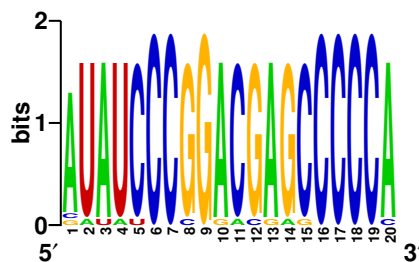

21-mers:

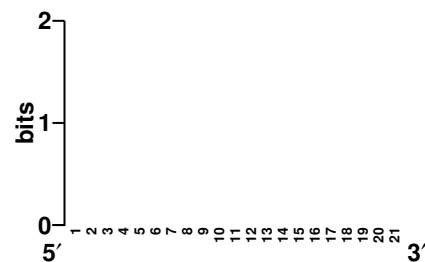

22-mers:

(no read)

23-mers:

(no read)

24-mers:

(no read)

25-mers:

(no read)

26-mers:

(no read)

27-mers:

(no read)

28-mers:

(no read)

29-mers:

(no read)

30-mers:

(no read)

Embryo 15h, library 3:

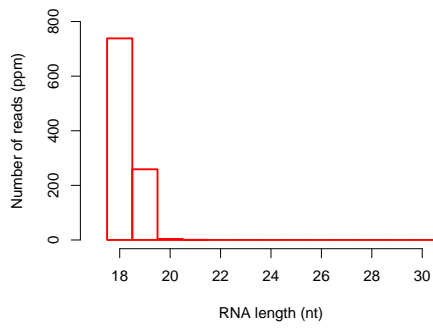

19-mers:

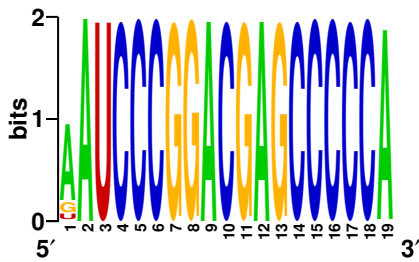

20-mers:

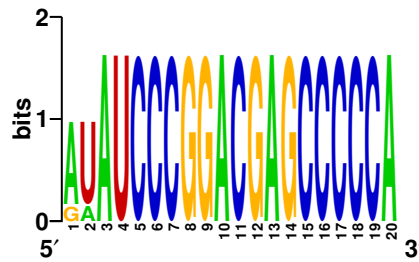

18-mers:

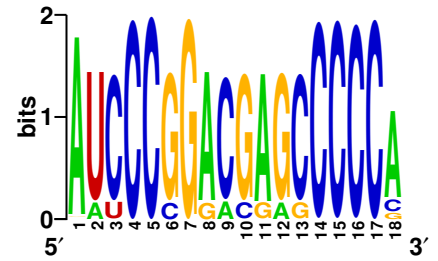

21-mers:

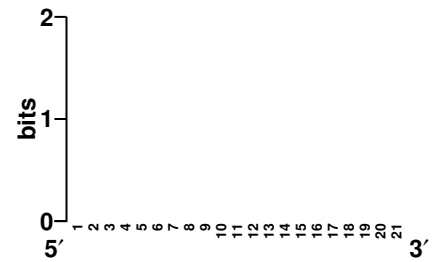

22-mers:

(no read)

25-mers:

(no read)

28-mers:

(no read)

23-mers:

(no read)

26-mers:

(no read)

29-mers:

(no read)

24-mers:

(no read)

27-mers:

(no read)

30-mers:

(no read)



Embryo 60h, library 3:

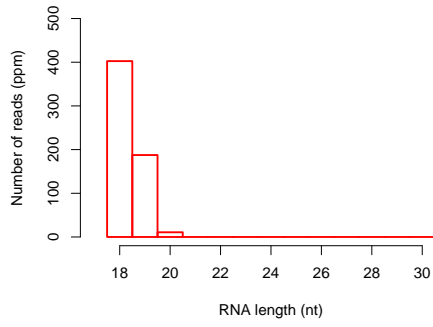

19-mers:

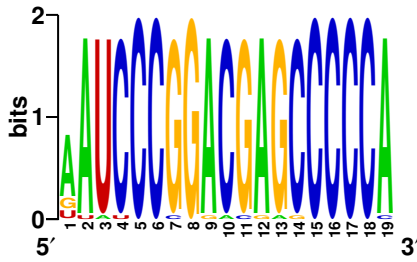

20-mers:

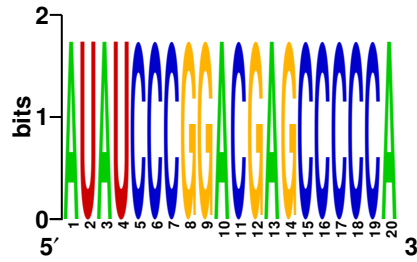

22-mers:  
(no read)  
25-mers:  
(no read)  
28-mers:  
(no read)

23-mers:  
(no read)  
26-mers:  
(no read)  
29-mers:  
(no read)

18-mers:

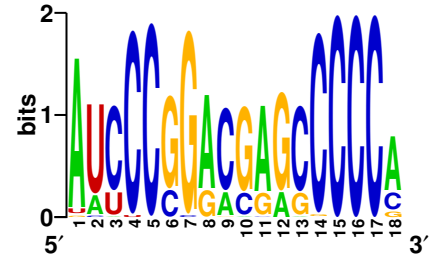

21-mers:

(no read)  
24-mers:  
(no read)  
27-mers:  
(no read)  
30-mers:  
(no read)



Adult female, library 3:

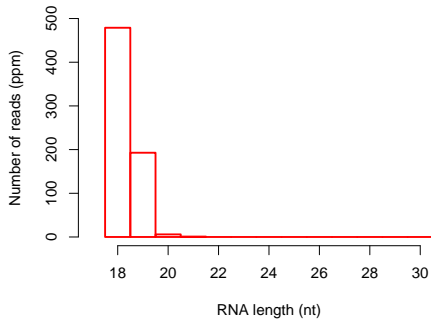

19-mers:

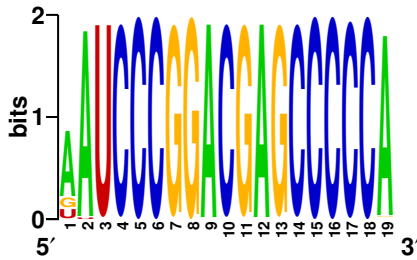

20-mers:

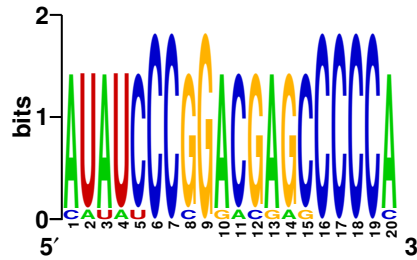

18-mers:

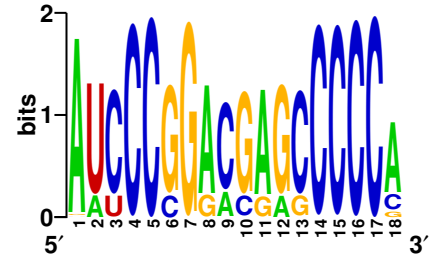

21-mers:

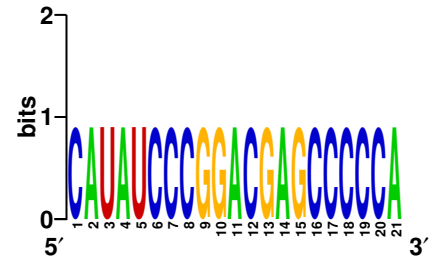

22-mers:  
(no read)  
25-mers:  
(no read)  
28-mers:  
(no read)

23-mers:  
(no read)  
26-mers:  
(no read)  
29-mers:  
(no read)

24-mers:  
(no read)  
27-mers:  
(no read)  
30-mers:  
(no read)

Adult male, library 3:

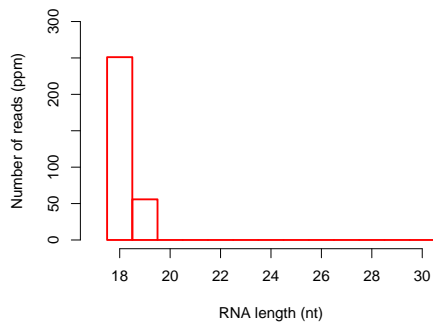

18-mers:

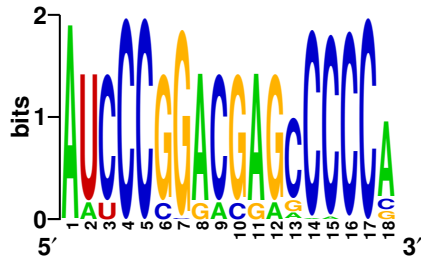

19-mers:

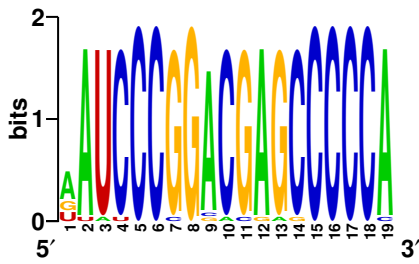

20-mers:

(no read)

21-mers:

(no read)

22-mers:

(no read)

23-mers:

(no read)

24-mers:

(no read)

25-mers:

(no read)

26-mers:

(no read)

27-mers:

(no read)

28-mers:

(no read)

29-mers:

(no read)

30-mers:

(no read)

### 13.4 Libraries #4 (3' modified, 5' hydroxyl or polyphosphorylated small RNAs)

Embryo 8h, library 4:



18-mers:

|           |           |           |           |           |           |
|-----------|-----------|-----------|-----------|-----------|-----------|
| 19-mers:  | (no read) | 20-mers:  | (no read) | 21-mers:  | (no read) |
| (no read) |           | (no read) |           | (no read) |           |
| 22-mers:  | (no read) | 23-mers:  | (no read) | 24-mers:  | (no read) |
| (no read) |           | (no read) |           | (no read) |           |
| 25-mers:  | (no read) | 26-mers:  | (no read) | 27-mers:  | (no read) |
| (no read) |           | (no read) |           | (no read) |           |
| 28-mers:  | (no read) | 29-mers:  | (no read) | 30-mers:  | (no read) |
| (no read) |           | (no read) |           | (no read) |           |

Embryo 15h, library 4:

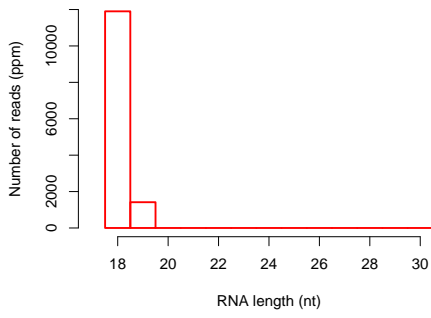

18-mers:

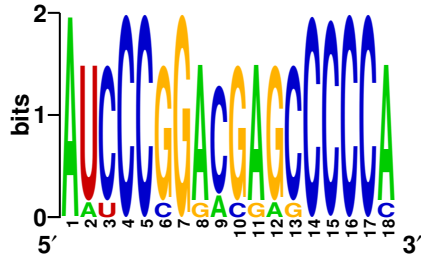

19-mers:

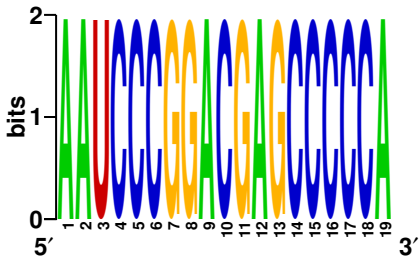

20-mers:

(no read)  
 23-mers:  
 (no read)  
 26-mers:  
 (no read)  
 29-mers:  
 (no read)

21-mers:

(no read)  
 24-mers:  
 (no read)  
 27-mers:  
 (no read)  
 30-mers:  
 (no read)

22-mers:  
 (no read)  
 25-mers:  
 (no read)  
 28-mers:  
 (no read)

Embryo 36h, library 4:

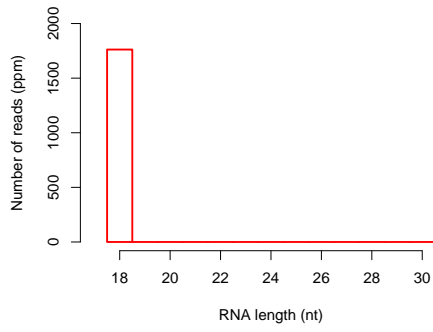

18-mers:

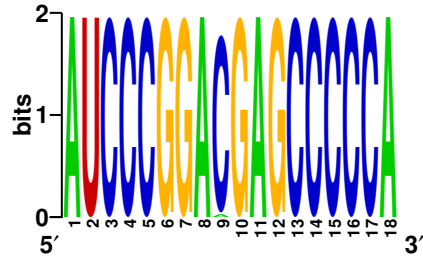

19-mers:  
(no read)  
22-mers:  
(no read)  
25-mers:  
(no read)  
28-mers:  
(no read)

20-mers:  
(no read)  
23-mers:  
(no read)  
26-mers:  
(no read)  
29-mers:  
(no read)

21-mers:  
(no read)  
24-mers:  
(no read)  
27-mers:  
(no read)  
30-mers:  
(no read)

Embryo 60h, library 4:



18-mers:

|           |           |           |           |           |           |
|-----------|-----------|-----------|-----------|-----------|-----------|
| 19-mers:  | (no read) | 20-mers:  | (no read) | 21-mers:  | (no read) |
| (no read) |           | (no read) |           | (no read) |           |
| 22-mers:  | (no read) | 23-mers:  | (no read) | 24-mers:  | (no read) |
| (no read) |           | (no read) |           | (no read) |           |
| 25-mers:  | (no read) | 26-mers:  | (no read) | 27-mers:  | (no read) |
| (no read) |           | (no read) |           | (no read) |           |
| 28-mers:  | (no read) | 29-mers:  | (no read) | 30-mers:  | (no read) |
| (no read) |           | (no read) |           | (no read) |           |

Adult female, library 4:

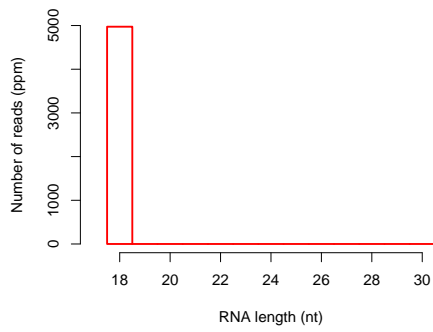

18-mers:

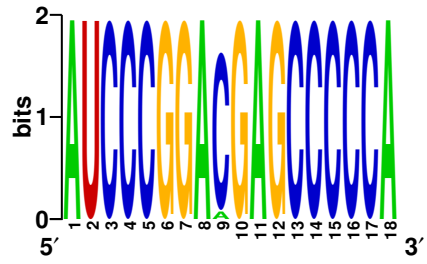

19-mers:  
(no read)  
22-mers:  
(no read)  
25-mers:  
(no read)  
28-mers:  
(no read)

20-mers:  
(no read)  
23-mers:  
(no read)  
26-mers:  
(no read)  
29-mers:  
(no read)

21-mers:  
(no read)  
24-mers:  
(no read)  
27-mers:  
(no read)  
30-mers:  
(no read)

Adult male, library 4:

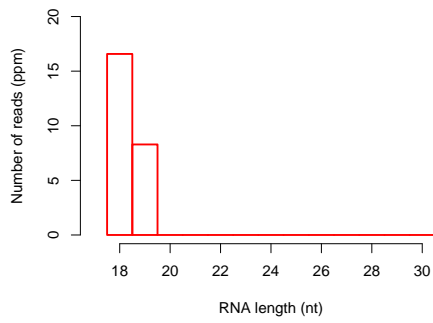

18-mers:

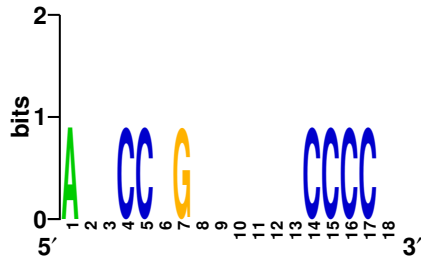

19-mers:



20-mers:

(no read)  
 23-mers: (no read)  
 26-mers: (no read)  
 29-mers: (no read)

21-mers:

(no read)  
 24-mers: (no read)  
 27-mers: (no read)  
 30-mers: (no read)

22-mers: (no read)  
 25-mers: (no read)  
 28-mers: (no read)



# 14 Extragenomic and extratranscriptomic reads matching extragenomic contig #3365

## 14.1 Libraries #1 (total 5' monophosphorylated small RNAs)

Embryo 8h, library 1:

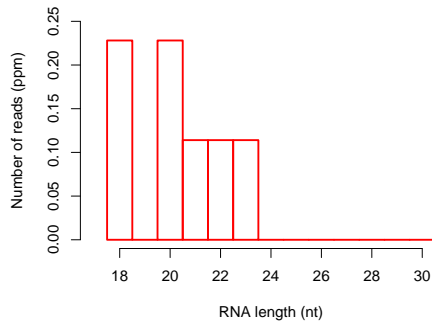

19-mers:

(no read)

22-mers:

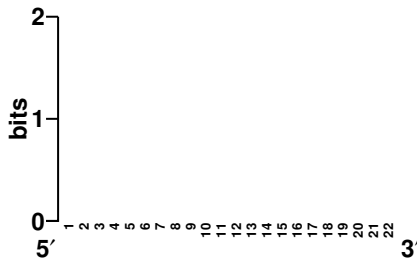

25-mers:

(no read)

28-mers:

(no read)

18-mers:

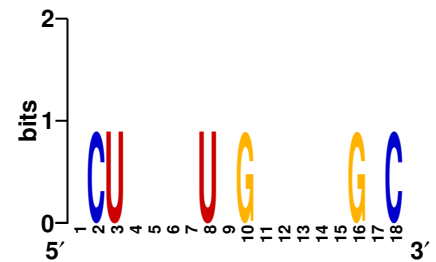

20-mers:

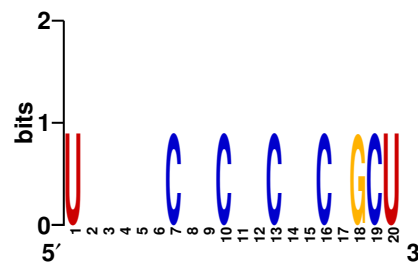

23-mers:

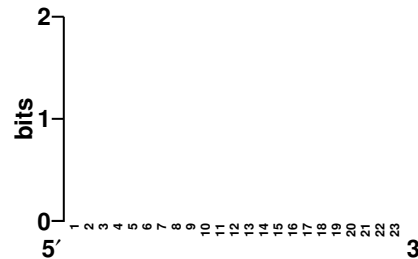

26-mers:

(no read)

29-mers:

(no read)

21-mers:

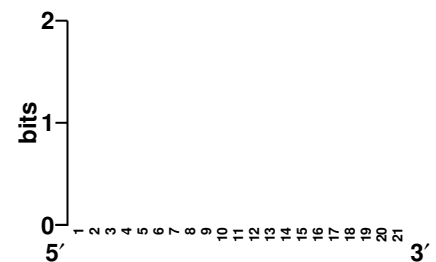

24-mers:

(no read)

27-mers:

(no read)

30-mers:

(no read)

Embryo 15h, library 1:

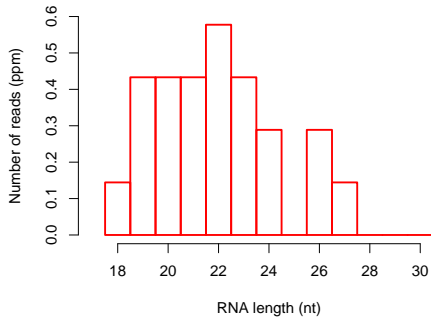

19-mers:

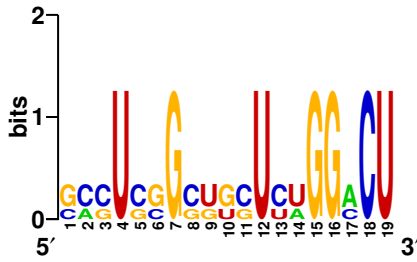

20-mers:

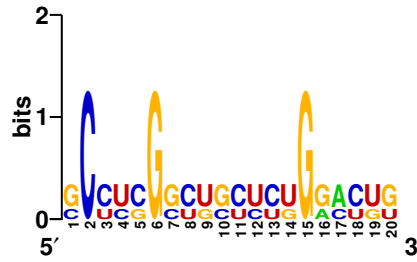

18-mers:

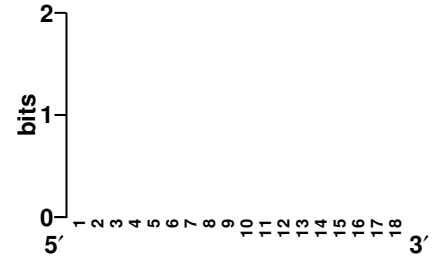

21-mers:

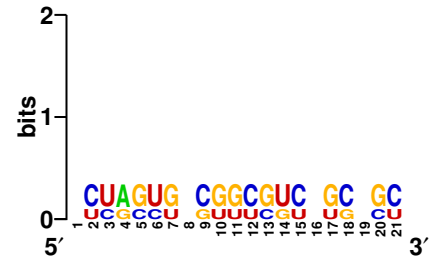

22-mers:

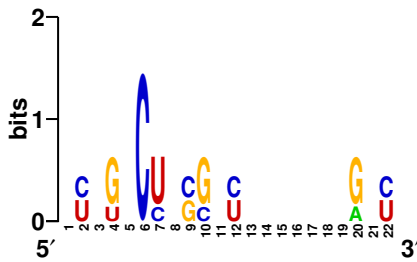

23-mers:

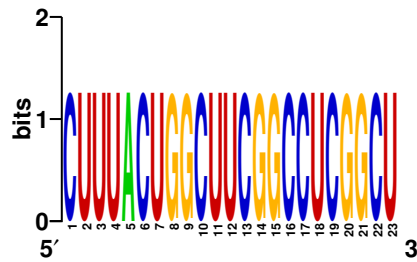

24-mers:

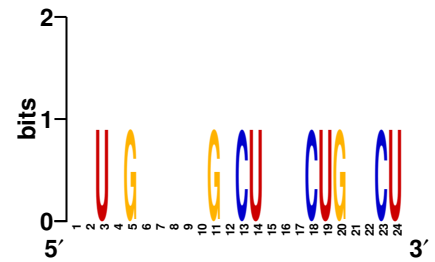

25-mers:

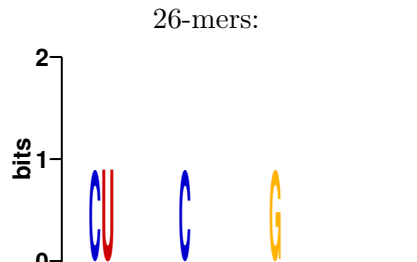

27-mers:



(no read)

28-mers:

(no read)

29-mers:

(no read)

30-mers:

(no read)





Adult female, library 1:

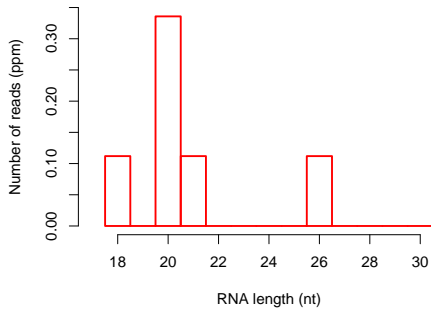

19-mers:

(no read)  
22-mers:  
(no read)  
25-mers:

(no read)  
28-mers:  
(no read)

18-mers:

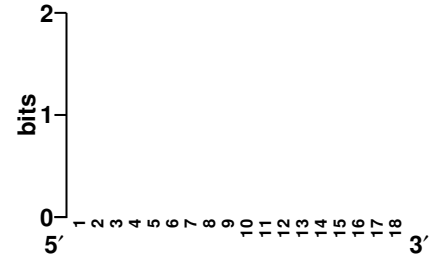

21-mers:



24-mers:  
(no read)  
27-mers:

(no read)  
30-mers:  
(no read)

20-mers:

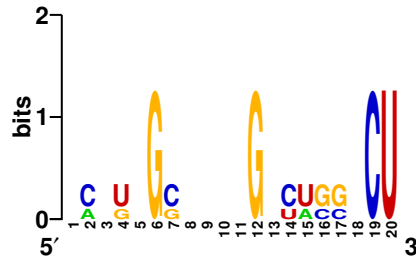

23-mers:  
(no read)  
26-mers:

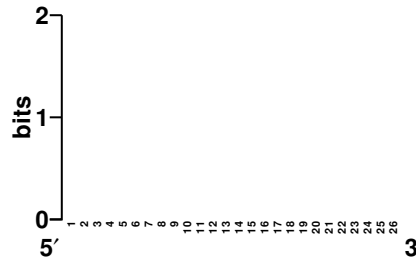

29-mers:  
(no read)

Adult male, library 1:

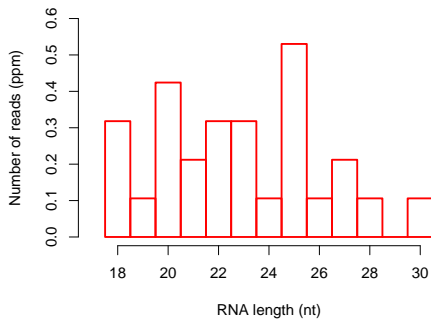

19-mers:



20-mers:

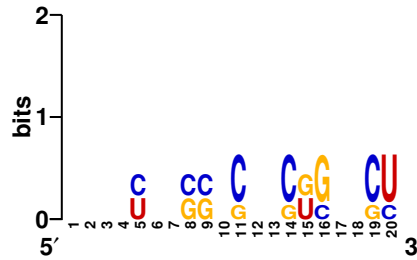

18-mers:

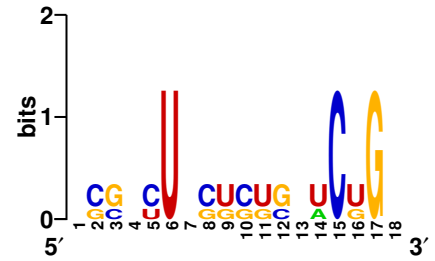

21-mers:

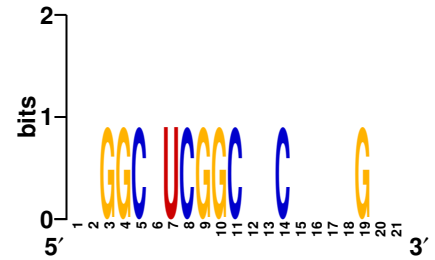

22-mers:

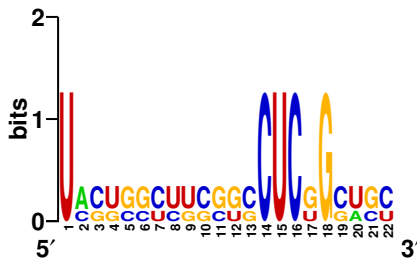

23-mers:

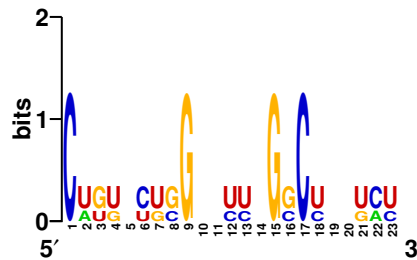

24-mers:



25-mers:

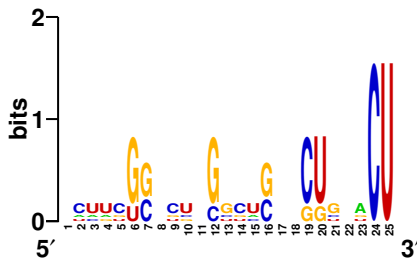

26-mers:

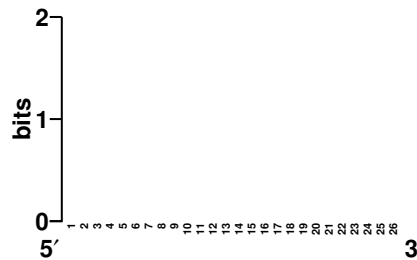

27-mers:

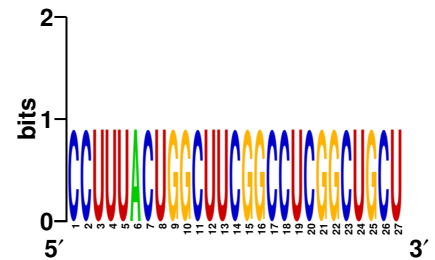

28-mers:



29-mers:

(no read)

30-mers:

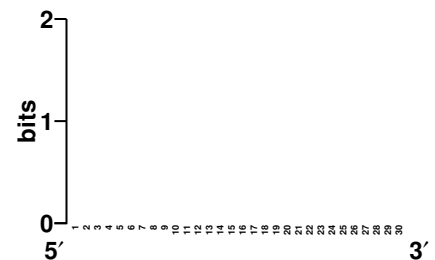

## 14.2 Libraries #2 (3' modified, 5' monophosphorylated small RNAs)

Embryo 8h, library 2:



18-mers:

(no read)

19-mers:

20-mers:

21-mers:

(no read)

(no read)

(no read)

22-mers:

23-mers:

24-mers:

(no read)

(no read)

(no read)

25-mers:

26-mers:

27-mers:

(no read)

(no read)

(no read)

28-mers:

29-mers:

30-mers:

(no read)

(no read)

(no read)

Embryo 15h, library 2:

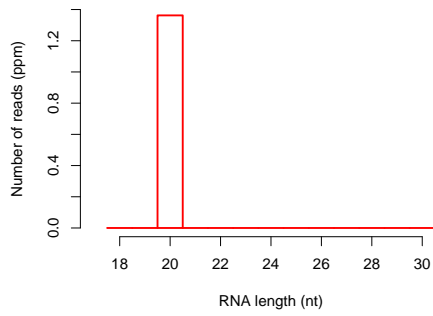

19-mers:

20-mers:

18-mers:

(no read)

21-mers:

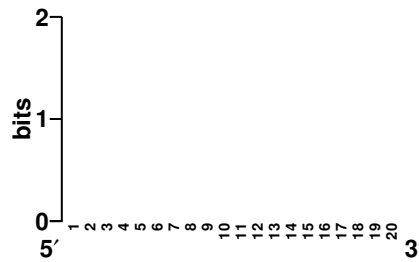

(no read)

22-mers:

23-mers:

(no read)

24-mers:

(no read)

(no read)

(no read)

25-mers:

26-mers:

27-mers:

(no read)

(no read)

(no read)

28-mers:

29-mers:

30-mers:

(no read)

(no read)

(no read)



Embryo 36h, library 2:



18-mers:

|           |           |           |           |           |           |
|-----------|-----------|-----------|-----------|-----------|-----------|
| 19-mers:  | (no read) | 20-mers:  | (no read) | 21-mers:  | (no read) |
| (no read) |           | (no read) |           | (no read) |           |
| 22-mers:  | (no read) | 23-mers:  | (no read) | 24-mers:  | (no read) |
| (no read) |           | (no read) |           | (no read) |           |
| 25-mers:  | (no read) | 26-mers:  | (no read) | 27-mers:  | (no read) |
| (no read) |           | (no read) |           | (no read) |           |
| 28-mers:  | (no read) | 29-mers:  | (no read) | 30-mers:  | (no read) |
| (no read) |           | (no read) |           | (no read) |           |

Embryo 60h, library 2:

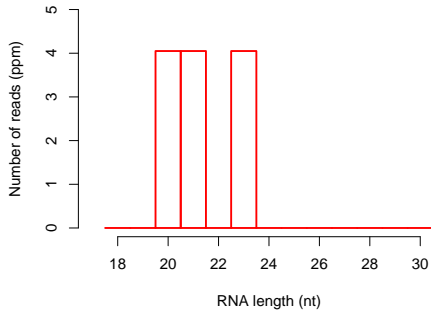

19-mers:

(no read)  
22-mers:

(no read)  
25-mers:  
(no read)  
28-mers:  
(no read)

20-mers:

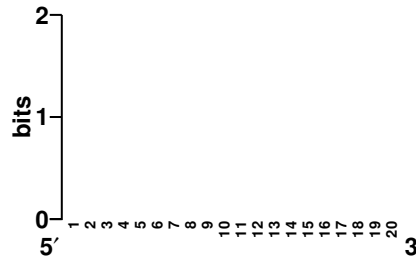

23-mers:

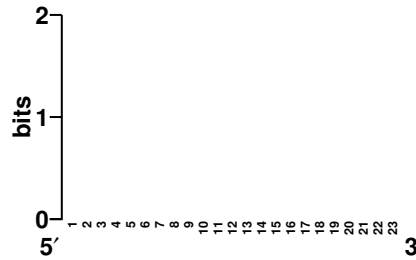

26-mers:

(no read)  
29-mers:  
(no read)

18-mers:

(no read)  
21-mers:

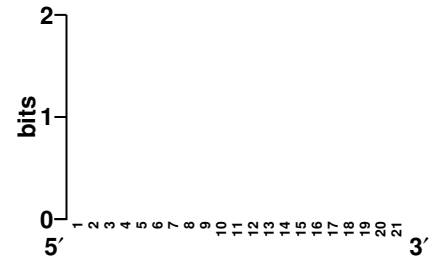

24-mers:

(no read)  
27-mers:  
(no read)  
30-mers:  
(no read)

Adult female, library 2:



18-mers:

|           |           |           |           |           |           |
|-----------|-----------|-----------|-----------|-----------|-----------|
| 19-mers:  | (no read) | 20-mers:  | (no read) | 21-mers:  | (no read) |
| (no read) |           | (no read) |           | (no read) |           |
| 22-mers:  | (no read) | 23-mers:  | (no read) | 24-mers:  | (no read) |
| (no read) |           | (no read) |           | (no read) |           |
| 25-mers:  | (no read) | 26-mers:  | (no read) | 27-mers:  | (no read) |
| (no read) |           | (no read) |           | (no read) |           |
| 28-mers:  | (no read) | 29-mers:  | (no read) | 30-mers:  | (no read) |
| (no read) |           | (no read) |           | (no read) |           |

Adult male, library 2:



18-mers:

|           |           |           |           |           |           |
|-----------|-----------|-----------|-----------|-----------|-----------|
| 19-mers:  | (no read) | 20-mers:  | (no read) | 21-mers:  | (no read) |
| (no read) |           | (no read) |           | (no read) |           |
| 22-mers:  | (no read) | 23-mers:  | (no read) | 24-mers:  | (no read) |
| (no read) |           | (no read) |           | (no read) |           |
| 25-mers:  | (no read) | 26-mers:  | (no read) | 27-mers:  | (no read) |
| (no read) |           | (no read) |           | (no read) |           |
| 28-mers:  | (no read) | 29-mers:  | (no read) | 30-mers:  | (no read) |
| (no read) |           | (no read) |           | (no read) |           |

### 14.3 Libraries #3 (total 5' hydroxyl or polyphosphorylated small RNAs)

Embryo 8h, library 3:

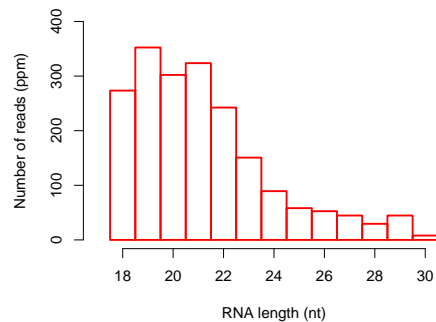

18-mers:

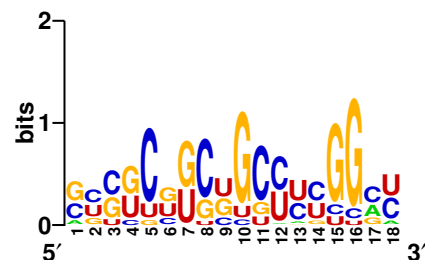

19-mers:

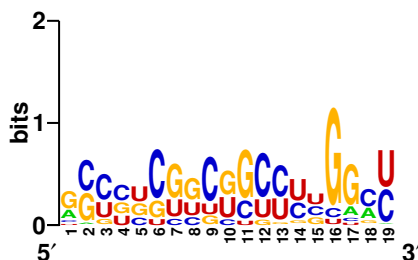

20-mers:

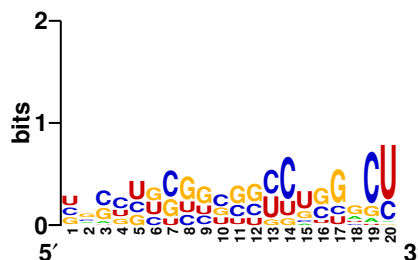

21-mers:

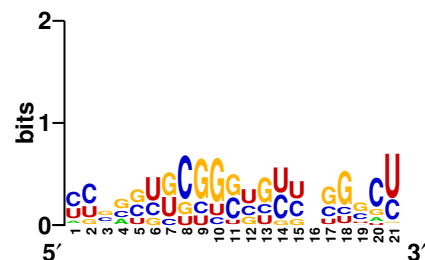

22-mers:

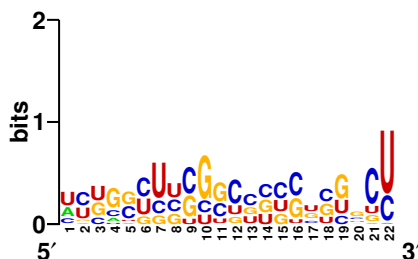

23-mers:

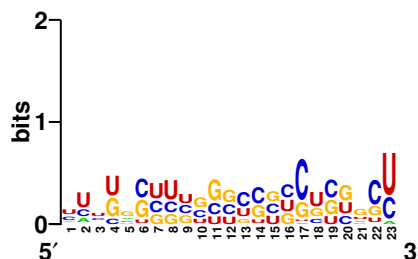

24-mers:

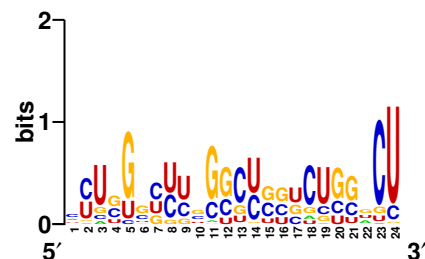

25-mers:

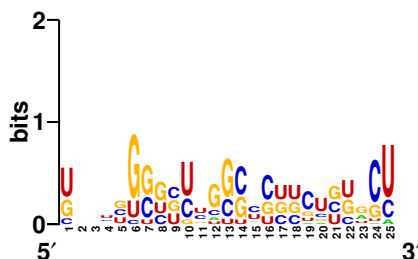

26-mers:

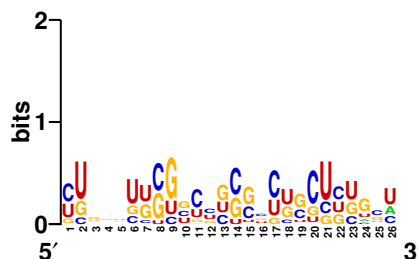

27-mers:

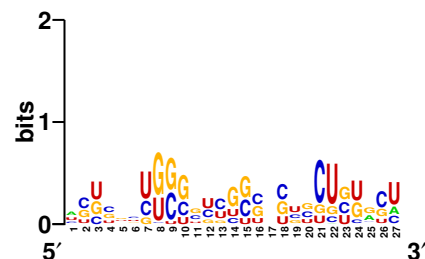

28-mers:

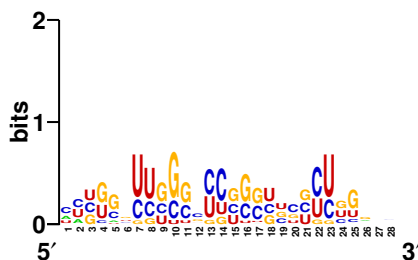

29-mers:

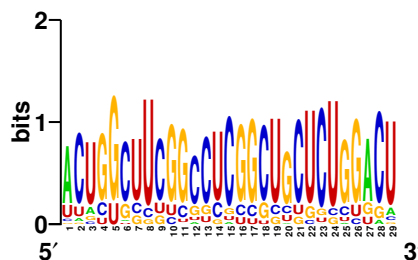

30-mers:

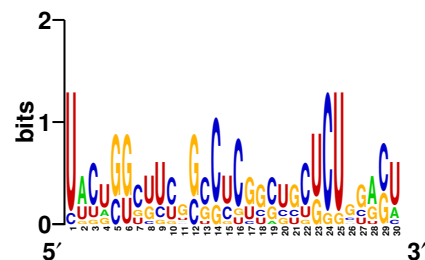

Embryo 15h, library 3:

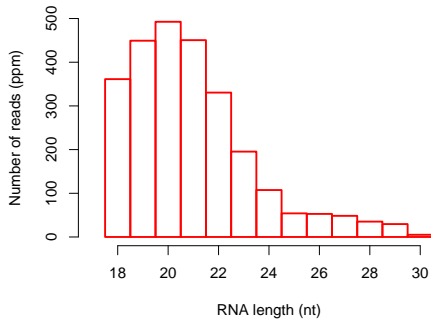

19-mers:

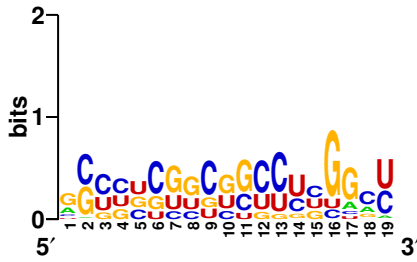

20-mers:

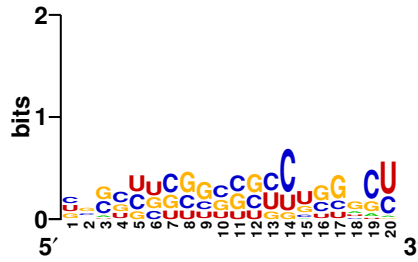

18-mers:

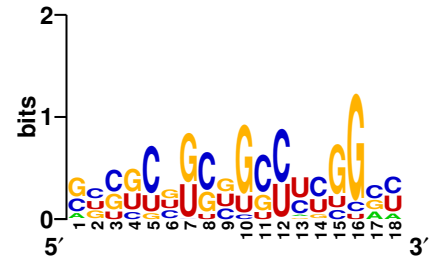

21-mers:

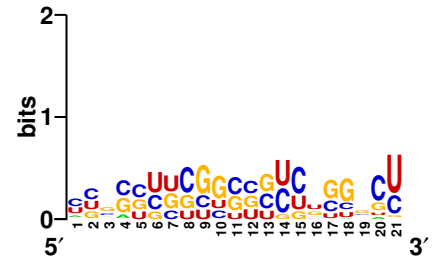

22-mers:

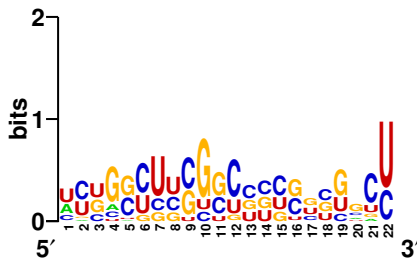

23-mers:

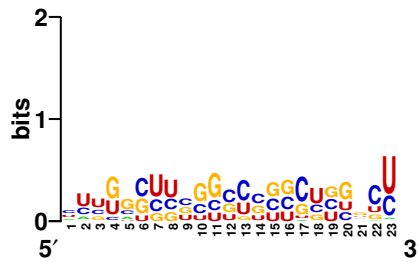

24-mers:

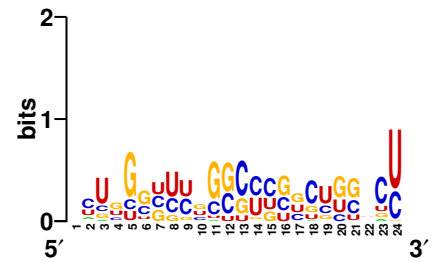

25-mers:

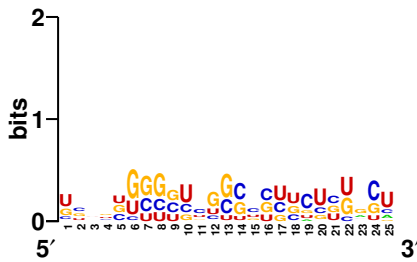

26-mers:

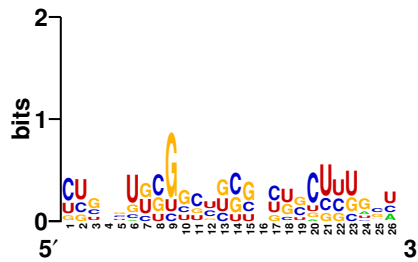

27-mers:

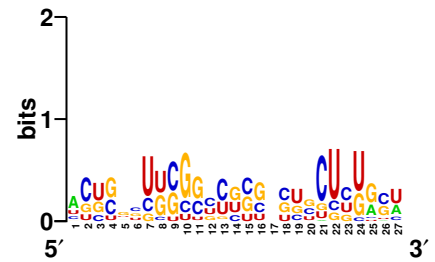

28-mers:

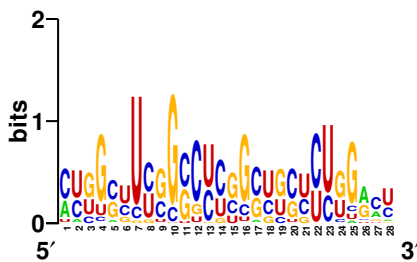

29-mers:

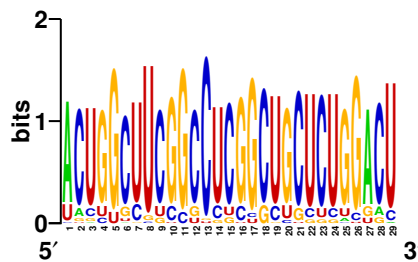

30-mers:

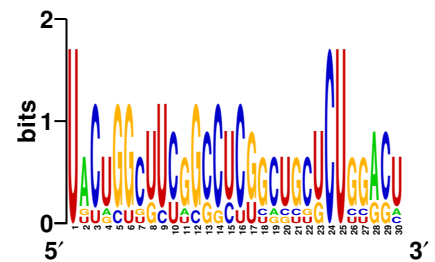

Embryo 36h, library 3:

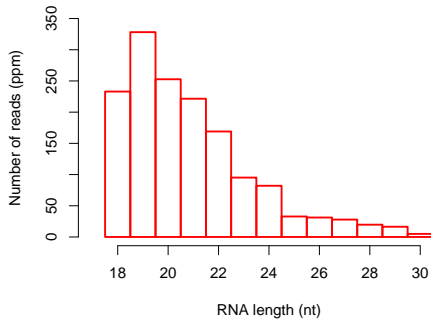

19-mers:

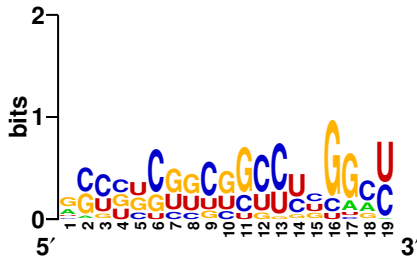

22-mers:

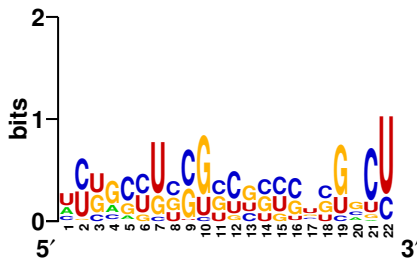

25-mers:

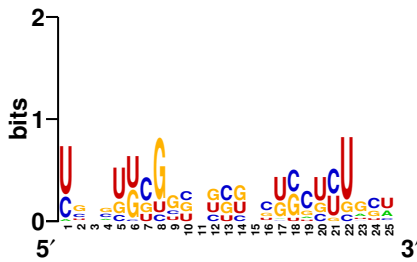

28-mers:

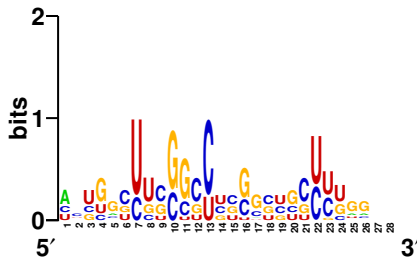

20-mers:

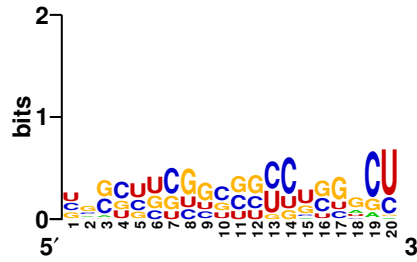

23-mers:

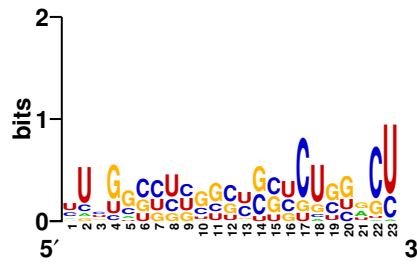

26-mers:

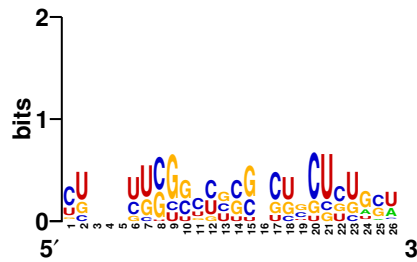

29-mers:

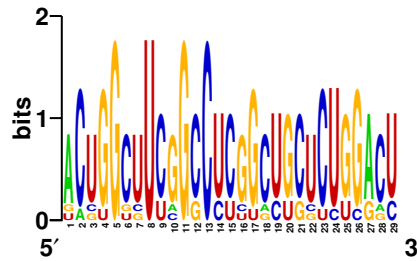

18-mers:

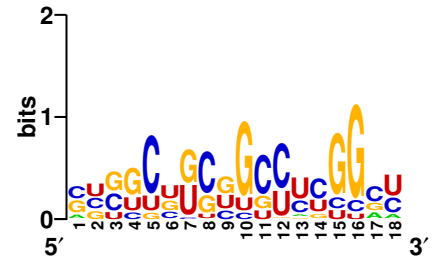

21-mers:

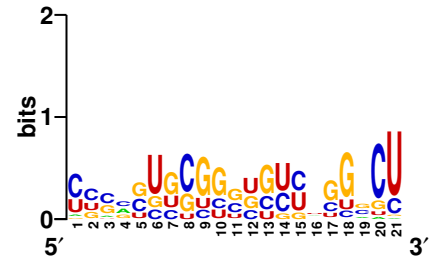

24-mers:

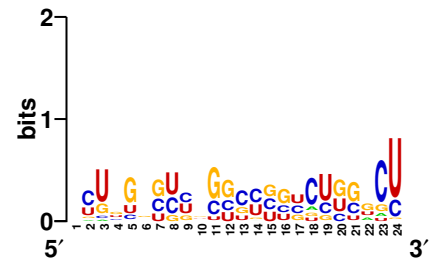

27-mers:

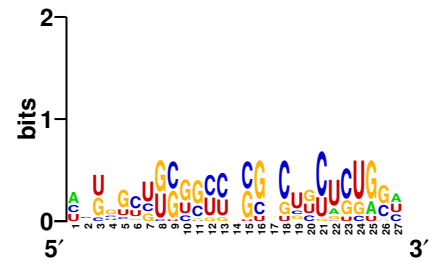

30-mers:

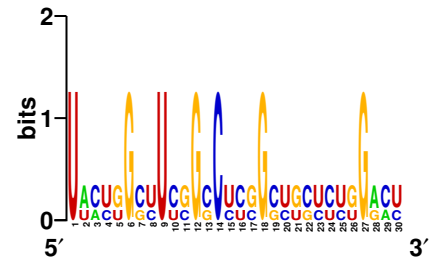

Embryo 60h, library 3:

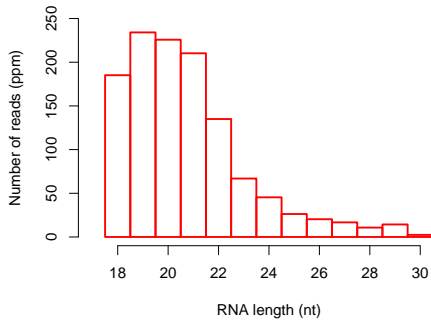

19-mers:

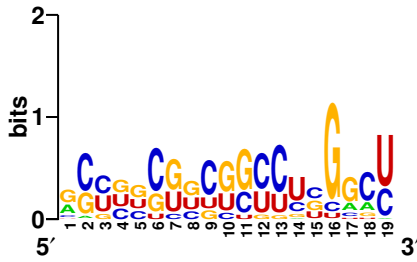

20-mers:

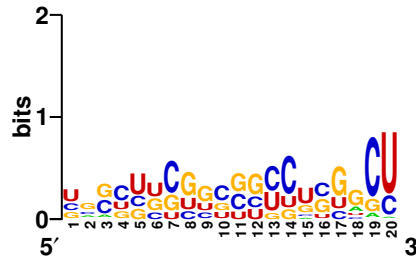

18-mers:

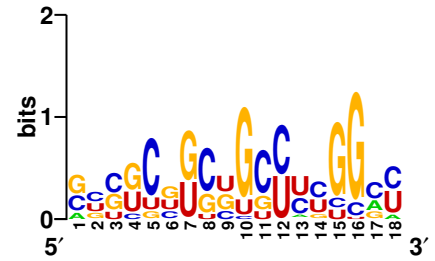

21-mers:

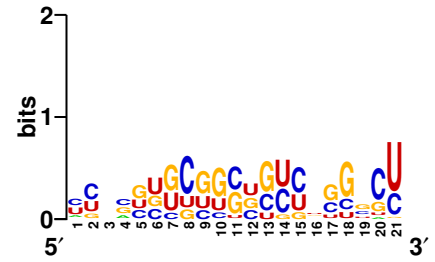

22-mers:

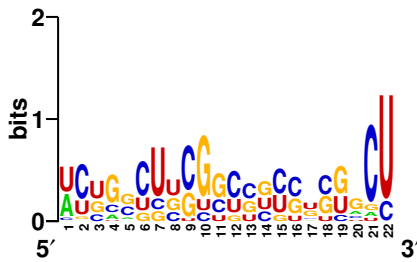

23-mers:

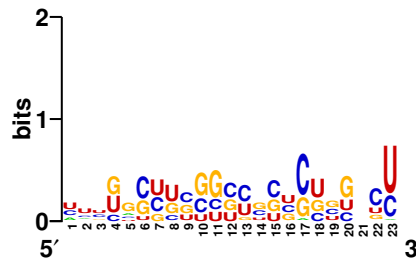

24-mers:

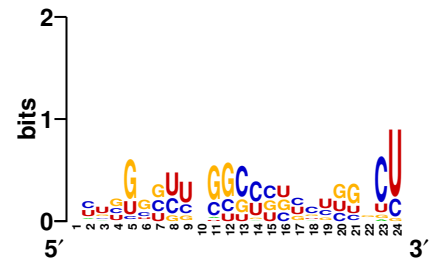

25-mers:

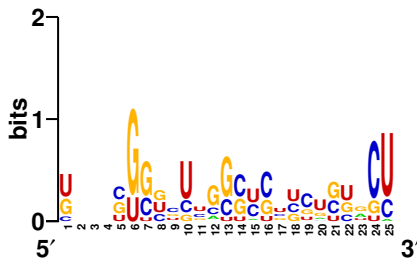

26-mers:

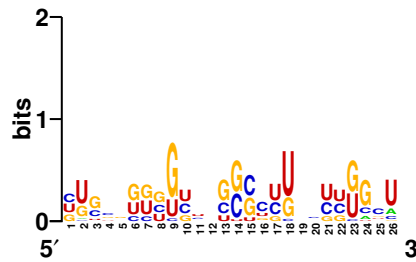

27-mers:

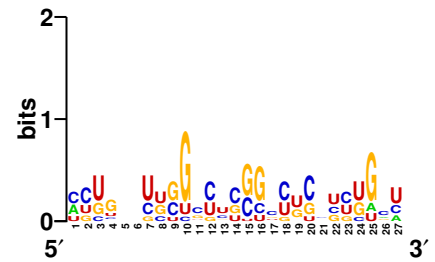

28-mers:

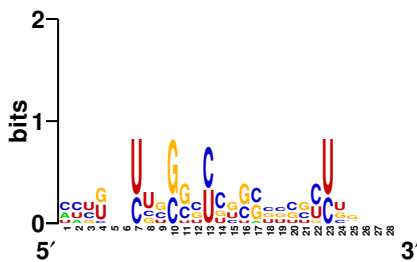

29-mers:

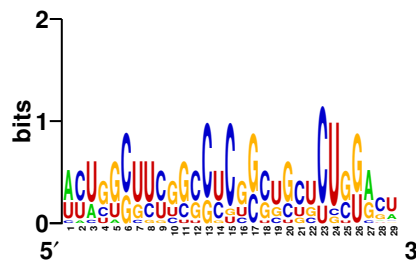

30-mers:

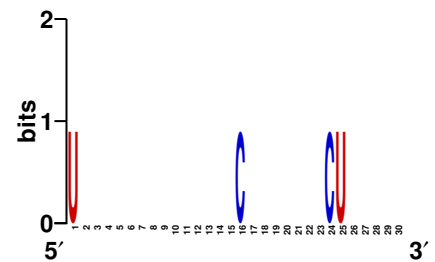



Adult female, library 3:

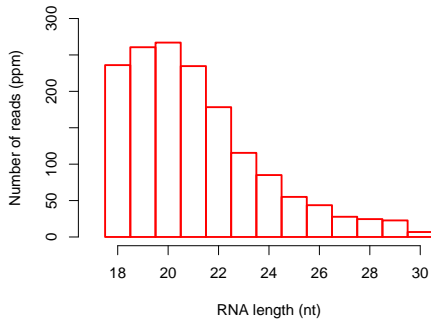

18-mers:

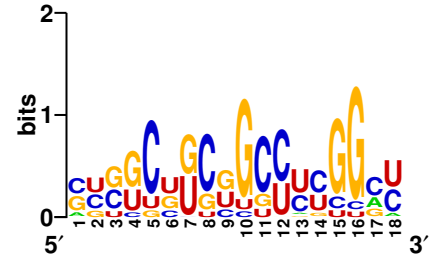

19-mers:

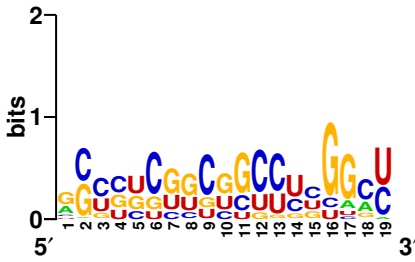

20-mers:

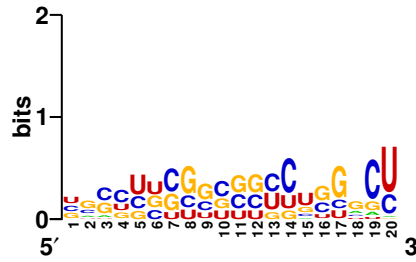

21-mers:

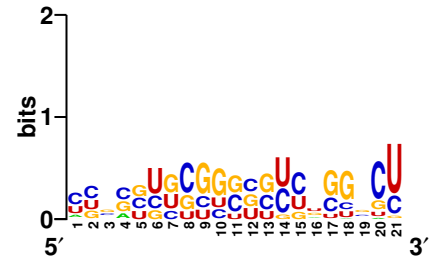

22-mers:

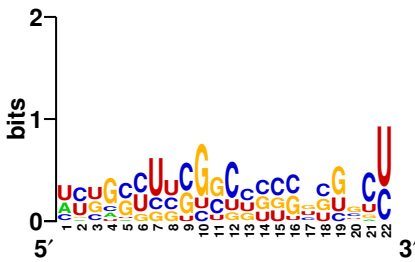

23-mers:

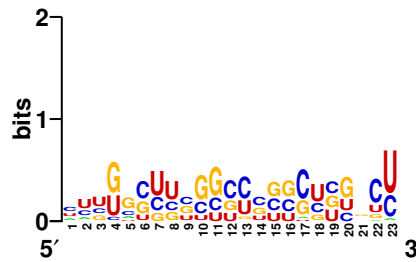

24-mers:

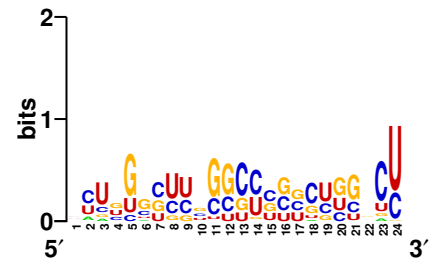

25-mers:

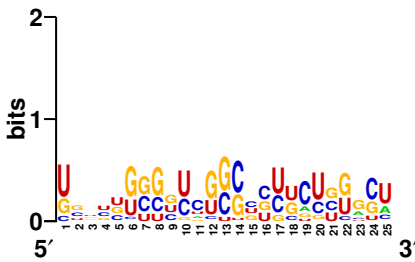

26-mers:

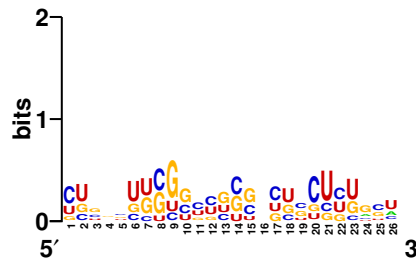

27-mers:

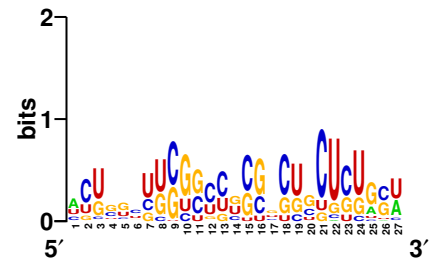

28-mers:

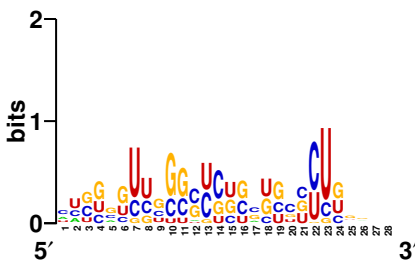

29-mers:

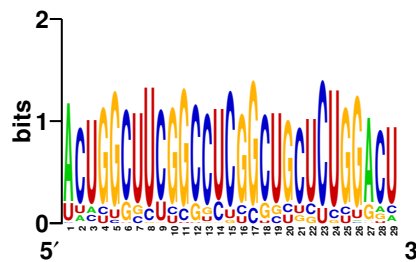

30-mers:

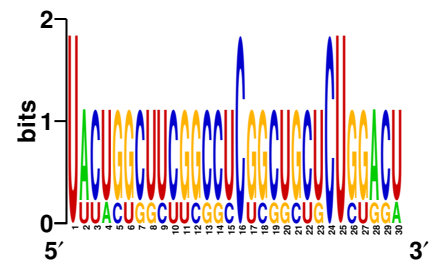



## 14.4 Libraries #4 (3' modified, 5' hydroxyl or polyphosphorylated small RNAs)

Embryo 8h, library 4:



18-mers:

(no read)

19-mers:

20-mers:

21-mers:

(no read)

(no read)

(no read)

22-mers:

23-mers:

24-mers:

(no read)

(no read)

(no read)

25-mers:

26-mers:

27-mers:

(no read)

(no read)

(no read)

28-mers:

29-mers:

30-mers:

(no read)

(no read)

(no read)

Embryo 15h, library 4:

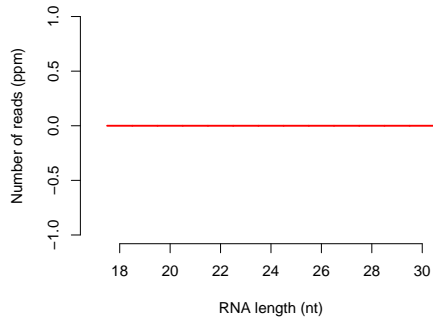

18-mers:

|           |           |           |           |           |           |
|-----------|-----------|-----------|-----------|-----------|-----------|
| 19-mers:  | (no read) | 20-mers:  | (no read) | 21-mers:  | (no read) |
| (no read) |           | (no read) |           | (no read) |           |
| 22-mers:  | (no read) | 23-mers:  | (no read) | 24-mers:  | (no read) |
| (no read) |           | (no read) |           | (no read) |           |
| 25-mers:  | (no read) | 26-mers:  | (no read) | 27-mers:  | (no read) |
| (no read) |           | (no read) |           | (no read) |           |
| 28-mers:  | (no read) | 29-mers:  | (no read) | 30-mers:  | (no read) |
| (no read) |           | (no read) |           | (no read) |           |

Embryo 36h, library 4:

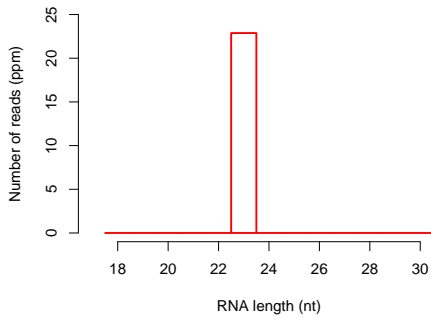

19-mers:  
(no read)  
22-mers:

20-mers:  
(no read)  
23-mers:

18-mers:

(no read)  
21-mers:  
(no read)  
24-mers:

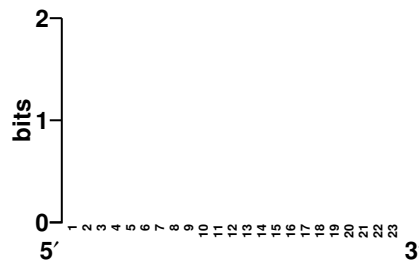

(no read)  
25-mers:  
(no read)  
28-mers:  
(no read)

26-mers:  
(no read)  
29-mers:  
(no read)

(no read)  
27-mers:  
(no read)  
30-mers:  
(no read)

Embryo 60h, library 4:

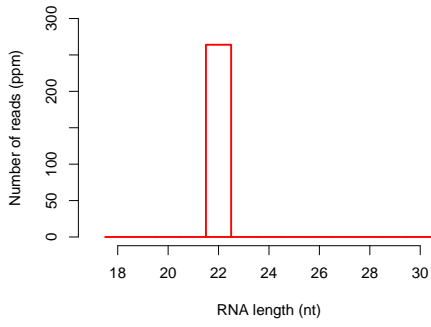

19-mers:  
(no read)  
22-mers:

20-mers:  
(no read)  
23-mers:

18-mers:  
(no read)  
21-mers:  
(no read)  
24-mers:

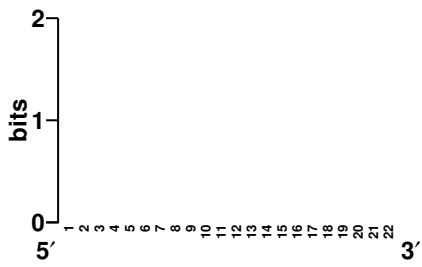

25-mers:  
(no read)  
28-mers:  
(no read)

(no read)  
26-mers:  
(no read)  
29-mers:  
(no read)

(no read)  
27-mers:  
(no read)  
30-mers:  
(no read)

Adult female, library 4:



18-mers:

|           |           |           |           |
|-----------|-----------|-----------|-----------|
| 19-mers:  | (no read) | 20-mers:  | 21-mers:  |
| (no read) |           | (no read) | (no read) |
| 22-mers:  |           | 23-mers:  | 24-mers:  |
| (no read) |           | (no read) | (no read) |
| 25-mers:  |           | 26-mers:  | 27-mers:  |
| (no read) |           | (no read) | (no read) |
| 28-mers:  |           | 29-mers:  | 30-mers:  |
| (no read) |           | (no read) | (no read) |

Adult male, library 4:

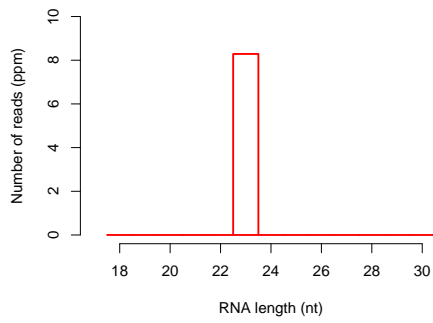

19-mers:  
(no read)  
22-mers:

20-mers:  
(no read)  
23-mers:

18-mers:

(no read)  
21-mers:  
(no read)  
24-mers:

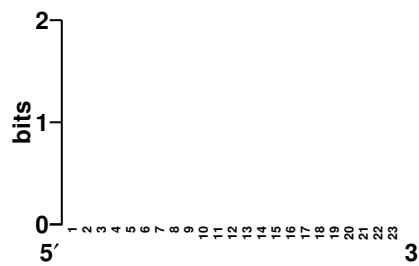

(no read)  
25-mers:  
(no read)  
28-mers:  
(no read)

26-mers:  
(no read)  
29-mers:  
(no read)

(no read)  
27-mers:  
(no read)  
30-mers:  
(no read)



# 15 Extragenomic and extratranscriptomic reads matching extragenomic contig #10883

## 15.1 Libraries #1 (total 5' monophosphorylated small RNAs)

Embryo 8h, library 1:

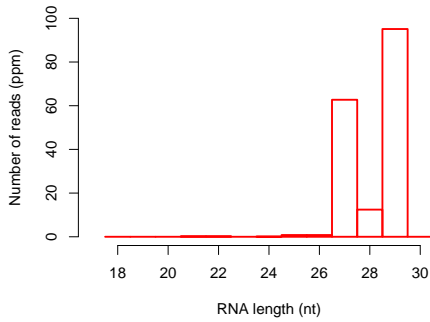

19-mers:

20-mers:

18-mers:

(no read)  
21-mers:

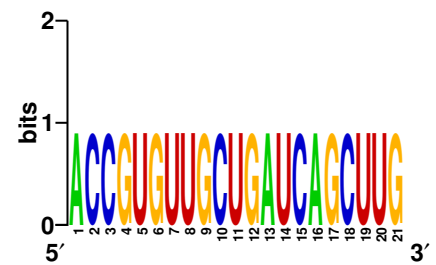

(no read)  
22-mers:

(no read)  
23-mers:

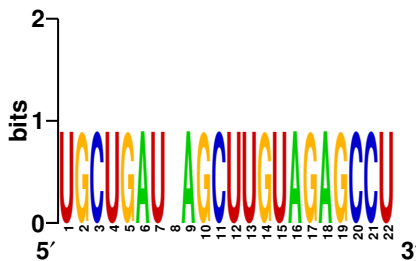

24-mers:

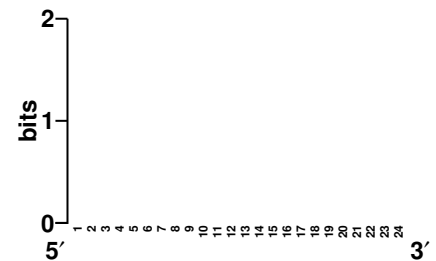

25-mers:

(no read)  
26-mers:

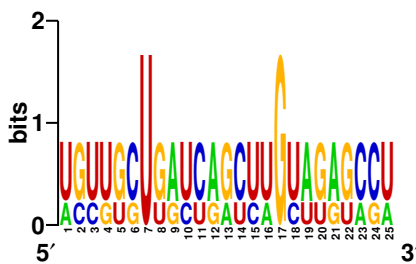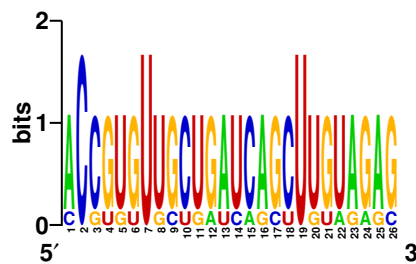

27-mers:

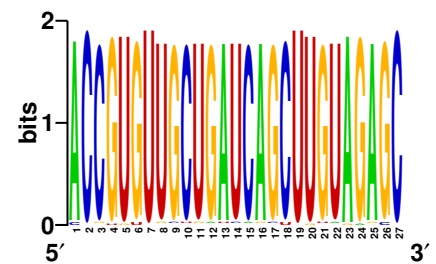

28-mers:

29-mers:

30-mers:

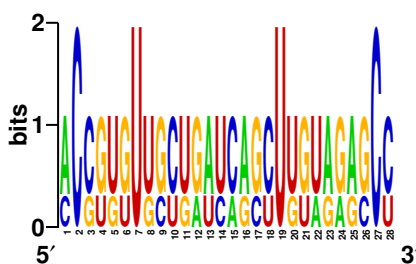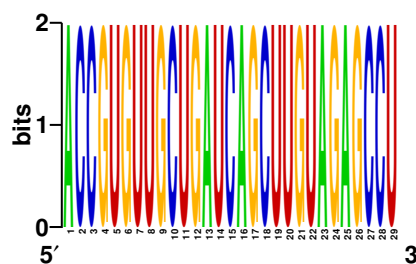

(no read)



Embryo 36h, library 1:

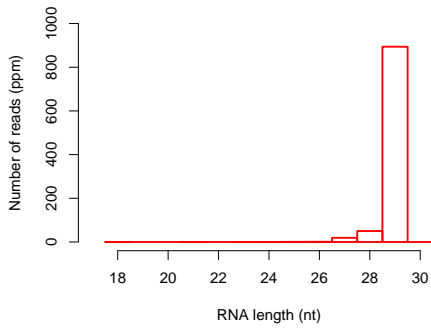

19-mers:

(no read)  
22-mers:

(no read)  
25-mers:

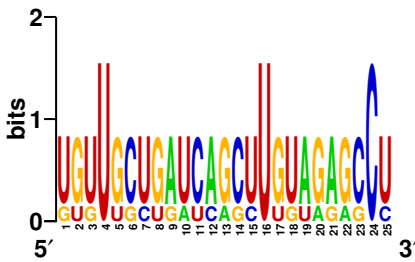

28-mers:

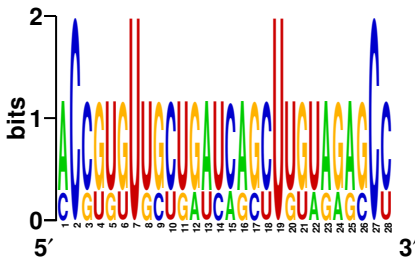

20-mers:

(no read)  
23-mers:

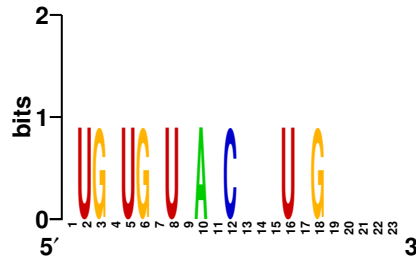

26-mers:

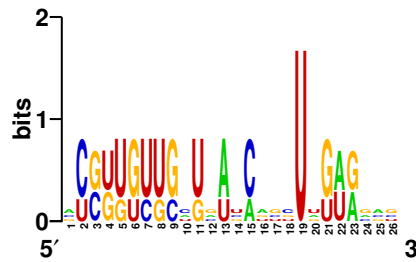

29-mers:

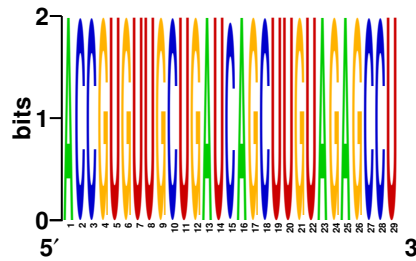

18-mers:



21-mers:



24-mers:

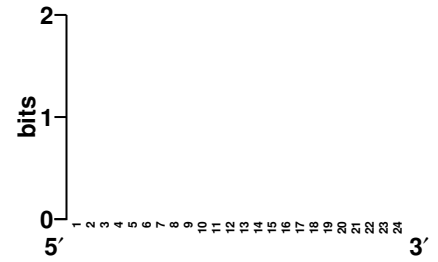

27-mers:

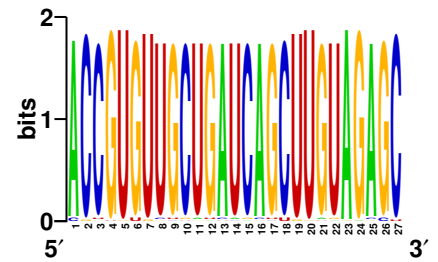

30-mers:

(no read)

Embryo 60h, library 1:

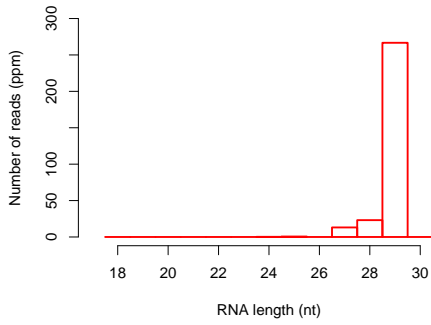

19-mers:  
(no read)  
22-mers:

20-mers:  
(no read)  
23-mers:

18-mers:

(no read)  
21-mers:  
(no read)  
24-mers:

(no read)  
25-mers:

(no read)  
26-mers:

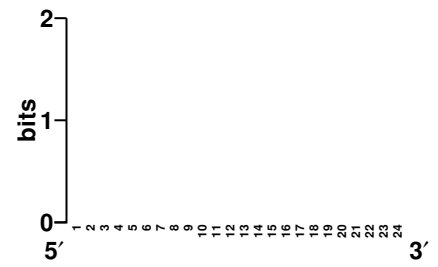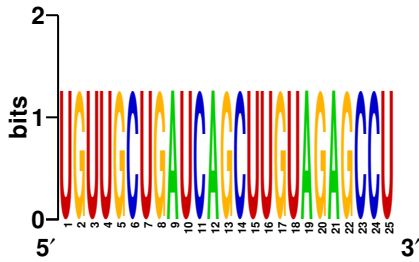

(no read)  
29-mers:

27-mers:

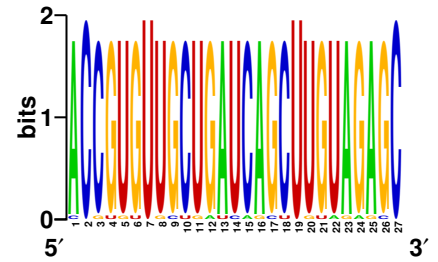

28-mers:

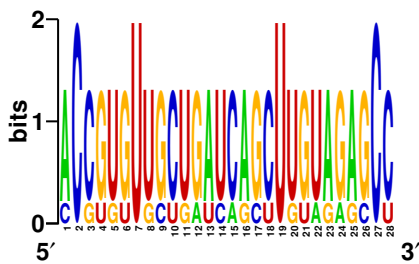

(no read)  
30-mers:

30-mers:

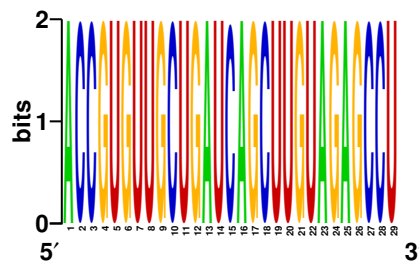

(no read)

Adult female, library 1:

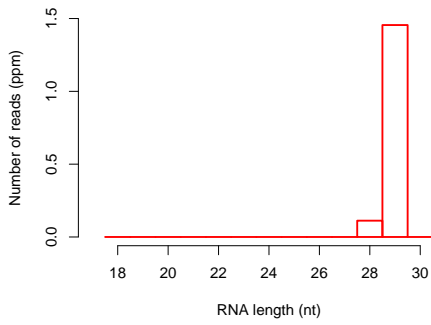

19-mers:  
(no read)  
22-mers:  
(no read)  
25-mers:  
(no read)  
28-mers:

20-mers:  
(no read)  
23-mers:  
(no read)  
26-mers:  
(no read)  
29-mers:

18-mers:

(no read)  
21-mers:  
(no read)  
24-mers:  
(no read)  
27-mers:  
(no read)  
30-mers:

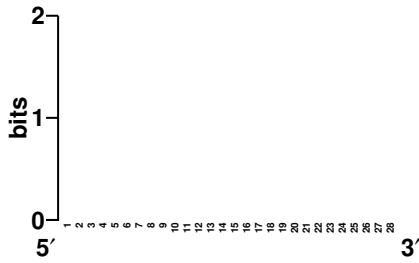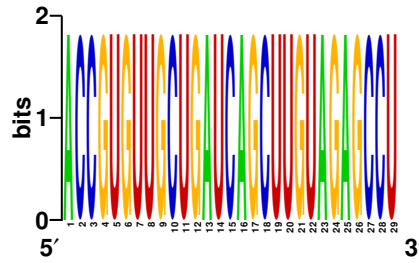

(no read)

Adult male, library 1:

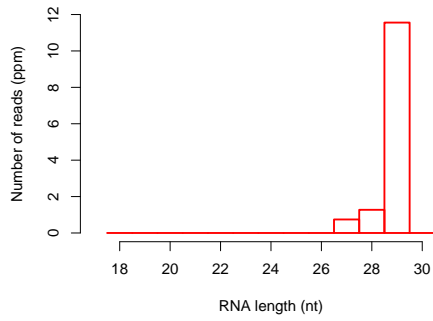

19-mers:  
(no read)  
22-mers:  
(no read)  
25-mers:

20-mers:  
(no read)  
23-mers:  
(no read)  
26-mers:

18-mers:

(no read)  
21-mers:  
(no read)  
24-mers:  
(no read)  
27-mers:

(no read)  
28-mers:

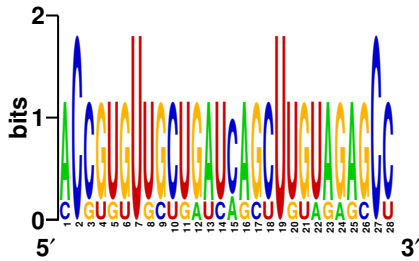

(no read)  
29-mers:

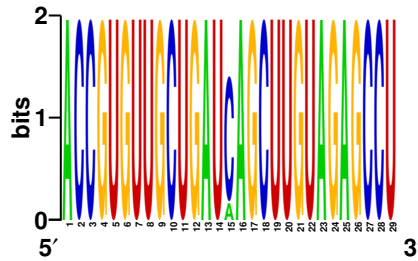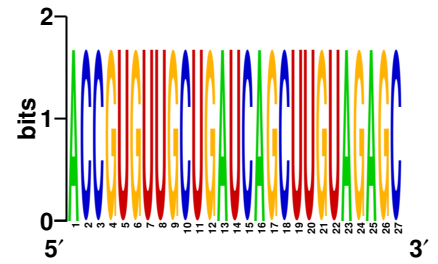

30-mers:

(no read)

## 15.2 Libraries #2 (3' modified, 5' monophosphorylated small RNAs)

Embryo 8h, library 2:



18-mers:

(no read)

19-mers:

20-mers:

21-mers:

(no read)

(no read)

(no read)

22-mers:

23-mers:

24-mers:

(no read)

(no read)

(no read)

25-mers:

26-mers:

27-mers:

(no read)

(no read)

(no read)

28-mers:

29-mers:

30-mers:

(no read)

(no read)

(no read)

Embryo 15h, library 2:



18-mers:

|           |           |           |           |           |           |
|-----------|-----------|-----------|-----------|-----------|-----------|
| 19-mers:  | (no read) | 20-mers:  | (no read) | 21-mers:  | (no read) |
| (no read) |           | (no read) |           | (no read) |           |
| 22-mers:  | (no read) | 23-mers:  | (no read) | 24-mers:  | (no read) |
| (no read) |           | (no read) |           | (no read) |           |
| 25-mers:  | (no read) | 26-mers:  | (no read) | 27-mers:  | (no read) |
| (no read) |           | (no read) |           | (no read) |           |
| 28-mers:  | (no read) | 29-mers:  | (no read) | 30-mers:  | (no read) |
| (no read) |           | (no read) |           | (no read) |           |



Embryo 36h, library 2:



18-mers:

|          |           |          |           |          |           |
|----------|-----------|----------|-----------|----------|-----------|
| 19-mers: | (no read) | 20-mers: | (no read) | 21-mers: | (no read) |
| 22-mers: | (no read) | 23-mers: | (no read) | 24-mers: | (no read) |
| 25-mers: | (no read) | 26-mers: | (no read) | 27-mers: | (no read) |
| 28-mers: | (no read) | 29-mers: | (no read) | 30-mers: | (no read) |

Embryo 60h, library 2:



18-mers:

|           |           |           |           |           |           |
|-----------|-----------|-----------|-----------|-----------|-----------|
| 19-mers:  | (no read) | 20-mers:  | (no read) | 21-mers:  | (no read) |
| (no read) |           | (no read) |           | (no read) |           |
| 22-mers:  | (no read) | 23-mers:  | (no read) | 24-mers:  | (no read) |
| (no read) |           | (no read) |           | (no read) |           |
| 25-mers:  | (no read) | 26-mers:  | (no read) | 27-mers:  | (no read) |
| (no read) |           | (no read) |           | (no read) |           |
| 28-mers:  | (no read) | 29-mers:  | (no read) | 30-mers:  | (no read) |
| (no read) |           | (no read) |           | (no read) |           |

Adult female, library 2:



18-mers:

|           |           |           |           |           |           |
|-----------|-----------|-----------|-----------|-----------|-----------|
| 19-mers:  | (no read) | 20-mers:  | (no read) | 21-mers:  | (no read) |
| (no read) |           | (no read) |           | (no read) |           |
| 22-mers:  | (no read) | 23-mers:  | (no read) | 24-mers:  | (no read) |
| (no read) |           | (no read) |           | (no read) |           |
| 25-mers:  | (no read) | 26-mers:  | (no read) | 27-mers:  | (no read) |
| (no read) |           | (no read) |           | (no read) |           |
| 28-mers:  | (no read) | 29-mers:  | (no read) | 30-mers:  | (no read) |
| (no read) |           | (no read) |           | (no read) |           |

Adult male, library 2:

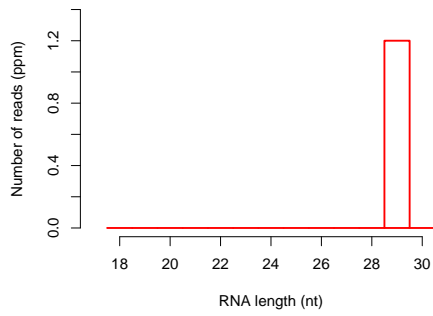

19-mers:  
(no read)  
22-mers:  
(no read)  
25-mers:  
(no read)  
28-mers:

20-mers:  
(no read)  
23-mers:  
(no read)  
26-mers:  
(no read)  
29-mers:

18-mers:

(no read)  
21-mers:  
(no read)  
24-mers:  
(no read)  
27-mers:  
(no read)  
30-mers:

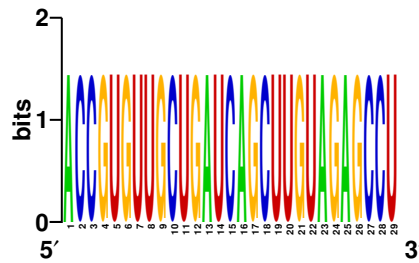

(no read)

(no read)

### 15.3 Libraries #3 (total 5' hydroxyl or polyphosphorylated small RNAs)

Embryo 8h, library 3:

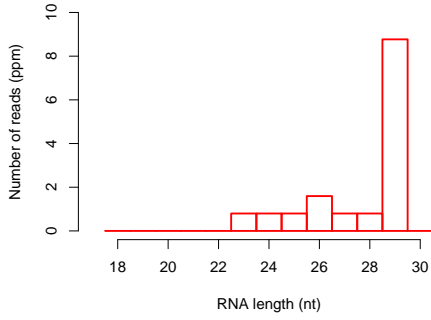

19-mers:  
(no read)  
22-mers:

20-mers:  
(no read)  
23-mers:

18-mers:

(no read)  
21-mers:  
(no read)  
24-mers:

(no read)  
25-mers:

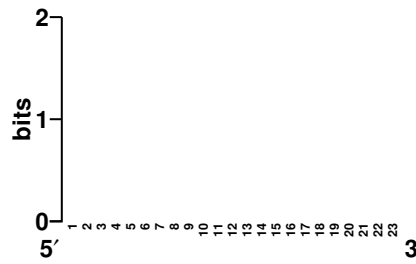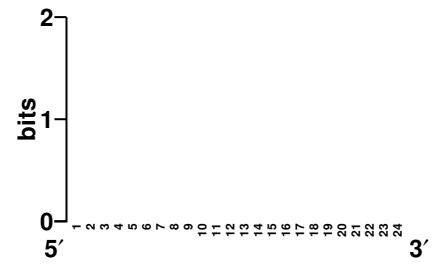

26-mers:

27-mers:

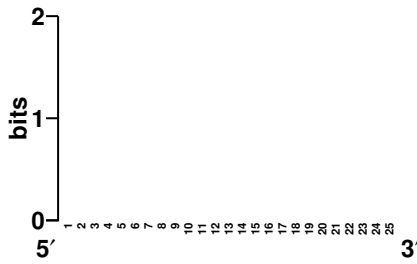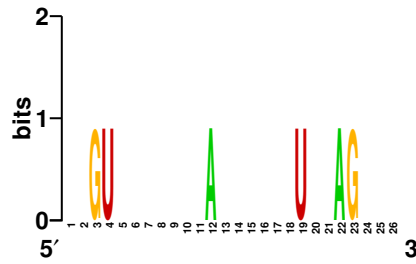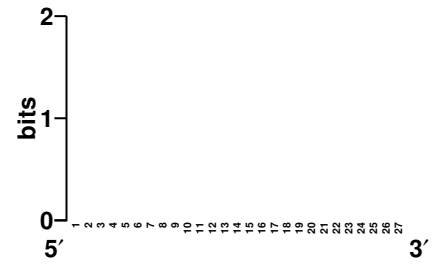

28-mers:

29-mers:

30-mers:

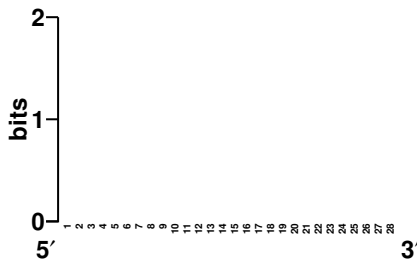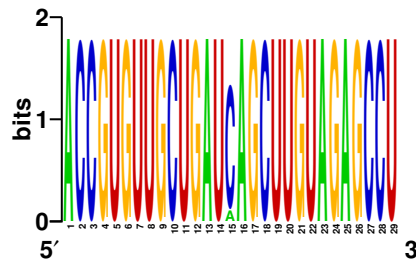

(no read)

Embryo 15h, library 3:

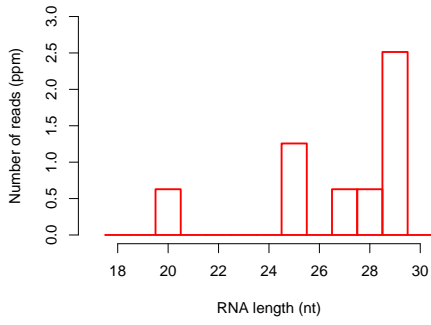

19-mers:

20-mers:



(no read)  
22-mers:  
(no read)  
25-mers:

23-mers:  
(no read)  
26-mers:

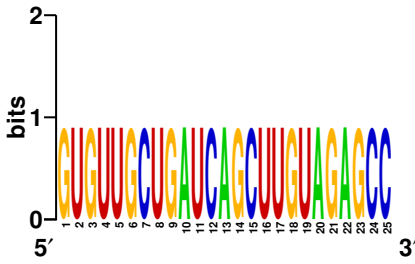

28-mers:

(no read)  
29-mers:



18-mers:

(no read)  
21-mers:

(no read)  
24-mers:  
(no read)  
27-mers:

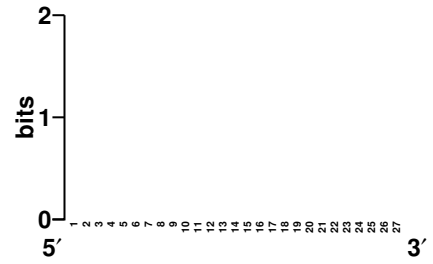

30-mers:

(no read)

Embryo 36h, library 3:

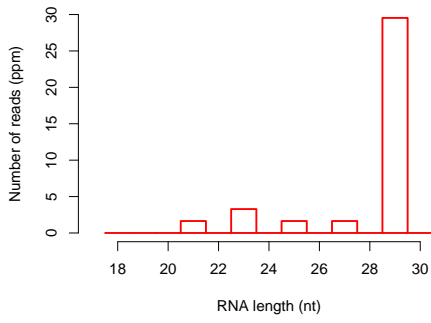

19-mers:

20-mers:

18-mers:

(no read)

21-mers:



(no read)

22-mers:

(no read)

23-mers:

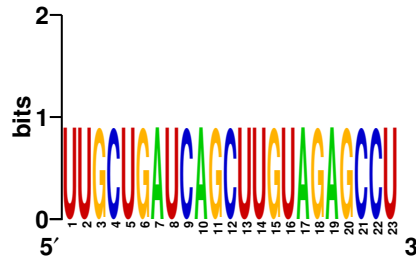

(no read)

25-mers:

26-mers:

24-mers:



(no read)

27-mers:



28-mers:

(no read)

29-mers:

30-mers:

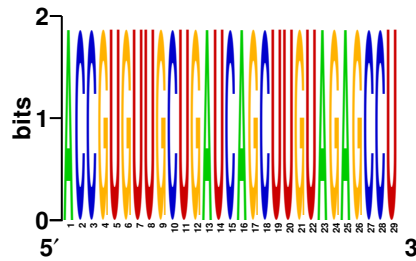

(no read)

(no read)

Embryo 60h, library 3:

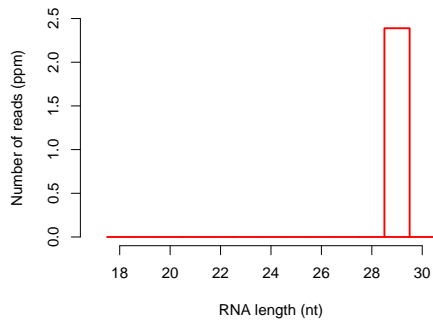

19-mers:  
(no read)  
22-mers:  
(no read)  
25-mers:  
(no read)  
28-mers:

20-mers:  
(no read)  
23-mers:  
(no read)  
26-mers:  
(no read)  
29-mers:

18-mers:

(no read)  
21-mers:  
(no read)  
24-mers:  
(no read)  
27-mers:  
(no read)  
30-mers:

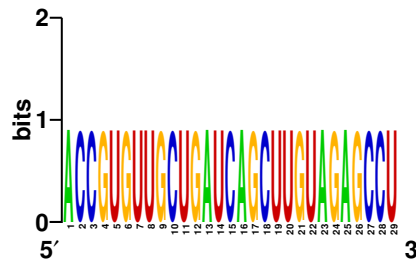

(no read)

(no read)



Adult female, library 3:

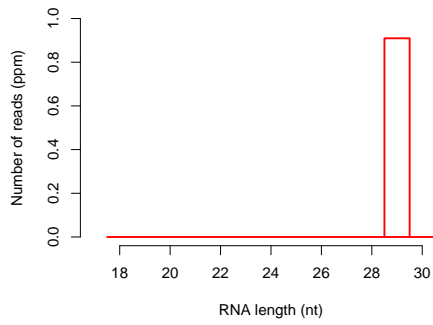

19-mers:  
(no read)  
22-mers:  
(no read)  
25-mers:  
(no read)  
28-mers:

20-mers:  
(no read)  
23-mers:  
(no read)  
26-mers:  
(no read)  
29-mers:

18-mers:

(no read)  
21-mers:  
(no read)  
24-mers:  
(no read)  
27-mers:  
(no read)  
30-mers:

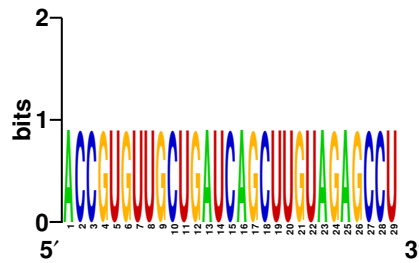

(no read)

(no read)

Adult male, library 3:



18-mers:

|           |           |           |           |           |           |
|-----------|-----------|-----------|-----------|-----------|-----------|
| 19-mers:  | (no read) | 20-mers:  | (no read) | 21-mers:  | (no read) |
| (no read) |           | (no read) |           | (no read) |           |
| 22-mers:  | (no read) | 23-mers:  | (no read) | 24-mers:  | (no read) |
| (no read) |           | (no read) |           | (no read) |           |
| 25-mers:  | (no read) | 26-mers:  | (no read) | 27-mers:  | (no read) |
| (no read) |           | (no read) |           | (no read) |           |
| 28-mers:  | (no read) | 29-mers:  | (no read) | 30-mers:  | (no read) |
| (no read) |           | (no read) |           | (no read) |           |

## 15.4 Libraries #4 (3' modified, 5' hydroxyl or polyphosphorylated small RNAs)

Embryo 8h, library 4:

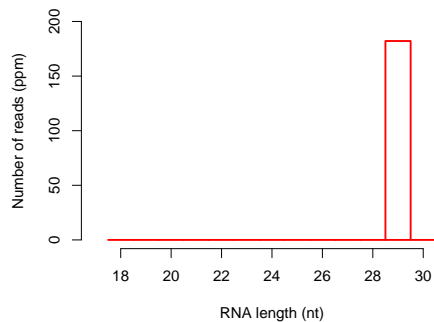

18-mers:

19-mers:  
(no read)  
22-mers:  
(no read)  
25-mers:  
(no read)  
28-mers:

20-mers:  
(no read)  
23-mers:  
(no read)  
26-mers:  
(no read)  
29-mers:

(no read)  
21-mers:  
(no read)  
24-mers:  
(no read)  
27-mers:  
(no read)  
30-mers:

(no read)

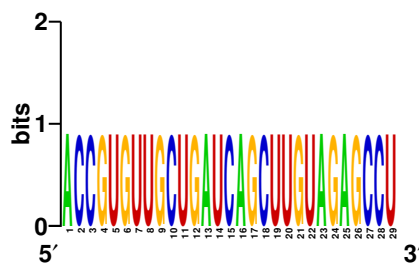

(no read)

Embryo 15h, library 4:

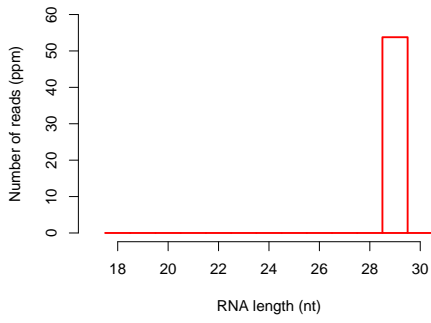

19-mers:  
(no read)  
22-mers:  
(no read)  
25-mers:  
(no read)  
28-mers:

20-mers:  
(no read)  
23-mers:  
(no read)  
26-mers:  
(no read)  
29-mers:

18-mers:

(no read)  
21-mers:  
(no read)  
24-mers:  
(no read)  
27-mers:  
(no read)  
30-mers:

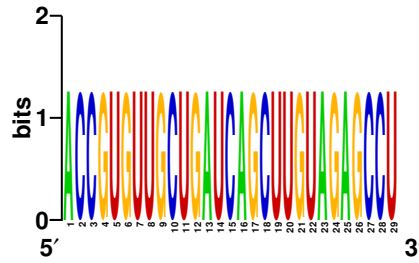

(no read)

(no read)

Embryo 36h, library 4:

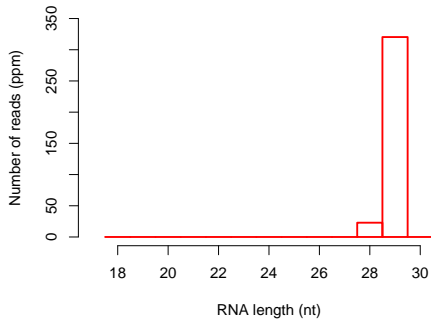

19-mers:  
(no read)  
22-mers:  
(no read)  
25-mers:  
(no read)  
28-mers:

20-mers:  
(no read)  
23-mers:  
(no read)  
26-mers:  
(no read)  
29-mers:

18-mers:

(no read)  
21-mers:  
(no read)  
24-mers:  
(no read)  
27-mers:  
(no read)  
30-mers:

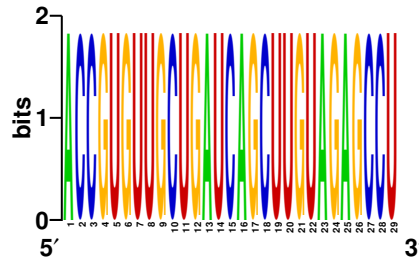

(no read)

Embryo 60h, library 4:



18-mers:

|           |           |           |           |           |           |
|-----------|-----------|-----------|-----------|-----------|-----------|
| 19-mers:  | (no read) | 20-mers:  | (no read) | 21-mers:  | (no read) |
| (no read) |           | (no read) |           | (no read) |           |
| 22-mers:  | (no read) | 23-mers:  | (no read) | 24-mers:  | (no read) |
| (no read) |           | (no read) |           | (no read) |           |
| 25-mers:  | (no read) | 26-mers:  | (no read) | 27-mers:  | (no read) |
| (no read) |           | (no read) |           | (no read) |           |
| 28-mers:  | (no read) | 29-mers:  | (no read) | 30-mers:  | (no read) |
| (no read) |           | (no read) |           | (no read) |           |

Adult female, library 4:



18-mers:

|           |           |           |           |           |           |
|-----------|-----------|-----------|-----------|-----------|-----------|
| 19-mers:  | (no read) | 20-mers:  | (no read) | 21-mers:  | (no read) |
| (no read) |           | (no read) |           | (no read) |           |
| 22-mers:  | (no read) | 23-mers:  | (no read) | 24-mers:  | (no read) |
| (no read) |           | (no read) |           | (no read) |           |
| 25-mers:  | (no read) | 26-mers:  | (no read) | 27-mers:  | (no read) |
| (no read) |           | (no read) |           | (no read) |           |
| 28-mers:  | (no read) | 29-mers:  | (no read) | 30-mers:  | (no read) |
| (no read) |           | (no read) |           | (no read) |           |

Adult male, library 4:

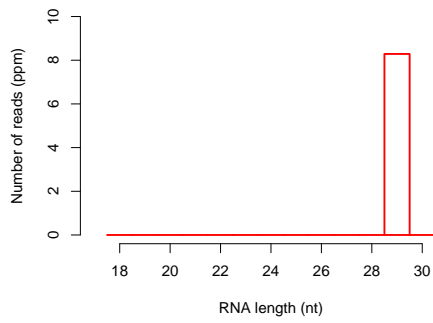

19-mers:  
(no read)  
22-mers:  
(no read)  
25-mers:  
(no read)  
28-mers:

20-mers:  
(no read)  
23-mers:  
(no read)  
26-mers:  
(no read)  
29-mers:

18-mers:

(no read)  
21-mers:  
(no read)  
24-mers:  
(no read)  
27-mers:  
(no read)  
30-mers:

(no read)

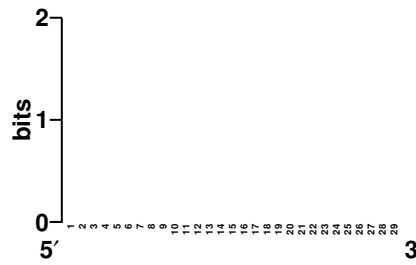

(no read)



## References

- [Gu et al., 2009] Gu, W., Shirayama, M., Conte, D. J., Vasale, J., Batista, P. J., Claycomb, J. M., Moresco, J. J., Youngman, E. M., Keys, J., Stoltz, M. J., Chen, C. C., Chaves, D. A., Duan, S., Kasschau, K. D., Fahlgren, N., Yates, J. R., Mitani, S., Carrington, J. C., and Mello, C. C. (2009). Distinct argonaute-mediated 22G-RNA pathways direct genome surveillance in the *C. elegans* germline. *Mol Cell*, 36(2):231–244.
