# Supplementary material for: Functional lability of RNA-dependent RNA polymerases in animals
Source: PubMed Central journal article supplement (PMC6396948; doi:10.1371/journal.pgen.1007915), 2019-02-19
Supplement: pgen.1007915.s008.pdf [file pgen.1007915.s008.pdf]

| Pre-miRNA                                                                         | miRNA sequences                                                          | Abundance profile in development                                                                                                                                                                                                                                                                                                                                                                                                                                            |                     |                    |                    |       |    |   |        |   |    |        |    |     |        |    |     |       |      |      |
|-----------------------------------------------------------------------------------|--------------------------------------------------------------------------|-----------------------------------------------------------------------------------------------------------------------------------------------------------------------------------------------------------------------------------------------------------------------------------------------------------------------------------------------------------------------------------------------------------------------------------------------------------------------------|---------------------|--------------------|--------------------|-------|----|---|--------|---|----|--------|----|-----|--------|----|-----|-------|------|------|
| bfl-mir-71<br>ortholog at<br>Sc0000005<br>bp 2992213-<br>2992115<br>(- strand)    | 5' arm:<br>UGAAAGACAUGGGUAGUGAGAU<br><br>3' arm:<br>CCCAUUCCCUGUCUUUCAAC | <table border="1"> <caption>Abundance profile for bfl-mir-71</caption> <thead> <tr> <th>Developmental stage</th> <th>5' arm miRNA (ppm)</th> <th>3' arm miRNA (ppm)</th> </tr> </thead> <tbody> <tr> <td>8 hpf</td> <td>22</td> <td>4</td> </tr> <tr> <td>15 hpf</td> <td>1</td> <td>1</td> </tr> <tr> <td>36 hpf</td> <td>15</td> <td>2</td> </tr> <tr> <td>60 hpf</td> <td>21</td> <td>12</td> </tr> <tr> <td>Adult</td> <td>27</td> <td>1</td> </tr> </tbody> </table>   | Developmental stage | 5' arm miRNA (ppm) | 3' arm miRNA (ppm) | 8 hpf | 22 | 4 | 15 hpf | 1 | 1  | 36 hpf | 15 | 2   | 60 hpf | 21 | 12  | Adult | 27   | 1    |
| Developmental stage                                                               | 5' arm miRNA (ppm)                                                       | 3' arm miRNA (ppm)                                                                                                                                                                                                                                                                                                                                                                                                                                                          |                     |                    |                    |       |    |   |        |   |    |        |    |     |        |    |     |       |      |      |
| 8 hpf                                                                             | 22                                                                       | 4                                                                                                                                                                                                                                                                                                                                                                                                                                                                           |                     |                    |                    |       |    |   |        |   |    |        |    |     |        |    |     |       |      |      |
| 15 hpf                                                                            | 1                                                                        | 1                                                                                                                                                                                                                                                                                                                                                                                                                                                                           |                     |                    |                    |       |    |   |        |   |    |        |    |     |        |    |     |       |      |      |
| 36 hpf                                                                            | 15                                                                       | 2                                                                                                                                                                                                                                                                                                                                                                                                                                                                           |                     |                    |                    |       |    |   |        |   |    |        |    |     |        |    |     |       |      |      |
| 60 hpf                                                                            | 21                                                                       | 12                                                                                                                                                                                                                                                                                                                                                                                                                                                                          |                     |                    |                    |       |    |   |        |   |    |        |    |     |        |    |     |       |      |      |
| Adult                                                                             | 27                                                                       | 1                                                                                                                                                                                                                                                                                                                                                                                                                                                                           |                     |                    |                    |       |    |   |        |   |    |        |    |     |        |    |     |       |      |      |
| bfl-mir-4856b<br>ortholog at<br>Sc0000022<br>bp 2102339-<br>2102425<br>(+ strand) | 5' arm:<br>UCGCAUUGACGUCAGCGCCGUU<br><br>3' arm:<br>(low abundance)      | <table border="1"> <caption>Abundance profile for bfl-mir-4856b</caption> <thead> <tr> <th>Developmental stage</th> <th>5' arm miRNA (ppm)</th> <th>3' arm miRNA (ppm)</th> </tr> </thead> <tbody> <tr> <td>8 hpf</td> <td>0</td> <td>0</td> </tr> <tr> <td>15 hpf</td> <td>0</td> <td>0</td> </tr> <tr> <td>36 hpf</td> <td>0</td> <td>0</td> </tr> <tr> <td>60 hpf</td> <td>0</td> <td>0</td> </tr> <tr> <td>Adult</td> <td>25</td> <td>230</td> </tr> </tbody> </table>  | Developmental stage | 5' arm miRNA (ppm) | 3' arm miRNA (ppm) | 8 hpf | 0  | 0 | 15 hpf | 0 | 0  | 36 hpf | 0  | 0   | 60 hpf | 0  | 0   | Adult | 25   | 230  |
| Developmental stage                                                               | 5' arm miRNA (ppm)                                                       | 3' arm miRNA (ppm)                                                                                                                                                                                                                                                                                                                                                                                                                                                          |                     |                    |                    |       |    |   |        |   |    |        |    |     |        |    |     |       |      |      |
| 8 hpf                                                                             | 0                                                                        | 0                                                                                                                                                                                                                                                                                                                                                                                                                                                                           |                     |                    |                    |       |    |   |        |   |    |        |    |     |        |    |     |       |      |      |
| 15 hpf                                                                            | 0                                                                        | 0                                                                                                                                                                                                                                                                                                                                                                                                                                                                           |                     |                    |                    |       |    |   |        |   |    |        |    |     |        |    |     |       |      |      |
| 36 hpf                                                                            | 0                                                                        | 0                                                                                                                                                                                                                                                                                                                                                                                                                                                                           |                     |                    |                    |       |    |   |        |   |    |        |    |     |        |    |     |       |      |      |
| 60 hpf                                                                            | 0                                                                        | 0                                                                                                                                                                                                                                                                                                                                                                                                                                                                           |                     |                    |                    |       |    |   |        |   |    |        |    |     |        |    |     |       |      |      |
| Adult                                                                             | 25                                                                       | 230                                                                                                                                                                                                                                                                                                                                                                                                                                                                         |                     |                    |                    |       |    |   |        |   |    |        |    |     |        |    |     |       |      |      |
| bfl-mir-4876<br>ortholog at<br>Sc0000005<br>bp 2219860-<br>2219951<br>(+ strand)  | 5' arm:<br>(low abundance)<br><br>3' arm:<br>CUUACGUGCCACGUGAGGACUCU     | <table border="1"> <caption>Abundance profile for bfl-mir-4876</caption> <thead> <tr> <th>Developmental stage</th> <th>5' arm miRNA (ppm)</th> <th>3' arm miRNA (ppm)</th> </tr> </thead> <tbody> <tr> <td>8 hpf</td> <td>0</td> <td>0</td> </tr> <tr> <td>15 hpf</td> <td>0</td> <td>20</td> </tr> <tr> <td>36 hpf</td> <td>0</td> <td>250</td> </tr> <tr> <td>60 hpf</td> <td>0</td> <td>950</td> </tr> <tr> <td>Adult</td> <td>0</td> <td>0</td> </tr> </tbody> </table> | Developmental stage | 5' arm miRNA (ppm) | 3' arm miRNA (ppm) | 8 hpf | 0  | 0 | 15 hpf | 0 | 20 | 36 hpf | 0  | 250 | 60 hpf | 0  | 950 | Adult | 0    | 0    |
| Developmental stage                                                               | 5' arm miRNA (ppm)                                                       | 3' arm miRNA (ppm)                                                                                                                                                                                                                                                                                                                                                                                                                                                          |                     |                    |                    |       |    |   |        |   |    |        |    |     |        |    |     |       |      |      |
| 8 hpf                                                                             | 0                                                                        | 0                                                                                                                                                                                                                                                                                                                                                                                                                                                                           |                     |                    |                    |       |    |   |        |   |    |        |    |     |        |    |     |       |      |      |
| 15 hpf                                                                            | 0                                                                        | 20                                                                                                                                                                                                                                                                                                                                                                                                                                                                          |                     |                    |                    |       |    |   |        |   |    |        |    |     |        |    |     |       |      |      |
| 36 hpf                                                                            | 0                                                                        | 250                                                                                                                                                                                                                                                                                                                                                                                                                                                                         |                     |                    |                    |       |    |   |        |   |    |        |    |     |        |    |     |       |      |      |
| 60 hpf                                                                            | 0                                                                        | 950                                                                                                                                                                                                                                                                                                                                                                                                                                                                         |                     |                    |                    |       |    |   |        |   |    |        |    |     |        |    |     |       |      |      |
| Adult                                                                             | 0                                                                        | 0                                                                                                                                                                                                                                                                                                                                                                                                                                                                           |                     |                    |                    |       |    |   |        |   |    |        |    |     |        |    |     |       |      |      |
| bfl-mir-10c<br>ortholog at<br>Sc0000000<br>bp 2027699-<br>2027621<br>(- strand)   | 5' arm:<br>UACCCUGUAGAUCGGACUUGUGA<br><br>3' arm:<br>(low abundance)     | <table border="1"> <caption>Abundance profile for bfl-mir-10c</caption> <thead> <tr> <th>Developmental stage</th> <th>5' arm miRNA (ppm)</th> <th>3' arm miRNA (ppm)</th> </tr> </thead> <tbody> <tr> <td>8 hpf</td> <td>0</td> <td>0</td> </tr> <tr> <td>15 hpf</td> <td>0</td> <td>0</td> </tr> <tr> <td>36 hpf</td> <td>0</td> <td>0</td> </tr> <tr> <td>60 hpf</td> <td>0</td> <td>0</td> </tr> <tr> <td>Adult</td> <td>1500</td> <td>5000</td> </tr> </tbody> </table> | Developmental stage | 5' arm miRNA (ppm) | 3' arm miRNA (ppm) | 8 hpf | 0  | 0 | 15 hpf | 0 | 0  | 36 hpf | 0  | 0   | 60 hpf | 0  | 0   | Adult | 1500 | 5000 |
| Developmental stage                                                               | 5' arm miRNA (ppm)                                                       | 3' arm miRNA (ppm)                                                                                                                                                                                                                                                                                                                                                                                                                                                          |                     |                    |                    |       |    |   |        |   |    |        |    |     |        |    |     |       |      |      |
| 8 hpf                                                                             | 0                                                                        | 0                                                                                                                                                                                                                                                                                                                                                                                                                                                                           |                     |                    |                    |       |    |   |        |   |    |        |    |     |        |    |     |       |      |      |
| 15 hpf                                                                            | 0                                                                        | 0                                                                                                                                                                                                                                                                                                                                                                                                                                                                           |                     |                    |                    |       |    |   |        |   |    |        |    |     |        |    |     |       |      |      |
| 36 hpf                                                                            | 0                                                                        | 0                                                                                                                                                                                                                                                                                                                                                                                                                                                                           |                     |                    |                    |       |    |   |        |   |    |        |    |     |        |    |     |       |      |      |
| 60 hpf                                                                            | 0                                                                        | 0                                                                                                                                                                                                                                                                                                                                                                                                                                                                           |                     |                    |                    |       |    |   |        |   |    |        |    |     |        |    |     |       |      |      |
| Adult                                                                             | 1500                                                                     | 5000                                                                                                                                                                                                                                                                                                                                                                                                                                                                        |                     |                    |                    |       |    |   |        |   |    |        |    |     |        |    |     |       |      |      |

(continued on next page)

| Pre-miRNA                                                                        | miRNA sequences                                                         | Abundance profile in development                                                     |
|----------------------------------------------------------------------------------|-------------------------------------------------------------------------|--------------------------------------------------------------------------------------|
| bfl-mir-4869<br>ortholog at<br>Sc0000022<br>bp 2099003-<br>2099080<br>(+ strand) | 5' arm:<br>ACGAUGUUGACUCCGCUCCUCU<br>3' arm:<br>GGGACCUGUAGUCAACACGAGA  | 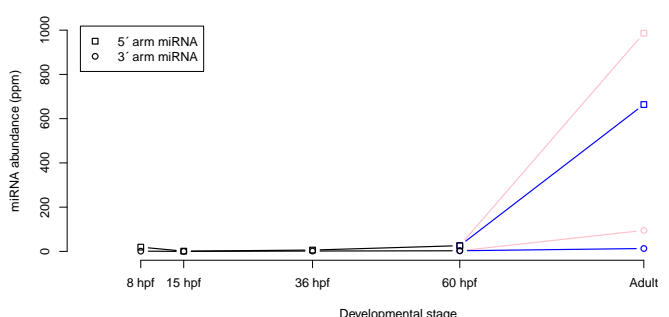   |
| bbe-mir-125a<br>ortholog at<br>Sc0000265<br>bp 98448-98548<br>(+ strand)         | 5' arm:<br>UCCUGAGACCCUAACUUGUGA<br>3' arm:<br>ACAGGUUAGGAUCUUGGGAGCU   |    |
| bbe-mir-4874<br>ortholog at<br>Sc0000043<br>bp 1147175-<br>1147086<br>(- strand) | 5' arm:<br>AGUUUGUAGCAUCCAGCUGAGCU<br>3' arm:<br>CUGGCUGGUUGGUGCAAACAGG |  |
| bbe-mir-281<br>ortholog at<br>Sc0000000<br>bp 9083742-<br>9083658<br>(- strand)  | 5' arm:<br>AGGAGAGCCGUUCUGUGACUGU<br>3' arm:<br>(low abundance)         |  |

(continued on next page)

| Pre-miRNA                                                                                     | miRNA sequences                                                                     | Abundance profile in development                                                                                                                                                                                                                                                                                                                                                                                                                                                                                |                     |                    |                    |       |       |       |        |       |       |        |       |       |        |       |        |       |       |       |
|-----------------------------------------------------------------------------------------------|-------------------------------------------------------------------------------------|-----------------------------------------------------------------------------------------------------------------------------------------------------------------------------------------------------------------------------------------------------------------------------------------------------------------------------------------------------------------------------------------------------------------------------------------------------------------------------------------------------------------|---------------------|--------------------|--------------------|-------|-------|-------|--------|-------|-------|--------|-------|-------|--------|-------|--------|-------|-------|-------|
| <p>bbe-mir-92a-2<br/>ortholog at<br/>Sc0000007<br/>bp 4735603-<br/>4735697<br/>(+ strand)</p> | <p>5' arm:<br/>AGGCCAGGAUUGGUGGCAAUGCC</p> <p>3' arm:<br/>UAUUGCACUUGUCCCGCCUUU</p> | <table border="1"> <caption>Abundance profile for bbe-mir-92a-2</caption> <thead> <tr> <th>Developmental stage</th> <th>5' arm miRNA (ppm)</th> <th>3' arm miRNA (ppm)</th> </tr> </thead> <tbody> <tr> <td>8 hpf</td> <td>~10</td> <td>~650</td> </tr> <tr> <td>15 hpf</td> <td>~10</td> <td>~100</td> </tr> <tr> <td>36 hpf</td> <td>~10</td> <td>~200</td> </tr> <tr> <td>60 hpf</td> <td>~10</td> <td>~400</td> </tr> <tr> <td>Adult</td> <td>~10</td> <td>~250</td> </tr> </tbody> </table>                | Developmental stage | 5' arm miRNA (ppm) | 3' arm miRNA (ppm) | 8 hpf | ~10   | ~650  | 15 hpf | ~10   | ~100  | 36 hpf | ~10   | ~200  | 60 hpf | ~10   | ~400   | Adult | ~10   | ~250  |
| Developmental stage                                                                           | 5' arm miRNA (ppm)                                                                  | 3' arm miRNA (ppm)                                                                                                                                                                                                                                                                                                                                                                                                                                                                                              |                     |                    |                    |       |       |       |        |       |       |        |       |       |        |       |        |       |       |       |
| 8 hpf                                                                                         | ~10                                                                                 | ~650                                                                                                                                                                                                                                                                                                                                                                                                                                                                                                            |                     |                    |                    |       |       |       |        |       |       |        |       |       |        |       |        |       |       |       |
| 15 hpf                                                                                        | ~10                                                                                 | ~100                                                                                                                                                                                                                                                                                                                                                                                                                                                                                                            |                     |                    |                    |       |       |       |        |       |       |        |       |       |        |       |        |       |       |       |
| 36 hpf                                                                                        | ~10                                                                                 | ~200                                                                                                                                                                                                                                                                                                                                                                                                                                                                                                            |                     |                    |                    |       |       |       |        |       |       |        |       |       |        |       |        |       |       |       |
| 60 hpf                                                                                        | ~10                                                                                 | ~400                                                                                                                                                                                                                                                                                                                                                                                                                                                                                                            |                     |                    |                    |       |       |       |        |       |       |        |       |       |        |       |        |       |       |       |
| Adult                                                                                         | ~10                                                                                 | ~250                                                                                                                                                                                                                                                                                                                                                                                                                                                                                                            |                     |                    |                    |       |       |       |        |       |       |        |       |       |        |       |        |       |       |       |
| <p>bbe-mir-2056<br/>ortholog at<br/>Sc0000086 bp<br/>322130-322049<br/>(- strand)</p>         | <p>5' arm:<br/>CAGGUAUGUCUGCGGUGAGGCU</p> <p>3' arm:<br/>UUUCACUGUAGAUCUACCUGCG</p> | <table border="1"> <caption>Abundance profile for bbe-mir-2056</caption> <thead> <tr> <th>Developmental stage</th> <th>5' arm miRNA (ppm)</th> <th>3' arm miRNA (ppm)</th> </tr> </thead> <tbody> <tr> <td>8 hpf</td> <td>~1000</td> <td>~1000</td> </tr> <tr> <td>15 hpf</td> <td>~1000</td> <td>~1000</td> </tr> <tr> <td>36 hpf</td> <td>~1000</td> <td>~2000</td> </tr> <tr> <td>60 hpf</td> <td>~1000</td> <td>~25000</td> </tr> <tr> <td>Adult</td> <td>~1000</td> <td>~1000</td> </tr> </tbody> </table> | Developmental stage | 5' arm miRNA (ppm) | 3' arm miRNA (ppm) | 8 hpf | ~1000 | ~1000 | 15 hpf | ~1000 | ~1000 | 36 hpf | ~1000 | ~2000 | 60 hpf | ~1000 | ~25000 | Adult | ~1000 | ~1000 |
| Developmental stage                                                                           | 5' arm miRNA (ppm)                                                                  | 3' arm miRNA (ppm)                                                                                                                                                                                                                                                                                                                                                                                                                                                                                              |                     |                    |                    |       |       |       |        |       |       |        |       |       |        |       |        |       |       |       |
| 8 hpf                                                                                         | ~1000                                                                               | ~1000                                                                                                                                                                                                                                                                                                                                                                                                                                                                                                           |                     |                    |                    |       |       |       |        |       |       |        |       |       |        |       |        |       |       |       |
| 15 hpf                                                                                        | ~1000                                                                               | ~1000                                                                                                                                                                                                                                                                                                                                                                                                                                                                                                           |                     |                    |                    |       |       |       |        |       |       |        |       |       |        |       |        |       |       |       |
| 36 hpf                                                                                        | ~1000                                                                               | ~2000                                                                                                                                                                                                                                                                                                                                                                                                                                                                                                           |                     |                    |                    |       |       |       |        |       |       |        |       |       |        |       |        |       |       |       |
| 60 hpf                                                                                        | ~1000                                                                               | ~25000                                                                                                                                                                                                                                                                                                                                                                                                                                                                                                          |                     |                    |                    |       |       |       |        |       |       |        |       |       |        |       |        |       |       |       |
| Adult                                                                                         | ~1000                                                                               | ~1000                                                                                                                                                                                                                                                                                                                                                                                                                                                                                                           |                     |                    |                    |       |       |       |        |       |       |        |       |       |        |       |        |       |       |       |
| <p>bbe-mir-4880<br/>ortholog at<br/>Sc0000057<br/>bp 1180856-<br/>1180942<br/>(+ strand)</p>  | <p>5' arm:<br/>UUUGCUAUUCGAUGACCAGUGG</p> <p>3' arm:<br/>(low abundance)</p>        | <table border="1"> <caption>Abundance profile for bbe-mir-4880</caption> <thead> <tr> <th>Developmental stage</th> <th>5' arm miRNA (ppm)</th> <th>3' arm miRNA (ppm)</th> </tr> </thead> <tbody> <tr> <td>8 hpf</td> <td>~1</td> <td>~1</td> </tr> <tr> <td>15 hpf</td> <td>~1</td> <td>~1</td> </tr> <tr> <td>36 hpf</td> <td>~10</td> <td>~5</td> </tr> <tr> <td>60 hpf</td> <td>~50</td> <td>~10</td> </tr> <tr> <td>Adult</td> <td>~1</td> <td>~1</td> </tr> </tbody> </table>                             | Developmental stage | 5' arm miRNA (ppm) | 3' arm miRNA (ppm) | 8 hpf | ~1    | ~1    | 15 hpf | ~1    | ~1    | 36 hpf | ~10   | ~5    | 60 hpf | ~50   | ~10    | Adult | ~1    | ~1    |
| Developmental stage                                                                           | 5' arm miRNA (ppm)                                                                  | 3' arm miRNA (ppm)                                                                                                                                                                                                                                                                                                                                                                                                                                                                                              |                     |                    |                    |       |       |       |        |       |       |        |       |       |        |       |        |       |       |       |
| 8 hpf                                                                                         | ~1                                                                                  | ~1                                                                                                                                                                                                                                                                                                                                                                                                                                                                                                              |                     |                    |                    |       |       |       |        |       |       |        |       |       |        |       |        |       |       |       |
| 15 hpf                                                                                        | ~1                                                                                  | ~1                                                                                                                                                                                                                                                                                                                                                                                                                                                                                                              |                     |                    |                    |       |       |       |        |       |       |        |       |       |        |       |        |       |       |       |
| 36 hpf                                                                                        | ~10                                                                                 | ~5                                                                                                                                                                                                                                                                                                                                                                                                                                                                                                              |                     |                    |                    |       |       |       |        |       |       |        |       |       |        |       |        |       |       |       |
| 60 hpf                                                                                        | ~50                                                                                 | ~10                                                                                                                                                                                                                                                                                                                                                                                                                                                                                                             |                     |                    |                    |       |       |       |        |       |       |        |       |       |        |       |        |       |       |       |
| Adult                                                                                         | ~1                                                                                  | ~1                                                                                                                                                                                                                                                                                                                                                                                                                                                                                                              |                     |                    |                    |       |       |       |        |       |       |        |       |       |        |       |        |       |       |       |
| <p>bbe-mir-31<br/>ortholog at<br/>Sc0000399 bp<br/>174399-174498<br/>(+ strand)</p>           | <p>5' arm:<br/>UGGCAAGAUGUUGGCAUAGCUG</p> <p>3' arm:<br/>(low abundance)</p>        | <table border="1"> <caption>Abundance profile for bbe-mir-31</caption> <thead> <tr> <th>Developmental stage</th> <th>5' arm miRNA (ppm)</th> <th>3' arm miRNA (ppm)</th> </tr> </thead> <tbody> <tr> <td>8 hpf</td> <td>~10</td> <td>~10</td> </tr> <tr> <td>15 hpf</td> <td>~10</td> <td>~10</td> </tr> <tr> <td>36 hpf</td> <td>~100</td> <td>~100</td> </tr> <tr> <td>60 hpf</td> <td>~300</td> <td>~300</td> </tr> <tr> <td>Adult</td> <td>~900</td> <td>~250</td> </tr> </tbody> </table>                  | Developmental stage | 5' arm miRNA (ppm) | 3' arm miRNA (ppm) | 8 hpf | ~10   | ~10   | 15 hpf | ~10   | ~10   | 36 hpf | ~100  | ~100  | 60 hpf | ~300  | ~300   | Adult | ~900  | ~250  |
| Developmental stage                                                                           | 5' arm miRNA (ppm)                                                                  | 3' arm miRNA (ppm)                                                                                                                                                                                                                                                                                                                                                                                                                                                                                              |                     |                    |                    |       |       |       |        |       |       |        |       |       |        |       |        |       |       |       |
| 8 hpf                                                                                         | ~10                                                                                 | ~10                                                                                                                                                                                                                                                                                                                                                                                                                                                                                                             |                     |                    |                    |       |       |       |        |       |       |        |       |       |        |       |        |       |       |       |
| 15 hpf                                                                                        | ~10                                                                                 | ~10                                                                                                                                                                                                                                                                                                                                                                                                                                                                                                             |                     |                    |                    |       |       |       |        |       |       |        |       |       |        |       |        |       |       |       |
| 36 hpf                                                                                        | ~100                                                                                | ~100                                                                                                                                                                                                                                                                                                                                                                                                                                                                                                            |                     |                    |                    |       |       |       |        |       |       |        |       |       |        |       |        |       |       |       |
| 60 hpf                                                                                        | ~300                                                                                | ~300                                                                                                                                                                                                                                                                                                                                                                                                                                                                                                            |                     |                    |                    |       |       |       |        |       |       |        |       |       |        |       |        |       |       |       |
| Adult                                                                                         | ~900                                                                                | ~250                                                                                                                                                                                                                                                                                                                                                                                                                                                                                                            |                     |                    |                    |       |       |       |        |       |       |        |       |       |        |       |        |       |       |       |

(continued on next page)

| Pre-miRNA                                                                                    | miRNA sequences                                                                      | Abundance profile in development                                                                                                                                                                                                                                                                                                                                                                                                                                                              |                     |                    |                    |       |    |      |        |      |      |        |      |      |        |      |      |       |      |       |
|----------------------------------------------------------------------------------------------|--------------------------------------------------------------------------------------|-----------------------------------------------------------------------------------------------------------------------------------------------------------------------------------------------------------------------------------------------------------------------------------------------------------------------------------------------------------------------------------------------------------------------------------------------------------------------------------------------|---------------------|--------------------|--------------------|-------|----|------|--------|------|------|--------|------|------|--------|------|------|-------|------|-------|
| <p>bfl-mir-200b<br/>ortholog at<br/>Sc0000010<br/>bp 3877902-<br/>3877999<br/>(+ strand)</p> | <p>5' arm:<br/>(low abundance)</p> <p>3' arm:<br/>UAAUACUGUCUGGUA AUGAUGU</p>        | <table border="1"> <caption>Abundance profile for bfl-mir-200b</caption> <thead> <tr> <th>Developmental stage</th> <th>5' arm miRNA (ppm)</th> <th>3' arm miRNA (ppm)</th> </tr> </thead> <tbody> <tr> <td>8 hpf</td> <td>~1</td> <td>~10</td> </tr> <tr> <td>15 hpf</td> <td>~0.5</td> <td>~0.5</td> </tr> <tr> <td>36 hpf</td> <td>~0.5</td> <td>~7</td> </tr> <tr> <td>60 hpf</td> <td>~0.5</td> <td>~30</td> </tr> <tr> <td>Adult</td> <td>~0.5</td> <td>~10</td> </tr> </tbody> </table> | Developmental stage | 5' arm miRNA (ppm) | 3' arm miRNA (ppm) | 8 hpf | ~1 | ~10  | 15 hpf | ~0.5 | ~0.5 | 36 hpf | ~0.5 | ~7   | 60 hpf | ~0.5 | ~30  | Adult | ~0.5 | ~10   |
| Developmental stage                                                                          | 5' arm miRNA (ppm)                                                                   | 3' arm miRNA (ppm)                                                                                                                                                                                                                                                                                                                                                                                                                                                                            |                     |                    |                    |       |    |      |        |      |      |        |      |      |        |      |      |       |      |       |
| 8 hpf                                                                                        | ~1                                                                                   | ~10                                                                                                                                                                                                                                                                                                                                                                                                                                                                                           |                     |                    |                    |       |    |      |        |      |      |        |      |      |        |      |      |       |      |       |
| 15 hpf                                                                                       | ~0.5                                                                                 | ~0.5                                                                                                                                                                                                                                                                                                                                                                                                                                                                                          |                     |                    |                    |       |    |      |        |      |      |        |      |      |        |      |      |       |      |       |
| 36 hpf                                                                                       | ~0.5                                                                                 | ~7                                                                                                                                                                                                                                                                                                                                                                                                                                                                                            |                     |                    |                    |       |    |      |        |      |      |        |      |      |        |      |      |       |      |       |
| 60 hpf                                                                                       | ~0.5                                                                                 | ~30                                                                                                                                                                                                                                                                                                                                                                                                                                                                                           |                     |                    |                    |       |    |      |        |      |      |        |      |      |        |      |      |       |      |       |
| Adult                                                                                        | ~0.5                                                                                 | ~10                                                                                                                                                                                                                                                                                                                                                                                                                                                                                           |                     |                    |                    |       |    |      |        |      |      |        |      |      |        |      |      |       |      |       |
| <p>bfl-mir-2071<br/>ortholog at<br/>Sc0000288 bp<br/>188813-188893<br/>(+ strand)</p>        | <p>5' arm:<br/>AUGC GGUGCGGUGGUAGCAACCG</p> <p>3' arm:<br/>AUUGUACACCGCGCCGCAAAG</p> | <table border="1"> <caption>Abundance profile for bfl-mir-2071</caption> <thead> <tr> <th>Developmental stage</th> <th>5' arm miRNA (ppm)</th> <th>3' arm miRNA (ppm)</th> </tr> </thead> <tbody> <tr> <td>8 hpf</td> <td>~0</td> <td>~0</td> </tr> <tr> <td>15 hpf</td> <td>~0</td> <td>~0</td> </tr> <tr> <td>36 hpf</td> <td>~0</td> <td>~0</td> </tr> <tr> <td>60 hpf</td> <td>~0</td> <td>~0</td> </tr> <tr> <td>Adult</td> <td>~0</td> <td>~1700</td> </tr> </tbody> </table>           | Developmental stage | 5' arm miRNA (ppm) | 3' arm miRNA (ppm) | 8 hpf | ~0 | ~0   | 15 hpf | ~0   | ~0   | 36 hpf | ~0   | ~0   | 60 hpf | ~0   | ~0   | Adult | ~0   | ~1700 |
| Developmental stage                                                                          | 5' arm miRNA (ppm)                                                                   | 3' arm miRNA (ppm)                                                                                                                                                                                                                                                                                                                                                                                                                                                                            |                     |                    |                    |       |    |      |        |      |      |        |      |      |        |      |      |       |      |       |
| 8 hpf                                                                                        | ~0                                                                                   | ~0                                                                                                                                                                                                                                                                                                                                                                                                                                                                                            |                     |                    |                    |       |    |      |        |      |      |        |      |      |        |      |      |       |      |       |
| 15 hpf                                                                                       | ~0                                                                                   | ~0                                                                                                                                                                                                                                                                                                                                                                                                                                                                                            |                     |                    |                    |       |    |      |        |      |      |        |      |      |        |      |      |       |      |       |
| 36 hpf                                                                                       | ~0                                                                                   | ~0                                                                                                                                                                                                                                                                                                                                                                                                                                                                                            |                     |                    |                    |       |    |      |        |      |      |        |      |      |        |      |      |       |      |       |
| 60 hpf                                                                                       | ~0                                                                                   | ~0                                                                                                                                                                                                                                                                                                                                                                                                                                                                                            |                     |                    |                    |       |    |      |        |      |      |        |      |      |        |      |      |       |      |       |
| Adult                                                                                        | ~0                                                                                   | ~1700                                                                                                                                                                                                                                                                                                                                                                                                                                                                                         |                     |                    |                    |       |    |      |        |      |      |        |      |      |        |      |      |       |      |       |
| <p>bfl-mir-4865<br/>ortholog at<br/>Sc0000063 bp<br/>315717-315798<br/>(+ strand)</p>        | <p>5' arm:<br/>(low abundance)</p> <p>3' arm:<br/>UGUAGAGAGAGUGACAGGUUGU</p>         | <table border="1"> <caption>Abundance profile for bfl-mir-4865</caption> <thead> <tr> <th>Developmental stage</th> <th>5' arm miRNA (ppm)</th> <th>3' arm miRNA (ppm)</th> </tr> </thead> <tbody> <tr> <td>8 hpf</td> <td>~0</td> <td>~10</td> </tr> <tr> <td>15 hpf</td> <td>~0</td> <td>~0</td> </tr> <tr> <td>36 hpf</td> <td>~0</td> <td>~30</td> </tr> <tr> <td>60 hpf</td> <td>~0</td> <td>~270</td> </tr> <tr> <td>Adult</td> <td>~0</td> <td>~60</td> </tr> </tbody> </table>         | Developmental stage | 5' arm miRNA (ppm) | 3' arm miRNA (ppm) | 8 hpf | ~0 | ~10  | 15 hpf | ~0   | ~0   | 36 hpf | ~0   | ~30  | 60 hpf | ~0   | ~270 | Adult | ~0   | ~60   |
| Developmental stage                                                                          | 5' arm miRNA (ppm)                                                                   | 3' arm miRNA (ppm)                                                                                                                                                                                                                                                                                                                                                                                                                                                                            |                     |                    |                    |       |    |      |        |      |      |        |      |      |        |      |      |       |      |       |
| 8 hpf                                                                                        | ~0                                                                                   | ~10                                                                                                                                                                                                                                                                                                                                                                                                                                                                                           |                     |                    |                    |       |    |      |        |      |      |        |      |      |        |      |      |       |      |       |
| 15 hpf                                                                                       | ~0                                                                                   | ~0                                                                                                                                                                                                                                                                                                                                                                                                                                                                                            |                     |                    |                    |       |    |      |        |      |      |        |      |      |        |      |      |       |      |       |
| 36 hpf                                                                                       | ~0                                                                                   | ~30                                                                                                                                                                                                                                                                                                                                                                                                                                                                                           |                     |                    |                    |       |    |      |        |      |      |        |      |      |        |      |      |       |      |       |
| 60 hpf                                                                                       | ~0                                                                                   | ~270                                                                                                                                                                                                                                                                                                                                                                                                                                                                                          |                     |                    |                    |       |    |      |        |      |      |        |      |      |        |      |      |       |      |       |
| Adult                                                                                        | ~0                                                                                   | ~60                                                                                                                                                                                                                                                                                                                                                                                                                                                                                           |                     |                    |                    |       |    |      |        |      |      |        |      |      |        |      |      |       |      |       |
| <p>bbe-mir-200c<br/>ortholog at<br/>Sc0000010<br/>bp 3875272-<br/>3875359<br/>(+ strand)</p> | <p>5' arm:<br/>(low abundance)</p> <p>3' arm:<br/>UAACACUGUCUGGUA AUGAUG</p>         | <table border="1"> <caption>Abundance profile for bbe-mir-200c</caption> <thead> <tr> <th>Developmental stage</th> <th>5' arm miRNA (ppm)</th> <th>3' arm miRNA (ppm)</th> </tr> </thead> <tbody> <tr> <td>8 hpf</td> <td>~0</td> <td>~300</td> </tr> <tr> <td>15 hpf</td> <td>~0</td> <td>~50</td> </tr> <tr> <td>36 hpf</td> <td>~0</td> <td>~200</td> </tr> <tr> <td>60 hpf</td> <td>~0</td> <td>~900</td> </tr> <tr> <td>Adult</td> <td>~0</td> <td>~500</td> </tr> </tbody> </table>     | Developmental stage | 5' arm miRNA (ppm) | 3' arm miRNA (ppm) | 8 hpf | ~0 | ~300 | 15 hpf | ~0   | ~50  | 36 hpf | ~0   | ~200 | 60 hpf | ~0   | ~900 | Adult | ~0   | ~500  |
| Developmental stage                                                                          | 5' arm miRNA (ppm)                                                                   | 3' arm miRNA (ppm)                                                                                                                                                                                                                                                                                                                                                                                                                                                                            |                     |                    |                    |       |    |      |        |      |      |        |      |      |        |      |      |       |      |       |
| 8 hpf                                                                                        | ~0                                                                                   | ~300                                                                                                                                                                                                                                                                                                                                                                                                                                                                                          |                     |                    |                    |       |    |      |        |      |      |        |      |      |        |      |      |       |      |       |
| 15 hpf                                                                                       | ~0                                                                                   | ~50                                                                                                                                                                                                                                                                                                                                                                                                                                                                                           |                     |                    |                    |       |    |      |        |      |      |        |      |      |        |      |      |       |      |       |
| 36 hpf                                                                                       | ~0                                                                                   | ~200                                                                                                                                                                                                                                                                                                                                                                                                                                                                                          |                     |                    |                    |       |    |      |        |      |      |        |      |      |        |      |      |       |      |       |
| 60 hpf                                                                                       | ~0                                                                                   | ~900                                                                                                                                                                                                                                                                                                                                                                                                                                                                                          |                     |                    |                    |       |    |      |        |      |      |        |      |      |        |      |      |       |      |       |
| Adult                                                                                        | ~0                                                                                   | ~500                                                                                                                                                                                                                                                                                                                                                                                                                                                                                          |                     |                    |                    |       |    |      |        |      |      |        |      |      |        |      |      |       |      |       |

(continued on next page)

| Pre-miRNA                                                                                    | miRNA sequences                                                                       | Abundance profile in development                                                                                                                                                                                                                                                                                                                                                                                                                                                                  |                     |                    |                    |       |      |      |        |     |     |        |      |      |        |      |      |       |       |       |
|----------------------------------------------------------------------------------------------|---------------------------------------------------------------------------------------|---------------------------------------------------------------------------------------------------------------------------------------------------------------------------------------------------------------------------------------------------------------------------------------------------------------------------------------------------------------------------------------------------------------------------------------------------------------------------------------------------|---------------------|--------------------|--------------------|-------|------|------|--------|-----|-----|--------|------|------|--------|------|------|-------|-------|-------|
| <p>bfl-mir-29a<br/>ortholog at<br/>Sc0000043<br/>bp 1849481-<br/>1849575<br/>(+ strand)</p>  | <p>5' arm:<br/>GCUGAAUUUCAGUUGGUGCUAGA<br/><br/>3' arm:<br/>(low abundance)</p>       | <table border="1"> <caption>Abundance profile for bfl-mir-29a</caption> <thead> <tr> <th>Developmental stage</th> <th>5' arm miRNA (ppm)</th> <th>3' arm miRNA (ppm)</th> </tr> </thead> <tbody> <tr> <td>8 hpf</td> <td>~20</td> <td>~10</td> </tr> <tr> <td>15 hpf</td> <td>~10</td> <td>~5</td> </tr> <tr> <td>36 hpf</td> <td>~20</td> <td>~10</td> </tr> <tr> <td>60 hpf</td> <td>~300</td> <td>~300</td> </tr> <tr> <td>Adult</td> <td>~50</td> <td>~10</td> </tr> </tbody> </table>        | Developmental stage | 5' arm miRNA (ppm) | 3' arm miRNA (ppm) | 8 hpf | ~20  | ~10  | 15 hpf | ~10 | ~5  | 36 hpf | ~20  | ~10  | 60 hpf | ~300 | ~300 | Adult | ~50   | ~10   |
| Developmental stage                                                                          | 5' arm miRNA (ppm)                                                                    | 3' arm miRNA (ppm)                                                                                                                                                                                                                                                                                                                                                                                                                                                                                |                     |                    |                    |       |      |      |        |     |     |        |      |      |        |      |      |       |       |       |
| 8 hpf                                                                                        | ~20                                                                                   | ~10                                                                                                                                                                                                                                                                                                                                                                                                                                                                                               |                     |                    |                    |       |      |      |        |     |     |        |      |      |        |      |      |       |       |       |
| 15 hpf                                                                                       | ~10                                                                                   | ~5                                                                                                                                                                                                                                                                                                                                                                                                                                                                                                |                     |                    |                    |       |      |      |        |     |     |        |      |      |        |      |      |       |       |       |
| 36 hpf                                                                                       | ~20                                                                                   | ~10                                                                                                                                                                                                                                                                                                                                                                                                                                                                                               |                     |                    |                    |       |      |      |        |     |     |        |      |      |        |      |      |       |       |       |
| 60 hpf                                                                                       | ~300                                                                                  | ~300                                                                                                                                                                                                                                                                                                                                                                                                                                                                                              |                     |                    |                    |       |      |      |        |     |     |        |      |      |        |      |      |       |       |       |
| Adult                                                                                        | ~50                                                                                   | ~10                                                                                                                                                                                                                                                                                                                                                                                                                                                                                               |                     |                    |                    |       |      |      |        |     |     |        |      |      |        |      |      |       |       |       |
| <p>bbe-mir-2058<br/>ortholog at<br/>Sc0000110 bp<br/>921627-921549<br/>(- strand)</p>        | <p>5' arm:<br/>UGAGAAGUAAGACUACCAUCCCGU<br/><br/>3' arm:<br/>(low abundance)</p>      | <table border="1"> <caption>Abundance profile for bbe-mir-2058</caption> <thead> <tr> <th>Developmental stage</th> <th>5' arm miRNA (ppm)</th> <th>3' arm miRNA (ppm)</th> </tr> </thead> <tbody> <tr> <td>8 hpf</td> <td>~10</td> <td>~5</td> </tr> <tr> <td>15 hpf</td> <td>~10</td> <td>~5</td> </tr> <tr> <td>36 hpf</td> <td>~10</td> <td>~5</td> </tr> <tr> <td>60 hpf</td> <td>~10</td> <td>~5</td> </tr> <tr> <td>Adult</td> <td>~700</td> <td>~150</td> </tr> </tbody> </table>          | Developmental stage | 5' arm miRNA (ppm) | 3' arm miRNA (ppm) | 8 hpf | ~10  | ~5   | 15 hpf | ~10 | ~5  | 36 hpf | ~10  | ~5   | 60 hpf | ~10  | ~5   | Adult | ~700  | ~150  |
| Developmental stage                                                                          | 5' arm miRNA (ppm)                                                                    | 3' arm miRNA (ppm)                                                                                                                                                                                                                                                                                                                                                                                                                                                                                |                     |                    |                    |       |      |      |        |     |     |        |      |      |        |      |      |       |       |       |
| 8 hpf                                                                                        | ~10                                                                                   | ~5                                                                                                                                                                                                                                                                                                                                                                                                                                                                                                |                     |                    |                    |       |      |      |        |     |     |        |      |      |        |      |      |       |       |       |
| 15 hpf                                                                                       | ~10                                                                                   | ~5                                                                                                                                                                                                                                                                                                                                                                                                                                                                                                |                     |                    |                    |       |      |      |        |     |     |        |      |      |        |      |      |       |       |       |
| 36 hpf                                                                                       | ~10                                                                                   | ~5                                                                                                                                                                                                                                                                                                                                                                                                                                                                                                |                     |                    |                    |       |      |      |        |     |     |        |      |      |        |      |      |       |       |       |
| 60 hpf                                                                                       | ~10                                                                                   | ~5                                                                                                                                                                                                                                                                                                                                                                                                                                                                                                |                     |                    |                    |       |      |      |        |     |     |        |      |      |        |      |      |       |       |       |
| Adult                                                                                        | ~700                                                                                  | ~150                                                                                                                                                                                                                                                                                                                                                                                                                                                                                              |                     |                    |                    |       |      |      |        |     |     |        |      |      |        |      |      |       |       |       |
| <p>bfl-let-7a-2<br/>ortholog at<br/>Sc0000265 bp<br/>98758-98852<br/>(+ strand)</p>          | <p>5' arm:<br/>UGAGGUAGUAGGUUGUAUAGUU<br/><br/>3' arm:<br/>CUGUGCAACCUGCUAGCUCUCC</p> | <table border="1"> <caption>Abundance profile for bfl-let-7a-2</caption> <thead> <tr> <th>Developmental stage</th> <th>5' arm miRNA (ppm)</th> <th>3' arm miRNA (ppm)</th> </tr> </thead> <tbody> <tr> <td>8 hpf</td> <td>~100</td> <td>~50</td> </tr> <tr> <td>15 hpf</td> <td>~50</td> <td>~20</td> </tr> <tr> <td>36 hpf</td> <td>~100</td> <td>~50</td> </tr> <tr> <td>60 hpf</td> <td>~100</td> <td>~50</td> </tr> <tr> <td>Adult</td> <td>~2500</td> <td>~1500</td> </tr> </tbody> </table> | Developmental stage | 5' arm miRNA (ppm) | 3' arm miRNA (ppm) | 8 hpf | ~100 | ~50  | 15 hpf | ~50 | ~20 | 36 hpf | ~100 | ~50  | 60 hpf | ~100 | ~50  | Adult | ~2500 | ~1500 |
| Developmental stage                                                                          | 5' arm miRNA (ppm)                                                                    | 3' arm miRNA (ppm)                                                                                                                                                                                                                                                                                                                                                                                                                                                                                |                     |                    |                    |       |      |      |        |     |     |        |      |      |        |      |      |       |       |       |
| 8 hpf                                                                                        | ~100                                                                                  | ~50                                                                                                                                                                                                                                                                                                                                                                                                                                                                                               |                     |                    |                    |       |      |      |        |     |     |        |      |      |        |      |      |       |       |       |
| 15 hpf                                                                                       | ~50                                                                                   | ~20                                                                                                                                                                                                                                                                                                                                                                                                                                                                                               |                     |                    |                    |       |      |      |        |     |     |        |      |      |        |      |      |       |       |       |
| 36 hpf                                                                                       | ~100                                                                                  | ~50                                                                                                                                                                                                                                                                                                                                                                                                                                                                                               |                     |                    |                    |       |      |      |        |     |     |        |      |      |        |      |      |       |       |       |
| 60 hpf                                                                                       | ~100                                                                                  | ~50                                                                                                                                                                                                                                                                                                                                                                                                                                                                                               |                     |                    |                    |       |      |      |        |     |     |        |      |      |        |      |      |       |       |       |
| Adult                                                                                        | ~2500                                                                                 | ~1500                                                                                                                                                                                                                                                                                                                                                                                                                                                                                             |                     |                    |                    |       |      |      |        |     |     |        |      |      |        |      |      |       |       |       |
| <p>bfl-mir-200c<br/>ortholog at<br/>Sc0000010<br/>bp 3875267-<br/>3875358<br/>(+ strand)</p> | <p>5' arm:<br/>(low abundance)<br/><br/>3' arm:<br/>UAACACUGUCUGGUAUAUGAUG</p>        | <table border="1"> <caption>Abundance profile for bfl-mir-200c</caption> <thead> <tr> <th>Developmental stage</th> <th>5' arm miRNA (ppm)</th> <th>3' arm miRNA (ppm)</th> </tr> </thead> <tbody> <tr> <td>8 hpf</td> <td>~10</td> <td>~250</td> </tr> <tr> <td>15 hpf</td> <td>~10</td> <td>~50</td> </tr> <tr> <td>36 hpf</td> <td>~10</td> <td>~150</td> </tr> <tr> <td>60 hpf</td> <td>~10</td> <td>~800</td> </tr> <tr> <td>Adult</td> <td>~10</td> <td>~450</td> </tr> </tbody> </table>    | Developmental stage | 5' arm miRNA (ppm) | 3' arm miRNA (ppm) | 8 hpf | ~10  | ~250 | 15 hpf | ~10 | ~50 | 36 hpf | ~10  | ~150 | 60 hpf | ~10  | ~800 | Adult | ~10   | ~450  |
| Developmental stage                                                                          | 5' arm miRNA (ppm)                                                                    | 3' arm miRNA (ppm)                                                                                                                                                                                                                                                                                                                                                                                                                                                                                |                     |                    |                    |       |      |      |        |     |     |        |      |      |        |      |      |       |       |       |
| 8 hpf                                                                                        | ~10                                                                                   | ~250                                                                                                                                                                                                                                                                                                                                                                                                                                                                                              |                     |                    |                    |       |      |      |        |     |     |        |      |      |        |      |      |       |       |       |
| 15 hpf                                                                                       | ~10                                                                                   | ~50                                                                                                                                                                                                                                                                                                                                                                                                                                                                                               |                     |                    |                    |       |      |      |        |     |     |        |      |      |        |      |      |       |       |       |
| 36 hpf                                                                                       | ~10                                                                                   | ~150                                                                                                                                                                                                                                                                                                                                                                                                                                                                                              |                     |                    |                    |       |      |      |        |     |     |        |      |      |        |      |      |       |       |       |
| 60 hpf                                                                                       | ~10                                                                                   | ~800                                                                                                                                                                                                                                                                                                                                                                                                                                                                                              |                     |                    |                    |       |      |      |        |     |     |        |      |      |        |      |      |       |       |       |
| Adult                                                                                        | ~10                                                                                   | ~450                                                                                                                                                                                                                                                                                                                                                                                                                                                                                              |                     |                    |                    |       |      |      |        |     |     |        |      |      |        |      |      |       |       |       |

(continued on next page)

| Pre-miRNA                                                                        | miRNA sequences                                                              | Abundance profile in development                                                     |
|----------------------------------------------------------------------------------|------------------------------------------------------------------------------|--------------------------------------------------------------------------------------|
| bfl-mir-4860<br>ortholog at<br>Sc0000063 bp<br>316331-316404<br>(+ strand)       | 5' arm:<br>UGCCUGUCAACGUCUCUGUACA<br><br>3' arm:<br>UGUAGAGAUUGUGUGACGGGUAGU | 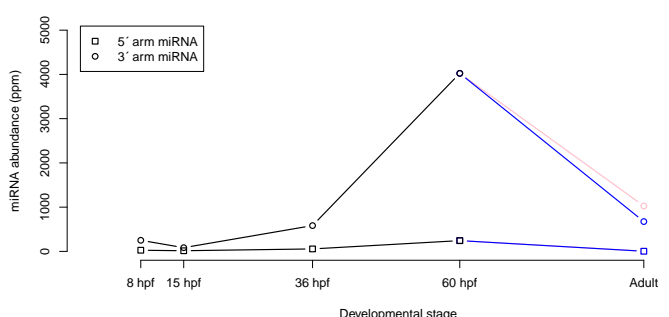   |
| bfl-mir-4864<br>ortholog at<br>Sc0000184 bp<br>79034-79113<br>(+ strand)         | 5' arm:<br>AGGGAGAUCGUCUCGGGCAUACA<br><br>3' arm:<br>UAGCCAGACCUGAUCUCCUGC   |    |
| bfl-mir-4861<br>ortholog at<br>Sc0000005<br>bp 3994270-<br>3994362<br>(+ strand) | 5' arm:<br>AGCCAAUGCGGCAUGUAAAAGGC<br><br>3' arm:<br>UUUACGUGCCACAUUGUCUCCU  |  |
| bfl-mir-2062<br>ortholog at<br>Sc0000099 bp<br>755622-755703<br>(+ strand)       | 5' arm:<br>UGCAACAAUUAUUUCAUCAGUGG<br><br>3' arm:<br>ACUGGUGAAAUGUAGUUGCGUA  |  |

(continued on next page)

| Pre-miRNA                                                                                    | miRNA sequences                                                                      | Abundance profile in development                                                                                                                                                                                                                                                                                                                                                                                                                                                                                     |                     |                    |                    |       |       |        |        |       |        |        |       |        |        |       |         |       |       |        |
|----------------------------------------------------------------------------------------------|--------------------------------------------------------------------------------------|----------------------------------------------------------------------------------------------------------------------------------------------------------------------------------------------------------------------------------------------------------------------------------------------------------------------------------------------------------------------------------------------------------------------------------------------------------------------------------------------------------------------|---------------------|--------------------|--------------------|-------|-------|--------|--------|-------|--------|--------|-------|--------|--------|-------|---------|-------|-------|--------|
| <p>bbe-mir-4859<br/>ortholog at<br/>Sc0000221 bp<br/>303532-303447<br/>(- strand)</p>        | <p>5' arm:<br/>AGCAGCGAGCAUUACGGUCAUU</p> <p>3' arm:<br/>UGACAGUAAUGCCCGCUGACUU</p>  | <table border="1"> <caption>Abundance profile for bbe-mir-4859</caption> <thead> <tr> <th>Developmental stage</th> <th>5' arm miRNA (ppm)</th> <th>3' arm miRNA (ppm)</th> </tr> </thead> <tbody> <tr> <td>8 hpf</td> <td>~40</td> <td>~30</td> </tr> <tr> <td>15 hpf</td> <td>~10</td> <td>~10</td> </tr> <tr> <td>36 hpf</td> <td>~55</td> <td>~85</td> </tr> <tr> <td>60 hpf</td> <td>~60</td> <td>~165</td> </tr> <tr> <td>Adult</td> <td>~10</td> <td>~25</td> </tr> </tbody> </table>                          | Developmental stage | 5' arm miRNA (ppm) | 3' arm miRNA (ppm) | 8 hpf | ~40   | ~30    | 15 hpf | ~10   | ~10    | 36 hpf | ~55   | ~85    | 60 hpf | ~60   | ~165    | Adult | ~10   | ~25    |
| Developmental stage                                                                          | 5' arm miRNA (ppm)                                                                   | 3' arm miRNA (ppm)                                                                                                                                                                                                                                                                                                                                                                                                                                                                                                   |                     |                    |                    |       |       |        |        |       |        |        |       |        |        |       |         |       |       |        |
| 8 hpf                                                                                        | ~40                                                                                  | ~30                                                                                                                                                                                                                                                                                                                                                                                                                                                                                                                  |                     |                    |                    |       |       |        |        |       |        |        |       |        |        |       |         |       |       |        |
| 15 hpf                                                                                       | ~10                                                                                  | ~10                                                                                                                                                                                                                                                                                                                                                                                                                                                                                                                  |                     |                    |                    |       |       |        |        |       |        |        |       |        |        |       |         |       |       |        |
| 36 hpf                                                                                       | ~55                                                                                  | ~85                                                                                                                                                                                                                                                                                                                                                                                                                                                                                                                  |                     |                    |                    |       |       |        |        |       |        |        |       |        |        |       |         |       |       |        |
| 60 hpf                                                                                       | ~60                                                                                  | ~165                                                                                                                                                                                                                                                                                                                                                                                                                                                                                                                 |                     |                    |                    |       |       |        |        |       |        |        |       |        |        |       |         |       |       |        |
| Adult                                                                                        | ~10                                                                                  | ~25                                                                                                                                                                                                                                                                                                                                                                                                                                                                                                                  |                     |                    |                    |       |       |        |        |       |        |        |       |        |        |       |         |       |       |        |
| <p>bfl-mir-4871<br/>ortholog at<br/>Sc0000001<br/>bp 4527403-<br/>4527475<br/>(+ strand)</p> | <p>5' arm:<br/>UCUGAAGUACCUGUUGCCAAAGG</p> <p>3' arm:<br/>UUUGGCACUGGUACUUUGGAGU</p> | <table border="1"> <caption>Abundance profile for bfl-mir-4871</caption> <thead> <tr> <th>Developmental stage</th> <th>5' arm miRNA (ppm)</th> <th>3' arm miRNA (ppm)</th> </tr> </thead> <tbody> <tr> <td>8 hpf</td> <td>~5000</td> <td>~15000</td> </tr> <tr> <td>15 hpf</td> <td>~5000</td> <td>~10000</td> </tr> <tr> <td>36 hpf</td> <td>~5000</td> <td>~35000</td> </tr> <tr> <td>60 hpf</td> <td>~5000</td> <td>~110000</td> </tr> <tr> <td>Adult</td> <td>~5000</td> <td>~40000</td> </tr> </tbody> </table> | Developmental stage | 5' arm miRNA (ppm) | 3' arm miRNA (ppm) | 8 hpf | ~5000 | ~15000 | 15 hpf | ~5000 | ~10000 | 36 hpf | ~5000 | ~35000 | 60 hpf | ~5000 | ~110000 | Adult | ~5000 | ~40000 |
| Developmental stage                                                                          | 5' arm miRNA (ppm)                                                                   | 3' arm miRNA (ppm)                                                                                                                                                                                                                                                                                                                                                                                                                                                                                                   |                     |                    |                    |       |       |        |        |       |        |        |       |        |        |       |         |       |       |        |
| 8 hpf                                                                                        | ~5000                                                                                | ~15000                                                                                                                                                                                                                                                                                                                                                                                                                                                                                                               |                     |                    |                    |       |       |        |        |       |        |        |       |        |        |       |         |       |       |        |
| 15 hpf                                                                                       | ~5000                                                                                | ~10000                                                                                                                                                                                                                                                                                                                                                                                                                                                                                                               |                     |                    |                    |       |       |        |        |       |        |        |       |        |        |       |         |       |       |        |
| 36 hpf                                                                                       | ~5000                                                                                | ~35000                                                                                                                                                                                                                                                                                                                                                                                                                                                                                                               |                     |                    |                    |       |       |        |        |       |        |        |       |        |        |       |         |       |       |        |
| 60 hpf                                                                                       | ~5000                                                                                | ~110000                                                                                                                                                                                                                                                                                                                                                                                                                                                                                                              |                     |                    |                    |       |       |        |        |       |        |        |       |        |        |       |         |       |       |        |
| Adult                                                                                        | ~5000                                                                                | ~40000                                                                                                                                                                                                                                                                                                                                                                                                                                                                                                               |                     |                    |                    |       |       |        |        |       |        |        |       |        |        |       |         |       |       |        |
| <p>bbe-mir-100<br/>ortholog at<br/>Sc0000265 bp<br/>96682-96781<br/>(+ strand)</p>           | <p>5' arm:<br/>AACCCGUGAUAUCCGAACUUGUGU</p> <p>3' arm:<br/>CAAGCUCGUGUCUAUGGGUCU</p> | <table border="1"> <caption>Abundance profile for bbe-mir-100</caption> <thead> <tr> <th>Developmental stage</th> <th>5' arm miRNA (ppm)</th> <th>3' arm miRNA (ppm)</th> </tr> </thead> <tbody> <tr> <td>8 hpf</td> <td>~1800</td> <td>~100</td> </tr> <tr> <td>15 hpf</td> <td>~100</td> <td>~100</td> </tr> <tr> <td>36 hpf</td> <td>~100</td> <td>~100</td> </tr> <tr> <td>60 hpf</td> <td>~200</td> <td>~200</td> </tr> <tr> <td>Adult</td> <td>~200</td> <td>~2300</td> </tr> </tbody> </table>                | Developmental stage | 5' arm miRNA (ppm) | 3' arm miRNA (ppm) | 8 hpf | ~1800 | ~100   | 15 hpf | ~100  | ~100   | 36 hpf | ~100  | ~100   | 60 hpf | ~200  | ~200    | Adult | ~200  | ~2300  |
| Developmental stage                                                                          | 5' arm miRNA (ppm)                                                                   | 3' arm miRNA (ppm)                                                                                                                                                                                                                                                                                                                                                                                                                                                                                                   |                     |                    |                    |       |       |        |        |       |        |        |       |        |        |       |         |       |       |        |
| 8 hpf                                                                                        | ~1800                                                                                | ~100                                                                                                                                                                                                                                                                                                                                                                                                                                                                                                                 |                     |                    |                    |       |       |        |        |       |        |        |       |        |        |       |         |       |       |        |
| 15 hpf                                                                                       | ~100                                                                                 | ~100                                                                                                                                                                                                                                                                                                                                                                                                                                                                                                                 |                     |                    |                    |       |       |        |        |       |        |        |       |        |        |       |         |       |       |        |
| 36 hpf                                                                                       | ~100                                                                                 | ~100                                                                                                                                                                                                                                                                                                                                                                                                                                                                                                                 |                     |                    |                    |       |       |        |        |       |        |        |       |        |        |       |         |       |       |        |
| 60 hpf                                                                                       | ~200                                                                                 | ~200                                                                                                                                                                                                                                                                                                                                                                                                                                                                                                                 |                     |                    |                    |       |       |        |        |       |        |        |       |        |        |       |         |       |       |        |
| Adult                                                                                        | ~200                                                                                 | ~2300                                                                                                                                                                                                                                                                                                                                                                                                                                                                                                                |                     |                    |                    |       |       |        |        |       |        |        |       |        |        |       |         |       |       |        |
| <p>bbe-mir-22<br/>ortholog at<br/>Sc0000015 bp<br/>676722-676797<br/>(+ strand)</p>          | <p>5' arm:<br/>AGCUCUUCACUCGGUAGCUCUG</p> <p>3' arm:<br/>AAGCUGCCAGAUGAAGAGCUGU</p>  | <table border="1"> <caption>Abundance profile for bbe-mir-22</caption> <thead> <tr> <th>Developmental stage</th> <th>5' arm miRNA (ppm)</th> <th>3' arm miRNA (ppm)</th> </tr> </thead> <tbody> <tr> <td>8 hpf</td> <td>~100</td> <td>~100</td> </tr> <tr> <td>15 hpf</td> <td>~100</td> <td>~100</td> </tr> <tr> <td>36 hpf</td> <td>~100</td> <td>~1000</td> </tr> <tr> <td>60 hpf</td> <td>~100</td> <td>~4200</td> </tr> <tr> <td>Adult</td> <td>~100</td> <td>~1500</td> </tr> </tbody> </table>                | Developmental stage | 5' arm miRNA (ppm) | 3' arm miRNA (ppm) | 8 hpf | ~100  | ~100   | 15 hpf | ~100  | ~100   | 36 hpf | ~100  | ~1000  | 60 hpf | ~100  | ~4200   | Adult | ~100  | ~1500  |
| Developmental stage                                                                          | 5' arm miRNA (ppm)                                                                   | 3' arm miRNA (ppm)                                                                                                                                                                                                                                                                                                                                                                                                                                                                                                   |                     |                    |                    |       |       |        |        |       |        |        |       |        |        |       |         |       |       |        |
| 8 hpf                                                                                        | ~100                                                                                 | ~100                                                                                                                                                                                                                                                                                                                                                                                                                                                                                                                 |                     |                    |                    |       |       |        |        |       |        |        |       |        |        |       |         |       |       |        |
| 15 hpf                                                                                       | ~100                                                                                 | ~100                                                                                                                                                                                                                                                                                                                                                                                                                                                                                                                 |                     |                    |                    |       |       |        |        |       |        |        |       |        |        |       |         |       |       |        |
| 36 hpf                                                                                       | ~100                                                                                 | ~1000                                                                                                                                                                                                                                                                                                                                                                                                                                                                                                                |                     |                    |                    |       |       |        |        |       |        |        |       |        |        |       |         |       |       |        |
| 60 hpf                                                                                       | ~100                                                                                 | ~4200                                                                                                                                                                                                                                                                                                                                                                                                                                                                                                                |                     |                    |                    |       |       |        |        |       |        |        |       |        |        |       |         |       |       |        |
| Adult                                                                                        | ~100                                                                                 | ~1500                                                                                                                                                                                                                                                                                                                                                                                                                                                                                                                |                     |                    |                    |       |       |        |        |       |        |        |       |        |        |       |         |       |       |        |

(continued on next page)

| Pre-miRNA                                                                        | miRNA sequences                                                      | Abundance profile in development                                                     |
|----------------------------------------------------------------------------------|----------------------------------------------------------------------|--------------------------------------------------------------------------------------|
| bfl-mir-190<br>ortholog at<br>Sc0000166 bp<br>638463-638558<br>(+ strand)        | 5' arm:<br>UGAUAUGUUUGAUUUUGGUUG<br><br>3' arm:<br>(low abundance)   | 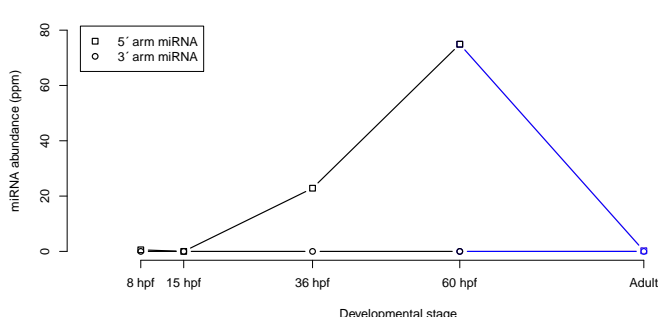   |
| bbe-mir-2057<br>ortholog at<br>Sc0000110 bp<br>922600-922519<br>(- strand)       | 5' arm:<br>UGAGAAGUUAGCCAACCAUCCGG<br><br>3' arm:<br>(low abundance) |    |
| bbe-mir-2061<br>ortholog at<br>Sc0000005<br>bp 2547710-<br>2547629<br>(- strand) | 5' arm:<br>(low abundance)<br><br>3' arm:<br>UUGCAUAGGUACAUUGGUCAGU  |  |
| bfl-mir-124<br>ortholog at<br>Sc0000076 bp<br>963692-963792<br>(+ strand)        | 5' arm:<br>AGUGUUCACGGCGGUCCUAAU<br><br>3' arm:<br>(low abundance)   |  |

(continued on next page)



| Pre-miRNA                                                                                    | miRNA sequences                                                                     | Abundance profile in development |
|----------------------------------------------------------------------------------------------|-------------------------------------------------------------------------------------|----------------------------------|
| <p>bfl-mir-4873<br/>ortholog at<br/>Sc0000015<br/>bp 1919187-<br/>1919110<br/>(- strand)</p> | <p>5' arm:<br/>UGUUCCACCUUCUGAUGUUGUU</p> <p>3' arm:<br/>(low abundance)</p>        |                                  |
| <p>bfl-mir-4891<br/>ortholog at<br/>Sc0000002<br/>bp 2469330-<br/>2469421<br/>(+ strand)</p> | <p>5' arm:<br/>(low abundance)</p> <p>3' arm:<br/>CGUACCAGGACGCUCGUCUGCC</p>        |                                  |
| <p>bfl-mir-2070<br/>ortholog at<br/>Sc0000079<br/>bp 1008448-<br/>1008530<br/>(+ strand)</p> | <p>5' arm:<br/>UUUCCACAGCCUCUACACAUGU</p> <p>3' arm:<br/>AUGUGCAUAAGCUGUGGGAGCA</p> |                                  |
| <p>bfl-mir-2076<br/>ortholog at<br/>Sc0000004<br/>bp 4642959-<br/>4643036<br/>(+ strand)</p> | <p>5' arm:<br/>AAUUGCACUAGAGUGAUUUGUU</p> <p>3' arm:<br/>(low abundance)</p>        |                                  |

(continued on next page)

| Pre-miRNA                                                                         | miRNA sequences                                                            | Abundance profile in development                                                     |
|-----------------------------------------------------------------------------------|----------------------------------------------------------------------------|--------------------------------------------------------------------------------------|
| bbe-mir-133<br>ortholog at<br>Sc0000092 bp<br>690262-690162<br>(- strand)         | 5' arm:<br>AAAGCUGGUAUUUGGAACCA<br><br>3' arm:<br>UUGGUCCCCUUAACCAGCUGU    | 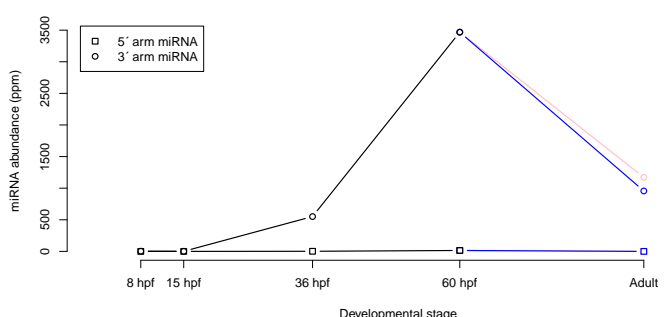   |
| bfl-mir-92b<br>ortholog at<br>Sc0000007<br>bp 2890460-<br>2890560<br>(+ strand)   | 5' arm:<br>AGGUCUGGACAGUUGCAAUCUU<br><br>3' arm:<br>CAUUGCACUCGUCCCGGCCUGA |    |
| bfl-mir-137<br>ortholog at<br>xpSc0039671<br>bp 309878-<br>309778<br>(- strand)   | 5' arm:<br>(low abundance)<br><br>3' arm:<br>UAUUGCUCUGAGAAUACACGUGA       |  |
| bfl-mir-4868b<br>ortholog at<br>Sc0000017<br>bp 1346380-<br>1346293<br>(- strand) | 5' arm:<br>CUCAUCACACCGGAAGCUGUUA<br><br>3' arm:<br>UCAGCUCCAGCUGUGAUGAGUG |  |

(continued on next page)

| Pre-miRNA                                                                         | miRNA sequences                                                            | Abundance profile in development                                                     |
|-----------------------------------------------------------------------------------|----------------------------------------------------------------------------|--------------------------------------------------------------------------------------|
| bfl-mir-242<br>ortholog at<br>Sc0000023 bp<br>500019-499937<br>(- strand)         | 5' arm:<br>UUGCGUAGGCGUUGUGCACACU<br><br>3' arm:<br>(low abundance)        | 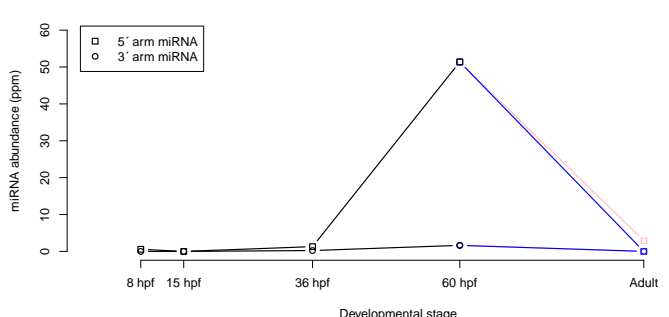   |
| bfl-mir-92d<br>ortholog at<br>Sc0000062 bp<br>529331-529413<br>(+ strand)         | 5' arm:<br>(low abundance)<br><br>3' arm:<br>UAUUGCACUUAUCCUGGCCUGU        |    |
| bfl-mir-4880<br>ortholog at<br>Sc0000057<br>bp 1180852-<br>1180940<br>(+ strand)  | 5' arm:<br>UUUGCUAUUCGAUGACCAGUGG<br><br>3' arm:<br>(low abundance)        |  |
| bbe-mir-92a-1<br>ortholog at<br>Sc0000007<br>bp 4735908-<br>4735986<br>(+ strand) | 5' arm:<br>AGGUCGUGAUAGGCGGCAAUGUU<br><br>3' arm:<br>UAUUGCACUUGUCCCGCCUUU |  |

(continued on next page)

| Pre-miRNA                                                                         | miRNA sequences                                                       | Abundance profile in development                                                     |
|-----------------------------------------------------------------------------------|-----------------------------------------------------------------------|--------------------------------------------------------------------------------------|
| bfl-mir-2058<br>ortholog at<br>Sc0000110 bp<br>921624-921546<br>(- strand)        | 5' arm:<br>UGAGAAGUAAGACUACCAUCCCGU<br><br>3' arm:<br>(low abundance) | 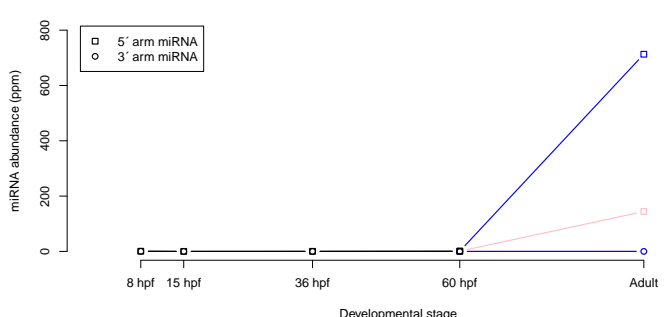   |
| bfl-mir-10b<br>ortholog at<br>Sc0000000<br>bp 1938354-<br>1938254<br>(- strand)   | 5' arm:<br>AACCCUGUGGAUCCGAUCUUGUG<br><br>3' arm:<br>(low abundance)  |    |
| bfl-mir-4856a<br>ortholog at<br>Sc0000022<br>bp 2103002-<br>2103085<br>(+ strand) | 5' arm:<br>ACGCAGUGACGUCAGCGCCUCU<br><br>3' arm:<br>(low abundance)   |  |
| bfl-mir-183<br>ortholog at<br>Sc0000043 bp<br>398562-398462<br>(- strand)         | 5' arm:<br>UAUGGCACUGGUAGAAUUCACUGA<br><br>3' arm:<br>(low abundance) |  |

(continued on next page)

| Pre-miRNA                                                                   | miRNA sequences                                                        | Abundance profile in development                                                     |
|-----------------------------------------------------------------------------|------------------------------------------------------------------------|--------------------------------------------------------------------------------------|
| bbe-mir-2067<br>ortholog at<br>Sc0000082 bp<br>843448-843367<br>(- strand)  | 5' arm:<br>(low abundance)<br>3' arm:<br>AAGCAGCAGUAUGCAAUGGUGA        | 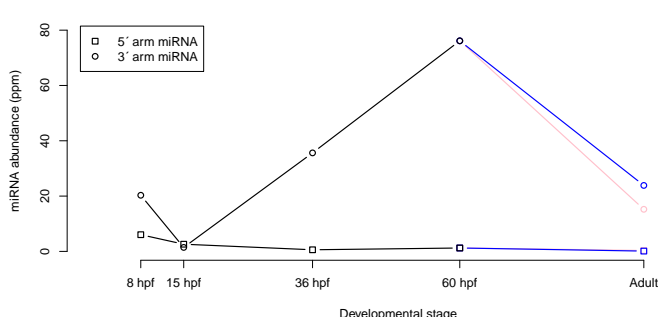   |
| bfl-mir-184<br>ortholog at<br>Sc0000017 bp<br>1306111-1306211<br>(+ strand) | 5' arm:<br>CUUAUCACUUCUCCGCCGAGC<br>3' arm:<br>UGGACGGAGAACUGAUAAGGGCC |    |
| bbe-mir-34a<br>ortholog at<br>Sc0000034 bp<br>210967-210880<br>(- strand)   | 5' arm:<br>CGUUCCUGUGUGCUGCUG<br>3' arm:<br>AGCCACUGUACACUCCCGUA       |  |
| bfl-mir-4904<br>ortholog at<br>Sc0000028 bp<br>432156-432080<br>(- strand)  | 5' arm:<br>UCCCGGAGUCGUUCUAUACGCCG<br>3' arm:<br>(low abundance)       |  |

(continued on next page)

| Pre-miRNA                                                                                    | miRNA sequences                                                                    | Abundance profile in development                                                                                                                                                                                                                                                                                                                                                                                                                                                          |                     |                    |                    |       |     |     |        |     |     |        |     |     |        |      |     |       |     |    |
|----------------------------------------------------------------------------------------------|------------------------------------------------------------------------------------|-------------------------------------------------------------------------------------------------------------------------------------------------------------------------------------------------------------------------------------------------------------------------------------------------------------------------------------------------------------------------------------------------------------------------------------------------------------------------------------------|---------------------|--------------------|--------------------|-------|-----|-----|--------|-----|-----|--------|-----|-----|--------|------|-----|-------|-----|----|
| <p>bfl-mir-4870<br/>ortholog at<br/>Sc0000009<br/>bp 4682265-<br/>4682351<br/>(+ strand)</p> | <p>5' arm:<br/>GAUGUUUGUACUGUCUGUCUGUU</p> <p>3' arm:<br/>(low abundance)</p>      | <table border="1"> <caption>Abundance profile for bfl-mir-4870</caption> <thead> <tr> <th>Developmental stage</th> <th>5' arm miRNA (ppm)</th> <th>3' arm miRNA (ppm)</th> </tr> </thead> <tbody> <tr> <td>8 hpf</td> <td>~1</td> <td>~1</td> </tr> <tr> <td>15 hpf</td> <td>~1</td> <td>~1</td> </tr> <tr> <td>36 hpf</td> <td>~1</td> <td>~1</td> </tr> <tr> <td>60 hpf</td> <td>~1</td> <td>~1</td> </tr> <tr> <td>Adult</td> <td>~65</td> <td>~1</td> </tr> </tbody> </table>         | Developmental stage | 5' arm miRNA (ppm) | 3' arm miRNA (ppm) | 8 hpf | ~1  | ~1  | 15 hpf | ~1  | ~1  | 36 hpf | ~1  | ~1  | 60 hpf | ~1   | ~1  | Adult | ~65 | ~1 |
| Developmental stage                                                                          | 5' arm miRNA (ppm)                                                                 | 3' arm miRNA (ppm)                                                                                                                                                                                                                                                                                                                                                                                                                                                                        |                     |                    |                    |       |     |     |        |     |     |        |     |     |        |      |     |       |     |    |
| 8 hpf                                                                                        | ~1                                                                                 | ~1                                                                                                                                                                                                                                                                                                                                                                                                                                                                                        |                     |                    |                    |       |     |     |        |     |     |        |     |     |        |      |     |       |     |    |
| 15 hpf                                                                                       | ~1                                                                                 | ~1                                                                                                                                                                                                                                                                                                                                                                                                                                                                                        |                     |                    |                    |       |     |     |        |     |     |        |     |     |        |      |     |       |     |    |
| 36 hpf                                                                                       | ~1                                                                                 | ~1                                                                                                                                                                                                                                                                                                                                                                                                                                                                                        |                     |                    |                    |       |     |     |        |     |     |        |     |     |        |      |     |       |     |    |
| 60 hpf                                                                                       | ~1                                                                                 | ~1                                                                                                                                                                                                                                                                                                                                                                                                                                                                                        |                     |                    |                    |       |     |     |        |     |     |        |     |     |        |      |     |       |     |    |
| Adult                                                                                        | ~65                                                                                | ~1                                                                                                                                                                                                                                                                                                                                                                                                                                                                                        |                     |                    |                    |       |     |     |        |     |     |        |     |     |        |      |     |       |     |    |
| <p>bfl-mir-4866<br/>ortholog at<br/>Sc0000043<br/>bp 1850204-<br/>1850295<br/>(+ strand)</p> | <p>5' arm:<br/>UCACACUUGUACUUCUUAGCAU</p> <p>3' arm:<br/>(low abundance)</p>       | <table border="1"> <caption>Abundance profile for bfl-mir-4866</caption> <thead> <tr> <th>Developmental stage</th> <th>5' arm miRNA (ppm)</th> <th>3' arm miRNA (ppm)</th> </tr> </thead> <tbody> <tr> <td>8 hpf</td> <td>~12</td> <td>~1</td> </tr> <tr> <td>15 hpf</td> <td>~1</td> <td>~1</td> </tr> <tr> <td>36 hpf</td> <td>~1</td> <td>~1</td> </tr> <tr> <td>60 hpf</td> <td>~26</td> <td>~4</td> </tr> <tr> <td>Adult</td> <td>~6</td> <td>~1</td> </tr> </tbody> </table>        | Developmental stage | 5' arm miRNA (ppm) | 3' arm miRNA (ppm) | 8 hpf | ~12 | ~1  | 15 hpf | ~1  | ~1  | 36 hpf | ~1  | ~1  | 60 hpf | ~26  | ~4  | Adult | ~6  | ~1 |
| Developmental stage                                                                          | 5' arm miRNA (ppm)                                                                 | 3' arm miRNA (ppm)                                                                                                                                                                                                                                                                                                                                                                                                                                                                        |                     |                    |                    |       |     |     |        |     |     |        |     |     |        |      |     |       |     |    |
| 8 hpf                                                                                        | ~12                                                                                | ~1                                                                                                                                                                                                                                                                                                                                                                                                                                                                                        |                     |                    |                    |       |     |     |        |     |     |        |     |     |        |      |     |       |     |    |
| 15 hpf                                                                                       | ~1                                                                                 | ~1                                                                                                                                                                                                                                                                                                                                                                                                                                                                                        |                     |                    |                    |       |     |     |        |     |     |        |     |     |        |      |     |       |     |    |
| 36 hpf                                                                                       | ~1                                                                                 | ~1                                                                                                                                                                                                                                                                                                                                                                                                                                                                                        |                     |                    |                    |       |     |     |        |     |     |        |     |     |        |      |     |       |     |    |
| 60 hpf                                                                                       | ~26                                                                                | ~4                                                                                                                                                                                                                                                                                                                                                                                                                                                                                        |                     |                    |                    |       |     |     |        |     |     |        |     |     |        |      |     |       |     |    |
| Adult                                                                                        | ~6                                                                                 | ~1                                                                                                                                                                                                                                                                                                                                                                                                                                                                                        |                     |                    |                    |       |     |     |        |     |     |        |     |     |        |      |     |       |     |    |
| <p>bbe-mir-9<br/>ortholog at<br/>Sc0000019<br/>bp 2253983-<br/>2254064<br/>(+ strand)</p>    | <p>5' arm:<br/>UCUUUGGUUAUCUAGCUGUAUGA</p> <p>3' arm:<br/>(low abundance)</p>      | <table border="1"> <caption>Abundance profile for bbe-mir-9</caption> <thead> <tr> <th>Developmental stage</th> <th>5' arm miRNA (ppm)</th> <th>3' arm miRNA (ppm)</th> </tr> </thead> <tbody> <tr> <td>8 hpf</td> <td>~5</td> <td>~1</td> </tr> <tr> <td>15 hpf</td> <td>~1</td> <td>~1</td> </tr> <tr> <td>36 hpf</td> <td>~10</td> <td>~1</td> </tr> <tr> <td>60 hpf</td> <td>~43</td> <td>~1</td> </tr> <tr> <td>Adult</td> <td>~4</td> <td>~1</td> </tr> </tbody> </table>           | Developmental stage | 5' arm miRNA (ppm) | 3' arm miRNA (ppm) | 8 hpf | ~5  | ~1  | 15 hpf | ~1  | ~1  | 36 hpf | ~10 | ~1  | 60 hpf | ~43  | ~1  | Adult | ~4  | ~1 |
| Developmental stage                                                                          | 5' arm miRNA (ppm)                                                                 | 3' arm miRNA (ppm)                                                                                                                                                                                                                                                                                                                                                                                                                                                                        |                     |                    |                    |       |     |     |        |     |     |        |     |     |        |      |     |       |     |    |
| 8 hpf                                                                                        | ~5                                                                                 | ~1                                                                                                                                                                                                                                                                                                                                                                                                                                                                                        |                     |                    |                    |       |     |     |        |     |     |        |     |     |        |      |     |       |     |    |
| 15 hpf                                                                                       | ~1                                                                                 | ~1                                                                                                                                                                                                                                                                                                                                                                                                                                                                                        |                     |                    |                    |       |     |     |        |     |     |        |     |     |        |      |     |       |     |    |
| 36 hpf                                                                                       | ~10                                                                                | ~1                                                                                                                                                                                                                                                                                                                                                                                                                                                                                        |                     |                    |                    |       |     |     |        |     |     |        |     |     |        |      |     |       |     |    |
| 60 hpf                                                                                       | ~43                                                                                | ~1                                                                                                                                                                                                                                                                                                                                                                                                                                                                                        |                     |                    |                    |       |     |     |        |     |     |        |     |     |        |      |     |       |     |    |
| Adult                                                                                        | ~4                                                                                 | ~1                                                                                                                                                                                                                                                                                                                                                                                                                                                                                        |                     |                    |                    |       |     |     |        |     |     |        |     |     |        |      |     |       |     |    |
| <p>bfl-mir-217<br/>ortholog at<br/>Sc0000230 bp<br/>138098-138165<br/>(+ strand)</p>         | <p>5' arm:<br/>UACUGCAUCAGGAACUGAUUGG</p> <p>3' arm:<br/>AAUCUGUCCUCAUGCAUGGCU</p> | <table border="1"> <caption>Abundance profile for bfl-mir-217</caption> <thead> <tr> <th>Developmental stage</th> <th>5' arm miRNA (ppm)</th> <th>3' arm miRNA (ppm)</th> </tr> </thead> <tbody> <tr> <td>8 hpf</td> <td>~10</td> <td>~10</td> </tr> <tr> <td>15 hpf</td> <td>~10</td> <td>~10</td> </tr> <tr> <td>36 hpf</td> <td>~80</td> <td>~10</td> </tr> <tr> <td>60 hpf</td> <td>~450</td> <td>~20</td> </tr> <tr> <td>Adult</td> <td>~20</td> <td>~5</td> </tr> </tbody> </table> | Developmental stage | 5' arm miRNA (ppm) | 3' arm miRNA (ppm) | 8 hpf | ~10 | ~10 | 15 hpf | ~10 | ~10 | 36 hpf | ~80 | ~10 | 60 hpf | ~450 | ~20 | Adult | ~20 | ~5 |
| Developmental stage                                                                          | 5' arm miRNA (ppm)                                                                 | 3' arm miRNA (ppm)                                                                                                                                                                                                                                                                                                                                                                                                                                                                        |                     |                    |                    |       |     |     |        |     |     |        |     |     |        |      |     |       |     |    |
| 8 hpf                                                                                        | ~10                                                                                | ~10                                                                                                                                                                                                                                                                                                                                                                                                                                                                                       |                     |                    |                    |       |     |     |        |     |     |        |     |     |        |      |     |       |     |    |
| 15 hpf                                                                                       | ~10                                                                                | ~10                                                                                                                                                                                                                                                                                                                                                                                                                                                                                       |                     |                    |                    |       |     |     |        |     |     |        |     |     |        |      |     |       |     |    |
| 36 hpf                                                                                       | ~80                                                                                | ~10                                                                                                                                                                                                                                                                                                                                                                                                                                                                                       |                     |                    |                    |       |     |     |        |     |     |        |     |     |        |      |     |       |     |    |
| 60 hpf                                                                                       | ~450                                                                               | ~20                                                                                                                                                                                                                                                                                                                                                                                                                                                                                       |                     |                    |                    |       |     |     |        |     |     |        |     |     |        |      |     |       |     |    |
| Adult                                                                                        | ~20                                                                                | ~5                                                                                                                                                                                                                                                                                                                                                                                                                                                                                        |                     |                    |                    |       |     |     |        |     |     |        |     |     |        |      |     |       |     |    |
